# Supplementary material for: Conditional antagonism in co-cultures of Pseudomonas aeruginosa and Candida albicans: An intersection of ethanol and phosphate signaling distilled from dual-seq transcriptomics
Source: PLoS Genet. 2020 Aug 19;16(8):e1008783. doi: 10.1371/journal.pgen.1008783 (PMC7480860; doi:10.1371/journal.pgen.1008783)
Supplement: S1 Dataset — (XLSX) [file pgen.1008783.s007.xlsx]

## Sheet: legend
S1 Dataset: C.a. DEGS in co-culture with P.a.
Supplemental Dataset 1: Results from the EdgeR analysis showing fold-changes and associated statistics comparing C.a. gene expression between C.a. WT vs C.a. adh1∆/∆ when grown with P.a. (tab 1, tab 2 shows same data for only Pho4-regulated genes) and without P.a. (tab 3) as well as C.a. gene expression between C.a. WT with vs without P.a. (tab 5) and C.a. adh1∆/∆ with vs. without P.a. (tab 6). L…

## Sheet: 1-edgeR_Ca_WTvadh1_wPa_ca
genes	logFC	logCPM	F	PValue	FDR
ADH1	10.9716	9.78809	797.053	7.85655e-16	2.37228e-12
CAALFM_C300140WA	8.0667	0.0134852	12.923	0.00562264	0.0169352
CAALFM_C700500WA	6.70319	-0.454628	7.65891	0.0158362	0.0390507
RBR1	-5.73482	0.648579	42.8348	4.76129e-06	8.98545e-05
PGA30	-5.63775	0.766821	77.2555	9.15395e-08	5.58391e-06
HIS1	4.99093	4.14306	910.968	2.55002e-16	1.53996e-12
ACE2	-4.64008	7.2729	104.729	1.00037e-08	1.18456e-06
CAALFM_CR08270WA	-4.43111	4.44399	213.664	7.55421e-12	5.70248e-09
CAALFM_C702280WA	-4.418	2.51442	59.1622	5.8202e-07	1.94189e-05
HSP104	-4.192	11.1901	59.8312	2.59614e-07	1.14438e-05
ATO7	4.17942	0.37094	61.3417	1.03808e-06	2.97107e-05
PGA31	-3.95636	3.12818	94.8321	2.08278e-08	1.9653e-06
SSA2	-3.94827	9.99024	91.0829	1.02376e-08	1.18895e-06
MTLA2	-3.94696	1.5945	246.005	1.30225e-11	8.73812e-09
CAALFM_C700350CA	-3.87463	10.7362	69.8729	8.11815e-08	5.2227e-06
HGT12	-3.77612	3.68634	51.3407	1.49398e-06	3.93981e-05
CAALFM_C204000CA	-3.74771	1.01592	60.2949	5.11939e-07	1.79744e-05
CAALFM_C306880WA	-3.72801	-0.130492	29.1218	4.66268e-05	0.000426635
LDG3	-3.71576	-0.426577	37.0589	1.15676e-05	0.000170799
CAALFM_C401800WA	-3.61387	2.55609	78.5555	8.12938e-08	5.2227e-06
CAALFM_C702250WA	-3.61098	1.04411	67.0414	2.47522e-07	1.11551e-05
HWP1	-3.58397	0.789776	45.482	3.26299e-06	6.91411e-05
HAP3	-3.55249	5.37999	219.403	3.26208e-11	1.79088e-08
CAALFM_C602100WA	-3.5454	5.56731	195.519	8.16529e-11	3.08189e-08
CSA1	-3.36608	8.60758	130.783	5.24265e-10	1.37654e-07
SIS1	-3.33171	7.15898	108.242	7.82306e-09	1.02703e-06
CAALFM_C105970WA	-3.15238	2.81276	45.9619	3.05234e-06	6.60684e-05
CAALFM_C210320CA	-3.07378	0.386422	56.0942	8.32138e-07	2.53802e-05
CAALFM_CR06500CA	-3.07235	3.76726	54.8293	9.68596e-07	2.83949e-05
CAALFM_CR00650WA	-3.05352	-0.420683	32.38	2.5585e-05	0.000286657
AHA1	-3.00176	5.51302	82.6451	5.65443e-08	4.11411e-06
PGA13	-3.00065	4.74878	62.1655	1.95598e-07	9.61628e-06
NAT4	-2.95642	2.29227	107.921	7.99828e-09	1.02769e-06
CAALFM_C102690CA	-2.93635	-0.233254	35.3798	1.52506e-05	0.000204462
CAALFM_C301540WA	-2.90789	1.74223	33.3436	2.15926e-05	0.0002532
GIG1	-2.90445	3.07819	63.7011	3.51986e-07	1.4132e-05
CAALFM_CR04770CA	-2.89865	1.85121	33.6809	2.0364e-05	0.000246391
ARG4	-2.89721	7.99929	203.708	5.89501e-11	2.57917e-08
HSP21	-2.88571	9.40061	51.363	7.83038e-07	2.43481e-05
HSP90	-2.88305	10.195	52.4435	6.75192e-07	2.16887e-05
CAALFM_C103890WA	-2.87009	-0.524384	62.2031	4.14189e-07	1.59435e-05
LIP10	-2.86395	-0.711502	14.1387	0.00153731	0.00617686
CAALFM_C104270CA	-2.84018	-0.380125	31.2704	3.1239e-05	0.000319749
MRV5	-2.82481	1.27968	70.0013	1.83307e-07	9.57301e-06
CAALFM_C403760WA	-2.79532	-0.232863	32.6919	2.4209e-05	0.000274332
GIT4	-2.79261	0.0709901	60.6584	4.9149e-07	1.76673e-05
HAK1	-2.7862	2.65617	28.3509	5.4088e-05	0.000476843
CAALFM_CR06990WA	-2.77014	-0.805466	20.9687	0.000260416	0.00159985
CAALFM_C401640CA	-2.7275	-0.149121	14.4169	0.00141869	0.0057707
PGA12	-2.71988	-0.401923	24.8427	0.000110072	0.00081671
MCD1	-2.7036	1.11839	59.9592	5.31674e-07	1.84744e-05
CTF5	-2.69925	-0.297991	28.2578	5.50759e-05	0.000484138
ZRT2	2.69332	7.16902	59.9279	2.56543e-07	1.14081e-05
NAG4	-2.67006	0.550872	60.7652	4.85652e-07	1.76064e-05
GIT1	-2.6469	1.26177	49.4296	1.91269e-06	4.7339e-05
CAALFM_C107480CA	-2.59404	0.764502	45.0421	3.47047e-06	7.25196e-05
CAALFM_CR10320WA	2.59266	2.64326	16.6395	0.000767205	0.00362248
CHA1	-2.58856	5.4057	30.5894	3.53948e-05	0.00034756
CAALFM_C106220CA	-2.5785	1.28967	59.2322	5.77389e-07	1.94098e-05
PGA6	-2.56155	1.42022	56.7133	7.73285e-07	2.41962e-05
CAALFM_C202550CA	-2.55739	5.03499	57.1298	7.36307e-07	2.31592e-05
CAALFM_C602550WA	-2.54665	-0.778938	30.4508	3.63143e-05	0.000353713
MCM3	-2.54431	6.49383	263.462	1.17053e-12	1.7672e-09
GCV1	-2.53004	4.89659	139.796	1.12376e-09	2.22937e-07
tE(UUC)3	2.5201	-0.846435	27.0151	7.03967e-05	0.00057919
CAALFM_CR08260CA	-2.49911	-1.11012	9.15023	0.006917	0.0199483
ZRT1	2.47702	4.88671	26.1664	8.35943e-05	0.000666878
CAG1	-2.45996	3.91234	99.7342	1.43713e-08	1.45745e-06
CDC46	-2.4539	4.83	159.22	9.82343e-11	3.48963e-08
CRD2	2.45354	4.72825	72.2157	1.47401e-07	8.09469e-06
CAALFM_CR00380WA	2.45238	3.14067	31.479	3.00773e-05	0.000313439
STE2	-2.45194	2.58786	112.7	5.78242e-09	7.93637e-07
CAALFM_C304840CA	-2.44535	7.1857	173.335	4.71623e-11	2.37344e-08
HNT2	2.4436	4.68229	40.5341	6.70677e-06	0.000115391
CAALFM_CR06070WA	-2.43637	5.77583	157.034	4.56953e-10	1.25434e-07
CAALFM_CR05190WA	-2.41778	0.0123753	34.5937	1.74127e-05	0.000222786
CAALFM_C501230CA	-2.41075	5.12624	379.135	3.83776e-13	7.7254e-10
PBR1	-2.39456	1.74524	50.8718	1.58632e-06	4.11174e-05
YOX1	-2.39104	-0.127737	11.8922	0.00303186	0.0106203
CAALFM_C305660CA	-2.37205	-0.236501	25.9588	8.72289e-05	0.000682541
tR(CCG)1	2.37106	0.385736	49.9933	1.77693e-06	4.47782e-05
SCW11	-2.36604	3.05024	33.024	2.28339e-05	0.000264425
CAALFM_C208150WA	-2.36442	-0.147087	29.8748	4.04328e-05	0.000382119
RCH1	2.36183	7.31392	34.9986	1.03583e-05	0.000156777
MNN13	-2.34665	4.93179	80.4214	6.87528e-08	4.73784e-06
MCM2	-2.34242	5.37316	293.591	3.11185e-12	3.32065e-09
CAALFM_C104690CA	-2.33293	1.18321	66.1879	2.70453e-07	1.17501e-05
CAALFM_CR00010CA	-2.32265	5.36973	187.356	1.14429e-10	3.83908e-08
SBA1	-2.31988	2.48869	44.9252	3.52809e-06	7.28948e-05
FET99	-2.2921	1.5762	62.2451	4.12289e-07	1.59435e-05
LYS5	-2.27555	-0.2655	14.7921	0.00127466	0.00528322
HSP70	-2.27466	11.2024	32.0896	1.78238e-05	0.000227084
TES1	-2.26139	4.91614	74.5483	1.17845e-07	6.87791e-06
MFA1	2.25786	1.35873	19.503	0.000369684	0.00204631
CAALFM_C400530CA	-2.23447	2.00417	10.5004	0.00476176	0.0149694
YBL053	-2.22167	4.63196	133.189	1.6294e-09	2.98179e-07
CAALFM_C701750WA	2.21624	4.37607	45.6115	3.20458e-06	6.84629e-05
CAALFM_C205960CA	-2.20716	3.10843	31.7942	2.84128e-05	0.000306401
CAALFM_C401630CA	-2.20631	0.595007	8.66452	0.00901255	0.024657
CAALFM_C600760WA	-2.20252	5.15389	48.5681	2.14311e-06	5.11808e-05
CDC54	-2.19254	4.94353	233.792	3.40169e-12	3.32065e-09
CAALFM_C702130WA	-2.18882	-0.335805	32.7987	2.3757e-05	0.000271207
CAALFM_C405580CA	2.18874	6.11693	14.7682	0.00128332	0.00530819
CAALFM_CR07300WA	-2.18136	0.955151	38.8683	8.67159e-06	0.000138539
GAL1	-2.17824	7.42227	60.583	4.95653e-07	1.77115e-05
CFL11	-2.17218	0.225584	29.1053	4.67739e-05	0.000427069
CDC21	-2.16824	2.98012	117.44	4.24062e-09	6.17215e-07
RNR21	-2.15859	7.49889	230.564	3.84907e-12	3.32065e-09
CAALFM_C603600CA	2.14707	8.50547	16.223	0.000708344	0.00338693
OYE32	2.14296	9.49204	29.2105	3.15068e-05	0.000321402
CAALFM_CR09390CA	-2.1423	-0.738929	10.7785	0.00434211	0.0139925
PHO114	-2.14129	3.38089	104.094	1.04667e-08	1.19261e-06
CDR2	-2.14031	6.31165	48.7631	2.08835e-06	5.02452e-05
ECM38	2.13088	5.65355	30.5159	3.58796e-05	0.00035061
OYE23	2.12744	6.35046	15.6057	0.00101533	0.00448873
TAR1	-2.12274	11.5181	16.5379	0.000788291	0.00370466
CAALFM_C102700CA	-2.11207	6.57706	17.0624	0.00055948	0.00284301
CAALFM_C204610CA	-2.10411	-0.549205	15.1434	0.00115452	0.00492975
CAALFM_CR06920WA	-2.08262	-0.51373	15.8103	0.000959846	0.00431288
CFL4	-2.08259	3.44485	23.3321	0.0001524	0.00105062
LIP2	-2.07972	1.07213	21.2954	0.000241328	0.00150245
CAALFM_C111410CA	-2.06852	1.29262	31.6234	2.93016e-05	0.000311527
CTF8	-2.06605	0.0283758	23.1534	0.000158515	0.00108534
CAALFM_C701390WA	-2.06321	2.98667	19.5539	0.000365115	0.00203407
CAALFM_C700380WA	-2.06004	3.11331	166.82	2.8511e-10	8.19896e-08
CAALFM_CR09240CA	-2.05681	6.19423	52.9701	6.28672e-07	2.05219e-05
CAALFM_C602760WA	-2.05129	0.0676339	35.6157	1.46617e-05	0.00020169
MET3	2.05125	5.68902	40.3604	6.88641e-06	0.000117477
CAALFM_CR06190CA	-2.04917	-0.635126	5.57382	0.0303079	0.0657433
CAALFM_C504140WA	-2.04665	-0.458367	20.3044	0.000304682	0.0017941
TDH3	-2.03898	11.1776	36.1661	8.40155e-06	0.000136024
CAALFM_C503430WA	2.03167	0.82984	33.5771	2.07336e-05	0.000247594
CAALFM_C106620CA	-2.03069	-0.263534	16.2278	0.000856812	0.00394984
CAALFM_C302330CA	-2.02853	0.821827	29.2526	3.12375e-05	0.000319749
MRV3	-2.02847	0.144202	17.762	0.000571841	0.002885
ASF1	-2.02787	1.45644	55.6257	8.80006e-07	2.64396e-05
CAALFM_C404860WA	-2.02752	4.69549	49.5158	1.8912e-06	4.69999e-05
RIB4	-2.02611	3.92613	124.468	2.73095e-09	4.45736e-07
PGA37	-2.02509	3.87175	29.7159	4.1659e-05	0.000391258
CAALFM_C703780CA	-2.01513	4.99451	25.1679	0.00010279	0.000775039
ECM17	2.01394	8.5499	112.192	5.98188e-09	8.02769e-07
CAALFM_C106340WA	-2.01133	0.945754	29.5591	2.93524e-05	0.000311527
CAALFM_C210020CA	-2.0066	0.609409	15.6979	0.000989885	0.00441175
BMT9	-2.00193	4.16967	102.357	1.18588e-08	1.30209e-06
RNR1	-1.99478	6.94873	122.469	3.0881e-09	4.90763e-07
FGR23	-1.98947	5.44426	126.601	2.39989e-09	4.06351e-07
MCM6	-1.98747	5.92943	223.739	2.7894e-11	1.68452e-08
HST6	-1.98423	2.37897	47.2548	2.55648e-06	5.78225e-05
STI1	-1.9756	8.17986	49.3773	1.03448e-06	2.97107e-05
RBT5	-1.97395	8.88019	14.5876	0.00114231	0.00489251
GLT1	1.9693	10.1791	141.006	2.77477e-10	8.19896e-08
CAALFM_C702210WA	-1.96926	-0.332648	20.6666	0.000279587	0.00169351
ITS2	-1.9616	2.66252	15.1287	0.00115929	0.00494275
CAALFM_CR04990CA	-1.94863	0.00655721	29.0269	4.74798e-05	0.000432474
CAALFM_CR09140CA	-1.9319	8.48535	36.2744	8.24187e-06	0.000134885
CAALFM_CR05210WA	-1.9272	0.09975	13.8092	0.0016924	0.00666692
CAALFM_C403370CA	-1.92064	6.60683	71.134	7.08244e-08	4.80572e-06
HEX3	1.92058	7.25226	62.1964	4.14494e-07	1.59435e-05
CAALFM_CR02270CA	-1.92058	4.86746	76.1398	4.19672e-08	3.33473e-06
CAALFM_C107040CA	-1.91817	-0.653031	14.7592	0.00128661	0.00531818
INO1	1.90481	10.6289	15.8792	0.000781587	0.00367888
MET15	1.90146	5.67773	18.5044	0.000473443	0.0024874
CAALFM_C207650CA	-1.89494	3.94572	141.223	1.03921e-09	2.16407e-07
CAALFM_C205980CA	-1.88687	6.69885	48.4456	2.17833e-06	5.17911e-05
KIP2	-1.88294	1.93555	32.0211	2.72777e-05	0.000300054
CAALFM_C503030WA	1.88215	1.54315	38.2109	5.88554e-06	0.000103623
CAALFM_CR01220WA	-1.87477	1.26148	27.8848	5.92421e-05	0.000508909
CAALFM_C401760WA	-1.87445	3.90594	36.2936	1.31061e-05	0.000184924
CAALFM_C306630WA	-1.86194	2.6198	48.8466	2.0654e-06	5.00446e-05
CAALFM_C202230CA	1.86014	6.87299	19.1668	0.000401467	0.00217635
CAALFM_C501990WA	-1.85992	0.34766	21.0598	0.000254933	0.00157417
FGR22	1.85792	3.59394	30.3677	3.68788e-05	0.000357325
CAALFM_C206760CA	-1.84839	0.278075	29.4253	4.40112e-05	0.00041016
OSM2	1.84382	9.12626	20.8165	0.000208492	0.00133847
CAALFM_C206630CA	-1.84357	2.54747	48.3563	2.20441e-06	5.22056e-05
STE4	-1.83727	4.93577	78.1819	8.41006e-08	5.23591e-06
CAALFM_C301310WA	-1.83387	5.22401	89.8507	1.14141e-08	1.27648e-06
CAALFM_C110340WA	-1.83131	5.37584	176.105	1.86433e-10	5.92561e-08
FAA2-1	1.82698	6.19479	84.2383	4.92867e-08	3.76763e-06
ESC4	-1.82222	0.818235	33.8934	1.96299e-05	0.000240457
ALK6	-1.81537	3.29878	69.9116	1.84955e-07	9.57301e-06
CAALFM_C102670CA	-1.80951	1.97441	48.9638	2.03362e-06	4.95203e-05
FET31	-1.80903	8.42776	168.652	5.97921e-11	2.57917e-08
CAALFM_C108960WA	-1.80222	3.68554	10.6249	0.00456852	0.014536
POL30	-1.8008	3.35835	106.627	8.75139e-09	1.05854e-06
CAALFM_C400730CA	-1.79614	-0.425855	10.0835	0.00547939	0.0166256
CAALFM_CR00220WA	1.79427	5.36026	58.8795	6.01137e-07	1.98375e-05
CAALFM_C107490CA	-1.78972	2.41303	69.5294	1.92162e-07	9.59064e-06
ERG28	-1.78865	1.40654	31.478	3.00828e-05	0.000313439
CAALFM_C400990WA	-1.78865	0.275385	19.7789	0.00027107	0.00165688
TNA1	1.78834	4.62086	99.8884	1.42081e-08	1.45745e-06
CAALFM_C105920WA	-1.78708	4.06874	55.5941	4.4391e-07	1.67548e-05
CAALFM_C206770WA	-1.78482	1.21832	25.6381	9.3197e-05	0.000716964
CYP1	-1.78396	7.57739	44.6709	2.07173e-06	5.00446e-05
ADH3	-1.78231	3.5858	67.6723	2.31966e-07	1.06678e-05
CAALFM_C704310CA	1.78103	5.4884	137.449	1.27992e-09	2.41544e-07
CAALFM_C304210WA	-1.77995	3.23043	14.6088	0.00134286	0.00552421
CAALFM_C201420CA	-1.77974	2.51592	143.188	9.34224e-10	2.16407e-07
CAALFM_CR03270WA	-1.77803	3.63344	30.6652	3.49033e-05	0.000345542
CAALFM_C500620WA	-1.77762	0.386357	13.238	0.00200477	0.00763356
CAALFM_C202620WA	-1.7767	5.01964	139.465	1.1444e-09	2.22937e-07
CEK2	-1.77666	4.85716	34.6403	1.10562e-05	0.00016405
CAALFM_CR06650CA	-1.77159	3.54717	11.095	0.00391431	0.012868
GAD1	-1.75975	6.32515	80.8414	2.63155e-08	2.33705e-06
tL(CAA)6	1.75974	-0.588228	19.5262	0.000367595	0.00204201
CAALFM_C112000CA	-1.75318	-0.725683	10.6299	0.00456099	0.014535
CAALFM_C202390WA	-1.75021	5.8562	28.878	3.37255e-05	0.000336198
CAALFM_C109520CA	-1.74978	5.88665	79.7587	7.29411e-08	4.84056e-06
CAALFM_CR08420WA	-1.74812	7.32672	40.0219	7.25215e-06	0.0001228
COI1	-1.7467	5.52615	20.5235	0.000289212	0.00173109
CAALFM_C112910WA	-1.74427	3.85863	13.8327	0.00168077	0.00663846
CAALFM_CR06870CA	-1.74353	3.32608	69.7481	1.88001e-07	9.57301e-06
CAALFM_C206530WA	-1.7425	4.41355	32.2821	2.60351e-05	0.000290085
RAM2	-1.74153	3.62183	141.615	1.01727e-09	2.16407e-07
OPT5	-1.73952	1.99841	31.6624	2.90958e-05	0.000310532
CSR1	1.73889	4.40643	37.5577	1.06738e-05	0.000159323
CAALFM_CR09060WA	-1.73684	-0.731808	5.68402	0.0289182	0.0634814
PGA38	-1.73438	3.93898	10.2324	0.00521004	0.0160119
CAALFM_C503740WA	-1.73001	4.5658	74.4945	1.18447e-07	6.87791e-06
IRR1	-1.72866	4.08566	197.359	7.5807e-11	3.05199e-08
PEP12	1.71519	5.52134	34.8277	1.06849e-05	0.000159323
FMA1	-1.71454	1.50187	53.3057	1.16726e-06	3.21877e-05
MSI3	-1.71323	9.4713	41.3659	3.48416e-06	7.25546e-05
CDC47	-1.71212	5.17165	142.893	9.49236e-10	2.16407e-07
CAALFM_C302290WA	-1.70707	3.66455	85.9265	4.27112e-08	3.34977e-06
CAALFM_C600220CA	-1.70688	0.858359	7.75359	0.0126277	0.0324193
HGT2	-1.70618	10.0052	42.6154	2.8529e-06	6.31086e-05
CAALFM_C402460WA	-1.70418	0.683086	12.3056	0.00266401	0.00965665
DAL52	1.70227	1.28325	23.9181	9.91475e-05	0.000753761
PCL1	-1.69889	2.86889	64.1867	3.34121e-07	1.38799e-05
CAALFM_C404160WA	1.69794	6.83491	26.4353	5.64804e-05	0.000493611
CAALFM_C112690CA	-1.6937	-0.108552	16.4842	0.000799717	0.00374773
CAALFM_C703580CA	-1.68774	5.58838	99.6137	4.97834e-09	6.99167e-07
MET14	1.68469	3.39642	21.2794	0.000242229	0.00150496
CAALFM_C202080WA	-1.68386	0.9127	8.92447	0.00820744	0.0228409
FAT1	1.68068	8.61982	55.1268	4.71856e-07	1.72699e-05
CAALFM_C200770WA	-1.67396	5.92961	68.4562	2.1414e-07	1.01826e-05
NGT1	-1.67246	3.09586	12.1268	0.00281663	0.0100293
HGT9	1.66669	3.122	33.1996	2.21423e-05	0.000258641
HMX1	-1.66494	9.25756	29.3744	3.04729e-05	0.000315536
CAALFM_C601490CA	1.6581	5.68122	23.9667	0.000132726	0.000938901
CAALFM_C104490WA	-1.65618	6.20389	53.1631	6.12512e-07	2.01031e-05
CAALFM_C204670WA	1.65231	1.22694	18.1401	0.000416844	0.00223467
GPM2	-1.65011	5.48088	48.1088	2.27852e-06	5.375e-05
CAALFM_C600730WA	1.64197	3.94845	39.2468	4.93893e-06	9.23411e-05
RNR22	-1.64045	7.27758	34.881	1.05819e-05	0.000158965
DCC1	-1.6366	2.50413	106.844	8.62021e-09	1.05854e-06
HGT7	-1.62927	11.2932	19.795	0.000269958	0.00165383
CAALFM_C200180CA	1.62793	6.69492	30.9385	2.2291e-05	0.000259875
CAALFM_C102380CA	-1.62714	1.06464	18.5853	0.000463923	0.00244607
NRM1	-1.62166	1.52436	29.1297	4.65565e-05	0.000426635
CAALFM_C306920WA	-1.62086	3.01725	43.3226	4.43544e-06	8.5577e-05
CAALFM_C113000WA	-1.61757	0.181235	13.6074	0.00179605	0.00699318
RPS27A	-1.61659	1.94248	8.92494	0.00820603	0.0228409
DAG7	-1.61624	6.79346	31.655	2.91345e-05	0.000310532
CAALFM_C703200CA	-1.61562	5.19281	87.0402	3.89115e-08	3.13316e-06
CAALFM_C103870CA	-1.61418	4.18584	26.1329	8.41679e-05	0.000668721
RBE1	-1.61036	0.675808	12.4691	0.00253267	0.00926397
PEX19	1.61026	6.30739	55.1641	9.30191e-07	2.75364e-05
CAALFM_C401340WA	-1.60744	2.71859	10.3044	0.0050851	0.015724
CAALFM_C205290CA	-1.60284	3.26962	16.2937	0.000841713	0.00390108
PMS1	-1.60172	2.25139	36.327	1.30344e-05	0.000184343
IFA14	-1.59904	4.89212	47.6805	1.32112e-06	3.49922e-05
FGR10	1.59579	3.66813	142.225	9.84116e-10	2.16407e-07
FRP2	-1.59344	7.75856	35.072	1.02214e-05	0.000155877
FRP1	-1.59195	7.83555	57.565	3.44588e-07	1.39662e-05
CYB2	1.59105	8.10866	17.3774	0.000512864	0.00264943
CAALFM_C306640WA	-1.59005	2.1106	18.9124	0.000427544	0.00228086
OGG1	-1.58872	3.46948	93.1972	2.36581e-08	2.16471e-06
OST1	-1.58846	4.08626	30.7769	3.4192e-05	0.000339614
GTT12	-1.58265	1.95486	35.8057	1.42057e-05	0.000196312
CAALFM_CR02630CA	-1.58031	-0.19306	10.4463	0.00484872	0.0151639
PHM7	-1.57886	9.11988	19.5146	0.000290166	0.00173325
CDC6	-1.57672	1.5287	32.2569	2.61521e-05	0.000290851
HCH1	-1.57659	4.20008	30.4369	3.64085e-05	0.000354059
HCM1	-1.57586	2.68615	83.9249	5.06281e-08	3.82088e-06
PDC11	-1.57389	10.3137	30.4552	2.45252e-05	0.000277355
CAALFM_C205570CA	-1.573	5.17366	43.9974	4.02492e-06	7.9433e-05
QDR1	-1.56452	5.33965	18.5751	0.000465111	0.00244883
CAALFM_C405830WA	1.5611	1.54255	32.0408	2.7182e-05	0.000300054
CAALFM_C301640CA	-1.55692	0.879242	31.085	3.23135e-05	0.00032687
CAALFM_C504380CA	-1.55466	3.15356	37.1138	1.14651e-05	0.0001697
CAALFM_CR08310CA	-1.5535	2.14882	44.9267	3.52733e-06	7.28948e-05
CAALFM_C403880WA	-1.54735	2.58407	62.3128	4.0924e-07	1.59435e-05
CAALFM_C207790CA	-1.54574	1.10403	28.1573	5.61654e-05	0.000491569
POT1-2	-1.54327	5.07071	25.8549	8.91149e-05	0.000690841
CAALFM_C202420CA	1.54106	5.0752	149.063	6.8472e-10	1.72293e-07
CAALFM_CR07250CA	1.53937	7.56357	30.1578	2.6022e-05	0.000290085
SMC2	-1.53256	3.75142	69.6306	1.90224e-07	9.57301e-06
CAALFM_CR10190CA	-1.53195	2.19527	50.1911	1.73187e-06	4.41298e-05
SMI1B	-1.5316	3.65099	120.089	3.58299e-09	5.40943e-07
FAR1	-1.52655	4.30976	84.3521	4.88099e-08	3.76763e-06
PGA7	-1.52609	6.8212	26.0076	8.63583e-05	0.000680511
MIS11	-1.52348	6.62606	77.2749	3.7416e-08	3.05345e-06
CAALFM_C603740WA	-1.52215	0.678957	35.2046	1.57051e-05	0.000208446
CHS8	-1.51723	4.9262	98.1306	1.61974e-08	1.57768e-06
PGK1	-1.51678	9.19555	33.0227	1.49247e-05	0.00020254
DDR48	-1.51646	8.88722	29.5296	2.9528e-05	0.000311615
CAALFM_CR02900WA	-1.51488	-0.103544	11.9769	0.00295205	0.0104041
PRM1	-1.51386	3.27156	63.6649	3.53359e-07	1.4132e-05
EMP24	-1.51161	4.25651	69.9519	8.04854e-08	5.2227e-06
PSF2	-1.511	1.94397	35.8191	1.41743e-05	0.000196312
CAALFM_CR02600WA	-1.50805	0.00623846	23.3852	0.000150634	0.00104082
MIF2	-1.50685	7.31539	38.7979	5.32675e-06	9.66012e-05
CAALFM_C106970CA	-1.50643	7.94764	45.4814	1.83145e-06	4.57031e-05
CAALFM_CR10120CA	-1.50533	1.43527	25.9098	8.81129e-05	0.000686598
CAALFM_C110240CA	-1.50517	3.24594	72.0077	1.50416e-07	8.11037e-06
SMC3	-1.50449	3.2338	63.9376	3.43155e-07	1.39662e-05
CDR4	-1.50408	11.6504	17.1075	0.000552521	0.00281814
PHO100	-1.50101	1.32701	32.9791	2.30149e-05	0.000265749
CAALFM_C305840WA	-1.50001	1.19355	17.7866	0.000568223	0.00287421
CAALFM_C112180CA	-1.49467	2.12214	33.7961	1.99621e-05	0.000243047
CAALFM_C201260WA	-1.49354	2.80713	71.378	1.59969e-07	8.54914e-06
CAALFM_C210000CA	-1.49292	3.04505	14.9636	0.00121435	0.00510333
PMT2	-1.49272	6.53745	25.4993	6.93539e-05	0.000574213
CAALFM_C102370CA	-1.4887	3.34349	16.1401	0.000877372	0.00403465
CAALFM_CR09810WA	-1.48676	1.16776	28.9605	4.80873e-05	0.000436404
CAALFM_C602480WA	-1.48571	4.86531	49.2157	1.05858e-06	3.00131e-05
PHO8	-1.48539	2.01942	6.66282	0.0193134	0.0456671
RCT1	-1.48475	9.93916	15.8455	0.000789222	0.00370527
CAALFM_C702190WA	-1.48379	-0.0447627	3.93844	0.0634133	0.118819
AFG1	-1.48306	4.91708	73.9161	1.25143e-07	7.19749e-06
CAALFM_C307540CA	-1.48223	1.83357	35.4549	1.50603e-05	0.000203263
FRE10	-1.47858	7.00902	12.5413	0.00215716	0.00812669
SFH5	-1.47833	5.45265	77.6842	3.5911e-08	2.97078e-06
CAALFM_CR03470WA	-1.4772	3.70076	60.7427	4.86879e-07	1.76064e-05
PGI1	-1.47273	7.82059	43.3163	2.55491e-06	5.78225e-05
CAALFM_C601520WA	1.47056	5.68025	12.2659	0.00269708	0.00974144
CAALFM_C108150CA	-1.46851	-0.403595	12.793	0.00199	0.00759167
RPR1	-1.46724	11.3101	24.5071	8.66502e-05	0.000680511
CAALFM_C305400CA	-1.46616	1.64376	9.26557	0.00727135	0.0207463
PIR1	-1.46368	8.17766	55.1779	4.68709e-07	1.72594e-05
BTA1	-1.45703	2.62319	10.4796	0.00479496	0.0150269
EFH1	-1.45666	1.69873	30.0756	3.8941e-05	0.000372096
CAALFM_C700340CA	-1.45608	6.91964	47.1661	2.58745e-06	5.83046e-05
FAA2-3	1.45515	7.66662	34.1083	1.21901e-05	0.000177592
CAALFM_C500510WA	-1.45494	1.50348	21.3006	0.000241039	0.0015022
CAALFM_C402100CA	-1.45187	2.39099	34.109	1.89154e-05	0.000234089
GRX1	-1.45172	-0.531475	14.9341	0.0012245	0.00513584
SOU2	-1.45136	3.07014	21.4985	0.00023025	0.001456
AYR2	1.44765	6.10755	26.1271	8.42684e-05	0.000668721
PRY1	1.44527	3.06436	9.15302	0.00756621	0.0214116
CAALFM_C103470CA	-1.44519	0.7777	22.8381	0.000169986	0.0011406
MLC1	-1.44366	2.30748	27.2619	6.70101e-05	0.000560491
CAALFM_C304150WA	-1.44001	14.3043	20.409	0.000230925	0.00145874
CAALFM_C207620WA	-1.43979	1.00517	19.5646	0.000364168	0.00203067
FCY24	-1.43472	3.55544	81.7141	6.13339e-08	4.40947e-06
CAALFM_C209980WA	-1.43338	6.4707	82.6568	5.64869e-08	4.11411e-06
CAALFM_C406910WA	1.43324	7.57302	15.6984	0.000823467	0.00383713
CAALFM_C106870CA	-1.43031	3.2116	14.9337	0.00122464	0.00513584
GPX3	-1.42998	3.50974	37.8762	1.01435e-05	0.000155174
CAALFM_C100820WA	-1.42939	1.44453	12.2118	0.00274286	0.00984787
RTA3	-1.42685	8.13171	33.066	1.48035e-05	0.000202259
CAALFM_C701910CA	-1.42629	4.97691	54.2902	1.03422e-06	2.97107e-05
KRE5	-1.42496	5.5161	26.7633	7.40525e-05	0.000604329
CAALFM_C205050CA	1.42264	5.3871	17.8448	0.000559804	0.00284301
CAALFM_C101180CA	1.42249	3.55938	44.4114	3.79416e-06	7.63764e-05
CAALFM_C306550CA	-1.42208	3.21324	35.4475	1.5079e-05	0.000203263
ZCF16	1.42055	6.54703	49.4381	1.02558e-06	2.97107e-05
YVC1	-1.41992	4.05717	64.339	3.28727e-07	1.3786e-05
CAALFM_C112090CA	-1.41961	-0.128436	9.43925	0.00684147	0.0197588
FOX3	1.41318	7.53378	39.087	5.07325e-06	9.34066e-05
POL1	-1.41222	5.08929	29.6055	4.25359e-05	0.000398255
CAALFM_C207280WA	-1.41211	3.43196	21.0062	0.000258143	0.00158966
GAL102	-1.41106	4.88485	48.2274	1.22014e-06	3.30422e-05
CAALFM_C503950WA	-1.40892	5.15366	32.7243	2.40709e-05	0.000273756
CAALFM_C306540CA	-1.40762	1.39957	10.9689	0.00407873	0.0132856
SUT1	1.40682	6.94412	27.4332	4.55964e-05	0.000419751
SAM50	-1.4057	2.30614	30.5971	3.53444e-05	0.00034756
CAALFM_C111800CA	-1.40355	0.0595078	5.61258	0.0298105	0.0649209
GFA1	-1.40236	8.03781	80.9726	2.59833e-08	2.33705e-06
CSE4	-1.39903	2.54964	30.0957	3.87949e-05	0.000371649
CAALFM_C109340CA	-1.39696	6.64045	106.607	8.76416e-09	1.05854e-06
CAALFM_C106430CA	-1.3961	2.69263	26.0437	8.57219e-05	0.000676699
CAALFM_C209180WA	-1.39551	1.87885	29.9583	3.9805e-05	0.00037796
CAALFM_C107530WA	-1.39422	3.60875	10.2526	0.00517471	0.0159277
DCG1	-1.39413	1.50988	22.7429	0.000173627	0.00115988
CAALFM_C303510CA	-1.39381	5.14773	49.063	2.00718e-06	4.90948e-05
ABP2	-1.39241	1.29532	10.7941	0.00431983	0.0139282
MTLA1	-1.38869	3.70085	91.3034	2.74866e-08	2.40568e-06
CAALFM_CR03260WA	-1.38824	8.1918	34.1087	1.89162e-05	0.000234089
CAALFM_C111710CA	-1.38793	1.04334	19.8332	0.000341184	0.00193284
CAALFM_C111910WA	-1.38755	0.797154	16.9871	0.000699675	0.00335877
UGA1	1.38415	10.9624	12.3044	0.00232882	0.00867063
CAALFM_C302360CA	-1.38387	1.92523	18.6369	0.000457957	0.00241749
DPB4	-1.38218	2.14113	38.574	9.0817e-06	0.000142453
GOR1	-1.38151	5.33807	121.179	3.34606e-09	5.18125e-07
KAR2	-1.38027	8.44743	101.254	1.28504e-08	1.37396e-06
CAALFM_C301430WA	-1.37943	3.48476	31.8032	2.83663e-05	0.000306401
CAALFM_CR09040WA	-1.3788	5.29736	58.8668	2.92559e-07	1.25303e-05
HIR1	1.37822	6.08425	128.778	2.10762e-09	3.74351e-07
CAALFM_C603810WA	-1.37796	5.78821	27.8921	4.13879e-05	0.000389317
CAALFM_CR04620CA	-1.37561	-0.195376	6.38009	0.023139	0.0528219
NCE103	-1.37504	7.42644	41.2055	3.57583e-06	7.34388e-05
SPO22	-1.37502	1.90607	26.1282	8.42498e-05	0.000668721
CAALFM_C306670CA	-1.37493	2.46365	16.7978	0.000735581	0.00349228
CDC37	-1.37327	5.32678	46.5183	2.82683e-06	6.29935e-05
CRH11	-1.37317	5.15309	22.0598	0.000202489	0.00131064
CAALFM_C208580WA	-1.37127	0.98055	20.2924	0.000305554	0.00179498
CDC19	-1.36883	8.37693	35.607	9.28231e-06	0.000144847
CAALFM_C200760CA	-1.36812	8.98272	29.0023	3.28762e-05	0.000329253
PIR32	-1.36736	-0.63183	14.8225	0.00126371	0.00525228
GAL10	-1.36694	8.36834	31.7155	1.91565e-05	0.000235812
CAALFM_C503040WA	1.36647	2.81498	39.4811	7.88236e-06	0.000130697
SUA72	1.36533	3.97298	64.837	3.11758e-07	1.31658e-05
CAALFM_CR10310WA	-1.35911	-0.594305	6.27077	0.0226408	0.0518301
DAP1	1.35884	4.11202	33.0699	2.26508e-05	0.000263561
TEN1	-1.35879	1.65706	10.4979	0.00476578	0.0149743
AHP2	-1.35664	3.91641	50.8713	1.58641e-06	4.11174e-05
DPM1	-1.35611	4.19224	26.1173	8.44383e-05	0.00066919
WH11	-1.35582	10.0818	23.8339	0.000101092	0.000765989
CAALFM_C403050CA	-1.35406	7.25884	34.152	1.87764e-05	0.000233314
CAALFM_C702290WA	-1.35335	1.20997	24.398	0.000120979	0.000873915
RBT1	-1.35327	1.58457	24.3999	0.000120928	0.000873915
CAALFM_C203890WA	-1.35093	0.876258	12.2092	0.00274512	0.00985015
CAALFM_C501040WA	1.34928	1.24922	29.7734	4.12105e-05	0.000388253
CAALFM_C306560WA	-1.34597	8.60511	42.3537	2.97386e-06	6.50232e-05
SEC61	-1.34426	5.79194	13.36	0.00193295	0.00742019
CAALFM_C601130WA	-1.34362	-0.221905	8.31988	0.0102213	0.0273838
CAALFM_C104280CA	-1.34284	1.15823	14.874	0.00124545	0.00520502
SOL1	-1.34234	4.50551	70.9225	7.2454e-08	4.84056e-06
CAALFM_C303440CA	-1.34212	6.85795	26.4247	7.93054e-05	0.000639419
FGR41	-1.34192	2.66976	5.03395	0.0383243	0.0793691
CAALFM_C108900WA	-1.34102	1.83899	11.4369	0.00350461	0.0118353
HSP78	-1.34063	8.59839	25.1515	7.49392e-05	0.000609095
CAALFM_C102730WA	-1.33839	3.86927	24.474	0.000119031	0.000863978
MET10	1.33826	8.10087	96.3165	1.85826e-08	1.78128e-06
CAALFM_CR01510CA	1.33739	0.864004	8.71548	0.00812834	0.022694
BMT1	-1.33394	6.13755	26.7036	5.32959e-05	0.000471927
SNZ1	-1.33355	4.90383	20.2643	0.000307607	0.00180529
CAALFM_C208950WA	-1.33271	4.62759	31.362	3.07229e-05	0.000316568
CAALFM_C111610CA	1.33113	5.79041	55.564	8.86536e-07	2.65039e-05
SDH12	1.33003	8.71881	71.5664	6.76161e-08	4.73784e-06
CAALFM_C503940CA	1.32871	3.90481	38.6562	5.45602e-06	9.80356e-05
HXK2	-1.32622	8.41532	29.4295	3.01336e-05	0.000313439
CAALFM_C204070CA	-1.32546	6.99408	11.5096	0.003026	0.0106063
TRY5	1.32537	7.17384	18.839	0.000346107	0.00195706
CAALFM_C105540CA	-1.32511	7.18725	62.056	1.98176e-07	9.64587e-06
CAALFM_CR02880WA	-1.3249	2.38246	14.2688	0.0012576	0.00523159
DLD1	1.32328	6.42232	14.9732	0.00121107	0.00509741
CAALFM_C305330CA	-1.32293	0.553216	10.269	0.00514618	0.0158479
FGR51	-1.32012	4.67206	73.3356	1.32289e-07	7.46628e-06
SAP7	-1.31952	0.678846	19.1777	0.000400389	0.0021761
PIKA	-1.31447	4.63981	89.0016	3.31029e-08	2.81561e-06
EHT1	-1.31201	4.82937	33.8657	1.97239e-05	0.000241119
PUT2	1.31117	9.36362	9.96869	0.00514589	0.0158479
CAALFM_C602280WA	-1.31076	4.20268	101.129	1.29683e-08	1.37396e-06
SAM35	1.31003	4.21499	62.8352	3.86558e-07	1.53581e-05
PGA54	-1.30897	3.76275	24.4607	0.000119371	0.000865401
SAP99	-1.30866	2.56346	51.2532	1.51076e-06	3.96026e-05
CAALFM_CR08990CA	-1.30848	10.8706	23.1945	0.000117309	0.000855593
CAALFM_C600680CA	-1.30735	2.42786	43.6109	4.25459e-06	8.23509e-05
CAALFM_C110280CA	-1.30505	6.13737	69.6654	1.89562e-07	9.57301e-06
POL2	-1.30436	6.56967	99.6321	1.44804e-08	1.45745e-06
DPP1	-1.30398	1.35083	22.532	0.000182014	0.00120392
CAALFM_C206260WA	-1.30302	1.24595	27.4375	6.471e-05	0.000545787
CAALFM_C701700WA	-1.30149	8.3113	22.561	0.000180835	0.00119908
POT1	1.29873	8.73671	33.8288	1.28368e-05	0.000183017
CAALFM_C303370CA	-1.28993	7.5533	23.6348	0.000142635	0.000994659
CAALFM_C206570CA	-1.28887	5.93143	30.6296	3.51332e-05	0.000346682
CAALFM_C302750WA	-1.28808	3.37466	11.1381	0.00385982	0.0127165
PRA1	1.28726	6.02366	13.0197	0.00214083	0.00809042
CAALFM_C206930CA	-1.28694	1.49514	20.0649	0.000322653	0.00185748
RDN5	1.28465	4.01006	2.40603	0.137223	0.220396
ALP1	1.28113	5.55771	33.4446	2.12163e-05	0.000251223
KEL1	1.27976	7.33649	36.7833	1.20971e-05	0.000176887
CAALFM_C401950WA	1.27906	5.21646	34.2282	1.85327e-05	0.000231238
tR(ACG)2	1.27827	-0.460086	15.2824	0.00111055	0.00479044
CAALFM_C703830CA	-1.27688	2.13874	9.74428	0.00615406	0.0181201
CHR1	-1.27664	6.22203	32.5623	1.62842e-05	0.000212398
CAALFM_C600400CA	-1.27565	1.12214	13.6594	0.0017687	0.00691533
PRI2	-1.27526	0.639437	9.78681	0.00606455	0.0179177
VTC4	-1.27437	7.51102	63.7611	1.61943e-07	8.57873e-06
CAALFM_C406770WA	1.27407	6.25547	32.5701	1.62601e-05	0.000212398
CRC1	1.27234	6.08423	35.5229	1.48904e-05	0.00020253
FGR34	-1.27192	4.78936	90.5377	2.92273e-08	2.52148e-06
RFC5	-1.27187	4.68276	44.4467	2.14419e-06	5.11808e-05
CAALFM_C102100WA	-1.27032	2.07235	48.0256	2.30407e-06	5.41411e-05
CAALFM_C404400CA	-1.26917	1.84971	11.603	0.00332314	0.0113816
CAALFM_C301420CA	1.2675	6.80152	29.2779	3.10768e-05	0.000319171
MNN22	-1.26698	5.75324	24.5935	0.000116041	0.000847667
SMC1	-1.26679	4.69803	78.404	8.24193e-08	5.22693e-06
CAALFM_C207070WA	1.26671	7.25913	22.3264	0.000190631	0.00124997
PSF1	-1.26646	1.5293	19.158	0.000402331	0.00217908
MCD4	-1.26637	3.6994	31.8599	2.80789e-05	0.000304979
PHO113	-1.2656	2.69012	31.9893	2.74339e-05	0.000300633
CAALFM_C111990WA	-1.2645	1.00406	18.9603	0.000422495	0.00225992
PMT4	-1.26381	5.60728	28.5791	3.58688e-05	0.00035061
CAALFM_C112370WA	-1.26313	4.13935	36.0742	1.35883e-05	0.000190394
CAALFM_C209550CA	-1.26271	-0.122828	13.0157	0.00214345	0.00809526
HAP2	-1.26174	6.63092	40.6306	6.6092e-06	0.000114037
DYN1	-1.2601	8.23763	56.2517	4.07633e-07	1.59435e-05
CAALFM_C602990WA	-1.25846	3.90996	67.8287	2.2828e-07	1.06045e-05
AAT21	1.25751	8.5135	64.1399	3.35796e-07	1.38799e-05
CAALFM_CR03670WA	-1.25632	2.28616	16.9204	0.000712103	0.00339771
STN1	-1.25301	1.44953	23.7638	0.000138689	0.000970502
CAALFM_C602450WA	1.25181	5.10945	24.5136	0.000118032	0.000857754
CAALFM_C200510WA	-1.25095	3.95261	44.5758	3.70664e-06	7.51155e-05
CAALFM_C208090WA	-1.24962	4.00481	34.7507	1.69547e-05	0.000218314
CAALFM_C404490CA	-1.24911	1.30698	17.7981	0.000566546	0.00287028
tL(CAA)5	1.24859	-0.373489	9.73995	0.00616324	0.0181383
INN1	-1.24847	7.87091	29.0518	3.25451e-05	0.000328114
SOD5	-1.24211	3.17722	31.4886	3.00249e-05	0.000313439
HHT2	-1.2414	3.15549	4.3334	0.0510092	0.0996264
ARC18	-1.23827	1.47509	5.11109	0.0370418	0.0769772
ECE1	-1.23731	2.20947	5.99375	0.025387	0.0570392
CAALFM_CR09070CA	-1.2367	3.8142	17.1857	0.000540692	0.00276481
CAALFM_C401430CA	-1.23637	2.65876	31.3493	2.05684e-05	0.000246943
TUB4	-1.23579	1.69183	41.8254	5.52417e-06	9.86996e-05
CAALFM_C601870CA	1.23546	6.66994	21.2282	0.00018825	0.0012357
CAALFM_C201750CA	-1.23542	7.58127	24.7805	8.1451e-05	0.000653231
CAALFM_C110170WA	-1.23464	6.13501	17.2429	0.000654239	0.00319398
GCV2	-1.23446	7.91248	19.4552	0.000294659	0.00175344
CAALFM_CR09920WA	1.23309	10.8568	40.8022	3.8183e-06	7.66071e-05
CYT1	1.23271	7.55166	47.8038	1.29757e-06	3.46727e-05
CAALFM_C303570CA	-1.23055	3.80307	10.6859	0.00447697	0.0143277
CAALFM_CR05860WA	-1.22942	6.64234	28.8352	4.92571e-05	0.000442749
CAALFM_C111670WA	-1.2294	8.50336	28.8764	3.37368e-05	0.000336198
GCA1	-1.22744	5.51502	43.2994	4.45036e-06	8.55914e-05
CSK1	-1.22583	-0.698375	5.76119	0.0279886	0.0618385
CAALFM_C111920WA	-1.22287	2.37096	23.2401	0.000155517	0.00106845
CAALFM_C403870CA	-1.2228	0.340612	9.13447	0.00761609	0.0215124
CAALFM_C202050CA	-1.22216	3.04111	11.858	0.00306479	0.010717
ALT1	1.22136	7.61109	41.0699	6.18475e-06	0.000107947
CAALFM_C306700CA	-1.21925	9.32083	17.6678	0.000473673	0.0024874
CAALFM_C400850CA	-1.21788	2.28275	26.3502	8.0517e-05	0.000646598
PFK1	-1.21764	9.34158	25.5705	6.82688e-05	0.000567092
CAALFM_C209590CA	-1.2165	4.06998	18.2719	0.000502057	0.00260474
CCC1	1.21602	6.27578	27.5703	6.30299e-05	0.000535068
CAALFM_CR01640CA	-1.21456	2.32991	39.9654	7.31522e-06	0.000123398
PTP2	-1.2124	9.0421	15.1079	0.000978527	0.00437404
CAALFM_C110570CA	-1.20741	1.31788	22.4573	0.000185095	0.00121896
CAALFM_CR09050CA	-1.2071	2.25277	26.0759	8.51575e-05	0.000673667
CAALFM_C114470WA	1.20615	2.842	15.1976	0.00113714	0.00488238
FRE3	1.20608	4.14213	21.1295	0.000192893	0.00126206
AQY1	-1.20504	7.96092	58.8923	2.9163e-07	1.25303e-05
CAALFM_C101360CA	1.2045	6.86117	40.91	6.3356e-06	0.000109944
CAALFM_CR00340CA	-1.20414	2.58325	30.1067	2.62891e-05	0.000291838
CAALFM_C102800WA	-1.2031	3.66995	33.9177	1.26271e-05	0.000180699
CAALFM_C112760WA	-1.19857	4.71634	41.6319	5.68555e-06	0.000100985
CAALFM_C101910WA	-1.19728	6.57519	57.2722	7.24122e-07	2.28951e-05
CAALFM_CR10180WA	-1.19219	2.31447	43.2198	4.50198e-06	8.58225e-05
CAALFM_C112880CA	-1.19128	3.96474	36.6433	1.23763e-05	0.000178806
VPS28	-1.19104	4.2077	45.7586	3.13966e-06	6.77157e-05
OBPA	-1.19051	6.01459	45.8193	1.74052e-06	4.41639e-05
CFL1	-1.18994	5.15395	29.1925	3.16223e-05	0.000322036
CAALFM_C406790WA	1.18917	6.48915	26.0623	6.12639e-05	0.000524041
CAALFM_C104470CA	1.18795	5.31999	17.2681	0.000528526	0.00271178
CAALFM_CR09510CA	-1.1872	4.95411	35.981	1.37994e-05	0.000192458
CAALFM_C207540WA	1.18533	4.75978	78.3147	8.30908e-08	5.22693e-06
CAALFM_CR03730CA	-1.18508	7.04522	29.5411	2.94592e-05	0.000311566
SET3	1.18477	6.59084	15.1836	0.00114162	0.00489251
CAALFM_C301570WA	-1.18396	2.62738	13.2987	0.00196866	0.00752454
CAALFM_CR02100CA	-1.18373	3.72251	64.5086	1.48422e-07	8.09469e-06
CAALFM_C105160CA	-1.18336	9.28995	9.9958	0.0050966	0.0157434
tK(CUU)1	-1.18238	-0.280878	2.05278	0.172216	0.264256
HUT1	-1.18219	2.08135	34.1531	1.87727e-05	0.000233314
PRN4	-1.18205	4.50898	25.7053	9.19093e-05	0.00070977
OPT9	1.1801	0.385621	11.3036	0.0036583	0.0121933
CAALFM_C407220CA	1.17596	6.29792	39.8606	7.43396e-06	0.000124359
CAALFM_CR10140WA	1.17439	8.38712	52.3613	6.82795e-07	2.18169e-05
TYE7	-1.17276	9.86781	20.8696	0.000205749	0.00132324
PST2	-1.17262	2.76343	11.0864	0.00392524	0.0128829
AMO2	-1.17247	8.12058	18.6051	0.000368173	0.00204201
CAALFM_C603280WA	1.1724	1.74136	17.2731	0.000649098	0.00317658
CAALFM_C403690CA	-1.17224	1.52588	26.2283	8.2542e-05	0.000659353
SHM2	-1.17086	7.04513	27.4373	4.55564e-05	0.000419751
CAALFM_C504790CA	-1.1707	2.15657	37.3512	1.10341e-05	0.00016405
MMS21	-1.16934	3.03593	27.2385	6.73234e-05	0.000560781
CAALFM_C114190CA	-1.16912	5.84414	19.1709	0.00040106	0.0021761
CAALFM_C502380WA	-1.16901	7.83543	61.9629	4.25265e-07	1.62543e-05
RAD51	-1.16895	4.93829	42.482	5.01371e-06	9.28326e-05
CAALFM_C602400WA	-1.16851	1.21916	8.30181	0.0102896	0.0274828
CAALFM_C204340CA	-1.16791	0.229308	21.8962	0.000210174	0.00134739
CAALFM_C110310WA	-1.16207	5.46587	7.24612	0.0153413	0.0380476
CAALFM_C203290WA	1.16085	4.97583	26.6816	5.35497e-05	0.000473479
CAALFM_CR07110CA	-1.16013	2.7206	35.7873	8.98755e-06	0.000141343
CAALFM_C402720CA	-1.15987	8.27495	13.3055	0.00169233	0.00666692
CAALFM_C703410CA	-1.15935	2.40768	10.8895	0.00373246	0.0123848
ERD1	-1.15884	2.14398	19.0963	0.000408505	0.00220658
CAALFM_C208350CA	-1.15733	-0.625302	4.43095	0.0503174	0.0985621
EAF3	-1.15585	4.05613	39.4495	7.92104e-06	0.000130697
ZCF15	1.15583	6.5322	62.1543	1.95861e-07	9.61628e-06
CAALFM_C301100WA	-1.15477	0.220838	8.29088	0.0103311	0.027556
ASR2	-1.15107	7.61811	11.1832	0.00337729	0.0115093
CAALFM_C702420CA	1.1505	5.47177	83.783	5.12487e-08	3.82088e-06
CAALFM_C601560WA	-1.15039	3.73419	38.0395	9.88316e-06	0.000152256
CAALFM_C501090CA	-1.14997	4.76462	59.2895	5.73631e-07	1.94098e-05
CAALFM_CR05480WA	1.1498	6.17206	47.5153	2.46786e-06	5.68833e-05
CAALFM_C201860CA	-1.14692	1.21451	10.4203	0.00489113	0.0152491
SAP5	-1.14598	2.62833	16.0765	0.000892641	0.00408669
CAALFM_C207140WA	-1.14473	2.31187	38.849	8.69774e-06	0.00013859
GIN4	-1.14355	5.54068	67.9638	1.00191e-07	6.05054e-06
CAALFM_C206620WA	-1.14285	1.19309	19.4462	0.000374847	0.00206542
ARC19	-1.14137	1.98298	10.6075	0.00459496	0.014597
CAALFM_C109020WA	1.14052	6.49833	80.3746	6.90396e-08	4.73784e-06
CAALFM_C209910CA	-1.14051	0.359442	6.84725	0.0179432	0.0431193
MRV6	-1.1401	0.223186	8.57293	0.00931722	0.0253454
PGA59	-1.13912	9.70126	22.4102	0.000141259	0.0009862
PCK1	1.13888	11.8231	13.0328	0.00184403	0.00713854
RPP1	-1.13729	3.19457	26.7688	7.39702e-05	0.000604329
CAALFM_C208100WA	-1.13698	9.28423	16.7886	0.000603825	0.0030037
CAALFM_C603360CA	1.13668	4.6081	9.05503	0.00716393	0.0205427
RHO2	1.1358	3.75458	38.935	8.58143e-06	0.000138195
OFR1	-1.13568	4.91292	46.6226	2.78669e-06	6.23289e-05
CAALFM_CR04220CA	1.13427	3.64321	13.624	0.00178724	0.00697231
PGA19	-1.13405	0.92363	19.1482	0.000319146	0.00184257
ANT1	1.13214	6.89737	12.8875	0.00222833	0.00835312
PFK2	-1.13206	8.77241	25.636	6.72863e-05	0.000560781
CAALFM_CR10810CA	1.13102	6.3516	25.5093	9.57207e-05	0.000732646
CAALFM_C114090WA	-1.1308	5.0431	27.3037	6.64538e-05	0.000556608
ASR1	-1.13062	7.56325	7.71211	0.0119417	0.030951
CAALFM_C104460CA	1.13044	5.94655	58.0078	6.64652e-07	2.15798e-05
CAALFM_CR00810WA	-1.12827	3.12905	35.1409	1.58742e-05	0.000208854
CAS1	-1.12826	2.88954	35.9842	1.37919e-05	0.000192458
SIT1	-1.12674	9.98931	31.1526	2.13743e-05	0.000251617
CAALFM_C208960CA	-1.1266	4.82244	33.956	1.25379e-05	0.000180122
PGA53	-1.12623	4.42104	23.4743	0.000147723	0.0010254
CAALFM_C207550WA	1.12595	6.25515	88.1572	3.54755e-08	2.97078e-06
ACO2	1.12485	6.01441	40.8607	6.38292e-06	0.000110448
SPC3	-1.12451	2.74644	19.3933	0.000379733	0.00208853
HGT8	-1.12442	10.5031	14.4469	0.00119168	0.00503609
CAALFM_CR02690WA	-1.1231	2.45289	45.3612	3.31859e-06	7.00733e-05
CAALFM_C405360CA	-1.12105	1.21353	16.9798	0.000701035	0.00336263
CRZ2	1.12093	7.49531	19.0873	0.000324266	0.00186322
CAALFM_CR02770CA	-1.12031	2.68645	44.737	3.62306e-06	7.39177e-05
HYS2	-1.11993	4.39672	117.251	4.2926e-09	6.17215e-07
CAALFM_C207810WA	-1.11977	4.73444	98.1834	1.61334e-08	1.57768e-06
CAALFM_C109670CA	-1.11764	1.84418	28.3688	5.39002e-05	0.000475882
CAALFM_C210200WA	-1.11575	1.7617	12.8598	0.00224711	0.00840785
NDE1	-1.11567	7.96751	36.1733	1.33682e-05	0.000187746
SFC1	1.11403	6.72882	13.4405	0.0018872	0.007273
CAALFM_C109240CA	-1.11228	3.35328	24.1478	0.000127644	0.00091116
CAALFM_C104800CA	-1.11133	0.544906	19.6141	0.0003598	0.00201375
CAALFM_C703350CA	-1.11074	3.17513	26.2507	8.21658e-05	0.000657218
HPD1	1.11007	5.23344	20.5206	0.000289414	0.00173109
SNO1	-1.11002	3.56164	14.5606	0.00136148	0.00558179
CAALFM_C604240WA	-1.10591	2.04372	23.7456	0.000103175	0.000775931
FTR2	1.10413	5.34864	56.099	8.31664e-07	2.53802e-05
CAALFM_C600930CA	-1.10402	5.26607	25.9946	8.6589e-05	0.000680511
SDH2	1.10328	7.66965	72.1197	1.48785e-07	8.09469e-06
FTR1	-1.10297	6.50325	10.2033	0.00473623	0.0149358
RMS1	-1.10249	5.50287	24.2671	0.000124417	0.000892619
ALG11	-1.10212	4.75996	22.5123	0.000182822	0.00120756
CAALFM_C205600WA	-1.10184	4.72182	20.278	0.000238698	0.00149223
CAALFM_CR05310WA	-1.10161	2.27217	17.6978	0.000581375	0.00291989
DPM2	-1.10144	1.14629	11.6347	0.00328974	0.0113006
ALK2	-1.10103	8.34915	32.5517	2.48172e-05	0.00027974
CAALFM_C302720WA	-1.10088	4.86259	61.1681	4.64331e-07	1.72031e-05
CAALFM_C701690WA	-1.09917	3.21394	16.3537	0.000828209	0.00385607
CAALFM_C603880WA	-1.09881	2.228	25.2084	0.000101922	0.000770824
CCE1	-1.09881	1.09182	4.46774	0.0494721	0.0971584
CAALFM_CR04600WA	-1.09719	7.33786	34.3797	1.80588e-05	0.000229096
CAALFM_C113040CA	-1.09719	4.87768	21.3903	0.000180884	0.00119908
CAALFM_C202180WA	1.09707	4.34147	28.8501	4.91166e-05	0.000442709
CAALFM_CR03180WA	1.09698	4.45878	38.1127	9.76884e-06	0.000150892
EBP7	-1.09625	3.57805	29.9275	4.00352e-05	0.000378954
CAALFM_CR09930WA	-1.09603	4.94919	18.8605	0.000433102	0.00230644
CAALFM_C301020WA	-1.0953	4.77241	24.9125	0.000108461	0.000808636
HOL1	1.09448	3.14033	37.759	1.03351e-05	0.000156777
PRN3	-1.0943	5.82658	13.483	0.00186348	0.0072046
CAALFM_C200400CA	1.09397	6.47733	48.8453	1.11618e-06	3.13518e-05
AGA1	1.09391	4.38484	7.63639	0.0132025	0.0336271
CAALFM_C209160WA	-1.09365	3.29786	26.7952	7.35773e-05	0.000602078
MED15	1.09348	7.21798	71.7552	6.6266e-08	4.708e-06
CAALFM_C102290CA	-1.09331	2.83359	40.573	3.96414e-06	7.84899e-05
PRR2	-1.09311	3.95709	75.0326	1.12576e-07	6.66517e-06
CAALFM_C111270WA	-1.09294	9.5783	11.8194	0.00272983	0.00982483
GST1	1.09252	5.44534	5.98112	0.0255209	0.0572089
SCR1	-1.09166	13.6924	13.9427	0.00138903	0.00567456
CAALFM_C603110CA	-1.08961	1.91588	35.1581	1.58283e-05	0.000208705
PMM1	-1.08886	3.42946	11.1918	0.00379303	0.0125582
MMD1	-1.08736	4.0758	20.6869	0.000278253	0.00168938
CAALFM_C600180CA	-1.0872	1.42594	31.7523	2.8628e-05	0.000307624
CAALFM_C303380WA	-1.08647	4.95129	28.5266	3.62602e-05	0.000353713
CAALFM_CR07500WA	-1.08597	0.384626	7.5495	0.0136477	0.0344703
PLB1	-1.08594	0.568419	12.2813	0.00268419	0.00971228
CAALFM_C206990WA	1.08457	4.55898	16.2473	0.000703472	0.00337164
LIP7	-1.08448	1.50864	12.2494	0.00271097	0.00977405
CAALFM_C406220CA	-1.08425	-0.39472	8.64161	0.0090877	0.0248104
CDC20	-1.08414	3.4872	39.57	7.77465e-06	0.000129699
FIG1	-1.08306	-0.379318	6.88622	0.017668	0.0426278
DIE2	-1.08236	0.661923	18.3099	0.000497256	0.00258205
MOH1	-1.08168	6.59397	24.1738	9.34925e-05	0.000718322
CAALFM_C700920CA	-1.08105	2.74538	9.26832	0.0072643	0.0207463
CAALFM_C505230CA	1.08021	8.39458	46.1198	1.66384e-06	4.29398e-05
CAALFM_C208910CA	-1.07999	6.32868	34.0975	1.22144e-05	0.000177592
CAALFM_C106300WA	-1.07912	2.44723	13.0269	0.0021362	0.00808302
NDH51	1.07748	7.95435	54.5157	5.11373e-07	1.79744e-05
IME2	1.07706	3.37461	7.6634	0.0130674	0.0333675
FTH1	-1.07699	6.82687	48.5699	1.16126e-06	3.21877e-05
CAALFM_C206980WA	-1.07664	-0.0258433	7.79189	0.0124462	0.0320248
CPH1	1.07474	4.44006	65.1631	3.01178e-07	1.28085e-05
ARR3	1.07428	8.20722	9.61974	0.00583029	0.0173709
CAALFM_C304920CA	-1.07309	6.3138	41.8939	5.46831e-06	9.80356e-05
CAALFM_C505240CA	1.07265	1.45746	15.634	0.00100745	0.00446041
CAALFM_C704080CA	1.07083	0.635477	5.35206	0.0333423	0.0708719
PGA5	-1.06998	0.445896	15.9046	0.000775902	0.00365783
DAO1	1.06957	5.19295	52.7468	1.25124e-06	3.37333e-05
RIP1	1.06809	7.76732	49.1744	1.06483e-06	3.00491e-05
PEX1	1.06727	5.78135	34.3678	1.80955e-05	0.000229096
CAALFM_C110060CA	-1.06695	5.67268	9.85129	0.00593164	0.017568
FBA1	-1.06665	9.76345	24.0783	9.55612e-05	0.000732353
QCR9	1.06602	4.69472	57.9599	6.68354e-07	2.15839e-05
CAALFM_C302920WA	-1.0656	6.85386	25.5244	9.54206e-05	0.000732204
CAALFM_C701010WA	1.06544	1.461	27.4561	6.44721e-05	0.000545316
tR(CCU)1	-1.0653	0.216344	10.2109	0.00524805	0.0160961
CAALFM_CR10530WA	-1.06468	2.79157	21.2419	0.000244347	0.001515
FGR2	1.06257	0.330686	5.15789	0.036288	0.0757232
MRV4	-1.06079	2.23685	6.83018	0.0180652	0.0433265
CAALFM_C203170WA	-1.06032	2.81045	20.5616	0.000286613	0.00172582
CAALFM_C702430CA	1.05867	4.10935	73.4412	1.30956e-07	7.46078e-06
CAALFM_CR06630WA	-1.05861	4.17913	14.0113	0.0015953	0.00637591
CAALFM_C106660WA	-1.05848	7.5451	19.3607	0.000382773	0.00209951
CAALFM_C306400CA	-1.05732	3.91893	13.6863	0.00175472	0.00688102
CAALFM_C110360CA	-1.05604	9.16248	9.68427	0.00569642	0.0171063
CAALFM_C102890CA	1.05598	4.21586	31.6747	2.90314e-05	0.000310532
PXP2	1.05565	8.36735	14.9512	0.00102493	0.00452123
GLX3	-1.05552	8.28064	31.2511	3.13487e-05	0.00032033
CAALFM_C103840WA	-1.0555	0.235586	3.81142	0.0674084	0.124413
RFC3	-1.05498	3.44332	44.6684	3.65834e-06	7.43863e-05
CAALFM_C202670CA	-1.05321	1.8862	21.8743	0.000160724	0.00109644
CPA1	-1.05244	6.05049	15.3825	0.000902715	0.00411985
JEN1	1.05176	6.15334	5.34803	0.0334006	0.0709484
CAALFM_C501160CA	-1.05148	-0.526615	5.47626	0.031602	0.0680615
CAALFM_C306750WA	-1.05052	2.97661	11.782	0.00313931	0.0108893
CAALFM_C305820WA	-1.04972	1.08976	3.42189	0.0798164	0.142144
CUP1	-1.04964	6.17421	25.0839	0.000104619	0.000785811
CAALFM_CR01550CA	-1.04903	2.18824	19.3192	0.000386691	0.00211333
PIL1	-1.0489	8.00684	36.1742	8.38956e-06	0.000136024
CAALFM_C111050WA	1.04741	1.23061	13.6909	0.00175232	0.00687606
VRP1	1.04708	4.06674	22.8091	0.000128462	0.000914834
OYE2	1.04644	5.90307	33.9973	1.24426e-05	0.000179334
ARG3	-1.04498	4.93927	8.57611	0.00930643	0.0253339
CAALFM_C107850CA	-1.04456	1.69929	23.0566	0.00016194	0.00110007
CAALFM_C504470CA	-1.04422	8.97458	9.82022	0.00542549	0.0165477
CAALFM_C206610CA	-1.0434	-0.741462	2.77906	0.113641	0.188487
CAALFM_C601380CA	-1.04287	2.38702	8.43975	0.00978121	0.0263817
MSH6	-1.04228	4.1107	47.6141	2.43518e-06	5.6345e-05
CAALFM_C503080CA	1.04156	5.53507	11.1149	0.00388902	0.0128058
CAALFM_C202220CA	-1.04134	3.21241	15.2163	0.00113123	0.00486876
CAALFM_CR05470CA	-1.041	3.07533	11.8134	0.00310827	0.0108252
CAALFM_C110710CA	-1.03736	2.49054	35.1604	1.58221e-05	0.000208705
CAALFM_C302910WA	-1.03697	3.28473	32.4288	2.5364e-05	0.000285239
CAALFM_C403490CA	-1.03614	0.128121	10.078	0.00548974	0.0166345
CAALFM_CR01630CA	-1.03528	3.69393	33.0471	1.48563e-05	0.000202522
CAALFM_C500100CA	-1.03495	4.95536	15.4129	0.00107097	0.0046707
CAALFM_CR09100CA	-1.03471	6.8118	19.5858	0.000284882	0.00171869
CAALFM_C701570CA	1.03322	2.9462	16.8049	0.000734198	0.00348845
CAALFM_CR02570CA	-1.03273	5.25456	11.8056	0.00274234	0.00984787
CAALFM_C404760CA	-1.03197	4.91843	22.1665	0.000149767	0.0010372
PGA15	1.0315	2.36765	23.0708	0.000161433	0.00109807
CAALFM_C303470WA	1.02914	8.04063	5.85821	0.0255952	0.0573329
IFM3	-1.02857	5.06859	26.4934	7.82059e-05	0.000632242
REX3	-1.02767	3.9282	33.6795	2.03688e-05	0.000246391
CAALFM_C503690WA	1.02759	3.92414	31.8097	2.83332e-05	0.000306401
DUT1	-1.0261	1.93265	18.5831	0.000464182	0.00244607
PDX3	-1.0257	7.84206	36.5782	7.81157e-06	0.000129956
CAT2	1.02494	7.93001	16.4274	0.000811986	0.00378948
PSO2	-1.02416	3.97291	72.5459	1.42754e-07	7.98234e-06
HWP2	-1.02358	1.12697	11.618	0.00291852	0.010319
CAALFM_C106840CA	-1.02339	5.24669	15.9031	0.000935799	0.00423121
CAALFM_C604560WA	-1.02308	5.79315	42.6422	4.89732e-06	9.18475e-05
CAALFM_C110810WA	-1.02198	0.689523	13.3087	0.00196283	0.00751174
PDS5	-1.02153	5.57176	69.8712	1.85702e-07	9.57301e-06
CAALFM_C303760WA	1.02113	6.62062	36.9963	7.25943e-06	0.0001228
CAALFM_C113500CA	-1.02007	9.99287	28.8271	3.40802e-05	0.000339062
CAALFM_CR09830WA	-1.01954	5.58675	5.83053	0.0271824	0.0603065
CAS5	-1.01842	7.28603	31.7381	1.9073e-05	0.000235545
CAALFM_C500530WA	-1.01774	0.554962	16.4533	0.00080636	0.00377197
CAALFM_C208320CA	-1.0176	1.66848	7.30504	0.0149945	0.0373256
CAALFM_C209110CA	-1.01751	1.10538	22.7611	0.000172923	0.00115766
CAALFM_C204110WA	1.01707	3.95046	40.3945	6.85068e-06	0.000117199
ENO1	-1.01648	10.0122	17.8609	0.000449458	0.00238304
CAALFM_C400080CA	1.01614	6.91744	27.506	4.48982e-05	0.000416337
RFA2	-1.01595	3.89721	29.1436	3.19401e-05	0.000324724
CAALFM_C504480CA	-1.01515	1.94905	24.8463	0.000109986	0.00081671
CAALFM_C114520WA	1.01384	1.54563	11.0333	0.00399377	0.0130652
CCS1	1.01368	6.40133	32.7337	1.57628e-05	0.000208705
KIP3	-1.01346	4.54323	34.6341	1.72934e-05	0.000222202
ASE1	-1.01334	3.52191	50.7439	8.53316e-07	2.58954e-05
SST2	1.01091	3.96303	68.0963	2.22127e-07	1.03986e-05
CAALFM_C505350WA	-1.01064	3.71174	47.3533	2.52256e-06	5.77495e-05
YTH1	-1.01038	6.42049	38.9039	8.62327e-06	0.000138498
CAALFM_C400060WA	1.00962	3.61303	52.6479	1.26679e-06	3.40007e-05
CAALFM_C205810WA	1.00913	5.44188	126.446	2.42236e-09	4.06351e-07
CAALFM_C403200CA	-1.00866	2.76622	31.0914	3.22759e-05	0.00032687
CPR6	-1.00818	6.17178	46.2584	2.92977e-06	6.43376e-05
CAALFM_C702140WA	-1.00802	0.833604	16.2593	0.000849555	0.00392838
CAALFM_C501190WA	1.00773	3.61961	50.322	1.70276e-06	4.37573e-05
CCN1	-1.00738	2.88451	20.3017	0.000304875	0.0017941
CAALFM_C209850CA	-1.00725	1.08135	11.8006	0.0031209	0.0108441
CAALFM_C403460CA	-1.00701	4.68601	11.8454	0.00307703	0.0107453
TRM1	-1.00525	3.55714	51.232	1.51485e-06	3.96026e-05
GEF2	-1.00476	7.49189	13.3453	0.00194145	0.00743934
DFG10	-1.00441	3.0432	31.009	3.27661e-05	0.000329136
ARC35	-1.00282	3.76926	7.92031	0.0118584	0.0308278
CAALFM_C203880CA	-1.0018	2.4	31.7386	2.86983e-05	0.000307832
ATO6	-1.00028	4.7854	13.5292	0.00183812	0.00712519
RAD2	1.00017	5.64025	43.0343	4.6249e-06	8.75542e-05
YWP1	-1.00009	7.11525	8.0869	0.0103218	0.0275447
PGA61	0.999484	0.819284	11.1736	0.00381547	0.0126117
CAALFM_CR09230CA	-0.998897	4.22522	24.9664	0.000107236	0.000804472
CAALFM_C401580CA	-0.997677	2.89743	10.0004	0.00563668	0.0169606
ZCF11	0.996916	4.91367	56.3113	8.10945e-07	2.49862e-05
CAALFM_CR04410WA	-0.996244	1.48241	6.95009	0.0172273	0.0418655
TIP20	-0.99372	4.58392	44.3086	3.85004e-06	7.69881e-05
CAALFM_C201680CA	0.993603	6.87453	93.9925	2.22309e-08	2.06542e-06
CAALFM_C501980CA	-0.993359	3.88298	45.6388	3.19243e-06	6.84629e-05
CAALFM_C110130WA	-0.99317	7.84827	36.3888	8.07686e-06	0.000132905
CAALFM_C100810WA	-0.992845	1.95999	22.9401	0.000166175	0.0011195
HSP60	-0.992798	7.96511	15.2687	0.000933322	0.00423121
CDC28	-0.992444	3.04099	54.1059	1.05777e-06	3.00131e-05
ERG2	-0.992151	2.42855	19.4174	0.000297555	0.0017669
SRB8	-0.991918	6.60937	45.6032	3.20831e-06	6.84629e-05
CAALFM_C405040WA	-0.990847	0.0820544	3.46706	0.0798098	0.142144
CAALFM_C401840CA	-0.990567	4.23925	11.7507	0.00317067	0.0109729
LYS4	0.990353	5.0014	35.6012	1.46973e-05	0.000201721
CAALFM_C403170WA	-0.990162	3.04874	53.3305	1.16368e-06	3.21877e-05
ALG6	-0.989557	3.42274	20.5324	0.000288603	0.00173076
CAALFM_C104710CA	-0.98949	3.25502	30.6833	2.34413e-05	0.000268619
MON2	-0.989282	4.99101	69.1486	1.99658e-07	9.64587e-06
CAALFM_C402600CA	-0.987722	2.44598	13.9745	0.00137559	0.00563583
ECM331	-0.987217	3.93255	15.2973	0.00110596	0.00478772
CAALFM_C200690WA	-0.985896	3.99952	47.737	2.39515e-06	5.58467e-05
GPM1	-0.984752	8.28834	18.8272	0.000347184	0.00195948
CAALFM_C306350WA	0.983569	5.2032	17.4254	0.000623845	0.00307543
CAALFM_C114450CA	0.983358	6.2382	42.3173	5.13657e-06	9.39992e-05
ADE13	-0.983268	6.21285	23.7953	0.000137744	0.000966125
MDH1	0.982773	8.28276	16.3075	0.000691534	0.00333337
FOX2	0.98258	9.76789	19.3824	0.00030027	0.00177672
PGA33	0.981681	4.5622	69.0294	2.02071e-07	9.68495e-06
CAALFM_C302980CA	-0.981403	3.36098	40.5065	6.73494e-06	0.000115546
CAALFM_C207640WA	-0.981034	7.50148	32.6128	1.61286e-05	0.00021174
OP4	0.980962	7.10864	3.25399	0.0869899	0.151664
CAT1	0.980651	12.0753	16.5199	0.000651188	0.00318423
RFC2	-0.979502	3.24328	36.175	1.33644e-05	0.000187746
CAALFM_CR10200WA	-0.978478	2.50659	20.1035	0.000319682	0.0018439
CDA2	-0.978067	1.6943	20.2413	0.000309301	0.00181347
CAALFM_CR07230WA	0.977906	0.754311	10.634	0.00407554	0.0132823
CAALFM_C204740CA	-0.977856	1.14694	5.47868	0.0315691	0.068015
tS(AGA)4	-0.977667	0.154043	7.89544	0.0119697	0.030997
CAALFM_C602660CA	-0.977622	2.9458	21.7195	0.00021884	0.00139554
CAALFM_C111620WA	0.977529	2.94495	21.2689	0.000186367	0.001226
CAALFM_C502680WA	-0.976875	5.63549	20.8071	0.000270484	0.00165496
CAALFM_C113810WA	-0.976711	4.88666	31.1726	2.12908e-05	0.000251223
CAALFM_CR07120CA	-0.976287	2.64312	31.0635	3.2441e-05	0.00032761
CAALFM_C200170CA	0.975559	5.86055	59.2148	5.78534e-07	1.94098e-05
SEC13	-0.975151	4.99648	12.7342	0.00233478	0.00868747
CAALFM_C300400CA	0.975087	6.35161	25.5027	9.58533e-05	0.000732732
EHD3	0.975021	7.73129	44.1439	3.94154e-06	7.82992e-05
CAALFM_C303690WA	-0.974862	2.82469	24.803	0.000110999	0.000822482
OPI1	0.972379	6.45879	18.147	0.000416068	0.00223467
BET4	-0.971886	1.2827	5.23434	0.0350939	0.0737925
RIC1	-0.971598	2.57294	20.3344	0.000235315	0.00148028
TUS1	-0.971006	8.39327	26.7523	5.27402e-05	0.000467691
TEP1	-0.970044	1.18608	10.096	0.00545626	0.0165967
CAALFM_CR08280WA	-0.96947	4.49899	43.1723	4.53312e-06	8.60865e-05
CAALFM_C305150WA	0.969281	5.14669	57.4585	7.08515e-07	2.25196e-05
CAALFM_CR06960WA	-0.969212	3.79923	16.3051	0.000692008	0.00333337
HGT16	0.968958	5.43345	27.9558	5.8423e-05	0.000504744
CAALFM_C102220CA	-0.968468	4.18919	42.2269	5.20548e-06	9.49725e-05
CAALFM_CR01440CA	-0.967468	5.80144	14.8633	0.00105202	0.00462384
PEX6	0.967381	5.42032	9.53296	0.00662146	0.0191876
RPS42	0.967364	7.40962	23.9145	9.92284e-05	0.000753761
BGL22	0.964636	6.01527	40.9478	6.29956e-06	0.000109634
PGA34	-0.963696	-0.645939	4.93718	0.0385149	0.0796545
CAALFM_C111200WA	-0.963556	11.0545	5.60204	0.0286122	0.0628781
CAALFM_C602790CA	-0.962935	7.7151	30.0905	3.88327e-05	0.000371649
CAALFM_C200280CA	0.962257	3.89756	46.3745	2.88328e-06	6.35479e-05
CAALFM_C204370WA	-0.960749	4.63442	6.80197	0.0182691	0.0436766
tP(UGG)4	0.959863	-0.559379	2.13208	0.162303	0.252485
TLO7	0.958773	0.266604	7.10455	0.0162123	0.039864
ALG5	-0.95746	1.56662	11.0315	0.00355578	0.0119524
HEM2	0.957179	5.43164	61.4841	4.48337e-07	1.67639e-05
SNM1	-0.956054	4.50843	41.5987	5.71374e-06	0.000101189
CAALFM_C101220CA	0.955062	5.16756	59.6482	5.50717e-07	1.88965e-05
CAALFM_C301070CA	-0.954666	2.74605	8.95845	0.00810833	0.0226486
CAALFM_CR08130WA	0.954646	3.16315	39.1419	5.0267e-06	9.28326e-05
BET2	-0.953907	2.85547	18.6845	0.000452542	0.00239518
CAALFM_C111570WA	0.952542	2.52977	53.0307	1.20777e-06	3.28546e-05
SUR7	-0.951616	8.55182	31.907	1.8461e-05	0.000230819
CAALFM_C111260CA	0.951151	3.01578	15.1109	0.0011651	0.00495496
CAALFM_CR04730WA	-0.950221	4.82502	22.0872	0.000201233	0.00130531
CAALFM_C104110WA	-0.948429	3.26325	19.9138	0.000334606	0.00190761
CAN3	-0.947591	5.44618	17.9691	0.000542262	0.00277049
CAALFM_C304940WA	-0.946607	6.1391	56.573	7.86203e-07	2.43481e-05
SWI4	-0.946368	6.3508	32.3588	1.6928e-05	0.000218314
PPT1	-0.946354	5.15367	20.364	0.000300386	0.00177672
ATP7	-0.946314	5.43495	17.5511	0.000489011	0.00254801
CAALFM_C602250WA	-0.945954	2.83297	11.2659	0.00370312	0.0123077
CAALFM_C209240CA	-0.94544	2.01807	5.07153	0.0362343	0.0756636
CTP1	-0.945211	4.31271	46.0431	3.01819e-06	6.55642e-05
PGA45	0.943902	5.75533	5.51798	0.0310409	0.0670444
ARP1	-0.943507	1.31435	18.4749	0.000476971	0.0024982
PGA28	-0.9432	0.16776	8.75959	0.00870818	0.0239257
EBP1	0.942278	6.24606	13.6584	0.0017692	0.00691533
ALG2	-0.942121	3.42497	31.3996	3.05138e-05	0.000315536
CAALFM_C108730WA	-0.942024	4.62825	11.3671	0.0035841	0.0120077
RNH35	-0.937844	2.28994	28.3236	5.4375e-05	0.000478674
SAS2	-0.937761	2.54724	39.267	8.14857e-06	0.000133721
CAALFM_C603090WA	-0.937666	-0.459439	7.35827	0.0146889	0.0366858
CAALFM_C101750WA	0.937058	4.83198	45.1378	3.42411e-06	7.20496e-05
HOS1	0.935557	2.83146	33.6476	2.04816e-05	0.000246391
CAALFM_C702610CA	-0.933581	8.14445	29.729	2.83618e-05	0.000306401
CAALFM_C102650WA	0.932983	6.09091	66.2501	2.68704e-07	1.17501e-05
HAT1	-0.932447	3.13169	34.934	1.64373e-05	0.000213932
CAALFM_C701440WA	-0.930168	4.49217	4.86169	0.0398677	0.0817802
SWI6	-0.92965	4.7357	39.4525	7.9173e-06	0.000130697
MET6	0.928909	8.8876	7.53158	0.0128222	0.0328107
TPO3	-0.928774	6.80877	7.74475	0.0117899	0.030676
PHO15	-0.927994	4.28796	27.0224	7.02937e-05	0.00057919
CAALFM_C702600CA	-0.927682	10.0185	15.4093	0.000895676	0.00409462
CAALFM_C700910CA	-0.92764	3.49432	46.7712	2.73057e-06	6.13009e-05
RAD6	0.927271	4.58355	29.4704	4.36366e-05	0.000407928
FRE7	0.92585	7.71798	23.3923	0.000112003	0.000828907
tS(AGA)2	-0.924637	0.211297	6.77077	0.0174271	0.0421643
PMI1	-0.924521	3.92079	53.4894	1.14104e-06	3.19017e-05
CAALFM_C600940CA	-0.924459	1.08524	11.4511	0.00348862	0.0117961
CYB5	0.924426	5.68006	28.656	5.0986e-05	0.000454808
BUB3	-0.923962	7.15742	29.4761	2.98497e-05	0.000313439
CAALFM_CR10040WA	-0.923789	2.29756	27.9365	5.86446e-05	0.000505935
PRC2	-0.923402	6.9781	20.2641	0.00023954	0.00149595
PDR17	-0.922366	4.58065	25.4054	9.78124e-05	0.00074582
ZCF13	0.92208	6.99885	36.3996	1.288e-05	0.000183017
CAALFM_C208540CA	-0.920606	1.38749	14.9625	0.00102149	0.00450935
CAALFM_C105830WA	-0.920207	0.294095	5.11177	0.0370308	0.0769772
CAALFM_C500810CA	-0.919611	-0.19268	10.1181	0.00541547	0.0165255
MHP1	-0.919403	8.64371	27.1792	4.8128e-05	0.000436404
CAALFM_C103540CA	-0.919298	2.82238	35.394	1.52145e-05	0.000204462
CAALFM_C600630WA	-0.919094	1.46408	14.0584	0.00157356	0.00630156
MNT4	0.917948	3.01965	14.5924	0.00134917	0.00554262
CAALFM_C405400CA	-0.917849	8.30755	18.8091	0.000348838	0.00196189
CAALFM_C602210WA	0.917612	2.49465	9.23779	0.00734291	0.0209268
CAALFM_C302690CA	-0.916413	5.53876	24.6382	0.000114944	0.00084489
CAALFM_C102210WA	-0.916366	5.76118	29.1042	3.21979e-05	0.000326795
CAALFM_C107860WA	-0.915518	0.63623	14.5621	0.00136091	0.00558179
CAALFM_C210650WA	-0.914851	2.49743	19.911	0.000334835	0.00190761
MEP2	0.914646	4.31563	38.6906	8.91664e-06	0.000140594
ERG4	-0.914612	5.6217	35.9025	8.80481e-06	0.000139683
SEN15	-0.914232	1.69842	10.6428	0.00454147	0.0144804
QCR2	0.914223	7.33437	47.9385	2.33116e-06	5.45654e-05
CAALFM_C105890WA	0.914116	3.87567	3.31391	0.0861736	0.150657
SAM37	0.914111	0.748272	9.20631	0.00742494	0.021081
CRL1	-0.913855	6.1619	26.3529	8.0472e-05	0.000646598
RAS2	-0.913816	6.49828	19.5191	0.000368231	0.00204201
CAALFM_C403020WA	0.913581	6.98456	22.7558	0.000130095	0.000924289
GPI7	0.913109	4.64345	27.0531	4.94416e-05	0.000443652
PGA48	-0.912319	3.9181	15.6866	0.000992974	0.00442044
PGA57	-0.911543	2.70542	20.8143	0.000270024	0.00165383
CAALFM_C206430CA	-0.911178	3.88465	14.8657	0.00124838	0.00521005
CAALFM_CR08670CA	0.911065	4.27388	32.8175	2.36785e-05	0.000270823
NOP1	0.910328	5.86211	16.1112	0.00088427	0.00405167
SIZ1	0.909712	7.45297	66.6815	2.56915e-07	1.14081e-05
CAALFM_C107660WA	-0.90965	4.62404	9.79671	0.00604393	0.0178655
CAALFM_C210850CA	0.909131	5.53815	35.3592	1.53033e-05	0.000204462
SSN6	0.909068	8.5063	32.3516	1.69513e-05	0.000218314
CAALFM_C702000CA	-0.908719	0.696713	7.65057	0.0131314	0.0334742
MDM34	-0.908132	9.42035	17.901	0.000444609	0.00236147
DOS2	-0.907946	3.42054	26.4883	5.58355e-05	0.000489391
PHO112	-0.907685	1.50053	13.7771	0.00170846	0.00672144
CTA4	0.907191	10.418	13.9593	0.001382	0.0056544
VRG4	-0.906823	5.34556	11.3795	0.00356984	0.0119702
CAALFM_C201910WA	-0.906722	2.01455	19.5912	0.000361812	0.00201939
RDN25	-0.905675	18.4264	1.96196	0.177285	0.271029
NAG3	-0.905269	2.88239	15.056	0.0011832	0.00500376
CAALFM_C406290WA	-0.904733	0.507737	11.0647	0.00395308	0.0129391
CAALFM_CR04680CA	0.904446	0.346285	3.23454	0.0878684	0.152966
CAALFM_C109300CA	-0.903142	1.17164	14.0968	0.00155612	0.00624202
CAALFM_C407150WA	0.902708	2.74374	12.7283	0.00203151	0.00772077
TVP18	-0.902449	3.30534	20.1573	0.00031558	0.00183249
NUC2	0.900496	7.14903	59.6625	5.49821e-07	1.88965e-05
PPH3	-0.898585	2.50428	29.3673	4.44976e-05	0.000414054
CHS2	-0.898282	7.23439	23.5544	0.000107853	0.000806091
MNN12	-0.89823	4.9531	18.0507	0.000531084	0.0027226
TIP41	-0.897859	4.10081	67.6216	2.33176e-07	1.06678e-05
CAALFM_C105190CA	0.896333	3.34987	15.2915	0.00110773	0.00478855
CAALFM_C701960WA	0.89602	5.27368	35.6605	9.19367e-06	0.000143836
CAALFM_C400700CA	-0.895862	4.69851	15.1925	0.00113878	0.00488429
MET16	0.894229	4.69829	25.7078	9.18615e-05	0.00070977
CAALFM_CR00710CA	-0.893784	0.836183	6.97658	0.0170483	0.0414972
CAALFM_C401310WA	-0.893431	1.64788	27.5824	6.28803e-05	0.000535068
ACO1	0.893424	11.0638	15.0324	0.00100057	0.00444514
RIM15	0.893291	8.71543	39.7978	4.50501e-06	8.58225e-05
CAALFM_C404200CA	0.892724	5.26535	8.22866	0.00977461	0.0263757
PDC2	0.892597	6.18966	20.4813	0.000292125	0.00174323
CAALFM_C302710WA	-0.892553	7.90566	10.2163	0.00471459	0.0148753
CLN3	-0.892398	7.3217	31.7111	1.91727e-05	0.000235812
SUL2	0.891713	4.84268	12.7797	0.00230262	0.00858364
URA1	-0.891364	5.9085	35.111	1.01496e-05	0.000155174
GNP3	0.889503	8.0182	8.72877	0.00808797	0.0226021
CAALFM_C208450WA	0.888177	7.63713	33.0721	1.47865e-05	0.000202259
SWE1	-0.887672	5.19314	19.7414	0.000348848	0.00196189
CAALFM_C210540WA	0.887227	5.7343	36.8802	7.40829e-06	0.000124274
CAALFM_C306040WA	0.886586	3.60463	11.976	0.00295291	0.0104041
CAALFM_C300850CA	-0.885959	7.98329	21.2308	0.000188128	0.0012357
FGR46	0.88559	1.74105	6.71629	0.0178224	0.0429316
XUT1	0.885323	5.26042	50.2665	1.71504e-06	4.3886e-05
HGT13	-0.884788	2.64228	9.77036	0.00609899	0.0179931
CAALFM_CR10800CA	0.884766	6.2781	20.987	0.000259305	0.00159464
TEM1	-0.884237	0.779741	13.6386	0.00177957	0.00695043
PLB5	-0.883872	4.64735	9.54012	0.00660499	0.0191583
ALK8	-0.883836	6.17654	7.04903	0.0155559	0.0384222
ALD6	0.883534	8.6314	6.40908	0.0202494	0.0474161
CAALFM_C300210CA	-0.880952	3.4036	22.9756	0.000164873	0.00111497
CAALFM_CR09580CA	-0.880635	5.4238	25.8232	6.45639e-05	0.000545316
CAALFM_C400710WA	-0.880534	4.63105	59.9488	5.32297e-07	1.84744e-05
CAALFM_C602740WA	0.880187	4.69597	43.7691	4.15886e-06	8.12795e-05
CAALFM_CR02670CA	0.879963	5.11666	61.136	2.21385e-07	1.03986e-05
CAALFM_C504360CA	-0.879845	4.81857	24.2656	0.000124455	0.000892619
CAALFM_CR03190CA	-0.879353	10.6955	19.3337	0.00030409	0.00179336
TRP3	-0.879242	4.34988	67.266	2.41854e-07	1.09816e-05
CAALFM_C701050WA	-0.87922	0.612095	6.88266	0.017693	0.0426709
ERG24	-0.877122	2.53588	16.0255	0.000905093	0.00412517
ZCF17	0.875056	6.71174	17.3554	0.000635315	0.00312088
NAR1	0.874857	7.2088	13.0545	0.00183141	0.00711245
CAALFM_C203210WA	-0.874646	3.1769	43.8172	4.13025e-06	8.09868e-05
CAALFM_C703030WA	-0.87423	4.33705	20.2311	0.000310058	0.00181614
CAALFM_C703210WA	-0.873804	3.79221	34.3082	1.82809e-05	0.000229997
MED18	-0.873792	2.78353	32.9146	2.32772e-05	0.000267754
CAALFM_C700680WA	-0.873095	-0.0595064	6.84597	0.0179524	0.0431242
CAALFM_C108050WA	0.873043	5.64269	53.055	1.20413e-06	3.28546e-05
CAALFM_CR04710WA	-0.872874	0.759943	7.11098	0.0151708	0.0376868
CAALFM_C207020CA	0.872791	3.5128	46.4852	2.83974e-06	6.30484e-05
CAALFM_CR06270WA	0.872391	2.16811	33.4844	2.107e-05	0.000249984
CAALFM_C106120CA	-0.871047	0.874272	10.2858	0.00511699	0.0157902
CAALFM_C204280WA	0.870716	6.79517	41.1377	6.12206e-06	0.000107163
CAK1	-0.870337	3.05597	12.7184	0.00234605	0.00871864
SCW4	0.869752	5.23185	3.7223	0.0686282	0.126278
LEU1	0.868417	7.48236	40.9425	3.73195e-06	7.53754e-05
PGA39	-0.867183	0.861299	11.4879	0.00344772	0.0116839
OSH3	0.866767	5.51275	18.9303	0.000425648	0.00227477
GIN1	-0.866728	3.01077	42.3716	5.09574e-06	9.35355e-05
CAALFM_C101860WA	0.866356	5.6771	64.0827	3.37861e-07	1.38799e-05
COG4	-0.866277	3.67415	29.4342	4.39363e-05	0.000410095
CAALFM_CR09590WA	-0.865308	3.34941	13.2154	0.00201838	0.0076757
IFR1	0.864757	5.00548	11.5738	0.00335424	0.0114572
CAALFM_C109700WA	-0.864484	0.258016	3.46489	0.0798957	0.142244
NRP1	0.863998	6.22354	44.8752	2.00802e-06	4.90948e-05
CAALFM_C111080WA	-0.863283	8.32064	9.71492	0.00563405	0.0169606
MED20	-0.862455	2.20893	31.5735	2.9567e-05	0.000311615
CAALFM_C106250WA	-0.862238	2.79775	21.359	0.000237795	0.00149141
CAALFM_C207740WA	0.860789	7.47285	14.5848	0.00114326	0.00489311
MSH2	-0.860381	5.04802	25.6449	6.71543e-05	0.000560781
CAALFM_C307670WA	-0.859541	5.71627	44.8069	3.58742e-06	7.34388e-05
SRB1	-0.85839	7.21885	39.8397	4.47378e-06	8.57687e-05
CAALFM_C703310WA	0.85776	5.0536	4.64192	0.0456862	0.0909956
HNT1	0.857399	5.19447	14.8008	0.00127152	0.00527595
IFA21	-0.857362	4.67065	31.9699	2.75294e-05	0.000300633
SOG2	0.856393	6.73564	77.7734	8.72944e-08	5.3793e-06
CAALFM_CR03320CA	0.854425	-1.45634	0.428501	0.522528	0.62747
UCF1	-0.854407	10.6061	12.1842	0.00242172	0.00893389
CAALFM_C303210WA	-0.852561	4.81837	12.0561	0.00287964	0.0102055
CAALFM_C700330CA	-0.851881	4.09437	20.2842	0.000238326	0.00149145
CAALFM_C201540WA	0.851582	6.5435	3.60345	0.0746025	0.134847
CAALFM_C112570CA	-0.85082	5.81708	35.4891	1.49746e-05	0.000202762
CAALFM_C701100CA	-0.850259	3.47022	38.8871	8.64609e-06	0.000138498
CAALFM_CR07850WA	0.84913	4.85438	41.6344	5.68345e-06	0.000100985
CAALFM_CR04560CA	-0.849102	2.89494	28.1175	5.6603e-05	0.000493879
CAALFM_C204960CA	-0.849059	3.301	10.2879	0.00511339	0.0157872
CAALFM_C401730CA	-0.848762	4.61474	55.4946	4.49702e-07	1.67639e-05
CAALFM_C111010CA	0.848725	4.0797	19.3755	0.00038139	0.00209383
CAALFM_C204490WA	-0.848677	4.82417	27.4262	6.48555e-05	0.000546252
CAALFM_C503840WA	-0.848216	1.71837	11.9073	0.00301748	0.0105945
CAALFM_C107920WA	0.847751	2.0481	16.1264	0.000880646	0.00404015
CAALFM_C102970WA	-0.847197	5.36538	58.9814	5.94168e-07	1.97153e-05
CAALFM_C208920WA	-0.847029	8.73464	16.7325	0.000613391	0.00304377
CAALFM_C106720CA	-0.846792	2.66909	18.4557	0.000479283	0.00250597
CAALFM_CR03440WA	0.845233	1.82161	16.307	0.000838697	0.00389202
CAALFM_CR07220CA	-0.844816	2.75119	27.7507	6.08261e-05	0.000521033
CAALFM_C701990CA	0.84466	4.42532	75.903	1.03755e-07	6.20375e-06
CAALFM_C108770WA	0.843986	5.64207	9.87389	0.00588582	0.0174671
CDC5	-0.843389	3.70201	13.9136	0.00140152	0.00571877
CAALFM_C105180CA	0.842595	3.78071	37.7958	1.02746e-05	0.000156292
RBR2	0.842506	4.29722	16.8206	0.000731152	0.00347671
CAALFM_CR01790CA	0.842477	5.60744	53.05	1.20488e-06	3.28546e-05
PGA17	0.842442	4.79377	4.1207	0.0581521	0.110782
ARP9	-0.842084	4.06707	19.2386	0.000394422	0.0021478
ERV25	-0.841944	4.42516	8.30584	0.0102743	0.0274784
CAALFM_C205760CA	0.841747	5.34136	29.0122	3.28101e-05	0.000329136
CSM3	-0.840964	2.51324	24.6433	0.000114821	0.00084489
CAALFM_C209560CA	-0.840707	3.62713	24.6497	0.000114663	0.00084489
SET1	0.840576	5.70411	61.8281	4.31621e-07	1.63935e-05
CAALFM_C305640WA	-0.840344	0.336147	6.82516	0.0181013	0.0433446
CAALFM_C109770WA	0.84018	4.08074	11.0299	0.0035577	0.0119524
DDC1	-0.840066	3.53596	19.1981	0.000315011	0.00183249
CAALFM_C307130WA	-0.839856	2.21037	4.48748	0.0490254	0.0965637
CAALFM_C112280CA	-0.839384	1.51323	4.31955	0.052981	0.102812
CAALFM_C303190CA	0.838937	5.01631	26.9569	7.1224e-05	0.000584119
CCP1	0.838729	7.27034	16.9453	0.000707429	0.00338523
CRG1	-0.838175	4.60508	9.51943	0.00665273	0.0192576
RFC4	-0.837878	2.98812	30.3614	3.69218e-05	0.000357325
CAALFM_C208390WA	-0.837858	6.20305	14.4161	0.00141902	0.0057707
CAALFM_CR02410WA	0.837006	4.85699	35.2116	1.56868e-05	0.000208446
PLB3	-0.836436	9.56477	21.007	0.000198838	0.00129116
CAALFM_C305080WA	-0.836144	2.21609	10.626	0.00456684	0.014536
CAALFM_CR08440WA	0.834708	4.0163	20.1243	0.000318086	0.0018382
CAALFM_C701460CA	-0.83449	2.92216	18.2336	0.000506953	0.00262563
CAALFM_C303070WA	0.833339	6.03047	37.6296	1.05514e-05	0.000158902
CAALFM_C301720CA	-0.832717	7.52148	18.139	0.000519272	0.00267567
DUR7	0.83178	3.95761	30.9411	3.31762e-05	0.000331707
CAALFM_C502510CA	0.831685	6.26222	28.0963	5.68382e-05	0.000493879
FRE30	0.831252	7.12869	19.7022	0.000276465	0.00168134
CAALFM_C602560WA	-0.830935	4.78934	24.7117	0.000113165	0.000836476
CAALFM_CR09530CA	-0.830643	7.10153	11.3264	0.0032178	0.0111105
PRX1	-0.830162	8.05512	13.5931	0.00180364	0.00701815
CAALFM_C301060WA	0.828795	2.29363	10.7657	0.00436043	0.0140196
FGR12	-0.828775	-0.823673	2.53392	0.129667	0.21067
YMC2	0.828677	3.08979	9.803	0.00603087	0.0178444
CAALFM_C203260WA	-0.828532	2.93736	21.3578	0.000237864	0.00149141
CAALFM_C700880CA	0.828465	7.74733	14.6825	0.00111029	0.00479044
BOI2	0.828269	8.03829	41.3196	5.95713e-06	0.000104579
CAALFM_C502900WA	0.828191	3.13786	23.9675	0.000132703	0.000938901
PGA18	-0.828014	4.76035	19.4692	0.000372741	0.00205569
CMK1	-0.826621	6.95351	7.75277	0.0126317	0.0324193
CAALFM_C302010CA	-0.826565	1.02379	4.42961	0.0503486	0.0985912
CAALFM_C502220CA	0.825276	3.18099	23.9103	0.000134354	0.000946745
ENA2	0.824331	10.4559	8.09595	0.0102859	0.0274828
CAALFM_C601960WA	-0.824099	3.61615	22.1054	0.000151987	0.00104897
CAALFM_CR00310CA	-0.823854	7.10537	8.10528	0.0110663	0.0291321
CAALFM_C500850CA	0.823101	1.2665	8.09393	0.0111131	0.0292206
MNN11	-0.823089	3.75022	5.96784	0.0244153	0.0553884
CAALFM_CR01920WA	-0.822917	0.243692	13.0394	0.00212819	0.00805981
GPX1	0.820531	2.32375	8.12149	0.0109998	0.0289697
PEP7	0.820159	4.47682	49.9819	1.77956e-06	4.47782e-05
ERP5	-0.819981	4.27457	19.9652	0.00033049	0.00188999
DUO1	-0.819907	1.0854	10.0927	0.00492467	0.0153378
CAALFM_CR07460CA	-0.8199	3.59223	22.9402	0.000166174	0.0011195
SPT5	0.819315	6.15716	22.9372	0.000166285	0.0011195
CAALFM_C112840WA	-0.819041	2.04183	14.7723	0.00128185	0.00530575
YKE2	-0.818786	4.63152	13.669	0.00176368	0.00690717
CAALFM_C702860CA	0.818569	7.90591	31.3053	2.07456e-05	0.000247594
CAALFM_C307240WA	-0.818497	0.922601	6.72111	0.0188679	0.0449302
CAALFM_CR06430WA	-0.818291	0.698406	14.1186	0.0015463	0.00620885
PIN4	0.818146	5.95096	33.3502	1.40343e-05	0.000195284
CDC45	-0.817613	4.27791	30.6352	3.5097e-05	0.000346682
PGA25	0.817567	6.39735	12.1337	0.00281053	0.0100134
CAALFM_C107650WA	0.817041	3.8784	10.4724	0.00480662	0.0150556
LEU5	0.816642	5.86989	50.6323	8.66715e-07	2.61705e-05
GZF3	0.816532	7.76149	17.061	0.000559696	0.00284301
YOR1	-0.816225	11.6437	9.01455	0.00727189	0.0207463
CAALFM_C304450CA	-0.81578	1.28901	5.41727	0.0324152	0.0694168
CAALFM_C504340WA	-0.815394	4.24929	47.3475	2.52457e-06	5.77495e-05
SEC20	-0.815007	2.79326	27.601	6.26491e-05	0.000534376
CAALFM_C103940WA	0.814918	5.50072	19.173	0.000400849	0.0021761
MUP1	0.814797	8.77497	24.0065	9.71512e-05	0.000741714
CAALFM_C301780CA	-0.814653	1.49632	8.5919	0.00925319	0.0252052
MRV2	-0.81407	7.96795	4.21927	0.055519	0.106845
CAALFM_C201740CA	-0.813932	2.87161	7.36128	0.0146718	0.0366583
CAALFM_C602490CA	-0.813089	3.78244	33.345	2.15873e-05	0.0002532
CAALFM_C201690WA	0.812933	6.66555	52.373	1.31116e-06	3.48814e-05
CAALFM_C502410CA	-0.812676	1.79041	12.1948	0.00275744	0.00987675
CAALFM_C300960WA	-0.812648	3.30307	11.6471	0.0032767	0.0112688
STB5	0.812167	5.63249	50.3934	8.96184e-07	2.66604e-05
CAALFM_C106050CA	0.812164	4.79276	29.5444	2.94396e-05	0.000311566
CAALFM_CR03130WA	-0.811749	3.18079	35.8609	1.40764e-05	0.000195419
CTF18	-0.811639	3.54981	26.3529	8.04718e-05	0.000646598
ACB1	-0.811468	4.16206	2.89886	0.106677	0.1796
JEM1	-0.811358	4.13447	32.5657	1.62735e-05	0.000212398
CAALFM_C401240CA	-0.811285	3.07142	23.9245	0.000133941	0.000944943
CAALFM_C208840WA	-0.811171	3.08948	5.34163	0.0334933	0.0711203
CAALFM_C306810WA	-0.810963	3.51798	14.3989	0.00120907	0.00509599
IPL1	-0.810841	3.50812	9.97188	0.00569179	0.0171008
CAALFM_C403400WA	0.810806	2.8497	23.133	0.000159232	0.00108902
IDH1	-0.810464	8.57676	22.5699	0.000135972	0.000954811
tI(UAU)1	0.810398	1.65205	6.39086	0.0215567	0.0498396
SAP3	-0.809475	2.61015	9.88729	0.00585887	0.0174242
ARO10	-0.809317	9.64156	8.21312	0.00983296	0.0265014
MIH1	-0.808998	7.92065	10.8844	0.00373891	0.0123994
YCG1	-0.808225	4.47809	15.8652	0.000784763	0.00369095
UME6	-0.807007	2.14821	11.6171	0.0033082	0.0113513
TPD3	-0.806163	6.2012	18.5621	0.000372398	0.00205568
ALS4	-0.805913	13.6694	5.51492	0.0297285	0.0648358
CYC1	0.805735	7.55216	22.6255	0.000178242	0.00118547
MET1	0.805497	6.77348	26.6871	7.51997e-05	0.000610391
CAALFM_C206230WA	0.805289	5.84791	35.3564	9.70985e-06	0.00015074
DUN1	-0.804993	3.06727	32.3568	2.56908e-05	0.000287308
GSG1	-0.804981	3.04215	13.6615	0.00176758	0.00691533
CAALFM_C407260WA	0.804668	1.90406	6.51624	0.0204876	0.0478625
CAALFM_C207910CA	-0.804438	0.744817	14.8576	0.00125123	0.00521475
TRY4	0.80413	7.9846	25.8978	8.83307e-05	0.000687408
ERG13	-0.804006	7.39374	23.2525	0.000115725	0.000847108
CAALFM_C306530WA	-0.803701	2.9611	13.963	0.00161794	0.0064536
CAALFM_C205590CA	0.803657	3.09743	18.3346	0.000494156	0.00256816
QCR8	0.803432	5.44352	43.6499	4.23077e-06	8.21539e-05
HIP1	0.803162	7.86345	37.1488	7.06883e-06	0.00012025
CAALFM_C701650WA	-0.802841	4.47997	37.5559	1.06769e-05	0.000159323
LAC1	-0.80274	3.64313	16.033	0.000903243	0.00411985
CAALFM_C105440CA	-0.802611	7.80849	19.0583	0.000412359	0.00222541
SFT1	-0.802145	3.09511	5.88756	0.026539	0.0590744
CAALFM_C205400WA	-0.80197	1.51714	7.97581	0.0116142	0.0302972
VMA10	-0.801509	3.45918	30.0563	3.90811e-05	0.00037242
CAALFM_C207630CA	-0.801026	6.25418	6.97493	0.0160312	0.0394698
CAALFM_C600200CA	0.800786	5.69498	34.367	1.16234e-05	0.000171139
SDS22	-0.800705	5.36058	20.1972	0.000312583	0.00182739
DOG1	-0.79925	3.75365	11.5327	0.00339856	0.0115487
CAALFM_C304740CA	-0.798901	3.27154	15.2939	0.001107	0.00478855
CAALFM_C601940WA	-0.798537	3.61969	9.33019	0.00710794	0.0204307
CAALFM_C111780WA	-0.79836	3.43388	8.72892	0.0088051	0.024159
NUO2	0.798162	6.51874	25.1681	7.46612e-05	0.000608001
CAALFM_C404460CA	0.797722	7.88318	35.8975	8.81256e-06	0.000139683
DPB2	-0.797359	5.78574	18.6871	0.000452248	0.00239518
CAALFM_C604200CA	0.797353	4.77517	19.5497	0.000365495	0.00203431
COX8	0.796798	6.6908	30.3933	2.48287e-05	0.00027974
CAALFM_C304870WA	-0.796679	1.09893	5.54601	0.0306705	0.0663868
CAALFM_C502400WA	-0.796672	4.81066	29.8779	2.75237e-05	0.000300633
ZCF4	-0.796304	3.08799	6.14124	0.0238803	0.0542359
RFA1	-0.796124	5.53934	20.6186	0.000282777	0.00171026
PEX17	-0.796031	2.46407	5.36627	0.0331377	0.0706007
GAL7	-0.794996	7.43354	7.43428	0.0142646	0.0357444
HSK3	-0.794115	3.21088	16.2107	0.000860783	0.00396512
CAALFM_C203800CA	0.793818	5.10933	47.6523	2.42267e-06	5.62712e-05
CAALFM_CR10020CA	-0.79365	3.24847	13.4533	0.00188	0.00725375
CAALFM_C202310WA	0.793482	4.42513	33.0184	2.28564e-05	0.000264425
CAALFM_C402820WA	-0.792767	0.557631	6.98368	0.0170006	0.0413979
CIRT4B	-0.791395	4.72403	13.9857	0.00160726	0.00641947
FGR43	-0.790826	3.44521	16.7052	0.000753905	0.00357365
USO1	-0.790545	6.58153	27.309	4.68156e-05	0.000427069
CAALFM_C400770CA	-0.79052	4.41926	60.3098	5.1108e-07	1.79744e-05
CAALFM_C702920WA	0.789831	6.35086	8.6349	0.00837797	0.0231766
CAALFM_C112140WA	0.788219	4.83102	30.0456	3.91599e-05	0.00037242
CAALFM_CR00130CA	-0.788213	4.85626	31.922	1.84076e-05	0.00023063
CAALFM_C202960CA	-0.787841	4.97841	16.6036	0.000774593	0.0036545
DSL1	-0.787742	2.16189	9.2993	0.00718552	0.0205949
COX5	0.787725	6.91146	28.4128	3.71259e-05	0.000358725
ZCF23	0.787683	5.34992	20.7229	0.000275896	0.00167957
CAC2	-0.787068	3.33074	54.3917	1.02149e-06	2.97107e-05
CAALFM_CR08200CA	0.786784	6.8153	47.2886	2.54479e-06	5.78225e-05
CTN1	0.786134	9.19739	7.25798	0.0152708	0.0378883
CAALFM_C602200CA	-0.786117	1.30294	5.95489	0.0258017	0.0576458
CAALFM_C603180CA	0.785962	8.19532	44.9079	3.53671e-06	7.28948e-05
LHP1	-0.785908	5.49048	21.7628	0.000165139	0.00111552
CAALFM_C107980CA	-0.785053	5.75361	20.1464	0.000316406	0.0018346
FCY2	-0.784609	3.99744	28.6013	3.57043e-05	0.00035003
NIF3	-0.784324	3.47567	25.9425	8.75211e-05	0.000683374
TTR1	0.784187	7.76736	11.0063	0.00358643	0.0120077
SFL2	0.784185	6.21619	5.31116	0.0339392	0.0717774
CAALFM_C405890WA	-0.784162	1.79423	6.01515	0.0251618	0.0567196
CAALFM_C205770WA	-0.783856	6.99163	23.3868	0.000150583	0.00104082
OXR1	-0.783785	5.25877	29.2399	4.55882e-05	0.000419751
CAALFM_C403230CA	-0.783775	7.17512	21.614	0.00022421	0.00142527
CAALFM_C114500CA	0.783618	5.8246	29.3141	4.49497e-05	0.000416337
CAALFM_C407000WA	-0.783393	1.77627	3.72781	0.0701987	0.128425
NUP159	-0.783255	6.02961	15.4185	0.000893264	0.00408669
CAALFM_C402400CA	-0.782711	3.10201	24.8421	0.000110085	0.00081671
HEM13	-0.782226	5.37817	18.8313	0.000346802	0.00195916
CAALFM_C404620CA	0.78193	3.462	10.8189	0.00428458	0.0138367
GDH2	0.781863	12.9757	9.08653	0.00708116	0.0203731
CCT7	-0.781602	5.822	25.9846	8.67682e-05	0.000680511
CAALFM_C403950CA	0.781387	0.828979	4.50551	0.0486212	0.095924
CAALFM_CR04820WA	-0.780582	9.39516	7.96585	0.0108164	0.0286117
ERG9	-0.780562	4.58424	10.4415	0.0043572	0.0140196
DAK2	-0.780284	4.44361	16.0021	0.000910871	0.00414525
CAALFM_C400820WA	0.780155	4.25122	28.6098	5.14426e-05	0.000458203
GIT2	0.779976	6.04736	4.46992	0.0494226	0.0971212
MCI4	0.779497	4.91678	59.3817	5.67645e-07	1.93673e-05
SAP6	-0.779394	2.79108	12.5465	0.00215356	0.0081183
SEC22	-0.77935	2.5969	13.5726	0.00181462	0.00705634
CAALFM_C602880WA	0.779045	1.62446	11.7019	0.00322008	0.011112
CAALFM_C502560CA	-0.778366	4.97856	32.9433	2.31601e-05	0.000266915
CAALFM_CR01560WA	-0.777968	1.41452	8.78179	0.00792915	0.0222303
CAALFM_C209690CA	0.777883	4.71805	45.5257	3.24315e-06	6.89625e-05
CWH8	-0.777738	3.56353	20.1651	0.000314994	0.00183249
CAALFM_C503150WA	-0.777446	8.58908	25.4956	6.94114e-05	0.000574213
CAALFM_C603470WA	0.777168	5.87007	16.4554	0.000805909	0.00377197
STE18	-0.776641	0.855765	7.38095	0.0145608	0.0364111
CHO2	0.776615	6.27573	13.8944	0.00165067	0.00656247
CAALFM_CR02500WA	-0.776608	3.79271	11.5783	0.00334946	0.0114538
CAALFM_C406710WA	0.776165	4.30115	8.98475	0.00803253	0.0224888
CAALFM_C203110WA	-0.776076	6.5675	3.78363	0.0665737	0.12326
MSO1	0.775421	4.85391	13.0385	0.00212873	0.00805981
MEA1	-0.775056	3.69539	12.0542	0.00288133	0.0102055
CAALFM_CR06100CA	-0.774248	3.40281	15.3426	0.0010921	0.00474004
CAALFM_C100190CA	0.773486	4.70903	14.9556	0.0012171	0.00511133
DAL8	0.772897	5.72591	10.5698	0.00465301	0.0147493
CAALFM_C107630WA	0.772887	4.93505	29.3373	3.07036e-05	0.000316568
RRP8	-0.772842	5.46215	20.3101	0.000236769	0.00148788
CAALFM_C102200CA	-0.772307	3.36484	32.3938	2.55226e-05	0.000286488
CAALFM_C302660WA	-0.771913	2.58064	2.91021	0.106044	0.178783
PWP2	-0.771023	6.76701	17.2435	0.000654139	0.00319398
CAALFM_C702090CA	0.770673	3.84893	31.4647	3.01553e-05	0.000313439
CAALFM_C405340WA	-0.770637	3.03229	18.361	0.000392882	0.00214328
CAALFM_C109360CA	0.770403	7.58838	38.9848	8.51487e-06	0.00013749
NPR1	0.770368	7.48586	32.1635	2.65919e-05	0.000294657
CAALFM_C400320CA	0.770334	4.69054	22.056	0.000153809	0.00105792
PFY1	-0.770036	5.4103	15.6411	0.0010055	0.00445832
GYP1	0.769571	5.12264	18.189	0.00051272	0.00264943
PNP1	-0.769315	3.62821	7.5205	0.0138001	0.0347969
TRX2	-0.76776	1.35979	8.42495	0.00983437	0.0265014
CAALFM_C601120CA	-0.766989	1.30407	8.19831	0.0106906	0.0283285
CAALFM_C402520CA	0.766716	7.28816	5.23166	0.0337143	0.0714137
CAALFM_C112540WA	-0.766642	1.83502	5.61786	0.0284147	0.0625807
CAALFM_CR04940WA	0.766173	6.50075	42.3354	2.98252e-06	6.50232e-05
EAP1	0.766092	5.64116	19.7987	0.000344039	0.00194719
CAALFM_C100100CA	0.765357	1.93945	9.04748	0.007855	0.0220634
FAA2	0.764806	6.69416	11.4532	0.00348632	0.0117949
MRP8	-0.764467	2.73179	24.1333	0.000128042	0.000912924
CAALFM_C108080CA	0.764227	5.23467	23.7479	0.000103121	0.000775931
VPS8	-0.764168	5.43314	19.178	0.000316667	0.0018346
CAALFM_C107950CA	-0.763793	3.62819	25.8423	8.93457e-05	0.000691742
IQG1	-0.763186	4.29925	8.86738	0.00837703	0.0231766
CAALFM_C306490WA	0.76199	5.30626	16.8672	0.000590713	0.00295308
CAALFM_C108040WA	-0.76154	4.01226	8.31882	0.0102253	0.0273838
CAALFM_C300830CA	-0.761147	5.41581	22.1496	0.000198403	0.00128973
CAALFM_C107210CA	0.761055	5.06276	29.6222	4.24016e-05	0.000397614
IFI3	-0.761042	3.7779	19.4784	0.000371906	0.00205568
EXO70	-0.761024	5.54449	33.6619	2.04309e-05	0.000246391
MFG1	0.760358	6.02765	31.4815	2.0046e-05	0.000243577
CAALFM_C701360CA	-0.760174	1.122	4.00042	0.0615642	0.116038
STP1	0.759696	6.31455	15.642	0.000837035	0.00388835
CAALFM_CR05370WA	-0.759638	10.7013	12.2256	0.00238924	0.00883024
ERG10	0.759625	6.16176	11.9733	0.00259485	0.00945187
SET6	-0.759405	4.59061	21.93	0.000208562	0.00133847
CAALFM_C208900WA	0.759117	3.8045	25.1675	0.0001028	0.000775039
CAALFM_C503000CA	-0.758819	2.67892	17.2332	0.0006559	0.00319865
CAALFM_C403300CA	-0.758183	2.08981	6.83762	0.018012	0.0432159
PXA2	0.758107	6.15203	20.94	0.000202177	0.00131003
MED1	-0.758052	4.45226	34.281	1.83659e-05	0.000230585
FRS2	-0.757958	7.52306	16.1994	0.000713116	0.00339898
BUB2	0.75769	2.15028	15.7972	0.000963292	0.00432193
CAALFM_C503550WA	0.757547	7.10876	25.9332	6.30221e-05	0.000535068
SOD4	0.757471	4.41944	17.1981	0.000661945	0.00322007
MEF2	0.756985	5.41552	21.5084	0.000229729	0.00145576
STB3	-0.756925	8.15642	9.01424	0.00727273	0.0207463
BMT4	-0.756488	3.3441	12.0629	0.00251966	0.00922756
CAALFM_C100830WA	0.756023	6.053	12.2071	0.00274688	0.00985061
ROA1	-0.755734	10.6815	6.9317	0.0163159	0.0400536
CAALFM_C301910CA	-0.755632	4.69401	9.66699	0.00632054	0.0184931
CAALFM_C303270WA	-0.755263	2.24602	13.6696	0.00176336	0.00690717
CAALFM_C401220CA	-0.755197	3.54432	21.0048	0.00025823	0.00158966
CAALFM_C105330CA	0.754683	5.82528	41.5522	5.75355e-06	0.000101596
CAALFM_C206140CA	-0.753736	0.391878	3.7205	0.0704489	0.128726
CAALFM_C201050WA	0.753257	1.93308	12.1027	0.00283793	0.0100992
SLK19	-0.753092	7.94759	14.8512	0.00105582	0.00463716
CAALFM_C306680CA	-0.753064	3.34917	7.62156	0.0123746	0.0318678
FLO9	0.752854	5.91622	22.814	0.000170897	0.00114545
BAS1	0.752001	5.85527	37.9163	1.00789e-05	0.000154877
CAALFM_C502480WA	0.751494	3.7049	27.3659	6.56375e-05	0.000550535
CAALFM_C500840WA	-0.75133	2.7447	31.9323	2.7716e-05	0.00030158
CST20	0.751302	7.17069	35.6198	1.46518e-05	0.00020169
CAALFM_C505360CA	0.750782	7.69592	35.8724	8.85204e-06	0.000139941
CAALFM_C306270CA	-0.750182	3.35503	17.3857	0.000630314	0.00310478
CAALFM_CR00820CA	-0.749736	2.66922	30.2667	3.75778e-05	0.000362511
CAALFM_C301820WA	-0.749669	3.81052	7.36529	0.0136982	0.0345689
CAALFM_C602810CA	0.749477	5.63946	49.8244	1.81645e-06	4.55167e-05
CAALFM_C114020WA	0.748329	3.18331	8.48285	0.00962826	0.0260343
CAALFM_C400740WA	-0.748142	2.48022	21.7823	0.000215714	0.00137852
ETR1	-0.747839	6.10323	6.67163	0.0192453	0.0455416
MRT4	-0.747574	5.17715	10.8663	0.00421831	0.0136739
MRR2	0.747427	5.27813	15.7601	0.000808907	0.00378095
ASH2	-0.74709	3.3932	22.6363	0.000133841	0.000944943
CAALFM_C703860WA	0.747047	9.08743	17.3865	0.000511576	0.00264731
CAALFM_C405730WA	-0.746943	0.681519	6.04297	0.0248724	0.0561932
CNH1	0.746084	7.52656	32.1219	1.77134e-05	0.000226155
CAALFM_CR02620CA	0.745971	5.44004	20.5387	0.000288173	0.0017299
CAALFM_C406410WA	-0.745542	3.69186	10.4337	0.00486913	0.0151979
SAP4	-0.745121	1.76336	8.65081	0.00905744	0.024739
OPT4	0.744729	3.64957	10.8717	0.00421092	0.0136572
SOD3	0.744466	6.76754	16.1827	0.000867318	0.00399218
CAALFM_C400390WA	-0.744127	2.38981	14.0742	0.00156636	0.00627686
ARE2	-0.743909	6.59279	24.3236	0.000122919	0.000885388
DUR32	0.743881	3.81705	31.6211	1.95099e-05	0.000239472
CAALFM_C502690WA	-0.743837	4.79058	11.3646	0.00358699	0.0120077
RNA1	-0.743812	4.56163	14.6594	0.00132363	0.00546369
CAALFM_C102040CA	-0.743436	7.55006	8.07334	0.010376	0.0276191
CAALFM_C405850CA	-0.743237	6.41854	5.11777	0.0369332	0.0768837
SMC5	-0.74322	4.21851	22.2497	0.000146799	0.00102252
CAALFM_C106650WA	-0.743195	4.82981	31.4939	2.99962e-05	0.000313439
CAALFM_C701150WA	0.74291	5.01774	6.79498	0.0172546	0.0418981
LEU4	0.742256	3.89232	18.8376	0.000435575	0.00231756
CAALFM_C107960WA	-0.741489	3.58606	16.7897	0.000603646	0.0030037
UAP1	-0.741335	5.53489	8.14994	0.0108841	0.0287277
MNN24	0.740919	5.3497	6.32408	0.022152	0.0509158
CAALFM_C206090WA	0.740804	6.23492	43.8168	4.13048e-06	8.09868e-05
CAALFM_C503520WA	0.74063	0.95705	6.4959	0.0206569	0.0481649
AOX1	-0.740358	5.61164	7.03538	0.0166582	0.0407283
CAALFM_C405970WA	0.740206	4.76758	17.3728	0.000632429	0.00311013
CAALFM_C114310WA	-0.73999	3.00397	17.4333	0.000622567	0.00307223
WOR3	-0.739859	1.84267	5.7157	0.0285324	0.0627485
CAALFM_C603820CA	-0.739835	3.78655	12.0356	0.00289817	0.0102531
CAALFM_C302340WA	-0.7395	1.73933	5.97087	0.0256302	0.0573733
CAALFM_C300170CA	-0.739423	4.86171	19.9303	0.00033328	0.00190234
RME1	0.738865	6.7009	19.6533	0.000356387	0.00199835
CBK1	-0.738654	6.10171	35.2136	1.56815e-05	0.000208446
DBF2	-0.737892	4.45339	10.7581	0.00437148	0.0140422
LRG1	0.737603	7.47842	39.1636	5.00839e-06	9.28326e-05
TPO2	0.7374	7.86869	3.7242	0.0685634	0.126198
MAS1	0.73711	6.26611	20.2258	0.000310454	0.0018167
CAALFM_C703730CA	0.736432	5.29645	18.433	0.000385415	0.00210826
CAALFM_CR02970CA	0.735989	6.25498	49.2453	1.95955e-06	4.83008e-05
CAALFM_C404670CA	0.735777	5.08997	26.938	5.0676e-05	0.000453382
PSA2	-0.735667	5.05561	12.6821	0.00237225	0.00879435
CIS2	0.735388	6.03585	23.0699	0.000161465	0.00109807
CAALFM_C502500CA	0.735066	6.46739	32.0234	2.72665e-05	0.000300054
APT1	-0.734666	3.96221	21.4782	0.000231332	0.00145978
CAALFM_CR03120WA	-0.734101	6.95137	16.351	0.00082881	0.00385607
CAALFM_C604320CA	-0.734098	0.706833	6.15943	0.0237017	0.0539113
CAALFM_C202200WA	0.732046	6.36024	20.1853	0.000313473	0.00183082
THI13	-0.731265	2.24864	8.76875	0.00867947	0.0238794
CAALFM_CR05010WA	-0.73111	3.50781	22.504	0.000183164	0.00120756
CAALFM_C502200WA	-0.730867	2.34145	24.525	0.000117746	0.000856707
ZCF14	-0.730845	1.86967	7.52364	0.0128626	0.0329002
CAALFM_C106910CA	0.730829	5.73472	20.0139	0.00025526	0.00157458
CAALFM_CR03340CA	-0.730693	3.21965	32.7508	2.39583e-05	0.000272989
CAALFM_CR10620CA	0.73063	5.67564	42.5044	4.99722e-06	9.28326e-05
CAALFM_C201060CA	0.730425	2.91844	29.2615	4.54011e-05	0.000419751
VPS27	0.729876	6.91511	27.4089	6.5079e-05	0.000547359
CAALFM_CR01080WA	-0.729674	5.81598	14.8026	0.00107119	0.0046707
CAALFM_C300590WA	0.729384	-0.377554	0.449025	0.512871	0.618827
SEC2	-0.72927	7.85863	11.3134	0.00323201	0.0111341
LIP3	-0.729267	-0.524109	2.79777	0.112519	0.187139
CAALFM_C702850WA	-0.729053	5.06864	29.315	4.49418e-05	0.000416337
BIO2	-0.729034	0.76954	7.13099	0.0160454	0.0394859
CAALFM_C205910WA	0.72814	6.34915	45.0431	3.46998e-06	7.25196e-05
CAALFM_C103490WA	0.727868	5.35402	6.37346	0.0217101	0.0501366
CAALFM_C111940CA	-0.72767	2.59461	21.6857	0.000220547	0.00140346
DOA4	0.727393	7.13811	25.8273	6.45063e-05	0.000545316
CAALFM_C307110WA	-0.727071	4.19421	24.1622	0.00012725	0.00090942
CAALFM_C206520CA	-0.726898	3.66965	13.3274	0.00195185	0.00747444
MDH1-3	0.726619	6.25798	18.3991	0.000486177	0.00253762
CAALFM_C501410CA	-0.726417	5.26301	26.4783	7.84464e-05	0.000633339
CAALFM_C600120WA	0.72639	1.98341	13.2401	0.00200351	0.00763356
CAALFM_C108340CA	-0.726238	4.4816	22.0499	0.000202945	0.00131143
CAALFM_C113750CA	0.726088	2.6218	24.3915	8.89586e-05	0.000690516
CAALFM_C601780CA	-0.725372	3.88185	9.17605	0.00750478	0.0212689
CAALFM_CR01070WA	-0.725312	1.55949	6.82559	0.0180983	0.0433446
CAALFM_C402260CA	-0.725267	4.74535	17.5344	0.000491256	0.00255529
CAALFM_C301620WA	-0.725229	2.93031	15.3701	0.00108378	0.00471877
CAALFM_C600810CA	-0.724577	4.53969	5.24347	0.0349542	0.0736013
CAALFM_C201870CA	0.724523	4.4313	13.6074	0.00179606	0.00699318
NAT2	0.723868	5.46886	39.1048	8.35694e-06	0.000136024
CAALFM_CR08550WA	0.72384	6.19542	31.4285	3.03541e-05	0.000314963
CAALFM_CR07190WA	-0.723793	6.47373	25.5759	6.81862e-05	0.000567092
RAD50	-0.723772	5.08241	6.70185	0.0190138	0.0451353
HOF1	-0.72304	2.74429	12.8728	0.00223825	0.0083851
CAALFM_C305060WA	-0.722781	3.81145	15.6122	0.00101352	0.00448401
CAALFM_C102320CA	0.722694	6.51872	31.3534	3.07709e-05	0.000316568
CAALFM_C208380CA	-0.722457	4.0975	27.142	6.86315e-05	0.000569321
CAALFM_C306760WA	-0.721718	4.6528	19.7495	0.000348168	0.00196189
SGA1	-0.721511	5.27658	15.5755	0.000853352	0.00393689
CAALFM_C109060CA	-0.721067	2.0641	5.24795	0.034886	0.0734844
CAALFM_C108970WA	-0.721003	6.22659	8.6575	0.00830709	0.0230545
CAALFM_C503480CA	0.720572	4.19775	15.6529	0.00100223	0.00444708
CAALFM_C205510CA	-0.720173	2.99702	11.5524	0.00337726	0.0115093
CAALFM_C701190WA	-0.719416	2.24557	9.95823	0.00571837	0.0171636
CDC14	-0.71916	3.9115	13.4703	0.00187051	0.00722715
RTT109	-0.718963	1.92986	12.1756	0.00277397	0.00991242
AGE1	-0.718913	5.91516	34.6075	1.73718e-05	0.000222736
CAALFM_C400050WA	-0.718849	4.81116	23.1149	0.000159866	0.00109212
ATO9	-0.718827	0.458642	3.62875	0.073681	0.133513
CAALFM_C113290WA	-0.718641	0.0853919	4.31221	0.053162	0.103097
POL32	-0.718586	4.55476	40.1771	4.23081e-06	8.21539e-05
ACS1	0.717698	11.2871	6.70084	0.0179362	0.0431193
OPT1	0.71749	4.88701	28.8921	4.87217e-05	0.000440052
PEP8	-0.71728	5.63427	20.5191	0.000289518	0.00173109
CAALFM_C201530CA	0.717187	6.88458	22.7086	0.000174963	0.00116752
CAALFM_C201730WA	-0.71658	1.08785	5.16566	0.0361644	0.0755641
ITR1	0.716347	6.86462	9.65584	0.00575497	0.0172221
BCK1	0.716192	6.30569	33.3301	2.16435e-05	0.000253304
DBP5	-0.716061	6.64275	23.1762	0.000157718	0.00108111
ROM2	0.715891	8.05927	25.3756	7.12859e-05	0.000584119
CAALFM_C208650WA	0.715704	4.19412	30.7673	3.42524e-05	0.000339655
CAALFM_C110630CA	-0.715591	3.39743	14.4104	0.00120488	0.00508476
CAALFM_C103330CA	0.715164	5.43801	36.4106	1.28567e-05	0.000183017
CAALFM_C703140WA	-0.714788	2.75914	6.68443	0.0191468	0.0453442
ARG1	-0.714198	9.20689	10.0222	0.00504915	0.0156368
CAALFM_C114430CA	0.712891	3.59579	14.9476	0.00102603	0.00452276
MLH1	-0.712702	3.13498	23.2074	0.00015664	0.00107494
CAALFM_CR09620CA	-0.711933	4.31873	6.56519	0.0200867	0.0470899
CAALFM_C403730CA	-0.710977	3.05679	8.84682	0.0084391	0.0232924
CAALFM_C207980WA	-0.710858	2.25811	10.4334	0.00486967	0.0151979
SMI1	-0.710521	7.89181	17.8419	0.000560222	0.00284301
CAALFM_C306860CA	-0.710305	5.35046	11.2959	0.00366736	0.0122158
KIS2	0.710278	6.1659	23.3086	0.000153191	0.00105487
TUF1	0.709142	8.26206	21.4845	0.000176749	0.00117683
RIM8	0.707877	6.6379	26.9738	7.09824e-05	0.000583214
CAALFM_C101010WA	0.707523	5.62865	25.0098	7.7356e-05	0.00062621
ADR1	0.707428	8.99949	19.1965	0.000315144	0.00183249
GNA1	-0.707414	1.97027	14.9098	0.00123292	0.00516697
CAALFM_C700430WA	0.706427	7.48696	11.8469	0.00270517	0.00976481
IFA4	-0.706178	3.2203	23.4832	0.000147435	0.00102458
AXL1	-0.706022	12.1927	6.50321	0.0194683	0.0459433
CSP37	-0.705727	7.8123	11.4099	0.0035351	0.0119132
GYP2	0.70545	5.9481	36.6733	1.23158e-05	0.000178358
HST2	0.704647	3.81695	38.1122	9.76963e-06	0.000150892
CAALFM_CR10610CA	0.704337	1.95043	17.5774	0.000599733	0.00298827
CAALFM_CR03530WA	0.703977	7.3289	27.9922	5.80077e-05	0.000501875
CAALFM_C108470WA	0.703976	3.1575	19.0329	0.000414967	0.0022335
AFT2	0.703758	6.35603	40.7238	3.86752e-06	7.70824e-05
ISC1	-0.703649	2.47657	9.88449	0.00586449	0.0174242
CAALFM_C112660WA	-0.703537	2.79955	3.84127	0.0664439	0.123084
PRD1	-0.703466	4.98364	22.3019	0.000191686	0.00125552
BUD7	-0.703348	4.91397	17.4507	0.000619757	0.00306278
CAALFM_CR00290WA	0.703246	7.84548	10.5274	0.00422888	0.0137008
PLC2	-0.702539	7.13116	18.8083	0.000348911	0.00196189
CAALFM_C407060WA	0.702292	7.5426	31.7703	2.85353e-05	0.000307175
KTR2	0.702198	3.79263	11.9731	0.002595	0.00945187
CAALFM_C403000CA	0.701923	5.4003	38.2107	9.61808e-06	0.0001497
HGT18	-0.70186	3.55595	11.1599	0.00383255	0.0126449
LIP6	-0.701438	2.46787	23.4665	0.000147974	0.00102596
CAALFM_C603320WA	-0.701419	4.02666	24.5918	0.000116082	0.000847667
CAALFM_C401460CA	-0.700909	3.03664	14.4365	0.00141075	0.00574478
CAALFM_C100370WA	-0.700754	2.68798	9.604	0.00646	0.0188373
CAALFM_CR02700WA	-0.700245	2.25759	6.14641	0.0238294	0.0541406
CAALFM_C302140CA	-0.699119	5.22397	7.41616	0.0143644	0.0359647
ENA21	0.698744	9.50584	11.3736	0.00316718	0.0109671
CAALFM_C113060CA	0.697918	7.22084	23.5643	0.000107605	0.000806091
ALS9	0.697761	7.45339	29.8937	2.74367e-05	0.000300633
CAALFM_C404970CA	0.697164	3.86167	18.0155	0.000535875	0.00274483
CAALFM_C104530CA	0.696982	4.57121	28.8341	4.92677e-05	0.000442749
tP(UGG)1	0.696927	-0.677942	0.992334	0.333006	0.443055
CAALFM_C305550CA	-0.695963	4.39964	11.6115	0.00331418	0.0113589
NAG6	0.695195	6.1397	11.0657	0.00395177	0.0129391
RDN58	0.695123	5.45522	1.18119	0.290592	0.398746
MEC1	-0.694603	6.11564	19.1507	0.00040306	0.00218107
CAALFM_CR00090CA	0.694564	5.15956	14.5158	0.00137904	0.00564611
CAALFM_C603050CA	0.69412	3.86167	17.1964	0.00066225	0.00322007
tS(AGA)3	-0.693873	0.273955	4.42707	0.0504076	0.0986747
CAALFM_CR10830CA	0.693705	4.63836	10.654	0.00452454	0.0144493
CAALFM_CR03110WA	0.693676	4.34052	29.7853	4.11189e-05	0.000387995
CAALFM_C205900WA	-0.693587	0.168625	4.376	0.0499893	0.0979829
CAALFM_CR08830WA	0.693277	6.52345	5.18518	0.0344247	0.0726891
CAALFM_C503440WA	-0.693206	1.8029	3.66669	0.0723238	0.131516
TAF145	0.693066	6.12385	30.5198	2.42124e-05	0.000274332
CAALFM_C200060CA	0.693002	2.03901	7.98727	0.0115645	0.0302067
CAALFM_C200940WA	-0.692973	7.79257	18.259	0.000503692	0.00261098
TES15	-0.692577	6.08412	5.59861	0.0299887	0.0652242
SAP2	0.692525	5.00451	8.99417	0.00800558	0.0224238
RPC19	-0.6925	4.08986	5.70177	0.0287013	0.0630281
END3	-0.692483	4.50134	10.875	0.00420632	0.0136496
MPP10	0.692376	5.29155	22.9848	0.000164539	0.00111396
MRV8	-0.692233	1.29571	5.99813	0.0253407	0.056974
PPS1	-0.691694	3.17375	13.5273	0.00183915	0.00712519
CYT2	0.691346	4.39613	36.3444	1.29972e-05	0.000184249
MVB12	0.690816	4.02509	17.4632	0.000617743	0.00305783
TRK1	0.690768	6.43786	37.0165	1.16473e-05	0.000171139
MLH3	0.690493	5.57819	23.1797	0.000117715	0.000856707
CAALFM_C703240WA	-0.689856	7.32494	9.29208	0.00720381	0.0206277
CAALFM_C207080CA	0.689856	3.63621	17.8453	0.000559734	0.00284301
PMT6	-0.689832	4.95173	28.8892	4.87489e-05	0.000440052
CAALFM_CR01300WA	0.68983	4.08291	14.2534	0.00148709	0.00601509
CAALFM_C101620CA	-0.689314	6.18019	6.37008	0.0217401	0.0501866
CAALFM_CR10760CA	0.689195	3.59861	28.1631	3.91056e-05	0.00037242
SFT2	0.689037	3.97493	19.3208	0.000305107	0.0017941
CAALFM_CR09750CA	0.68882	5.01783	12.2783	0.00268674	0.00971569
CAALFM_C209100CA	-0.688616	4.19833	31.0046	3.27926e-05	0.000329136
PHR3	0.688537	5.604	17.6959	0.000581657	0.00291989
FHL1	0.688406	6.58862	34.381	1.8055e-05	0.000229096
FUM12	-0.687988	8.20519	14.3232	0.00123703	0.00517671
CAALFM_CR06510WA	-0.687247	3.4499	3.72585	0.0702657	0.128508
CAALFM_C110420CA	0.687107	5.54967	39.1079	8.35286e-06	0.000136024
CAALFM_C101510WA	-0.686807	8.34891	11.349	0.0031935	0.0110368
tG(UCC)1	-0.68663	1.1386	8.00189	0.0106665	0.0282769
RNR3	0.685157	6.79754	17.339	0.000518305	0.00267297
CAALFM_C402960WA	0.685009	7.98323	24.2002	9.293e-05	0.000715822
CAALFM_C604650WA	0.684978	4.00569	7.54006	0.0136971	0.0345689
CAALFM_C207110CA	-0.684725	4.31275	33.5886	2.06921e-05	0.000247594
GPX2	-0.684682	5.90519	8.65776	0.00903467	0.024688
WBP1	-0.684273	5.33139	16.0389	0.000901797	0.00411948
UEC1	0.684126	0.539966	7.34653	0.0147557	0.0368221
CSI2	-0.683497	4.29595	7.81665	0.0123303	0.0317673
CAALFM_C208260WA	0.683113	6.79926	14.8333	0.00106147	0.0046501
CAALFM_C113100WA	-0.683106	5.7448	3.22154	0.0903012	0.156434
NCE102	-0.682088	8.74827	7.6627	0.0121758	0.0314094
CAALFM_C209800CA	-0.681937	0.977684	0.843023	0.371253	0.482669
FGR27	0.681469	7.00938	31.1705	2.12992e-05	0.000251223
VPS4	0.681376	5.26248	25.9389	8.7586e-05	0.000683374
SKN7	0.680974	4.67776	26.5115	5.5555e-05	0.00048764
CAALFM_C405790WA	-0.680277	4.38916	18.4947	0.000474602	0.00249012
CDS1	0.679387	7.0753	14.8368	0.00106035	0.0046501
RDI1	-0.67905	5.41193	9.7585	0.00554667	0.0167482
MRR1	0.67884	7.12423	27.187	4.80473e-05	0.000436404
CAALFM_C603240WA	0.67859	6.8453	2.34456	0.142058	0.226655
ARA1	-0.678372	4.55281	13.3031	0.0019661	0.0075195
CAALFM_C703820CA	0.678248	0.903191	4.79278	0.0426753	0.0863082
CAALFM_C405310WA	-0.678188	1.49389	3.45383	0.0803371	0.142861
VPS53	0.677901	4.85528	13.9566	0.00138315	0.00565529
CAALFM_C405810WA	-0.677267	7.1913	23.2533	0.000115702	0.000847108
PEX2	0.676819	4.38403	23.965	0.000132774	0.000938901
CAN1	0.676796	9.20436	9.72457	0.00561456	0.0169193
CAALFM_CR06520CA	-0.676505	2.7925	4.50842	0.0485564	0.0958274
CAALFM_C111140WA	0.676345	5.17876	39.9309	7.35405e-06	0.000123708
CAALFM_C107080WA	0.675994	3.30911	12.6446	0.00239963	0.00886324
BNR1	0.675972	5.76115	12.636	0.00240594	0.00888109
RAD54	-0.675605	3.74444	7.22007	0.0154975	0.0383406
CAALFM_C300950CA	-0.675595	3.45998	18.4875	0.000475463	0.00249246
OPT8	0.6745	7.82598	10.7561	0.00390731	0.012852
ZCF38	0.673978	4.9921	33.5587	2.07998e-05	0.000247752
CAALFM_C107010WA	0.67388	2.37456	23.0208	0.000163231	0.00110634
CAALFM_C111690WA	0.67335	6.50823	36.7144	1.22335e-05	0.000177592
PDR16	-0.673297	8.88907	6.39017	0.0204105	0.0477193
VPS20	0.673274	4.88177	15.816	0.00095833	0.00430927
CAALFM_CR10420WA	0.672826	7.0773	23.2792	0.000115002	0.00084489
CAALFM_C306410CA	-0.672772	3.61494	8.05943	0.0112569	0.0295053
CDC13	-0.671881	3.98951	22.2481	0.000194029	0.00126675
FRP5	-0.671101	1.85599	5.35479	0.0333028	0.0708719
CAALFM_C501440CA	-0.670698	5.31452	16.3218	0.000688726	0.00332737
CAALFM_C112700WA	-0.670442	3.40999	15.4437	0.00106185	0.0046501
CAALFM_C504310WA	-0.67038	3.98755	15.4146	0.00107046	0.0046707
RAD3	0.670298	4.55267	9.32013	0.0071331	0.0204738
COF1	-0.66999	4.99684	21.6977	0.000219937	0.00140105
CAALFM_C106800WA	-0.669674	4.55114	6.65702	0.0193584	0.0457197
CAALFM_C505200CA	-0.66964	4.32911	12.0803	0.00285783	0.010158
IPK2	-0.66948	4.60568	16.7221	0.000615178	0.00304763
ZCF30	0.66944	6.47913	18.5628	0.000372333	0.00205568
CAALFM_C202490CA	0.669055	7.26488	31.558	2.965e-05	0.000311945
PEX7	0.668896	4.41138	13.0221	0.00213929	0.00808963
SEO1	-0.668301	3.44404	5.87849	0.0266402	0.059256
MLT1	-0.668138	8.79584	8.32101	0.00943558	0.0256151
SER2	-0.667933	3.48875	15.9008	0.000936363	0.00423121
USO6	-0.667165	5.56253	12.7943	0.00198915	0.00759167
CAALFM_C601460CA	-0.667095	4.71027	14.2426	0.00149173	0.00602984
BLM3	0.66651	8.73982	14.4534	0.0014039	0.0057246
CAALFM_C206440CA	-0.666426	6.24399	9.98696	0.00566256	0.0170215
CAALFM_C503880CA	-0.666399	1.84971	7.51095	0.0138507	0.0349099
PST1	-0.666178	4.16653	7.71888	0.0127949	0.032777
CAALFM_C112060CA	0.665653	3.90178	8.9804	0.0073644	0.0209583
DAL81	0.665547	5.55159	19.0142	0.000416894	0.00223467
SMD2	-0.665104	2.47698	17.4325	0.000622688	0.00307223
CAALFM_C106400CA	0.665085	5.62062	37.712	1.04131e-05	0.000157211
CAALFM_CR01410CA	-0.664761	4.85182	13.358	0.00166471	0.00660902
XKS1	-0.664016	5.09864	25.9574	8.72532e-05	0.000682541
CAALFM_CR10280WA	-0.663827	3.51261	17.7181	0.000578333	0.00291289
CAALFM_C305790CA	-0.663354	2.75772	4.80317	0.0424765	0.0859925
CAALFM_C407200CA	-0.663346	4.39024	17.8643	0.000557005	0.00283861
CAALFM_CR03480WA	-0.663221	5.42408	3.10409	0.0940376	0.161946
CAALFM_C103750WA	-0.663189	3.60504	14.7358	0.00109275	0.00474004
CAALFM_C111890WA	0.662425	4.85953	11.636	0.00328832	0.0113006
TAZ1	0.662036	4.85746	16.1301	0.000879762	0.00404015
CDL1	0.662005	5.28989	41.8909	5.47077e-06	9.80356e-05
CAALFM_C302850CA	-0.661787	4.65417	5.61947	0.0297231	0.0648358
CAALFM_C104930CA	-0.661356	1.97128	7.00934	0.0168297	0.041081
CAALFM_C203420CA	0.66002	5.79274	32.3866	1.68385e-05	0.000218314
CTA8	-0.659416	7.62835	14.2495	0.00126499	0.00525398
CAALFM_C304730CA	-0.65931	2.13232	4.60221	0.046519	0.0923498
GVP36	-0.659048	5.05356	18.3651	0.00049036	0.00255283
GRE3	-0.658941	4.81003	15.9608	0.000921184	0.00418903
PAM17	-0.658773	4.9986	19.2731	0.000391095	0.00213546
CAALFM_C210470CA	0.658766	4.88131	20.4638	0.000227761	0.00144632
VID27	0.658197	5.58751	8.15144	0.010878	0.0287254
TOP2	-0.658163	5.55887	21.8708	0.000160862	0.00109644
CYK3	-0.658148	2.7734	20.1698	0.00031464	0.00183249
CAALFM_C502450WA	-0.658013	4.1646	16.3424	0.000830737	0.00386207
CAALFM_C407080CA	-0.657265	3.355	20.7749	0.000272541	0.00166418
CAALFM_C208020CA	0.657158	5.29484	34.3414	1.81774e-05	0.000229652
ADE1	-0.657073	5.29994	16.9295	0.000580533	0.0029191
ZCF22	0.656799	3.36551	6.57219	0.0200301	0.0469937
CAALFM_C206740WA	0.65606	4.61417	17.7863	0.000568275	0.00287421
CAALFM_C107940WA	-0.655932	2.78454	7.49979	0.0139101	0.0350158
CAALFM_C303110WA	0.655929	6.31502	13.4943	0.00185724	0.00718507
MBP1	0.655638	5.97819	19.1218	0.000405945	0.00219472
CAALFM_C114460WA	0.655605	5.80829	17.0854	0.00068181	0.00330719
HAL9	0.655099	7.69779	9.46293	0.00617046	0.0181507
CAALFM_CR00500CA	-0.655057	3.26633	8.27064	0.00961884	0.0260343
CAALFM_CR04390CA	0.65489	4.96241	25.9675	6.25495e-05	0.00053428
BUL1	-0.65477	6.2199	5.01086	0.038718	0.0799293
CAALFM_C406180CA	-0.654328	7.31665	10.5929	0.00413394	0.0134436
CCT8	0.654285	6.31082	14.7017	0.00110396	0.0047825
CAALFM_C600340CA	0.653906	5.64976	42.8057	4.78157e-06	8.9956e-05
CAALFM_C209760WA	-0.653797	2.71121	22.5059	0.000183083	0.00120756
MRS4	-0.65378	5.94819	13.0625	0.00211339	0.00801682
CAALFM_CR01170WA	0.653437	8.00413	19.603	0.000283616	0.00171276
CAALFM_C202520WA	0.65319	4.89566	27.144	4.84907e-05	0.000439033
CAALFM_C307470WA	-0.653059	1.83297	11.8185	0.00310322	0.0108138
RCN1	-0.652202	1.17621	7.30707	0.0149827	0.0373117
CAALFM_C102270CA	0.652005	5.03521	22.2512	0.000193894	0.00126675
CAALFM_C101250WA	-0.651873	5.80841	25.694	9.21235e-05	0.000710516
CAALFM_C210740CA	0.651836	7.54696	24.9025	0.00010869	0.000809345
CAALFM_C200740CA	-0.651817	7.07113	18.9166	0.000339109	0.00192514
GPI1	-0.651509	3.176	7.48303	0.0139998	0.0352124
CAALFM_C307580WA	-0.651174	3.3125	11.679	0.00324361	0.0111613
AKL1	0.650526	6.75549	25.2054	0.000101985	0.000770824
CHT2	-0.650176	3.38764	17.0045	0.000696473	0.00334873
CAALFM_C206280CA	-0.650053	0.516287	3.25762	0.0886616	0.154213
CAALFM_C111100WA	0.649327	3.46036	15.7247	0.000982632	0.00438914
CAALFM_C106530CA	0.6489	7.17376	30.2039	3.80194e-05	0.000366187
BIO32	-0.648445	3.84905	3.26721	0.0882317	0.153554
CAALFM_CR04610CA	-0.64839	2.75337	4.67836	0.044937	0.0897402
CAALFM_C401930CA	0.648155	4.4657	21.4986	0.000230245	0.001456
TOM22	-0.647879	4.38812	6.24678	0.0216806	0.0500877
CAALFM_C306600CA	-0.647712	3.62308	11.4159	0.00352825	0.0118968
CAALFM_C111150WA	0.647557	4.60459	12.4108	0.00257867	0.00940931
RHD3	-0.647537	5.70603	1.64956	0.21608	0.3155
MEP1	0.646061	6.86285	4.94235	0.0384241	0.0795213
MNS1	-0.645849	4.72367	14.5755	0.00135568	0.00556556
CAALFM_C209620WA	0.645606	4.7893	19.4006	0.000379053	0.00208669
CAALFM_C109040CA	-0.645106	4.81104	7.76345	0.0117038	0.0304915
CHL4	-0.644969	1.34587	9.23151	0.00735917	0.0209533
CAALFM_C600920WA	-0.644935	7.61673	8.15625	0.01005	0.0270463
CAALFM_C109310CA	0.644629	5.36815	12.5319	0.00248411	0.00913614
CAALFM_C110330CA	-0.644237	4.24007	14.9786	0.00120923	0.00509599
CAALFM_C704160WA	0.643914	2.93723	8.25628	0.0104639	0.0278008
IST1	-0.643442	2.51261	9.39192	0.00695569	0.0200407
CAALFM_C406360CA	-0.643423	0.394314	5.21786	0.0353474	0.0741449
RMT2	-0.643227	5.10868	15.765	0.000971836	0.00435703
CAALFM_CR05960WA	-0.642844	0.237902	3.74174	0.0697244	0.127828
MCA1	-0.642525	7.36163	8.41744	0.00986146	0.0265626
CAALFM_C401230CA	-0.642459	4.31466	12.1965	0.00275594	0.00987675
CAALFM_CR09840CA	-0.642265	1.17681	5.31381	0.0324992	0.0695473
CAALFM_C600210WA	0.642249	3.93419	24.345	0.000122357	0.000882811
CAALFM_CR09190CA	0.641728	4.20829	24.682	0.000113879	0.00084073
CAALFM_C107150WA	-0.641403	1.81048	9.22634	0.00737262	0.0209719
FLO8	0.641178	8.24316	20.2593	0.000239832	0.00149623
CAALFM_C700590WA	0.639997	3.46837	8.14311	0.0109117	0.028788
MNT1	-0.639869	9.04431	8.61677	0.00843532	0.0232924
CAALFM_C101840CA	0.63978	5.81069	26.271	8.18273e-05	0.000655378
CAN2	0.639373	9.38593	11.4244	0.00311354	0.010831
SAC6	-0.639342	8.98696	9.81451	0.00543657	0.0165648
CAALFM_C202820CA	0.639244	5.42912	35.36	1.53012e-05	0.000204462
CAALFM_C207610CA	0.638911	5.82917	20.2884	0.000238072	0.00149141
CAALFM_C502040WA	0.638451	5.50058	31.9458	2.76488e-05	0.000301392
HOS3	-0.638323	6.70249	6.55701	0.020153	0.047227
CAALFM_C113010WA	0.637814	6.71312	24.5801	8.52263e-05	0.000673667
CBR1	-0.63764	5.33132	16.2166	0.000709631	0.0033904
CAALFM_C303000WA	0.637478	1.79258	7.60543	0.0133592	0.0339403
CAALFM_C502780WA	-0.637459	2.22302	15.8993	0.000936765	0.00423121
CAALFM_C204780WA	0.637176	4.32865	10.9768	0.00362269	0.0120937
tG(UCC)2	-0.636988	0.993165	3.27183	0.0861929	0.150657
RDN18	-0.636974	17.9342	0.893833	0.356207	0.467638
THR1	-0.636382	3.90297	23.8884	0.000134991	0.000950128
CAALFM_C107610CA	-0.636365	0.618048	3.91756	0.0640508	0.119753
CAALFM_C111370CA	0.636214	5.06787	54.9711	9.52115e-07	2.80479e-05
FRP6	-0.635861	8.00226	4.48497	0.0474847	0.0940197
CAALFM_C703620CA	0.635563	4.13007	28.0999	5.67983e-05	0.000493879
CAALFM_C603530CA	0.635489	3.23035	6.35552	0.0218695	0.0504469
CAALFM_C501960CA	0.635366	6.66092	20.6652	0.000216526	0.00138224
CAALFM_C200700WA	0.634451	7.82753	26.2396	5.8936e-05	0.000507001
CAALFM_C400330CA	0.634372	5.57293	24.9276	0.000108116	0.000807059
CAALFM_C106700WA	-0.634289	3.7429	25.3798	9.83363e-05	0.000748869
CAALFM_C502310CA	0.633771	3.21254	21.7985	0.000214919	0.00137489
YHM2	0.633661	6.08153	11.3797	0.0035696	0.0119702
CAALFM_C700190WA	-0.633498	3.75464	10.7147	0.00443457	0.0142222
CAALFM_C104790WA	0.633427	1.33295	6.30593	0.0223171	0.0511666
CAALFM_C101590CA	0.633426	8.20036	26.8407	5.17456e-05	0.000460223
ZCF3	0.633036	6.685	14.6168	0.00133982	0.0055192
CAALFM_C112650CA	-0.632474	3.38457	3.82338	0.06702	0.123848
ALD5	0.632218	11.6788	3.87102	0.0637681	0.119372
CAALFM_C112990WA	-0.632112	1.7853	6.66727	0.0192789	0.0456034
CAALFM_C200650WA	0.631886	6.28217	20.3357	0.000302412	0.001786
CAALFM_C301900CA	0.631865	5.2098	14.1833	0.00151757	0.00610565
CAALFM_C210820CA	0.631814	6.65332	21.5364	0.000228251	0.00144791
OPT7	-0.631728	3.06114	8.98264	0.0073583	0.0209533
CAALFM_C208990CA	0.631471	5.77987	30.597	3.53452e-05	0.00034756
GRE2	0.631425	5.7738	7.42581	0.0143112	0.0358462
GIR2	-0.63134	4.60686	8.62193	0.00841894	0.023258
CAALFM_CR08720WA	0.631299	4.70795	15.9284	0.000929339	0.00421659
CAALFM_C306610WA	-0.63127	4.95801	11.3051	0.003241	0.0111587
HAP31	0.631037	3.58103	20.6854	0.000278347	0.00168938
TCO89	0.630981	6.10779	23.8652	0.000135673	0.000953815
CAALFM_CR08610WA	0.630624	3.83871	11.7662	0.00315511	0.0109315
CAALFM_C209250WA	-0.629688	3.41906	22.5366	0.000181828	0.00120392
CAT8	0.629605	5.21413	32.0289	2.72398e-05	0.000300054
CAALFM_C305540CA	-0.62902	2.15666	7.75812	0.0126061	0.0323813
CAALFM_C106920CA	0.628097	3.10806	20.1583	0.00031551	0.00183249
CAALFM_C603260WA	0.627168	5.25555	6.47924	0.0207967	0.0484482
CAALFM_CR03910CA	0.626308	5.07241	30.0983	3.87756e-05	0.000371649
CAALFM_C401600CA	-0.626174	2.02549	5.13417	0.0366677	0.0764101
CAALFM_C505340WA	0.625517	6.14126	29.9329	3.99947e-05	0.000378954
NOP15	-0.624934	5.38506	11.6733	0.00286531	0.0101786
URA3	-0.624904	2.64334	18.003	0.00053759	0.00275128
CAALFM_CR01770CA	0.624658	5.24925	19.4545	0.000294708	0.00175344
CAALFM_C502520WA	-0.623833	1.22596	5.61533	0.0297757	0.0648938
CAALFM_CR02390WA	0.623578	6.23724	13.3682	0.00192824	0.00740752
FET34	-0.623486	7.62788	5.98993	0.0254273	0.0570839
MAE1	0.623345	5.31722	9.75899	0.00554568	0.0167482
CAALFM_C106630WA	-0.623155	3.15815	8.62325	0.00914842	0.0249424
CAALFM_C201920CA	0.62284	5.5033	6.71253	0.0189327	0.044996
CAALFM_C210060CA	-0.622652	1.66072	4.69835	0.0445321	0.0890789
SEC8	-0.622649	5.51897	12.5022	0.00250693	0.00919767
ENT3	0.622398	6.93451	33.0467	2.27431e-05	0.000264127
ECM7	0.622289	5.07725	26.1995	5.94542e-05	0.000510006
FLC1	-0.622117	9.57694	7.66565	0.0121616	0.0313864
CRK1	0.621625	5.27375	42.1964	5.22895e-06	9.51133e-05
CAALFM_C406150CA	0.621393	0.384261	2.66474	0.120799	0.19829
CAALFM_C203500WA	0.62116	7.97681	26.3407	5.76538e-05	0.000500246
CAALFM_C503510CA	0.621155	6.1647	16.0065	0.000909782	0.00414342
BBC1	0.62081	6.49593	15.2338	0.000942922	0.00424948
CAALFM_C307030CA	0.620753	4.84082	15.0902	0.00117187	0.00496627
MYO1	-0.620645	5.63812	11.9424	0.00298431	0.0104902
COX17	-0.620464	3.06657	2.53746	0.129417	0.210376
LSC2	-0.620021	7.11989	9.02788	0.00723614	0.0207006
CAALFM_C307370WA	0.619808	6.11971	13.4212	0.0016322	0.0065019
MTS1	-0.619805	6.78152	14.2771	0.00147694	0.00597806
UBR1	0.619801	8.85848	26.319	5.79261e-05	0.000501875
ERV46	-0.619757	4.75299	24.3147	0.000123154	0.000885388
CAALFM_CR00460CA	-0.61975	4.79399	15.0832	0.00117417	0.00497253
CAALFM_C106480CA	-0.619649	4.76525	4.50003	0.0487437	0.0961342
CAALFM_CR00350WA	-0.619369	6.7012	12.0881	0.00249896	0.00917398
TIM21	0.619208	2.60078	9.93761	0.00575881	0.0172251
CAALFM_C304790WA	0.618744	5.23177	10.7325	0.00393931	0.012915
CAALFM_C113130CA	0.618395	6.0905	3.43938	0.0791096	0.141344
CAALFM_C304360WA	-0.618312	4.31482	10.3133	0.00506994	0.0156851
CAALFM_C204730WA	-0.618112	3.90714	6.09287	0.023144	0.0528219
RPM2	-0.617623	8.84321	7.74888	0.0117708	0.0306527
CAALFM_C107260CA	-0.617596	4.04905	15.1072	0.00116631	0.00495661
CAALFM_C307280CA	-0.617551	6.674	11.2122	0.00376806	0.0124892
RLI1	0.617514	8.01915	16.3014	0.000692727	0.00333337
CAALFM_C404020CA	0.617117	0.724211	3.08101	0.0970376	0.166338
GTR1	-0.616773	2.57561	6.0575	0.0247228	0.055918
CAALFM_CR10460WA	-0.616062	3.5817	5.35133	0.0333529	0.0708719
DAP2	0.615875	6.56466	19.4503	0.000295029	0.00175362
CAALFM_C109130WA	-0.615798	8.54816	5.88591	0.0252911	0.0568838
SEF2	-0.615167	5.70924	10.9181	0.00414718	0.0134794
CAALFM_C106640CA	-0.614615	3.20842	11.8309	0.00309107	0.0107777
HAP41	0.61428	9.85612	7.06084	0.0154817	0.0383172
CAALFM_C404330CA	-0.614048	5.43733	5.39128	0.0327811	0.0699899
CAALFM_C600900CA	0.613932	3.70591	15.7618	0.000972673	0.00435754
CAALFM_C404110WA	-0.613929	0.322424	2.40454	0.139221	0.223013
CAALFM_C203900CA	0.613869	5.42856	27.3925	4.59918e-05	0.000422746
GAP2	0.613307	9.94961	4.01817	0.0593461	0.112737
APL5	-0.612941	4.98791	9.84842	0.0053711	0.0163984
CAALFM_CR02930WA	-0.612845	6.66909	16.4924	0.000656255	0.00319865
CAALFM_C204480WA	-0.612659	4.53159	10.836	0.00426054	0.0137705
SFI1	0.612419	6.09816	34.7883	1.68472e-05	0.000218314
CAALFM_C604470CA	0.611996	6.58743	18.3074	0.000398555	0.00216835
CAALFM_CR02800CA	-0.611993	4.2705	8.32607	0.010198	0.0273351
CAALFM_C701940CA	-0.611778	8.10568	14.3211	0.00123782	0.00517671
CAALFM_C210150WA	-0.611163	1.26135	4.28429	0.0538576	0.104246
CAALFM_CR02910WA	0.610747	5.77095	18.9214	0.000426591	0.00227779
CAALFM_C204700CA	-0.610634	3.52421	8.35654	0.0100844	0.0271026
HAC1	-0.61059	8.27167	10.1328	0.00485548	0.0151693
DBP2	0.61051	7.65082	14.6667	0.00111556	0.00480863
CAALFM_C504870WA	0.610271	4.93114	20.1256	0.000317987	0.0018382
CAALFM_C400800WA	-0.610246	2.58052	10.5065	0.00475213	0.0149568
FRE9	-0.61007	8.09579	4.6328	0.0443129	0.0887287
CAALFM_C111510CA	0.609607	5.67096	7.90596	0.0119225	0.0309145
CAALFM_C206780CA	0.608708	5.05323	15.7081	0.000987131	0.00440272
CAALFM_C109930WA	-0.608236	1.32165	5.63206	0.0295642	0.0645707
HRT2	-0.607922	3.28381	21.0833	0.000253539	0.00156716
IFH1	0.607407	8.34685	20.3339	0.000302547	0.001786
CAALFM_C206450CA	-0.607118	4.51075	2.79982	0.112396	0.186987
CAALFM_C306950WA	-0.607063	6.54383	5.5346	0.029472	0.0644394
CAALFM_C502210WA	0.607007	5.08887	15.8569	0.000947682	0.00426775
CAALFM_C306260CA	-0.606968	5.13221	8.28202	0.0103649	0.0276108
CAALFM_C207290WA	-0.606853	7.02624	31.2266	2.1067e-05	0.000249984
CTA1	0.606642	3.765	14.2228	0.00150029	0.00605633
ERG251	-0.606576	7.36244	4.23814	0.0550309	0.106118
CAALFM_C602090CA	0.606311	6.36511	17.2752	0.000527495	0.0027088
CAALFM_C101540WA	-0.606233	6.13261	16.4249	0.000668886	0.00324711
VMA22	-0.60608	0.306208	5.69037	0.0387403	0.0799293
CAALFM_C301510WA	0.606047	5.1039	10.6279	0.00456399	0.014536
CAALFM_CR03240CA	-0.605875	4.3519	2.32393	0.145607	0.231461
CAALFM_C403530WA	0.605584	4.66852	5.28716	0.0342951	0.0724408
MPH1	-0.605229	4.28798	16.5664	0.000642707	0.00315041
SPS20	0.60514	5.47964	6.46989	0.0208756	0.0485437
PEX22	0.605109	5.18112	4.79625	0.0426088	0.0862026
CAALFM_C102160WA	-0.604841	2.96844	9.63743	0.00638556	0.0186706
CAALFM_C114560CA	0.604633	4.98688	14.5989	0.00134665	0.00553601
STE23	0.604555	6.65657	14.9727	0.00121126	0.00509741
PGA4	0.604537	7.12706	10.8065	0.00430224	0.0138863
CDC42	0.604523	5.37602	28.1105	5.66806e-05	0.000493879
PTC5	0.604422	7.92474	18.4392	0.000384772	0.00210665
CAALFM_C305280CA	-0.604381	6.13574	11.3461	0.00360845	0.0120528
FCY21	0.604347	6.99473	19.3803	0.000380936	0.00209324
PHB1	0.604341	3.63511	4.07486	0.0594261	0.112818
TEF4	0.604182	1.48108	3.52672	0.0774813	0.139135
CAALFM_C603780CA	0.603951	5.48812	10.8113	0.00383388	0.0126449
CAALFM_C700870WA	0.603911	3.93796	6.79826	0.0182961	0.0437237
RIM21	0.603837	5.19424	36.5546	1.2557e-05	0.000180122
CAALFM_C403190WA	-0.603835	5.77371	11.3893	0.00355861	0.0119524
CAALFM_C400940WA	-0.603789	1.49036	8.46067	0.00970663	0.0262157
XYL2	-0.603767	7.70971	3.00266	0.0991873	0.169398
TUP1	0.603557	7.60776	12.894	0.00192702	0.00740752
ERV1	0.603411	3.71638	14.8472	0.00125491	0.00522648
SEC21	-0.603335	6.57946	14.5031	0.00117169	0.00496627
CAALFM_C200880WA	0.603235	3.56353	15.0717	0.00117798	0.00498518
GLN4	0.602964	7.11631	23.5557	0.000107821	0.000806091
CAALFM_C307450CA	-0.602514	2.74635	7.93637	0.0117871	0.030676
HSL1	-0.60222	5.3509	14.618	0.00113193	0.00486876
CAALFM_C209780CA	-0.602178	4.14347	8.18843	0.0107298	0.0284199
RAD53	-0.602139	4.35034	11.8735	0.00304984	0.0106709
CAALFM_C206800CA	0.601936	4.04321	11.4567	0.00308009	0.0107456
CAALFM_C200090WA	-0.601607	3.00725	11.3033	0.00365858	0.0121933
FRP3	0.601316	9.41279	9.39747	0.00631898	0.0184931
CAALFM_C112870CA	0.601241	3.39575	22.6846	0.000175905	0.0011725
CAALFM_C503730WA	-0.600602	3.21467	3.96405	0.0626416	0.117555
CAALFM_C702670WA	-0.600577	3.4261	8.90392	0.00826803	0.0229883
CAALFM_C201320WA	-0.600418	3.65448	1.69533	0.210099	0.308858
CAALFM_C301220WA	-0.600393	3.2704	4.46286	0.0495832	0.0973133
CAALFM_C603310WA	-0.600284	4.74786	19.6027	0.000360804	0.00201563
VID21	0.600006	5.56932	24.4508	0.000119622	0.000866187
PLB2	0.599846	2.14684	10.461	0.00482486	0.0151049
CAALFM_CR03780CA	0.599704	3.00771	8.75465	0.00872369	0.0239574
CAALFM_CR09700WA	-0.599692	3.62087	9.89458	0.00584424	0.0174031
HGT1	-0.599598	10.2445	8.973	0.00738463	0.0209961
FGR17	-0.599551	3.63225	16.9915	0.000698861	0.00335753
CAALFM_C102490CA	0.599394	4.79962	11.8102	0.00311142	0.0108299
PRP22	0.599341	5.35126	16.9949	0.000570071	0.00287847
ZCF25	0.598858	4.66831	11.9727	0.00295595	0.0104088
THG1	-0.598826	2.05311	9.12273	0.00764784	0.0215718
EST3	-0.597916	0.749271	4.85769	0.0414508	0.084397
CAALFM_C503460CA	0.597495	3.4994	17.381	0.000631086	0.00310605
CAALFM_C301260CA	0.597452	4.19235	10.6029	0.00460208	0.014612
CAALFM_C207180WA	0.597326	-0.136115	1.89587	0.186232	0.281657
CAALFM_C700410CA	-0.597065	3.97748	16.2697	0.000847162	0.00392031
PUT1	0.596565	8.88483	1.93643	0.179997	0.274564
NDT80	0.596528	8.04451	9.79839	0.005468	0.0166103
CAALFM_C207390CA	-0.596111	5.07082	15.9896	0.000757205	0.00358367
CAALFM_C107830CA	-0.595973	1.60897	5.86328	0.0268108	0.0595916
LSC1	-0.595638	6.03562	8.01245	0.0114561	0.0299754
CAALFM_C404720WA	-0.595537	4.61278	11.2927	0.00367118	0.0122217
CAALFM_C702340CA	-0.595206	4.3198	7.8413	0.0122162	0.0315003
EMC9	0.595156	7.13994	33.8375	1.98199e-05	0.000241803
CAALFM_C112480WA	-0.595002	0.368389	2.3584	0.142834	0.227819
HPC2	0.594954	4.68083	22.043	0.000203262	0.00131143
YMX6	-0.594845	6.59963	2.46154	0.133025	0.214854
CAALFM_C604410CA	0.594815	5.37793	19.3469	0.000384069	0.00210471
HLJ1	0.593973	5.16881	29.1631	4.62602e-05	0.000424567
CAALFM_C100580WA	0.593963	4.46233	19.0461	0.000413606	0.00223015
JEN2	-0.593909	4.46774	1.10889	0.30692	0.415301
RPN2	0.593361	7.95153	12.9342	0.00190255	0.00732283
CAALFM_C200750WA	-0.592982	5.09385	3.32211	0.0858181	0.150263
LEU3	0.592892	7.21893	16.6028	0.000636142	0.00312088
SWD1	-0.592675	4.46368	17.6485	0.000588812	0.00294601
CAALFM_CR01720WA	0.592455	5.91322	22.7565	0.000173103	0.00115766
CWH43	-0.592347	5.56038	21.29	0.000241629	0.00150278
PRN1	-0.592298	6.71468	7.12008	0.0151151	0.0375793
MAF1	-0.592141	5.94935	17.5986	0.000596453	0.00297684
CAALFM_C200290WA	0.591946	3.6179	14.4888	0.00138975	0.00567456
CAALFM_C101400CA	0.591501	5.66763	27.9242	5.87864e-05	0.000506435
LIP9	-0.590664	0.53675	4.66391	0.0452325	0.0902706
AVT7	0.590399	5.19963	24.1716	0.000126992	0.000908658
CAALFM_C304630WA	0.590091	5.14325	11.8843	0.00267199	0.00967393
PEX11	0.589908	4.80095	6.02827	0.0250248	0.0564953
CAALFM_C400260WA	0.589748	7.13463	23.2532	0.000115706	0.000847108
CHK1	0.589694	10.0208	10.1716	0.00478948	0.0150175
CAALFM_CR04760CA	0.589609	4.26414	19.6412	0.000357444	0.00200242
MDR1	0.589437	7.63702	2.89777	0.104865	0.17729
URA5	-0.58934	4.48367	20.9096	0.00026405	0.00162052
CAALFM_C208750WA	-0.588497	-0.244483	2.67734	0.119985	0.197166
CAALFM_C306970WA	-0.588249	4.41156	4.89792	0.040712	0.0831731
CAALFM_C303920WA	0.588012	2.54231	6.86427	0.0167715	0.0409647
CAALFM_C301150CA	-0.587994	6.1861	4.0093	0.0613046	0.115693
PKH3	0.587982	5.67917	18.6635	0.000454925	0.00240358
PGA58	0.587908	-0.47325	2.22926	0.153568	0.241888
CAALFM_CR01380WA	-0.587879	5.14352	28.6612	5.0935e-05	0.000454808
BMT7	-0.587568	4.87693	4.71175	0.044263	0.0886876
CAALFM_C600080CA	0.58738	4.81654	2.47424	0.133972	0.215979
CAALFM_CR10820WA	0.586813	1.05924	3.88681	0.065003	0.121084
FET33	0.586676	5.92301	27.0209	7.03148e-05	0.00057919
CAALFM_C105320CA	-0.58653	3.77866	19.0353	0.00041472	0.0022335
MKK2	0.586316	5.59508	20.4711	0.000292828	0.0017457
FGR6-1	-0.586264	2.96559	16.68	0.000758978	0.00358925
RPL3	0.585974	9.5624	10.343	0.00450967	0.0144095
CST5	0.585819	3.53296	13.8503	0.00167215	0.00661736
RTS1	0.5857	6.25483	22.9303	0.000124832	0.000894257
CAALFM_C210730WA	0.585671	4.44552	25.9895	8.66804e-05	0.000680511
CAALFM_CR04870CA	0.585614	4.17291	3.587	0.0752089	0.135803
CAALFM_C601980CA	0.585543	4.07486	19.9507	0.000331645	0.0018948
CAALFM_C402190CA	0.58543	3.1068	1.01986	0.326575	0.436711
SSY5	0.585119	6.60363	34.3243	1.82305e-05	0.000229842
HHF22	-0.584989	2.8019	3.69813	0.0712214	0.129902
CAALFM_C200640WA	0.584936	4.35854	15.2598	0.00111759	0.00481393
FMO2	0.584425	3.78559	5.76058	0.0279958	0.0618385
UGA4	0.583973	1.82414	11.2078	0.00377336	0.0124999
CAALFM_C201720CA	-0.583946	4.01304	7.97305	0.0116262	0.0303154
CAALFM_C401990WA	0.583815	2.22722	7.21764	0.0155121	0.0383454
CAALFM_C405740CA	0.583746	7.02161	42.0127	5.37287e-06	9.71459e-05
YML6	0.583643	4.60171	22.5784	0.000180132	0.00119672
CAALFM_C704090CA	-0.583547	9.01561	4.54441	0.0461791	0.0918563
CAALFM_C210870WA	0.583426	0.848603	3.4675	0.0797923	0.142144
CAALFM_C101040WA	0.583051	4.90539	16.9194	0.000712288	0.00339771
CAALFM_CR04490CA	0.582994	3.48736	10.4902	0.00477805	0.0149972
CAALFM_C112860CA	0.582918	2.95072	20.0094	0.000326986	0.00187299
SPO11	-0.582587	4.21234	9.31611	0.00714318	0.020493
CAALFM_CR09990WA	0.582327	7.34432	13.1439	0.00178048	0.00695043
HGT20	-0.582168	2.92978	9.14467	0.00758861	0.0214549
CAALFM_C207840WA	-0.581674	0.749017	1.84948	0.191436	0.28744
FESUR1	0.581565	6.82654	19.5109	0.000368963	0.00204419
KIC1	0.581508	5.58113	36.972	1.17317e-05	0.00017196
CAALFM_C304100WA	-0.581229	0.884127	1.99304	0.175891	0.269117
HXK1	0.581185	2.552	4.71181	0.0427175	0.0863571
CAALFM_C207520CA	0.58038	3.94355	28.7486	5.00841e-05	0.00044875
CAALFM_C602960WA	-0.579902	2.67584	19.8649	0.000338577	0.00192514
ATP5	-0.579487	7.16891	12.346	0.00229761	0.00857555
CAALFM_C302790WA	-0.579192	3.8651	2.91868	0.105575	0.17824
RPC10	0.579052	3.85159	23.4888	0.000147256	0.00102452
CAALFM_C504960WA	0.578946	7.66835	9.6196	0.00583059	0.0173709
CAALFM_CR03870WA	-0.578934	3.54585	12.9788	0.00216748	0.00816049
CAALFM_C603430CA	0.578909	6.62859	31.651	2.91558e-05	0.000310532
CAALFM_CR09440CA	0.578708	5.86135	30.1479	3.84186e-05	0.000369442
LEU42	0.578134	7.95355	5.5197	0.029666	0.0647698
CAALFM_C210070WA	-0.577703	1.02337	5.24103	0.0349915	0.0736542
CAALFM_C113370WA	-0.577247	3.0545	7.00246	0.0168754	0.0411426
CAALFM_C604120CA	-0.577216	3.57373	11.3511	0.00360269	0.0120402
ATP18	-0.577182	4.74391	17.5808	0.000599194	0.00298805
CAALFM_C503570WA	0.577149	4.63678	21.0495	0.000196753	0.00128176
CAALFM_C110110WA	0.576794	2.88281	14.9017	0.00104009	0.00457806
HNM3	0.576782	4.73654	19.8384	0.000340753	0.00193221
CAALFM_C504980WA	-0.576523	7.96	2.8082	0.110019	0.183791
CAALFM_C105480CA	0.576363	1.77143	7.43959	0.0142355	0.0357159
CAALFM_C109980CA	0.576219	4.88925	8.30261	0.0102865	0.0274828
CAALFM_C405870CA	-0.575973	3.08818	5.80051	0.0275281	0.0609615
CAALFM_CR03700CA	0.575728	6.43137	32.8889	2.33825e-05	0.000268454
GRF10	0.575632	8.67961	5.54064	0.0293939	0.0643384
CAALFM_C302890CA	0.575482	1.94077	5.02627	0.0384547	0.0795574
MDS3	0.575403	7.20803	9.97345	0.0051372	0.0158364
QCR7	0.575319	5.25064	5.32723	0.0337032	0.0714137
GAT1	0.575083	4.97472	16.4128	0.000815172	0.00380141
[truncated: 4,040 more rows]

## Sheet: 2-PHO4_reg_CAF2_adh1_wPa_ca
Assembly.19	Assembly.22	Alias	logFC_CAF2_adh1	GO.PROCESS	GO.FUNCTION	GO.COMPARTMENT	p.value.pho4.Pi.vs..WT.Pi.	FoldChange.pho4.Pi.vs..WT.Pi.	FoldChange.pho4.Pi.vs..WT.Pi...Description.	WT.Pi.vs..WT.Pi	pho4.Pi.vs..pho4.Pi	pho4.Pi.vs..WT.Pi	t.rRNA.ORF	Characterization.Status	S.Cerevisiae	Information
orf19.1171	C1_11490C_A	BTA1	-1.40459	-	-	-	0.000239329	-1028.14	pho4-Pi down vs WT-Pi	378.789	1.16667	-3.16667	ORF	Uncharacterized		Ortholog of C. dubliniensis CD36 : Cd36_10780, C. parapsilosis CDC317 : CPAR2_208080, Candida tenuis NRRL Y-1498 : CANTEDRAFT_120956 and Debaryomyces hansenii CBS767 : DEHA2F24508g
orf19.4424	C1_07430W_A	PHO100	-1.45032	-	phosphatase activity	extracellular region	0.000255069	-807.286	pho4-Pi down vs WT-Pi	847.65	-1.28571	1.35	ORF	Verified		Putative inducible acid phosphatase; DTT-extractable and observed in culture supernatant in low-phosphate conditions; slight effect on murine virulence; virulence-group-correlated expression; N-glycosylated; F-12/CO2 early biofilm induced
orf19.655	C1_11480W_A	PHO84	0.0311003	phosphate accumulation	-	-	0.00012182	-245.652	pho4-Pi down vs WT-Pi	289.744	2	-1.69565	ORF	Uncharacterized	PHO84	High-affinity phosphate transporter; transcript regulated by white-opaque switch; Hog1, ciclopirox olamine or alkaline induced; caspofungin, stress repressed; upregulated in RHE model; Spider and flow model biofilm induced, Hap43-induced
orf19.3727	CR_02400W_A	PHO112	-1.01468	phosphate accumulation	phosphatase activity	extracellular region	0.000187603	-64.8235	pho4-Pi down vs WT-Pi	42.3846	-1.76471	1.15385	ORF	Verified		Putative constitutive acid phosphatase; Rim101-repressed; DTT-extractable; N-glycosylated; Hap43-induced; possibly an essential gene, disruptants not obtained by UAU1 method
orf19.689	C6_01990W_A	PLB1	-1.03699	single-organism metabolic process	hydrolase activity	extracellular region	0.000324426	-37.7353	pho4-Pi down vs WT-Pi	320.75	1.25926	6.75	ORF	Verified		Phospholipase B; host cell penetration and virulence in mouse systemic infection; Hog1-induced; signal sequence, N-glycosylation, and Tyr phosphorylation site; induced in fluconazole-resistant strains; rat catheter biofilm repressed
orf19.4189	C4_00530C_A	C4_00530C_A	-2.1769	-	hydrolase activity	-	0.000327596	-37	pho4-Pi down vs WT-Pi	55.5	?	?	ORF	Uncharacterized		Has domain(s) with predicted hydrolase activity
orf19.2619	CR_02180W_A	PHO113	-1.15355	phosphate accumulation	phosphatase activity	extracellular region	0.000208752	-31.7833	pho4-Pi down vs WT-Pi	26.4861	1.2766	-1.53191	ORF	Verified	PHO11	Putative constitutive acid phosphatase; Rim101-repressed; DTT-extractable; N-glycosylated; possibly an essential gene, disruptants not obtained by UAU1 method
orf19.762	C1_04800C_A	C1_04800C_A	-1.05985	-	-	-	0.00037092	-28.0625	pho4-Pi down vs WT-Pi	149.667	1.33333	4	ORF	Uncharacterized		Ortholog of C. parapsilosis CDC317 : CPAR2_105580, C. dubliniensis CD36 : Cd36_04550, Lodderomyces elongisporus NRLL YB-4239 : LELG_03202 and Candida orthopsilosis Co 90-125 : CORT_0B06800
orf19.2681	C4_03100W_A	RBT7	-0.072306	-	hydrolase activity	extracellular region	0.000259397	-28	pho4-Pi down vs WT-Pi	58.8	1.5	1.4	ORF	Uncharacterized		Protein with similarity to RNase T2 enzymes; has putative secretion signal; expression is Tup1-repressed
orf19.34	C2_06590C_A	GIT1	-2.59477	-	-	-	0.000287385	-25.6612	pho4-Pi down vs WT-Pi	30.1456	1.22222	-1.0404	ORF	Verified	GIT1	Glycerophosphoinositol permease; involved in utilization of glycerophosphoinositol as a phosphate source; Rim101-repressed; virulence-group-correlated expression
orf19.7596	CR_10200W_A	CR_10200W_A	-0.926239	-	-	-	0.000313199	-21.9524	pho4-Pi down vs WT-Pi	32.9286	1.10526	1.35714	ORF	Uncharacterized		Protein with a phosphoglycerate mutase family domain; Hap43-repressed gene
orf19.4664	C4_01250W_A	NAT4	-2.90474	single-organism metabolic process	-	-	0.00606056	-20.5	pho4-Pi down vs WT-Pi	10.25	-3.25	1.625	ORF	Verified	NAT4	Putative histone acetyltransferase; involved in regulation of white-opaque switch; early-stage flow model biofilm induced; Spider biofilm induced
orf19.1691	C3_01540W_A	C3_01540W_A	-2.85103	-	-	mitochondrion	0.00702695	-20.1395	pho4-Pi down vs WT-Pi	66.6154	-11.6977	38.6923	ORF	Verified		Plasma-membrane-localized protein; filament induced; Hog1, ketoconazole, fluconazole and hypoxia-induced; regulated by Nrg1, Tup1, Upc2; induced by prostaglandins; flow model biofilm induced; rat catheter and Spider biofilm repressed
orf19.4555	C6_04130C_A	ALS4	-0.734831	-	-	extracellular region	8.58e-05	-18.348	pho4-Pi down vs WT-Pi	9.15075	-1.12853	-1.77672	ORF	Verified		GPI-anchored adhesin; role in adhesion, germ tube induction; growth, temperature regulated; expressed during infection of human buccal epithelial cells; repressed by vaginal contact; biofilm induced; repressed during chlamydospore formation
orf19.2179	C2_08050C_A	SIT1	-1.07759	-	-	-	0.000103531	-14.6333	pho4-Pi down vs WT-Pi	2.29843	-8.1	1.27225	ORF	Verified	ARN1	Transporter of ferrichrome siderophores, not ferrioxamine B; required for human epithelial cell invasion in vitro, not for mouse systemic infection; regulated by iron, Sfu1, Rfg1, Tup1, Hap43; rat catheter and Spider biofilm induced
orf19.2591	CR_01920W_A	CR_01920W_A	-0.771753	cellular response to DNA damage stimulus	ion binding	-	0.0016007	-11.3333	pho4-Pi down vs WT-Pi	9.71429	3	-3.5	ORF	Uncharacterized	BIO3	Ortholog(s) have adenosylmethionine-8-amino-7-oxononanoate transaminase activity and role in biotin biosynthetic process
orf19.6824	C3_06790W_A	TRY6	-0.0630906	-	-	-	2.62e-05	-11.1429	pho4-Pi down vs WT-Pi	31.2	1.27273	2.2	ORF	Verified		Helix-loop-helix transcription factor; regulator of yeast form adherence; required for yeast cell adherence to silicone substrate; Spider and F-12/CO2 biofilm induced; repressed by alpha pheromone in SpiderM medium
orf19.4026	C5_05320C_A	HIS1	5.043	phosphate accumulation	ion binding	-	9.49e-11	-10.4545	pho4-Pi down vs WT-Pi	3.2243	-2.27273	-1.42667	ORF	Verified	HIS1	ATP phosphoribosyl transferase; enzyme of histidine biosynthesis; acid upregulated/alkaline repressed by Rim101; regulated by Gcn2, Gcn4; strain CA9 is a his1 mutant; flow model biofilm induced; Spider biofilm repressed
orf19.1632	C3_02140C_A	C3_02140C_A	-0.651393	-	-	-	0.00010583	-10.3077	pho4-Pi down vs WT-Pi	14.8889	-2.8	4.04444	ORF	Uncharacterized		Ortholog(s) have cytosol, nucleus localization
orf19.5779	C2_03160C_A	RNR1	-1.94178	cellular response to stress	oxidoreductase activity	-	0.00316546	-10.1609	pho4-Pi down vs WT-Pi	18.0955	-5.75394	10.2472	ORF	Verified	RNR1	Ribonucleotide reductase large subunit; induced in low iron; transposon mutation affects filamentous growth; farnesol upregulated in biofilm; regulated by cell cycle, tyrosol, cell density; regulated by Sef1, Sfu1, and Hap43
orf19.2990	C1_02990C_A	XOG1	-0.227797	carbohydrate metabolic process	hydrolase activity	extracellular region	2.02e-05	-9.61184	pho4-Pi down vs WT-Pi	16.2333	-1.76316	2.97778	ORF	Verified	EXG1	Exo-1,3-beta-glucanase; 5 glycosyl hydrolase family member; affects sensitivity to chitin and glucan synthesis inhibitors; not required for yeast-to-hypha transition or for virulence in mice; Hap43-induced; Spider biofilm induced
orf19.787.1	C4_03960W_A	C4_03960W_A	0.385352	-	-	-	0.000155188	-9.57143	pho4-Pi down vs WT-Pi	3.10825	-1.77778	-1.73214	ORF	Uncharacterized		Protein of unknown function; ORF added to Assembly 21 based on comparative genome analysis; protein detected by mass spec in stationary phase cultures
orf19.6037	C1_00680W_A	ASM3	-0.274332	-	hydrolase activity	-	0.000266033	-9.48357	pho4-Pi down vs WT-Pi	40.4	1.04926	4.06	ORF	Uncharacterized		Putative secreted acid sphingomyelin phosphodiesterase; possible Kex2 substrate; transcript increased in an azole-resistant strain that overexpresses MDR1; flow model biofilm induced; F-12/CO2 early biofilm induced
orf19.1442	C2_01380W_A	PLB4.5	-0.258236	single-organism metabolic process	hydrolase activity	extracellular region	0.000456074	-9.40659	pho4-Pi down vs WT-Pi	7.96279	-3.65385	3.09302	ORF	Verified		Phospholipase B; Hog1-induced; regulated by Ssn6; putative GPI-anchor; repressed during cell wall regeneration; clade-associated gene expression; Hap43-induced; rat catheter and Spider biofilm repressed
orf19.4355	CR_03840C_A	CR_03840C_A	-0.320779	-	-	-	0.000812051	-9.25	pho4-Pi down vs WT-Pi	12.3333	-2	2.66667	ORF	Uncharacterized		Ortholog of C. dubliniensis CD36 : Cd36_29080, C. parapsilosis CDC317 : CPAR2_202490, Candida tenuis NRRL Y-1498 : CANTEDRAFT_112323 and Debaryomyces hansenii CBS767 : DEHA2F19184g
orf19.4476	C1_04010C_A	C1_04010C_A	0.532481	-	-	-	0.00034154	-9.10714	pho4-Pi down vs WT-Pi	5.1	-1.19048	-1.5	ORF	Uncharacterized		Protein with a NADP-dependent oxidoreductase domain; transcript induced by ketoconazole; rat catheter and Spider biofilm induced
orf19.657	C1_11450C_A	SAM2	0.502246	cellular response to DNA damage stimulus	ion binding	-	0.000179322	-8.85524	pho4-Pi down vs WT-Pi	4.96687	-3.68053	2.0644	ORF	Verified	SAM2	S-adenosylmethionine synthetase; localizes to surface of hyphae, not yeast cells; alkaline, Hog1-induced; farnesol-downregulated; F-12/CO2 early biofilm induced; Spider biofilm repressed
orf19.1097	C6_04380W_A	ALS2	-0.222248	-	-	-	4.08e-05	-8.66517	pho4-Pi down vs WT-Pi	6.87429	-1.29364	1.02628	ORF	Verified		ALS family protein; role in adhesion, biofilm formation, germ tube induction; expressed at infection of human buccal epithelial cells; putative GPI-anchor; induced by ketoconazole, low iron and at cell wall regeneration; regulated by Sfu1p
orf19.5437	C3_00320W_A	RHR2	-0.306162	cellular response to stress	phosphatase activity	-	5.51e-07	-8.27083	pho4-Pi down vs WT-Pi	3.37012	-3.075	1.25297	ORF	Verified	GPP1	Glycerol 3-phosphatase; roles in osmotic tolerance, glycerol accumulation in response to salt; Spider/flow model biofilm induced; regulated by macrophage, stress, yeast-hyphal switch, pheromone, Gcn4, Hog1, Nrg1, Tup1
orf19.4447	C1_07200W_A	YMC1	-0.0852262	-	-	mitochondrion	0.000227338	-7.89474	pho4-Pi down vs WT-Pi	3.125	-6.94737	2.75	ORF	Uncharacterized	YMC1	Putative inner mitochondrial membrane transporter; flucytosine induced; Spider biofilm repressed
orf19.5353	C2_10730W_A	C2_10730W_A	0.637225	-	-	-	8.31e-05	-7.8	pho4-Pi down vs WT-Pi	2.16667	-2.8	-1.28571	ORF	Uncharacterized		Ortholog of C. parapsilosis CDC317 : CPAR2_407790, C. dubliniensis CD36 : Cd36_24630, Candida orthopsilosis Co 90-125 : CORT_0C07130 and Spathaspora passalidarum NRRL Y-27907 : SPAPADRAFT_149801
orf19.1868	C2_07570W_A	RNR22	-1.59453	oxidation-reduction process	oxidoreductase activity	-	4.72e-06	-7.25	pho4-Pi down vs WT-Pi	2.79259	-2.99573	1.15391	ORF	Uncharacterized		Putative ribonucleoside diphosphate reductase;colony morphology-related gene regulation by Ssn6; transcript regulated by tyrosol and cell density; Hap43-repressed; Spider biofilm induced
orf19.1258	C4_05730W_A	C4_05730W_A	-0.69901	-	-	-	6.09e-11	-7.05882	pho4-Pi down vs WT-Pi	10	1.0625	1.33333	ORF	Uncharacterized		Adhesin-like protein; regulated by Tsa1, Tsa1B in minimal media at 37 deg; clade-associated gene expression; induced by alpha pheromone in SpiderM medium; Hap43-induced; Spider biofilm repressed
orf19.4612	C4_01800W_A	C4_01800W_A	-3.56252	-	hydrolase activity	-	0.00206677	-7	pho4-Pi down vs WT-Pi	5.6	-2.875	2.3	ORF	Uncharacterized		Protein with a dienelactone hydrolase domain; Hap43-repressed gene
orf19.5141	C7_03140W_A	C7_03140W_A	-0.668311	-	-	-	0.00117263	-6.23077	pho4-Pi down vs WT-Pi	5.0625	-1.07692	-1.14286	ORF	Uncharacterized		Ortholog of Candida albicans WO-1
orf19.1048	C1_04140W_A	IFD6	-0.151707	-	oxidoreductase activity	-	0.000110158	-6.2082	pho4-Pi down vs WT-Pi	2.62051	1.03934	-2.4623	ORF	Verified		Aldo-keto reductase; similar to aryl alcohol dehydrogenases; protein increase correlates with MDR1 overexpression (not CDR1 or CDR2) in fluconazole-resistant clinical isolates; farnesol regulated; possibly essential; Spider biofilm induced
orf19.2593	CR_01930C_A	BIO2	-0.677403	cellular response to DNA damage stimulus	-	mitochondrion	0.00133931	-6.10185	pho4-Pi down vs WT-Pi	9.69118	2.4	-1.51111	ORF	Uncharacterized	BIO2	Putative biotin synthase; induced by high iron; repressed by ciclopirox olamine; upregulated in clinical isolates from HIV+ patients with oral candidiasis; Hap43-repressed; Spider biofilm induced
orf19.5912	C3_04560W_A	MAK21	0.105526	-	-	-	0.000172554	-5.77561	pho4-Pi down vs WT-Pi	2.08818	-2.77073	1.00176	ORF	Verified	MAK21	Putative 66S pre-ribosomal particle subunit; mutation confers hypersensitivity to tubercidin (7-deazaadenosine)
orf19.1979	C5_00880C_A	GIT3	0.0782352	-	-	-	0.000162427	-5.63741	pho4-Pi down vs WT-Pi	10.3651	1.12097	1.64021	ORF	Verified		Glycerophosphocholine permease; white cell specific transcript; fungal-specific; alkaline repressed; caspofungin, macrophage/pseudohyphal-repressed; flow model biofilm induced; Spider biofilm induced
orf19.265	C3_02750W_A	C3_02750W_A	-1.23994	-	hydrolase activity	-	0.00169603	-5.52083	pho4-Pi down vs WT-Pi	66.25	3.2	3.75	ORF	Uncharacterized		Protein with a ribonuclease III domain; flow model biofilm induced; Spider biofilm induced
orf19.508	CR_04210C_A	QDR1	-1.51532	-	-	-	0.000181825	-5.51948	pho4-Pi down vs WT-Pi	2.62346	-2.42857	1.15432	ORF	Verified	QDR1	Putative antibiotic resistance transporter; regulated by white-opaque switch, Nrg1, Tup1; Hap43, caspofungin repressed; repressed during chlamydospore formation; flow model biofilm induced; Spider biofilm repressed
orf19.2397	CR_03270W_A	CR_03270W_A	-1.72778	-	-	-	0.00159854	-5.51429	pho4-Pi down vs WT-Pi	4.94872	1.4	-1.56	ORF	Uncharacterized		Predicted membrane transporter, member of the anion:cation symporter (ACS) family, major facilitator superfamily (MFS); amphotericin B, caspofungin repressed; Hap43p-repressed
orf19.2308	C1_11080W_A	C1_11080W_A	-0.81323	carbohydrate metabolic process	ion binding	-	0.000289814	-5.34363	pho4-Pi down vs WT-Pi	7.68889	-1.1583	1.66667	ORF	Uncharacterized	PFK27	Putative 6-phosphofructo-2-kinase; catalyzes synthesis of fructose-2,6-bisphosphate; Hap43-repressed; flow model, rat catheter and Spider biofilm induced
orf19.1344	C7_03310W_A	C7_03310W_A	0.91243	-	-	-	0.00243129	-5.15385	pho4-Pi down vs WT-Pi	134	-2	52	ORF	Uncharacterized		Protein of unknown function; fluconazole-induced; Spider biofilm induced
orf19.5620	C6_03320W_A	C6_03320W_A	-0.649566	cellular response to stress	-	-	0.0020185	-5.01505	pho4-Pi down vs WT-Pi	9.34669	-1.68602	3.14228	ORF	Uncharacterized	YHI9	Stationary phase enriched protein; Gcn4-regulated; induced by amino acid starvation (3-AT), benomyl or in azole-resistant strain that overexpresses MDR1; flow model biofilm induced; rat catheter biofilm repressed; overlaps orf19.5621
orf19.4212	C6_00470C_A	FET99	-2.25066	oxidation-reduction process	oxidoreductase activity	-	7.2e-07	-4.93195	pho4-Pi down vs WT-Pi	21.3718	1.68159	2.57692	ORF	Verified		Multicopper oxidase family protein; similar to S. cerevisiae Fet3; does not complement S. cerevisiae fet3 mutant growth under low-iron; iron-repressed; regulated by Tup1, Rim101; flow model biofilm induced; Spider biofilm repressed
orf19.3305	C1_01170C_A	ZCF17	0.924587	-	ion binding	-	1.88e-05	-4.83051	pho4-Pi down vs WT-Pi	3.8	-1.61017	1.26667	ORF	Verified		Putative Zn(II)2Cys6 transcription factor
orf19.3618	C2_08590W_A	YWP1	-0.949438	-	-	extracellular region	1.51e-06	-4.82647	pho4-Pi down vs WT-Pi	2.4563	-2.5647	1.30523	ORF	Verified		Secreted yeast wall protein; possible role in dispersal in host; mutation increases adhesion and biofilm formation; propeptide; growth phase, phosphate, Ssk1/Ssn6/Efg1/Efh1/Hap43 regulated; mRNA binds She3; flow and Spider biofilm repressed
orf19.5612	C6_03250W_A	BMT4	-0.709781	carbohydrate metabolic process	-	-	1.29e-06	-4.51417	pho4-Pi down vs WT-Pi	9.06504	1.37222	1.46341	ORF	Verified		Beta-mannosyltransferase; for elongation of beta-mannose chains on the acid-labile fraction of cell wall phosphopeptidomannan; 9-gene family member; regulated by Tsa1, Tsa1B; flow model biofilm induced; rat catheter biofilm repressed
orf19.54	C1_05000W_A	RHD1	-0.287929	carbohydrate metabolic process	-	-	1.07e-09	-4.46753	pho4-Pi down vs WT-Pi	4.26006	-1.47403	1.40557	ORF	Verified		Putative beta-mannosyltransferase required for the addition of beta-mannose to the acid-labile fraction of cell wall phosphopeptidomannan; 9-gene family memebr; regulated on yeast-hypha and white-opaque switches; Spider biofilm repressed
orf19.2220	C2_08260W_A	C2_08260W_A	0.734016	-	-	-	0.000176408	-4.32075	pho4-Pi down vs WT-Pi	5.32558	-1.09434	1.34884	ORF	Uncharacterized		Protein of unknown function; Hap43-repressed gene; by Rgt1; repressed in Spider biofilms by Bcr1, Tec1, Brg1, Rob1 and induced by Efg1, Ndt80; Spider biofilm induced
orf19.3282	CR_00740C_A	BMT3	-0.0242315	carbohydrate metabolic process	-	-	0.000177604	-4.27922	pho4-Pi down vs WT-Pi	11.5614	1.07692	2.50877	ORF	Verified		Beta-mannosyltransferase; adds 2nd beta-mannose to the acid-stable fraction of cell wall phosphopeptidomannan, elongation of beta-mannose chains on the phosphopeptidomannan acid-labile fraction; Hap43-induced; Spider biofilm induced
orf19.7251	C1_14360C_A	WSC4	0.431716	-	-	-	0.000131721	-4.26705	pho4-Pi down vs WT-Pi	3.25108	-2.01705	1.5368	ORF	Uncharacterized	WSC4	Putative cell wall integrity and stress response subunit 4 precursor; transcription is specific to white cell type
orf19.5784	C2_03120W_A	AMO1	-0.30472	oxidation-reduction process	oxidoreductase activity	-	0.000117433	-4.25455	pho4-Pi down vs WT-Pi	4.10526	-1.10909	1.07018	ORF	Uncharacterized		Putative peroxisomal copper amine oxidase
orf19.768	C1_04760C_A	SYG1	0.177916	-	-	mitochondrion	0.000124963	-4.15385	pho4-Pi down vs WT-Pi	2.88	-1.44231	1	ORF	Uncharacterized	SYG1	Ortholog(s) have role in signal transduction and Golgi apparatus, endoplasmic reticulum, mitochondrion, plasma membrane localization
orf19.2877	C4_06570C_A	PDC11	-1.52752	pyridine-containing compound metabolic process	ion binding	-	0.00458221	-4.12281	pho4-Pi down vs WT-Pi	3.49332	-2.63114	2.22941	ORF	Verified	PDC1	Pyruvate decarboxylase; antigenic; on hyphal not yeast cell surface; Hap43, Gcn4, Efg1, Efh1, Hsf1 regulated; fluconazole, farnesol induced; amino acid starvation repressed; flow model biofilm induced; Spider biofilm repressed
orf19.6782	C3_07180C_A	BMT1	-1.28292	carbohydrate metabolic process	-	-	0.000110147	-4.08571	pho4-Pi down vs WT-Pi	2.91837	-1.34286	-1.04255	ORF	Verified		Beta-mannosyltransferase, required for addition of the 1st beta-mannose residue to acid-stable fraction of cell wall phosphopeptidomannan; 9-gene family member; mutants induce higher levels of inflammatory cytokines in mouse dendritic cells
orf19.7127.1	C7_04340C_A	C7_04340C_A	0.708376	-	-	-	0.00563377	-4	pho4-Pi down vs WT-Pi	3.33333	-1.4	1.16667	ORF	Uncharacterized		Putative protein of unknown function, transcript is upregulated in an RHE model of oral candidiasis
orf19.3575	C2_05460W_A	CDC19	-1.31936	cellular response to stress	ion binding	-	0.00939398	-3.9892	pho4-Pi down vs WT-Pi	11.1291	-2.10134	5.86235	ORF	Verified	CDC19	Pyruvate kinase at yeast cell surface; Gcn4/Hog1/GlcNAc regulated; Hap43/polystyrene adherence induced; repressed by phagocytosis/farnesol; hyphal growth role; stationary phase enriched; flow model biofilm induced; Spider biofilm repressed
orf19.7313	CR_09170C_A	SSU1	-0.133484	cellular response to stress	-	-	0.00221357	-3.90323	pho4-Pi down vs WT-Pi	20.1667	-1.29032	6.66667	ORF	Verified	SSU1	Protein similar to S. cerevisiae Ssu1 sulfite transport protein; Tn mutation affects filamentous growth; regulated by Gcn2 and Gcn4; induced by nitric oxide; Hap43-repressed; Spider and flow model biofilm induced
orf19.413	C1_05520W_A	C1_05520W_A	-0.241395	-	-	-	0.00018379	-3.90141	pho4-Pi down vs WT-Pi	3.50633	1.20339	-1.33898	ORF	Uncharacterized		Protein of unknown function; induced by Sfu1; Spider biofilm induced
orf19.5356	C2_10740C_A	C2_10740C_A	0.703856	-	-	-	0.000135351	-3.82275	pho4-Pi down vs WT-Pi	2.66605	-1.94974	1.35978	ORF	Uncharacterized	EMW1	Protein with a predicted role in cell wall integrity; repressed in core stress response
orf19.7394	C3_06120C_A	GDA1	-0.391277	carbohydrate metabolic process	hydrolase activity	-	0.000845056	-3.79487	pho4-Pi down vs WT-Pi	2.1244	-3.12821	1.7512	ORF	Verified	GDA1	Golgi membrane GDPase, required for wild-type O-mannosylation, not N-glycosylation; required for wild-type hyphal induction, cell wall, and cell surface charge; not required for HeLa cell adherence; functional homolog of S. cerevisiae Gda1p
orf19.769	C1_04750W_A	IFE1	-0.473194	oxidation-reduction process	oxidoreductase activity	-	0.000349804	-3.77381	pho4-Pi down vs WT-Pi	7.54762	-1.38095	2.7619	ORF	Uncharacterized	BDH2	Putative medium-chain alcohol dehydrogenase; rat catheter and Spider biofilm repressed
orf19.6630	CR_05800C_A	CR_05800C_A	-0.448197	-	-	-	0.0128297	-3.7037	pho4-Pi down vs WT-Pi	12.5	-1.85185	6.25	ORF	Uncharacterized	LCL2	Ortholog(s) have role in ER-associated ubiquitin-dependent protein catabolic process
orf19.3538	C2_05070W_A	FRE9	-0.55819	oxidation-reduction process	oxidoreductase activity	-	5.42e-06	-3.66667	pho4-Pi down vs WT-Pi	3.18421	-2.09091	1.81579	ORF	Uncharacterized		Ferric reductase; alkaline induced; ciclopirox olamine; Hap43-induced
orf19.1448	C2_01430W_A	APT1	-0.680821	single-organism metabolic process	-	-	0.000112907	-3.6087	pho4-Pi down vs WT-Pi	2.86207	-1.75652	1.3931	ORF	Uncharacterized	APT1	Adenine phosphoribosyltransferase; flucytosine induced; repressed by nitric oxide; protein level decreased in stationary phase yeast cultures
orf19.4128	C2_04830W_A	C2_04830W_A	-0.461812	-	-	-	1.24e-05	-3.525	pho4-Pi down vs WT-Pi	4.02857	-1.25	1.42857	ORF	Uncharacterized		Ortholog of C. dubliniensis CD36 : Cd36_19390, C. parapsilosis CDC317 : CPAR2_209600, Candida tenuis NRRL Y-1498 : CANTEDRAFT_134010 and Debaryomyces hansenii CBS767 : DEHA2C14960g
orf19.7475	CR_00590W_A	PHO81	-0.0747597	phosphate accumulation	hydrolase activity	-	0.000728761	-3.52009	pho4-Pi down vs WT-Pi	8.55747	1.11316	2.18391	ORF	Verified	PHO81	Protein involved in regulation of hyphal development; required for response to farnesoic acid; possibly adherence-induced
orf19.1901	C2_07350W_A	MCM3	-2.49383	cellular response to stress	hydrolase activity	protein-DNA complex	7.93e-06	-3.48684	pho4-Pi down vs WT-Pi	6.50307	-1.75	3.2638	ORF	Uncharacterized	MCM3	Putative DNA replication protein; periodic mRNA expression, peak at cell-cycle M/G1 phase; Spider biofilm induced
orf19.1509	C2_01970C_A	ROD1	-0.366126	-	-	-	0.000362285	-3.48454	pho4-Pi down vs WT-Pi	3.2657	-1.22165	1.14493	ORF	Uncharacterized		Protein similar to S. cerevisiae Rod1;a membrane protein with a role in drug tolerance; repressed by Rgt1; mutant is viable
orf19.2594	CR_01950W_A	CR_01950W_A	0.0676743	-	-	-	0.000363042	-3.44186	pho4-Pi down vs WT-Pi	2.22556	-2.11628	1.36842	ORF	Uncharacterized	RPA43	Ortholog(s) have RNA polymerase I activity, role in transcription of nuclear large rRNA transcript from RNA polymerase I promoter and DNA-directed RNA polymerase I complex, cytosol localization
orf19.391	C1_08460C_A	UPC2	0.564783	cellular response to stress	ion binding	-	0.00476739	-3.43956	pho4-Pi down vs WT-Pi	6.13725	-2.14286	3.82353	ORF	Verified	UPC2	Zn2-Cys6 transcript factor; regulator of ergosterol biosynthetic genes and sterol uptake; binds ERG2 promoter; induced by ergosterol depletion, by azoles, anaerobicity; macrophage/pseudohyphal-repressed; flow model biofilm induced
orf19.1007	CR_05260C_A	KCS1	0.0373432	single-organism metabolic process	-	-	0.000139442	-3.42105	pho4-Pi down vs WT-Pi	7.5	-1.06433	2.33333	ORF	Uncharacterized	KCS1	Putative bZIP transcription factor; Spider biofilm induced
orf19.5818	C2_02860W_A	SUR2	-0.0121594	oxidation-reduction process	oxidoreductase activity	-	1.67e-05	-3.39353	pho4-Pi down vs WT-Pi	3.30446	-1.54447	1.50394	ORF	Uncharacterized	SUR2	Putative ceramide hydroxylase; predicted enzyme of sphingolipid biosynthesis; regulated by Tsa1, Tsa1B under H2O2 stress conditions; Spider and flow model biofilm induced
orf19.6826	C3_06780C_A	SLF1	-0.131023	-	-	-	0.000101031	-3.35714	pho4-Pi down vs WT-Pi	2.76471	-1.75	1.44118	ORF	Uncharacterized		Putative polysome-associated RNA binding protein; macrophage-induced gene
orf19.1971	C5_00980W_A	TRY3	0.204948	-	ion binding	-	7.47e-06	-3.33628	pho4-Pi down vs WT-Pi	5.16438	-1.55752	2.41096	ORF	Verified		RING-finger transcription factor; regulator of yeast form adherence; required for yeast cell adherence to silicone substrate; Spider biofilm induced
orf19.6317	CR_04740C_A	ADE6	-0.481972	single-organism metabolic process	-	-	0.000358539	-3.33153	pho4-Pi down vs WT-Pi	2.94498	-2.57916	2.2799	ORF	Uncharacterized	ADE6	5-Phosphoribosylformyl glycinamidine synthetase; adenine biosynthesis; not induced in GCN response, in contrast to S. cerevisiae Ade6; protein in stationary phase yeast-form cultures; flow model and rat catheter biofilm repressed
orf19.1720	C3_01310W_A	C3_01310W_A	-1.78273	DNA metabolic process	hydrolase activity	-	0.00228438	-3.30159	pho4-Pi down vs WT-Pi	6.30303	-1.5873	3.0303	ORF	Uncharacterized	IRC5	Ortholog(s) have role in mitotic recombination
orf19.5455	C3_00170C_A	C3_00170C_A	-0.690356	-	-	-	0.000436715	-3.21154	pho4-Pi down vs WT-Pi	3.51579	-1.25	1.36842	ORF	Uncharacterized	VTC1	Ortholog(s) have mRNA binding, small GTPase regulator activity
orf19.2590	CR_01910C_A	CR_01910C_A	0.135004	cellular response to DNA damage stimulus	ion binding	-	0.00699715	-3.2	pho4-Pi down vs WT-Pi	8	-1.4	3.5	ORF	Uncharacterized	BIO4	Putative dethiobiotin synthetase; transcript upregulated in clinical isolates from HIV+ patients with oral candidiasis; Hap43-repressed; GlcNAc-induced protein; Spider biofilm induced
orf19.658	C1_11440C_A	GIN1	-0.816678	cellular response to stress	-	nuclear chromosome part	0.00598068	-3.2	pho4-Pi down vs WT-Pi	8	-2.07273	5.18182	ORF	Verified	MRC1	Protein involved in regulation of DNA-damage-induced filamentous growth; putative component of DNA replication checkpoint; ortholog of S. cerevisiae Mrc1p, an S-phase checkpoint protein; Hap43p-induced gene
orf19.5873	C3_04300C_A	POL1	-1.36581	cellular response to stress	-	mitochondrion	0.00204152	-3.19126	pho4-Pi down vs WT-Pi	8.71642	-1.74317	4.76119	ORF	Uncharacterized	POL1	Putative DNA directed DNA polymerase alpha; RNA abundance regulated by cell cycle, tyrosol and cell density; rat catheter biofilm induced
orf19.7517	CR_00180C_A	CHT1	0.101609	carbohydrate metabolic process	hydrolase activity	extracellular region	0.0087271	-3.125	pho4-Pi down vs WT-Pi	4.41176	-3.20833	4.52941	ORF	Verified		Chitinase; putative N-terminal catalytic domain; has secretory signal sequence; lacks S/T region and N-glycosylation motifs of Chs2p and Chs3p; alkaline downregulated; expression not detected in yeast-form or hyphal cells
orf19.2527	CR_01410C_A	CR_01410C_A	-0.61341	-	-	-	0.00154198	-3.12329	pho4-Pi down vs WT-Pi	2.4127	-1.86301	1.43915	ORF	Verified	YNL035C	Putative protein of unknown function; Hap43-induced; required for normal biofilm growth; F-12/CO2 early biofilm induced
orf19.4279	C5_02630C_A	MNN1	-0.157501	carbohydrate metabolic process	-	-	0.00106367	-3.12274	pho4-Pi down vs WT-Pi	18.0373	1.7631	3.27612	ORF	Uncharacterized		Putative alpha-1,3-mannosyltransferase; of the mannosyltransferase complex; negatively regulated by Rim101; transcript elevated in chk1 and nik1 mutants, but not in sln1 mutant; Spider and flow model biofilm induced
orf19.787	C4_03950C_A	C4_03950C_A	0.840906	-	-	-	0.0112467	-3.11111	pho4-Pi down vs WT-Pi	9.33333	-1.44444	4.33333	ORF	Uncharacterized		Protein of unknown function
orf19.4368	CR_03690W_A	CR_03690W_A	-0.00624248	-	hydrolase activity	-	0.00256812	-3.03612	pho4-Pi down vs WT-Pi	6.40476	1.12152	1.88095	ORF	Uncharacterized		Has domain(s) with predicted hydrolase activity and role in cellular process
orf19.3803	C4_04770C_A	MNN22	-1.21418	carbohydrate metabolic process	-	-	0.000938051	-3.00812	pho4-Pi down vs WT-Pi	15.0203	1.25254	3.98649	ORF	Verified		Alpha-1,2-mannosyltransferase; required for normal cell wall mannan; regulated by Tsa1, Tsa1B at 37 deg; repressed in core stress response; NO, Hog1 induced; confers sensitivity to cell wall perturbing agents; Spider biofilm repressed
orf19.1980	C5_00870C_A	GIT4	-2.74236	-	-	-	0.000523034	-3	pho4-Pi down vs WT-Pi	10.8	1	3.6	ORF	Verified		Glycerophosphocholine transporter; fungal-specific (no human or murine homolog); possibly an essential gene, disruptants not obtained by UAU1 method; Hap43p-repressed gene
orf19.7324	CR_09290W_A	THI13	-0.682179	single-organism metabolic process	ion binding	-	0.00107968	-2.93125	pho4-Pi down vs WT-Pi	4.07826	1.25	1.11304	ORF	Verified	THI13	Thiamin pyrimidine synthase; synthesis of the thiamine precursor hydroxymethylpyrimidine phosphate; single-turnover enzyme that provides histidine for HMP-P formation; induced by nitric oxide independent of Yhb1; Spider biofilm induced
orf19.7634	CR_10540C_A	MCD1	-2.65223	cellular response to stress	-	mitochondrion	0.00886482	-2.91667	pho4-Pi down vs WT-Pi	6.36364	-2.66667	5.81818	ORF	Uncharacterized	MCD1	Alpha-kleisin cohesin complex subunit; for sister chromatid cohesion in mitosis and meiosis; repressed by alpha pheromone in SpiderM medium; periodic cell-cycle expression; Hap43-repressed; rat catheter and Spider biofilm repressed
orf19.5342.2	C2_10650W_A	C2_10650W_A	-0.864327	-	-	-	0.000853725	-2.90698	pho4-Pi down vs WT-Pi	4.46429	-1.86047	2.85714	ORF	Uncharacterized		Protein of unknown function; protein newly produced during adaptation to the serum
orf19.5011	C1_13740W_A	KAR9	-0.0367836	-	-	-	2.78e-05	-2.81197	pho4-Pi down vs WT-Pi	2.19333	-1.24786	-1.0274	ORF	Verified	KAR9	Ortholog of S. cerevisiae Kar9; role in mitotic spindle positioning; nonessential; localizes to bud tip, bud neck, hyphal tip; wild-type localization requires actin and microtubule cytoskeleton; induced by alpha factor
orf19.6654	C5_03470C_A	C5_03470C_A	0.615483	-	-	-	7.74e-09	-2.79447	pho4-Pi down vs WT-Pi	3.68229	-1.22925	1.61979	ORF	Uncharacterized		Predicted membrane transporter, member of the L-amino acid transporter-3 (LAT3) family, major facilitator superfamily (MFS)
orf19.1889	C2_07420W_A	C2_07420W_A	-0.452741	-	phosphatase activity	-	0.00871918	-2.68966	pho4-Pi down vs WT-Pi	2.9771	-1.59655	1.76718	ORF	Uncharacterized	SHB17	Putative phosphoglycerate mutase family protein; stationary phase enriched protein; early-stage flow model biofilm induced; Spider biofilm repressed
orf19.3483	C6_02420W_A	C6_02420W_A	-0.24811	carbohydrate metabolic process	hydrolase activity	mitochondrion	0.000918327	-2.67073	pho4-Pi down vs WT-Pi	4.97727	-1.12195	2.09091	ORF	Verified	PGC1	Putative phosphatidyl glycerol phospholipase C; Plc1-regulated; flow model biofilm induced; Spider biofilm induced
orf19.171	CR_02530W_A	DBP2	0.661596	-	hydrolase activity	mitochondrion	0.00133292	-2.62059	pho4-Pi down vs WT-Pi	2.02961	-1.63529	1.26651	ORF	Uncharacterized	DBP2	Putative DEAD-box family ATP-dependent RNA helicase; flucytosine induced; repressed in core stress response
orf19.691	C6_02010C_A	GPD2	-0.0873719	oxidation-reduction process	oxidoreductase activity	-	0.000145687	-2.56481	pho4-Pi down vs WT-Pi	4.01449	1.00935	1.55072	ORF	Verified		Surface protein similar to glycerol 3-P dehydrogenase; binds host Factor H, FHL-1, plasminogen; regulated by Ssn6, Nrg1, Efg1; induced by cell wall regeneration, macrophage/pseudohyphal growth, core stress response; Spider biofilm induced
orf19.4749	C1_08900W_A	C1_08900W_A	-1.28781	-	-	-	3.97e-05	-2.55195	pho4-Pi down vs WT-Pi	2.41104	1	-1.05844	ORF	Uncharacterized		Protein of unknown function; hyphal-induced expression, regulated by Cyr1, Ras1, Efg1; Hap43-induced gene; Spider biofilm induced
orf19.7196	C7_03860W_A	C7_03860W_A	0.798903	cellular response to stress	hydrolase activity	-	0.0063992	-2.53649	pho4-Pi down vs WT-Pi	2.7883	-1.02062	1.12194	ORF	Uncharacterized	PRB1	Putative vacuolar protease; upregulated in the presence of human neutrophils; Spider biofilm induced
orf19.7564	CR_09900C_A	DPB2	-0.744678	cellular response to stress	structure-specific DNA binding	protein-DNA complex	0.00776617	-2.53125	pho4-Pi down vs WT-Pi	9	-1.84375	6.55556	ORF	Uncharacterized	DPB2	Probable subunit of DNA polymerase II (DNA polymerase epsilon), similar to S. cerevisiae Dpb2p; essential for viability; rat catheter biofilm induced
orf19.288	C3_02950C_A	MET13	0.391289	oxidation-reduction process	oxidoreductase activity	mitochondrion	0.0031955	-2.47273	pho4-Pi down vs WT-Pi	5.03704	1.20548	1.68981	ORF	Uncharacterized	MET13	Putative methionine biosynthesis protein; ketoconazole-induced; amphotericin B repressed; Spider biofilm repressed
orf19.1860	CR_06760C_A	LSC2	-0.568935	cellular response to DNA damage stimulus	ion binding	mitochondrion	0.000126272	-2.46924	pho4-Pi down vs WT-Pi	2.6976	-1.49178	1.62974	ORF	Uncharacterized	LSC2	Putative succinate-CoA ligase beta subunit; regulated by Mig1, Tup1; induced in high iron; protein present in exponential and stationary growth phase yeast cells; Spider biofilm repressed
orf19.4381	CR_03610C_A	VTC3	-0.0721881	phosphate accumulation	-	-	0.000919197	-2.44566	pho4-Pi down vs WT-Pi	5.44302	1.24691	1.78488	ORF	Uncharacterized	VTC2	Putative polyphosphate synthetase; downregulated in core caspofungin response; Hog1p-induced; transcription is opaque-specific; fungal-specific (no human or murine homolog)
orf19.1614	C3_02310W_A	MEP1	0.702358	cellular response to stress	-	-	0.0105311	-2.40278	pho4-Pi down vs WT-Pi	3.88764	2.25	-1.39062	ORF	Verified	MEP3	Ammonium permease; Mep1 more efficient permease than Mep2, Mep2 has additional regulatory role; 11 predicted transmembrane regions; low mRNA abundance; hyphal downregulated; flow model biofilm induced
orf19.3936	C5_04510W_A	GDE1	-0.180832	carbohydrate metabolic process	hydrolase activity	-	0.000942853	-2.38004	pho4-Pi down vs WT-Pi	8.37838	1.16295	3.02703	ORF	Verified	GDE1	Glycerophosphocholine phosphodiesterase; mutation confers hypersensitivity to 5-fluorouracil (5-FU); F-12/CO2 early biofilm induced
orf19.7479	CR_00560W_A	NTH1	0.449237	cellular response to stress	hydrolase activity	-	0.00721609	-2.37924	pho4-Pi down vs WT-Pi	3.35224	-1.37076	1.93134	ORF	Verified	NTH1	Neutral trehalase; hyphal induction in mutant delayed but not reduced overall; not required for virulence in mice; possible regulatory cAMP-dependent phosphorylation at S10,S213; Hap43-repressed gene; Spider biofilm induced
orf19.7016	C7_00980W_A	PHM5	0.16738	oxoacid metabolic process	hydrolase activity	-	0.000734566	-2.35714	pho4-Pi down vs WT-Pi	2.42779	-1.07937	1.11172	ORF	Uncharacterized	PPN1	Ortholog(s) have endopolyphosphatase activity, exopolyphosphatase activity, role in polyphosphate catabolic process and fungal-type vacuole membrane, nucleus localization
orf19.5604	C6_03170C_A	MDR1	0.64463	cellular response to stress	-	-	0.00881645	-2.33333	pho4-Pi down vs WT-Pi	7	-1.77778	5.33333	ORF	Verified	FLR1	Plasma membrane MDR/MFS multidrug efflux pump; methotrexate is preferred substrate; overexpression in drug-resistant clinical isolates confers fluconazole resistance; repressed in young biofilms; rat catheter biofilm induced
orf19.6117	CR_07480W_A	CR_07480W_A	-0.375686	-	-	-	0.000113291	-2.32435	pho4-Pi down vs WT-Pi	4.93173	-1.15913	2.45941	ORF	Uncharacterized	YBR287W	S. pombe ortholog SPAC5D6.04 is a predicted auxin family transmembrane transporter; ketoconazole and hypoxia induced
orf19.5285	CR_05390W_A	PST3	-0.347538	-	ion binding	mitochondrion	0.00466055	-2.31157	pho4-Pi down vs WT-Pi	3.00298	-1.24046	1.61149	ORF	Uncharacterized	PST2	Putative flavodoxin; YNB biofilm induced; stationary phase enriched protein; rat catheter and Spider biofilm repressed
orf19.4788	C1_09290C_A	ARG5,6	NA	oxidation-reduction process	oxidoreductase activity	mitochondrion	0.00661674	-2.29874	pho4-Pi down vs WT-Pi	2.20592	-1.40533	1.34859	ORF	Verified	ARG5,6	Arginine biosynthetic enzyme; processed in S. cerevisiae into 2 polypeptides with acetylglutamate kinase (Arg6) activity and acetylglutamate-phosphate reductase (Arg5) activity; Gcn4 regulated; alkaline repressed; Spider biofilm induced
orf19.4435	C1_07360W_A	C1_07360W_A	-0.481261	-	-	-	0.0106545	-2.21725	pho4-Pi down vs WT-Pi	3.65263	-1.54313	2.54211	ORF	Uncharacterized	STU1	Ortholog(s) have structural constituent of cytoskeleton activity, role in microtubule nucleation and spindle pole body localization
orf19.3249	CR_01060W_A	LAG1	-0.00576305	cellular response to stress	-	-	0.00192555	-2.2069	pho4-Pi down vs WT-Pi	2.01258	-1.31034	1.19497	ORF	Verified	LAG1	Putative ceramide synthase component; Hap43p-repressed gene; amphotericin B repressed
orf19.926	C5_00630C_A	EXO1	-0.0149331	cellular response to stress	hydrolase activity	-	0.0135774	-2.20635	pho4-Pi down vs WT-Pi	3.75676	-2.11111	3.59459	ORF	Uncharacterized	EXO1	Putative exodeoxyribonuclease; cell-cycle regulated periodic mRNA expression
orf19.6291	CR_07600W_A	CR_07600W_A	-0.318955	cellular response to stress	hydrolase activity	mitochondrion	0.00414619	-2.20588	pho4-Pi down vs WT-Pi	2.08978	-1.29412	1.22601	ORF	Uncharacterized	FUN30	Ortholog(s) have DNA binding, DNA-dependent ATPase activity, chromatin binding activity
orf19.3714	CR_07850W_A	CR_07850W_A	0.901026	-	-	-	0.013444	-2.2	pho4-Pi down vs WT-Pi	7.07143	-1.22222	3.92857	ORF	Uncharacterized		Ortholog of C. dubliniensis CD36 : Cd36_33530, C. parapsilosis CDC317 : CPAR2_201980, Candida tenuis NRRL Y-1498 : CANTEDRAFT_134293 and Debaryomyces hansenii CBS767 : DEHA2A10164g
orf19.2324	C1_10930C_A	UBA4	-0.00679334	cellular response to stress	oxidoreductase activity	-	0.00297761	-2.1954	pho4-Pi down vs WT-Pi	2.05376	-1.77586	1.66129	ORF	Uncharacterized	UBA4	Putative ubiquitin activating protein; Hap43-repressed; induced by prostaglandins; clade-associated gene expression
orf19.5925	C3_04650W_A	C3_04650W_A	0.350524	-	-	-	0.00596927	-2.16	pho4-Pi down vs WT-Pi	7.71429	1.41509	2.52381	ORF	Uncharacterized	AIM6	Ortholog of S. cerevisiae : AIM6, C. glabrata CBS138 : CAGL0C05533g, C. dubliniensis CD36 : Cd36_84610, C. parapsilosis CDC317 : CPAR2_404550 and Candida tenuis NRRL Y-1498 : CANTEDRAFT_115337
orf19.1287	C5_04030W_A	C5_04030W_A	-0.152915	-	-	-	5.58e-06	-2.15517	pho4-Pi down vs WT-Pi	2.21061	1.69681	-1.65426	ORF	Uncharacterized		Protein of unknown function; flow model biofilm induced; Spider biofilm induced
orf19.6896	C7_01100C_A	C7_01100C_A	-1.05597	-	-	-	0.0112079	-2.15385	pho4-Pi down vs WT-Pi	6.22222	-1.61538	4.66667	ORF	Uncharacterized		Predicted ORF overlapping the Major Repeat Sequence on chromosome 7; member of a family encoded by FGR6-related genes in the RB2 repeat sequence
orf19.1723	C3_01280W_A	C3_01280W_A	0.111804	-	-	-	0.00987633	-2.14354	pho4-Pi down vs WT-Pi	5.97333	-1.33014	3.70667	ORF	Uncharacterized	YJL055W	Ortholog(s) have role in response to purine-containing compound and cytoplasm, nucleus localization
orf19.3220	C5_03920C_A	C5_03920C_A	-0.167331	-	-	-	0.0154326	-2.12903	pho4-Pi down vs WT-Pi	2.44444	-1.90323	2.18519	ORF	Uncharacterized	FCF1	Putative rRNA processing protein; Spider biofilm induced
orf19.7166	C7_04090C_A	C7_04090C_A	-0.530759	-	-	-	0.00117445	-2.12883	pho4-Pi down vs WT-Pi	5.42188	-1.50307	3.82813	ORF	Uncharacterized		Predicted mitochondrial cardiolipin-specific phospholipase; upregulated in an azole-resistant strain that overexpresses MDR1; induced by Mnl1 under weak acid stress; rat catheter and Spider biofilm induced
orf19.4844	C1_09790C_A	C1_09790C_A	0.000724872	-	hydrolase activity	-	0.000628884	-2.1083	pho4-Pi down vs WT-Pi	2.32669	-1.43682	1.58566	ORF	Uncharacterized	AIR2	Ortholog(s) have RNA binding, polynucleotide adenylyltransferase activity, protein binding, bridging activity
orf19.4318	C5_02940C_A	MIG1	-0.0879271	-	structure-specific DNA binding	-	0.00943268	-2.10234	pho4-Pi down vs WT-Pi	2.3119	1.03951	1.05788	ORF	Verified	MIG1	C2H2 transcription factor; repressor; regulates genes for carbon source utilization; Tup1-dependent and independent functions; hyphal, Hap43 and caspofungin repressed; Spider and flow model biofilm induced
orf19.4890	C1_10210C_A	CLA4	0.388277	cellular response to stress	ion binding	mitochondrion	0.00410724	-2.08075	pho4-Pi down vs WT-Pi	2.18954	-1.18634	1.24837	ORF	Verified	CLA4	Ste20p family Ser/Thr kinase required for wild-type filamentous growth, organ colonization and virulence in mouse systemic infection; role in chlamydospore formation; functional homolog of S. cerevisiae Cla4p; mutant caspofungin sensitive
orf19.3419	C6_01670W_A	MAE1	0.676121	monocarboxylic acid metabolic process	oxidoreductase activity	mitochondrion	0.000660832	-2.05211	pho4-Pi down vs WT-Pi	2.10254	-1.66253	1.70339	ORF	Uncharacterized	MAE1	Malic enzyme, mitochondrial; transcription regulated by Mig1, Tup1; colony morphology-related gene regulation by Ssn6; Hap43-repressed; Spider biofilm repressed
orf19.7516	CR_00190W_A	CR_00190W_A	0.611396	carbohydrate metabolic process	hydrolase activity	-	0.000399865	-2.03922	pho4-Pi down vs WT-Pi	2.32402	-1.71569	1.95531	ORF	Uncharacterized		Putative glycoside hydrolase; Hap43-induced gene
orf19.1693	C3_01530C_A	CAS4	0.0531268	cellular response to stress	-	mitochondrion	0.000687466	-2.02452	pho4-Pi down vs WT-Pi	2.24136	1.03221	1.07256	ORF	Verified	TAO3	RAM cell wall integrity signaling network protein; cell separation, azole sensitivity; needed for hyphal growth; insertion mutation near 3' end of gene increases caspofungin sensitivity; pheromone/hyphal induced; flow biofilm repressed
orf19.4255	C5_02460C_A	ECM331	-0.937208	-	-	-	0.0107268	-2.0119	pho4-Pi down vs WT-Pi	7.34783	-1.7619	6.43478	ORF	Verified		GPI-anchored protein; mainly at plasma membrane, also at cell wall; Hap43, caspofungin-induced; Plc1-regulated; Hog1, Rim101-repressed; colony morphology-related regulated by Ssn6; induced by ketoconazole and hypoxia
orf19.5300	C4_04090C_A	C4_04090C_A	0.0667966	-	ion binding	-	0.00453198	-2.00711	pho4-Pi down vs WT-Pi	2.29539	-1.14929	1.31436	ORF	Uncharacterized	CNE1	Calnexin; integral membrane ER chaperone involved in folding and quality control of glycoproteins; caspofungin induced

## Sheet: 3-edgeR_Ca_CAF2vadh1_woPa_ca
genes	logFC	logCPM	F	PValue	FDR
ADH1	14.8961	9.78809	654.863	4.08913e-15	1.23471e-11
PGA31	-7.86426	3.12818	120.798	3.42695e-09	1.59195e-06
CAALFM_C102690CA	-6.99388	-0.233254	50.906	1.57937e-06	0.000110905
CAALFM_C300590WA	6.87322	-0.377554	8.68748	0.00989096	0.0381427
CAALFM_C105970WA	-6.74816	2.81276	72.5316	1.42952e-07	2.43784e-05
CAALFM_C402580WA	6.56512	0.383362	4.13213	0.0599655	0.138253
CAALFM_C702280WA	-6.49213	2.51442	49.2799	1.95065e-06	0.000124
CAALFM_CR04620CA	-6.38172	-0.195376	23.9818	0.000187395	0.00249268
HIS1	5.95937	4.14306	758.01	1.19849e-15	7.23768e-12
CAALFM_C401340WA	-5.86832	2.71859	32.3081	2.59145e-05	0.000711352
tK(CUU)1	5.59726	-0.280878	6.87561	0.0190993	0.06093
ACE2	-5.39285	7.2729	77.0855	9.29828e-08	2.1597e-05
ATO7	-5.33649	0.37094	18.3649	0.000635332	0.00582292
CAALFM_C301640CA	-5.21629	0.879242	83.9631	5.04625e-08	1.45116e-05
CAALFM_C700350CA	-5.12608	10.7362	64.955	1.40945e-07	2.43784e-05
CAALFM_CR08270WA	-5.03085	4.44399	129.183	5.81463e-10	4.38932e-07
NRG2	-5.02815	0.429615	17.8714	0.000555992	0.00527101
CAALFM_C306880WA	-5.02281	-0.130492	36.5688	1.25279e-05	0.000442434
LDG3	-5.01533	-0.426577	27.6986	6.14529e-05	0.00121649
MRV3	-4.99645	0.144202	43.9558	4.04896e-06	0.000207414
FGR41	-4.97725	2.66976	35.1482	1.58547e-05	0.000520361
MTLA2	-4.88999	1.5945	182.814	1.3889e-10	1.55803e-07
CAALFM_CR03320CA	4.75579	-1.45634	3.44036	0.0831641	0.174688
CAALFM_C110050WA	-4.64434	1.52901	71.8594	1.52607e-07	2.43784e-05
PGA12	-4.59448	-0.401923	31.1159	3.21315e-05	0.000822213
CAALFM_C702250WA	-4.58995	1.04411	54.4534	1.01384e-06	7.95141e-05
HGT12	-4.56747	3.68634	59.8882	5.35954e-07	5.38898e-05
CAALFM_C300990CA	-4.43057	2.64572	39.8927	7.39739e-06	0.000312398
HAP3	-4.3969	5.37999	132.794	1.66687e-09	8.38853e-07
CAALFM_C702210WA	-4.2811	-0.332648	43.1392	4.55491e-06	0.000221832
CAALFM_CR04990CA	-4.27963	0.00655721	51.1964	1.52174e-06	0.000108115
SSA2	-4.2207	9.99024	60.8002	2.30592e-07	3.16487e-05
LIP10	-4.1755	-0.711502	14.8596	0.00125054	0.00916651
CAALFM_C106620CA	-4.02112	-0.263534	30.5268	3.5807e-05	0.000882607
CAALFM_C208350CA	-3.99355	-0.625302	18.8349	0.000435866	0.00452267
CAALFM_CR07300WA	-3.9442	0.955151	60.534	4.98381e-07	5.10122e-05
PGA30	-3.90531	0.766821	34.5751	1.74676e-05	0.000540959
PGA38	-3.89747	3.93898	25.3703	9.85309e-05	0.00162576
GIG1	-3.87155	3.07819	55.1602	9.30634e-07	7.62247e-05
CAALFM_C602100WA	-3.84833	5.56731	139.199	1.16133e-09	7.01324e-07
CAALFM_C204000CA	-3.80731	1.01592	30.6705	3.48692e-05	0.000870146
SCW11	-3.73913	3.05024	40.225	7.03012e-06	0.000301099
CAALFM_CR06650CA	-3.72331	3.54717	24.3957	0.000121038	0.00186409
OPT5	-3.71824	1.99841	66.0371	2.74744e-07	3.45663e-05
CSA2	-3.70022	1.79755	5.30553	0.0340223	0.0908314
ARG4	-3.63317	7.99929	180.316	1.54797e-10	1.55803e-07
PBR1	-3.62577	1.74524	63.3802	3.64377e-07	4.31466e-05
GST1	-3.61744	5.44534	21.1168	0.000251563	0.00303594
CAALFM_C111710CA	-3.59722	1.04334	32.8566	2.35157e-05	0.000666719
CAALFM_CR09060WA	-3.53689	-0.731808	30.6816	3.47976e-05	0.000870146
STE2	-3.53631	2.58786	136.031	1.38598e-09	7.60903e-07
CAALFM_C500510WA	-3.50905	1.50348	41.8282	5.52192e-06	0.000258503
CAALFM_C402460WA	-3.47214	0.683086	43.3596	4.41176e-06	0.000216607
RBR1	-3.45108	0.648579	21.7561	0.000217012	0.00274627
HSP104	-3.44664	11.1901	26.0041	6.20493e-05	0.00121649
ADH4	-3.44208	0.483258	52.6772	1.26216e-06	9.29533e-05
HWP1	-3.4339	0.789776	21.8798	0.00021096	0.00268812
HWP2	-3.40107	1.12697	48.3997	1.19011e-06	8.98387e-05
CAG1	-3.39287	3.91234	104.224	1.03698e-08	4.27613e-06
CSE4	-3.38237	2.54964	79.5554	7.42824e-08	2.03905e-05
WOR1	-3.3812	3.87447	56.4821	7.94702e-07	7.05765e-05
CAALFM_C700770WA	-3.38005	9.22839	29.9048	2.73754e-05	0.000734756
CEK2	-3.3184	4.85716	61.7209	2.06303e-07	2.96634e-05
CAALFM_C106220CA	-3.27691	1.28967	42.4884	5.00899e-06	0.000241994
CHA1	-3.25731	5.4057	28.1074	5.67151e-05	0.00117699
CAALFM_C505180WA	-3.24596	2.99852	77.5153	8.93821e-08	2.1597e-05
FGR23	-3.23589	5.44426	184.523	1.29062e-10	1.55803e-07
CAALFM_CR02340WA	-3.23072	0.495037	39.4692	7.89686e-06	0.000326638
CAALFM_C403340CA	-3.21624	7.07823	16.1913	0.000714779	0.00631998
CAALFM_C305660CA	-3.20821	-0.236501	29.9458	3.98979e-05	0.000932413
MRV5	-3.19302	1.27968	42.2878	5.15897e-06	0.000245873
HST6	-3.18982	2.37897	66.3652	2.65501e-07	3.4114e-05
CSA1	-3.16642	8.60758	70.2033	7.83152e-08	2.05628e-05
CHT3	-3.12516	3.47995	11.6783	0.00324434	0.0174778
CAALFM_C303570CA	-3.12214	3.80307	26.0531	8.55561e-05	0.00148044
CAALFM_CR04770CA	-3.10471	1.85121	24.4898	0.000118631	0.00183696
CAALFM_C110850WA	-3.10109	-0.0238035	14.0254	0.00158877	0.0106264
FAR1	-3.09701	4.30976	184.902	1.26986e-10	1.55803e-07
CAALFM_C206450CA	-3.06555	4.51075	13.1975	0.00202926	0.0125048
CAALFM_CR06990WA	-3.06526	-0.805466	17.9396	0.00054637	0.00520119
CAALFM_CR06500CA	-3.02891	3.76726	36.0573	1.36263e-05	0.000475661
CAALFM_C104270CA	-3.02321	-0.380125	22.8554	0.000169334	0.00234543
PGA37	-3.01584	3.87175	35.6942	1.44714e-05	0.000482831
CAALFM_C204610CA	-3.01562	-0.549205	20.1771	0.000314092	0.00359924
CCE1	-3.01281	1.09182	16.5666	0.000782263	0.00670083
CAALFM_C407000WA	-3.01255	1.77627	23.3074	0.000153231	0.00218246
MDR1	-3.00748	7.63702	33.3087	1.41438e-05	0.000479211
RPS27A	-2.99894	1.94248	16.8314	0.000729071	0.00639951
FRP2	-2.99628	7.75856	65.9785	1.25324e-07	2.43784e-05
CAALFM_C208320CA	-2.98942	1.66848	27.1457	6.85817e-05	0.00130569
RAS2	-2.9798	6.49828	102.718	1.15536e-08	4.36075e-06
CAALFM_C210320CA	-2.97486	0.386422	40.0126	7.26243e-06	0.000308858
CAALFM_CR00650WA	-2.96173	-0.420683	16.6975	0.000755435	0.00653592
CAALFM_C304450CA	-2.96084	1.28901	19.2326	0.000395006	0.00428604
RBE1	-2.94793	0.675808	24.274	0.000124233	0.00188503
CAALFM_C301100WA	-2.93425	0.220838	27.6338	6.22447e-05	0.00121649
CAALFM_C206530WA	-2.928	4.41355	48.1517	2.26548e-06	0.000139588
PRN3	-2.91894	5.82658	48.3094	2.21824e-06	0.000139541
CAALFM_C400990WA	-2.91243	0.275385	27.8853	4.14473e-05	0.000948106
GIT4	-2.91099	0.0709901	42.1124	5.29425e-06	0.000249781
CAALFM_C210020CA	-2.90799	0.609409	15.0896	0.00117207	0.00871693
CAALFM_C403870CA	-2.89244	0.340612	34.8809	1.65852e-05	0.000525046
CFL2	-2.87437	7.01798	35.5222	9.42454e-06	0.000369695
CAALFM_C109700WA	-2.84755	0.258016	15.0481	0.00118581	0.00879743
CAALFM_C406910WA	-2.84028	7.57302	22.6684	0.000132824	0.00198545
MRV4	-2.83538	2.23685	24.5447	0.000117251	0.00182025
CAALFM_C701390WA	-2.83457	2.98667	22.7891	0.000171851	0.00236943
PMS1	-2.81705	2.25139	59.4457	5.63523e-07	5.4889e-05
CAALFM_C306670CA	-2.78912	2.46365	39.683	7.64018e-06	0.0003182
SPO22	-2.78631	1.90607	54.6531	9.89518e-07	7.86276e-05
CAALFM_C403760WA	-2.76921	-0.232863	30.2677	3.75705e-05	0.000907552
CAALFM_C104690CA	-2.76902	1.18321	63.4188	3.62861e-07	4.31466e-05
CAALFM_CR05190WA	-2.75663	0.0123753	25.7054	9.19073e-05	0.00156346
CAALFM_CR02630CA	-2.74959	-0.19306	27.9097	5.89531e-05	0.00120276
CAALFM_C107040CA	-2.74939	-0.653031	15.2475	0.00112142	0.00846892
CAALFM_C701700WA	-2.71283	8.3113	53.313	1.16621e-06	8.91488e-05
FRE9	-2.69565	8.09579	45.8791	1.72498e-06	0.000115746
CAALFM_CR06920WA	-2.69335	-0.51373	18.4074	0.000485149	0.00478717
CAALFM_C103890WA	-2.6822	-0.524384	35.4532	1.50645e-05	0.000497129
CAALFM_CR02900WA	-2.68181	-0.103544	21.2401	0.000244446	0.00299434
CAALFM_C305640WA	-2.67639	0.336147	31.9196	2.77788e-05	0.000740691
CAALFM_C207710WA	-2.67027	-0.338578	16.3202	0.000835712	0.00700647
RBT5	-2.66243	8.88019	15.0454	0.00099676	0.00787881
CAALFM_C103470CA	-2.65046	0.7777	38.3676	9.38222e-06	0.000369695
CAALFM_C701010WA	-2.61633	1.461	70.2127	1.79487e-07	2.77929e-05
DAL52	2.59709	1.28325	31.7375	1.9075e-05	0.000581786
CAALFM_C703580CA	-2.59548	5.58838	131.207	5.10204e-10	4.38932e-07
CAALFM_C302330CA	-2.59064	0.821827	38.133	5.9644e-06	0.00026984
KRE62	-2.58934	0.345683	18.499	0.000474092	0.00475486
SOD5	-2.58559	3.17722	71.8063	1.53399e-07	2.43784e-05
CAALFM_C205060CA	-2.57517	8.48408	24.1762	0.000126866	0.00192016
STE18	-2.55294	0.855765	49.7682	1.8298e-06	0.000118675
CAALFM_C301540WA	-2.54856	1.74223	21.7384	0.000217894	0.0027471
CAALFM_C704080CA	-2.54553	0.635477	9.05592	0.00783144	0.0321728
CTF8	-2.54	0.0283758	25.3269	9.94283e-05	0.0016361
LYS5	-2.53915	-0.2655	18.4519	0.000479738	0.00477268
CAALFM_C306390WA	2.51998	1.68917	6.57508	0.0188947	0.0605655
CAALFM_C110060CA	-2.51186	5.67268	29.7448	4.14327e-05	0.000948106
CAALFM_CR07740WA	-2.50056	5.25249	18.485	0.000475763	0.00475587
CAALFM_C304870WA	-2.48738	1.09893	25.5409	9.50938e-05	0.00160411
CAALFM_CR03480WA	-2.47774	5.42408	24.9532	7.83452e-05	0.00140812
PGA39	-2.4773	0.861299	40.5866	6.65343e-06	0.00029116
CAALFM_C501990WA	-2.457	0.34766	18.4727	0.000477241	0.00475587
CAALFM_C602550WA	-2.45655	-0.778938	15.6007	0.00101676	0.00796395
CAALFM_C307130WA	-2.45473	2.21037	26.1527	8.38281e-05	0.001461
CAALFM_C702190WA	-2.44749	-0.0447627	7.72309	0.0127745	0.046057
CAALFM_C302750WA	-2.44457	3.37466	23.3283	0.000152529	0.00218246
CRH11	-2.44005	5.15309	38.9483	8.56367e-06	0.000349432
CDC6	-2.43222	1.5287	55.0578	9.42199e-07	7.62247e-05
ECE1	-2.41881	2.20947	11.28	0.00368624	0.0191907
CFL11	-2.41579	0.225584	21.8809	0.000210909	0.00268812
CAALFM_C304730CA	-2.40675	2.13232	28.8739	4.88924e-05	0.0010545
PGA13	-2.40552	4.74878	23.517	0.000108796	0.00174275
FET99	-2.38252	1.5762	37.1036	1.1484e-05	0.000415282
CAALFM_C500530WA	-2.37963	0.554962	35.7729	1.42835e-05	0.000479211
CAALFM_C209180WA	-2.37951	1.87885	55.7384	8.68217e-07	7.28217e-05
PGA48	-2.36272	3.9181	49.6956	1.84724e-06	0.000118675
KIP2	-2.34961	1.93555	29.2892	4.5163e-05	0.000994401
CAALFM_CR06190CA	-2.34186	-0.635126	3.75399	0.0693109	0.152539
CAALFM_CR07540CA	-2.34016	2.58238	23.1959	0.000157036	0.00221575
AHA1	-2.33339	5.51302	31.1653	3.1843e-05	0.000818296
CAALFM_C504380CA	-2.33271	3.15356	45.9053	3.07638e-06	0.000168893
CAALFM_C206980WA	-2.32195	-0.0258433	20.3424	0.000301936	0.00348608
CAALFM_C401640CA	-2.30974	-0.149121	5.78189	0.0277451	0.078259
CAALFM_C703550CA	-2.30952	2.19002	28.8844	4.87939e-05	0.0010545
CAALFM_C111990WA	-2.29936	1.00406	37.0019	1.16749e-05	0.000419672
FGR2	-2.27422	0.330686	9.97413	0.00568742	0.0259218
CAALFM_C400530CA	-2.27378	2.00417	7.16259	0.0158486	0.0534691
CAALFM_C208580WA	-2.26804	0.98055	24.6385	0.000114938	0.00181119
FGR12	-2.26789	-0.823673	7.51429	0.013833	0.0485044
CAALFM_C207620WA	-2.26483	1.00517	32.7081	2.41396e-05	0.000670562
CAALFM_CR08310CA	-2.25766	2.14882	45.6991	3.16577e-06	0.000170555
GCV1	-2.24288	4.89659	69.8732	1.85664e-07	2.80306e-05
FTR1	-2.23635	6.50325	22.9845	0.000123245	0.00187949
CAALFM_C107480CA	-2.23438	0.764502	21.8792	0.00021099	0.00268812
BMT9	-2.23007	4.16967	73.0315	1.36215e-07	2.43784e-05
CAALFM_C102700CA	-2.21086	6.57706	11.3295	0.00321452	0.0174018
AAP1	-2.20904	7.41532	25.7358	6.58192e-05	0.00126587
CAALFM_C105160CA	-2.18773	9.28995	19.2663	0.000309463	0.00355294
GCV2	-2.18753	7.91248	34.5666	1.1206e-05	0.000409129
HAK1	-2.18029	2.65617	12.8618	0.00224578	0.0134716
CSK1	-2.17132	-0.698375	8.54743	0.0094041	0.0367581
OFI1	-2.16953	1.09941	9.80134	0.00603431	0.0269336
TNA1	2.16859	4.62086	91.2609	2.75802e-08	9.25317e-06
CAALFM_C200750WA	-2.15909	5.09385	22.6344	0.000177886	0.00240865
PIR32	-2.14303	-0.63183	26.9983	7.06346e-05	0.00133301
PHO8	-2.13954	2.01942	8.3013	0.0102915	0.0393606
PGA22	-2.13661	-0.430227	6.75873	0.0185865	0.0598316
CAALFM_C112910WA	-2.13626	3.85863	12.0083	0.00292308	0.0162396
CAALFM_C400640WA	-2.10315	-0.432657	11.7042	0.00321772	0.0174018
HMX1	-2.10119	9.25756	27.2599	4.73073e-05	0.00102766
CAALFM_C401630CA	-2.10074	0.595007	5.12272	0.0368528	0.0963855
NGT1	-2.09366	3.09586	12.2793	0.00268588	0.0153454
ITS2	-2.09177	2.66252	11.2727	0.003695	0.0192032
CRG1	-2.08809	4.60508	33.4605	2.11578e-05	0.000614287
TOS4	-2.08405	5.33044	51.1166	8.10217e-07	7.09116e-05
CAALFM_C210000CA	-2.08395	3.04505	11.2567	0.00371413	0.0192529
CAALFM_C204670WA	2.07625	1.22694	16.2714	0.00069866	0.00621386
POX18	-2.0743	2.74009	11.5203	0.0034121	0.018012
MNN22	-2.0718	5.75324	37.2331	1.12461e-05	0.000409129
PRN1	-2.06544	6.71468	45.554	1.81149e-06	0.000118675
ABP2	-2.0584	1.29532	14.5193	0.00137766	0.00967603
CAALFM_C302290WA	-2.05733	3.66455	76.3982	9.90837e-08	2.21617e-05
HSP21	-2.05187	9.40061	16.6015	0.000636385	0.00582292
SIS1	-2.0479	7.15898	27.104	6.91558e-05	0.00130919
ROA1	-2.03794	10.6815	28.3082	3.79413e-05	0.000909236
CAALFM_C303460CA	-2.03545	7.90522	28.8785	3.37222e-05	0.000855666
SMC3	-2.03068	3.2338	72.4455	1.4415e-07	2.43784e-05
LIP2	-2.03047	1.07213	10.9636	0.00408579	0.0207064
SSU1	-2.02994	8.3065	12.0387	0.00253973	0.0147088
CAALFM_C700190WA	-2.02954	3.75464	63.115	3.74988e-07	4.35491e-05
CTF5	-2.02756	-0.297991	15.3002	0.00110507	0.00838384
CAALFM_C500620WA	-2.01695	0.386357	15.7334	0.000980286	0.00780995
CAALFM_C305080WA	-2.01471	2.21609	34.9515	1.63888e-05	0.000523662
EAF3	-2.01447	4.05613	67.47	2.36833e-07	3.1783e-05
CAALFM_C404400CA	-2.01284	1.84971	16.882	0.000719372	0.00634203
CAALFM_C602760WA	-2.00803	0.0676339	20.478	0.000292354	0.00340835
CAALFM_C306630WA	-2.00658	2.6198	37.7513	1.03479e-05	0.000385746
ZRT1	2.00524	4.88671	11.0997	0.00390821	0.0201208
CAALFM_CR03270WA	-2.0052	3.63344	20.7951	0.000271249	0.00320489
CAALFM_C502800CA	-2.00001	1.37403	13.3055	0.00196471	0.0123001
CAALFM_CR09940WA	-1.99242	1.53881	43.2637	2.57606e-06	0.00014816
MRV6	-1.98577	0.223186	13.3469	0.00194051	0.0122411
CAALFM_C108150CA	-1.98006	-0.403595	16.5846	0.000639414	0.00584179
RAD51	-1.97555	4.93829	69.0541	2.0157e-07	2.96634e-05
CAALFM_C202220CA	-1.95929	3.21241	28.5817	5.17227e-05	0.00109214
CAALFM_C305330CA	-1.95891	0.553216	18.1336	0.000519986	0.0050182
AAH1	-1.95793	3.44895	27.7093	6.13242e-05	0.00121649
CAALFM_C601130WA	-1.95717	-0.221905	14.0139	0.00159408	0.0106372
CAALFM_C202550CA	-1.94889	5.03499	17.7686	0.000570867	0.00536989
CAALFM_C109780CA	-1.94688	8.69984	23.9585	9.82286e-05	0.00162521
CAALFM_C100820WA	-1.94624	1.44453	17.1443	0.000671348	0.0060602
CAALFM_C402240CA	-1.94018	-0.455076	12.0762	0.00286156	0.0160157
CAALFM_C106970CA	-1.93557	7.94764	43.309	2.55786e-06	0.00014816
FGR46	-1.93099	1.74105	14.7781	0.00107906	0.00828009
DIE2	-1.93046	0.661923	43.4219	4.37218e-06	0.000216423
GIT1	-1.92657	1.26177	19.1488	0.000403246	0.00433311
CAALFM_C201910WA	-1.92625	2.01455	52.9819	1.21512e-06	9.0594e-05
YOX1	-1.92551	-0.127737	7.32245	0.0148937	0.0510774
CAALFM_C206760CA	-1.9234	0.278075	22.3189	0.000190952	0.00252886
EBP1	-1.92142	6.24606	30.3469	3.7021e-05	0.000903146
STE4	-1.91324	4.93577	51.2753	1.50651e-06	0.000108115
CAALFM_C104490WA	-1.91021	6.20389	40.8277	3.80245e-06	0.000197957
INO1	1.90873	10.6289	9.56182	0.00595343	0.0267108
CAALFM_C404110WA	-1.90552	0.322424	15.1203	0.00116204	0.00865295
CAALFM_C102380CA	-1.90203	1.06464	17.9574	0.000543887	0.00519705
CAALFM_C206280CA	-1.89442	0.516287	17.0658	0.000685331	0.00614053
PLB1	-1.8927	0.568419	22.6126	0.000178758	0.00240964
CAALFM_C208200WA	-1.89178	8.43302	10.7251	0.00441934	0.0218578
PSO2	-1.8864	3.97291	140.924	1.05633e-09	7.01324e-07
CAALFM_C400250WA	1.88527	3.32878	2.58863	0.125866	0.236793
MFA1	-1.8849	1.35873	1.09649	0.309558	0.454888
ARC18	-1.88251	1.47509	8.96505	0.00808922	0.0329519
CAALFM_C208340CA	-1.88148	1.80372	17.6419	0.00058981	0.00550489
PGA7	-1.87982	6.8212	22.2008	0.000196117	0.00256155
SBA1	-1.87869	2.48869	17.2295	0.000656534	0.00593535
BTA1	-1.87668	2.62319	11.259	0.00371135	0.0192529
CAALFM_C207280WA	-1.87313	3.43196	12.796	0.00229117	0.0136588
CAALFM_C202050CA	-1.8689	3.04111	15.5537	0.00103003	0.00803666
TRX1	-1.86693	8.61731	8.52175	0.00874311	0.0347595
CAALFM_C504390CA	-1.86428	-0.349361	14.212	0.00150501	0.0102467
CAALFM_C601520WA	-1.86091	5.68025	9.15714	0.00755517	0.0312569
INN1	-1.86018	7.87091	37.2825	6.90641e-06	0.000300056
CAALFM_CR03260WA	-1.86005	8.1918	35.618	1.4656e-05	0.000486306
IFA14	-1.85729	4.89212	31.3212	2.06816e-05	0.000606292
FRP1	-1.85609	7.83555	45.7223	1.7661e-06	0.000117203
PRI2	-1.8552	0.639437	14.2644	0.0014824	0.0101614
COI1	-1.8532	5.52615	13.4591	0.00187678	0.011943
CAALFM_C207840WA	-1.84916	0.749017	10.206	0.00525663	0.0244756
CAALFM_C112480WA	-1.84328	0.368389	13.393	0.00191405	0.0121418
NRM1	-1.84023	1.52436	24.7894	0.000111318	0.00177375
CAALFM_C301440CA	-1.83762	0.882563	16.9961	0.00069803	0.00621386
CAALFM_CR07460CA	-1.83307	3.59223	62.5213	4.00014e-07	4.5579e-05
ZRT2	1.83276	7.16902	17.9667	0.000436777	0.00452359
CAALFM_C202390WA	-1.82037	5.8562	18.1815	0.000412234	0.00437057
CAALFM_C504460CA	-1.81971	-0.540433	8.14237	0.0109147	0.0410168
CAALFM_CR09070CA	-1.81322	3.8142	26.0039	6.20528e-05	0.00121649
CAALFM_CR04610CA	-1.81193	2.75337	15.9726	0.000918225	0.00742324
CAALFM_CR09050CA	-1.80986	2.25277	33.6532	2.04618e-05	0.000604511
CAALFM_C300010CA	-1.80924	-0.500735	9.87272	0.0058882	0.0265167
CAALFM_CR01510CA	1.80666	0.864004	7.99502	0.0106949	0.0403916
SAM50	-1.80663	2.30614	35.0796	1.60386e-05	0.000523553
BET4	-1.8065	1.2827	16.5925	0.000776883	0.00667368
PTP2	-1.80536	9.0421	19.4157	0.000297691	0.00345058
TPK1	-1.80454	7.374	21.6945	0.000167909	0.00233104
SMC2	-1.80098	3.75142	59.0854	5.87148e-07	5.54029e-05
CAALFM_C101620CA	-1.79369	6.18019	24.6495	0.000114668	0.00181119
CAALFM_C111910WA	-1.79265	0.797154	23.6569	0.00014195	0.00208067
CAALFM_C208150WA	-1.78916	-0.147087	12.2245	0.00273209	0.0155213
CFL4	-1.78188	3.44485	8.83605	0.00847179	0.0339962
CAALFM_CR08420WA	-1.77801	7.32672	24.6393	0.000114916	0.00181119
CAALFM_C703410CA	-1.77607	2.40768	15.3303	0.000916597	0.00742001
CAALFM_C112690CA	-1.77172	-0.108552	15.7526	0.000975139	0.00779982
CAALFM_C305840WA	-1.76747	1.19355	17.2774	0.000648374	0.00589333
CAALFM_C111800CA	-1.75427	0.0595078	7.71795	0.0127995	0.0460768
CAALFM_C406220CA	-1.75116	-0.39472	15.0122	0.00119784	0.00886491
CAALFM_C205400WA	-1.75058	1.51714	25.167	0.000102809	0.00166899
CAALFM_C205290CA	-1.74708	3.26962	14.0357	0.00158401	0.0106264
CAALFM_C402520CA	-1.74373	7.28816	14.5525	0.00115442	0.00862919
CAALFM_C201320WA	-1.7433	3.65448	8.81187	0.00854576	0.0342
DCC1	-1.73901	2.50413	74.5245	1.18111e-07	2.43784e-05
UME6	-1.72959	2.14821	28.7283	5.02804e-05	0.00107675
CAALFM_C700760CA	-1.7238	3.53423	3.94304	0.0632738	0.143105
CAALFM_C702360WA	-1.72324	-0.385825	8.83348	0.00847962	0.0339962
CAALFM_C104280CA	-1.72297	1.15823	20.9034	0.000264431	0.0031497
CAALFM_C107530WA	-1.72174	3.60875	9.33781	0.00708893	0.029979
CAALFM_C203890WA	-1.72113	0.876258	14.8687	0.00124732	0.00916651
CAALFM_C305400CA	-1.7211	1.64376	10.4881	0.0047814	0.022953
CAALFM_CR05210WA	-1.72071	0.09975	7.59727	0.0134008	0.0474093
CAALFM_C400730CA	-1.71913	-0.425855	6.37607	0.021687	0.0660788
CAALFM_CR07120CA	-1.71749	2.64312	57.2291	7.27786e-07	6.65924e-05
CAALFM_CR09040WA	-1.71283	5.29736	54.0446	5.44341e-07	5.38898e-05
SEO1	-1.71092	3.44404	21.1444	0.000249949	0.00303594
CAALFM_C206930CA	-1.70968	1.49514	18.3404	0.000493433	0.00484527
TOS1	-1.70956	6.30269	73.5876	1.29132e-07	2.43784e-05
CAALFM_C306550CA	-1.70833	3.21324	31.3938	3.05459e-05	0.000791702
QDR2	-1.70634	5.94483	38.974	5.17071e-06	0.000245873
ERD1	-1.70148	2.14398	26.7696	7.3958e-05	0.00136549
CAALFM_C307240WA	-1.69892	0.922601	17.1335	0.000673259	0.00606837
CAALFM_CR07500WA	-1.69448	0.384626	9.67719	0.0062983	0.0276621
CAALFM_C504980WA	-1.69262	7.96	13.7422	0.0014774	0.0101387
CAALFM_C209850CA	-1.6913	1.08135	20.9373	0.000262341	0.00313099
CAALFM_CR03470WA	-1.69104	3.70076	50.3498	1.69666e-06	0.000115125
CAALFM_C701690WA	-1.68331	3.21394	19.7131	0.000351254	0.0038993
CAALFM_C207180WA	-1.67975	-0.136115	6.24738	0.022859	0.0685431
CAALFM_C400850CA	-1.67941	2.28275	29.0949	4.68669e-05	0.00102177
CAALFM_C603090WA	-1.67303	-0.459439	13.7551	0.00171953	0.0111969
CDC21	-1.66524	2.98012	46.4767	2.84306e-06	0.000159533
IME2	-1.65325	3.37461	8.61927	0.00916165	0.0360438
CAALFM_C406150CA	-1.65203	0.384261	9.41801	0.00689246	0.029333
CAALFM_C202420CA	1.64812	5.0752	103.889	1.06213e-08	4.27613e-06
CAALFM_C305900WA	-1.64606	5.4646	22.4562	0.000139712	0.00205285
CAALFM_C106160WA	-1.64535	0.908389	19.1064	0.000407489	0.00435545
CAALFM_C206770WA	-1.64467	1.21832	19.0567	0.000412523	0.00437057
CAALFM_C112470WA	-1.64402	2.84011	10.9604	0.00409009	0.0207064
CAALFM_C302660WA	-1.64163	2.58064	6.56264	0.0201073	0.0629488
CAALFM_C500140CA	1.63418	2.27875	26.1973	8.30678e-05	0.00145405
OGG1	-1.63126	3.46948	62.1004	4.18886e-07	4.59937e-05
CAALFM_C306560WA	-1.63111	8.60511	36.737	7.59654e-06	0.0003182
HGT10	-1.63025	3.14372	12.8227	0.00197122	0.0123125
GFA1	-1.62876	8.03781	64.7473	1.44371e-07	2.43784e-05
PSF1	-1.62864	1.5293	23.8774	0.000135315	0.00199796
HGT9	1.62722	3.122	21.5966	0.000225106	0.00280373
CAALFM_C111080WA	-1.62414	8.32064	19.8091	0.000268983	0.00318507
CAALFM_C301070CA	-1.62156	2.74605	18.5575	0.000467174	0.00470995
CAALFM_CR08380CA	-1.61931	-0.00395266	12.8891	0.00222725	0.013437
DLD1	1.61925	6.42232	13.2719	0.00198453	0.0123298
MIF2	-1.61635	7.31539	26.3627	5.73787e-05	0.00118263
CAALFM_C302720WA	-1.61482	4.86259	77.154	9.23979e-08	2.1597e-05
CAALFM_C106430CA	-1.6135	2.69263	21.0817	0.00025363	0.00305113
CAALFM_C113290WA	-1.61331	0.0853919	12.5465	0.00247299	0.0144261
CAALFM_C106870CA	-1.61064	3.2116	9.62448	0.00641428	0.0279524
CAALFM_C204430WA	-1.61019	-0.526993	8.2837	0.0103585	0.0395417
CAALFM_CR07110CA	-1.60722	2.7206	43.9597	2.31145e-06	0.000139588
CAALFM_C306970WA	-1.59612	4.41156	21.6702	0.000221334	0.0027731
CAALFM_C306540CA	-1.5923	1.39957	10.4041	0.00491769	0.0234211
HXT5	1.59104	4.46494	18.425	0.000483009	0.00478179
CAALFM_C602420WA	-1.58668	6.06551	13.2492	0.00172246	0.0111969
CAALFM_C107980CA	-1.58581	5.75361	46.9125	2.67837e-06	0.000152591
MCM2	-1.57777	5.37316	86.4311	4.09407e-08	1.2362e-05
CAALFM_C301310WA	-1.57295	5.22401	41.4388	3.44336e-06	0.000182408
YBL053	-1.5712	4.63196	41.7221	5.6097e-06	0.000260592
CDC54	-1.56833	4.94353	78.1643	3.42304e-08	1.08799e-05
CAALFM_C703780CA	-1.5638	4.99451	7.81085	0.0123573	0.0449824
CDC46	-1.56345	4.83	43.5617	2.45884e-06	0.000145578
ATO5	-1.56232	1.77532	21.3124	0.00024038	0.00296862
SOL1	-1.5622	4.50551	57.6646	3.40265e-07	4.19359e-05
CAALFM_C107610CA	-1.56209	0.618048	15.7179	0.000984478	0.00782826
CAALFM_C402720CA	-1.55501	8.27495	14.0643	0.00133832	0.00951958
CAALFM_C303370CA	-1.54931	7.5533	20.1161	0.000318712	0.00363651
OSM2	1.54837	9.12626	8.97431	0.00738104	0.0308498
MET8	-1.54772	3.21614	25.6588	9.27977e-05	0.00156976
FGR51	-1.54688	4.67206	61.7627	4.34747e-07	4.64825e-05
PHO114	-1.5448	3.38089	33.7971	1.99588e-05	0.000596098
CAALFM_C204740CA	-1.54363	1.14694	9.32467	0.00712175	0.0300757
CAALFM_C502680WA	-1.54227	5.63549	29.9944	3.95369e-05	0.000932413
YIM1	-1.54134	8.1721	13.4016	0.00164219	0.01091
HGT17	1.53914	4.43165	3.93776	0.0634338	0.143293
FAA2-3	1.5329	7.66662	22.6037	0.000134884	0.00199649
CAALFM_C600810CA	-1.53287	4.53969	11.6631	0.00326013	0.0175315
CAALFM_C210070WA	-1.53102	1.02337	23.059	0.000161856	0.00226786
CAALFM_C107860WA	-1.5267	0.63623	27.6405	6.21619e-05	0.00121649
CAALFM_CR04220CA	1.52444	3.64321	16.868	0.000722038	0.00635045
CAALFM_C106390WA	-1.52377	2.67126	6.8994	0.017576	0.0577799
SCP1	-1.52235	1.84175	10.0669	0.0055104	0.0253059
CAALFM_C112280CA	-1.52221	1.51323	9.62238	0.00641896	0.0279524
CAALFM_C106630WA	-1.5217	3.15815	30.3332	3.71153e-05	0.000903146
IPL1	-1.52157	3.50812	19.7957	0.000344288	0.00384317
MCD1	-1.51995	1.11839	15.3533	0.00108885	0.00831295
TRR1	-1.51844	10.9714	11.275	0.0032741	0.017591
NAT4	-1.51746	2.29227	24.0538	0.000130253	0.00195186
CAALFM_C500600CA	-1.5165	0.733554	18.4753	0.000476926	0.00475587
PGA34	-1.51565	-0.645939	6.60425	0.0186674	0.0599641
CAALFM_C306700CA	-1.51478	9.32083	16.1147	0.000730564	0.0064033
CPA1	-1.51439	6.05049	18.7033	0.000358728	0.00395321
HSP90	-1.51419	10.195	9.57513	0.00592487	0.0266421
CAALFM_C601940WA	-1.51241	3.61969	17.8188	0.000563555	0.00531767
CAALFM_C303440CA	-1.51192	6.85795	19.9791	0.000329382	0.00372922
CAALFM_CR01220WA	-1.51173	1.26148	10.5432	0.00469433	0.0227338
SNZ1	-1.5086	4.90383	15.8015	0.000962149	0.00772662
PEX17	-1.50843	2.46407	12.6404	0.00240271	0.0141423
MNN11	-1.50693	3.75022	12.3854	0.00226851	0.0135596
PRA1	1.50625	6.02366	10.6254	0.00456775	0.0223902
CAALFM_CR10320WA	1.50619	2.64326	4.99643	0.0389664	0.100477
ESC4	-1.50471	0.818235	18.1634	0.000516062	0.00501045
CAALFM_C106120CA	-1.50457	0.874272	22.7087	0.000174957	0.00240128
CAALFM_CR03730CA	-1.50372	7.04522	28.0764	3.98204e-05	0.000932413
SUT1	1.5022	6.94412	18.5903	0.000369626	0.00405824
IRR1	-1.49999	4.08566	95.3921	1.9947e-08	7.08588e-06
SWE1	-1.49967	5.19314	32.7907	2.37904e-05	0.000668232
CAALFM_C701260WA	-1.49913	-0.603832	5.68651	0.0288877	0.0804971
CAALFM_C111270WA	-1.49699	9.5783	13.0399	0.0018399	0.0117703
PPT1	-1.49474	5.15367	29.9564	3.9819e-05	0.000932413
tH(GUG)1	-1.49375	0.502928	7.62027	0.0123809	0.0450395
CAALFM_C303860WA	-1.48925	2.70937	14.711	0.00130435	0.00937571
CAALFM_C603810WA	-1.48744	5.78821	19.3104	0.000305938	0.00351916
DPP3	-1.48717	5.13015	13.7343	0.0017301	0.0112345
CAALFM_C106190CA	1.48694	4.50078	2.62276	0.121677	0.230854
POL1	-1.48668	5.08929	20.1317	0.000317523	0.00363167
CAALFM_C601380CA	-1.48477	2.38702	12.1243	0.00281882	0.0158647
CAALFM_C304440CA	-1.48402	0.291006	13.1542	0.00205583	0.0126171
KIP3	-1.48014	4.54323	43.9492	4.0528e-06	0.000207414
CAALFM_C113000WA	-1.47732	0.181235	7.88557	0.0120142	0.0441594
CAALFM_C201260WA	-1.47685	2.80713	47.2158	2.57006e-06	0.00014816
MNN14	-1.47576	7.03542	20.9055	0.000203916	0.0026257
CAALFM_C306680CA	-1.47511	3.34917	16.5717	0.000641743	0.00585421
MET14	1.47427	3.39642	11.082	0.00393093	0.0201643
tR(CCU)1	-1.47337	0.216344	11.2852	0.00368002	0.0191748
CAALFM_C102670CA	-1.47209	1.97441	21.8471	0.000212544	0.00269654
DBF2	-1.47084	4.45339	25.4812	9.62809e-05	0.00161379
CAALFM_C503510CA	1.46906	6.1647	51.8537	1.3998e-06	0.000101848
FCY24	-1.46897	3.55544	46.3043	2.91129e-06	0.000161296
RBT1	-1.46675	1.58457	16.3429	0.000830639	0.00698639
NOP1	1.46526	5.86211	24.3852	0.000121309	0.00186409
SPR3	-1.46346	-0.400437	7.2449	0.0153485	0.0521315
POL30	-1.46258	3.35835	47.7985	2.37543e-06	0.000142032
CCN1	-1.46258	2.88451	29.2965	4.51003e-05	0.000994401
CAALFM_C401800WA	-1.45992	2.55609	5.7145	0.028547	0.0799537
ILV5	1.45773	7.31165	40.2426	4.18535e-06	0.000209069
CAALFM_C405890WA	-1.45611	1.79423	14.2514	0.00148796	0.010188
CAALFM_C701360CA	-1.45397	1.122	10.4283	0.00487799	0.0232759
MNN13	-1.45166	4.93179	19.0719	0.000410975	0.0043695
CAALFM_CR02600WA	-1.45155	0.00623846	18.7789	0.00044199	0.00453942
CAALFM_C402820WA	-1.45031	0.557631	13.0605	0.00211467	0.0128968
CAALFM_C107490CA	-1.44938	2.41303	30.734	3.44635e-05	0.000867188
CAALFM_C101710WA	-1.44834	7.42195	30.3351	2.51175e-05	0.000692624
CAALFM_C401310WA	-1.44643	1.64788	50.4236	1.68055e-06	0.000115125
CAALFM_C108960WA	-1.44534	3.68554	4.00731	0.0613627	0.140314
CAALFM_C307330WA	-1.44494	2.98292	17.0785	0.000683045	0.00612913
MLH1	-1.44469	3.13498	57.6955	6.89208e-07	6.40328e-05
CAALFM_C112840WA	-1.44468	2.04183	27.9382	5.86243e-05	0.00120011
ECM17	1.44271	8.5499	35.8304	1.41478e-05	0.000479211
ITS1	-1.44259	2.93018	6.59141	0.0198756	0.0624173
CAALFM_C110810WA	-1.43855	0.689523	17.9357	0.000546911	0.00520119
CAALFM_C103870CA	-1.43752	4.18584	13.2418	0.00200251	0.0124032
MCM3	-1.43727	6.49383	55.1015	4.73425e-07	4.92933e-05
CAALFM_C109240CA	-1.43696	3.35328	17.9491	0.000545039	0.00519983
CAALFM_C306950WA	-1.43497	6.54383	18.1172	0.000419418	0.00442746
CAALFM_C110710CA	-1.43443	2.49054	37.9313	1.00548e-05	0.000384308
CAALFM_C303690WA	-1.43188	2.82469	29.9944	3.95362e-05	0.000932413
CAALFM_C201760CA	-1.43105	2.61327	11.0118	0.0040219	0.0204791
CAALFM_CR02100CA	-1.42913	3.72251	56.0985	4.15784e-07	4.59937e-05
MAE1	1.42905	5.31722	30.7417	2.31725e-05	0.000660087
CAALFM_C107660WA	-1.4256	4.62404	14.5186	0.00137794	0.00967603
BUL1	-1.42479	6.2199	13.1799	0.00204002	0.0125327
MCM6	-1.42347	5.92943	72.0312	1.50072e-07	2.43784e-05
CAALFM_C105920WA	-1.42282	4.06874	20.2745	0.000238912	0.00295654
CAALFM_C300830CA	-1.42074	5.41581	45.6412	3.19138e-06	0.000170555
CDG1	-1.41587	8.62807	9.66883	0.00572814	0.0260484
USO5	-1.41249	2.64628	33.5507	2.08287e-05	0.000607654
RIC1	-1.41244	2.57294	29.7012	2.85209e-05	0.000748858
PRM1	-1.40981	3.27156	31.9009	2.78724e-05	0.000740691
CAALFM_C503880CA	-1.40859	1.84971	18.4036	0.000485613	0.00478717
CAALFM_C109130WA	-1.40841	8.54816	17.9014	0.00044456	0.00455806
CAALFM_C202750CA	-1.40691	1.89988	17.4913	0.000613256	0.00568014
CYB2	1.40685	8.10866	8.25233	0.00968644	0.0375941
CAALFM_C403690CA	-1.40474	1.52588	23.2836	0.000154033	0.00218599
ASE1	-1.40457	3.52191	60.2535	2.46498e-07	3.23609e-05
CAALFM_CR08990CA	-1.40367	10.8706	15.9356	0.000769027	0.00663451
SFT1	-1.4034	3.09511	10.9527	0.00410044	0.0207218
CAS1	-1.40075	2.88954	35.8609	1.40763e-05	0.000479211
HOF1	-1.39795	2.74429	27.2946	6.65742e-05	0.00127632
CAALFM_CR06870CA	-1.39116	3.32608	28.0687	5.71462e-05	0.00118187
ERG28	-1.39056	1.40654	16.7426	0.000746432	0.00650462
CAALFM_C306640WA	-1.39011	2.1106	10.1608	0.0053377	0.0247386
CAALFM_C700380WA	-1.38655	3.11331	45.6902	3.16966e-06	0.000170555
MPH1	-1.38391	4.28798	50.8071	8.45836e-07	7.19437e-05
CAALFM_C700500WA	1.37831	-0.454628	0.717326	0.412151	0.556958
CAALFM_C403880WA	-1.37754	2.58407	29.8984	4.02543e-05	0.000934985
AHP1	1.3773	7.97898	22.2843	0.000145587	0.00211855
BIO32	-1.37566	3.84905	8.80937	0.00855344	0.0342081
HOS3	-1.3756	6.70249	17.6362	0.000590688	0.00550489
QDR1	-1.37555	5.33965	8.4674	0.00968276	0.0375941
CAALFM_C109300CA	-1.37444	1.17164	21.1117	0.000251864	0.00303594
tR(ACG)2	1.37347	-0.460086	9.06085	0.00781772	0.0321546
TUS1	-1.3734	8.39327	31.4836	2.00378e-05	0.000596098
SPO1	-1.37174	2.23925	12.8396	0.00196066	0.0122954
CAALFM_C107650WA	1.37127	3.8784	18.707	0.000449999	0.00459821
CAALFM_CR04410WA	-1.37084	1.48241	10.575	0.00464488	0.0226213
CAALFM_C208910CA	-1.37058	6.32868	32.3521	1.69499e-05	0.000533128
CAALFM_CR00380WA	-1.36969	3.14067	4.92707	0.0401863	0.102718
FTR2	1.36803	5.34864	53.451	1.14647e-06	8.87631e-05
HOL4	-1.3676	8.62482	24.2602	9.16636e-05	0.00156346
CAALFM_C208690CA	-1.36742	3.34805	17.3408	0.000518053	0.0050182
MOH1	-1.36675	6.59397	22.9642	0.000123837	0.00188376
EFH1	-1.36664	1.69873	17.4225	0.000624313	0.00575232
CAALFM_C601960WA	-1.36255	3.61615	36.1881	8.36894e-06	0.00034381
FAV1	-1.36048	2.78453	25.4392	9.7126e-05	0.00161379
SMC1	-1.36043	4.69803	55.0187	9.46655e-07	7.62247e-05
CAALFM_CR06100CA	-1.36002	3.40281	27.7138	6.12694e-05	0.00121649
CAALFM_C303380WA	-1.35537	4.95129	26.9326	5.07345e-05	0.00108263
SAP4	-1.35473	1.76336	14.7886	0.00127594	0.00927665
CAALFM_CR00010CA	-1.35438	5.36973	41.6062	5.70735e-06	0.000263104
SMI1B	-1.35404	3.65099	61.68	4.38732e-07	4.64825e-05
CHS8	-1.35292	4.9262	48.1416	2.26856e-06	0.000139588
CAALFM_C112000CA	-1.35045	-0.725683	5.37392	0.0330281	0.0892106
RHD3	-1.34961	5.70603	4.05878	0.0598805	0.138128
CDC20	-1.34923	3.4872	37.8454	1.01935e-05	0.000384742
CAALFM_CR07260CA	-1.34877	-0.0409887	7.41765	0.0143562	0.0497402
CAALFM_C702140WA	-1.34784	0.833604	18.805	0.000439125	0.00452359
CAALFM_C304940WA	-1.34734	6.1391	67.8723	2.27266e-07	3.16487e-05
CAALFM_C503080CA	1.34688	5.53507	10.8127	0.00429342	0.0213751
CHS1	-1.34574	3.79546	56.0875	8.32796e-07	7.18465e-05
CAALFM_C107990CA	-1.34436	6.21734	10.5381	0.0042132	0.0210686
CAALFM_CR02500WA	-1.34359	3.79271	19.4964	0.000370275	0.00405824
EST3	-1.34307	0.749271	15.246	0.0011219	0.00846892
CAALFM_C206610CA	-1.34303	-0.741462	3.52095	0.077703	0.165929
CAALFM_CR03710CA	-1.34105	5.87731	10.9878	0.00405367	0.0206062
ASF1	-1.33965	1.45644	18.615	0.000460487	0.00466591
CAALFM_C201860CA	-1.33897	1.21451	10.2934	0.00510401	0.024043
CAALFM_CR09810WA	-1.33806	1.16776	17.557	0.000602908	0.00561011
CHL4	-1.3377	1.34587	21.8813	0.000210888	0.00268812
VPS28	-1.33725	4.2077	33.8739	1.96961e-05	0.000591765
DYN1	-1.33718	8.23763	37.831	6.28152e-06	0.000280993
CAALFM_C307470WA	-1.33687	1.83297	29.3762	4.44224e-05	0.00099269
AYR2	1.3361	6.10755	13.6233	0.00178763	0.0114724
CAALFM_C404860WA	-1.33582	4.69549	13.7648	0.00171464	0.0111969
ACO2	1.33232	6.01441	34.7081	1.70777e-05	0.000534365
CAALFM_CR09930WA	-1.33034	4.94919	16.3269	0.000834207	0.00700647
CAALFM_C304100WA	-1.33031	0.884127	8.38105	0.00999398	0.0383929
PMM1	-1.3289	3.42946	11.1957	0.00378824	0.0195365
CDC14	-1.32826	3.9115	25.9017	8.82588e-05	0.0015099
CAALFM_C306810WA	-1.32623	3.51798	24.9034	7.92274e-05	0.00141832
FAA21	-1.32607	6.95714	20.9092	0.00020373	0.0026257
CAALFM_C601360WA	-1.32417	3.11704	5.2666	0.0346035	0.0918552
CAALFM_C603420WA	-1.32399	0.663761	13.7133	0.0017408	0.011249
CAALFM_CR01640CA	-1.32103	2.32991	30.573	3.55025e-05	0.000878688
CAALFM_C102370CA	-1.32099	3.34349	9.24627	0.00732097	0.0307042
CAALFM_C504690CA	-1.31981	1.35386	7.79569	0.0124283	0.0451319
CAALFM_C403490CA	-1.31769	0.128121	9.74463	0.00615332	0.0272833
MET3	1.31573	5.68902	10.5059	0.00475303	0.0229079
ARC35	-1.31516	3.76926	9.08302	0.00775637	0.0319296
CAALFM_C304740CA	-1.31494	3.27154	24.8202	0.000110595	0.00176689
CHS2	-1.31369	7.23439	29.799	2.79645e-05	0.000740691
CAALFM_CR02440WA	-1.31332	1.69953	26.1457	8.39489e-05	0.001461
CAALFM_C404160WA	1.31193	6.83491	9.75834	0.00554699	0.02543
ACC1	1.30835	11.6803	8.5195	0.00875055	0.0347662
TEM1	-1.30821	0.779741	21.014	0.000257675	0.00308138
TRM12	-1.30612	4.32713	24.0221	9.6802e-05	0.00161379
CRC1	1.30497	6.08423	22.5504	0.000181268	0.00241999
DCG1	-1.30415	1.50988	12.8701	0.00224011	0.0134716
MEA1	-1.30359	3.69539	21.6586	0.000221923	0.00277473
YMX6	-1.30236	6.59963	5.98815	0.0242036	0.071196
CAALFM_C302710WA	-1.30204	7.90566	12.8073	0.00198092	0.0123201
HCM1	-1.2986	2.68615	38.3011	9.48133e-06	0.000369695
CAALFM_C503520WA	-1.29779	0.95705	9.68126	0.00628943	0.0276433
CAALFM_C301120WA	-1.29753	3.84109	18.8736	0.000431692	0.00451036
GPI1	-1.2954	3.176	20.0181	0.000326301	0.00371099
CAALFM_C307110WA	-1.29527	4.19421	44.748	3.61739e-06	0.00018996
NCE103	-1.29503	7.42644	22.0455	0.000154203	0.00218599
CAALFM_C101130WA	-1.29459	9.28568	16.2177	0.000709405	0.00629089
CSM3	-1.29422	2.51324	34.9635	1.63556e-05	0.000523662
CAALFM_CR03670WA	-1.29332	2.28616	12.1331	0.00281102	0.0158356
FAS1	1.2926	11.5348	12.6112	0.00210922	0.0128923
CAALFM_C600400CA	-1.29244	1.12214	9.20459	0.00742946	0.0309424
tE(CUC)1	1.28962	-0.153347	5.84534	0.0270135	0.0768416
CAALFM_C307670WA	-1.289	5.71627	59.1999	5.79522e-07	5.54029e-05
TPO3	-1.28689	6.80877	8.72384	0.00810292	0.0329519
CAALFM_C604120CA	-1.28567	3.57373	32.7195	2.40912e-05	0.000670562
SNO1	-1.28303	3.56164	11.8214	0.00310046	0.0169906
CAALFM_C105150CA	-1.28282	-0.362953	6.2296	0.0230266	0.0688745
CAALFM_C701910CA	-1.2816	4.97691	25.4826	9.62541e-05	0.00161379
CAALFM_C201750CA	-1.27794	7.58127	15.8564	0.000786748	0.00672018
HAP2	-1.27698	6.63092	24.5617	0.000116829	0.00181837
CHT1	1.27659	3.37591	12.5882	0.00244147	0.0143285
MAK32	-1.27614	1.83018	19.9273	0.000333521	0.00375071
CAALFM_C702000CA	-1.27553	0.696713	8.68002	0.00896211	0.0354667
CAALFM_C302360CA	-1.27316	1.92523	11.315	0.00364489	0.0190246
CAALFM_CR03240CA	-1.27278	4.3519	5.60108	0.0299571	0.0827277
ARG3	-1.27091	4.93927	7.74915	0.012649	0.0456863
CDC13	-1.27076	3.98951	46.4512	2.85304e-06	0.000159533
DSL1	-1.26928	2.16189	16.5467	0.000786438	0.00672018
CAALFM_C209800CA	1.26904	0.977684	3.74543	0.0695997	0.152841
STI1	-1.26888	8.17986	12.7227	0.00203514	0.0125155
MLC1	-1.26888	2.30748	14.4874	0.00139028	0.00969507
CAALFM_C100370WA	-1.26871	2.68798	18.9833	0.000420092	0.00442746
ERO1	-1.2685	9.34311	16.6032	0.00063607	0.00582292
GRX1	-1.26737	-0.531475	6.29481	0.0224189	0.0675587
CAALFM_C204700CA	-1.2666	3.52421	21.2441	0.000244217	0.00299434
CAALFM_C112090CA	-1.26565	-0.128436	5.59529	0.0300312	0.0828499
CAALFM_C504140WA	-1.26495	-0.458367	6.11845	0.0241063	0.0709789
MET18	-1.26163	3.49888	17.7353	0.000575785	0.00540328
CAALFM_C106150WA	-1.26142	-0.469316	4.54959	0.0476496	0.1165
HHT21	-1.2598	3.85425	2.89457	0.106918	0.210487
AFG1	-1.25944	4.91708	30.3154	3.72385e-05	0.000903146
CAALFM_C110360CA	-1.25907	9.16248	8.06492	0.0104098	0.0396872
MIH1	-1.25717	7.92065	15.4739	0.000878958	0.00726133
LEU2	1.25674	4.22893	24.2287	9.23249e-05	0.00156615
GLT1	1.25587	10.1791	35.8766	8.84556e-06	0.000356122
CAALFM_C301150CA	-1.25496	6.1861	10.7021	0.00445302	0.0219279
CAALFM_C113100WA	-1.25457	5.7448	6.25209	0.0228149	0.0684448
SIT1	-1.25397	9.98931	23.0026	0.000122722	0.00187826
ERG251	-1.25362	7.36244	10.5763	0.00464285	0.0226213
CAALFM_C500120WA	1.25347	1.3732	21.2662	0.00024297	0.00299434
MPP10	1.25143	5.29155	43.7188	4.189e-06	0.000209069
CAALFM_C209980WA	-1.24875	6.4707	37.7875	1.02882e-05	0.000385746
CAALFM_C306610WA	-1.24723	4.95801	26.1884	5.95985e-05	0.00120736
SAP7	-1.24516	0.678846	11.741	0.00318041	0.017272
FTH1	-1.24376	6.82687	37.7132	6.41025e-06	0.000284644
CAALFM_C110630CA	-1.24215	3.39743	27.5257	4.47113e-05	0.00099269
CAALFM_C108770WA	1.24137	5.64207	12.3969	0.00258977	0.0149376
CAALFM_C302010CA	-1.24064	1.02379	6.40292	0.0214512	0.0656583
CAALFM_C102100WA	-1.24037	2.07235	29.8764	4.04205e-05	0.000935246
CAALFM_C304920CA	-1.23916	6.3138	33.3761	2.14706e-05	0.000620023
HSP70	-1.23914	11.2024	6.08918	0.0231805	0.0691978
CAALFM_CR03840CA	-1.2389	4.45834	6.953	0.0172076	0.056816
IHD1	-1.23773	6.28588	16.2245	0.000857562	0.00712355
MNN4	-1.23601	8.96855	10.0811	0.00494493	0.0235137
PPH3	-1.23574	2.50428	34.3416	1.81769e-05	0.000560052
CAALFM_C106030CA	-1.23406	1.73896	7.33559	0.0148182	0.0509029
TOA2	-1.23345	3.40746	6.68101	0.0191731	0.0610505
CAALFM_C501190WA	1.23321	3.61961	48.039	2.29993e-06	0.000139588
HSP78	-1.23158	8.59839	12.7849	0.00199514	0.0123703
FRP5	-1.23114	1.85599	11.0541	0.00396681	0.0203009
INT1	-1.23071	6.94348	22.717	0.000174636	0.00240128
PRR2	-1.22717	3.95709	57.0309	7.44905e-07	6.71415e-05
CAALFM_C503950WA	-1.22405	5.15366	14.9819	0.00120812	0.00893001
AMO2	-1.22307	8.12058	12.1188	0.00247398	0.0144261
CAALFM_CR05360CA	-1.21956	2.7209	19.9598	0.000330914	0.00373531
CAALFM_C402660WA	-1.21851	2.39556	8.4067	0.00990036	0.0381546
CSP1	-1.21795	2.10443	15.4156	0.00107017	0.00823801
CAALFM_CR06070WA	-1.21748	5.77583	25.4321	9.7271e-05	0.00161379
CAALFM_C404390WA	1.21735	7.43091	33.9639	1.93928e-05	0.000588508
CAALFM_C305060WA	-1.21706	3.81145	26.2081	8.28834e-05	0.00145405
CAALFM_C206430CA	-1.21474	3.88465	14.859	0.00125074	0.00916651
CAALFM_C503740WA	-1.21454	4.5658	23.2229	0.000156105	0.00220777
TEP1	-1.21404	1.18608	11.6949	0.00322732	0.0174252
CAALFM_C405360CA	-1.21288	1.21353	13.6725	0.00176186	0.0113553
CAALFM_C305820WA	-1.21242	1.08976	3.68238	0.0700046	0.153371
DDC1	-1.21153	3.53596	25.0671	7.63683e-05	0.00138495
CAALFM_C703350CA	-1.21034	3.17513	16.594	0.000776577	0.00667368
CAALFM_C304840CA	-1.20743	7.1857	26.8762	5.13525e-05	0.00109196
CAALFM_CR02270CA	-1.20703	4.86746	18.5439	0.000374205	0.00409388
RFC5	-1.20681	4.68276	24.5775	8.52765e-05	0.00147984
CAALFM_C302790WA	-1.20647	3.8651	7.62475	0.0132612	0.0471083
IPK2	-1.20571	4.60568	31.3612	2.05207e-05	0.000604511
SGA1	-1.2019	5.27658	26.0019	6.20792e-05	0.00121649
tH(GUG)3	1.20137	-0.0893392	6.88814	0.0176546	0.0579437
CAALFM_C204370WA	-1.201	4.63442	6.67733	0.0192014	0.0610669
CAALFM_C305850WA	-1.1984	3.15276	13.7674	0.00171331	0.0111969
DAP1	1.19839	4.11202	16.5162	0.00079289	0.00676152
CAALFM_C401580CA	-1.19829	2.89743	8.80378	0.00857065	0.0342542
INO2	-1.1979	5.62942	7.63166	0.0123254	0.0449205
CAALFM_C114190CA	-1.19789	5.84414	11.5355	0.00339551	0.0179991
CAALFM_C502980CA	-1.19785	2.27911	9.51031	0.00667389	0.0286044
RNR1	-1.19765	6.94873	27.6161	6.24621e-05	0.0012168
DPP1	-1.19687	1.35083	13.2326	0.00200802	0.0124246
PMC1	-1.19115	11.7388	6.03755	0.0236971	0.0701504
CAALFM_CR06790CA	-1.19112	3.77711	29.3806	4.43854e-05	0.00099269
CAALFM_C111410CA	-1.19069	1.29262	7.14823	0.0159377	0.0536573
CAALFM_C305430WA	-1.19033	4.08926	23.3566	0.000151583	0.00217954
CHR1	-1.18666	6.22203	16.8895	0.000587054	0.00548796
CAALFM_CR05310WA	-1.18657	2.27217	13.6336	0.00178222	0.0114526
CAALFM_C702310CA	-1.18648	1.90809	14.3183	0.00145951	0.0100595
CDC5	-1.18635	3.70201	16.6665	0.000624859	0.00575232
CYT1	1.18297	7.55166	26.5935	5.45779e-05	0.00114443
CAALFM_C113490CA	-1.1817	4.05419	32.238	2.62404e-05	0.000713809
MRV2	-1.18132	7.96795	5.25688	0.0347504	0.0920792
CAALFM_C304210WA	-1.18022	3.23043	4.80849	0.0423753	0.106538
CAALFM_C201630WA	1.17921	3.71758	19.2763	0.000390783	0.00425214
DRE2	-1.17722	7.88645	6.52183	0.0193178	0.0613195
CAALFM_C200760CA	-1.17622	8.98272	12.8318	0.00196548	0.0123001
HSP31	-1.17605	3.05557	2.101	0.165224	0.291633
CAALFM_C306920WA	-1.17521	3.01725	16.0827	0.000891135	0.00731191
CAALFM_C200860CA	1.17314	2.4357	6.45344	0.0210154	0.0646521
HUT1	-1.16867	2.08135	22.6372	0.000177777	0.00240865
CAALFM_C407200CA	-1.16783	4.39024	32.6925	2.42064e-05	0.000670562
CAALFM_C701500WA	-1.16742	2.42213	10.8337	0.00426382	0.0212628
CAALFM_C301220WA	-1.16708	3.2704	11.371	0.00357958	0.0187485
CAALFM_C502780WA	-1.16668	2.22302	32.1678	2.65711e-05	0.000716352
CAALFM_C100270WA	1.16492	8.95161	6.74257	0.0176304	0.0578956
CAALFM_C301180CA	-1.16487	8.26747	8.61578	0.00843845	0.0339349
CAALFM_C600730WA	1.16433	3.94845	12.5482	0.00215234	0.0130558
tP(UGG)3	1.16376	-0.729112	1.42434	0.248922	0.389542
RPS42	1.1636	7.40962	20.6496	0.000217373	0.00274627
CAALFM_C210130WA	-1.16338	1.97455	22.9966	0.000164108	0.0022941
CAALFM_C301430WA	-1.16018	3.48476	14.287	0.00147276	0.0101298
CAALFM_C407080CA	-1.15978	3.355	37.6943	1.04427e-05	0.000386891
CAALFM_C113370WA	-1.15864	3.0545	18.5155	0.000472125	0.00474404
PPS1	-1.15735	3.17375	23.7603	0.000138793	0.00204432
CAALFM_C601400WA	-1.1565	3.73295	10.0381	0.0055648	0.0254783
DSE1	-1.15479	5.72537	16.5785	0.000779786	0.0066891
CAALFM_CR01550CA	-1.15419	2.18824	16.3167	0.000836507	0.00700647
GAR1	1.15384	3.75783	15.7412	0.000978197	0.00780361
CAALFM_C405310WA	-1.1523	1.49389	7.63539	0.0132075	0.0469762
LYS4	1.15188	5.0014	29.5867	4.2687e-05	0.000961892
CRL1	-1.15177	6.1619	24.6549	0.000114537	0.00181119
IFI3	-1.15095	3.7779	27.7138	6.12689e-05	0.00121649
PCL2	1.15088	1.79974	6.91483	0.0174691	0.057491
YTH1	-1.14642	6.42049	29.6772	4.19643e-05	0.000952715
CAALFM_C202080WA	-1.14549	0.9127	2.60277	0.124906	0.235426
ESP1	-1.14468	3.97688	37.9432	1.00358e-05	0.000384308
CAALFM_C208540CA	-1.14417	1.38749	16.5021	0.000654451	0.00592538
GAL7	1.14407	7.43354	9.19354	0.00745851	0.0310025
OST1	-1.14406	4.08626	10.632	0.00455769	0.022372
CAALFM_C505090WA	-1.14383	1.51578	15.8364	0.000952997	0.00766332
STN1	-1.1436	1.44953	13.6327	0.00178265	0.0114526
CAALFM_C404620CA	1.14321	3.462	14.4823	0.00139231	0.00969802
CAALFM_C304310CA	-1.14279	0.0782085	6.20568	0.0232542	0.0692972
CAALFM_C700870WA	-1.13955	3.93796	13.7938	0.00170007	0.0111575
ALD5	1.13932	11.6788	7.41301	0.0134401	0.047501
CAALFM_CR01630CA	-1.13748	3.69393	24.7763	8.15272e-05	0.00144382
CAALFM_C109210CA	-1.13535	10.6947	8.72813	0.00808991	0.0329519
CAALFM_C301340WA	-1.13355	2.73905	17.5412	0.000605375	0.00562107
CAALFM_C305300CA	-1.13315	3.71681	13.1145	0.00208056	0.01273
RCT1	-1.13054	9.93916	5.60796	0.0285381	0.0799537
CAALFM_C503430WA	-1.13033	0.82984	3.16334	0.0930217	0.190104
CAALFM_CR09830WA	-1.12953	5.58675	4.11927	0.0581914	0.135005
CAALFM_C208920WA	-1.12826	8.73464	17.6093	0.000481299	0.00477268
CAALFM_C109670CA	-1.12703	1.84418	17.9674	0.000542496	0.00519197
CAALFM_C210060CA	-1.12663	1.66072	10.4761	0.00480065	0.0230271
IFH1	1.1266	8.34685	41.2857	5.98751e-06	0.00026984
CAALFM_C103490WA	1.12492	5.35402	9.17481	0.00750808	0.031141
CAALFM_C207070WA	1.12311	7.25913	10.3613	0.00498874	0.0236662
YCG1	-1.12243	4.47809	19.0231	0.000329757	0.00372922
MMS21	-1.12074	3.03593	16.4121	0.000815317	0.00689593
SAP3	-1.12046	2.61015	10.5204	0.0047301	0.0228521
CAALFM_C603740WA	-1.11883	0.678957	14.9291	0.00122624	0.00904181
CAALFM_CR06510WA	-1.11653	3.4499	6.39027	0.0215619	0.0659264
CDC43	-1.11471	2.92584	11.3243	0.00363393	0.0189838
PGA57	-1.11407	2.70542	18.2516	0.000504649	0.00493135
ACH1	1.11261	9.93176	4.37564	0.0499979	0.120679
CAALFM_CR04600WA	-1.11199	7.33786	21.033	0.00025653	0.00307495
RPL3	1.11148	9.5624	21.9509	0.000157769	0.0022209
CAALFM_C503770CA	-1.11046	1.36493	7.78582	0.0124747	0.0452462
RPL15A	1.10982	8.81452	35.0955	1.01782e-05	0.000384742
CAALFM_C305360CA	-1.10839	8.15825	23.6956	0.000104377	0.00168538
CAALFM_CR05480WA	1.10687	6.17206	26.7394	7.44103e-05	0.00136585
CAALFM_C602790CA	-1.10651	7.7151	23.6367	0.000142577	0.0020848
CAALFM_C102730WA	-1.10451	3.86927	10.0226	0.00559425	0.0255743
CAALFM_C301950CA	-1.10376	2.8539	15.1506	0.0011522	0.00862919
RNR22	-1.10206	7.27758	9.74235	0.00557888	0.0255234
CAALFM_C106480CA	-1.10148	4.76525	8.60065	0.0092238	0.036147
ALG11	-1.10072	4.75996	13.8195	0.00168732	0.0111379
CAALFM_C600940CA	-1.10057	1.08524	9.26759	0.00726617	0.0305361
CAALFM_C111850WA	-1.09913	9.46677	11.8084	0.00273982	0.0155506
OYE23	-1.09898	6.35046	2.12177	0.163265	0.289052
RGD3	-1.09815	5.86685	37.5898	1.06189e-05	0.00039102
CAALFM_C106840CA	-1.09796	5.24669	10.7196	0.00442745	0.02188
LAP3	1.09786	6.00137	25.168	7.46624e-05	0.00136632
CAALFM_C406360CA	-1.09717	0.394314	11.2247	0.00375279	0.0194092
PUT2	1.09617	9.36362	4.22113	0.0538138	0.127317
CAALFM_CR07220CA	-1.09496	2.75119	27.8481	5.96711e-05	0.00120736
RFC2	-1.09436	3.24328	29.9336	3.99892e-05	0.000932413
CAALFM_C301910CA	-1.09433	4.69401	12.2281	0.00272903	0.0155184
CWC22	-1.09405	4.74242	18.7998	0.0004397	0.00452359
CAALFM_C503480CA	1.09224	4.19775	22.5564	0.000181021	0.00241999
MDM34	-1.09217	9.42035	15.4048	0.00089685	0.00732893
CAALFM_C302270WA	-1.09141	1.62406	10.8806	0.00419853	0.0210686
ECM21	-1.09141	9.81043	13.2571	0.00171818	0.0111969
CFL5	-1.09078	2.17187	4.6305	0.0459239	0.113198
GTR1	-1.09037	2.57561	12.0822	0.00285614	0.0160002
CAALFM_CR07820WA	-1.08784	5.03018	2.47092	0.134216	0.248706
PRY1	1.08504	3.06436	4.35156	0.0521992	0.124499
IFA4	-1.08502	3.2203	34.6545	1.72336e-05	0.000536463
FAT1	1.08441	8.61982	14.204	0.00128257	0.00927665
HGT5	-1.08429	6.54908	12.0937	0.00284586	0.0159574
CAALFM_C205390CA	-1.08236	-0.0394412	3.84829	0.0662194	0.147728
CAALFM_C305790CA	-1.08223	2.75772	7.68612	0.0129551	0.0463833
CAALFM_C107360WA	-1.07624	7.63592	25.5385	6.87544e-05	0.00130569
SET3	1.07546	6.59084	7.57554	0.0135125	0.0476925
CAALFM_C107830CA	-1.07463	1.60897	13.3773	0.00192305	0.0121734
CAALFM_C204450WA	-1.07404	1.86921	6.17146	0.0235843	0.0698851
ACS2	1.07399	8.27935	12.6006	0.00211636	0.0128968
KIP1	-1.0732	3.70317	26.6973	7.50439e-05	0.00136915
RRD1	-1.07106	4.52987	32.2563	2.6155e-05	0.000713809
CAALFM_C504470CA	-1.07097	8.97458	6.19467	0.0221641	0.0670249
CAALFM_C102410CA	-1.0706	2.91501	11.2188	0.00376	0.019424
CAALFM_C105740CA	-1.06947	1.0379	15.7153	0.000985176	0.00782826
CAALFM_C700410CA	-1.06928	3.97748	31.8187	2.82873e-05	0.00074597
CAALFM_C101510WA	-1.06904	8.34891	16.2482	0.000703289	0.00624583
ALG8	-1.06568	4.45905	13.7232	0.00173573	0.0112469
CAALFM_C602250WA	-1.06547	2.83297	9.57087	0.00653475	0.0283003
CAALFM_C402510WA	-1.06474	6.81721	5.11505	0.0369773	0.0965856
MHP1	-1.06454	8.64371	21.7329	0.000166345	0.00231999
CAALFM_CR10190CA	-1.0645	2.19527	18.4932	0.000474777	0.00475486
CAALFM_C503650CA	-1.06384	1.02398	14.5029	0.00138414	0.00968577
CAALFM_C702220CA	-1.06271	5.91302	24.8151	8.0818e-05	0.00143547
ZCF8	-1.06196	5.39729	19.3576	0.000383061	0.00417564
tI(UAU)1	1.06158	1.65205	6.20511	0.0232597	0.0692972
PHO112	-1.06133	1.50053	12.2478	0.00271227	0.0154523
CAALFM_C701100CA	-1.06125	3.47022	34.9683	1.63422e-05	0.000523662
CAALFM_C602400WA	-1.06123	1.21916	4.39395	0.0511845	0.122563
PIKA	-1.05949	4.63981	36.1239	1.34773e-05	0.000473196
CAALFM_C602880WA	1.05885	1.62446	11.7434	0.00317798	0.017272
CAALFM_C101360CA	1.05863	6.86117	19.2064	0.000397567	0.00429592
CAALFM_CR04680CA	1.05833	0.346285	2.50556	0.129805	0.242242
PHR3	1.05686	5.604	24.9221	0.000108241	0.00173936
CAALFM_C303470WA	1.05621	8.04063	3.69204	0.0696687	0.152881
ZCF14	-1.05599	1.86967	10.6998	0.00398394	0.0203201
CAALFM_CR03250CA	-1.0529	8.4241	13.2996	0.00169546	0.0111575
CAALFM_C503150WA	-1.05283	8.58908	27.7646	4.25124e-05	0.000961544
CAALFM_C103270WA	-1.05156	5.7928	23.3257	0.000152616	0.00218246
CAALFM_C207540WA	1.05024	4.75978	38.3903	9.34854e-06	0.000369695
CAALFM_C600220CA	-1.04997	0.858359	1.78818	0.198597	0.332518
CAALFM_C200880WA	1.04968	3.56353	30.7655	3.42637e-05	0.000865769
CAALFM_C307540CA	-1.04906	1.83357	13.0006	0.00215327	0.0130558
CAALFM_C306600CA	-1.04842	3.62308	18.7121	0.000449428	0.00459821
SMM1	-1.04733	6.20383	13.2587	0.0019924	0.012366
HCH1	-1.04706	4.20008	8.16607	0.0108191	0.040759
CAALFM_CR07190WA	-1.04678	6.47373	31.8877	1.85297e-05	0.000568026
ARO9	-1.04641	5.26879	14.5077	0.00138221	0.00968508
CAALFM_C112640WA	-1.04613	0.957542	4.87156	0.0411943	0.104395
CAALFM_C306660CA	-1.04606	0.788368	5.99239	0.0254014	0.0738916
CAALFM_C602280WA	-1.04574	4.20268	41.3371	5.94158e-06	0.00026984
FGR6-1	-1.04565	2.96559	29.7052	4.17429e-05	0.000951265
ALG5	-1.04542	1.56662	8.99621	0.00732142	0.0307042
CAALFM_C504480CA	-1.04443	1.94905	15.7426	0.00097781	0.00780361
SEF1	-1.04439	8.18411	13.7022	0.00149577	0.0102183
PCL5	-1.04408	5.69928	15.8082	0.00079776	0.00677591
SDH12	1.04389	8.71881	26.8446	5.17027e-05	0.00109214
PDX3	-1.04234	7.84206	22.6113	0.000134641	0.00199649
POL93	1.04198	10.3114	4.92924	0.0386547	0.0999692
CAALFM_C601810WA	-1.04135	0.787352	7.69091	0.0129315	0.0463462
CAALFM_C112570CA	-1.04102	5.81708	31.724	2.87742e-05	0.000752239
CAALFM_C406160WA	-1.04012	3.28559	18.5802	0.000464512	0.00469881
CAALFM_C112580WA	-1.03959	5.28312	35.7766	1.42746e-05	0.000479211
CAALFM_C306690CA	-1.03896	2.77358	10.9277	0.00413423	0.0208195
ECM22	-1.03743	9.03179	9.33585	0.00646242	0.0280969
CAALFM_C407260WA	1.03671	1.90406	5.20101	0.0356088	0.0939456
MTLA1	-1.03642	3.70085	31.5111	2.99029e-05	0.000778379
PDR16	-1.03635	8.88907	8.74683	0.00803345	0.0328019
UAP1	-1.03583	5.53489	9.46382	0.00678298	0.0289948
GIN4	-1.03517	5.54068	34.2248	1.19311e-05	0.000423833
CAALFM_C102500WA	-1.03483	2.99167	8.87618	0.00835063	0.0336645
CAALFM_C306040WA	1.03454	3.60463	10.3694	0.00497527	0.0236394
DLD2	-1.0344	3.27235	14.2342	0.00149536	0.0102183
CAALFM_C201250WA	-1.03414	1.81451	20.3347	0.000302484	0.00348608
CAALFM_C604180WA	-1.0332	7.11493	12.3253	0.00231308	0.0137352
CAALFM_C200410CA	1.03211	6.17149	25.198	7.41645e-05	0.00136549
FGR29	-1.03001	2.85465	13.7949	0.00169953	0.0111575
ACO1	1.02981	11.0638	11.9229	0.00263819	0.0151516
ITR1	1.02895	6.86462	11.7763	0.00276908	0.0156871
CAALFM_C701680CA	-1.02891	7.50568	8.56769	0.00859275	0.0342972
CAALFM_C103840WA	-1.0285	0.235586	2.21364	0.154932	0.278546
SFL2	1.02651	6.21619	5.40799	0.0325453	0.088135
HMS1	-1.02537	6.88864	5.775	0.0278259	0.0784137
CAALFM_C206260WA	-1.02517	1.24595	11.5746	0.00335335	0.0178487
CAALFM_CR07680CA	-1.02464	1.32857	10.7101	0.00444138	0.0219218
ROD1	-1.02381	6.52137	10.3945	0.00493359	0.0234783
RPS23A	1.0225	8.17297	26.5649	5.49171e-05	0.00114756
CAALFM_C104710CA	-1.02235	3.25502	20.0768	0.000251204	0.00303594
BUD7	-1.02185	4.91397	22.6879	0.000175773	0.00240156
FDH1	1.01966	7.99303	11.7875	0.00313388	0.0171117
SFC1	1.01962	6.72882	6.7263	0.0188288	0.0603861
CAALFM_C204070CA	-1.01884	6.99408	4.15902	0.0554414	0.129923
CAALFM_C402600CA	-1.01852	2.44598	9.28882	0.00657437	0.0283996
MPS1	-1.01807	3.63748	31.2003	3.16408e-05	0.000816576
CAALFM_C403730CA	-1.01749	3.05679	12.05	0.0028851	0.016073
MNN4-4	-1.01581	4.5778	8.23953	0.0105288	0.0399896
CAALFM_C206520CA	-1.01509	3.66965	15.185	0.00114118	0.00857784
SOD6	-1.01399	5.5479	19.5557	0.000364962	0.00401458
CAALFM_C204750WA	-1.01373	4.94357	19.9929	0.000256628	0.00307495
CAALFM_C204730WA	-1.01311	3.90714	10.5302	0.00422478	0.0211029
SAP6	-1.01274	2.79108	11.4384	0.00309897	0.0169906
SAH1	1.01158	8.24024	11.6724	0.00286611	0.0160225
HYR4	-1.011	6.55523	23.7738	0.000102505	0.00166854
PGA5	-1.01084	0.445896	8.94978	0.00744845	0.0310001
CAALFM_C210150WA	-1.01045	1.26135	7.6946	0.0129134	0.0463363
CIP1	-1.00977	6.54742	5.33538	0.0335842	0.0901001
CAALFM_C208850CA	1.00822	5.2766	27.4835	6.41233e-05	0.00124116
CAALFM_C209860CA	-1.00732	3.3479	12.1703	0.00277861	0.0157263
tL(AAG)1	1.00695	0.948062	10.2398	0.00519702	0.0243671
PEX19	1.00684	6.30739	13.4806	0.00186481	0.0118839
SEC2	-1.00651	7.85863	12.8146	0.00197634	0.0123201
CAALFM_CR10530WA	-1.00613	2.79157	12.5571	0.00246497	0.0144261
CAALFM_C206140CA	-1.00603	0.391878	3.99658	0.0616771	0.140607
PGA17	1.00511	4.79377	3.82929	0.0668289	0.148735
CAALFM_C600180CA	-1.0043	1.42594	14.0212	0.0015907	0.0106264
PHM7	-1.00238	9.11988	4.86283	0.0398469	0.102181
MSI3	-1.0008	9.4713	8.77991	0.0079347	0.0325086
IQG1	-1.00063	4.29925	9.31802	0.00713839	0.0301039
CAALFM_C102210WA	-1.00036	5.76118	20.7452	0.000212233	0.00269654
CAALFM_C301970CA	-1.00034	-0.120596	6.22353	0.0230841	0.0689726
BMT1	-1.00017	6.13755	9.31758	0.00650565	0.0282645
CAALFM_CR06520CA	-0.999648	2.7925	6.47939	0.0207954	0.064237
CAALFM_C703140WA	-0.999607	2.75914	8.25021	0.0104873	0.0398823
CAALFM_C505230CA	0.999271	8.39458	23.7928	0.000102056	0.00166854
CAALFM_C505240CA	-0.999153	1.45746	7.33639	0.0148137	0.0509029
CAALFM_C209550CA	-0.998343	-0.122828	5.59734	0.030005	0.0828154
END3	-0.996732	4.50134	14.1681	0.00152426	0.010366
AGA1	0.994835	4.38484	4.42482	0.0504598	0.121454
RAD52	-0.994561	4.35881	40.241	7.01301e-06	0.000301099
CAALFM_C102770WA	0.993659	2.53866	30.6087	3.52687e-05	0.000876491
tD(GUC)4	0.993526	1.78769	6.82966	0.018069	0.0588559
CAALFM_CR06430WA	-0.993045	0.698406	14.403	0.00142438	0.00986882
GEF2	-0.992116	7.49189	7.76952	0.0125518	0.0454088
UGA1	0.991304	10.9624	3.85351	0.064319	0.144643
TRP1	0.991113	3.27472	18.2051	0.000409624	0.00436579
CAALFM_C103990WA	-0.989004	4.93386	5.90225	0.0263762	0.0758864
CAALFM_C205510CA	-0.988853	2.99702	13.7117	0.00174164	0.011249
CAALFM_C401970WA	-0.988573	4.97512	14.3225	0.00145776	0.0100595
CAALFM_C604340WA	-0.987823	2.83082	8.04299	0.0113261	0.0422735
LIP7	-0.987328	1.50864	6.51037	0.0205363	0.0636948
HHT2	-0.987233	3.15549	1.60166	0.220835	0.358694
CAALFM_C401760WA	-0.986806	3.90594	6.79599	0.0183126	0.059393
ARG1	-0.986805	9.20689	11.3719	0.00316898	0.017272
PHR2	0.986482	8.13456	9.92875	0.00577629	0.0262081
TUF1	0.986402	8.26206	24.7394	8.22094e-05	0.00144741
CAALFM_C301110CA	-0.986401	2.43638	10.5345	0.004708	0.0227635
CAALFM_C108890CA	-0.986266	0.808486	4.86683	0.0412815	0.104572
FUS1	-0.985498	0.514692	9.80602	0.00602459	0.0269277
CAALFM_C301570WA	-0.985463	2.62738	6.57165	0.0200344	0.0628182
CAALFM_C405580CA	0.985374	6.11693	2.01605	0.173548	0.302469
CAALFM_C306270CA	-0.983836	3.35503	18.1861	0.000513093	0.0049977
CHK1	0.983524	10.0208	16.7761	0.000605948	0.00562107
CAALFM_C502200WA	-0.982736	2.34145	25.9608	8.71919e-05	0.00149589
CAALFM_C102200CA	-0.981839	3.36484	32.1707	2.65578e-05	0.000716352
CAALFM_C106980CA	-0.981456	8.75099	4.54441	0.0461793	0.113672
CAALFM_C113240WA	-0.979948	5.88109	15.2353	0.000942508	0.00758908
RPN6	-0.979617	5.10722	10.8045	0.00430508	0.0214155
CAALFM_C112880CA	-0.978691	3.96474	14.8911	0.00123944	0.00912805
OLE1	0.978506	11.5589	13.9786	0.00137386	0.00966985
RPS14B	0.977775	6.53171	23.2505	0.000115779	0.00181136
CAALFM_C112650CA	-0.9772	3.38457	6.10332	0.0242577	0.0713205
CAALFM_C603300CA	-0.976051	4.36752	17.5088	0.000494705	0.00484988
CAALFM_C113060CA	0.975402	7.22084	27.4487	4.5447e-05	0.000994401
CAALFM_C604230WA	-0.974027	0.591014	5.96705	0.0256711	0.0744969
CAALFM_C603260WA	0.97269	5.25555	9.24136	0.00733367	0.0307342
FUR1	0.971661	3.64176	27.839	5.97783e-05	0.00120736
CAALFM_C208750WA	-0.971574	-0.244483	5.57148	0.0303382	0.083552
RFC3	-0.971002	3.44332	24.629	0.000115168	0.00181119
HYR1	-0.970926	3.39713	6.78944	0.0183604	0.0594287
TVP18	-0.970432	3.30534	14.8401	0.00125744	0.00919328
MET16	0.969735	4.69829	18.0777	0.000527439	0.00508007
HHF22	-0.968182	2.8019	5.88469	0.0265709	0.0761204
CAALFM_CR05030WA	-0.967528	6.1369	46.2862	1.62298e-06	0.000112657
HIR1	0.967294	6.08425	38.8716	8.66706e-06	0.000351278
ARR3	-0.96667	8.20722	4.54613	0.0461421	0.113643
CAALFM_CR06310WA	-0.966185	1.40891	6.83212	0.0180514	0.0588559
CAALFM_CR07140CA	0.966181	2.26291	8.45008	0.00974429	0.0377217
CAALFM_C402100CA	-0.966134	2.39099	11.5966	0.00332991	0.0177691
SAP5	-0.965516	2.62833	6.63401	0.019538	0.0617645
CAALFM_C203110WA	-0.964726	6.5675	2.84751	0.107721	0.211512
CAALFM_C601300WA	-0.963639	4.1942	10.5095	0.00474732	0.0228986
RAD53	-0.963433	4.35034	18.1997	0.000511334	0.00498861
HGT2	-0.962836	10.0052	8.45145	0.00897894	0.0354868
CAALFM_C302070CA	-0.962763	1.91454	3.95892	0.0627953	0.142457
CAALFM_C102390WA	-0.962064	4.68414	33.3521	2.15607e-05	0.000620023
CAALFM_C701050WA	-0.959639	0.612095	5.1832	0.0358874	0.0943921
ALP1	0.959275	5.55771	11.4828	0.00345336	0.0181828
CAALFM_C602950CA	-0.959145	1.65556	11.6176	0.00330769	0.0177344
CAALFM_CR03440WA	0.958052	1.82161	13.8595	0.00166765	0.0110427
CAALFM_C105100WA	-0.95709	1.66625	11.2768	0.0036901	0.0191943
SPO11	-0.956819	4.21234	14.4575	0.00140226	0.00974485
RMS1	-0.956477	5.50287	10.9602	0.00409037	0.0207064
CAALFM_C302670WA	-0.955761	2.86598	14.2053	0.00128207	0.00927665
MNN24	0.953472	5.3497	6.52808	0.0203898	0.0635165
RPS21	0.953235	9.27972	26.2797	5.84239e-05	0.00120008
RTA4	-0.952155	3.12916	6.7922	0.0183403	0.0594189
PGA10	-0.952045	0.936672	6.01901	0.0251214	0.073289
UGP1	0.950606	7.21522	13.1341	0.00206828	0.0126805
CAALFM_C306990WA	-0.950319	2.97759	6.51408	0.0205054	0.0636587
NUP	-0.950249	-0.0325893	4.43103	0.0503156	0.121203
CAALFM_C111680CA	-0.94862	1.80163	6.59538	0.0198438	0.06235
CAALFM_C210200WA	-0.947451	1.7617	6.80014	0.0182824	0.0593587
PCK1	0.947095	11.8231	5.44946	0.0305998	0.0840397
CAALFM_C701830WA	-0.946167	1.79239	13.819	0.00168756	0.0111379
FCR1	-0.945265	8.59926	6.80436	0.0171883	0.0567835
CAALFM_C702290WA	-0.944807	1.20997	7.03394	0.0166677	0.0555794
CAALFM_CR01920WA	-0.944201	0.243692	8.5911	0.00949134	0.0370512
CAALFM_C504790CA	-0.94396	2.15657	16.0328	0.000903311	0.00734415
ACP12	0.943342	3.78034	40.6239	6.61593e-06	0.00029116
QCR9	0.941897	4.69472	28.2083	5.561e-05	0.00115803
CAALFM_C303780WA	-0.940828	0.114954	1.51546	0.234907	0.374467
RDN18	-0.9402	17.9342	1.15763	0.295315	0.441124
GIT3	0.937697	5.24639	10.146	0.00536446	0.0248435
GSG1	-0.937475	3.04215	11.9425	0.00298422	0.0165043
COX8	0.937463	6.6908	25.3045	7.24234e-05	0.00135328
CAALFM_C302420CA	-0.936953	3.96945	12.8084	0.00228255	0.0136209
CAALFM_C112760WA	-0.936258	4.71634	15.5123	0.00104186	0.00809758
CAALFM_C209240CA	-0.934567	2.01807	3.29177	0.0853119	0.177594
CAALFM_CR01080WA	-0.934417	5.81598	14.979	0.00101653	0.00796395
CAALFM_C700460WA	-0.933968	1.69593	7.41133	0.0143912	0.0497854
RPL13	0.933939	9.20129	20.1748	0.000245021	0.00299531
ISA2	-0.933811	5.68443	10.8199	0.00428327	0.0213422
RLI1	0.933356	8.01915	22.1647	0.000149832	0.00216467
CAALFM_C302340WA	-0.933113	1.73933	7.47881	0.0140225	0.0489775
BUB3	-0.932907	7.15742	17.9878	0.000434299	0.00452195
SPC98	-0.9326	3.62447	22.652	0.000177191	0.00240865
RAD57	-0.932342	4.87818	2.63487	0.122758	0.23233
HAP43	-0.931235	8.15382	14.8447	0.00105787	0.00817707
CAALFM_C300440WA	-0.929615	0.973767	6.841	0.0179878	0.0587497
SKN1	-0.929144	8.32901	5.84055	0.0257912	0.0747375
CAALFM_C205760CA	0.929019	5.34136	21.6177	0.000171083	0.00236424
ERG6	0.928838	5.63984	3.68001	0.0718545	0.156202
SOK1	-0.928518	10.5249	9.92751	0.00522179	0.0244477
ZFU2	-0.928487	5.42246	11.3076	0.00323831	0.0174609
MAL31	-0.928411	5.28822	11.9255	0.00300016	0.0165612
HAC1	-0.928173	8.27167	13.8942	0.00140989	0.00978659
PHO87	0.927704	4.90041	2.94946	0.10202	0.203603
CAALFM_C704310CA	0.926923	5.4884	23.4858	0.000147353	0.00213397
GIN1	-0.926345	3.01077	29.7602	4.13129e-05	0.000948106
CAALFM_CR00310CA	-0.925377	7.10537	6.16689	0.0236288	0.0699826
CAALFM_C106340WA	-0.924144	0.945754	5.45178	0.0305684	0.0840397
CAALFM_C504860CA	-0.923107	2.63531	6.94067	0.0172916	0.0570311
TUB4	-0.923107	1.69183	15.1433	0.00115456	0.00862919
CRD2	0.922808	4.72825	7.33305	0.0148328	0.0509239
SDS24	-0.921998	9.51752	12.8101	0.00197916	0.0123201
CAALFM_C108080CA	0.921954	5.23467	21.0794	0.000195302	0.00256155
CAALFM_CR09590WA	-0.921528	3.34941	9.66403	0.00632703	0.0277113
RPL37B	0.921365	7.63041	23.0854	0.000120354	0.00185887
FAV2	0.920386	2.16448	6.27084	0.0226401	0.0680218
RPP1A	0.917079	6.91	21.5954	0.000225171	0.00280373
CAALFM_CR04850CA	-0.916396	1.86958	5.13947	0.0365826	0.0958032
CAALFM_C205900WA	-0.916312	0.168625	4.31821	0.0513789	0.122833
CAALFM_C307350WA	-0.915799	4.83353	16.7065	0.000753635	0.00653338
CAALFM_CR04710WA	-0.9157	0.759943	5.52179	0.0296388	0.0822005
MON2	-0.915519	4.99101	36.9472	1.17789e-05	0.000420904
HSP30	0.915477	9.56924	2.88473	0.105597	0.208389
DPB2	-0.915061	5.78574	14.7663	0.00128402	0.00927665
SLY41	-0.91373	7.70947	11.8329	0.00271772	0.0154687
CDC47	-0.912213	5.17165	26.011	8.62988e-05	0.00148902
ENO1	0.912153	10.0122	8.67422	0.00825511	0.0333686
PHO84	0.912097	10.7467	6.30777	0.0211298	0.0649379
CAALFM_C205860CA	0.911866	4.40482	10.2732	0.00513888	0.0241696
CAALFM_C501590WA	-0.910953	2.40422	7.48464	0.0139912	0.0489166
CAALFM_C106250WA	-0.910799	2.79775	14.9755	0.00121027	0.00893501
CAALFM_C307140CA	-0.909649	2.45219	14.0553	0.00157499	0.0105917
CAALFM_C202490CA	0.909567	7.26488	34.8735	1.6606e-05	0.000525046
CAALFM_C702370WA	-0.909516	6.81834	20.7877	0.000271718	0.00320489
PGA56	0.90949	10.0933	12.2304	0.00238555	0.0140962
SDA1	0.907071	5.95285	20.6255	0.000218691	0.00275141
CAALFM_C303670WA	-0.905965	6.25422	7.78224	0.0124916	0.0452803
EBP7	-0.905921	3.57805	11.201	0.00378169	0.0195193
CAALFM_C405220CA	-0.905826	3.87093	12.6845	0.00237049	0.0140209
MSH2	-0.904467	5.04802	17.3548	0.000516062	0.00501045
FLC1	-0.903108	9.57694	9.6084	0.00585417	0.0264028
DAL5	-0.901533	3.27812	6.98071	0.0170206	0.0564454
LEU4	0.901358	3.89232	17.4381	0.000621783	0.0057503
FAS2	0.90074	11.3048	4.13584	0.0560631	0.131024
CAALFM_C402040WA	-0.90051	4.64407	20.5873	0.000284874	0.00333402
CUP9	-0.900333	10.484	5.80634	0.0261758	0.0755619
GPX2	-0.900218	5.90519	8.90885	0.00825344	0.0333686
PEP8	-0.898983	5.63427	19.1982	0.000398363	0.00429592
CAALFM_C407020CA	-0.898436	2.02886	8.02269	0.0114123	0.0425425
CAALFM_C303020WA	-0.898343	3.40908	5.86865	0.0267503	0.0763808
CAALFM_C503530CA	0.897772	2.11934	8.63935	0.00909515	0.0358289
CAALFM_C301140WA	-0.897739	1.36482	8.003	0.0106619	0.0403427
CAALFM_C209910CA	-0.897294	0.359442	3.78139	0.0683954	0.151411
CAALFM_C404760CA	-0.897165	4.91843	9.91561	0.00524396	0.0244707
CAALFM_C111610CA	0.897077	5.79041	15.5433	0.00103297	0.00804919
LAC1	-0.896837	3.64313	12.7776	0.00230406	0.0136951
CAALFM_C505350WA	-0.896541	3.71174	23.3153	0.000152965	0.00218246
CAALFM_C302580CA	-0.895395	2.43079	9.38483	0.00697298	0.029634
CAALFM_C503700CA	0.895369	4.04485	21.1344	0.000250533	0.00303594
CAALFM_C201730WA	-0.894431	1.08785	5.35873	0.0332461	0.089511
CAALFM_C302930WA	-0.894257	1.02118	8.06488	0.011234	0.0419557
PHO100	-0.89295	1.32701	6.86135	0.0178431	0.0584321
YMC1	0.892707	4.03069	19.1095	0.000407178	0.00435545
CAALFM_C501200WA	-0.892529	3.41726	10.1345	0.00538547	0.0249041
CAALFM_C209960WA	-0.891844	2.13691	12.6022	0.00211534	0.0128968
RPA135	0.891765	8.5738	18.0276	0.000429654	0.00449685
GNP3	0.891425	8.0182	5.26131	0.0332698	0.089535
RPP1	-0.891172	3.19457	10.6043	0.00459982	0.0224562
CAALFM_C500810CA	-0.890854	-0.19268	4.42375	0.0504849	0.121465
CMK1	-0.890225	6.95351	5.42928	0.0322477	0.0876435
SWI6	-0.890056	4.7357	22.2065	0.000195863	0.00256155
CAALFM_CR10120CA	-0.889276	1.43527	7.10809	0.0161899	0.0542267
FMA1	-0.88908	1.50187	8.21524	0.0106238	0.0402492
NUC2	0.888421	7.14903	35.0287	1.61768e-05	0.000523662
RAD54	-0.888276	3.74444	7.43858	0.014241	0.0494962
tG(CCC)1	0.888216	-0.188455	2.42191	0.13789	0.254032
VMA5	-0.88747	4.63185	6.23634	0.022963	0.0687182
AKR1	-0.887306	7.93282	12.1178	0.00247482	0.0144261
CDR11	-0.886708	11.8254	7.75518	0.0117418	0.0434755
CAALFM_C305510WA	-0.886454	3.53682	9.46332	0.00678417	0.0289948
PDE2	-0.886029	7.6667	9.53399	0.00661908	0.0285112
SPT5	0.885572	6.15716	16.092	0.000888885	0.00731191
CAALFM_C603280WA	0.885459	1.74136	5.99533	0.0253703	0.0738367
CAALFM_C110580CA	-0.885169	5.08806	5.11604	0.0369612	0.0965854
CYK3	-0.883852	2.7734	22.9223	0.000166833	0.00232144
VRG4	-0.883494	5.34556	6.63182	0.0195552	0.0617645
CAALFM_C112070CA	-0.882804	5.05552	5.79963	0.0275383	0.0777847
CAALFM_C113600WA	-0.882435	-0.161766	3.98771	0.0619385	0.141096
CAALFM_C102040CA	-0.881656	7.55006	6.72944	0.017726	0.0581464
MTW1	-0.881153	0.939194	5.86546	0.0267862	0.0764471
IST1	-0.88105	2.51261	11.94	0.00298657	0.0165043
CAALFM_CR06040WA	-0.879807	10.056	8.69986	0.00817606	0.03316
CAALFM_C503000CA	-0.87943	2.67892	15.3641	0.00108559	0.00831295
CAALFM_C301060WA	-0.879177	2.29363	7.761	0.0125924	0.0455089
RIB4	-0.877963	3.92613	16.2494	0.000851828	0.0070908
CAALFM_CR10140WA	0.877788	8.38712	17.7897	0.000458221	0.00465075
ORM1	-0.877774	6.01558	15.4524	0.000884489	0.00729703
STP4	-0.877632	9.32846	7.47372	0.0131197	0.0468165
CAALFM_C200170CA	0.875984	5.86055	28.8522	4.90964e-05	0.00105514
BMT7	-0.875758	4.87693	6.32954	0.0221027	0.0668727
CAALFM_C111790WA	-0.875717	2.9914	14.1566	0.00152934	0.010383
MEP2	0.87559	4.31563	21.5529	0.000227382	0.00282543
CAALFM_C106000WA	-0.874819	3.78933	12.3745	0.00260772	0.0150124
TPD3	-0.873987	6.2012	13.2527	0.00172058	0.0111969
RHO2	0.873398	3.75458	14.1045	0.00155264	0.0104647
CAALFM_CR06550CA	-0.873248	9.18803	6.63464	0.0184338	0.0595304
PHO113	-0.873101	2.69012	10.2254	0.00522231	0.0244477
CAALFM_C400100CA	0.872955	5.5865	15.5647	0.00102691	0.00802264
RDN58	-0.872159	5.45522	1.10598	0.306036	0.451982
CAALFM_C502500CA	0.869228	6.46739	26.8876	7.22221e-05	0.00135328
CAALFM_C603180CA	0.868811	8.19532	32.8036	2.37366e-05	0.000668232
FRE10	-0.868369	7.00902	2.64463	0.120228	0.228917
CAALFM_C701370WA	-0.867611	2.56059	5.73479	0.0270014	0.0768416
CAALFM_C503810CA	-0.866418	1.16287	6.18012	0.0235003	0.0697597
CAALFM_C403460CA	-0.86628	4.68601	5.06004	0.0378849	0.0983185
GIS2	0.866279	7.50963	35.8926	1.40027e-05	0.000479211
CAALFM_C604110WA	-0.864537	6.24025	15.6095	0.000844944	0.00705757
CAALFM_CR03660CA	0.864386	4.51708	18.9374	0.000424903	0.00446259
MCD4	-0.863873	3.6994	9.83437	0.00596619	0.0267482
PLB3	-0.863746	9.56477	13.4193	0.00163316	0.0108619
LIP9	-0.863596	0.53675	6.75188	0.0186374	0.0598996
CAALFM_C100160CA	0.862162	8.65774	11.7564	0.00278734	0.0157463
CAALFM_C204830WA	0.862111	5.83822	3.62471	0.0720503	0.156571
GOR1	-0.861567	5.33807	27.4653	6.43546e-05	0.00124165
WOR2	-0.860896	5.86731	5.12571	0.0368045	0.0963008
CAALFM_CR02380CA	-0.860725	2.04691	6.41312	0.0213624	0.0654581
TFB3	-0.86065	4.41958	2.99978	0.101203	0.202439
CAALFM_C303060WA	-0.860619	2.76597	12.0327	0.00290079	0.0161455
CAALFM_C106890CA	0.860573	7.93509	18.8177	0.000348048	0.00387228
CAALFM_C604530CA	0.860393	6.61024	30.0985	3.87748e-05	0.000925537
SAM2	0.860232	7.09686	6.15877	0.0225042	0.0677144
NAT2	0.860144	5.46886	33.147	2.23471e-05	0.000639592
CAALFM_C302850CA	-0.85997	4.65417	5.7093	0.0286099	0.0800625
RDN25	-0.859304	18.4264	1.06141	0.31572	0.460874
CAALFM_CR09920WA	0.859165	10.8568	12.0624	0.00252006	0.0146474
CAALFM_C209480WA	-0.859062	2.88397	7.72038	0.011903	0.0439379
MEF2	0.858635	5.41552	16.5065	0.000794945	0.00676152
HEM2	0.858467	5.43164	30.2163	3.7932e-05	0.000909236
MET15	0.858125	5.67773	2.41832	0.138164	0.254304
CAALFM_C106700WA	-0.858026	3.7429	29.2587	4.54255e-05	0.000994401
CAALFM_C112110CA	-0.85724	0.456519	2.12232	0.163213	0.289045
CAALFM_C112670CA	-0.857187	3.61749	14.2198	0.00150159	0.0102349
CAALFM_C102650WA	0.856834	6.09091	33.88	1.96752e-05	0.000591765
CAALFM_C700920CA	-0.856178	2.74538	4.00477	0.0614369	0.140431
CAALFM_C701460CA	-0.853624	2.92216	11.7894	0.00313198	0.0171117
CAALFM_C400860CA	-0.852432	6.73775	7.11889	0.0161216	0.0541179
GYP5	-0.852195	6.79739	15.614	0.00101304	0.00795543
CAALFM_C502510CA	0.85204	6.26222	17.7324	0.000576207	0.00540328
RPL21A	0.851619	8.34946	21.0483	0.000196814	0.00256155
RPS8A	0.851218	9.04363	15.7594	0.000809068	0.00685268
PES1	0.850438	6.93772	13.6101	0.00153904	0.0104196
RPS19A	0.850384	7.92563	38.1517	9.70856e-06	0.000375833
PDS5	-0.84845	5.57176	29.361	4.45506e-05	0.00099269
ALT1	0.848249	7.61109	12.0689	0.00286808	0.0160225
CAALFM_C501260WA	-0.848232	3.247	10.0781	0.00548945	0.0252481
OPT1	0.848127	4.88701	24.615	0.000115513	0.00181136
RPS5	0.847936	8.69969	17.9811	0.00043508	0.00452228
BMT8	0.84781	4.0353	15.4087	0.00107221	0.00823801
CAALFM_C208450WA	0.847501	7.63713	18.1241	0.00041864	0.00442746
KRE5	-0.847326	5.5161	5.9657	0.0256856	0.0745031
OPT7	-0.846844	3.06114	10.7813	0.00387356	0.0199594
CAALFM_C306140WA	-0.846275	3.40918	19.6614	0.000355687	0.00393181
ARA1	-0.846254	4.55281	12.6452	0.0023992	0.0141354
CAALFM_C208950WA	-0.846019	4.62759	7.51317	0.0138389	0.0485044
CAALFM_C402670WA	-0.845307	3.89715	10.8482	0.00424354	0.0211791
CAALFM_C405830WA	-0.844558	1.54255	4.82143	0.0421297	0.106208
NMA111	0.844264	7.47912	35.8422	1.41201e-05	0.000479211
CAALFM_C704090CA	-0.843767	9.01561	5.58865	0.0287806	0.0804287
CAALFM_C206620WA	-0.84358	1.19309	7.89055	0.0119917	0.0441325
SAS2	-0.843548	2.54724	21.1359	0.000250444	0.00303594
RPS26A	0.843481	8.21364	18.9369	0.000337299	0.00377912
ARP9	-0.84279	4.06707	12.4888	0.00251728	0.0146454
CAALFM_C302210CA	-0.842244	5.48624	10.2909	0.0045927	0.0224433
RPL43A	0.84217	7.68554	18.7307	0.000356135	0.00393181
CAALFM_C500920WA	0.841608	2.42079	14.7468	0.00129114	0.00930899
CAALFM_C200400CA	0.84098	6.47733	17.6141	0.000480662	0.00477268
CAALFM_CR03300CA	-0.840814	1.24593	2.83157	0.110524	0.2151
CAALFM_C504540CA	-0.839703	2.05505	12.8264	0.00227004	0.0135596
CAALFM_C703230CA	-0.839559	3.17225	2.02143	0.17116	0.299423
CAALFM_C208420WA	-0.838674	5.57424	5.80602	0.0274642	0.0777208
CAALFM_CR09510CA	-0.838075	4.95411	11.3024	0.00365968	0.0190853
ZCF1	-0.837796	8.84216	5.69013	0.0275315	0.0777847
ATO6	-0.837505	4.7854	5.90755	0.0263177	0.0758549
PGA25	0.836693	6.39735	7.77081	0.0125457	0.0454088
PGA60	-0.836546	1.15863	9.6716	0.00631047	0.0276954
DUN1	-0.836447	3.06727	22.5801	0.000180065	0.00241648
CAALFM_CR03340CA	-0.835991	3.21965	26.763	7.40559e-05	0.00136549
ASC1	0.83556	9.48173	12.3439	0.0022992	0.0136815
HGT1	-0.835208	10.2445	10.3777	0.00445531	0.0219279
GIT2	0.835061	6.04736	3.1164	0.0952866	0.194076
RAP1	-0.83461	4.28328	13.8366	0.00167885	0.0111047
PPR1	-0.834517	4.67433	13.4506	0.00161728	0.0107682
RPS4A	0.834179	9.39622	11.9172	0.0026432	0.0151589
URA4	0.833177	5.39115	26.6115	7.63566e-05	0.00138495
APL5	-0.832077	4.98791	11.1173	0.00345349	0.0181828
CAALFM_C106050CA	0.83191	4.79276	18.9297	0.000337939	0.00377928
ACB1	-0.831483	4.16206	1.95527	0.179824	0.310185
ARO3	0.83105	6.20595	14.1245	0.00154365	0.0104217
RPL2	0.830465	9.40809	21.4698	0.000177389	0.00240865
DUR1,2	0.829206	8.03569	3.58415	0.0735307	0.159027
tD(GUC)2	0.829201	1.90502	4.02827	0.0590559	0.136589
HTB1	-0.829023	5.93382	10.274	0.00513739	0.0241696
MED1	-0.82893	4.45226	25.3064	9.9855e-05	0.00163865
SSB1	0.827966	10.6896	9.89819	0.0052766	0.0245496
MDH1	0.827493	8.28276	6.9861	0.0159585	0.0536806
CAALFM_C401430CA	-0.826928	2.65876	10.0078	0.00507503	0.0239438
RPL6	0.826691	8.71334	18.8169	0.000437825	0.00452359
GCY1	-0.826395	3.7213	7.89294	0.011981	0.0441325
CAALFM_CR06960WA	-0.82634	3.79923	7.71574	0.0119247	0.043991
CAALFM_C301190CA	-0.826064	4.91332	13.9654	0.00161679	0.0107682
AXL1	-0.825557	12.1927	5.34221	0.0320907	0.0874925
CAALFM_C209560CA	-0.82549	3.62713	15.668	0.000998061	0.00787881
SWI4	-0.825469	6.3508	14.8678	0.00105063	0.00814478
CAALFM_C400070CA	0.824615	5.79984	11.5597	0.00336943	0.017912
SUA72	0.823839	3.97298	14.7391	0.00129397	0.00931378
HGT6	0.823778	9.6418	5.09547	0.0358442	0.0943195
EGD2	0.823254	5.81622	14.7769	0.00128018	0.00927665
CAALFM_C109070WA	-0.822931	5.53785	6.64667	0.0194389	0.0615905
KAR2	-0.822675	8.44743	22.0865	0.000201265	0.00261385
CAALFM_CR09500CA	-0.822545	4.91952	15.6913	0.000991686	0.00785419
ALS9	0.821657	7.45339	24.8513	8.01607e-05	0.001428
CAALFM_C305010CA	-0.821563	4.49818	12.6853	0.00236989	0.0140209
CAALFM_CR02060WA	-0.821134	4.14359	13.8128	0.00169064	0.011146
CAALFM_C702430CA	0.820153	4.10935	26.5121	7.79107e-05	0.00140449
CAALFM_C109930WA	-0.819853	1.32165	6.59706	0.0198305	0.0623405
PEA2	-0.819395	5.87978	6.61209	0.0186068	0.0598648
UCF1	-0.8186	10.6061	6.71999	0.0177952	0.0583099
TOP2	-0.817723	5.55887	20.3528	0.000234224	0.00290448
FAA2-1	0.817055	6.19479	10.7409	0.00439635	0.0217619
CAALFM_C110170WA	-0.817017	6.13501	4.64704	0.04558	0.112764
CAALFM_C500280CA	0.816281	5.05821	19.1481	0.000319151	0.00363651
CAALFM_C303540WA	-0.816129	4.75967	16.1791	0.000717262	0.00633267
CAALFM_C108900WA	-0.816094	1.83899	3.60201	0.0746553	0.160729
RPS9B	0.815658	8.80503	12.287	0.00234202	0.0138934
CAALFM_C109060CA	-0.815621	2.0641	5.28935	0.0342626	0.0912711
CAALFM_C113840WA	0.814942	7.16581	24.8947	7.93828e-05	0.00141832
SAC1	-0.814275	4.18238	6.65499	0.0193741	0.061419
CAALFM_C104110WA	-0.813441	3.26325	9.04341	0.00786637	0.0322724
RPL11	0.813397	8.17223	15.6786	0.000828205	0.00697563
RPP1B	0.813238	6.28414	18.0666	0.000528938	0.00508639
WSC4	0.813118	4.33613	17.8228	0.000562968	0.00531767
CAALFM_C205770WA	-0.812775	6.99163	15.0163	0.00119647	0.00886491
HAL9	0.81171	7.69779	8.66112	0.00829583	0.0335107
CAALFM_C209160WA	-0.81135	3.29786	9.74762	0.00614696	0.0272752
TMA19	0.811127	7.95475	22.1381	0.000150796	0.00217341
OYE22	-0.810647	7.57625	5.95543	0.0245458	0.0719223
PGA33	0.809822	4.5622	28.3809	5.37734e-05	0.00113149
CAALFM_C206950CA	0.80918	3.02491	27.5211	6.36471e-05	0.0012359
CAALFM_C113810WA	-0.809116	4.88666	12.734	0.00202784	0.0125048
RPL16A	0.809084	9.16826	18.9947	0.000332225	0.00374311
MIS11	-0.808782	6.62606	13.6273	0.00153087	0.010383
RPS22A	0.808409	7.39425	16.3819	0.000677081	0.00609373
CAALFM_C602650CA	0.80727	3.57697	11.4797	0.00345672	0.0181839
CAALFM_C301770CA	-0.807028	4.68318	15.5799	0.000852259	0.0070908
HGT16	0.806971	5.43345	11.8497	0.00307278	0.0168849
CAALFM_C204440WA	-0.806619	0.684597	6.05981	0.0246991	0.0723366
TEN1	-0.805943	1.65706	2.78098	0.113525	0.219167
ATG9	-0.805119	5.80038	16.2111	0.000710745	0.00629353
CAALFM_C403370CA	-0.804733	6.60683	7.47126	0.0131325	0.0468165
CAALFM_C102440CA	-0.804446	2.72394	22.0706	0.000201993	0.00261768
SEN15	-0.804271	1.69842	5.87559	0.0266725	0.0762307
CAALFM_C111320CA	-0.803963	9.32734	5.70076	0.0274043	0.0777208
GPM2	-0.803576	5.48088	7.09566	0.0162689	0.0544504
CAALFM_C701880CA	-0.802144	1.01807	5.72794	0.0283849	0.0796544
CAALFM_C400820WA	0.801819	4.25122	18.1399	0.000519154	0.0050182
CAALFM_CR10620CA	0.801101	5.67564	30.4256	3.64845e-05	0.00089565
CAALFM_CR00810WA	-0.800582	3.12905	11.0855	0.00392635	0.0201626
NPL3	0.8	4.67457	12.0182	0.00291407	0.0162045
PSF2	-0.79899	1.94397	6.95721	0.017179	0.0567835
CAALFM_C207640WA	-0.798956	7.50148	12.9961	0.00186554	0.0118839
CAALFM_CR08940WA	0.798348	3.96588	23.576	0.000144476	0.00210746
CAALFM_C701440WA	-0.798142	4.49217	1.82098	0.192921	0.325706
CAALFM_C208260WA	0.797628	6.79926	12.1202	0.00247285	0.0144261
RPL14	0.797463	7.78496	19.5602	0.000286765	0.00334966
MNN15	0.796878	6.7698	18.679	0.000453164	0.00462251
CAALFM_C405340WA	-0.796776	3.03229	13.3904	0.00164797	0.0109364
CAALFM_CR08260CA	-0.796545	-1.11012	0.762164	0.393458	0.539653
CAALFM_C602680WA	-0.796202	2.98476	8.7143	0.00885171	0.0350974
CAALFM_CR09100CA	-0.795745	6.8118	6.69823	0.0179556	0.0586816
RPS25B	0.793119	8.19387	21.0983	0.000194388	0.00255754
ZCF4	-0.793091	3.08799	3.04958	0.0986245	0.198813
NBP35	-0.792207	5.72607	7.61063	0.0133327	0.0472523
LEU1	0.791744	7.48236	20.579	0.000221255	0.0027731
NCE102	-0.79112	8.74827	6.16783	0.0224178	0.0675587
UBI3	0.790249	9.25894	14.2039	0.00128261	0.00927665
CAALFM_C401240CA	-0.790232	3.07142	14.8619	0.00124971	0.00916651
ALG6	-0.790219	3.42274	8.66378	0.00901496	0.0355826
MAK5	0.789983	6.2725	25.2968	7.25471e-05	0.00135328
DBP2	0.789738	7.65082	14.6263	0.00112914	0.00851295
ILV3	0.789171	7.00743	23.7306	0.000103533	0.00167624
HSM3	-0.78894	5.13742	6.86011	0.0178518	0.0584321
NRP1	0.788325	6.22354	22.6348	0.00013389	0.00199646
IFF11	-0.78828	1.17112	6.36664	0.0217705	0.0662663
TYE7	-0.788073	9.86781	5.73471	0.0270022	0.0768416
RCN1	-0.787827	1.17621	6.61562	0.0196829	0.0620183
CAALFM_C104150CA	-0.787646	1.53936	4.22	0.0554999	0.130009
TIM54	0.787181	5.35643	38.2962	9.48878e-06	0.000369695
CAALFM_C601450CA	-0.786539	6.48128	11.7342	0.00280797	0.0158332
CAALFM_C701430CA	-0.786087	10.5138	4.49094	0.0473517	0.115866
CAALFM_C208620WA	-0.785851	6.65596	5.77873	0.026491	0.0759995
RPL28	0.785654	8.6954	14.5965	0.00113928	0.00857784
CAALFM_C406660WA	0.785625	5.4109	21.5073	0.000175764	0.00240156
SFU1	0.785555	5.69746	14.092	0.00132707	0.00946181
CAALFM_CR01490CA	0.785423	3.16525	11.5467	0.00338337	0.0179544
CAALFM_C302530WA	-0.784894	2.17511	2.9643	0.103088	0.205117
CYB5	0.784624	5.68006	12.6571	0.00239047	0.0140977
SOD3	0.783609	6.76754	10.9663	0.00408221	0.0207064
CAALFM_C108730WA	-0.783466	4.62825	4.49213	0.0489207	0.118695
LCB2	0.782236	6.64114	30.8975	3.34426e-05	0.000852151
CAALFM_C204960CA	-0.782209	3.301	5.45817	0.031849	0.0869511
CAALFM_C702130WA	-0.78212	-0.335805	2.88008	0.107735	0.211512
SPC19	-0.782015	1.66576	3.24375	0.0892875	0.184218
CAALFM_C503640WA	0.781848	4.05344	14.0362	0.00158376	0.0106264
CAALFM_C600290WA	-0.781561	9.83739	7.79261	0.0115711	0.0429224
EST1	0.781418	4.44979	8.97655	0.00805607	0.032872
CAALFM_CR01850CA	0.780294	-0.333372	2.84525	0.109729	0.213966
GPI8	-0.779877	5.17401	12.1462	0.0027996	0.0158007
SIM1	0.779712	9.81598	14.8026	0.00107122	0.00823801
CAALFM_C306750WA	-0.779674	2.97661	4.48537	0.0490728	0.118873
GYP7	-0.779558	8.16985	11.1584	0.00340578	0.0180101
CAALFM_C304260WA	-0.778759	6.6635	9.61761	0.00583478	0.026335
CAALFM_C405650WA	0.778739	3.55904	9.66155	0.00633245	0.0277113
KTR4	-0.778709	4.44097	6.97287	0.0170732	0.0565581
PCL7	-0.778423	6.68023	27.2518	6.71442e-05	0.00128318
GPM1	0.77795	8.28834	7.13385	0.0150313	0.0514593
CAALFM_CR03510WA	-0.777787	2.09817	9.75068	0.00614049	0.0272665
RPL27A	0.777375	7.88519	22.2805	0.000192617	0.00254533
CAALFM_CR06620WA	-0.777032	4.1325	11.2238	0.00375393	0.0194092
CAALFM_CR04300WA	0.776453	7.00573	19.1286	0.000405267	0.00434709
TEF2	0.775639	10.9412	4.92303	0.0387643	0.100127
CAALFM_C600760WA	-0.775206	5.15389	3.98899	0.0619006	0.141063
FUN12	0.775145	7.6595	11.8429	0.00270869	0.0154465
CAK1	-0.774526	3.05597	6.93817	0.0173087	0.0570563
FET34	-0.773469	7.62788	5.4979	0.0313095	0.0856333
RPS1	0.77322	9.679	14.096	0.00132545	0.00946169
CAALFM_C106300WA	0.77306	2.44723	3.53875	0.0770212	0.164823
CAALFM_C201420CA	-0.772875	2.51592	18.6501	0.00045645	0.00464058
CAALFM_C101080WA	-0.772641	2.1479	7.32234	0.0148944	0.0510774
CAN3	-0.77193	5.44618	7.24684	0.015337	0.0521216
CAALFM_C400290CA	-0.771379	2.37723	3.92533	0.0638127	0.143847
CAALFM_C302820CA	-0.771138	5.32407	15.9822	0.000915823	0.00742001
CAALFM_C302980CA	-0.770818	3.36098	15.3272	0.00109679	0.00835244
RPP0	0.770808	9.413	10.7368	0.00393335	0.0201643
CAALFM_C306530WA	-0.77004	2.9611	8.42609	0.00983028	0.0379572
CAALFM_CR01180WA	-0.769838	2.93762	7.8043	0.0123879	0.0450395
CAALFM_C107640CA	-0.769763	4.46936	3.56698	0.0759549	0.162888
CAALFM_C405380CA	-0.769716	1.10424	3.00119	0.101129	0.202439
HGT7	-0.768934	11.2932	2.74955	0.113557	0.219167
RBT4	0.76875	6.99798	5.1696	0.0361019	0.0948323
APL2	-0.768256	5.08575	8.08735	0.0111404	0.0416574
CAALFM_C100090WA	-0.76739	0.752466	4.7887	0.0427537	0.107088
FGR6-4	-0.767388	3.66487	19.4209	0.000377169	0.00411884
RPL24A	0.767141	8.03936	20.1634	0.000245736	0.00299798
CAALFM_C205810WA	0.766602	5.44188	43.7701	4.15824e-06	0.000209069
CAALFM_C206750CA	-0.766503	2.55161	8.21779	0.0106138	0.0402433
DUR35	-0.766468	2.51665	3.52556	0.0775255	0.165668
CAALFM_C107260CA	-0.765499	4.04905	14.4939	0.00138769	0.00969507
CAALFM_C404970CA	0.764855	3.86167	13.6805	0.00175769	0.0113405
CAALFM_C110190WA	-0.764291	6.18455	12.5487	0.0024713	0.0144261
CAALFM_C503440WA	-0.764035	1.8029	2.84949	0.109484	0.21358
CAALFM_C600200CA	0.763901	5.69498	19.0496	0.000327479	0.00371738
CAALFM_C302620CA	-0.763876	3.67357	3.71517	0.070632	0.154267
CAALFM_C405870CA	-0.763654	3.08818	6.75884	0.0185858	0.0598316
CAALFM_CR08280WA	-0.76238	4.49899	16.0832	0.000891021	0.00731191
RPL4B	0.762236	9.70347	14.5885	0.00114201	0.00857784
RME1	-0.761783	6.7009	12.2986	0.00266986	0.0152683
CAALFM_C201900CA	-0.761753	4.00701	9.05662	0.00715973	0.0301517
CAALFM_CR06740WA	-0.760903	3.34615	17.2527	0.000652569	0.00591721
CAALFM_C704060WA	-0.760225	2.92826	7.43385	0.014267	0.0495162
CAALFM_C201310WA	-0.759471	5.71826	15.0848	0.00117364	0.00871787
DBP7	0.759398	6.55243	21.253	0.000243716	0.00299434
CAALFM_C503800WA	0.759264	6.75031	11.7479	0.00317341	0.017272
CAALFM_C106660WA	-0.758889	7.5451	6.04941	0.0248059	0.0725618
CAALFM_C302140CA	-0.757859	5.22397	5.36043	0.0332216	0.0894849
CAALFM_C702690CA	-0.757721	4.11659	18.8095	0.000438636	0.00452359
CAALFM_C304750WA	-0.757607	4.64376	9.52931	0.00662988	0.0285304
CAALFM_C405400CA	-0.757194	8.30755	7.68825	0.0120541	0.0442313
CDC53	-0.756326	5.95099	10.6011	0.00412221	0.0207797
RPP2A	0.756304	6.51621	16.0551	0.000743117	0.00648509
GPX3	-0.755208	3.50974	6.56985	0.020049	0.0628311
CAALFM_C113180WA	-0.754594	1.65357	5.62546	0.0296473	0.0822005
CAALFM_CR08480CA	0.753181	5.09982	16.7044	0.00075406	0.00653338
CAALFM_C110340WA	-0.752715	5.37584	18.393	0.000486916	0.00478906
CTA4	-0.752013	10.418	5.77233	0.0265646	0.0761204
OBPA	-0.751358	6.01459	11.3806	0.00315966	0.0172369
VPS8	-0.751348	5.43314	11.3473	0.00319532	0.0173374
CAALFM_C505200CA	-0.751085	4.32911	9.22287	0.00738167	0.0308498
CAALFM_C500260WA	0.750982	7.49729	18.1321	0.000520184	0.0050182
CAALFM_C301780CA	-0.750906	1.49632	4.28679	0.0537949	0.127317
CAALFM_C303680WA	-0.750182	6.03956	9.37855	0.00698835	0.0296691
RPS20	0.749981	7.58925	26.0742	6.11047e-05	0.00121649
CAALFM_CR06450WA	-0.749799	3.96612	9.09055	0.00707066	0.0299437
CAALFM_C505060CA	-0.749691	0.258281	4.91162	0.040464	0.10315
CAALFM_C207650CA	-0.749598	3.94572	14.6545	0.00132548	0.00946169
HTS1	0.748889	7.59241	14.7389	0.00109175	0.00832456
CPR6	-0.748629	6.17178	15.4676	0.00105484	0.0081669
DPP2	0.748148	2.84129	8.39208	0.00995362	0.038311
DNA2	-0.748039	5.16164	8.77136	0.00867131	0.0345422
CAALFM_C300230CA	0.746938	3.35336	3.00591	0.100881	0.202197
CDC27	-0.746816	3.77225	10.8008	0.00431031	0.0214238
MED22	-0.746238	0.775427	1.84628	0.191802	0.324633
CAALFM_C102220CA	-0.745916	4.18919	15.5814	0.00102219	0.0079961
CAALFM_CR00220WA	0.745565	5.36026	6.61512	0.0196869	0.0620183
MNT3	-0.745142	4.27653	5.24395	0.0349469	0.0924013
CAALFM_C203830WA	0.745066	4.64854	22.8264	0.000127939	0.00193156
ADK1	0.744424	7.27012	7.83778	0.0122324	0.0446354
UGA6	-0.744101	2.60022	4.90012	0.0406722	0.103506
CAALFM_C603330CA	-0.74382	5.08545	5.10734	0.0371031	0.0968304
CAALFM_C305940CA	-0.743792	2.60268	7.99433	0.0115339	0.0428559
ECM18	-0.743761	2.43416	4.38659	0.051359	0.122833
CAALFM_C112720CA	0.743644	0.00494866	4.40881	0.0508343	0.122056
COX7	-0.743217	4.3865	2.80269	0.112226	0.217639
CAALFM_C402450WA	-0.74266	2.90627	9.70045	0.00624785	0.0275062
LAS1	0.742416	5.15007	25.987	8.67239e-05	0.0014921
CAALFM_CR01440CA	-0.74231	5.80144	5.05505	0.0365056	0.0956845
CAALFM_C305540CA	-0.742194	2.15666	7.26866	0.0152076	0.0518276
CAALFM_C305020WA	-0.742173	4.0173	5.80772	0.0274446	0.0777208
CAALFM_C600630WA	-0.742033	1.46408	5.61202	0.0298176	0.0825246
IPP1	0.741229	6.88397	12.3962	0.00226055	0.0135297
MYO1	-0.741203	5.63812	10.1884	0.00528799	0.0245647
CAALFM_C207550WA	0.740927	6.25515	23.498	0.00014696	0.00213339
PGA6	-0.740763	1.42022	3.76722	0.0688671	0.152061
CAALFM_C406620CA	-0.740645	4.73203	10.7913	0.00432385	0.0214558
ATP7	-0.740639	5.43495	6.65581	0.018273	0.0593587
CAALFM_C400170WA	0.740425	6.51153	14.5451	0.00115697	0.00863654
CAALFM_C112540WA	-0.740406	1.83502	3.82879	0.0651066	0.145892
CAALFM_CR04560CA	-0.740315	2.89494	13.7846	0.00170466	0.0111653
CAALFM_C301210CA	-0.739917	4.10939	6.88125	0.0166554	0.0555794
CAALFM_C301720CA	-0.739432	7.52148	8.64975	0.00906092	0.0357406
ELA1	-0.739045	4.62602	10.2212	0.00522976	0.0244636
PRS1	0.738978	6.46347	19.8165	0.000268471	0.00318507
PMT2	-0.738668	6.53745	3.92127	0.0622166	0.141516
CAALFM_CR09560CA	-0.738642	2.51656	5.90298	0.0263681	0.0758864
CAALFM_CR09840CA	-0.738174	1.17681	4.70295	0.042893	0.10738
AAT21	0.736857	8.5135	13.4933	0.0018578	0.0118597
CAALFM_C105520WA	-0.736535	3.7203	10.9534	0.00409944	0.0207218
CAALFM_CR01300WA	0.736358	4.08291	10.2112	0.00524749	0.0244707
PDC12	0.736162	2.34665	11.0515	0.00397016	0.0203009
CAALFM_C501550CA	0.735822	8.29225	12.0467	0.00253308	0.0146948
RPL23A	0.735589	8.30663	10.3855	0.00444316	0.0219218
NTG1	0.735576	4.34602	26.8613	7.26054e-05	0.00135328
CAALFM_C403860CA	-0.735525	2.55282	16.8045	0.000734273	0.00641718
CAALFM_C503550WA	0.735452	7.10876	14.7532	0.0010871	0.00831295
CAALFM_C105540CA	-0.733915	7.18725	11.7002	0.00283978	0.0159381
MET10	0.733649	8.10087	17.7866	0.000568237	0.00535349
NDH51	0.733542	7.95435	15.3844	0.000902214	0.00734415
RPS18	0.733391	8.52588	14.2243	0.0012747	0.00927665
PRM9	-0.73338	0.943874	4.23639	0.0550758	0.129216
RPS16A	0.732694	8.23967	18.9275	0.000425949	0.00446581
SPT6	0.732164	7.43567	11.9899	0.00258073	0.0148997
CTR2	-0.731752	5.08476	7.45702	0.0141404	0.0493321
CAALFM_C704120WA	-0.731183	1.80571	6.15863	0.0237094	0.0701525
CAALFM_C703470WA	-0.73105	1.23119	5.5433	0.0307061	0.0842882
FEN1	-0.730424	6.09045	4.47862	0.0492253	0.119147
CAALFM_C407060WA	0.730415	7.5426	20.6621	0.000279881	0.00328195
CAALFM_C703210WA	-0.730069	3.79221	14.548	0.00136638	0.00963655
CAALFM_C404490CA	-0.72998	1.30698	3.58497	0.0752842	0.161794
LAT1	0.72979	6.96493	7.34566	0.0138059	0.0484732
CAALFM_C302390WA	-0.729696	4.40705	14.0736	0.00133454	0.00950385
RPS10	0.729671	8.07294	16.5578	0.000644265	0.00586835
SOU2	-0.729178	3.07014	4.39609	0.0511339	0.122502
GUA1	0.729026	8.55657	10.6037	0.00411842	0.0207779
RPS24	0.728892	7.90294	18.2829	0.000401181	0.00431859
RPL29	0.728859	6.36742	19.7494	0.000348178	0.00387228
ERG12	0.728361	4.48039	22.2534	0.000193799	0.00255536
BUB2	-0.727876	2.15028	8.12837	0.0109717	0.0411029
CAALFM_C503970WA	-0.727856	3.06783	4.44675	0.0499523	0.120665
TRS20	-0.727339	2.14528	9.82886	0.0059775	0.026779
RPL82	0.727179	7.49871	13.9226	0.00139765	0.00972397
COX4	0.727065	7.35142	12.8531	0.00195225	0.0122809
CAALFM_CR10180WA	-0.726611	2.31447	12.4592	0.00254037	0.0147088
CAALFM_C701030CA	0.726597	7.94959	13.7787	0.00146086	0.0100595
CAALFM_CR01560WA	-0.726588	1.41452	5.52081	0.0296515	0.0822005
WOR3	-0.726551	1.84267	3.57806	0.0755411	0.162173
CAALFM_C208650WA	0.726453	4.19412	19.2044	0.000397756	0.00429592
CAALFM_C101180CA	-0.726177	3.55938	6.78775	0.0183728	0.0594287
CAALFM_CR07250CA	0.726081	7.56357	4.17364	0.0550534	0.129216
NHP2	0.724416	6.2203	22.0602	0.000202469	0.00261822
PCL1	-0.724176	2.86889	8.17131	0.0107981	0.0407308
VCX1	0.723303	4.94602	11.9394	0.00298712	0.0165043
AFP99	-0.722149	4.35971	6.44564	0.021082	0.0648239
PDB1	0.721899	7.25569	7.70134	0.0119923	0.0441325
ATP19	0.720882	3.14593	17.7187	0.000578239	0.00541393
CAALFM_C104530CA	0.720283	4.57121	18.5697	0.000465745	0.0047034
CAALFM_C106400CA	0.719648	5.62062	26.5337	7.75703e-05	0.00140254
CAALFM_C502190CA	0.71878	4.73238	13.9433	0.00138878	0.00969507
CEF3	0.718428	12.1561	10.3501	0.00449849	0.0221044
CAALFM_C700590WA	0.717846	3.46837	6.67219	0.019241	0.061156
CAALFM_C206660WA	-0.717672	2.41185	4.76178	0.043275	0.107991
tD(GUC)5	0.716448	1.81023	3.73362	0.0700005	0.153371
CAALFM_C601490CA	0.716437	5.68122	2.86376	0.108664	0.212713
CAALFM_CR05010WA	-0.716342	3.50781	13.8818	0.0016568	0.0109829
CSR1	0.715981	4.40643	4.17095	0.0567922	0.13242
CAALFM_C110570CA	-0.715369	1.31788	5.43641	0.0321488	0.0875324
CAALFM_C700060CA	0.714517	4.641	9.94028	0.00575357	0.0261247
SHM2	-0.714448	7.04513	6.28228	0.0213581	0.0654581
CAALFM_C702630WA	-0.714278	4.3528	12.5711	0.00213655	0.0129936
CAALFM_C406410WA	-0.714199	3.69186	6.28182	0.0225385	0.0677839
CAALFM_C302770CA	-0.714126	4.04769	6.71479	0.0189156	0.0605888
CAALFM_C206790WA	-0.713743	2.26564	2.784	0.113344	0.219035
CAALFM_C208960CA	-0.71363	4.82244	8.13482	0.0101331	0.0388286
CDR4	-0.713232	11.6504	2.38462	0.138884	0.255319
COX17	-0.713106	3.06657	1.93579	0.181894	0.313129
PST1	0.712708	4.16653	5.55445	0.0305599	0.0840397
CTF18	-0.712328	3.54981	12.9473	0.00218829	0.0132283
CAALFM_C210170CA	-0.712305	6.82061	14.1453	0.00130568	0.00937571
CAALFM_C202910WA	-0.71185	2.32325	3.41371	0.0819618	0.172643
CAALFM_C110310WA	-0.711811	5.46587	1.49437	0.238058	0.377133
CAALFM_CR02880WA	-0.711588	2.38246	3.05014	0.0967361	0.196168
HGT20	-0.711319	2.92978	7.37805	0.0145771	0.0502405
TEF1	0.710929	12.0665	1.83678	0.191086	0.324148
ADH5	0.710632	9.26901	10.2447	0.00466787	0.0226802
CAALFM_CR08880CA	0.709982	5.76369	14.5608	0.00115153	0.00862919
CAALFM_C503930CA	-0.708725	2.8642	5.01551	0.0386382	0.0999692
CAALFM_CR04170WA	0.708707	7.10879	15.7924	0.000964556	0.00773566
PHO86	0.70851	6.14843	9.32192	0.00712861	0.0300836
LEM3	0.707762	6.37923	22.5439	0.000181529	0.00241999
CAALFM_C407210WA	-0.707703	2.91575	9.97836	0.00567921	0.0259039
CAALFM_C702670WA	-0.707418	3.4261	8.15879	0.0108484	0.0408231
CAALFM_C207140WA	-0.707131	2.31187	9.57689	0.00652109	0.0283003
CAALFM_C602180WA	-0.706944	2.87143	7.71551	0.0128113	0.0460795
QCR2	0.706921	7.33437	17.4194	0.000624822	0.00575232
EAP1	0.706479	5.64116	10.0751	0.00549515	0.0252551
SCW4	0.706456	5.23185	1.58559	0.223076	0.361168
GLX3	-0.706079	8.28064	8.49656	0.00958018	0.0373015
SDH2	0.705889	7.66965	18.0269	0.000534311	0.0051299
ERG10	0.705643	6.16176	6.25866	0.0215721	0.0659264
ERG9	-0.705453	4.58424	5.4211	0.0309863	0.08498
TIP41	-0.704729	4.10081	25.1884	0.00010235	0.00166854
CAALFM_C303510CA	-0.704275	5.14773	8.01632	0.0114395	0.0426045
FRE7	0.704213	7.71798	8.24671	0.00970729	0.0376266
CCT8	0.703841	6.31082	10.2228	0.00470385	0.0227617
GUT1	0.703673	6.54632	6.20339	0.0232762	0.069312
CAALFM_C406140CA	-0.702837	3.41208	16.0932	0.000888606	0.00731191
EGD1	0.701328	6.35844	16.0123	0.000752274	0.00653338
CAALFM_CR10760CA	0.700307	3.59861	17.8246	0.000453908	0.00462251
CAALFM_C604410CA	0.700138	5.37793	16.2905	0.000842439	0.00704638
RIO2	0.699909	5.23161	13.6937	0.00149971	0.0102336
ILV2	0.699341	7.79458	16.0696	0.000894305	0.00731803
JEN1	-0.698907	6.15334	1.52887	0.232931	0.372036
ECM14	-0.69879	6.84103	5.09611	0.037287	0.0971006
CAALFM_C112700WA	-0.698337	3.40999	10.8691	0.00421442	0.0210686
CAALFM_C207390CA	-0.697418	5.07082	13.221	0.00173776	0.0112479
SST2	0.697208	3.96303	20.4401	0.000294994	0.0034259
CAALFM_CR03130WA	-0.697048	3.18079	16.3791	0.000822586	0.00694769
SUC1	-0.697004	4.54687	21.4461	0.000178423	0.00240964
RPS21B	0.696091	7.13288	15.6889	0.000992341	0.00785419
DAD1	-0.695596	0.50136	2.78496	0.113286	0.219035
CAALFM_C500130CA	0.69541	4.39663	16.2085	0.000861284	0.00714464
FRP6	-0.695175	8.00226	3.21108	0.0889419	0.183631
CAALFM_C302920WA	-0.694892	6.85386	6.62415	0.0196155	0.0618904
SAM37	0.694881	0.748272	3.60845	0.0744192	0.160392
CAALFM_C505340WA	0.694682	6.14126	21.9787	0.00020626	0.00265022
CAALFM_C206600WA	-0.693921	8.22167	9.30766	0.00652926	0.0283003
CAALFM_C209110CA	-0.693902	1.10538	6.55412	0.0201765	0.0630673
ADH3	-0.693162	3.5858	5.98934	0.0254336	0.0739497
CAC2	-0.692532	3.33074	26.7624	7.40646e-05	0.00136549
CAALFM_C205710CA	0.691501	7.6563	14.8893	0.00104393	0.00810321
UTP13	0.691441	6.09705	14.5072	0.00138244	0.00968508
MED15	0.690895	7.21798	17.4841	0.000498065	0.00487491
CAALFM_C201240CA	-0.690753	4.47809	17.9808	0.000540645	0.00518247
CAALFM_C105690CA	-0.690612	2.66838	3.51667	0.0778678	0.166046
CAALFM_C100860WA	-0.689815	3.73038	3.90892	0.0643165	0.144643
CAALFM_C503450WA	-0.689777	2.43878	3.15883	0.091389	0.187375
PGA4	0.689703	7.12706	8.43966	0.00978155	0.0378174
HPD1	0.689679	5.23344	4.9852	0.039161	0.10085
THI6	-0.689463	3.78387	6.64896	0.0183249	0.0594009
RPL39	0.689135	7.52554	9.8706	0.00532876	0.0247161
SAC6	-0.689068	8.98696	6.83171	0.0169966	0.0563971
CAALFM_C200180CA	-0.689042	6.69492	3.42244	0.079794	0.169139
RFA2	-0.688751	3.89721	8.6556	0.00831303	0.0335578
tL(UAA)4	-0.688736	-0.567438	0.384551	0.543322	0.676241
CAALFM_C404660CA	-0.688657	8.19848	7.27186	0.0142197	0.0494659
CAALFM_C108470WA	0.68816	3.1575	11.5944	0.00333221	0.0177691
CAALFM_C501940WA	0.687501	4.7047	23.1273	0.000159431	0.00223908
PGA54	-0.687296	3.76275	4.134	0.0577886	0.134484
PTR22	0.687264	9.10624	9.84077	0.00538579	0.0249041
SSN8	-0.686686	4.62966	3.95808	0.0628204	0.14246
IDP1	0.686365	4.67982	11.4592	0.00347963	0.0182885
RPL17B	0.686263	8.75811	9.61805	0.00583385	0.026335
CAALFM_C304080WA	0.686259	6.71786	14.1243	0.00154373	0.0104217
NPL4	-0.68579	5.628	6.47067	0.0208691	0.0643987
CAALFM_C302690CA	-0.685651	5.53876	8.5099	0.00953364	0.0371923
ALD6	0.685416	8.6314	2.32976	0.143253	0.261757
WAR1	0.685369	6.75205	6.84354	0.0169144	0.0561551
CAT1	0.6851	12.0753	4.88366	0.0394684	0.101425
CAALFM_C703280CA	-0.685085	8.00579	8.61262	0.00918378	0.0361073
RNY11	-0.685036	1.92139	7.62512	0.0132593	0.0471083
POL2	-0.684836	6.56967	17.0343	0.000691037	0.00616422
RFA1	-0.684098	5.53934	9.30098	0.00718129	0.0302004
CAALFM_C401460CA	-0.684017	3.03664	9.82088	0.00599391	0.0268128
RPL30	0.683877	7.44152	15.5791	0.000852446	0.0070908
CAALFM_C306820CA	-0.683299	5.56039	15.638	0.00100634	0.00791313
BRO1	-0.683144	5.672	6.53689	0.0203174	0.0633764
CAALFM_C206030WA	-0.683112	4.34886	11.5531	0.00337649	0.0179337
RRP8	-0.682767	5.46215	9.56362	0.00594956	0.0267108
CYC1	0.682749	7.55216	9.82205	0.0059915	0.0268128
SSK2	0.682441	7.42838	18.7639	0.000353028	0.00391181
ARP1	-0.682346	1.31435	6.8192	0.0181443	0.0590374
CAALFM_C112830CA	-0.682333	6.27534	7.53538	0.0128029	0.0460768
ANB1	0.681757	8.32965	12.8698	0.00194187	0.0122411
CAALFM_C209250WA	-0.681414	3.41906	16.1642	0.000871677	0.00721922
DFG10	-0.681338	3.0432	9.21808	0.00739415	0.0308805
BIO2	0.681286	0.76954	4.30743	0.0532804	0.126627
HHT1	-0.680921	7.86431	6.30473	0.0211568	0.0649725
SOD2	0.680822	6.87788	8.49088	0.00960007	0.0373549
CAALFM_C400080CA	0.680698	6.91744	7.52178	0.0128721	0.0462705
MED11	-0.680441	2.51859	4.97266	0.0393797	0.10124
CAALFM_C700780WA	-0.680213	5.69911	4.9289	0.0401535	0.102705
KRE30	0.68018	8.53245	10.2043	0.00473461	0.0228556
CAALFM_C208740WA	-0.679555	2.91161	5.22124	0.033872	0.0905278
CAALFM_CR08610WA	0.67898	3.83871	8.50032	0.00956704	0.0372744
ATP1	0.678502	9.75612	7.18995	0.0146953	0.0505958
CAALFM_C503470CA	0.677901	5.14117	24.0597	0.000130088	0.00195186
CAALFM_C204320WA	-0.67774	2.2471	6.51515	0.0204966	0.0636587
CAALFM_C114450CA	0.677577	6.2382	12.2114	0.00274322	0.0155552
CAALFM_C300610WA	-0.677225	2.92266	6.80391	0.018255	0.0593335
CAALFM_C602430WA	0.676994	6.43314	7.2777	0.0141864	0.0494071
CAALFM_C602990WA	-0.676867	3.90996	12.3355	0.00263942	0.0151516
EMC9	0.676707	7.13994	26.2493	8.21898e-05	0.00144741
DOS2	-0.676582	3.42054	9.39212	0.00633127	0.0277113
CAALFM_C305150WA	0.676561	5.14669	17.0489	0.000688379	0.00614958
SYN8	-0.676401	3.79221	14.5451	0.00136753	0.00963655
RNR21	-0.676145	7.49889	14.6799	0.00111117	0.00840898
CAALFM_C302260CA	-0.675969	6.23763	22.7885	0.000129091	0.00194409
CAALFM_C105180CA	0.675351	3.78071	15.7636	0.000972208	0.00778669
PNP1	-0.67527	3.62821	3.7239	0.0703326	0.153835
CAALFM_C205480CA	0.675031	1.72908	8.36218	0.0100635	0.0385863
CAALFM_C405970WA	0.674921	4.76758	8.92073	0.00821843	0.0333094
CUP1	-0.674862	6.17421	6.36178	0.0218137	0.0663642
RPL32	0.673998	8.13237	14.1151	0.00131776	0.00942884
RSM22	0.673989	5.2157	12.7841	0.00229951	0.0136815
CAALFM_C701350CA	-0.673847	2.73158	6.20723	0.0220465	0.0668032
tD(GUC)3	0.67381	1.78017	3.12988	0.0946296	0.193063
CAALFM_C303130CA	-0.673793	2.384	5.02116	0.0370709	0.0967882
SET6	-0.673377	4.59061	10.4349	0.00486727	0.0232543
SPC3	-0.672302	2.74644	4.67466	0.0450126	0.111543
CAALFM_C304510WA	-0.672214	3.69849	11.6216	0.00330346	0.017733
CAALFM_C703310WA	-0.672163	5.0536	1.79442	0.197853	0.331688
ARO4	0.672116	6.99861	7.55469	0.0136206	0.0480461
CAALFM_C104800CA	-0.671958	0.544906	5.05738	0.0379294	0.0983916
CAALFM_C106650WA	-0.671725	4.82981	15.6462	0.00100408	0.00790569
PCD1	-0.671706	5.50925	5.52039	0.031009	0.0850037
URK1	-0.671534	4.93521	9.52387	0.00664245	0.0285304
CAALFM_C114310WA	-0.671307	3.00397	9.1657	0.00753232	0.0311987
TIF34	0.671226	6.4665	18.5505	0.000467998	0.0047104
CAALFM_CR00290WA	0.670963	7.84548	5.76527	0.0266461	0.0762274
CAALFM_C602150CA	-0.670717	2.59774	6.63932	0.0194964	0.0617403
CCC1	0.670583	6.27578	5.25916	0.034716	0.0920324
CAALFM_C105720WA	0.669584	9.48513	17.0698	0.000558327	0.00528485
CAALFM_C307450CA	-0.669007	2.74635	6.37483	0.021698	0.0660788
CAALFM_C102290CA	-0.668799	2.83359	10.6086	0.00411141	0.0207599
CAALFM_C402740WA	-0.668422	9.32192	5.26729	0.033181	0.0894155
NGS1	0.667617	5.64737	16.3734	0.000823849	0.00694864
CAALFM_C301680CA	-0.667417	4.43951	8.21194	0.0106368	0.0402732
CAALFM_CR10420WA	0.667191	7.0773	13.7465	0.00147543	0.0101367
ATG15	-0.666834	7.12643	19.8194	0.000268273	0.00318507
RAD50	-0.666329	5.08241	3.48332	0.079167	0.168046
CAALFM_C403960WA	0.666181	5.57824	2.27355	0.149779	0.271219
CAALFM_C109540WA	0.665346	6.39812	13.5128	0.00158624	0.0106264
CAALFM_C107590CA	-0.665219	4.40999	13.0032	0.00215158	0.0130558
CAALFM_C206890CA	-0.66505	4.29395	2.34646	0.143787	0.262602
POL32	-0.664565	4.55476	21.0542	0.000196523	0.00256155
CAALFM_C202570WA	-0.664409	5.56542	6.01751	0.0239011	0.0706117
CAALFM_C301900CA	0.664149	5.2098	9.53743	0.00661117	0.0284974
SPR28	-0.66408	1.65845	5.69327	0.0274939	0.0777382
CAALFM_C405160CA	-0.66372	4.08007	7.44338	0.0132787	0.047143
CAALFM_C403000CA	0.66358	5.4003	20.4644	0.000293295	0.00341273
CAALFM_CR03220CA	-0.663339	3.32152	16.16	0.000872666	0.00721922
CAALFM_CR08500WA	0.663282	6.02641	14.8164	0.00126593	0.00924421
CAALFM_C210140WA	-0.662469	3.97955	4.63865	0.0457541	0.112918
ARG8	-0.662456	5.215	4.33333	0.0526428	0.125458
tP(UGG)1	0.66244	-0.677942	0.448343	0.512028	0.650155
CAALFM_C306410CA	-0.662403	3.61494	4.95643	0.0396646	0.1018
DEM1	-0.661961	4.01599	24.3261	0.000122854	0.00187826
CAALFM_C603370WA	-0.661944	8.96835	5.15294	0.0349274	0.09239
CAALFM_C502330WA	0.661418	4.58242	8.95587	0.0081158	0.0329821
CAALFM_C210820CA	0.66026	6.65332	14.1508	0.00153191	0.010383
CAALFM_C113590WA	-0.660045	0.515802	2.11749	0.163667	0.289455
CAALFM_C700790WA	-0.660008	3.21248	7.92173	0.0118521	0.0438034
CTN3	-0.659657	10.1838	3.78415	0.0665566	0.148425
CAALFM_C405790WA	-0.659103	4.38916	10.5679	0.00465591	0.0226568
CYT2	0.659058	4.39613	19.8999	0.000335727	0.0037685
CAALFM_C604650WA	0.658823	4.00569	4.28323	0.0538843	0.127411
CAALFM_C109910CA	0.657923	4.6605	14.2822	0.00125252	0.00916841
CAALFM_CR06630WA	-0.657379	4.17913	3.302	0.0866929	0.179787
CAALFM_C504940WA	-0.656953	2.6388	3.07345	0.0974166	0.196907
CAALFM_CR10820WA	0.65667	1.05924	3.03537	0.0993522	0.199996
CAALFM_C304970CA	-0.656308	6.42683	9.038	0.00788153	0.0323126
HYS2	-0.656032	4.39672	24.9197	0.000108296	0.00173936
ANT1	0.655496	6.89737	2.63363	0.12284	0.232404
SUR7	-0.6553	8.55182	9.17238	0.00686094	0.0292427
CAALFM_C204180CA	0.654997	4.06192	13.3225	0.00195473	0.0122837
CAALFM_C500800CA	0.654645	7.29683	13.2783	0.00198074	0.0123201
CAT2	0.654179	7.93001	4.07052	0.0595483	0.137519
TPS1	0.654054	6.42057	9.01266	0.00795298	0.0325614
RNR3	0.654048	6.79754	9.45264	0.00619355	0.0274214
CAALFM_CR01430WA	-0.653966	3.04388	11.8286	0.00309333	0.0169824
PGA45	0.653872	5.75533	1.69041	0.210731	0.346854
CAALFM_CR05500CA	-0.65318	3.86127	8.75578	0.00872014	0.034691
CAALFM_C502850WA	0.652868	3.62652	14.5453	0.00136744	0.00963655
CDC68	-0.652786	6.11436	8.83218	0.00848357	0.0339962
CAALFM_C301170WA	-0.652482	5.13677	10.2495	0.00518008	0.0243346
CAALFM_C700160CA	0.652112	5.9421	15.9902	0.000757062	0.00654062
CAALFM_C604290WA	0.652066	6.98336	16.0347	0.000902825	0.00734415
MCA1	-0.650645	7.36163	5.1802	0.0359347	0.0944754
FAD3	0.650011	5.702	7.93849	0.0109318	0.0410322
PGA62	-0.649912	10.4576	6.00048	0.024076	0.0709352
CCT7	-0.649359	5.822	10.8784	0.0042016	0.0210686
CAALFM_CR03530WA	0.64906	7.3289	14.3796	0.00143399	0.00990833
CAALFM_C103240WA	0.64885	3.69243	12.614	0.00242226	0.0142296
CAALFM_C604070CA	-0.648697	0.537658	5.84675	0.0269975	0.0768416
RIP1	0.648525	7.76732	11.0561	0.00352606	0.0185164
CAALFM_C600340CA	0.648399	5.64976	25.4414	9.70827e-05	0.00161379
CAALFM_C503110CA	-0.648212	2.40866	7.72128	0.0127833	0.0460611
CAALFM_C603600CA	0.647964	8.50547	0.958256	0.339821	0.488847
CAALFM_C101010WA	0.647932	5.62865	12.7318	0.00202925	0.0125048
CAALFM_C403710CA	-0.647174	4.94621	10.2315	0.00468958	0.022729
CAALFM_C200490WA	-0.647113	5.60501	8.70118	0.00817201	0.03316
SEC13	-0.646855	4.99648	3.48422	0.0791316	0.168046
CAALFM_C200830CA	0.646447	4.95579	20.7572	0.000273679	0.00321547
PHO13	-0.646444	1.4622	2.10645	0.164708	0.290924
IFD6	-0.646223	6.15348	0.883217	0.360358	0.508577
CAALFM_C601370WA	-0.646204	3.94749	2.72212	0.117141	0.224362
ASG1	-0.645596	6.52436	5.16217	0.0347825	0.0920875
DAO1	0.64474	5.19295	11.9075	0.00301725	0.0166251
RPO41	0.643973	8.93899	11.2031	0.00335457	0.0178487
RNH1	0.64367	4.98248	14.077	0.00156506	0.0105367
CAALFM_C501070CA	0.643648	5.19115	3.54687	0.0767126	0.164279
LYS142	0.6435	5.57637	3.6986	0.0712053	0.155182
COG4	-0.642806	3.67415	10.4686	0.00481262	0.0230662
CAALFM_C700580CA	0.64279	2.57233	7.03258	0.0166766	0.0555794
CDR2	-0.642768	6.31165	2.76666	0.114393	0.220497
LEU42	0.642305	7.95355	4.08367	0.0574924	0.133949
CAALFM_C205130WA	0.642214	4.24515	10.4898	0.00477872	0.022953
ARC19	-0.642014	1.98298	2.37127	0.141815	0.2596
RPL25	0.641989	8.41518	11.2296	0.00332469	0.0177691
CAALFM_C701960WA	0.641983	5.27368	11.2215	0.00333373	0.0177691
CAALFM_C103120WA	-0.64194	6.90003	12.8771	0.00193735	0.0122381
GPI19	-0.64182	1.49326	5.25974	0.0332933	0.0895542
CAALFM_C105630CA	0.641775	9.29018	12.8487	0.00225472	0.0135082
RPL5	0.64175	9.27924	9.88649	0.00529865	0.0245953
CAALFM_C402330CA	-0.641729	3.01543	8.16661	0.010817	0.040759
CAALFM_C702420CA	0.641721	5.47177	15.9232	0.000930656	0.00751368
CAALFM_C103540CA	-0.640836	2.82238	11.228	0.00374879	0.0194092
CAALFM_C603210CA	-0.640166	3.64936	8.62522	0.00914189	0.0359895
ERG20	-0.64001	4.21422	6.7815	0.0184186	0.0595131
CAALFM_CR10750CA	0.639999	4.57912	15.13	0.00115887	0.00864003
MNR2	0.639464	6.94112	13.3407	0.00194413	0.0122426
CDA2	-0.639407	1.6943	6.25354	0.0228014	0.0684382
CAALFM_C702560WA	-0.639394	4.72738	8.85335	0.00841931	0.0338961
CAALFM_C307690CA	-0.639297	4.60747	11.8974	0.00302685	0.0166628
CAALFM_C601980CA	0.639292	4.07486	14.566	0.00135938	0.00962406
CAALFM_C703830CA	-0.639149	2.13874	1.93805	0.181653	0.312893
RMP1	-0.639126	2.15112	4.93663	0.0400156	0.102483
CAALFM_C201050WA	0.63881	1.93308	5.60728	0.029878	0.082616
CAALFM_C501290CA	0.638605	4.57772	15.3549	0.00108837	0.00831295
CAALFM_C400940WA	-0.638397	1.49036	6.57446	0.0200117	0.0628122
CAALFM_C702100WA	0.638164	5.88581	9.80413	0.00602853	0.0269277
CAALFM_CR04240CA	0.638042	7.51656	8.34136	0.00936266	0.0366436
CAALFM_C112980WA	-0.637583	1.0761	1.50089	0.237077	0.376373
YKE2	-0.637265	4.63152	5.29344	0.0342016	0.0911488
TRS33	-0.636688	4.09077	11.7033	0.00321872	0.0174018
ADH2	0.636613	8.48148	2.48513	0.131288	0.24448
CYS3	0.636602	9.74768	8.96379	0.00740987	0.0309034
CAALFM_C209880CA	-0.636583	9.16712	3.95233	0.0612795	0.140224
CAALFM_C107850CA	-0.636199	1.69929	5.63341	0.0295472	0.0820533
CAALFM_C205350CA	-0.635999	2.49564	12.8609	0.00224637	0.0134716
CAALFM_CR02690WA	-0.635974	2.45289	10.6101	0.00459102	0.0224433
CAALFM_C108050WA	0.635243	5.64269	17.2739	0.00064896	0.00589333
TOM40	0.635164	7.22725	13.5986	0.00154453	0.0104217
COQ5	0.634502	4.61502	10.6545	0.00404673	0.0205882
CAALFM_C104790WA	0.634481	1.33295	3.9654	0.0626012	0.142124
YHM2	0.634431	6.08153	6.82147	0.0181279	0.0590159
GEA2	-0.634216	5.81911	7.45188	0.0141683	0.0493986
CAALFM_C502110WA	0.633947	6.92106	4.05526	0.0599805	0.138253
CAALFM_C111860WA	0.633457	6.91263	7.60718	0.0124449	0.0451651
CAALFM_C307120WA	-0.632902	3.24296	3.63839	0.0715591	0.155784
RPL10	0.632882	9.54364	9.45336	0.00619193	0.0274214
APL4	-0.632799	4.79581	10.9228	0.00414077	0.0208211
CAALFM_C109110WA	-0.632456	3.53809	3.06944	0.097618	0.197162
URE2	-0.632395	4.90779	7.43789	0.0142448	0.0494962
MED5	-0.63228	3.91208	9.57527	0.00592458	0.0266421
IFF4	-0.63199	6.19072	10.1826	0.00477093	0.022953
SEC9	-0.631724	6.15726	15.3026	0.00110434	0.00838384
RBK1	0.63166	4.26639	17.9296	0.000547766	0.00520119
IFF8	-0.631315	2.38164	3.44681	0.0788116	0.167645
MCR1	0.631094	6.53521	8.37598	0.00924004	0.0361872
CAALFM_C503940CA	0.631074	3.90481	5.73449	0.0270049	0.0768416
ZCF10	0.630839	4.65464	16.0317	0.000903577	0.00734415
CAALFM_C500840WA	-0.630837	2.7447	14.7658	0.0012842	0.00927665
CAALFM_C200940WA	-0.630768	7.79257	9.09248	0.00773035	0.0318442
PGA19	-0.630687	0.92363	3.94558	0.0614819	0.14048
ALS1	0.630673	14.2555	3.60084	0.0729171	0.158164
CAALFM_C202180WA	0.629753	4.34147	6.24287	0.0229014	0.0686033
RHO3	0.629112	3.72903	3.52342	0.0776077	0.165785
ILV6	0.628704	5.14564	9.6501	0.00635761	0.0277611
CAALFM_C114180WA	-0.628577	4.96913	2.31173	0.144725	0.263888
TKL1	0.628288	8.75406	4.21197	0.0540505	0.127654
VMA22	-0.627672	0.306208	5.10546	0.0371338	0.0968636
PGK1	0.626923	9.19555	3.51897	0.0759837	0.162892
CAALFM_C107690CA	-0.626801	5.73672	3.6635	0.0706669	0.154287
ARX1	0.626605	6.96012	9.71122	0.00564153	0.0257515
TFC4	-0.626423	4.36027	10.0468	0.00554837	0.02543
SWR1	0.626362	7.49749	15.3522	0.000910755	0.00739254
CAALFM_C501540WA	0.626341	7.04563	9.72321	0.0056173	0.0256603
NOP5	0.625862	8.02073	7.6407	0.0122816	0.0447879
EHT1	-0.625809	4.82937	4.35636	0.0520831	0.12428
CAALFM_C200730CA	0.62548	5.48224	8.68761	0.00893753	0.0353926
FMP27	0.625327	8.30594	13.7519	0.00172115	0.0111969
MED21	-0.625302	2.13677	4.44445	0.0500053	0.120679
PGA14	0.62527	8.08005	7.91179	0.0110458	0.0413551
GST3	-0.625253	5.81653	3.30016	0.0867736	0.179892
HNT1	0.624968	5.19447	4.91338	0.0404323	0.10315
CAALFM_C210470CA	0.62432	4.88131	11.1653	0.00339775	0.0179991
CAALFM_C111720WA	-0.624301	1.39383	4.9176	0.0403563	0.103093
GLG2	-0.624119	3.57198	6.7047	0.0189921	0.0607627
YMC2	0.624052	3.08979	3.62836	0.0736951	0.159286
CAALFM_C302630CA	-0.623912	8.51179	5.14412	0.0350663	0.0926385
VPS51	-0.623366	2.41954	8.20202	0.0106759	0.0403454
SAP9	-0.622767	11.429	3.59869	0.072996	0.158228
CAALFM_CR10430CA	-0.622642	1.86823	5.80693	0.0261691	0.0755619
CAALFM_C210810WA	0.622498	4.4488	20.7774	0.000272381	0.00320645
CAALFM_CR01070WA	-0.622351	1.55949	3.65552	0.0727203	0.1578
CAALFM_C302840WA	-0.622069	2.52444	5.98476	0.0254823	0.0740556
BUD23	0.621897	4.34022	22.5955	0.000179443	0.00241349
CAALFM_CR02570CA	-0.621605	5.25456	2.49498	0.13057	0.243368
NAT5	0.621562	3.63248	11.6701	0.00325287	0.0175081
RPL38	0.621172	7.3366	13.3619	0.00193185	0.0122162
CAALFM_CR04730WA	0.619528	4.82502	5.43068	0.0322283	0.0876302
CAALFM_C500580WA	-0.619504	5.15543	3.97469	0.0623243	0.141671
CAALFM_C400230WA	0.619481	3.96374	16.3627	0.000680778	0.00611788
CAALFM_CR00990WA	-0.619297	2.84027	5.8767	0.0266601	0.0762307
MSH6	-0.619118	4.1107	10.7638	0.00436313	0.0216152
CAALFM_C104340CA	-0.618134	2.38926	7.2187	0.0155058	0.0524884
USO6	-0.617961	5.56253	6.61847	0.0185577	0.0598025
CAR2	0.617831	9.14646	6.00661	0.0240129	0.0708076
CAALFM_C104160CA	-0.617777	1.48543	3.14724	0.0919424	0.188281
PEX8	-0.61719	4.37063	7.19301	0.0156617	0.0529865
MET1	0.616905	6.77348	9.37744	0.00699108	0.0296691
CAALFM_C112440WA	-0.616773	2.82939	15.532	0.00103621	0.00806401
RPS6A	0.616691	9.15856	9.50278	0.00608196	0.0270862
CAALFM_C208380CA	-0.616652	4.0975	12.1662	0.00278214	0.0157316
ULP2	-0.616624	4.43584	9.04823	0.00785289	0.032239
CAALFM_C703760WA	-0.616377	3.85387	8.13574	0.0109417	0.0410414
CAALFM_C205160CA	0.614991	6.80241	13.6401	0.00177877	0.011452
RPS13	0.61489	8.65946	14.0239	0.00158944	0.0106264
FUN31	-0.614718	8.41648	6.19131	0.0233922	0.0695548
SKI8	0.614462	2.57558	5.31695	0.033854	0.0905278
CAALFM_C111900CA	-0.614447	3.40859	16.0744	0.000893148	0.00731803
CAALFM_C404460CA	0.614049	7.88318	12.8442	0.00195777	0.01229
AOX2	-0.612978	12.0897	2.03156	0.170143	0.298257
CCS1	0.612896	6.40133	7.14176	0.0149834	0.0513244
OPI1	0.612815	6.45879	4.37312	0.0500574	0.120725
CAALFM_C601560WA	-0.612581	3.73419	7.38862	0.0145178	0.0501361
CAALFM_C201030WA	0.61233	4.60988	15.8779	0.000942242	0.00758908
CAALFM_C104010CA	0.612203	5.82835	1.49862	0.235718	0.374901
CAALFM_C204390WA	-0.611606	0.955495	3.22933	0.0899442	0.185232
CAALFM_C209790WA	0.611531	4.78506	23.9028	0.000134572	0.00199649
HXK1	0.611331	2.552	3.18516	0.090146	0.185483
ARG11	-0.611323	2.66724	4.5482	0.04768	0.116527
CAALFM_C109750WA	0.611095	4.60822	9.49915	0.0066999	0.0286955
CAALFM_C403050CA	0.610727	7.25884	4.29186	0.0536679	0.127248
ACS1	0.610674	11.2871	2.9193	0.103669	0.205737
ATO2	0.610591	8.17931	4.72617	0.0424346	0.106598
HEM1	0.610509	8.23676	11.4303	0.00310742	0.0170133
CAALFM_C602740WA	0.61046	4.69597	13.0534	0.00211921	0.0129011
MCI4	0.610227	4.91678	22.3907	0.000187889	0.00249377
SSP96	-0.610104	1.42399	6.12112	0.0240797	0.0709352
CAALFM_C305450CA	-0.610017	7.15073	5.53449	0.030822	0.0845681
PHB2	-0.609828	5.71728	9.4914	0.00671803	0.0287528
CAALFM_C114470WA	0.609695	2.842	2.41266	0.138597	0.254868
DUG3	-0.609544	5.52898	9.62909	0.00581067	0.0262851
CAALFM_C209820WA	0.609328	6.02293	8.24729	0.0104986	0.0399001
CAALFM_C701170CA	-0.609156	5.27416	6.49223	0.0206875	0.0640021
CAALFM_C112660WA	-0.609097	2.79955	1.87703	0.188324	0.320634
CAALFM_CR01790CA	0.60908	5.60744	16.8058	0.000734031	0.00641718
CAALFM_C700330CA	-0.609065	4.09437	6.16569	0.0224382	0.0675833
CAALFM_C200770WA	-0.609049	5.92961	5.35453	0.0333066	0.0895542
CAALFM_C601480WA	-0.608974	1.5358	4.79582	0.0426171	0.106879
CAALFM_C300210CA	-0.608772	3.4036	6.84529	0.0179572	0.0586816
CRK1	0.608676	5.27375	24.5675	0.000116686	0.00181837
EFT2	0.608249	11.1815	3.71992	0.0687094	0.151824
CAALFM_C105440CA	-0.608203	7.80849	6.60082	0.0198005	0.0623063
CAALFM_C701600WA	0.608084	4.94643	15.6956	0.000990516	0.00785419
DPB4	-0.607978	2.14113	5.30968	0.0339611	0.0907081
CAALFM_C111200WA	0.607653	11.0545	1.35189	0.259219	0.402527
GUT2	-0.60697	9.26972	4.18963	0.0546324	0.128626
PTH2	-0.606883	3.98455	6.78789	0.0183718	0.0594287
CAALFM_CR08670CA	0.606567	4.27388	9.352	0.00705372	0.0298929
CAALFM_C304190WA	-0.606487	3.79858	3.36401	0.0822085	0.172982
CAALFM_C110420CA	0.606328	5.54967	18.4011	0.000485931	0.00478717
TLO5	0.606254	1.45523	3.51967	0.0777521	0.165966
CAALFM_CR03940WA	0.606243	5.05658	11.4182	0.0031201	0.0170673
TIF3	0.606011	7.39645	11.329	0.00321502	0.0174018
CAALFM_C502520WA	-0.605793	1.22596	3.94237	0.063294	0.143105
RPS3	0.605487	8.9181	6.26343	0.0215287	0.065862
CAALFM_C304690CA	-0.605298	2.29398	8.46079	0.00970622	0.0376266
CAALFM_C302910WA	-0.605289	3.28473	6.96738	0.0171102	0.0566494
RGD1	-0.604037	4.8759	8.53518	0.00944615	0.0368987
PRP45	-0.603691	3.99942	7.61381	0.0133166	0.0472496
ADO1	0.60366	6.09945	6.75226	0.0186346	0.0598996
CAALFM_C109340CA	-0.602673	6.64045	12.3116	0.00265912	0.0152213
CYS4	0.602573	7.64997	9.43453	0.00623441	0.0274932
CAALFM_C504310WA	-0.601562	3.98755	7.97733	0.0116076	0.0430313
CAALFM_CR10310WA	-0.601352	-0.594305	0.90856	0.353725	0.501717
CAALFM_C209710CA	-0.601266	5.04654	4.33957	0.0508602	0.122056
SMI1	-0.601256	7.89181	7.68568	0.0129572	0.0463833
ALS3	0.600723	8.249	6.08725	0.0231996	0.0692206
MNN10	0.600515	4.38281	14.8054	0.00107031	0.00823801
GCN20	0.600381	5.45325	16.8659	0.000722431	0.00635045
DRS1	0.600122	6.84523	14.5867	0.00135137	0.00957854
CAALFM_C300940WA	-0.600122	7.73347	9.33758	0.00645835	0.0280969
CAALFM_C602720CA	-0.599363	7.00095	6.42846	0.0200857	0.0629137
CAALFM_C303430CA	-0.598873	2.64935	7.09474	0.0162747	0.0544504
CAALFM_CR04350CA	-0.59887	3.33997	7.94639	0.0108984	0.040981
CAALFM_CR05150WA	0.598652	2.72151	12.92	0.00220647	0.0133249
ECM33	0.598359	9.1001	4.53404	0.046404	0.114055
CAALFM_C503030WA	-0.597985	1.54315	1.87155	0.187122	0.319127
CAALFM_C702090CA	0.597675	3.84893	12.0522	0.00288314	0.016073
GPH1	0.59723	9.07633	7.01593	0.0157662	0.0532806
PDA1	0.596608	8.00178	5.91667	0.0249582	0.0729185
CAALFM_C301090WA	-0.596297	2.5451	2.18186	0.155888	0.279465
CAALFM_C105890WA	0.595406	3.87567	1.12767	0.302983	0.448679
CAALFM_C208840WA	-0.595324	3.08948	1.9153	0.184104	0.315813
CAALFM_C201060CA	0.595275	2.91844	12.7158	0.00234795	0.0139149
CAALFM_C208930WA	-0.594947	5.47912	3.15026	0.0936461	0.191251
CAALFM_C208100WA	-0.594626	9.28423	2.75055	0.113496	0.219167
KEL1	0.594616	7.33649	4.91585	0.0403877	0.10313
CAALFM_C501030WA	0.59451	0.113303	0.927992	0.348759	0.497204
CAALFM_C202900WA	-0.594286	3.03585	6.83458	0.0180337	0.058836
CAALFM_CR08550WA	0.594145	6.19542	12.8639	0.00224432	0.0134716
CAALFM_C504850WA	-0.594038	2.80204	2.8289	0.11068	0.215265
CAALFM_CR06980WA	-0.593293	2.28791	1.38213	0.254135	0.396159
CAALFM_C600770CA	-0.593181	3.56798	13.1932	0.00203191	0.0125084
MAF1	-0.59307	5.94935	10.6092	0.00459245	0.0224433
YHB5	-0.593049	5.6169	1.61925	0.22016	0.357916
TRP99	0.592871	5.22216	6.38148	0.0216393	0.0660665
CAALFM_C501230CA	-0.592772	5.12624	15.3069	0.00110301	0.00838384
CAALFM_C205410WA	0.592558	8.06942	11.1547	0.00340998	0.018012
CAALFM_C403130WA	0.592541	4.724	9.12968	0.007629	0.031498
CAALFM_C202620WA	-0.592486	5.01964	9.5276	0.00663383	0.0285304
CAALFM_C208900WA	0.592176	3.8045	9.56432	0.00654964	0.028313
ERF1	0.592148	7.29703	16.019	0.000750849	0.00653338
SEC61	-0.591831	5.79194	1.61912	0.220179	0.357916
CAALFM_C205580WA	0.591654	7.93014	13.0193	0.00185194	0.0118348
COX9	0.591628	5.40639	9.06025	0.00715015	0.0301324
RPC10	0.591441	3.85159	14.6075	0.00134336	0.00953299
CAALFM_C503840WA	-0.591417	1.71837	4.26025	0.054465	0.128424
PGI1	0.591043	7.82059	4.37478	0.0500182	0.120679
FRS2	-0.590681	7.52306	5.93503	0.0247619	0.0724852
CAALFM_C603990CA	-0.590268	3.24371	7.89524	0.0119706	0.0441325
CAALFM_CR08130WA	0.590107	3.16315	9.49776	0.00609302	0.0271092
MSN4	0.589349	7.48771	6.55429	0.0190587	0.0608648
CAALFM_C108530WA	0.588407	2.82002	5.45305	0.0319192	0.0871035
ASH1	-0.588127	3.74768	8.13012	0.0101515	0.0388743
CAALFM_C112810WA	-0.587882	4.4421	5.62933	0.0282724	0.0794126
RTT101	-0.587162	4.3454	9.96377	0.00570757	0.025994
CAALFM_C600500CA	-0.587086	2.3591	8.6474	0.00906864	0.0357477
CAALFM_C300360WA	0.587041	7.50721	11.5963	0.00293969	0.0163169
ERG5	0.586707	7.37649	4.53151	0.0480455	0.117326
UBR1	0.585947	8.85848	14.1265	0.0013132	0.00941852
CDC45	-0.585907	4.27791	9.69986	0.00624914	0.0275062
OYE32	-0.585494	9.49204	1.37194	0.255833	0.398087
CAALFM_C304130WA	-0.585388	5.05613	2.08354	0.166894	0.293756
NOC2	0.585204	7.02192	9.41448	0.00628	0.0276219
CAALFM_C205020WA	0.58463	3.5388	14.7658	0.0012842	0.00927665
KRE1	-0.584383	5.16541	2.48568	0.133133	0.247306
CAALFM_CR04820WA	-0.584306	9.39516	2.68971	0.117307	0.224516
ATO10	-0.584222	4.95621	2.00515	0.174653	0.303868
IAH1	0.584201	4.58236	10.6085	0.00459345	0.0224433
CAALFM_CR05160CA	-0.584101	1.54731	5.82751	0.0272168	0.0773532
CAALFM_C206230WA	0.583941	5.84791	11.3163	0.00322881	0.0174252
CAALFM_C505210WA	-0.583785	5.6053	11.3571	0.00359574	0.0188169
NIK1	0.583414	6.29508	13.7259	0.00173437	0.0112469
CAALFM_C109020WA	0.583285	6.49833	12.9812	0.0021659	0.0131192
CAALFM_C307050WA	-0.583272	1.33638	2.86502	0.108591	0.212641
AHR1	-0.582932	7.02446	4.35621	0.0520868	0.12428
BOI2	0.582617	8.03829	12.3574	0.00262157	0.0150778
CAALFM_C102680CA	-0.582578	4.25188	11.0907	0.00391973	0.0201538
IFA21	-0.582487	4.67065	9.26471	0.00727354	0.0305458
CAALFM_C304630WA	-0.582477	5.14325	7.09616	0.015262	0.0518959
CAALFM_C108610CA	-0.582447	10.9821	3.3888	0.081174	0.171462
CAALFM_CR05370WA	0.582226	10.7013	4.32931	0.0511086	0.122502
CAALFM_C205600WA	-0.582122	4.72182	3.41814	0.0799688	0.16945
SAP2	-0.58202	5.00451	3.66928	0.0722322	0.15691
COX13	0.581769	6.89932	8.90079	0.00758519	0.0313532
GAP1	-0.580841	7.31939	5.27533	0.0330621	0.0892144
CAALFM_C106860WA	-0.580682	3.60317	1.8901	0.18687	0.318823
CAALFM_C210540WA	0.5806	5.7343	9.48527	0.00612067	0.0271985
CAALFM_CR10770WA	0.58019	5.01981	6.65493	0.0193746	0.061419
IDP2	0.579725	8.3721	2.06079	0.169101	0.29686
[truncated: 4,040 more rows]

## Sheet: 4-edgeR_Ca_CAF2_with_PavwoPa
genes	logFC	logCPM	F	PValue	FDR
CAALFM_C406910WA	8.96345	7.57302	179.016	3.56387e-11	5.38056e-08
ATO7	8.33342	0.37094	74.2627	3.13085e-07	1.2862e-05
CAALFM_C205060CA	8.19985	8.48408	172.031	2.24048e-10	1.26374e-07
CAALFM_C300140WA	8.0667	0.0134852	9.89435	0.0115577	0.0333637
MFA1	7.76906	1.35873	55.2773	9.17594e-07	2.71635e-05
CSA2	7.67586	1.79755	47.1514	2.59264e-06	5.88608e-05
MDR1	7.35248	7.63702	153.346	1.35655e-10	1.02403e-07
CAALFM_C403340CA	7.34477	7.07823	72.8292	5.91311e-08	4.35479e-06
NRG2	7.29541	0.429615	60.0557	5.25917e-07	1.85732e-05
CAALFM_C700770WA	7.25176	9.22839	102.186	4.04673e-09	6.29636e-07
GST1	7.17126	5.44534	80.698	6.70848e-08	4.64834e-06
CAALFM_C206450CA	7.00867	4.51075	95.6207	1.95996e-08	1.8494e-06
TPO2	6.85795	7.86869	117.649	1.27011e-09	3.65246e-07
OYE32	6.46307	9.49204	111.624	1.96239e-09	4.55802e-07
CAALFM_C700760CA	6.32128	3.53423	91.8585	2.62971e-08	2.30157e-06
CAALFM_C303460CA	6.24344	7.90522	211.214	8.36409e-12	2.52554e-08
TRR1	6.2284	10.9714	131.984	4.85445e-10	1.9544e-07
OYE23	5.9504	6.35046	52.054	1.36484e-06	3.71272e-05
CAALFM_CR04620CA	5.77556	-0.195376	19.3705	0.000502838	0.00290982
CAALFM_C601520WA	5.53868	5.68025	72.798	1.39316e-07	7.74195e-06
SNQ2	5.50473	12.0245	230.817	3.81166e-12	2.30186e-08
CAALFM_C300990CA	5.42476	2.64572	67.2383	2.42544e-07	1.11811e-05
FRE9	5.36857	8.09579	153.742	1.3269e-10	1.02403e-07
CAALFM_C106980CA	5.35929	8.75099	103.052	3.77794e-09	6.29636e-07
CAALFM_CR07740WA	5.35621	5.25249	81.9826	5.99076e-08	4.35882e-06
CAALFM_C401340WA	5.32036	2.71859	27.5173	6.36949e-05	0.000610561
CAALFM_C109210CA	5.30915	10.6947	143.318	2.41668e-10	1.26374e-07
CAALFM_C505180WA	5.27017	2.99852	243.687	1.40541e-11	2.82908e-08
CFL2	5.23179	7.01798	104.485	3.37541e-09	6.11859e-07
CAALFM_C208200WA	5.20359	8.43302	65.5181	2.90112e-07	1.23379e-05
CAALFM_C304170WA	5.08356	5.83337	132.22	1.72305e-09	4.39096e-07
CAALFM_C402520CA	5.02973	7.28816	100.698	4.55957e-09	6.88382e-07
ARR3	4.84704	8.20722	91.4135	9.94524e-09	1.1121e-06
CAALFM_C203110WA	4.76495	6.5675	63.4081	1.68798e-07	8.96546e-06
OYE22	4.70235	7.57625	165.947	6.87635e-11	8.30526e-08
RCH1	4.70192	7.31392	71.0943	7.11274e-08	4.77265e-06
PDR16	4.61087	8.88907	141.609	2.67606e-10	1.26374e-07
CAALFM_C301640CA	4.57128	0.879242	65.2761	2.97607e-07	1.24733e-05
YMX6	4.54103	6.59963	65.6944	1.29459e-07	7.38718e-06
WOR1	4.53744	3.87447	109.318	7.26566e-09	8.79847e-07
CAALFM_C704080CA	4.46026	0.635477	35.9146	1.39517e-05	0.000198713
CAALFM_C503430WA	4.4234	0.82984	73.5813	1.2921e-07	7.38718e-06
CAALFM_C208100WA	4.23623	9.28423	116.918	1.33755e-09	3.67157e-07
CAALFM_C111710CA	4.19742	1.04334	52.8095	1.24148e-06	3.4183e-05
CAALFM_C102690CA	4.18794	-0.233254	12.7839	0.00229961	0.0093897
EBP1	4.14639	6.24606	130.698	1.88242e-09	4.54719e-07
TSA1B	4.14346	10.4452	136.309	3.6976e-10	1.59499e-07
CAALFM_C304450CA	4.13067	1.28901	46.1682	2.96645e-06	6.47807e-05
TSA1	4.10752	10.4582	124.905	7.71215e-10	2.52145e-07
CAALFM_C110360CA	4.07522	9.16248	73.4229	5.55539e-08	4.19362e-06
CIP1	4.01528	6.54742	76.3744	9.93023e-08	6.05744e-06
HAP3	3.98119	5.37999	118.096	4.06621e-09	6.29636e-07
YIM1	3.98061	8.1721	79.9919	2.85831e-08	2.46591e-06
CAALFM_C110050WA	3.94911	1.52901	55.0111	9.47523e-07	2.77771e-05
CAALFM_CR00380WA	3.93069	3.14067	44.7978	3.59206e-06	7.58476e-05
CAALFM_C209800CA	-3.86829	0.977684	33.9646	1.93905e-05	0.000256234
CAALFM_C303570CA	3.84453	3.80307	43.445	4.35759e-06	8.9205e-05
YHB1	3.82186	11.0235	61.931	2.01165e-07	9.87673e-06
CAALFM_C109780CA	3.81128	8.69984	85.1248	1.75299e-08	1.68037e-06
PRN1	3.7876	6.71468	147.291	1.91448e-10	1.26374e-07
RAS2	3.7686	6.49828	167.823	2.72042e-10	1.26374e-07
CTA4	3.75399	10.418	126.074	7.13329e-10	2.52145e-07
CAALFM_C704090CA	3.7467	9.01561	97.6344	5.85678e-09	8.00914e-07
FCR1	3.74143	8.59926	95.0293	7.28471e-09	8.79847e-07
CAALFM_CR07540CA	3.71845	2.58238	66.7247	2.55767e-07	1.15939e-05
TAR1	-3.66174	11.5181	38.7201	8.87539e-06	0.000145648
CAALFM_C207280WA	3.62369	3.43196	57.8755	6.74935e-07	2.23952e-05
tL(UAA)4	3.59024	-0.567438	18.8227	0.0004372	0.0026246
tE(UUC)3	3.53544	-0.846435	32.6804	2.42581e-05	0.000304563
CAALFM_C701010WA	3.51353	1.461	143.891	8.996e-10	2.71634e-07
CAALFM_C402510WA	3.51198	6.81721	52.0979	1.35731e-06	3.70895e-05
TRX1	3.49864	8.61731	28.5975	3.57324e-05	0.000407917
ADH4	3.4859	0.483258	60.0641	5.25414e-07	1.85732e-05
CAALFM_C600850WA	3.48011	8.71016	62.4023	1.90148e-07	9.64963e-06
GTT1	-3.46572	1.58263	36.7023	1.22578e-05	0.00018188
tR(CCG)1	3.45094	0.385736	63.6473	3.54031e-07	1.4055e-05
PGA31	3.43314	3.12818	15.7254	0.000982446	0.00489117
HNT2	3.4166	4.68229	47.6267	2.43104e-06	5.60728e-05
IME2	3.415	3.37461	40.0033	7.27283e-06	0.000123372
FLU1	3.37888	7.78932	85.2717	1.72926e-08	1.68037e-06
CAALFM_C701430CA	3.34837	10.5138	74.8287	4.8e-08	3.8141e-06
RBR1	-3.30219	0.648579	8.28175	0.0103659	0.030635
CAALFM_C500510WA	3.29567	1.50348	40.2439	7.0099e-06	0.000120951
CAALFM_C701150WA	3.28838	5.01774	71.5499	6.77354e-08	4.64834e-06
SSU1	3.28461	8.3065	31.1694	2.13041e-05	0.000274905
CRZ2	3.27444	7.49531	91.2052	1.01284e-08	1.1121e-06
CAALFM_CR03710CA	3.273	5.87731	65.2163	2.99492e-07	1.24733e-05
CDR11	3.25772	11.8254	97.3613	5.99089e-09	8.00914e-07
FGR2	3.24338	0.330686	24.0491	0.000130387	0.00105693
CAALFM_C200760CA	3.21914	8.98272	91.3898	9.9659e-09	1.1121e-06
GST3	3.21607	5.81653	87.2294	3.83043e-08	3.16876e-06
CAALFM_C404200CA	3.1789	5.26535	57.5907	3.43468e-07	1.37365e-05
MRF1	3.14876	8.45808	109.172	2.35609e-09	5.08158e-07
CAALFM_C105970WA	3.14269	2.81276	12.8604	0.00224671	0.00924241
CAALFM_C112470WA	3.1126	2.84011	44.5637	3.71299e-06	7.81281e-05
IFD6	3.08942	6.15348	20.002	0.000327573	0.00211574
IHD1	3.08189	6.28588	99.4167	1.47137e-08	1.532e-06
CAALFM_C210000CA	3.06208	3.04505	28.3291	5.43168e-05	0.000537639
CAALFM_C601870CA	3.02585	6.66994	73.6618	5.41825e-08	4.14188e-06
ROA1	3.01846	10.6815	63.0762	1.75535e-07	9.13843e-06
CAALFM_C700350CA	2.99575	10.7362	29.6303	2.89323e-05	0.000348747
CAALFM_C110850WA	2.98343	-0.0238035	14.322	0.00145795	0.00671371
FRP2	2.98165	7.75856	71.8598	6.55312e-08	4.60166e-06
FGR46	2.97883	1.74105	40.3778	4.09322e-06	8.49449e-05
OFI1	2.97593	1.09941	21.5622	0.000226896	0.00158774
IFA14	2.97085	4.89212	87.1284	1.458e-08	1.532e-06
ARO9	2.9671	5.26879	120.743	3.43875e-09	6.11859e-07
CAALFM_CR02340WA	2.95284	0.495037	36.0109	1.37313e-05	0.000196501
HWP2	2.94939	1.12697	39.3936	4.81898e-06	9.44864e-05
PRN3	2.90356	5.82658	52.785	1.24528e-06	3.4183e-05
CAALFM_C208350CA	2.89588	-0.625302	9.57232	0.00653146	0.0211948
CAALFM_CR09140CA	-2.88488	8.48535	65.6857	1.29588e-07	7.38718e-06
CAALFM_C503030WA	2.87835	1.54315	55.3796	4.56506e-07	1.66914e-05
CAALFM_C600810CA	2.832	4.53969	43.0718	4.59977e-06	9.25934e-05
tP(UGG)4	2.82936	-0.559379	10.0221	0.00559522	0.0187615
HSP31	2.8222	3.05557	14.261	0.00148383	0.00677313
SEF1	2.81938	8.18411	98.6451	5.38852e-09	7.74793e-07
TDH3	-2.81828	11.1776	56.5736	3.91077e-07	1.48535e-05
PGK1	-2.81824	9.19555	90.4648	1.08101e-08	1.16576e-06
PGI1	-2.80018	7.82059	124.484	7.93302e-10	2.52145e-07
STP4	2.79827	9.32846	74.5824	4.9237e-08	3.86159e-06
PGA7	2.79439	6.8212	51.3131	1.49925e-06	3.94044e-05
IFR1	2.77941	5.00548	69.2087	1.98454e-07	9.87673e-06
CAALFM_C200750WA	2.7653	5.09385	40.0583	7.21172e-06	0.00012316
OPT8	2.73574	7.82598	103.788	3.56495e-09	6.15106e-07
PGA48	2.7296	3.9181	73.5446	1.29664e-07	7.38718e-06
AAP1	2.71611	7.41532	41.4926	3.41362e-06	7.25874e-05
CAALFM_C208420WA	2.71328	5.57424	62.7537	3.90003e-07	1.48535e-05
CAALFM_C207180WA	2.71191	-0.136115	20.1453	0.00031649	0.00206987
CAALFM_CR04610CA	2.7091	2.75337	41.0161	6.23504e-06	0.000111072
PST2	-2.70772	2.76343	53.8717	1.08858e-06	3.10093e-05
BUL1	2.69433	6.2199	48.9175	2.04611e-06	5.06412e-05
ENO1	-2.69348	10.0122	97.6555	5.84656e-09	8.00914e-07
DAL8	2.69345	5.72591	75.2408	1.10393e-07	6.66664e-06
FDH1	-2.68804	7.99303	105.988	9.15256e-09	1.06293e-06
CAALFM_C207630CA	-2.68543	6.25418	62.1736	1.9541e-07	9.83401e-06
KRE62	2.67845	0.345683	22.3362	0.00019021	0.00138897
GLR1	2.6778	8.30489	52.2266	6.95456e-07	2.25799e-05
AAH1	2.66048	3.44895	56.7927	7.66077e-07	2.39707e-05
CAALFM_C407000WA	2.65617	1.77627	20.0034	0.000327463	0.00211574
CAALFM_CR04990CA	2.65196	0.00655721	18.0493	0.000531274	0.00303248
CAALFM_CR03840CA	2.64673	4.45834	34.4508	1.78412e-05	0.000239962
CAALFM_CR09100CA	2.64198	6.8118	75.3443	4.552e-08	3.66527e-06
CDC19	-2.62694	8.37693	104.225	3.44481e-09	6.11859e-07
PEP12	2.62351	5.52134	50.9144	8.33297e-07	2.55446e-05
CAALFM_C109240CA	2.60159	3.35328	68.1821	2.20193e-07	1.05535e-05
CAALFM_C112070CA	2.59494	5.05552	52.9511	1.21978e-06	3.39458e-05
SPR3	2.59456	-0.400437	29.3085	4.49973e-05	0.000479257
CAALFM_C405830WA	2.58698	1.54255	54.7947	9.72664e-07	2.824e-05
GST2	2.57745	7.58055	69.6464	8.3213e-08	5.23462e-06
PGA22	2.57262	-0.430227	11.6114	0.00331428	0.0125643
ECM22	2.55968	9.03179	57.5909	3.43457e-07	1.37365e-05
CAALFM_C703780CA	2.55499	4.99451	23.0846	0.000160941	0.00122101
CAALFM_C109700WA	2.55052	0.258016	13.2104	0.00202143	0.0085188
ISU1	2.53729	9.47751	55.7916	4.32652e-07	1.61283e-05
CAALFM_C106970CA	2.50896	7.94764	77.9527	3.49604e-08	2.9736e-06
GRP2	2.49809	8.38082	27.6207	4.3822e-05	0.000469222
CAALFM_C104010CA	2.49612	5.82835	26.69	5.34529e-05	0.000532677
DRE2	2.49279	7.88645	30.1281	2.61768e-05	0.000323938
CAALFM_C400640WA	2.4878	-0.432657	19.2511	0.000393215	0.00241981
SOU2	-2.48551	3.07014	56.0305	8.38473e-07	2.55734e-05
RAD57	2.48005	4.87818	20.0183	0.000326287	0.00211428
CAALFM_C105890WA	-2.47364	3.87567	23.8436	0.000136309	0.00109464
CAALFM_C208320CA	2.46638	1.66848	20.2802	0.000306447	0.00201594
RME1	2.46251	6.7009	132.001	1.74504e-09	4.39096e-07
CAALFM_C502800CA	2.45932	1.37403	23.2577	0.000154912	0.0011842
CAALFM_C503730WA	-2.45834	3.21467	59.4471	5.63435e-07	1.94433e-05
ASR2	-2.45432	7.61811	40.3566	4.10753e-06	8.495e-05
CAALFM_C200180CA	2.45389	6.69492	44.4856	2.13142e-06	5.2067e-05
IFR2	2.45226	6.81917	58.8667	2.92562e-07	1.23551e-05
CAALFM_C703230CA	2.44376	3.17225	20.6538	0.000217144	0.00154638
CAALFM_C504460CA	2.44356	-0.540433	17.9061	0.000551068	0.00311893
CAALFM_C701440WA	2.43928	4.49217	19.0251	0.000329587	0.0021242
CAALFM_C403950CA	2.43317	0.828979	25.262	0.000100786	0.000871836
FAV1	2.43306	2.78453	93.0852	2.3867e-08	2.15124e-06
CAALFM_C101130WA	2.43079	9.28568	59.3972	2.73903e-07	1.1815e-05
CAALFM_C500530WA	2.42255	0.554962	42.0986	5.30502e-06	0.000100889
CAALFM_C504980WA	2.41504	7.96	29.8022	2.79462e-05	0.000339572
LPD1	2.40938	10.6574	35.5826	9.32292e-06	0.000151289
CAALFM_C207070WA	2.40848	7.25913	50.2892	1.71001e-06	4.39437e-05
FBA1	-2.40177	9.76345	96.2914	6.54993e-09	8.24063e-07
RTA3	2.39964	8.13171	58.399	3.10182e-07	1.28301e-05
CAALFM_C702280WA	2.39666	2.51442	4.44609	0.0499675	0.104703
CAALFM_C109320CA	2.39619	8.11974	41.9566	3.16831e-06	6.80904e-05
CAALFM_C301180CA	2.39286	8.26747	37.7787	6.33837e-06	0.000112581
TOS4	2.38787	5.33044	74.0348	5.21157e-08	4.03496e-06
MRV3	2.38096	0.144202	8.28097	0.0103689	0.030635
RBT5	2.38094	8.88019	13.7449	0.00147618	0.00676892
CAALFM_C110310WA	2.37847	5.46587	18.0571	0.000530216	0.00303217
CAALFM_C503520WA	2.36811	0.95705	38.688	8.92028e-06	0.000145988
CAP1	2.36578	9.56681	85.86	1.63772e-08	1.64837e-06
ECM38	2.35758	5.65355	24.9138	0.000108431	0.000922276
TTR1	2.34392	7.76736	60.4889	2.39504e-07	1.11259e-05
tL(CAA)5	2.33369	-0.373489	21.2984	0.000241161	0.00165496
NBP35	2.31706	5.72607	69.1015	2.00608e-07	9.87673e-06
HAP43	2.29499	8.15382	93.9077	8.01466e-09	9.4903e-07
FTR1	2.29169	6.50325	26.9994	5.00138e-05	0.000508473
CAALFM_C200510WA	-2.28484	3.95261	125.424	2.57667e-09	5.3657e-07
PGA61	2.27853	0.819284	35.6676	1.45356e-05	0.000205575
NAR1	2.26563	7.2088	54.4794	5.13832e-07	1.83611e-05
CAALFM_C104470CA	2.26402	5.31999	39.5485	4.69588e-06	9.38151e-05
HXT5	-2.26243	4.46494	49.4637	1.90414e-06	4.7517e-05
CAALFM_C206440CA	2.26202	6.24399	70.0164	1.83031e-07	9.4472e-06
PGA39	2.24867	0.861299	37.3311	1.10697e-05	0.000170536
CAALFM_C105160CA	2.24671	9.28995	22.7221	0.000131141	0.00105992
CSE4	2.23446	2.54964	38.1538	9.70529e-06	0.000155053
GPM1	-2.22483	8.28834	76.1029	4.21247e-08	3.43772e-06
CAALFM_C600290WA	2.22107	9.83739	65.5224	1.32035e-07	7.45197e-06
GAD1	-2.2195	6.32515	106.291	2.93411e-09	5.71583e-07
CHT1	-2.21223	3.37591	48.3998	2.19165e-06	5.26325e-05
CDG1	2.21158	8.62807	25.2581	7.31758e-05	0.000679859
ASR1	-2.2022	7.56325	23.3733	0.0001125	0.00094806
CCC2	2.19872	8.64779	59.732	2.62808e-07	1.16698e-05
CAALFM_C202550CA	2.19476	5.03499	25.4252	9.74111e-05	0.000848868
FGR12	2.18694	-0.823673	7.8546	0.0121551	0.0347527
CAALFM_C406150CA	2.18569	0.384261	19.4236	0.000376925	0.00235934
CAALFM_C304730CA	2.17175	2.13232	26.4979	7.81349e-05	0.000712775
CAALFM_C403370CA	2.16338	6.60683	58.15	3.20042e-07	1.29714e-05
CAALFM_C111200WA	-2.16075	11.0545	22.2723	0.000146004	0.00113803
CUP9	2.14236	10.484	34.6391	1.10585e-05	0.000170536
CAALFM_CR09150WA	-2.13881	2.72598	66.597	2.59178e-07	1.15939e-05
HEX3	2.13719	7.25226	51.4615	1.47119e-06	3.91388e-05
CAALFM_C111080WA	2.13593	8.32064	37.4162	6.74798e-06	0.000117438
CAALFM_C403350CA	2.12716	5.44129	82.5512	5.70081e-08	4.25027e-06
PCL2	-2.12286	1.79974	28.9549	4.81389e-05	0.000500363
CAALFM_C303070WA	2.10716	6.03047	151.916	5.91141e-10	2.23119e-07
ICL1	2.09952	11.6424	23.6117	0.000106426	0.000909063
PST3	2.07153	6.32343	78.4884	8.17899e-08	5.19925e-06
CAALFM_C205050CA	2.06951	5.3871	24.7369	0.000112562	0.00094806
NAT4	-2.06601	2.29227	43.2765	4.46511e-06	9.07905e-05
CAALFM_C205860CA	-2.06371	4.40482	67.5027	2.36039e-07	1.10499e-05
CAALFM_C406790WA	2.06037	6.48915	50.4984	8.83098e-07	2.65527e-05
CAALFM_C101180CA	2.05567	3.55938	61.3484	4.55129e-07	1.66914e-05
CAALFM_C505240CA	2.04983	1.45746	36.7052	1.22519e-05	0.00018188
OYE2	2.035	5.90307	82.6413	2.21391e-08	2.03819e-06
CDR4	2.03179	11.6504	20.5083	0.000225225	0.00157896
CAALFM_C500100CA	-2.0306	4.95536	48.5669	2.14345e-06	5.2067e-05
FTH1	2.02832	6.82687	109.381	2.31932e-09	5.08158e-07
PDC11	-2.02795	10.3137	41.2689	3.53927e-06	7.49952e-05
FRP1	2.02586	7.83555	61.0333	2.24156e-07	1.06065e-05
CAALFM_CR08270WA	2.02509	4.44399	21.0246	0.000197974	0.00143353
CAALFM_C304310CA	2.02248	0.0782085	24.0796	0.000129531	0.00105281
TPK1	2.02184	7.374	30.4366	2.46157e-05	0.000307772
SAP2	2.01909	5.00451	48.3501	2.20625e-06	5.26331e-05
PIL1	-2.01421	8.00684	106.467	2.89458e-09	5.71583e-07
PHHB	2.00941	6.8422	37.3904	1.09646e-05	0.000170536
PRY1	-2.00938	3.06436	19.0228	0.000416005	0.00252742
CAALFM_C108900WA	-2.00261	1.83899	22.9508	0.000165782	0.00124677
WH11	-2.0025	10.0818	41.9701	3.16149e-06	6.80904e-05
CAALFM_CR06550CA	1.99407	9.18803	37.0279	7.2195e-06	0.00012316
GAL7	-1.98913	7.43354	36.9103	1.18497e-05	0.000178455
CAALFM_C201540WA	1.98648	6.5435	12.5676	0.00245701	0.00990515
ECM4	-1.98626	7.11025	48.6407	2.12254e-06	5.2067e-05
CAALFM_C111530CA	1.98576	3.19512	52.9105	1.22596e-06	3.39614e-05
GCS1	1.98239	8.60529	28.9215	3.3426e-05	0.000387447
CAALFM_C404660CA	1.98236	8.19848	64.3434	1.513e-07	8.23153e-06
CAALFM_C700310CA	1.98195	4.91755	28.7389	5.01777e-05	0.000509283
GRE3	-1.97542	4.81003	118.159	4.04987e-09	6.29636e-07
OPT5	1.96444	1.99841	19.3421	0.00038452	0.00238901
CAALFM_C702210WA	1.96094	-0.332648	7.64812	0.0131436	0.0367985
NRG1	1.9558	6.90057	71.4132	6.87339e-08	4.66386e-06
CAALFM_C305640WA	1.95437	0.336147	18.3644	0.000490445	0.00286441
CAALFM_C112060CA	1.95289	3.90178	48.9625	1.09758e-06	3.11188e-05
MNN4	1.94758	8.96855	27.3099	4.68067e-05	0.000491593
CAALFM_C208580WA	1.93608	0.98055	20.0137	0.000326648	0.00211428
CAALFM_C304870WA	1.93493	1.09893	17.1128	0.000676919	0.0036337
AGA1	-1.93286	4.38484	21.6642	0.000221637	0.00156181
FRE3	1.92904	4.14213	35.6131	9.2721e-06	0.000150928
AOX2	1.92742	12.0897	21.4637	0.000177655	0.00132027
CYP1	-1.91921	7.57739	42.8611	2.74429e-06	6.16089e-05
CAALFM_C209880CA	1.91821	9.16712	38.4547	5.64597e-06	0.000105235
CAALFM_C304210WA	-1.91165	3.23043	14.2618	0.00148351	0.00677313
CAALFM_C405040WA	-1.90699	0.0820544	12.3773	0.00260546	0.0104201
HYR1	1.89924	3.39713	29.7281	4.15637e-05	0.000452257
CAALFM_C500570WA	1.89378	10.1593	31.0639	2.17488e-05	0.000277973
XYL2	-1.89181	7.70971	23.2825	0.000114913	0.000963833
CAALFM_C111850WA	1.89111	9.46677	38.1237	5.97391e-06	0.000108992
CAALFM_C701700WA	1.89102	8.3113	31.272	3.12299e-05	0.000371987
CAALFM_C114190CA	1.88924	5.84414	31.9027	2.78633e-05	0.000339247
CAALFM_C114180WA	1.88741	4.96913	23.2083	0.000116929	0.000972139
PGA46	1.8847	1.17238	11.6343	0.00329008	0.0124961
CAALFM_C302660WA	1.87826	2.58064	9.88073	0.00587205	0.0195224
ERG28	-1.87356	1.40654	29.9261	4.00454e-05	0.000439698
CSP37	-1.87224	7.8123	63.5837	3.56465e-07	1.4055e-05
CAALFM_C103750WA	-1.86865	3.60504	99.125	5.18081e-09	7.63095e-07
RHD3	1.86662	5.70603	8.67374	0.00898252	0.027369
HMS1	1.8662	6.88864	20.9694	0.000260374	0.00176674
CAALFM_C106340WA	-1.86245	0.945754	21.5701	0.000173086	0.00129364
SKN1	1.86198	8.32901	25.5228	6.8993e-05	0.000651504
TPO4	1.85086	6.10374	57.659	6.92148e-07	2.25799e-05
CAALFM_C603550CA	1.84737	13.7327	31.8329	1.87268e-05	0.000250201
QDR2	1.84013	5.94483	51.3852	7.8064e-07	2.41758e-05
CAALFM_C111260CA	1.83852	3.01578	37.1505	1.13973e-05	0.000173371
IFE2	1.83773	10.1285	20.265	0.000239484	0.00165285
CAALFM_C105150CA	1.83183	-0.362953	15.4825	0.00105051	0.00516196
GRE2	1.82733	5.7738	40.2145	7.04143e-06	0.000121149
CAALFM_CR03240CA	1.8245	4.3519	13.0483	0.00212244	0.00884569
PGA12	1.8237	-0.401923	3.69827	0.0712165	0.137054
SOK1	1.82319	10.5249	41.7476	3.27633e-06	6.99144e-05
CDR1	1.82084	13.565	37.9165	6.18998e-06	0.000110869
CAALFM_C208620WA	1.81531	6.65596	33.779	1.29559e-05	0.000189445
CAALFM_CR00840CA	1.81494	0.613939	2.46755	0.134466	0.225817
CEK2	1.81026	4.85716	22.2815	0.000145682	0.00113803
CAALFM_C703830CA	-1.80777	2.13874	17.0885	0.000681254	0.00365372
PGA53	-1.8062	4.42104	49.8996	1.79874e-06	4.54502e-05
ZCF4	1.80595	3.08799	18.7485	0.00044536	0.00265764
LDG3	1.80379	-0.426577	2.38128	0.141028	0.234749
GAL1	-1.80289	7.42227	35.3213	1.54008e-05	0.000213315
CAALFM_C301820WA	-1.80151	3.81052	35.9146	8.78582e-06	0.000144966
ALK2	1.7992	8.34915	57.2027	7.30037e-07	2.32036e-05
PDE2	1.79532	7.6667	42.8746	4.73374e-06	9.4007e-05
CAALFM_C305440CA	1.79526	3.64912	43.676	2.41546e-06	5.60728e-05
PTP2	1.78887	9.0421	21.8012	0.000163605	0.00123418
CAALFM_C700870WA	1.78068	3.93796	38.2197	9.60445e-06	0.000154259
CAALFM_CR08830WA	1.77662	6.52345	22.2085	0.000148262	0.00114789
SFH5	1.77586	5.45265	72.3621	6.21241e-08	4.41373e-06
CAALFM_CR01440CA	1.77165	5.80144	32.0523	1.79518e-05	0.000240913
tH(GUG)1	1.76501	0.502928	12.5253	0.00216831	0.00900581
tL(CAA)6	1.76262	-0.588228	15.4183	0.00106936	0.00523327
CSP1	1.7551	2.10443	37.2905	1.11425e-05	0.00017122
CAALFM_C701690WA	1.75438	3.21394	24.6044	0.000115773	0.000965683
CAALFM_CR09940WA	1.75061	1.53881	37.9926	6.10956e-06	0.000110184
CAALFM_C210650WA	-1.74901	2.49743	63.285	3.68149e-07	1.41608e-05
HGT12	-1.74804	3.68634	7.83001	0.0122683	0.0349144
CAALFM_C106220CA	1.74626	1.28967	11.9005	0.00302391	0.0117297
CAALFM_C114350WA	1.74609	5.83481	87.8893	3.62675e-08	3.04194e-06
MAS1	1.74393	6.26611	74.1933	1.21882e-07	7.28759e-06
CAALFM_C406770WA	1.73775	6.25547	40.7348	3.86057e-06	8.06712e-05
CAALFM_CR02770CA	-1.73572	2.68645	91.9947	2.60142e-08	2.30157e-06
CAALFM_CR09390CA	-1.73278	-0.738929	5.78399	0.0277205	0.0656745
ECE1	1.73264	2.20947	6.48567	0.0207426	0.0524777
GAL102	-1.73203	4.88485	59.8537	2.58897e-07	1.15939e-05
DPM1	-1.73084	4.19224	35.2461	1.55961e-05	0.000215525
CAALFM_C106870CA	1.72899	3.2116	12.7793	0.00230283	0.00939648
CAALFM_C601810WA	1.72834	0.787352	25.4846	9.62135e-05	0.000840859
ADH1	-1.72807	9.78809	40.5528	6.68771e-06	0.000116726
KIN3	1.72325	2.23564	41.3838	5.90015e-06	0.000107973
DAO2	1.72185	4.33209	39.4765	7.88799e-06	0.00013159
CCE1	1.71795	1.09182	5.73006	0.0283595	0.0668214
CAALFM_CR10180WA	-1.71761	2.31447	77.795	8.71221e-08	5.42403e-06
CAALFM_C600800CA	1.71508	7.69343	44.3696	2.16974e-06	5.24122e-05
GUT2	1.70744	9.26972	36.2699	8.24851e-06	0.000136848
RDN5	1.70509	4.01006	2.92431	0.103393	0.184401
CAALFM_C601940WA	1.70071	3.61969	25.8994	8.83001e-05	0.000784183
INO2	1.69989	5.62942	17.2977	0.00052424	0.00300577
CAALFM_CR08310CA	1.69755	2.14882	28.9357	4.83162e-05	0.000501343
CAALFM_C601780CA	1.69307	3.88185	31.0693	3.24062e-05	0.000380002
PGA30	-1.6928	0.766821	3.12512	0.0948611	0.171722
GDH3	1.69241	11.0444	30.4477	2.45618e-05	0.000307735
CAALFM_C200770WA	1.68749	5.92961	46.22	2.94531e-06	6.47807e-05
CAALFM_C303860WA	1.68345	2.70937	21.6944	0.000220105	0.00156011
CAALFM_C102370CA	-1.68332	3.34349	17.4332	0.00062257	0.00340731
CAALFM_C303110WA	1.68284	6.31502	58.4284	6.3312e-07	2.12412e-05
CAALFM_C701750WA	1.68065	4.37607	19.4844	0.000371364	0.00234099
CAALFM_C206770WA	-1.67914	1.21832	19.2705	0.000391343	0.00241402
CCS1	1.67781	6.40133	59.8518	2.58956e-07	1.15939e-05
CAALFM_CR03250CA	1.67778	8.4241	37.6013	6.53522e-06	0.000114727
HHT21	1.67482	3.85425	5.87702	0.0266566	0.063603
HGT18	-1.67227	3.55595	53.5273	1.13573e-06	3.20498e-05
JEN1	-1.6719	6.15334	11.3372	0.00361884	0.013532
GLK4	-1.67153	5.24609	37.2233	1.12641e-05	0.000172301
BUB2	1.66979	2.15028	50.7937	1.6023e-06	4.17081e-05
ALS7	1.66833	7.71166	62.4582	1.88886e-07	9.64963e-06
MRV4	1.6683	2.23685	9.47968	0.00674556	0.0217261
PGA6	-1.66817	1.42022	19.3832	0.000380673	0.00236998
CAALFM_C403190WA	1.66767	5.77371	56.2782	8.14135e-07	2.50845e-05
CAALFM_C602210WA	1.66319	2.49465	20.4059	0.000297401	0.00196285
CAALFM_C210020CA	1.66256	0.609409	4.99408	0.039007	0.0862238
PHM7	-1.662	9.11988	17.7464	0.000463653	0.00273438
CAALFM_C407020CA	1.6587	2.02886	32.3567	2.56914e-05	0.00031924
CAALFM_C502110WA	-1.65794	6.92106	36.3067	1.30778e-05	0.000189849
IFU5	1.65487	7.47086	70.4227	7.64736e-08	5.00114e-06
ERO1	1.65456	9.34311	31.7987	1.88508e-05	0.000251302
MEP1	1.65208	6.86285	21.3311	0.000183537	0.00135499
URA1	-1.65032	5.9085	96.8844	6.23331e-09	8.00914e-07
RPN4	1.64871	11.4292	39.067	5.09036e-06	9.79003e-05
CAALFM_C307140CA	1.64737	2.45219	54.0782	1.06137e-06	3.0522e-05
DUR1,2	1.64422	8.03569	15.702	0.000822615	0.00427519
ROD1	1.64356	6.52137	30.0403	3.91987e-05	0.000435601
GLK1	-1.64127	7.46814	35.382	1.5245e-05	0.00021213
VCX1	-1.63709	4.94602	79.3386	7.57433e-08	5.00114e-06
CAALFM_C108610CA	1.63184	10.9821	29.2855	3.10289e-05	0.000370323
GTT11	1.63005	6.33085	49.3915	1.03239e-06	2.98308e-05
CAALFM_C402100CA	-1.62933	2.39099	36.5926	1.24792e-05	0.000184259
CAALFM_C701680CA	1.62846	7.50568	24.0219	9.68063e-05	0.000844817
CAALFM_C107990CA	1.62653	6.21734	17.5351	0.00049116	0.00286581
SOU1	-1.62501	4.09169	64.8013	1.43472e-07	7.87663e-06
PGA38	1.62377	3.93898	5.27688	0.034449	0.0781508
CAALFM_C701880CA	1.62352	1.01807	28.4572	5.29836e-05	0.000528873
CAALFM_C604200CA	1.62312	4.77517	53.9943	1.07233e-06	3.06909e-05
CAALFM_C703240WA	1.62253	7.32494	33.8934	1.96297e-05	0.00025778
VPS20	1.62244	4.88177	60.8391	4.81662e-07	1.74177e-05
CAALFM_C106620CA	1.62221	-0.263534	4.21504	0.055629	0.113802
HGT13	-1.62048	2.64228	28.3734	5.38515e-05	0.000534884
HOM6	-1.61975	4.70776	86.2431	1.58099e-08	1.61823e-06
SCW11	1.61932	3.05024	8.20821	0.0106515	0.031344
PGA17	-1.61917	4.79377	13.0626	0.00211331	0.00881373
CAALFM_C301540WA	-1.61586	1.74223	7.83521	0.0122443	0.0348788
MMD1	-1.61541	4.0758	37.7755	1.0308e-05	0.000161688
CAALFM_C701170CA	1.61492	5.27416	51.3916	1.48434e-06	3.93154e-05
HSP12	-1.61405	6.92143	36.3694	8.10459e-06	0.000134831
ZCF29	1.61119	8.86021	38.3898	5.70859e-06	0.000106074
IFM3	1.61061	5.06859	42.0533	5.34069e-06	0.000101105
CAALFM_C204090WA	1.61026	1.23676	28.0827	5.6989e-05	0.000556887
CAALFM_C601400WA	1.60624	3.73295	22.328	0.000190562	0.00138986
TES1	1.60461	4.91614	24.6321	0.000115094	0.000964014
ACE2	1.6033	7.2729	9.93898	0.00575612	0.0192157
NAG4	-1.60075	0.550872	17.0277	0.000692233	0.00370603
CAALFM_C102040CA	1.60046	7.55006	24.779	8.14792e-05	0.000733884
CHT3	1.59729	3.47995	3.6482	0.0729817	0.139506
CAALFM_CR09830WA	1.59409	5.58675	9.32544	0.00711982	0.0226775
SDS24	1.59386	9.51752	42.7434	2.79575e-06	6.23008e-05
AAT22	-1.5933	5.49943	18.2993	0.000498589	0.00289513
CAALFM_C110680CA	-1.59079	7.29791	31.4515	2.01632e-05	0.000262993
PGA45	-1.58966	5.75533	13.0352	0.00213084	0.00886847
CAALFM_C401730CA	-1.58935	4.61474	159.371	9.74407e-11	9.80741e-08
CAALFM_CR07300WA	1.58832	0.955151	9.18394	0.00748386	0.0236252
CAALFM_C111050WA	1.58317	1.23061	21.8673	0.000211566	0.0015138
CAALFM_C401950WA	1.58229	5.21646	35.9889	1.37814e-05	0.000196751
CAALFM_C404190CA	1.58195	3.91651	16.4023	0.00081746	0.00425206
CAALFM_C600250WA	-1.58044	5.69812	36.5476	1.25714e-05	0.000185167
CAALFM_C305750CA	1.57953	4.58805	16.2319	0.000855849	0.00439941
tY(GUA)2	1.57866	-0.457113	6.85352	0.0178986	0.0466709
CSA1	1.57648	8.60758	22.4375	0.00014034	0.00111809
CAALFM_CR09070CA	-1.57613	3.8142	23.493	0.000109404	0.000927056
AHP2	-1.57579	3.91641	56.8328	7.62463e-07	2.39707e-05
PTK2	1.57295	8.69535	39.7344	4.5527e-06	9.22608e-05
GIG1	1.57251	3.07819	9.4913	0.00671826	0.0216613
RIB4	-1.56944	3.92613	62.2031	4.14193e-07	1.55361e-05
CAALFM_C100880WA	-1.56802	2.82403	18.652	0.000456233	0.00270371
UGA6	1.56713	2.60022	25.7982	9.01614e-05	0.000794172
BET4	-1.56371	1.2827	12.428	0.00256497	0.0102854
GRF10	1.55925	8.67961	27.0402	4.95788e-05	0.0005077
CAALFM_C209610WA	1.55822	4.90182	46.1562	2.9714e-06	6.47807e-05
CFL4	1.55804	3.44485	7.76954	0.0125518	0.0355702
CAALFM_C110580CA	1.55639	5.08806	17.9858	0.000539951	0.0030733
HOL4	1.54877	8.62482	35.5698	9.3444e-06	0.000151289
CAALFM_C502730CA	1.54778	4.84212	50.8041	1.60016e-06	4.17081e-05
NAG3	-1.54727	2.88239	37.5104	1.0755e-05	0.000168163
CTF5	-1.54297	-0.297991	6.75808	0.0185913	0.0480827
CAALFM_CR06650CA	1.54287	3.54717	4.87206	0.0411851	0.0900169
CAALFM_C206630CA	-1.54147	2.54747	28.0366	5.75056e-05	0.000560753
CAALFM_C209650WA	-1.53415	4.48496	51.3053	1.50075e-06	3.94044e-05
CAALFM_C603880WA	-1.53408	2.228	42.089	5.31256e-06	0.000100889
CAALFM_C203880CA	-1.53266	2.4	63.4731	3.60743e-07	1.4055e-05
CAALFM_C111320CA	1.53166	9.32734	23.157	0.000118344	0.000979012
CAALFM_C109060CA	-1.52871	2.0641	20.9093	0.00026407	0.0017838
CAALFM_CR04220CA	-1.52749	3.64321	22.9251	0.000166731	0.00125235
MDM34	1.52633	9.42035	34.0397	1.23453e-05	0.000182728
CAALFM_C205290CA	-1.52506	3.26962	12.3004	0.00266833	0.0106153
CAALFM_C601560WA	-1.5249	3.73419	55.5075	8.92564e-07	2.65527e-05
CAALFM_C114330WA	1.5242	5.1988	36.0835	1.35676e-05	0.000195549
SPO1	1.52235	2.23925	18.3656	0.000392401	0.00241807
PGA32	-1.51996	4.10503	15.6386	0.00100618	0.00498059
CAALFM_C209910CA	-1.51875	0.359442	10.8721	0.00421027	0.0151524
CAALFM_C503710CA	-1.51675	3.73892	62.5903	3.97013e-07	1.49848e-05
CAALFM_C207710WA	1.51439	-0.338578	5.44535	0.0320252	0.0736763
CWH43	-1.513	5.56038	111.637	6.20849e-09	8.00914e-07
CAALFM_C404520WA	1.51256	2.52035	36.8458	7.45308e-06	0.000125025
CAALFM_C113100WA	1.51029	5.7448	10.3817	0.0049547	0.0170202
SCS7	1.50992	8.60953	46.0322	1.68581e-06	4.36936e-05
YOX1	-1.50983	-0.127737	3.66239	0.0724761	0.138767
CAALFM_CR10190CA	-1.50765	2.19527	40.7664	6.47465e-06	0.000113995
YOR1	1.50621	11.6437	20.659	0.000216863	0.00154621
EMP24	-1.50595	4.25651	57.2443	3.58921e-07	1.4055e-05
CAALFM_C407260WA	1.50545	1.90406	15.6231	0.00101048	0.0049896
CAALFM_C202220CA	1.50447	3.21241	19.4365	0.000375736	0.00235625
CAALFM_C104490WA	1.50263	6.20389	29.772	2.81168e-05	0.000340959
EHT1	1.50182	4.82937	28.9987	4.77367e-05	0.000497038
CAALFM_C206530WA	1.50045	4.41355	15.1549	0.00115082	0.00553771
CAALFM_CR02880WA	-1.49984	2.38246	15.3708	0.0009058	0.00459288
PFK1	-1.4957	9.34158	31.1037	2.15799e-05	0.000277552
HGT17	-1.49282	4.43165	5.03103	0.0383738	0.0852674
CAALFM_C405730WA	-1.49156	0.681519	21.9933	0.000205573	0.00147792
CAALFM_C600080CA	-1.48772	4.81654	13.3456	0.00194128	0.00826112
CAALFM_C300940WA	1.48514	7.73347	64.0656	1.56277e-07	8.4264e-06
SOD3	-1.48488	6.76754	51.8409	1.40207e-06	3.76316e-05
AFG1	1.48039	4.91708	48.384	2.19629e-06	5.26325e-05
CAT1	1.47996	12.0753	25.536	6.87914e-05	0.000651147
MIF2	1.47962	7.31539	25.7495	6.56208e-05	0.000626041
CAALFM_CR03260WA	1.47891	8.1918	26.6352	7.59924e-05	0.000700638
CAALFM_CR07260CA	1.47816	-0.0409887	10.4491	0.00484414	0.016769
CSK1	1.47766	-0.698375	4.17294	0.056739	0.115603
SCW4	-1.47374	5.23185	8.99822	0.00731598	0.0232166
CAALFM_CR03270WA	1.47151	3.63344	12.898	0.00222121	0.00916877
CAALFM_C304260WA	1.46598	6.6635	38.5276	5.57642e-06	0.000104584
CAALFM_C202410WA	-1.46582	5.51719	44.4709	3.76225e-06	7.88897e-05
DPM2	-1.46521	1.14629	17.7651	0.000571387	0.00319797
FCY2	-1.46503	3.99744	82.5769	2.22753e-08	2.03819e-06
CAALFM_CR06040WA	1.46478	10.056	27.2247	4.76629e-05	0.000497038
WOR2	1.45866	5.86731	16.7389	0.000747181	0.00392709
SPO22	1.45832	1.90607	16.4054	0.000816792	0.00425206
CAALFM_C405400CA	1.45577	8.30755	32.033	1.80185e-05	0.000241272
MED9	1.45502	3.21031	45.4868	3.26083e-06	6.98303e-05
CAALFM_CR05580CA	1.45418	0.500739	7.40747	0.0134698	0.0374168
MCD1	-1.45059	1.11839	13.2039	0.0020254	0.00852573
CFL5	1.45046	2.17187	9.61716	0.00643058	0.0209893
CAALFM_C203260WA	-1.44718	2.93736	54.8868	9.61874e-07	2.80616e-05
CAALFM_C300230CA	-1.44652	3.35336	14.4426	0.00140825	0.00653184
PCL5	1.44528	5.69928	34.6725	1.09913e-05	0.000170536
CAALFM_C303410CA	-1.44013	7.52548	17.9253	0.000441694	0.00263837
CAALFM_CR10120CA	-1.44012	1.43527	19.9212	0.000334009	0.00214127
CAALFM_C305400CA	-1.4398	1.64376	7.55444	0.0136219	0.0377699
CAALFM_CR00090CA	1.43468	5.15956	41.9331	5.43664e-06	0.00010228
CAALFM_C402620CA	-1.43238	7.01511	19.8077	0.000343291	0.00219148
CIS2	1.4318	6.03585	59.2564	5.75798e-07	1.96454e-05
HAP2	1.43095	6.63092	35.5631	1.47909e-05	0.000207726
OP4	-1.42975	7.10864	5.60827	0.0285342	0.0671543
CAALFM_C301100WA	1.4286	0.220838	6.66662	0.019284	0.0496055
CAALFM_C103470CA	1.42842	0.7777	11.7485	0.00317282	0.0121193
INT1	1.42724	6.94348	35.1478	1.58558e-05	0.000218117
CDC46	-1.42624	4.83	45.4316	1.84528e-06	4.62393e-05
IPT1	1.42548	6.96039	24.878	7.96813e-05	0.00072473
YVC1	-1.42402	4.05717	53.2333	1.17777e-06	3.30817e-05
UGA3	1.42115	8.76084	44.1053	2.25998e-06	5.31051e-05
CAALFM_C200880WA	-1.42016	3.56353	73.6903	1.2787e-07	7.38718e-06
YSA1	-1.41934	2.6089	21.4992	0.000230213	0.00160477
SAP99	-1.41908	2.56346	50.1828	1.73374e-06	4.41773e-05
PSA2	-1.41756	5.05561	38.055	9.8588e-06	0.000156266
CAALFM_C307280CA	1.41739	6.674	39.602	7.73627e-06	0.000129416
PGA58	1.41736	-0.47325	8.79173	0.00860791	0.026468
YHB5	1.41552	5.6169	10.488	0.0047815	0.0166047
ATG1	1.41545	7.45038	65.0296	1.39737e-07	7.74195e-06
SOD5	1.4153	3.17722	24.8693	0.000109454	0.000927056
CAALFM_C500620WA	-1.40978	0.386357	6.84089	0.0179886	0.0468448
CAALFM_CR07460CA	1.40607	3.59223	42.8266	4.76701e-06	9.40783e-05
SAP4	1.406	1.76336	18.5998	0.000462237	0.00273136
CAALFM_C703030WA	-1.4048	4.33705	42.7547	4.81735e-06	9.44864e-05
CAALFM_C401460CA	-1.40084	3.03664	49.0018	2.02345e-06	5.02864e-05
TEC1	1.40081	9.14107	22.0854	0.000152724	0.00117417
CAALFM_C402240CA	1.39677	-0.455076	6.8543	0.017893	0.0466709
CAALFM_C703350CA	1.39429	3.17513	25.7358	9.13311e-05	0.000801669
CAALFM_C104280CA	-1.39053	1.15823	13.6513	0.00177293	0.00771933
CAALFM_C702360WA	1.39006	-0.385825	6.47536	0.0208294	0.0526094
MRV5	1.38812	1.27968	7.67337	0.013018	0.0365824
CAALFM_C306860CA	-1.38703	5.35046	34.713	1.70635e-05	0.000231565
SEO1	1.38498	3.44404	16.1213	0.000881849	0.00449854
GOR1	1.38343	5.33807	81.6911	6.1458e-08	4.41373e-06
SIT1	1.3832	9.98931	32.3327	1.70128e-05	0.000231565
MED20	-1.38183	2.20893	68.9304	2.041e-07	9.94001e-06
CAALFM_CR02690WA	-1.38071	2.45289	57.6813	6.9035e-07	2.25799e-05
CAALFM_C602020CA	1.37615	6.27003	31.8212	2.82747e-05	0.000342186
CAALFM_C112180CA	-1.37584	2.12214	23.7128	0.000140234	0.00111809
TRM1	-1.37529	3.55714	79.1534	7.70171e-08	5.00114e-06
PDR17	1.37504	4.58065	37.1758	1.13508e-05	0.0001731
PGM2	-1.37496	6.09945	68.1859	9.77451e-08	6.02329e-06
LYS5	-1.3748	-0.2655	4.05333	0.0600355	0.120771
ALS6	1.37275	5.84856	42.4546	5.0339e-06	9.79003e-05
TPI1	-1.37265	8.42221	37.9571	6.14689e-06	0.000110479
CAALFM_C305900WA	1.37238	5.4646	18.3549	0.000393522	0.00241981
CAALFM_C401830CA	-1.36998	4.1333	36.5163	1.2636e-05	0.000185216
CYS3	1.36995	9.74768	46.995	1.46097e-06	3.90388e-05
CAALFM_C107980CA	1.36938	5.75361	41.0479	6.2053e-06	0.000110869
CAALFM_C401960CA	1.36813	5.49611	41.9778	5.40075e-06	0.000101922
CAALFM_CR10170CA	-1.36722	5.49204	68.3433	2.16608e-07	1.04648e-05
FCY24	1.36575	3.55544	46.5314	2.82176e-06	6.26494e-05
ZCF2	1.36566	8.76047	44.1206	2.25463e-06	5.31051e-05
FGR41	1.36425	2.66976	2.77985	0.113593	0.197806
CAALFM_C600920WA	1.36099	7.61673	24.5937	8.49647e-05	0.000761278
CAALFM_C704260WA	1.35935	6.57139	29.3795	4.43945e-05	0.00047451
CAALFM_C101930WA	-1.35782	6.00061	30.2682	3.75673e-05	0.000422475
CAALFM_C111280WA	-1.35596	4.44614	59.5416	5.57419e-07	1.93463e-05
SCH9	1.35074	8.00173	37.7493	6.37057e-06	0.000112821
HOS3	1.35012	6.70249	19.8033	0.000343657	0.0021915
CAALFM_C501090CA	-1.34737	4.76462	66.1848	2.70539e-07	1.17796e-05
CAALFM_C203690CA	1.34506	5.87843	18.5158	0.00037701	0.00235934
CAALFM_C202390WA	1.34499	5.8562	11.7731	0.00277196	0.0109554
COF1	-1.34421	4.99684	70.5111	1.74249e-07	9.13843e-06
FGR17	-1.34389	3.63225	70.8056	1.69244e-07	8.96546e-06
PEP1	-1.34253	6.13345	47.696	2.40842e-06	5.60728e-05
RDN58	1.34103	5.45522	3.01118	0.0987419	0.177577
AAF1	1.34002	8.53574	34.5355	1.12699e-05	0.000172301
CAALFM_C302340WA	-1.33834	1.73933	17.1351	0.000672974	0.00361896
CAALFM_C207790CA	-1.33757	1.10403	17.4277	0.00062346	0.00340731
CAALFM_C111960CA	-1.33509	1.96483	34.9013	1.65283e-05	0.000226336
YWP1	-1.33071	7.11525	11.4647	0.00307179	0.0118081
SAP1	1.33045	3.14277	31.4756	3.00956e-05	0.000359896
CAALFM_CR02780WA	-1.33039	0.164049	16.4924	0.000797944	0.00416489
FUR1	-1.32971	3.64176	67.9786	2.2481e-07	1.06065e-05
CAALFM_C407140WA	1.32952	6.36842	27.5935	6.27424e-05	0.000603347
CAALFM_C110060CA	1.32938	5.67268	10.2885	0.00511246	0.0174726
CAALFM_CR08380CA	1.3291	-0.00395266	9.8791	0.00587532	0.0195224
CAALFM_C206740WA	1.32906	4.61417	50.0158	1.77175e-06	4.49562e-05
ATO10	-1.32898	4.95621	13.215	0.00201863	0.00851291
CAALFM_CR07680CA	1.32693	1.32857	21.3047	0.000240808	0.00165496
ISA1	1.32602	7.11062	20.9106	0.00026399	0.0017838
GAP1	1.31969	7.31939	30.9976	2.20335e-05	0.000280718
CAALFM_C701260WA	1.31896	-0.603832	5.00739	0.0387775	0.0859366
CAALFM_C300010CA	1.31876	-0.500735	5.81293	0.0273844	0.0649802
CAALFM_C702450WA	1.31805	6.19281	42.407	5.06924e-06	9.79003e-05
RDN25	-1.31801	18.4264	3.30496	0.0847353	0.157161
MRR1	1.31662	7.12423	69.8905	8.10258e-08	5.19925e-06
ZCF17	1.31635	6.71174	27.0357	7.01067e-05	0.000659462
HGT10	1.31464	3.14372	9.71663	0.00563058	0.0188278
HAP41	1.31259	9.85612	21.9874	0.000156382	0.00119392
CAALFM_C704120WA	1.31038	1.80571	23.6989	0.000140659	0.00111852
CAALFM_C503040WA	1.30993	2.81498	26.7577	7.41356e-05	0.000685694
PHO13	1.30938	1.4622	10.4609	0.00482503	0.0167174
PDC2	1.30892	6.18966	30.4038	3.66324e-05	0.000415833
CAALFM_C504690CA	1.30877	1.35386	8.92885	0.00819458	0.0254171
CAALFM_C202910WA	1.30741	2.32325	13.7783	0.00170781	0.00750625
ATX1	1.30724	3.3464	29.2373	4.56112e-05	0.000481549
PFK2	-1.30454	8.77241	27.3297	4.661e-05	0.00049038
UBI4	1.30443	11.0763	28.6943	3.50252e-05	0.000401721
CAALFM_C604240WA	-1.29894	2.04372	27.5097	4.48636e-05	0.000478677
GAP6	1.29882	9.65881	25.0782	7.61792e-05	0.00070129
SFL1	1.29751	8.72217	24.6668	8.35704e-05	0.000751015
RBK1	-1.2954	4.26639	97.261	1.72952e-08	1.68037e-06
ZCF35	1.29495	6.71934	36.8688	1.19299e-05	0.000179216
CAALFM_C306920WA	-1.29493	3.01725	22.6146	0.00017868	0.00132561
CAALFM_C208090WA	1.2941	4.00481	24.3813	0.00012141	0.00100164
NIF3	-1.2926	3.47567	58.1507	6.53747e-07	2.1812e-05
ZCF20	1.29256	7.06378	17.5802	0.000599293	0.00331119
CAALFM_C204770WA	1.29167	4.51523	28.6576	3.52913e-05	0.000403644
LPG20	1.29143	4.04124	12.2471	0.00271288	0.0107642
LSC1	-1.29083	6.03562	29.9712	3.97087e-05	0.000438086
HGT20	1.28959	2.92978	28.8725	4.89058e-05	0.000505723
CAALFM_C109790CA	1.28933	5.72927	30.9178	2.23819e-05	0.000283959
UME6	1.28725	2.14821	18.2917	0.000499541	0.00289513
GDB1	-1.286	7.9887	31.0987	2.16012e-05	0.000277552
CAALFM_C108730WA	1.28506	4.62825	14.077	0.00156508	0.00705864
CAALFM_C703820CA	-1.28477	0.903191	17.9401	0.000546298	0.00310065
CAALFM_C307580WA	-1.28471	3.3125	37.9458	1.00315e-05	0.000158587
TIP20	-1.28238	4.58392	59.9216	5.33936e-07	1.86538e-05
CAALFM_C101510WA	1.28102	8.34891	27.0059	4.99434e-05	0.000508473
CAALFM_C500810CA	1.28017	-0.19268	11.1831	0.00380381	0.0140325
CAALFM_C602200CA	-1.27707	1.30294	13.7119	0.0017415	0.00761542
CAALFM_C108040WA	-1.27689	4.01226	19.12	0.000406126	0.00248088
PLB5	-1.27586	4.64735	16.1208	0.000881979	0.00449854
CAALFM_C101710WA	1.27433	7.42195	27.6615	4.34468e-05	0.00046603
CAALFM_CR07470WA	1.27353	3.28344	29.5071	4.33338e-05	0.000465645
MTLA2	1.27346	1.5945	9.14991	0.0131557	0.0368152
ERG20	-1.27214	4.21422	33.4366	2.12459e-05	0.000274905
CAALFM_C202920WA	1.27056	8.51085	57.1174	3.64776e-07	1.4121e-05
YPT53	1.27038	5.41106	46.1718	2.96498e-06	6.47807e-05
CAALFM_C406710WA	1.26981	4.30115	16.6978	0.000755377	0.00396327
CAALFM_CR04410WA	-1.26829	1.48241	9.70224	0.006244	0.0205043
EBP7	1.26824	3.57805	25.8556	8.9102e-05	0.000788984
CAALFM_C600680CA	-1.26823	2.42786	33.8834	1.96638e-05	0.00025778
MRV6	1.26684	0.223186	5.92753	0.0260985	0.0627175
PMT2	-1.26648	6.53745	14.9846	0.00101484	0.00500293
LIP10	1.26423	-0.711502	0.99465	0.332459	0.452494
OST1	-1.26223	4.08626	15.8808	0.00094151	0.00472633
FMO1	1.26206	5.38495	21.4488	0.000232911	0.00162045
CAALFM_C111920WA	-1.25988	2.37096	20.4352	0.000295338	0.0019535
CAALFM_C205330CA	1.25964	6.00575	40.8414	6.4016e-06	0.000113039
CAALFM_C209820WA	-1.25848	6.02293	45.9438	3.06e-06	6.62343e-05
TEN1	-1.25833	1.65706	7.47403	0.0140483	0.0387033
CAALFM_C201040WA	-1.25789	1.05689	19.3118	0.000387392	0.00239699
CAALFM_CR06790CA	1.25725	3.77711	38.2818	9.51042e-06	0.000153277
TES15	1.25713	6.08412	12.5467	0.00247287	0.00995576
CAALFM_C701510WA	1.25672	7.33599	13.7054	0.00174485	0.00761904
ALS4	-1.2562	13.6694	10.6179	0.00409827	0.0148824
PFY1	-1.25517	5.4103	33.3244	2.16653e-05	0.000277785
SAP6	1.25442	2.79108	20.7091	0.000214161	0.00152874
MCM3	-1.2531	6.49383	55.341	4.58812e-07	1.66914e-05
ASF1	-1.25145	1.45644	16.7692	0.000741196	0.00390583
CAALFM_C206930CA	1.25006	1.49514	11.1224	0.00387957	0.0142655
CAALFM_C403760WA	-1.24726	-0.232863	4.40254	0.0509817	0.106365
CAALFM_C108350CA	1.24576	7.71384	13.4342	0.0016256	0.00723053
DAG7	-1.24533	6.79346	15.4378	0.00106361	0.00521358
CAALFM_CR02570CA	1.24477	5.25456	11.6207	0.00291585	0.0114047
PMT4	-1.24344	5.60728	22.3983	0.000141663	0.00112123
CAALFM_C111670WA	-1.24209	8.50336	23.7534	0.00010299	0.000888508
CAALFM_C203020CA	1.24122	8.20487	22.2356	0.000147299	0.00114428
CAALFM_C703550CA	1.23754	2.19002	9.48784	0.00672638	0.0216759
CPH2	1.23652	10.1955	15.5939	0.000848794	0.00437734
DOA4	1.23634	7.13811	51.4675	7.71816e-07	2.40257e-05
HSP30	1.23623	9.56924	6.08393	0.0232324	0.0574061
ADE13	-1.2322	6.21285	29.9652	3.97535e-05	0.000438086
HDA1	1.23181	5.85897	32.3188	1.7058e-05	0.000231565
INN1	1.23164	7.87091	19.7774	0.000271175	0.00182567
ERG251	1.23164	7.36244	11.9622	0.00296576	0.011555
CAALFM_C204780WA	1.2314	4.32865	28.3954	3.72598e-05	0.000419798
CAALFM_C207840WA	1.23011	0.749017	5.07578	0.0376226	0.0838696
PST1	-1.22965	4.16653	21.3545	0.000238046	0.0016448
HAK1	-1.22825	2.65617	4.25515	0.054595	0.112111
ETR1	-1.22495	6.10323	14.2641	0.00148251	0.00677313
PGA55	1.22481	7.50063	17.7862	0.00045866	0.00271288
CAALFM_CR05860WA	1.22462	6.64234	19.884	0.00033702	0.00215829
CAALFM_C501990WA	1.22453	0.34766	4.70505	0.0443974	0.0955124
CAALFM_C304840CA	1.22394	7.1857	32.3267	1.70323e-05	0.000231565
PCL1	-1.22325	2.86889	27.112	6.90449e-05	0.000651504
POX18	1.2225	2.74009	4.68939	0.0447132	0.0960616
CAALFM_C100310WA	-1.22235	4.76377	24.7913	0.000111274	0.000940837
CAALFM_C602420WA	1.22119	6.06551	9.33223	0.00647095	0.021077
GAL10	-1.2209	8.36834	20.5161	0.000224783	0.00157845
CAALFM_CR04600WA	1.22024	7.33786	29.5422	4.30477e-05	0.000464223
PGA10	1.21877	0.936672	11.8	0.0031215	0.0119611
MNN24	-1.21874	5.3497	14.0726	0.00156707	0.00706051
VMA10	-1.2185	3.45918	57.1419	7.35259e-07	2.32473e-05
CAALFM_CR01080WA	-1.21827	5.81598	33.0247	1.49192e-05	0.000208573
ALO1	1.21794	8.15538	33.8791	1.96782e-05	0.00025778
TRX2	-1.21788	1.35979	18.2367	0.00050655	0.00292278
ATS1	1.21761	2.94988	28.1615	5.61196e-05	0.000551964
CAALFM_C303510CA	-1.2174	5.14773	30.4451	3.63525e-05	0.000413433
TUS1	1.21212	8.39327	28.9514	3.32211e-05	0.000385812
CAALFM_CR06850CA	-1.21189	1.14079	10.5837	0.00463145	0.0161953
CAALFM_C301570WA	-1.20938	2.62738	11.4507	0.00348908	0.0131118
CAALFM_C402770CA	1.20847	5.10337	12.6312	0.00240954	0.00974629
CHS1	1.20763	3.79546	52.9926	1.2135e-06	3.39273e-05
THI13	-1.20385	2.24864	20.0875	0.000320909	0.00208833
CAALFM_C502370CA	1.20306	3.39419	51.9703	1.37933e-06	3.73534e-05
PMS1	1.20232	2.25139	11.9431	0.00298363	0.0116096
CAALFM_C502410CA	-1.20116	1.79041	22.4828	0.000184037	0.00135702
CAALFM_C603320WA	-1.20113	4.02666	58.8157	6.0555e-07	2.04297e-05
ZCF1	1.19998	8.84216	13.4989	0.00159313	0.00712584
CAALFM_CR09060WA	-1.19903	-0.731808	2.15672	0.160031	0.258404
CAALFM_C603110CA	-1.19797	1.91588	35.5676	1.47797e-05	0.000207726
OBPA	-1.19736	6.01459	37.3865	6.78286e-06	0.000117494
FTR2	-1.19714	5.34864	55.2261	9.23267e-07	2.71981e-05
CAALFM_C104200CA	-1.19591	3.31368	46.9329	2.67094e-06	6.01858e-05
CAALFM_C206430CA	1.19195	3.88465	16.7698	0.000741066	0.00390583
FRE7	-1.19048	7.71798	30.9748	2.21325e-05	0.000281386
DIT2	-1.18824	2.68868	33.4211	2.13031e-05	0.000274905
CAALFM_C111860WA	-1.18808	6.91263	35.0443	1.02728e-05	0.000161556
CAALFM_C401760WA	-1.18756	3.90594	11.9024	0.00302214	0.0117297
GCY1	1.18663	3.7213	19.112	0.000406924	0.00248224
PEA2	1.1862	5.87978	16.0992	0.000733811	0.00387706
CAALFM_C101140CA	1.18533	9.16994	27.0154	4.98429e-05	0.000508448
ECM21	1.18473	9.81043	18.255	0.000404189	0.00247305
CDC14	1.18424	3.9115	24.1679	0.000127093	0.00104141
ATO5	1.18354	1.77532	14.2071	0.00150713	0.00684328
CAALFM_C402040WA	1.1831	4.64407	41.5689	5.73919e-06	0.000106316
CAALFM_C401800WA	1.18077	2.55609	4.19968	0.0560312	0.114508
CLB4	-1.17611	2.99475	36.7307	1.22012e-05	0.00018188
CAALFM_C200860CA	-1.17538	2.4357	8.53022	0.00946324	0.0284746
CAALFM_C501410CA	-1.17516	5.26301	55.526	8.90584e-07	2.65527e-05
CAALFM_C202230CA	-1.17481	6.87299	6.53469	0.0203354	0.051658
CAALFM_C203460CA	1.17434	5.32996	36.9258	1.182e-05	0.000178453
CTR2	1.17412	5.08476	22.3928	0.000187799	0.00137803
CAALFM_CR02500WA	1.17289	3.79271	17.4349	0.000622294	0.00340731
CAALFM_CR02600WA	-1.17247	0.00623846	11.558	0.00337124	0.0127402
FZO1	1.17156	8.19051	38.0887	6.00983e-06	0.000109317
CAALFM_C207980WA	-1.17105	2.25811	23.7634	0.0001387	0.00111089
CAALFM_C702010CA	1.17079	6.48027	32.5473	2.48363e-05	0.000309889
CAALFM_CR10320WA	-1.17027	2.64326	4.1143	0.0583282	0.117886
HXK2	-1.16925	8.41532	18.5003	0.000378568	0.00236664
CAALFM_C305290CA	-1.16592	4.06009	8.44267	0.00977076	0.0291963
CAALFM_C208160CA	-1.16522	5.77403	39.949	7.33371e-06	0.00012371
CAALFM_C102290CA	-1.16508	2.83359	37.9901	6.11222e-06	0.000110184
CAALFM_C104940CA	-1.16318	1.61638	18.5295	0.000470469	0.00276916
MNN22	1.16313	5.75324	14.309	0.00146341	0.00672057
CAALFM_CR06170WA	-1.16313	3.08165	34.0751	1.90257e-05	0.000253061
CAALFM_C703650WA	-1.16267	2.01979	34.424	1.15024e-05	0.000174093
CAALFM_C305820WA	-1.16154	1.08976	3.57806	0.0737558	0.140553
BET2	-1.16062	2.85547	22.7846	0.000172021	0.00128728
CAALFM_CR02800CA	-1.15861	4.2705	24.2642	0.000124493	0.00102427
CAALFM_C113880CA	1.15786	10.4035	14.1935	0.0012867	0.00607535
TPO3	1.15777	6.80877	8.33707	0.009378	0.028331
CAALFM_C107040CA	1.15644	-0.653031	2.5119	0.131236	0.221502
CAALFM_C210600WA	1.15546	2.76314	16.6265	0.000769866	0.00403228
PUT1	1.15527	8.88483	5.02523	0.0370024	0.0826702
SFC1	1.15516	6.72882	10.2081	0.0052529	0.0178215
CAALFM_C403460CA	1.15484	4.68601	10.5467	0.00468886	0.0163487
VMA2	-1.15395	6.7335	35.7382	1.4366e-05	0.000203654
CAALFM_CR01920WA	1.15308	0.243692	15.3749	0.00108234	0.00526694
CAALFM_C503880CA	1.15025	1.84971	14.2489	0.00148902	0.00679074
CAALFM_C101890CA	1.14999	8.03547	32.7716	1.565e-05	0.000215778
ELA1	1.14823	4.62602	28.8577	4.90443e-05	0.000506288
CAALFM_C401430CA	-1.14699	2.65876	22.2023	0.000148484	0.00114814
GEF2	1.14662	7.49189	12.1294	0.00281426	0.0110791
ALK6	-1.14624	3.29878	22.6593	0.000176902	0.00131728
DPB4	-1.1453	2.14113	21.5914	0.000225379	0.00157896
ASH2	-1.14451	3.3932	43.6059	2.44198e-06	5.60728e-05
HMX1	1.14383	9.25756	10.0267	0.00504111	0.0172581
CAALFM_C109130WA	1.14357	8.54816	14.0454	0.00134607	0.00631617
CAALFM_C306750WA	-1.14286	2.97661	11.4316	0.00351057	0.0131761
CAALFM_C700940WA	1.1418	7.59816	44.4387	2.14682e-06	5.2067e-05
CAALFM_C208180CA	1.14048	4.67698	28.8096	4.94999e-05	0.0005077
PMI1	-1.14046	3.92079	66.1639	2.71132e-07	1.17796e-05
CAALFM_C702250WA	1.13935	1.04411	2.519	0.130728	0.220731
GPD2	1.13865	9.8511	10.4412	0.00435764	0.0155072
CDC54	-1.13833	4.94353	52.3371	6.8505e-07	2.25799e-05
YCF1	1.13803	8.65563	19.1825	0.000316296	0.00206987
VMA22	-1.13779	0.306208	18.0498	0.000531208	0.00303248
CAALFM_C202360CA	-1.13686	2.44247	22.3728	0.000188647	0.0013809
VMA4	-1.13657	5.42433	55.5192	8.91306e-07	2.65527e-05
HGT19	-1.13637	6.86926	10.9057	0.00416416	0.0150313
CAALFM_CR02210WA	1.13433	6.67839	23.3775	0.000150888	0.00116374
CAALFM_C111910WA	-1.13308	0.797154	9.36414	0.00702374	0.0224188
CAALFM_C701910CA	1.12859	4.97691	23.2984	0.000153532	0.00117728
IDP1	-1.128	4.67982	40.178	7.08081e-06	0.00012148
NCR1	-1.12751	6.9733	18.394	0.000486802	0.00284864
DAK2	-1.12627	4.44361	26.8993	7.20528e-05	0.000671492
CAALFM_C602560WA	-1.12601	4.78934	36.5183	1.26319e-05	0.000185216
CAALFM_C205960CA	1.12492	3.10843	5.17492	0.0360179	0.0810626
MET1	1.12404	6.77348	36.3475	1.29905e-05	0.000189491
PMT6	-1.12398	4.95173	61.5115	4.46979e-07	1.65602e-05
CAALFM_C300030CA	1.1238	5.18571	12.835	0.00226414	0.00929173
CAALFM_C600180CA	1.12136	1.42594	20.7304	0.000275409	0.00184799
SLY41	1.1204	7.70947	20.7824	0.000210272	0.00150633
CAALFM_C208340CA	1.12014	1.80372	7.14967	0.0159287	0.042526
CZF1	1.11956	5.60638	15.1823	0.00114202	0.00551693
AGO1	-1.11931	5.72198	28.3353	5.42523e-05	0.000537639
FAR1	1.11879	4.30976	29.7967	4.10306e-05	0.000448072
ALG2	-1.11834	3.42497	36.22	1.32657e-05	0.000191655
CAALFM_C111270WA	1.1182	9.5783	8.72085	0.00811199	0.0252127
CAALFM_C102780WA	-1.11804	3.6597	31.1235	3.20869e-05	0.000377725
COX19	1.11739	5.96671	25.1211	0.000103804	0.00089171
CAALFM_CR06820WA	-1.11735	3.69061	26.0762	8.51517e-05	0.000761824
GAC1	1.11697	9.95904	21.8144	0.000163081	0.00123259
FMP27	-1.1157	8.30594	57.3902	7.14196e-07	2.28203e-05
GUP1	-1.11542	1.9247	11.2449	0.00372831	0.0138215
ENA2	1.11409	10.4559	10.3346	0.00452302	0.0159361
CAALFM_CR01810CA	-1.11358	2.01817	12.5427	0.00247588	0.00996126
CAALFM_C301070CA	-1.11323	2.74605	10.1115	0.00542754	0.0182907
CAALFM_C306660CA	1.11086	0.788368	7.99893	0.0115141	0.0333141
COI1	1.11079	5.52615	5.82457	0.0272506	0.0646881
CAALFM_C701570CA	1.11019	2.9462	14.1927	0.00151344	0.00685726
VPS13	-1.10995	8.6242	26.0634	6.12485e-05	0.0005926
ROT2	-1.1082	5.63277	47.9495	2.32771e-06	5.44846e-05
AHR1	1.108	7.02446	18.2624	0.00050326	0.00290982
TFB3	1.10707	4.41958	5.83184	0.0271674	0.0645412
MTM1	1.10661	5.54143	28.7062	5.0495e-05	0.000511644
ISA2	1.10553	5.68443	17.7796	0.000569257	0.00319196
DUO1	-1.10469	1.0854	15.572	0.000854209	0.00439775
SAP10	1.10415	6.2452	36.7276	1.22072e-05	0.00018188
GTT12	1.10412	1.95486	10.6431	0.00454106	0.0159625
CAALFM_C603740WA	-1.10364	0.678957	14.9879	0.00120606	0.00574987
CAALFM_C307540CA	-1.10362	1.83357	15.9058	0.000935099	0.00470432
CAALFM_C111570WA	1.10143	2.52977	51.8536	1.39982e-06	3.76316e-05
CAALFM_C600760WA	-1.10128	5.15389	10.1478	0.00536121	0.0180974
ARC35	-1.10112	3.76926	7.79867	0.0124143	0.0352778
CAALFM_CR00710CA	-1.10102	0.836183	8.96257	0.00809639	0.0252031
SER1	-1.10043	4.6449	46.1206	2.98605e-06	6.48659e-05
INO1	1.10006	10.6289	3.91215	0.0624949	0.124516
HAT1	-1.09989	3.13169	39.8636	7.43052e-06	0.000124994
CAALFM_C305550CA	-1.09973	4.39964	23.3977	0.000150224	0.0011601
ESC4	-1.09769	0.818235	9.63547	0.00638991	0.0208883
DED1	1.09659	10.4557	19.5122	0.000290341	0.00193315
CAALFM_C105230WA	-1.09603	3.13576	43.3926	2.52461e-06	5.75324e-05
CAALFM_CR07500WA	1.09586	0.384626	4.508	0.0485657	0.102262
CAALFM_C600170CA	1.09583	7.21571	35.8213	1.4169e-05	0.000201334
ZCF8	1.09467	5.39729	24.2134	0.000125857	0.00103268
IPP1	-1.09428	6.88397	35.4673	9.51794e-06	0.000153277
CAALFM_C303670WA	1.09384	6.25422	13.2943	0.00197125	0.00835983
CAALFM_CR08260CA	-1.09381	-1.11012	1.17721	0.291384	0.409987
YKE2	-1.09319	4.63152	19.6493	0.000356741	0.00226298
BIO2	-1.09316	0.76954	13.7409	0.00172671	0.0075713
CAALFM_C200600CA	1.09263	5.74435	27.1469	4.84605e-05	0.000501978
GCN2	-1.09251	5.30862	47.6086	2.43698e-06	5.60728e-05
CAALFM_CR08420WA	1.09229	7.32672	11.314	0.00364606	0.0135833
FGR6-1	1.09185	2.96559	38.1923	9.64612e-06	0.000154517
CAALFM_C400990WA	1.09039	0.275385	3.81921	0.0654145	0.128971
NDT80	1.08948	8.04451	22.7596	0.000129977	0.00105502
SEC22	-1.08931	2.5969	22.0162	0.000204506	0.00147376
CAALFM_C204450WA	1.08891	1.86921	7.47918	0.0140205	0.0386444
CAALFM_C111800CA	-1.08855	0.0595078	2.76578	0.114446	0.19889
HRT2	-1.08817	3.28381	55.8526	8.56447e-07	2.59904e-05
CAALFM_C703580CA	1.08686	5.58838	28.8999	3.35745e-05	0.000388422
CAALFM_C103150CA	-1.086	4.57088	33.62	2.05797e-05	0.000267271
IPL1	1.08592	3.50812	11.8616	0.00306124	0.0117901
TAL1	1.0844	8.46572	14.4323	0.00119692	0.00572306
SSA2	1.08273	9.99024	5.9758	0.0243321	0.0593922
CAALFM_C202750CA	1.08227	1.89988	12.0747	0.00286286	0.0112338
TAC1	1.08221	7.5301	32.2473	1.72928e-05	0.00023415
CAALFM_C205640WA	1.0821	6.84258	23.5527	0.000107894	0.000920303
CAALFM_C305460WA	1.082	5.81772	20.8378	0.000207386	0.00148741
CAALFM_C406160WA	1.08162	3.28559	23.6894	0.000140949	0.00111852
CAALFM_C503840WA	-1.08059	1.71837	16.2981	0.000840711	0.00434679
CAK1	-1.08047	3.05597	16.1582	0.000873099	0.00447213
CAALFM_C112690CA	-1.07996	-0.108552	5.28109	0.0343858	0.0780662
IFG3	1.07932	6.45313	7.29532	0.0140867	0.0387699
CAALFM_C400700CA	1.07925	4.69851	15.0637	0.00118063	0.00566309
CAALFM_C105830WA	1.07605	0.294095	4.23435	0.0551284	0.112931
RFG1	-1.07591	7.93163	26.5688	5.48713e-05	0.000540567
CAALFM_C600240CA	-1.07557	2.78209	23.0515	0.000162126	0.00122691
CAALFM_C209780CA	-1.07553	4.14347	21.1425	0.000250063	0.00170895
CAALFM_C405580CA	-1.07552	6.11693	3.17937	0.0922627	0.167824
CAALFM_C201660CA	-1.07455	4.16262	21.1771	0.000248055	0.00169842
CAALFM_C404560CA	1.07346	6.59915	40.6491	6.59069e-06	0.000115366
CAALFM_C600560WA	-1.07335	4.91025	58.8357	6.04163e-07	2.04297e-05
CAALFM_CR04820WA	1.07328	9.39516	10.5418	0.00420783	0.0151524
CAALFM_CR00890CA	-1.07327	1.13124	22.1669	0.000197628	0.00143274
GCV2	1.0726	7.91248	10.4215	0.00438772	0.0155983
LYS12	-1.07239	5.2657	42.4086	5.06804e-06	9.79003e-05
CAALFM_C209670CA	1.07186	5.83826	43.909	4.07617e-06	8.48827e-05
CAALFM_CR03180WA	1.07121	4.45878	26.3216	8.09875e-05	0.000732161
CPH1	1.0697	4.44006	46.6704	2.7685e-06	6.19221e-05
CAALFM_C206890CA	1.0693	4.29395	7.13687	0.0160086	0.042694
CAALFM_C105950CA	-1.06894	5.29182	13.5009	0.00185362	0.00796728
SOD6	1.06868	5.5479	25.5937	9.40592e-05	0.000823222
CAALFM_C307370WA	1.06737	6.11971	27.8468	4.17842e-05	0.000453839
AOX1	1.06725	5.61164	10.0953	0.00545758	0.0183758
PLB3	1.06659	9.56477	23.9672	9.80316e-05	0.000853044
HIP1	1.06508	7.86345	45.8748	1.72608e-06	4.41686e-05
CAALFM_CR02060WA	1.06489	4.14359	27.412	6.50388e-05	0.000621471
MNN4-4	1.06425	4.5778	10.6609	0.00451423	0.0159299
CAALFM_C504390CA	1.06421	-0.349361	5.0098	0.0387362	0.0858766
GYP5	1.06243	6.79739	28.4586	5.29693e-05	0.000528873
SPO11	1.06221	4.21234	21.0133	0.000257716	0.00175067
CAALFM_C204000CA	1.06219	1.01592	1.91607	0.184021	0.288052
HEM3	1.06197	8.02045	15.7653	0.000807692	0.0042085
YMC1	-1.06187	4.03069	35.327	1.53861e-05	0.000213315
MODF	-1.06142	3.45832	48.3246	2.21375e-06	5.26331e-05
ERP5	-1.06079	4.27457	26.929	7.16235e-05	0.000670596
DDR48	-1.05923	8.88722	11.7452	0.00279775	0.0110357
CAALFM_C500920WA	-1.05921	2.42079	30.0495	3.9131e-05	0.000435601
CAALFM_C205980CA	1.05707	6.69885	11.0736	0.00394163	0.0144479
CAALFM_C700420CA	-1.0569	4.41467	31.5643	2.96165e-05	0.000356283
CAALFM_C504380CA	1.05658	3.15356	10.8891	0.00418686	0.0151042
PGA37	1.05631	3.87175	5.20394	0.0355631	0.0802862
RPM2	1.05615	8.84321	15.8115	0.000796986	0.00416349
CAALFM_C603800CA	1.05505	7.25475	13.0853	0.00181365	0.00783196
ILV5	-1.05444	7.31165	28.5288	3.62438e-05	0.000412974
TRY6	1.0543	6.3752	14.5302	0.00137335	0.00639452
CDC28	-1.05375	3.04099	49.8073	1.82049e-06	4.58082e-05
MCD4	-1.05319	3.6994	17.811	0.00056468	0.00317514
DIT1	-1.05266	2.93816	35.5679	1.47791e-05	0.000207726
CAALFM_C207420WA	-1.05231	4.4549	30.9999	3.28209e-05	0.000383683
CAALFM_C210200WA	-1.05197	1.7617	9.40147	0.00693247	0.0221861
MRV8	-1.05136	1.29571	11.7795	0.00314178	0.012016
CHL4	1.05079	1.34587	15.6571	0.00100106	0.00496215
CAALFM_C209860CA	1.0505	3.3479	15.6275	0.00100925	0.00498761
PMC1	1.04864	11.7388	5.55996	0.0291454	0.068247
CAALFM_C103430WA	-1.04845	4.01313	23.2901	0.000153812	0.00117728
CIRT4B	-1.04832	4.72403	19.6773	0.000354315	0.00225017
CAALFM_C201440CA	-1.04792	2.43864	41.1957	6.06892e-06	0.000110061
CAALFM_C303230CA	1.04719	5.02739	25.8645	8.89386e-05	0.000788693
CAALFM_C111120CA	-1.04713	4.7578	35.5109	1.49202e-05	0.000208573
DPM3	-1.04621	2.82078	25.2559	0.000100913	0.000871836
KRE1	1.04195	5.16541	9.28109	0.00723172	0.0229733
CAALFM_C300170CA	-1.04192	4.86171	31.7036	2.88801e-05	0.000348747
RFX1	1.04181	6.23954	44.1838	2.23275e-06	5.28768e-05
SAP8	1.04153	1.39022	18.5133	0.000472394	0.00277508
SAP3	1.04034	2.61015	10.6865	0.00447609	0.015854
SAP9	1.03986	11.429	11.6968	0.00284301	0.011185
tP(UGG)1	1.03896	-0.677942	1.66167	0.214477	0.324754
TIM12	-1.03805	2.3391	28.4668	5.28854e-05	0.000528873
CAALFM_C502680WA	1.03785	5.63549	16.3086	0.000838341	0.00433825
IFF4	1.03773	6.19072	32.1315	1.76809e-05	0.000238523
CAALFM_C204330CA	-1.03615	4.21838	40.4529	6.79009e-06	0.000117494
CAALFM_C203710WA	1.03348	2.20261	6.13971	0.0238954	0.0586842
CAALFM_CR10130WA	-1.0328	3.13723	16.463	0.000661722	0.00357557
CAALFM_C102060WA	-1.03246	3.13092	18.1992	0.000511392	0.00294404
GVP36	-1.03226	5.05356	36.0137	1.3725e-05	0.000196501
CAALFM_C407240WA	1.03064	-0.464835	2.53303	0.12973	0.219328
CAALFM_CR08990CA	1.02852	10.8706	10.2889	0.00459604	0.0161182
POL30	-1.02548	3.35835	27.7087	6.13305e-05	0.0005926
AQY1	-1.02471	7.96092	34.1749	1.20412e-05	0.000180438
SNG3	-1.02419	3.88892	38.9614	5.18171e-06	9.93408e-05
CAALFM_C103100WA	-1.0238	7.46541	24.251	9.18567e-05	0.000805113
NUP82	-1.02266	5.25357	29.6851	4.19019e-05	0.000454301
ATO9	-1.02186	0.458642	6.32835	0.0221134	0.0551391
CAALFM_C201930CA	-1.02167	4.11099	11.8759	0.00304753	0.0117523
CAALFM_C403710CA	1.02027	4.94621	29.916	2.73137e-05	0.000335941
RIB5	-1.01971	5.47843	31.2061	3.16071e-05	0.000374293
CAALFM_C501300CA	-1.01922	1.63399	7.58388	0.0134695	0.0374168
RTT109	-1.01815	1.92986	20.445	0.00029465	0.00195196
CAALFM_CR05890CA	-1.0175	4.44594	64.636	3.18487e-07	1.29714e-05
CAALFM_C601120CA	-1.01427	1.30407	12.1342	0.00281011	0.01107
BMT1	-1.01369	6.13755	12.4453	0.00222495	0.00917794
CAALFM_C106160WA	1.01341	0.908389	8.25801	0.0104572	0.0308504
KRE5	-1.01223	5.5161	10.9212	0.00414303	0.0149729
KRE9	1.01021	7.31124	17.4483	0.000620136	0.00340145
SPL1	1.00974	8.06134	24.546	8.58881e-05	0.000766143
ATM1	1.00964	5.72654	16.0047	0.000910228	0.0046076
MNS1	-1.00895	4.72367	28.4712	5.28404e-05	0.000528873
FRE30	-1.00891	7.12869	23.1786	0.000117747	0.000976749
CAALFM_C207640WA	1.00867	7.50148	24.3544	8.97133e-05	0.000793234
THR1	-1.00849	3.90297	48.5882	2.13741e-06	5.2067e-05
RSN1	1.00848	7.23039	25.6218	6.74971e-05	0.000641913
HAC1	1.00721	8.27167	19.3084	0.000306097	0.00201584
MIS11	-1.00703	6.62606	27.4711	4.52315e-05	0.00047975
PGA25	-1.00694	6.39735	14.8009	0.0012715	0.006013
HGT2	-1.00678	10.0052	12.2192	0.00239424	0.00969739
TEF4	1.00624	1.48108	7.13058	0.0160481	0.04275
CAALFM_C206620WA	-1.00496	1.19309	12.339	0.00263655	0.0105162
CAALFM_C307840CA	1.00422	3.58677	1.25665	0.277722	0.396304
CAALFM_C600210WA	1.00419	3.93419	42.4016	5.07326e-06	9.79003e-05
TOS1	1.00281	6.30269	30.8612	3.36661e-05	0.000388738
RAD2	1.0028	5.64025	30.9955	3.28472e-05	0.000383683
CAALFM_C109840CA	1.00241	5.9296	43.0929	4.58567e-06	9.25934e-05
TPS1	-1.00232	6.42057	27.6538	6.19984e-05	0.000597143
CAALFM_C701710WA	-1.00185	4.75567	29.2917	4.51411e-05	0.00047975
MAE1	-1.00156	5.31722	20.4354	0.000229393	0.00160151
MEC1	-1.00136	6.11564	31.5325	2.97871e-05	0.000356913
CAALFM_C303370CA	1.00094	7.5533	10.179	0.00530496	0.0179276
PHR1	0.999849	9.75226	9.65608	0.00575449	0.0192157
IPK2	0.999599	4.60568	25.5779	6.81562e-05	0.000647163
TFS1	-0.999256	6.20424	16.79	0.000737109	0.00389109
CAALFM_C111620WA	0.998885	2.94495	16.4134	0.000671071	0.00361194
CDA2	-0.998617	1.6943	17.4527	0.000619424	0.00340064
CAALFM_CR02440WA	0.997866	1.69953	17.5966	0.000596753	0.0033032
CAALFM_C503120WA	-0.997374	1.42522	9.70531	0.00623737	0.0205013
PEL1	0.995715	5.48248	24.4641	8.75004e-05	0.000778225
MFG1	0.995614	6.02765	38.2378	5.85855e-06	0.000107537
CAALFM_C112540WA	-0.99547	1.83502	7.93736	0.0109367	0.0319838
CAALFM_C107650WA	-0.995288	3.8784	13.3124	0.00196066	0.0083266
CAALFM_C106840CA	0.995158	5.24669	10.4425	0.00485477	0.016769
CAALFM_C306350WA	0.993328	5.2032	12.7734	0.00230699	0.00940075
QDR1	0.993286	5.33965	5.26778	0.0345858	0.0784023
CAALFM_C206980WA	0.992604	-0.0258433	3.86089	0.0658185	0.129641
CAALFM_C504300CA	-0.990969	6.65427	57.5211	7.03356e-07	2.25935e-05
CAALFM_C103240WA	-0.990554	3.69243	37.8381	1.02054e-05	0.000160914
COQ3	-0.990123	3.60566	47.0119	2.64232e-06	5.9764e-05
PTH2	0.989715	3.98455	21.394	0.000235879	0.00163357
CAALFM_C303560WA	-0.987968	4.00084	22.6696	0.000176495	0.00131587
CAALFM_C404300CA	0.987193	3.68361	13.4885	0.00186043	0.00798518
NTF2	-0.987117	4.98447	59.2964	5.73183e-07	1.96454e-05
DUT1	-0.986877	1.93265	14.0618	0.00157202	0.00706359
CAALFM_C303690WA	0.985381	2.82469	16.614	0.000772438	0.00404225
EAF3	0.985272	4.05613	19.3185	0.000386755	0.0023955
RPS27A	0.985183	1.94248	1.95697	0.179644	0.282886
SER2	-0.985158	3.48875	28.117	5.66087e-05	0.000555748
RFX2	0.984991	5.0558	41.5464	5.75845e-06	0.000106346
CAALFM_CR09920WA	0.983915	10.8568	18.6651	0.000362366	0.00229384
CAALFM_C201740CA	-0.983865	2.87161	8.80094	0.00857944	0.0264074
CAALFM_C201530CA	0.982878	6.88458	30.1324	3.85299e-05	0.000431692
CAALFM_C501590WA	-0.98236	2.40422	10.1924	0.00528096	0.0178665
OFR1	-0.982133	4.91292	27.983	5.8112e-05	0.000565118
PEX5	0.98201	7.82574	23.2046	0.00011703	0.000972139
RAM2	-0.98181	3.62183	36.3272	1.30339e-05	0.000189666
ZCF30	0.981552	6.47913	28.1786	3.89793e-05	0.000435112
GZF3	0.979723	7.76149	17.3909	0.000510966	0.00294404
CAALFM_C405900CA	0.979653	8.08706	8.91844	0.00753561	0.0237513
CAALFM_C501420WA	-0.979642	4.93438	19.1999	0.000398204	0.00244386
PAN6	0.978892	5.71696	14.4568	0.00140254	0.00651032
MCM2	-0.978145	5.37316	42.8542	4.74783e-06	9.4007e-05
RTG1	-0.978112	4.38339	28.7901	4.96855e-05	0.0005077
CAALFM_C402330CA	0.977921	3.01543	22.6381	0.000177741	0.00132027
CRL1	0.975368	6.1619	21.0644	0.000254656	0.00173574
PGA13	0.975113	4.74878	4.5942	0.0451171	0.0964814
CAALFM_C306680CA	0.975019	3.34917	8.53891	0.00868661	0.0266557
LPT1	-0.974669	4.34913	30.0294	3.92783e-05	0.000435601
CAALFM_C111680CA	0.97436	1.80163	8.24306	0.0105151	0.030991
CAALFM_C103990WA	0.974125	4.93386	6.78589	0.0183864	0.047645
STP2	0.973756	9.05798	12.3869	0.00226736	0.00929173
CAALFM_CR05500CA	-0.973625	3.86127	24.1074	0.000128758	0.00104935
YCP4	0.973562	7.14379	38.4696	5.63161e-06	0.000105235
CUP2	0.973144	6.84347	30.978	3.29526e-05	0.000383982
HSE1	0.972374	6.65601	43.4594	2.49839e-06	5.71506e-05
CAALFM_C602790CA	0.972275	7.7151	21.7407	0.000217779	0.00154739
CAALFM_C604420WA	0.971474	3.92484	14.3745	0.00143609	0.00663546
CAALFM_C201420CA	-0.971267	2.51592	33.8591	1.97462e-05	0.000258111
CDC47	-0.969467	5.17165	37.3426	1.10493e-05	0.000170536
CAALFM_C700040CA	0.969444	1.07452	13.9461	0.00162594	0.00723053
CAALFM_CR09090CA	0.969038	3.37404	6.76728	0.0185233	0.0479477
EGD1	-0.968442	6.35844	39.9201	4.41452e-06	9.00651e-05
CAALFM_C112000CA	-0.968154	-0.725683	2.47258	0.134095	0.225326
CAALFM_C207910CA	-0.968117	0.744817	18.1918	0.000512351	0.00294675
CAALFM_C202050CA	0.967914	3.04111	4.86459	0.0413229	0.0902527
CAALFM_C406040WA	0.967665	3.58942	38.1045	9.78153e-06	0.000155449
CAALFM_C402740WA	0.96732	9.32192	12.9598	0.00188712	0.0080825
RGT1	0.966311	6.65556	18.7148	0.000449125	0.00267482
STB3	0.965954	8.15642	10.3561	0.00448913	0.0158901
CAALFM_C503400CA	-0.965255	2.20693	21.9725	0.000206552	0.00148319
BUD20	0.964831	-0.239259	3.91639	0.0640866	0.126933
CAALFM_C405310WA	-0.96429	1.49389	5.9535	0.0258168	0.0621393
CAALFM_C600660CA	-0.962991	2.30244	22.4407	0.000185788	0.00136826
CAALFM_CR06500CA	-0.962843	3.76726	4.16631	0.056916	0.11569
CPR3	-0.96207	6.11332	29.8848	4.03572e-05	0.000442318
AMS1	-0.961937	7.83257	25.559	6.84423e-05	0.000648859
CAALFM_C300960WA	-0.961847	3.30307	13.2277	0.00201099	0.0084985
CAALFM_C502400WA	-0.961737	4.81066	34.7808	1.07765e-05	0.000168163
CAALFM_C206570CA	-0.961734	5.93143	13.7234	0.00173563	0.00760076
HOF1	0.961164	2.74429	15.1175	0.00116296	0.00559164
CAALFM_C208890WA	0.960637	0.721889	5.70127	0.0287074	0.0674044
PMM1	-0.959931	3.42946	7.04305	0.0166081	0.0439318
CAALFM_C402200CA	-0.95932	2.35546	6.51483	0.0204992	0.0519928
ARC19	-0.958929	1.98298	6.09503	0.0243411	0.0593922
CAALFM_C405340WA	-0.958323	3.03229	23.257	0.000115604	0.000965602
CAALFM_CR00690CA	-0.958105	3.3382	24.0209	0.000131182	0.00105992
tS(AGA)4	-0.95801	0.154043	6.33985	0.0220098	0.0549471
XKS1	-0.956432	5.09864	42.9134	4.70707e-06	9.38151e-05
RTA2	0.955523	8.46356	13.0875	0.00181243	0.00783196
MAD2	-0.955403	2.50588	23.5874	0.000144119	0.00113472
HAP42	0.954718	7.239	26.9209	7.17404e-05	0.00067065
CAALFM_C502850WA	-0.954442	3.62652	39.9571	7.32451e-06	0.00012371
GTT13	-0.954385	3.89328	6.82533	0.0181001	0.0470744
AMO1	0.953918	5.2481	25.7954	9.02139e-05	0.000794172
SMM1	0.952369	6.20383	13.0447	0.00212476	0.00884928
CAALFM_CR10260WA	0.951897	4.02088	16.077	0.00089251	0.00453693
CAALFM_C300850CA	-0.950986	7.98329	19.3672	0.00030146	0.00198746
PSF1	-0.950969	1.5293	8.72423	0.00882002	0.0269828
CAALFM_C601360WA	0.950837	3.11704	3.19877	0.0913539	0.166522
HGT3	-0.95074	2.63058	21.4409	0.000233334	0.00162153
CAALFM_C101050CA	-0.950213	4.85311	29.7475	4.14117e-05	0.000451418
AGC1	0.949491	7.89594	6.55131	0.0201995	0.0514269
CAALFM_C303190CA	0.948186	5.01631	24.7057	0.00011331	0.000953038
CAALFM_CR00010CA	-0.948181	5.36973	26.1184	8.44184e-05	0.000757508
PIM1	0.947109	7.98385	22.0947	0.000152381	0.00117376
CAALFM_C505260WA	-0.946487	1.8294	20.4431	0.000294782	0.00195196
AFP99	0.946116	4.35971	13.1231	0.00207516	0.00868461
HEM14	-0.945024	3.7522	23.7341	0.000139586	0.00111503
CAALFM_C105920WA	0.945012	4.06874	10.5496	0.00419644	0.0151207
CAALFM_C202930CA	-0.944527	5.43996	25.0648	0.000105039	0.000898485
CAALFM_CR03020CA	0.944373	2.66129	18.8977	0.000429114	0.00258625
CCC1	-0.943853	6.27578	13.6093	0.00179506	0.00779321
ARP9	-0.943557	4.06707	19.4572	0.000373843	0.0023517
FMO2	0.943333	3.78559	10.7208	0.00442564	0.015703
LYS143	0.943	5.22346	21.1408	0.000250159	0.00170895
CAALFM_C700920CA	-0.941455	2.74538	5.70617	0.0286479	0.067317
CAALFM_CR07350WA	-0.941111	5.23553	21.2224	0.000188517	0.0013809
CAALFM_C107010WA	0.940385	2.37456	32.8056	2.37282e-05	0.000298531
CAALFM_CR10040WA	-0.939843	2.29756	23.5627	0.000144897	0.00113803
CAALFM_C207650CA	-0.939185	3.94572	28.0309	5.75703e-05	0.000560753
ADE12	-0.938377	7.89765	22.2322	0.000147417	0.00114428
RHR2	0.938	9.3789	5.39154	0.0313949	0.0725508
SSY1	0.935395	6.19503	32.9641	2.30755e-05	0.000291533
CAALFM_CR06140WA	0.935253	8.96929	15.6551	0.00100163	0.00496215
PGA34	0.934506	-0.645939	2.74017	0.114135	0.198464
CAALFM_CR01380WA	-0.934253	5.14352	57.542	7.0165e-07	2.25935e-05
VMA8	-0.934131	3.80485	20.714	0.000276474	0.00185103
CAALFM_C401660WA	-0.933542	5.27407	50.3552	1.69547e-06	4.37561e-05
RIM8	0.933459	6.6379	33.2962	2.1772e-05	0.000277973
CAALFM_CR06190CA	0.933331	-0.635126	0.568485	0.461078	0.575538
TKL1	0.932405	8.75406	10.9347	0.00367516	0.0136665
CAALFM_C210540WA	0.931233	5.7343	29.1495	3.19016e-05	0.000376277
HST6	0.930354	2.37897	6.09683	0.0243229	0.0593922
CAALFM_C703840WA	-0.930257	4.59188	25.4337	7.03714e-05	0.000660922
LCB4	0.93012	4.98231	15.0924	0.00117115	0.00562656
CAALFM_CR09810WA	-0.929294	1.16776	8.96513	0.00808898	0.0251931
GPX1	0.928702	2.32375	7.72023	0.0127884	0.0361222
SYS3	0.928394	5.18597	24.2197	0.000125687	0.00103268
CAALFM_CR03000CA	-0.927465	3.72051	15.2323	0.00112618	0.00544954
CAALFM_C601590WA	0.927436	7.86027	24.2717	0.000124293	0.00102402
CAALFM_C401990WA	0.927022	2.22722	13.2418	0.00200247	0.00847434
BCR1	0.926483	8.3724	15.515	0.000868493	0.00445232
KIP1	0.925986	3.70317	23.588	0.000144098	0.00113472
SHM2	-0.925089	7.04513	13.7013	0.00149619	0.00680895
CAALFM_C703480WA	0.925058	8.3247	17.0966	0.00055419	0.00313073
tS(GCU)1	0.924976	-0.459791	2.58992	0.125778	0.21434
CAALFM_CR04020CA	-0.924577	3.53417	43.0352	4.62427e-06	9.27774e-05
CAALFM_C200280CA	0.921922	3.89756	31.2315	3.14609e-05	0.000374001
CAALFM_C209560CA	-0.920716	3.62713	23.8923	0.000134879	0.00108605
ERV25	-0.92044	4.42516	7.92807	0.0118239	0.0339859
CAALFM_CR02510WA	0.920372	8.54907	24.7755	8.15427e-05	0.000733884
MSS4	0.920286	7.86526	20.7853	0.000271871	0.00182832
CAALFM_C400060WA	0.920022	3.61303	32.345	2.5745e-05	0.000319248
CNT	-0.919565	8.8423	23.5247	0.000108599	0.000922407
CAALFM_C501230CA	-0.91952	5.12624	46.1952	2.95541e-06	6.47807e-05
CAALFM_C403170WA	-0.919203	3.04874	37.1184	1.14566e-05	0.000173835
CAALFM_C302670WA	0.919052	2.86598	15.5817	0.000851808	0.00438914
CAALFM_C306940WA	-0.919032	8.48764	11.1192	0.00345136	0.0129943
CAALFM_C504140WA	-0.918653	-0.458367	2.97645	0.102438	0.183019
CAALFM_C305080WA	0.918326	2.21609	8.33992	0.0101462	0.0301539
CAALFM_CR08440WA	0.918095	4.0163	17.7061	0.000580119	0.00324083
CAALFM_C208830WA	0.917705	7.16316	59.9143	5.34378e-07	1.86538e-05
ERG9	-0.915562	4.58424	11.5067	0.00302894	0.0117297
ATF1	0.915481	7.72174	15.0995	0.000980951	0.00488776
WHI3	0.91483	7.32209	29.8301	4.07734e-05	0.000446069
UGA1	0.914518	10.9624	3.9113	0.062521	0.124527
RDI1	-0.914417	5.41193	14.0351	0.00135033	0.00633126
CAALFM_CR09670CA	-0.91438	4.95437	19.2991	0.000388603	0.00240202
CAALFM_C302360CA	-0.913469	1.92523	6.4804	0.0207869	0.0525459
CAALFM_CR07600WA	-0.912995	5.57194	60.7501	4.86471e-07	1.74869e-05
CAALFM_CR01070WA	-0.912639	1.55949	9.02926	0.00790609	0.0247383
CAALFM_C100190CA	0.912421	4.70903	14.9922	0.0012046	0.00574987
CAALFM_C107820WA	-0.912132	3.18238	26.2957	8.14147e-05	0.000733884
CAALFM_C112150CA	0.912022	3.29547	23.4921	0.00014715	0.00114428
GLO2	-0.911668	4.30486	26.3799	8.00316e-05	0.000726783
CAALFM_C407220CA	0.911345	6.29792	17.3882	0.000629908	0.00343633
CAALFM_C202580WA	0.911031	6.64735	20.0138	0.000255266	0.00173794
CAALFM_C501040WA	0.910998	1.24922	11.0051	0.00403074	0.0147168
CAALFM_CR10810CA	0.910178	6.3516	11.97	0.00295851	0.0115416
CAALFM_C505020CA	-0.910074	4.41351	18.4042	0.000485544	0.00284403
CAALFM_C204620WA	0.909246	7.07881	27.2455	4.74521e-05	0.000496015
MEU1	-0.908156	4.33099	31.923	2.7762e-05	0.000338856
APT1	-0.907333	3.96221	26.3425	8.06434e-05	0.000730143
RLM1	0.907164	5.34034	23.2426	0.000115994	0.000966187
CAALFM_C402820WA	0.90686	0.557631	5.79241	0.0276223	0.0654931
CAALFM_C502520WA	-0.906011	1.22596	10.042	0.00555743	0.0186452
SPE3	-0.905656	5.84148	22.294	0.000145247	0.00113803
CAALFM_C114020WA	0.904638	3.18331	9.04029	0.00787511	0.0246669
CHC1	-0.904243	8.59433	29.1889	3.16456e-05	0.000374293
ILV1	-0.903664	5.6498	66.2685	2.68189e-07	1.17796e-05
LAP41	-0.903516	5.0334	13.9506	0.00162381	0.00723053
CAALFM_C203170WA	0.902885	2.81045	9.91728	0.005799	0.0193389
RAD51	0.90282	4.93829	17.6374	0.000590497	0.00328362
CAALFM_C504940WA	-0.902654	2.6388	6.96369	0.0171351	0.0450301
DOT4	0.901466	7.2848	12.3903	0.00226487	0.00929173
CAALFM_C503100CA	-0.901466	2.69613	22.1866	0.000196748	0.0014298
CAALFM_C500380WA	0.901076	4.15354	41.4336	5.85636e-06	0.000107537
WSC2	0.900095	6.55174	21.683	0.000220683	0.00156062
CAALFM_C405440CA	0.899655	5.23669	18.6928	0.000451604	0.00267902
CAALFM_C203360WA	-0.897696	6.711	27.7667	4.24941e-05	0.000459073
tR(ACG)2	0.897524	-0.460086	6.34804	0.0219364	0.0548092
CAALFM_C302330CA	-0.896651	0.821827	4.17892	0.0549139	0.11253
IFF8	0.896229	2.38164	8.3346	0.0093868	0.0283434
ALG6	-0.895503	3.42274	13.5184	0.00184401	0.00793728
CAALFM_C206950CA	-0.894187	3.02491	43.5269	4.30641e-06	8.84571e-05
CAALFM_C304100WA	-0.894095	0.884127	4.06141	0.0598059	0.120389
YTH1	0.893791	6.42049	21.6292	0.000223424	0.00157073
CAALFM_C108770WA	0.89371	5.64207	7.95783	0.0116927	0.0337211
PBR1	0.893687	1.74524	3.77863	0.0684869	0.133589
CAALFM_C200540WA	0.893234	6.50845	28.421	3.70623e-05	0.000419137
CAALFM_C208920WA	0.891757	8.73464	13.2108	0.00174335	0.00761799
FLC1	0.891339	9.57694	11.1459	0.00342022	0.0128931
CAALFM_C200060CA	0.890504	2.03901	9.73713	0.00616925	0.020303
CAALFM_C100820WA	-0.890467	1.44453	3.75727	0.0692003	0.134663
CRH12	-0.890393	5.9039	19.1581	0.000318321	0.00207596
RNR21	-0.889323	7.49889	32.9997	1.49898e-05	0.000209061
CYC3	0.888887	7.07246	38.453	9.25645e-06	0.000150928
CAALFM_C503080CA	0.888785	5.53507	5.8807	0.0266155	0.0635551
GLC3	-0.886664	6.14527	13.1248	0.00207407	0.00868461
CAALFM_CR00820CA	-0.886155	2.66922	34.4992	1.76947e-05	0.000238523
CAALFM_C406410WA	-0.885419	3.69186	11.8859	0.00303788	0.0117413
SEC8	-0.885315	5.51897	19.9964	0.000328016	0.00211633
CAALFM_C306640WA	-0.883566	2.1106	4.56978	0.0472121	0.0999349
VTC3	-0.883507	5.96241	43.6229	4.24724e-06	8.75395e-05
CAALFM_C603540WA	0.883397	5.41141	7.4508	0.0141743	0.0388961
YPD1	0.883013	6.13094	25.0895	0.000104495	0.000896371
ZCF3	0.882975	6.685	20.2255	0.000310472	0.00203798
CAALFM_C107510WA	-0.880739	3.42756	29.9712	3.97087e-05	0.000438086
CAALFM_C101210WA	0.879179	5.81974	38.8299	8.72382e-06	0.000144337
CAALFM_C404440WA	-0.877703	4.22497	31.6853	1.92689e-05	0.000255186
CAALFM_C208660CA	0.876867	4.41163	17.1534	0.00066975	0.00360927
TEF2	-0.876294	10.9412	8.23992	0.00973256	0.0291253
MIH1	0.875792	7.92065	9.0771	0.00710583	0.0226631
CAALFM_C304350CA	0.87506	2.95616	12.1915	0.0027603	0.0109302
ARC18	-0.874339	1.47509	2.04776	0.170381	0.270914
POT1-2	0.874082	5.07071	5.89539	0.026452	0.0632899
CAALFM_CR02300CA	0.873564	7.87762	21.1253	0.000193098	0.00140665
ULP1	-0.873232	3.81739	17.9709	0.000436287	0.00262424
ZCF21	0.872525	7.103	17.3828	0.000630787	0.00343802
VMA7	-0.872051	3.00338	20.0386	0.000324703	0.00210847
CAALFM_CR01510CA	0.871639	0.864004	3.06752	0.0958573	0.173104
SUT1	0.871173	6.94412	7.74183	0.0118033	0.033943
CAALFM_C301800CA	0.869444	5.74634	26.8366	7.2967e-05	0.000678964
ALS1	0.868998	14.2555	8.09077	0.0103065	0.0305251
CWH8	-0.868378	3.56353	20.248	0.000308808	0.00202926
CAALFM_C502380WA	-0.868214	7.83543	27.2895	6.66427e-05	0.000634788
CAALFM_C208700CA	0.868161	6.03688	27.7091	6.13262e-05	0.0005926
CAALFM_C205040CA	0.867117	5.91724	29.8497	2.76801e-05	0.000338856
CAALFM_C110710CA	0.866513	2.49054	16.1227	0.000881527	0.00449854
HRQ2	0.86649	6.56316	5.91402	0.0249867	0.0606734
CAALFM_C100090WA	0.866382	0.752466	7.30524	0.0149934	0.0406032
CAALFM_CR09800CA	0.866326	6.00617	19.2251	0.000312803	0.00205105
ARG1	0.866251	9.20689	10.4887	0.00428611	0.0153249
LEU2	-0.864455	4.22893	15.3512	0.000911019	0.00460774
CAALFM_CR02900WA	0.863912	-0.103544	2.15223	0.160442	0.258998
FGR38	-0.863878	3.90873	21.3703	0.000237178	0.00164068
PSF2	-0.862335	1.94397	9.19375	0.00745796	0.0235802
SAM35	0.862316	4.21499	20.5238	0.000289193	0.00192763
ADE1	-0.862201	5.29994	23.0951	0.000120078	0.000992001
SNM1	0.862016	4.50843	23.5562	0.000145103	0.00113803
CAALFM_CR01320CA	-0.861737	4.76974	36.2513	1.31975e-05	0.000191126
CAALFM_C112650CA	-0.861561	3.38457	5.77627	0.0278109	0.065837
VID21	0.861519	5.56932	36.0185	1.3714e-05	0.000196501
CAALFM_C200890WA	-0.859942	0.550593	8.40308	0.00991353	0.0295643
CAALFM_C304130WA	-0.858299	5.05613	5.70682	0.02864	0.067317
CLG1	0.85776	10.0104	25.2444	7.34002e-05	0.000680897
NUP159	-0.856659	6.02961	14.578	0.00114561	0.00552143
CAALFM_C403050CA	-0.856641	7.25884	10.9991	0.00403871	0.014737
CAALFM_C101490WA	-0.856573	7.63176	27.078	4.91794e-05	0.000506817
LHS1	-0.856202	6.32779	32.9504	2.3131e-05	0.000291625
CAALFM_C102700CA	-0.85523	6.57706	2.33264	0.14302	0.23714
CAALFM_C604280WA	-0.855188	4.72649	30.8101	3.39841e-05	0.000390915
SPC3	-0.854993	2.74644	8.97908	0.00804881	0.0250938
RDN18	-0.854782	17.9342	1.26098	0.275334	0.394027
CRH11	0.854671	5.15309	6.01019	0.0252138	0.0610039
CAALFM_C601380CA	-0.854216	2.38702	4.59566	0.0466579	0.0991016
CAALFM_C205810WA	0.854097	5.44188	65.95	2.77259e-07	1.1875e-05
FAA21	0.853687	6.95714	10.5151	0.00424701	0.0152574
CAALFM_C404230WA	-0.853438	2.81521	24.1209	0.000128385	0.00104824
CAALFM_C200490WA	0.852401	5.60501	17.9433	0.000439546	0.00263335
POL2	-0.851486	6.56967	34.0626	1.90666e-05	0.000253061
IMP1	-0.851005	2.44919	14.8446	0.00125586	0.00594835
CAALFM_C112480WA	0.850708	0.368389	3.13284	0.0944858	0.171133
CAALFM_C301220WA	-0.850448	3.2704	7.31428	0.014941	0.0405158
CAALFM_C600710WA	-0.850251	3.26531	20.4931	0.000291303	0.00193628
ARO10	-0.850197	9.64156	7.13589	0.015019	0.0406543
UBA2	-0.849892	4.25934	42.1958	5.22947e-06	9.99391e-05
LYS9	-0.849642	6.38454	25.3833	9.82655e-05	0.000853849
CAALFM_C306540CA	-0.849141	1.39957	3.15593	0.0933749	0.169438
HEM13	-0.849141	5.37817	17.5876	0.00048416	0.00283868
GPR1	0.848242	7.97578	18.7019	0.000450576	0.00267804
CAALFM_C110090CA	-0.848158	4.75273	12.6238	0.00241496	0.00975479
FGR10	0.848129	3.66813	31.5342	2.9778e-05	0.000356913
CAALFM_CR01180WA	-0.847469	2.93762	11.4114	0.00353336	0.0132534
CAALFM_C102160WA	-0.847064	2.96844	15.3932	0.00107684	0.00525612
CAALFM_C107220WA	0.846717	10.6357	8.48694	0.00885901	0.0270747
WBP1	-0.846045	5.33139	19.4	0.000379106	0.00236755
CAG1	0.845773	3.91234	7.69094	0.0129314	0.0364238
CAALFM_C113180WA	0.844742	1.65357	8.42097	0.00984871	0.0294001
CAALFM_CR09510CA	-0.844733	4.95411	14.5597	0.00136183	0.00636048
CAALFM_C102310CA	-0.844222	1.87221	17.49	0.000613468	0.00337715
FRE10	0.843849	7.00902	2.98145	0.100305	0.179906
CAALFM_C205550WA	-0.843395	3.04071	15.904	0.000935566	0.00470432
COX11	0.842697	6.21964	34.9094	1.65056e-05	0.000226336
CWT1	0.841681	6.22987	30.2163	3.79317e-05	0.00042578
KGD2	0.841604	9.01043	7.42387	0.0133822	0.0372591
CAALFM_C602230WA	0.841328	7.42998	12.2125	0.00274231	0.0108667
KAR4	0.841306	4.27416	21.0669	0.000254506	0.00173574
CAALFM_C305330CA	-0.841128	0.553216	3.29022	0.0872106	0.16101
CAALFM_C603580WA	-0.840217	2.90621	18.3089	0.000497381	0.00289151
CAALFM_C112900WA	0.840069	4.13011	29.0275	4.74742e-05	0.000496015
SMI1B	-0.83849	3.65099	28.6556	5.09895e-05	0.000515788
VPS70	-0.838052	6.11135	11.1211	0.00388115	0.0142655
GPI1	-0.838012	3.176	10.0946	0.00545888	0.0183758
CAALFM_C502740WA	0.837569	4.62002	19.8639	0.000338662	0.0021665
CAALFM_C602960WA	-0.837526	2.67584	33.8962	1.96204e-05	0.00025778
CAALFM_C201650WA	-0.836966	2.23115	10.7795	0.00434072	0.0154653
CAALFM_C405380CA	-0.836847	1.10424	4.0464	0.0602331	0.120967
CAALFM_C106000WA	0.836345	3.78933	13.4905	0.00185937	0.00798518
ALS3	0.836252	8.249	14.0183	0.00135728	0.00634944
CAALFM_CR06960WA	-0.836043	3.79923	9.7206	0.00562257	0.0188219
CAALFM_C501030WA	0.835083	0.113303	2.60858	0.124514	0.213074
CAALFM_C407150WA	0.834765	2.74374	8.18868	0.00992558	0.0295857
ACB1	-0.834247	4.16206	2.45303	0.135543	0.227059
CAALFM_CR07840CA	0.833954	4.73974	11.3326	0.00362422	0.0135437
CAALFM_C602190CA	-0.832791	3.36563	10.92	0.00369362	0.0137182
CDR2	0.832644	6.31165	5.52867	0.0308991	0.0716039
CAALFM_C202530WA	0.832607	1.63252	8.47764	0.00889026	0.027129
ARV1	-0.832159	1.8614	14.7603	0.00128622	0.00607535
CAALFM_C307570CA	-0.832069	2.86121	12.6218	0.00241649	0.00975479
SEC23	-0.831857	5.74257	14.0292	0.001587	0.00710582
TBF1	0.831762	6.74545	23.6757	0.000104859	0.000898221
CAALFM_C113290WA	0.830597	0.0853919	3.67822	0.0719172	0.138095
CAALFM_C302710WA	0.830563	7.90566	6.33519	0.0208873	0.0526815
CAALFM_C500390CA	0.830388	4.43475	12.0467	0.00288809	0.011309
CAALFM_C108890CA	-0.829396	0.808486	3.7893	0.068134	0.133159
CHO1	-0.829317	5.88686	19.0406	0.00041417	0.00251881
CAALFM_CR09230CA	-0.829285	4.22522	13.7174	0.00173872	0.00760879
TNA1	-0.828334	4.62086	19.095	0.00040864	0.00249019
CAALFM_CR04280CA	-0.827928	3.72592	28.523	5.23128e-05	0.000527407
FCR3	0.826723	6.37461	16.6562	0.000763795	0.00400396
HSP78	0.826609	8.59839	6.98397	0.0159723	0.0426234
CWH41	-0.826169	4.28628	31.1949	3.16714e-05	0.000374293
CAALFM_CR05360CA	0.826146	2.7209	10.8183	0.00428548	0.0153249
NPR1	0.826084	7.48586	26.5104	7.79381e-05	0.000712054
KGD1	0.825884	10.1308	22.5703	0.00013596	0.00109329
CAALFM_CR10230WA	0.825808	6.73921	22.5429	0.000136853	0.00109755
CAALFM_C400380WA	-0.825546	3.75107	31.0812	3.23358e-05	0.000379914
CAALFM_C111510CA	0.825455	5.67096	10.3847	0.00494969	0.0170202
CAALFM_C105930CA	-0.824979	5.1854	21.2988	0.000241139	0.00165496
GIT1	-0.824725	1.26177	3.41113	0.0820676	0.153012
RFA2	-0.82446	3.89721	15.3202	0.000919331	0.00464201
HMG1	-0.824306	6.62325	30.3683	3.68746e-05	0.000417797
CAALFM_C207110CA	-0.823218	4.31275	38.7268	8.86608e-06	0.000145648
PGA62	0.823063	10.4576	11.4393	0.00309801	0.0118916
CAALFM_C307490WA	-0.822984	4.85821	6.73162	0.0187888	0.0485311
CIT1	0.822772	10.3975	8.09606	0.0102855	0.0305104
tH(GUG)3	-0.82223	-0.0893392	4.35001	0.0522368	0.108479
APE3	-0.822188	4.38883	22.2711	0.000146046	0.00113803
CAALFM_C112920CA	-0.82172	3.16738	19.7211	0.000350571	0.00223087
SEN15	-0.821375	1.69842	7.01396	0.0167991	0.0443373
CAALFM_C200690WA	0.821059	3.99952	22.9562	0.000165582	0.00124677
CAALFM_CR03600CA	-0.820441	3.71439	12.7122	0.00235047	0.00953932
APE2	-0.819626	7.87636	14.0181	0.00135737	0.00634944
CAALFM_C603360CA	0.819583	4.6081	3.49972	0.0767265	0.145024
CAALFM_C702670WA	-0.819153	3.4261	13.3941	0.00191342	0.00816619
HTA1	0.818803	4.66894	11.8036	0.0031179	0.0119549
CAALFM_C702520WA	-0.818796	3.14509	31.9204	2.77751e-05	0.000338856
CCN1	-0.818442	2.88451	10.8093	0.00429828	0.0153594
ATC1	-0.816848	7.44326	10.7397	0.00392955	0.0144259
LIP2	0.816622	1.07213	1.88126	0.187851	0.293059
MNN14	0.816387	7.03542	7.83996	0.0113591	0.0329321
EGD2	-0.816316	5.81622	19.0143	0.000416882	0.0025302
CAALFM_C107100CA	-0.816264	2.06194	17.9631	0.000543088	0.00308824
CAALFM_C402580WA	0.815883	0.383362	0.337791	0.569643	0.670711
CDC68	-0.815862	6.11436	17.7958	0.00056689	0.00318164
MUC1	0.815778	7.04168	24.31	9.06265e-05	0.000796642
CAALFM_C304190WA	0.815346	3.79858	7.27023	0.014229	0.0389876
CAALFM_C307590WA	-0.814799	3.08077	10.4309	0.00487376	0.0168049
SMT3	0.814657	6.37343	19.9595	0.000330941	0.00213012
CRG1	0.814635	4.60508	6.26973	0.0226504	0.0562211
RIM101	0.814225	11.4025	11.4039	0.00313508	0.0119979
ECM39	-0.813503	4.66588	29.9346	3.99819e-05	0.000439698
CAALFM_C405250WA	-0.813471	0.971138	8.77048	0.00796273	0.0248511
CAALFM_C401140CA	-0.813429	1.86475	7.44925	0.0141827	0.0388961
CAALFM_C110140CA	0.812126	8.12936	13.465	0.00187345	0.00802965
CTN1	0.811896	9.19739	5.54997	0.0306185	0.0710353
CAALFM_C600230WA	-0.811343	2.28548	7.53369	0.0137305	0.0379838
TLO10	-0.811196	1.06707	4.64809	0.0455582	0.0972521
SNG4	-0.810514	3.44854	21.9962	0.000205437	0.00147792
CAALFM_C502560CA	-0.81039	4.97856	28.3217	5.4396e-05	0.000537639
NSP1	-0.810197	6.99197	11.7403	0.00318113	0.0121377
CAALFM_C602280WA	-0.810121	4.20268	30.8316	3.38501e-05	0.000390116
LRO1	-0.809908	5.77697	29.2685	4.53409e-05	0.00047975
FET34	0.80837	7.62788	7.17122	0.0157953	0.0422258
CAALFM_C604120CA	0.808341	3.57373	15.3935	0.00107674	0.00525612
MXR1	0.808189	5.22101	17.9158	0.000549704	0.00311705
CAALFM_C100540CA	0.80768	6.51621	17.0175	0.000566499	0.00318164
ABG1	-0.807651	4.88323	28.69	3.50567e-05	0.000401721
CAALFM_C208460CA	-0.807189	1.93577	9.51613	0.00666037	0.0215321
RAD16	0.807005	8.2364	17.8598	0.000557649	0.00314733
MSN5	0.806328	9.49072	10.1801	0.00477506	0.0165918
CAALFM_C303470WA	0.806273	8.04063	2.60377	0.122952	0.211299
UBA4	-0.805937	4.6819	38.1117	9.77037e-06	0.000155449
CAALFM_CR06980WA	0.805903	2.28791	3.06652	0.0959074	0.173104
DPS1-1	-0.805234	6.97641	27.032	4.96659e-05	0.0005077
CAALFM_C210010CA	-0.804851	4.26832	20.0149	0.000326552	0.00211428
SYN8	0.804801	3.79221	24.619	0.000115414	0.000965352
AGM1	-0.804443	3.32366	20.7022	0.000277244	0.00185413
POR1	-0.804077	9.01006	17.8023	0.000456663	0.00270371
CAALFM_C100910WA	-0.802851	1.70447	9.80842	0.00601964	0.0198974
CAALFM_C207810WA	-0.801219	4.73444	40.0224	7.25153e-06	0.000123358
OCA1	-0.801066	3.05814	16.3572	0.000827431	0.00429283
CAALFM_C112980WA	0.801044	1.0761	2.85651	0.109079	0.191435
CAALFM_C701190WA	-0.80065	2.24557	10.0672	0.00550999	0.0185066
CAALFM_C112240CA	0.800233	4.03365	14.5476	0.00136655	0.00637265
SOD2	0.799746	6.87788	14.0665	0.00156989	0.00706359
CAALFM_CR05450CA	0.799638	4.31395	15.9865	0.000914742	0.0046227
CLC1	-0.798772	4.6558	23.1185	0.000159741	0.00121343
CAALFM_C701100CA	0.798546	3.47022	23.5368	0.000145719	0.00113803
ERV46	-0.798375	4.75299	31.9895	2.74329e-05	0.000336722
LHP1	-0.798141	5.49048	17.7481	0.000463441	0.00273438
CRZ1	0.79756	7.6001	13.4323	0.00189179	0.00809675
CAALFM_C101620CA	0.797172	6.18019	6.04913	0.0248089	0.0603144
HNM1	0.796566	8.56718	12.5766	0.00213276	0.00887036
CAALFM_C108530WA	-0.796504	2.82002	12.7771	0.00230443	0.00939666
MSH6	-0.796222	4.1107	22.1288	0.000199343	0.00144172
CAALFM_C502330WA	-0.795984	4.58242	16.8077	0.00073366	0.00387706
CAALFM_C208910CA	0.795508	6.32868	13.2729	0.00170968	0.0075089
MET28	0.793849	7.00872	10.2598	0.00464314	0.0162174
RNR3	0.793661	6.79754	16.7009	0.000618855	0.0034006
CAALFM_C602880WA	0.793378	1.62446	9.19303	0.00745987	0.0235802
DPP2	-0.792721	2.84129	12.166	0.0027823	0.0109819
MCR1	-0.792669	6.53521	17.1917	0.000539804	0.0030733
UBC8	0.792626	6.49032	32.3767	2.56003e-05	0.000318763
MUP1	0.79139	8.77497	16.2818	0.000696604	0.00371953
CAALFM_CR03740CA	0.790731	3.96258	12.9113	0.00221229	0.00913817
CAALFM_CR08350WA	0.790634	5.95687	26.5234	7.77323e-05	0.000711251
CAALFM_C700670CA	-0.790429	5.23891	14.0513	0.00157682	0.00707985
SIP5	0.790208	8.58789	14.5848	0.00114328	0.00551693
GLG2	-0.78926	3.57198	13.2179	0.00201689	0.00851222
GIT3	-0.789227	5.24639	9.44605	0.00682523	0.0219242
CAALFM_C504950CA	-0.788562	4.92302	26.6043	7.64687e-05	0.000702884
CSP2	-0.78767	1.66847	10.4628	0.00482207	0.0167167
CAALFM_C209160WA	-0.787169	3.29786	11.091	0.00391941	0.0143974
ERG4	-0.786912	5.6217	21.0429	0.000197078	0.00143047
PHO89	0.78651	10.5357	3.65126	0.0711001	0.136886
CAALFM_CR01560WA	-0.786233	1.41452	7.38247	0.0136047	0.0377394
CAALFM_C300950CA	-0.785494	3.45998	20.0894	0.000320764	0.00208833
NAM2	-0.785256	4.38135	22.3725	0.000142541	0.00112523
SOD1	0.785046	6.15638	9.5793	0.00591596	0.0196155
CAALFM_CR04760CA	-0.784994	4.26414	28.8292	4.93139e-05	0.000507337
TOM22	-0.784389	4.38812	7.29442	0.0140917	0.0387699
MRP8	-0.784151	2.73179	20.4783	0.000292328	0.00193997
CAALFM_C205770WA	0.783647	6.99163	16.7188	0.000751179	0.00394467
BMT9	0.783444	4.16967	10.8192	0.00428426	0.0153249
TRP3	-0.782674	4.34988	42.3833	5.08697e-06	9.79003e-05
SCT1	-0.78196	5.83097	25.9731	8.69734e-05	0.000774679
CAALFM_C504310WA	-0.781758	3.98755	16.754	0.000744183	0.00391706
PGA15	0.781081	2.36765	10.2302	0.00521395	0.0177055
SNL1	-0.780851	4.10957	24.8407	8.03523e-05	0.0007286
PSO2	0.780233	3.97291	29.0491	4.72783e-05	0.000495683
SEC21	-0.779953	6.57946	19.0063	0.000331212	0.00213012
MET10	0.77879	8.10087	24.0173	0.000131283	0.00105992
IFD3	0.778732	4.61545	9.75717	0.00612677	0.0202073
CAALFM_C112720CA	-0.778673	0.00494866	6.12465	0.0240446	0.0589636
CMD1	-0.778626	5.68951	26.5292	7.76414e-05	0.000711251
COX17	0.778269	3.06657	2.75734	0.114961	0.199555
CAALFM_C202280WA	0.777694	5.06243	13.9324	0.00163245	0.00725264
TIM17	0.77757	3.43955	12.9747	0.00217019	0.0090074
AAT1	0.777527	7.71419	5.00925	0.0372717	0.0832104
DAD3	-0.777484	0.834328	4.8097	0.0423522	0.0921011
CAALFM_C207240CA	-0.77666	3.01806	10.3469	0.00501299	0.0171813
HWP1	0.775184	0.789776	0.916993	0.351558	0.469184
CAALFM_C301060WA	0.774931	2.29363	7.18572	0.0157062	0.0420434
CAALFM_C208840WA	-0.774737	3.08948	3.92648	0.0637774	0.126445
CAALFM_C200640WA	0.774215	4.35854	19.3762	0.000381327	0.00237161
CBF1	0.774178	5.1062	28.4741	5.28105e-05	0.000528873
CAALFM_C602140WA	-0.773951	4.43067	10.834	0.00426347	0.0152892
SLK19	-0.773828	7.94759	12.3079	0.00232616	0.00945334
CAALFM_C503150WA	0.773374	8.58908	18.1127	0.000419918	0.00254457
SEC61	-0.773367	5.79194	3.53751	0.0770685	0.145443
SUA71	0.772624	8.39432	19.669	0.000278834	0.00186064
CAALFM_CR09990WA	0.772068	7.34432	16.5508	0.000645531	0.00351204
BUD5	0.771881	7.44138	13.7477	0.00147493	0.00676832
TPS3	-0.77186	7.3591	14.0671	0.0013372	0.00628434
CAALFM_C204370WA	-0.77148	4.63442	3.48933	0.0789308	0.148216
ADK1	-0.771149	7.27012	10.9803	0.00406353	0.0147829
CAALFM_C701280CA	-0.770743	2.97252	23.6733	0.000141445	0.00112098
CAALFM_C108680CA	0.770558	4.13802	15.2076	0.001134	0.00548295
CAALFM_C601300WA	0.770504	4.1942	8.04443	0.01132	0.0328346
MLC1	-0.77044	2.30748	6.07642	0.0245295	0.0597796
SWE1	0.770256	5.19314	10.5313	0.00471302	0.016414
ARG83	0.769869	4.68938	7.99146	0.0107096	0.0314416
CAALFM_C503480CA	-0.769868	4.19775	14.8505	0.00125375	0.00594302
CAALFM_C701180WA	-0.769643	2.46197	18.2604	0.000503521	0.00290982
TEP1	-0.769479	1.18608	5.15315	0.0363634	0.0816006
CAALFM_CR09700WA	-0.769325	3.62087	13.065	0.00211181	0.00881358
MNL1	0.769272	7.20965	17.122	0.000550307	0.00311755
TMA19	-0.76857	7.95475	26.0121	6.1941e-05	0.000597143
CAALFM_CR06270WA	0.76821	2.16811	19.8377	0.000340811	0.00217794
VMA13	-0.768131	4.79918	18.8665	0.000432457	0.0026038
ANT1	0.767722	6.89737	4.33835	0.0525201	0.108955
CAALFM_C302390WA	0.765951	4.40705	18.5563	0.000372975	0.00234869
CAALFM_C204340CA	-0.765758	0.229308	7.50315	0.0138921	0.0383606
EFT2	-0.765565	11.1815	7.67043	0.0121388	0.0347363
CAALFM_CR05730CA	0.765528	6.51074	10.207	0.00473017	0.0164548
MSB1	0.7648	5.99256	10.616	0.00410088	0.014883
MVD	-0.764398	5.15656	10.9184	0.00414674	0.0149774
CAALFM_CR09330CA	-0.764354	5.96126	8.43859	0.00978538	0.0292255
CAALFM_C108840WA	-0.764134	2.30534	14.4236	0.00141595	0.00656251
CAALFM_C106720CA	-0.764114	2.66909	12.0633	0.00287309	0.0112666
RBE1	0.763391	0.675808	1.6267	0.219149	0.330363
URA5	-0.763087	4.48367	27.8045	6.01847e-05	0.000584333
SEC20	-0.762853	2.79326	19.441	0.000375321	0.00235609
PRD1	-0.762595	4.98364	20.7204	0.000276058	0.00185029
CAALFM_C503700CA	-0.762546	4.04485	20.0728	0.000322046	0.00209347
CAALFM_CR04400WA	-0.762107	-0.127539	5.69026	0.0288419	0.0676149
PBS2	0.762017	7.08522	25.3714	7.13516e-05	0.000669088
CAALFM_C600690WA	-0.761327	3.61321	17.1981	0.000661945	0.00357557
RIC1	-0.761185	2.57294	10.0275	0.0050396	0.0172581
TRP99	-0.760461	5.22216	13.5983	0.00180089	0.00780428
RFC2	-0.76025	3.24328	17.4064	0.000626929	0.00342317
MSC7	-0.760084	4.40232	13.9245	0.00163619	0.00726009
CAALFM_C307760CA	-0.759952	4.44965	8.32984	0.00940386	0.0283808
CAALFM_C500330CA	-0.759848	7.89309	16.8219	0.000730897	0.00386844
CAALFM_CR03950WA	-0.759643	3.65252	27.4576	4.53614e-05	0.00047975
CAALFM_C504150CA	-0.759441	2.64234	13.6965	0.00174946	0.00763366
CAALFM_C402400CA	-0.759286	3.10201	18.7962	0.00044009	0.00263397
SAR1	-0.759025	4.97739	32.0567	2.71045e-05	0.000334351
SCT2	-0.75899	5.78097	18.9484	0.000423741	0.00256153
CAALFM_CR01550CA	-0.758619	2.18824	8.10496	0.0110676	0.0322884
CAALFM_C502820CA	-0.757587	3.87712	19.9419	0.000332342	0.00213512
HHF22	0.757123	2.8019	4.27686	0.0540445	0.111315
TRP1	-0.756744	3.27472	13.9815	0.00137266	0.00639452
TRY4	0.756509	7.9846	16.5329	0.000789342	0.00412713
MON2	-0.756272	4.99101	32.0517	2.7129e-05	0.000334351
SWD3	-0.755837	2.40761	21.7094	0.000219349	0.00155658
HGT4	0.755623	7.29223	25.1488	7.49835e-05	0.000692394
LPI9	0.755273	8.32249	8.54668	0.00866118	0.0266047
HEM1	0.755187	8.23676	20.926	0.00020288	0.00146379
CAALFM_C109440WA	0.754993	4.75889	7.43274	0.0142731	0.0390363
CAALFM_C201260WA	-0.753189	2.80713	14.2442	0.00149106	0.00679074
CAALFM_C402340WA	-0.753056	5.48629	8.64248	0.00908485	0.0275928
CAALFM_C402150CA	-0.752872	3.90185	8.86507	0.00838399	0.025938
CAALFM_CR08520CA	-0.752518	2.6122	15.7129	0.000985835	0.004904
RNA1	-0.752397	4.56163	11.8815	0.00304206	0.0117462
STE11	0.751767	6.66527	20.8606	0.000267105	0.00180028
CAALFM_C208240WA	0.751633	6.25442	14.4953	0.00117442	0.00563778
CAALFM_C108800WA	-0.751259	4.66753	23.4577	0.000148262	0.00114789
UBC15	0.751145	3.67628	11.1274	0.00387326	0.0142626
CAALFM_C401470WA	-0.750844	2.84056	17.2685	0.000649871	0.00352898
CRM1	-0.75001	6.55484	16.9686	0.000703091	0.00374424
CAALFM_C700680WA	-0.749934	-0.0595064	4.15966	0.0570943	0.115936
HSP104	0.749505	11.1901	1.76366	0.199766	0.307909
BMT8	-0.748623	4.0353	15.687	0.000992877	0.00493091
CAALFM_C701400CA	0.748549	3.41986	11.7663	0.00277827	0.0109732
CAALFM_CR06560CA	0.748368	6.27649	15.827	0.00095545	0.00478438
CAALFM_C400740WA	-0.748	2.48022	17.6019	0.00059594	0.00330173
HAL9	0.747304	7.69779	8.85299	0.0077213	0.0242822
FET99	0.74715	1.5762	3.82271	0.0670418	0.131621
SEC15	-0.747006	4.99222	18.5425	0.000374344	0.00235241
CAALFM_C404760CA	0.746659	4.91843	8.23544	0.00974927	0.0291464
CAALFM_C602530CA	-0.746447	3.34857	7.51711	0.013818	0.0381734
DBR1	-0.745793	3.21592	23.1402	0.000158976	0.00121066
CAALFM_C307430WA	0.744474	6.5804	15.3139	0.00110087	0.00533557
SYS1	0.744426	3.5341	15.5977	0.00101759	0.0050124
CAALFM_C407080CA	0.744013	3.355	18.4536	0.000479541	0.00281433
CDC13	0.740887	3.98951	18.9214	0.000426594	0.00257377
CAALFM_C701950WA	-0.740857	3.67065	25.1343	0.000103517	0.000890512
HGT6	-0.740675	9.6418	5.39022	0.0314134	0.0725508
CAALFM_C205390CA	-0.740322	-0.0394412	1.88175	0.187797	0.293059
CAALFM_C601330CA	-0.739766	1.89991	10.9961	0.00404259	0.0147377
CAALFM_C104430CA	-0.73955	3.38935	23.658	0.000141915	0.00112176
PLB4.5	-0.739094	3.95927	28.4802	5.27479e-05	0.000528873
CAALFM_C700600CA	-0.738618	3.85898	18.9551	0.000423035	0.00255983
UBC4	0.738315	7.68568	33.6858	2.03467e-05	0.000264814
CAALFM_C209760WA	-0.737671	2.71121	23.1194	0.00015971	0.00121343
CAALFM_C307110WA	0.737576	4.19421	17.4284	0.000623355	0.00340731
CAALFM_C702100WA	-0.737356	5.88581	16.992	0.000698767	0.00372779
CAALFM_C204480WA	-0.737341	4.53159	12.4297	0.00256363	0.0102854
CAALFM_C405810WA	0.735811	7.1913	19.6746	0.000278433	0.00186002
CAALFM_C107840WA	-0.735776	3.92008	18.125	0.000521129	0.00299154
CAALFM_C111100WA	-0.735601	3.46036	17.2073	0.000660368	0.00357344
CAALFM_C500040CA	-0.734551	3.86059	9.51419	0.00666489	0.0215352
CAALFM_C700190WA	0.73438	3.75464	10.0052	0.00562742	0.0188277
MED18	-0.733582	2.78353	18.5731	0.000465344	0.00274167
TRA1	-0.733488	9.49729	17.9538	0.000438305	0.00262853
MSO1	0.733104	4.85391	8.53641	0.00944193	0.0284388
RDH54	0.732573	3.99899	20.1356	0.000317232	0.0020711
CAALFM_C306820CA	0.732273	5.56039	21.531	0.000228533	0.00159735
CAALFM_C202840CA	-0.731332	5.18121	15.335	0.00109441	0.00530857
CDC10	-0.73131	4.03748	18.7923	0.000440522	0.00263397
CAALFM_C505340WA	0.731249	6.14126	29.5256	4.3183e-05	0.000464853
HGT9	-0.73085	3.122	6.04536	0.0248478	0.060375
CAALFM_C306690CA	0.730601	2.77358	6.4237	0.0212707	0.0534334
CAALFM_C100520WA	0.730331	3.39765	26.0539	8.55418e-05	0.000764182
VID27	0.730083	5.58751	7.26445	0.0152324	0.0411215
TIM13	0.7299	1.89319	4.04435	0.060292	0.121045
CAALFM_CR03120WA	0.729555	6.95137	11.5898	0.0033371	0.0126429
ARP1	-0.729228	1.31435	8.87247	0.00836174	0.0258824
CAALFM_C601200WA	-0.729091	0.900754	4.62146	0.0461132	0.098263
CAALFM_C206520CA	0.72806	3.66965	9.32875	0.00711152	0.0226631
CAALFM_C402690WA	0.727804	5.71263	13.1522	0.00177578	0.00772618
CAALFM_CR06310WA	0.727739	1.40891	4.57896	0.0470147	0.0996217
CAALFM_C505360CA	0.727654	7.69592	24.3322	9.01697e-05	0.000794172
CAALFM_C302350WA	0.72757	5.72164	14.3574	0.00122433	0.00582642
CAALFM_CR04850CA	-0.726973	1.86958	3.77875	0.0684829	0.133589
CAALFM_CR09050CA	0.726724	2.25277	6.21599	0.0231558	0.0572638
BIG1	-0.726414	3.59229	11.5158	0.00341706	0.0128892
CAALFM_C103950CA	-0.725799	1.09006	6.81167	0.0181987	0.047229
KTR4	-0.72578	4.44097	7.62422	0.0132638	0.0370578
END3	-0.72545	4.50134	9.46273	0.00678558	0.0218317
CAALFM_C404380CA	0.724619	1.7931	9.51798	0.0066561	0.0215298
NMD3	0.723141	7.31385	22.3478	0.000189711	0.00138701
CAALFM_CR00310CA	-0.72278	7.10537	4.90415	0.040599	0.0889613
MNN12	-0.722692	4.9531	9.24153	0.00733322	0.0232591
CAALFM_C102330CA	-0.722657	6.6324	5.63069	0.0282556	0.0666625
CAALFM_C110410WA	0.722551	4.06595	25.2787	0.000100433	0.000870183
PDX3	0.722193	7.84206	13.1646	0.0017689	0.00770737
CAALFM_C208020CA	0.72186	5.29484	30.112	3.86771e-05	0.000432539
CAALFM_C109550WA	0.721668	1.61304	3.70198	0.0710878	0.136886
MLS1	0.72126	10.4219	7.47325	0.0131221	0.0367985
ATG15	0.721183	7.12643	27.8005	4.21927e-05	0.000456634
CAALFM_C700580CA	-0.719359	2.57233	11.3014	0.00366088	0.0136301
CAALFM_C302040CA	0.719352	4.8118	13.9306	0.00163332	0.00725264
FUS1	0.718919	0.514692	6.09136	0.0243781	0.0594587
ADE6	-0.718629	6.85111	13.8196	0.00168727	0.00743752
ITR1	0.718443	6.86462	7.024	0.0157147	0.0420474
QDR3	0.71799	5.98885	28.0835	5.69801e-05	0.000556887
DCK2	-0.717927	4.65847	19.2442	0.000393886	0.00241981
CAALFM_C100810WA	-0.717756	1.95999	9.58039	0.00651317	0.0211551
OPT7	-0.717372	3.06114	9.35408	0.0064196	0.020967
CAALFM_C306760WA	-0.717344	4.6528	15.4253	0.00106729	0.00522737
CAALFM_C400580WA	-0.717305	1.7563	10.1944	0.0052774	0.0178665
CAALFM_CR09930WA	0.716113	4.94919	5.73161	0.0283409	0.0668035
GPI8	0.715823	5.17401	12.2922	0.00267511	0.0106353
PCT1	-0.714872	4.87203	25.1413	0.000103365	0.000890471
CAALFM_C601020WA	-0.714601	1.1352	8.31181	0.0102517	0.0304376
PNC1	-0.714566	3.35007	14.1271	0.00154247	0.00696705
ILV6	-0.71444	5.14564	16.1339	0.000878862	0.00449407
ASM3	-0.714324	3.87085	15.2909	0.00110792	0.00536548
CAALFM_C700030WA	0.713947	6.31439	27.5306	6.35274e-05	0.000609923
CAALFM_C306700CA	0.713929	9.32083	4.44492	0.0483881	0.101995
PHO113	-0.713869	2.69012	8.05029	0.0112953	0.0327787
COG4	-0.71382	3.67415	15.8894	0.000939286	0.00471909
CAALFM_C602450WA	0.713467	5.10945	5.98295	0.0255015	0.0615275
IFA21	-0.712955	4.67065	17.4844	0.000614348	0.00337891
OPY2	0.712485	7.50584	20.9875	0.000199806	0.00144333
CAALFM_CR04120CA	-0.712123	3.90341	24.5169	0.000117949	0.000977086
THG1	-0.711877	2.05311	10.5263	0.00472091	0.016432
CAALFM_C304810CA	-0.711566	8.28956	12.8159	0.00197548	0.00837186
VPS27	0.710964	6.91511	18.8225	0.000437215	0.0026246
CAP4	0.710137	3.38623	20.491	0.000291452	0.00193628
CAALFM_CR01700CA	-0.710055	4.80637	27.3378	4.65292e-05	0.00049038
ECM29	0.709823	8.37	10.0522	0.00499563	0.0171413
CAALFM_C203890WA	-0.70967	0.876258	2.61502	0.124081	0.212555
FGR47	0.709606	4.48591	22.6799	0.000176087	0.00131445
FAD2	0.709488	7.75488	5.2229	0.0338469	0.0771908
THR4	-0.709422	6.32528	28.984	3.3e-05	0.000383982
TPS2	0.708967	8.89973	10.6074	0.00459507	0.0161182
CAALFM_C301150CA	0.708347	6.1861	4.16044	0.0570735	0.115932
CAALFM_C202180WA	-0.708018	4.34147	10.1976	0.00527165	0.0178665
CAALFM_C106090CA	0.707994	6.79969	13.6489	0.00152067	0.00688405
POX1	0.707768	8.39084	4.34856	0.0506435	0.105899
CAALFM_C205900WA	0.70776	0.168625	3.01311	0.0986416	0.177449
CAALFM_C307670WA	0.707662	5.71627	21.7404	0.000217798	0.00154739
CAALFM_C404950WA	-0.706595	1.37444	4.49608	0.048832	0.102787
KCS1	0.706326	5.18418	14.5775	0.00135493	0.00634791
ATP7	-0.706169	5.43495	7.72312	0.0118902	0.0341279
CAALFM_CR08920WA	-0.705581	6.27527	9.73999	0.00616316	0.0202941
SPC34	0.705389	1.87501	8.18088	0.0107599	0.0315432
REG1	0.705333	9.55679	8.55149	0.00864545	0.0265699
CAALFM_C207580WA	0.705331	5.72957	10.613	0.00458653	0.0161087
CAALFM_C113130CA	0.705288	6.0905	3.23881	0.0876746	0.161472
CAALFM_C110190WA	0.705036	6.18455	12.8459	0.00225664	0.00927696
SAM50	-0.704738	2.30614	5.99144	0.0254114	0.0613592
CAALFM_C301720CA	-0.704564	7.52148	10.1966	0.00527349	0.0178665
CAALFM_C103120WA	0.704541	6.90003	18.615	0.000367207	0.0023172
CAALFM_CR10310WA	-0.70445	-0.594305	1.30065	0.269755	0.387659
PRP13	-0.704381	5.4097	9.79209	0.00548034	0.0184378
CAALFM_C301310WA	-0.703713	5.22401	10.6876	0.00400073	0.0146338
CAALFM_C501070CA	-0.703284	5.19115	5.48679	0.0314593	0.0725956
CAALFM_C502140CA	-0.702231	3.72626	15.6309	0.00100833	0.00498713
MNT1	-0.701876	9.04431	8.09121	0.0103047	0.0305251
GAT1	0.701849	4.97472	17.7742	0.000570051	0.00319345
SEC24	-0.701327	6.84492	8.57386	0.00857277	0.0264074
RPN10	0.701245	5.28739	12.8846	0.00193273	0.00823695
CAALFM_CR04350CA	0.700854	3.33997	13.0874	0.00181246	0.00783196
CAALFM_C201570WA	-0.700678	1.36332	10.4059	0.00491468	0.0169212
TEL1	-0.700616	7.44787	13.3777	0.00165449	0.00731975
DFG16	0.700153	5.62842	27.0956	6.92713e-05	0.00065262
CAALFM_C403020WA	0.699607	6.98456	9.72986	0.00560392	0.0187803
MIG1	0.698963	7.87744	10.9575	0.00409395	0.0148757
SUR2	0.698931	10.0315	7.44562	0.0132669	0.0370578
SWC4	0.698505	4.87888	15.6942	0.000824454	0.00428107
CAALFM_C208170WA	0.698394	2.48494	3.27892	0.0877103	0.161489
CAALFM_C206650CA	-0.697956	3.57528	17.0616	0.000686093	0.00367641
CAALFM_CR02700WA	-0.697715	2.25759	4.93399	0.0400626	0.088202
PEX13	0.697422	6.30205	16.4192	0.000669977	0.00360927
SAC7	0.697048	7.07868	12.436	0.00223166	0.00919933
CAALFM_C603090WA	0.696679	-0.459439	2.53245	0.129771	0.219335
PTR22	-0.696291	9.10624	13.1459	0.00177934	0.0077361
CAALFM_C307660WA	-0.696018	5.04889	10.6689	0.00450238	0.0159028
CAALFM_C105690CA	0.695798	2.66838	4.28352	0.053877	0.111045
CHS6	-0.695432	3.96789	24.7863	0.000111392	0.000940837
CAALFM_C600940CA	0.694952	1.08524	4.28523	0.053834	0.110995
RET2	-0.694628	5.25679	16.4217	0.000669496	0.00360927
CAALFM_CR00110WA	0.694547	5.7708	28.1098	5.66883e-05	0.000555748
CAALFM_C111690WA	0.694517	6.50823	28.2952	5.46762e-05	0.000539525
CAALFM_C502040WA	0.69445	5.50058	27.4623	6.43935e-05	0.000616279
CAALFM_C700060CA	-0.694158	4.641	12.1796	0.00277054	0.0109554
CAALFM_C603180CA	0.694142	8.19532	25.3735	9.84662e-05	0.000854364
CEX1	-0.69407	4.02083	10.2696	0.00514509	0.0175612
CAALFM_C404400CA	0.693847	1.84971	2.25073	0.151717	0.247292
PHM5	-0.693636	5.78441	14.776	0.00107973	0.00525844
CAALFM_C200630CA	-0.693191	2.22703	8.73797	0.00877636	0.0268765
ERG11	-0.692669	6.36839	5.07978	0.0360994	0.0811934
CDC21	-0.6926	2.98012	9.1889	0.00747075	0.0235962
PRM1	0.692394	3.27156	9.05809	0.00782541	0.0245622
CAALFM_C200270CA	0.692058	4.06482	17.9572	0.000543914	0.00309003
ARG81	0.691365	6.20948	13.9685	0.00161533	0.00719927
LIP4	0.691086	4.11056	13.8906	0.00165254	0.00731647
CAALFM_C702420CA	0.690996	5.47177	22.5111	0.00018287	0.00135337
CAALFM_C307290WA	0.690788	7.20107	19.1183	0.00040629	0.00248088
URA2	-0.690539	10.197	6.90112	0.0165208	0.0437392
RBF1	0.690254	5.32886	19.593	0.000361655	0.00229175
OXR1	-0.690221	5.25877	17.8544	0.000558429	0.00314879
YBN5	-0.689875	7.07355	22.0827	0.000152823	0.00117417
CAALFM_C209000CA	0.689208	3.10986	11.8888	0.00303507	0.0117413
CAALFM_C200870WA	-0.689064	3.09715	14.6586	0.00132395	0.00623175
DRG1	-0.688756	6.14104	30.0249	3.93116e-05	0.000435601
CAALFM_C500580WA	0.688522	5.15543	5.89703	0.0264338	0.0632715
CAALFM_C103270WA	0.687498	5.7928	12.0863	0.00285253	0.0112106
CAM1-1	-0.68662	6.55109	15.1725	0.00096007	0.00480353
CAALFM_C103720CA	0.686491	5.16227	12.9558	0.00218266	0.00904054
CAALFM_C704210CA	-0.686484	5.2231	17.0075	0.000695931	0.00371923
SUC1	0.6863	4.54687	24.9924	7.76577e-05	0.000711251
PCD1	0.685854	5.50925	6.91864	0.0174428	0.0457192
REI1	0.68585	4.46102	14.32	0.00145881	0.00671371
HEX1	-0.685796	4.31823	16.928	0.00071068	0.00377467
CAALFM_C402920WA	0.685268	7.59458	14.046	0.00157927	0.00708562
HSP21	0.68481	9.40061	2.37717	0.139468	0.232473
CAALFM_CR02630CA	-0.684661	-0.19306	1.43974	0.246479	0.361125
CAALFM_C101950CA	-0.684614	3.81568	7.43136	0.0142807	0.0390363
CAALFM_C114030WA	0.684526	5.55217	13.1134	0.00208119	0.0087038
DBP2	0.684301	7.65082	13.2995	0.0016955	0.00746838
DSE1	0.683909	5.72537	7.07618	0.0163936	0.0435013
PMT5	-0.683766	4.14993	22.6049	0.000179068	0.00132686
AGP2	0.683454	9.78853	3.74906	0.0677228	0.13257
CAM1	-0.68334	7.66848	14.1674	0.00129694	0.00611413
PXP2	-0.682574	8.36735	4.95625	0.0381813	0.0849271
CAALFM_C112870CA	0.682396	3.39575	21.6726	0.00022121	0.00156062
CAALFM_C302620CA	-0.682096	3.67357	3.67247	0.0721196	0.138395
CAALFM_CR07230WA	0.681957	0.754311	4.18383	0.0547845	0.112303
CAALFM_C108540CA	0.681727	8.18062	18.4276	0.000385962	0.00239304
CAALFM_C204730WA	-0.681657	3.90714	5.91119	0.0250171	0.0606985
CAALFM_CR08720WA	0.681403	4.70795	13.5731	0.00181436	0.00783196
CAALFM_C200700WA	0.681376	7.82753	21.8566	0.000161416	0.00122308
AKR1	0.681151	7.93282	8.64363	0.00835053	0.025861
CAALFM_CR03230WA	0.680871	4.41253	18.0856	0.000526379	0.00301309
PIN3	0.680676	7.86018	17.3762	0.000513027	0.00294783
PRE5	0.680437	5.30169	15.5942	0.000848721	0.00437734
CAALFM_C602980CA	0.6801	7.56827	7.86078	0.0121268	0.0347245
CAALFM_C201310WA	0.679855	5.71826	14.5611	0.00136128	0.00636048
CAALFM_C503870CA	0.679818	7.25518	16.8529	0.000593078	0.00329191
SFP1	0.67908	6.93798	19.1718	0.00040097	0.00245584
CAALFM_C302090CA	0.679031	4.47241	7.67666	0.0130017	0.0365537
MSS11	0.678839	4.99748	22.504	0.000183161	0.00135387
CAALFM_C700590WA	-0.678806	3.46837	7.72548	0.012763	0.0360841
IRR1	-0.678764	4.08566	24.0804	0.000129509	0.00105281
PEX8	-0.67845	4.37063	10.9275	0.00413446	0.0149509
UGA4	0.678229	1.82414	11.4674	0.0034704	0.0130497
CAALFM_C702370WA	0.677746	6.81834	13.9727	0.00161335	0.00719574
CAALFM_C201860CA	-0.677724	1.21451	2.87408	0.108075	0.19017
CAALFM_C300790WA	0.677387	3.87441	14.3867	0.00143105	0.00661721
CAALFM_C700340CA	-0.677292	6.91964	8.19893	0.0106882	0.0313939
RAD59	-0.67728	2.59549	14.8951	0.00123805	0.00587318
CAALFM_C403130WA	-0.677159	4.724	15.3998	0.00107488	0.00525602
CAALFM_C110560CA	-0.676941	2.97471	13.5289	0.00183828	0.00791824
CAALFM_C307240WA	0.676826	0.922601	3.0371	0.0992632	0.178196
CAALFM_C302690CA	-0.676706	5.53876	10.5859	0.00462805	0.0161928
CAALFM_C306390WA	0.676634	1.68917	0.837355	0.371523	0.488266
RAD52	0.676627	4.35881	22.429	0.000186277	0.00137019
CAALFM_C207720CA	0.676486	5.32055	22.8226	0.000170571	0.0012796
CAALFM_C210320CA	-0.676337	0.386422	1.63249	0.218366	0.329513
CAALFM_CR05800CA	-0.676169	2.35819	8.0161	0.0114404	0.033152
PUT2	0.676093	9.36362	1.96259	0.177218	0.279577
CAALFM_C504010CA	-0.675848	0.276714	4.58285	0.0469313	0.0994803
CAALFM_C603390WA	-0.675563	3.84811	8.63241	0.00911808	0.0276447
CAALFM_CR00340CA	0.67516	2.58325	6.41971	0.0201594	0.0513682
UFE1	0.675003	5.13853	21.302	0.000240959	0.00165496
CAALFM_C402660WA	-0.674873	2.39556	3.04574	0.0988205	0.177665
MDJ1	0.674792	4.98745	9.93075	0.00521579	0.0177055
CAALFM_C206990WA	-0.674708	4.55898	5.30294	0.0326571	0.0748201
CAALFM_C112910WA	0.67452	3.85863	1.43058	0.247928	0.362782
CAALFM_C300660WA	-0.674489	5.59344	18.6994	0.000450854	0.00267804
ATP3	-0.674314	7.6088	14.7606	0.0010847	0.00526993
CAALFM_C503640WA	-0.674185	4.05344	13.577	0.00181226	0.00783196
CAALFM_C307050WA	-0.67329	1.33638	4.44523	0.0499873	0.104708
CAALFM_C108910CA	-0.673115	3.13312	9.70424	0.00623968	0.0205013
CAALFM_C404140WA	-0.673005	3.49943	5.81897	0.0260331	0.0625851
CAALFM_C400680WA	0.672946	4.99628	23.543	0.000145522	0.00113803
AFG3	0.672117	7.42888	10.4561	0.00433504	0.0154633
CAALFM_C104640WA	0.671965	6.67181	16.2985	0.000693289	0.00370839
STE13	-0.671872	4.26094	10.1586	0.00481134	0.0166987
CAALFM_CR10200WA	-0.671583	2.50659	7.53552	0.0137209	0.0379838
CAALFM_C504080CA	0.671425	4.32275	23.6945	0.000140794	0.00111852
CMK1	-0.671342	6.95351	4.01195	0.0612273	0.122515
CAALFM_CR00830WA	-0.670854	3.41237	12.4095	0.00257969	0.0103376
CAALFM_C305850WA	-0.669776	3.15276	5.20163	0.0355992	0.0803076
LYS2	-0.669755	7.1056	18.0539	0.000426618	0.00257377
APA2	-0.669092	4.39167	8.9588	0.00810729	0.0252127
CAALFM_C402570CA	0.668969	4.6701	11.3717	0.00357885	0.0133907
LYS142	0.668866	5.57637	4.88109	0.0410192	0.0897199
SEC1	0.668638	5.55239	10.0725	0.00550002	0.0184937
RFC3	-0.66801	3.44332	14.1602	0.00152775	0.00691092
CAALFM_C208720WA	0.667681	4.33687	26.4012	7.96855e-05	0.00072473
VPS23	-0.667635	3.24211	19.3337	0.000385314	0.00239148
CAALFM_C403960WA	0.667443	5.57824	2.79082	0.112934	0.196828
CAALFM_C205820WA	0.667183	4.97497	10.2684	0.0051471	0.0175612
CAALFM_C702000CA	0.666863	0.696713	2.69756	0.11869	0.205026
CAALFM_CR03910CA	0.666793	5.07241	24.9197	0.000108297	0.000922276
HCM1	-0.666349	2.68615	11.6654	0.00325767	0.0123886
RPL35	-0.6662	7.48527	8.82518	0.00780175	0.0245134
ENA21	0.665694	9.50584	7.46958	0.0131413	0.0367985
COX7	-0.665383	4.3865	2.82099	0.111144	0.194437
SAL6	0.664673	8.68322	8.38633	0.00920375	0.0278325
CAALFM_C701230CA	0.664664	5.41387	22.2233	0.000195121	0.00141969
GCV1	-0.664594	4.89659	7.86949	0.0120871	0.0346272
RBT1	0.663476	1.58457	3.80314	0.0676789	0.13255
LIP3	0.663469	-0.524109	1.51545	0.234908	0.347954
CAALFM_C110690WA	-0.663405	3.3851	15.9319	0.000928459	0.00467637
CAALFM_C502020CA	0.662892	4.77643	15.391	0.00107751	0.00525612
CAALFM_C305360CA	0.662778	8.15825	10.3545	0.00449154	0.0158901
CAALFM_CR08450CA	-0.662199	4.10542	10.0677	0.00550895	0.0185066
CAN1	0.662132	9.20436	6.73345	0.0176968	0.0462245
CAALFM_C305250CA	0.661467	6.45553	11.1794	0.00380833	0.0140406
CAALFM_C700150WA	-0.661363	5.67406	14.9965	0.00120316	0.00574834
CAALFM_C501110WA	-0.661359	4.51167	21.68	0.000220834	0.00156062
CAALFM_C208950WA	0.66092	4.62759	5.51297	0.0311078	0.071977
CAALFM_C300440WA	0.660915	0.973767	4.07622	0.0593877	0.119667
UBP6	0.660786	6.82077	11.8565	0.00269657	0.0107065
CAALFM_C102500WA	-0.660664	2.99167	4.36671	0.051834	0.107816
CAALFM_C206080CA	-0.66032	3.74141	17.6387	0.000590306	0.00328362
OSH3	-0.659992	5.51275	8.85532	0.00841338	0.0260156
CAALFM_C109770WA	0.659978	4.08074	5.07748	0.0361369	0.0812173
CAALFM_C107360WA	0.658985	7.63592	11.684	0.00285508	0.0112106
CAALFM_C201680CA	0.658621	6.87453	30.3262	3.71639e-05	0.0004195
PHO15	0.658388	4.28796	9.6345	0.00639206	0.0208883
HAL21	-0.658382	4.3638	10.6532	0.00404858	0.0147463
HTB1	0.658373	5.93382	7.83145	0.0122616	0.0349118
CAALFM_C500080CA	-0.657994	4.3963	10.6929	0.00446665	0.0158299
MDN1	-0.657459	10.0267	18.7957	0.000350078	0.00223008
CAALFM_C602250WA	-0.657458	2.83297	4.32941	0.0527387	0.109296
CAALFM_CR09660WA	-0.657413	2.93249	13.3626	0.0019315	0.00823695
ADE17	-0.656747	7.33271	17.6411	0.00058994	0.00328362
CAALFM_C112860CA	0.656479	2.95072	18.9833	0.000420092	0.00254457
CAALFM_C111990WA	0.656473	1.00406	3.23278	0.0897863	0.16441
CAALFM_C108180CA	-0.656391	7.72912	10.5669	0.00465746	0.0162486
CAALFM_C702130WA	-0.65628	-0.335805	2.04028	0.171122	0.271806
EAF6	-0.656176	2.346	14.197	0.00151155	0.00685726
CAALFM_C503290CA	-0.655936	2.86656	18.3081	0.000497479	0.00289151
CAALFM_C204830WA	0.655202	5.83822	2.58636	0.124135	0.212555
CAALFM_C206660WA	-0.65481	2.41185	4.71711	0.0441559	0.0952348
CAALFM_CR03620CA	-0.654753	6.26602	6.06057	0.0246913	0.0600768
CAALFM_CR02970CA	0.654652	6.25498	28.4008	5.35658e-05	0.000532922
CAALFM_C102890CA	0.654639	4.21586	9.2128	0.00740795	0.0234592
URA4	-0.654569	5.39115	21.4317	0.000233831	0.00162311
CAALFM_C702430CA	0.654268	4.10935	21.2506	0.000243853	0.00167154
CAALFM_C113380WA	-0.653804	3.21411	10.3092	0.00507683	0.0173705
CAALFM_CR05760CA	-0.653741	2.56556	9.7336	0.00617676	0.0203167
DFR1	-0.653533	1.7885	12.337	0.0026382	0.0105162
CAALFM_CR02910WA	0.653528	5.77095	15.7652	0.000971764	0.00484999
MED16	-0.65316	4.9975	23.9311	0.000133752	0.00107841
CAALFM_CR07250CA	0.653003	7.56357	4.08869	0.057353	0.116383
CAALFM_C208540CA	-0.652695	1.38749	6.01029	0.0239751	0.058856
CAALFM_CR04920WA	0.652688	5.18441	20.9233	0.000263203	0.00178346
SUL2	0.652606	4.84268	5.08543	0.0374629	0.0835445
CAALFM_C602470WA	-0.652549	5.1036	12.6693	0.00207029	0.00868228
USO5	0.652439	2.64628	8.46331	0.00969728	0.0290727
VPS28	0.652261	4.2077	9.69552	0.0062585	0.0205408
MIA40	0.652053	6.28919	13.8747	0.00141836	0.00656861
CAALFM_CR08470WA	0.651978	6.49498	33.1195	2.24547e-05	0.000284285
CAALFM_C704310CA	0.651922	5.4884	14.3555	0.00144394	0.00666663
CAALFM_C306490WA	0.651914	5.30626	9.06186	0.00714589	0.0227366
CAALFM_C205540CA	-0.651546	3.74881	24.1254	0.00012826	0.00104824
CAALFM_C207360WA	-0.651399	3.50662	15.0445	0.000997015	0.00494739
PCL7	0.650608	6.68023	23.0078	0.000163699	0.00123418
ACO2	-0.650594	6.01441	11.057	0.00396297	0.0145133
CAALFM_C400070CA	0.65048	5.79984	8.84754	0.00843691	0.0260483
BFA1	0.650263	4.90264	19.1776	0.000316701	0.00206987
ARO7	-0.649968	2.78258	10.8538	0.00423577	0.0152261
CAALFM_C600540WA	-0.649318	3.05735	11.6996	0.00322251	0.0122781
CAALFM_C403730CA	-0.649275	3.05679	5.90754	0.0263177	0.0630435
BNA4	0.649274	4.57333	11.6186	0.00330659	0.012543
CAALFM_C602330WA	-0.648637	6.44658	10.9639	0.0036387	0.0135726
RHD1	-0.64861	6.97644	4.22696	0.0536639	0.110909
SAS10	0.648176	4.96042	7.43237	0.013337	0.0371676
CAALFM_C307100CA	-0.648141	6.3744	6.18518	0.0234513	0.0577816
CAALFM_C111110CA	-0.648047	2.85432	17.1314	0.000673623	0.00361922
EAP1	0.647988	5.64116	10.3797	0.00495803	0.0170219
IST1	-0.647326	2.51261	7.65056	0.0131314	0.0367985
ELF1	0.646864	9.18404	6.78136	0.0173514	0.045539
CAALFM_C204430WA	0.646864	-0.526993	1.43024	0.247982	0.362782
TCO89	0.646678	6.10779	18.2353	0.000506731	0.00292278
HPC2	0.646358	4.68083	19.0785	0.000410307	0.00249783
CAALFM_CR06100CA	0.646255	3.40281	7.46072	0.0141203	0.0388308
CAALFM_C113330CA	0.645964	5.60591	7.24613	0.0153412	0.0412859
CAALFM_C303270WA	-0.645903	2.24602	7.99793	0.0115184	0.0333141
CAALFM_C210850CA	0.645852	5.53815	13.1691	0.00204664	0.00860438
CAALFM_C103870CA	-0.645659	4.18584	3.30932	0.0863734	0.159709
ATP2	-0.645145	9.798	6.83377	0.0169822	0.044745
CAALFM_C102740CA	-0.645113	1.39995	4.8149	0.0422534	0.0919525
tS(AGA)3	-0.645022	0.273955	3.16149	0.0931095	0.169058
RAD32	-0.644867	5.09878	14.0285	0.00158731	0.00710582
CAALFM_C201220WA	-0.644698	5.81864	14.1446	0.00130595	0.00615182
CAALFM_C404800WA	-0.643971	6.5837	13.3612	0.00166306	0.00734155
ATG9	0.643367	5.80038	12.511	0.00217833	0.00903116
GUS1	-0.643275	6.79758	18.0989	0.000524604	0.00300577
CAALFM_C305760WA	0.643012	6.68749	8.65747	0.00903561	0.0274754
CAALFM_C301970CA	0.642832	-0.120596	2.9774	0.102387	0.182988
CAALFM_C403140CA	-0.642784	3.26838	9.6804	0.00629131	0.0206261
SEC34	-0.642394	5.09863	17.6805	0.000583962	0.00325628
CAALFM_C112830CA	0.641302	6.27534	8.03074	0.0105481	0.0310731
CAALFM_C402460WA	-0.641211	0.683086	1.24271	0.280313	0.398777
ARF1	0.64112	6.22698	11.0728	0.00394273	0.0144479
FGR6-4	0.641052	3.66487	16.285	0.000843695	0.00435849
CAALFM_C502920WA	-0.64078	4.04238	14.2747	0.00147799	0.00677208
OPI1	0.640421	6.45879	5.79514	0.0263032	0.0630435
CAALFM_C209680WA	0.639969	3.41538	8.84805	0.00843535	0.0260483
CAALFM_C701610WA	0.638185	3.56474	17.2597	0.000651364	0.00353105
ZCF11	0.638177	4.91367	17.2389	0.000654924	0.00354716
CAALFM_C206510WA	0.63787	4.36284	14.857	0.00105399	0.00517482
CAALFM_C202570WA	0.637707	5.56542	6.68477	0.0180556	0.0469789
DQD1	-0.637705	4.11165	13.8339	0.00168018	0.00741169
ZCF16	0.637592	6.54703	7.49828	0.0129925	0.0365448
CAALFM_C500750CA	0.637459	6.94771	10.3507	0.00500651	0.0171688
HYR4	0.637429	6.55523	11.5064	0.00302925	0.0117297
CAALFM_C505130CA	-0.637305	3.12167	16.1811	0.000867701	0.00445204
MUB1	0.637189	6.07544	10.55	0.00419589	0.0151207
PNP1	-0.636876	3.62821	4.07709	0.0593632	0.119658
CAALFM_C503450WA	0.636773	2.43878	3.22951	0.0880975	0.162042
CAALFM_C405870CA	-0.636711	3.08818	5.69859	0.02874	0.0674548
CAALFM_C305280CA	0.636409	6.13574	9.05591	0.00783148	0.0245685
RFC1	-0.636205	5.02347	17.5385	0.000605793	0.0033439
GCR3	-0.634844	6.5207	16.1427	0.000724744	0.0038426
tI(UAU)1	0.634834	1.65205	3.07437	0.0973702	0.175404
tR(CCU)1	0.63479	0.216344	2.31485	0.146348	0.241442
CAALFM_C502390CA	-0.63457	3.57198	9.31334	0.00651573	0.0211551
BRG1	0.634481	9.46513	4.52114	0.0466853	0.0991016
CAALFM_C306670CA	0.634094	2.46365	2.31583	0.146268	0.241408
CAALFM_C205590CA	0.633946	3.09743	8.7063	0.00887734	0.0271033
POT1	0.633837	8.73671	5.98599	0.024226	0.0592654
CAALFM_C703590CA	0.633601	7.05739	11.6369	0.00328742	0.0124939
SLD1	0.633537	7.06619	10.1196	0.00487812	0.0168049
CAALFM_CR04680CA	0.633307	0.346285	1.30094	0.268092	0.385753
CAALFM_C403930CA	-0.632829	3.27205	12.3134	0.00265764	0.0105867
CAALFM_CR10460WA	0.632703	3.5817	4.00248	0.0615041	0.122947
CAALFM_C110570CA	-0.632579	1.31788	4.82976	0.0419727	0.0914405
CAALFM_C307820WA	-0.632202	3.33099	5.01156	0.0387059	0.0858726
YHM2	0.631289	6.08153	8.228	0.0105738	0.0311336
DYN1	0.630948	8.23763	10.421	0.0043884	0.0155983
SAM51	-0.630775	4.16804	10.1337	0.00538696	0.0181742
CAALFM_C205910WA	0.630354	6.34915	24.6466	0.00011474	0.000963718
GDS1	0.63025	8.46234	14.4064	0.00120634	0.00574987
CAALFM_C104930CA	-0.630226	1.97128	5.12421	0.0368287	0.0824041
MPH1	0.630221	4.28798	12.7658	0.00200732	0.00848894
CAALFM_C108960WA	0.630095	3.68554	0.901	0.355685	0.473333
CAALFM_C103660WA	-0.629785	2.29322	6.43946	0.021135	0.0531808
CAALFM_C603530CA	0.629472	3.23035	4.67345	0.0450372	0.0964516
CAALFM_C111580WA	0.629057	4.84422	12.4421	0.00255383	0.0102612
SKP1	-0.628468	5.7976	18.653	0.000363533	0.00229642
CAALFM_C104350CA	-0.628403	4.01591	10.6121	0.004588	0.0161087
CAALFM_C104360CA	-0.628182	6.31316	28.561	5.19296e-05	0.000524419
PEX14	0.628042	6.74312	10.2767	0.00461574	0.0161685
RBR2	-0.62781	4.29722	7.77065	0.0125465	0.0355702
CAALFM_C503110CA	-0.627555	2.40866	8.67536	0.00897726	0.0273668
CAALFM_C206280CA	0.627141	0.516287	2.03974	0.171175	0.271819
CAALFM_CR03070WA	-0.627135	4.63025	20.7536	0.000273906	0.00183995
CAALFM_C106630WA	0.627115	3.15815	6.12428	0.0240482	0.0589636
TPD3	-0.626893	6.2012	8.79626	0.0078864	0.0246895
CAALFM_CR08170CA	-0.626642	3.70367	11.0762	0.00393825	0.0144479
CAALFM_C306800CA	-0.626243	3.74469	9.5572	0.00656586	0.0212835
CAALFM_C500600CA	0.626129	0.733554	3.55158	0.0765343	0.144767
ALK8	-0.62593	6.17654	2.77471	0.112023	0.195692
UGP1	-0.625809	7.21522	7.45606	0.0141456	0.038865
AKL1	0.625405	6.75549	16.9447	0.000707541	0.0037613
CAALFM_C113280CA	-0.625032	3.33162	9.3289	0.00711115	0.0226631
AGP3	0.624685	4.59277	22.796	0.000171585	0.00128561
CAALFM_C300620CA	0.624681	4.18189	12.137	0.00280763	0.0110674
SMD2	-0.624411	2.47698	12.3389	0.00263667	0.0105162
CAALFM_CR04460CA	-0.624374	1.98066	4.35794	0.0504188	0.105466
CAALFM_C109610WA	-0.624135	4.71145	18.6981	0.000450996	0.00267804
CAALFM_C114270WA	-0.623893	3.04403	15.3447	0.00109146	0.00529849
CAALFM_C501960CA	-0.623649	6.66092	15.6519	0.000834627	0.00432274
CAALFM_C400560CA	-0.623611	3.45724	14.2164	0.00150308	0.00683518
PRN4	-0.623017	4.50898	5.63938	0.0294722	0.068852
CMK2	-0.622929	4.93469	9.11283	0.00701286	0.0224027
SEC13	-0.622845	4.99648	4.08628	0.0591056	0.119178
CAALFM_C405850CA	-0.62219	6.41854	2.80453	0.112116	0.195798
CAALFM_C110320WA	-0.621639	2.30166	3.1716	0.0926297	0.168238
CKS1	0.621633	3.8805	6.84904	0.0179305	0.0467136
GCN1	-0.621449	9.04796	7.43451	0.0133256	0.037153
FET31	-0.620374	8.42776	16.2518	0.000702558	0.00374424
CAALFM_C110110WA	0.618592	2.88281	12.871	0.00194112	0.00826112
ARL1	0.618163	3.67848	15.8505	0.000949323	0.00475764
CAALFM_C109570WA	0.618135	5.65044	17.6291	0.000591762	0.00328763
CAALFM_C105330CA	0.617523	5.82528	20.4067	0.000297349	0.00196285
CAALFM_C600490WA	0.617143	4.5034	9.80266	0.00603158	0.019926
CAALFM_C402110WA	-0.616983	3.43829	14.4771	0.0013944	0.00648752
GAP5	0.616811	6.78476	13.0284	0.00184658	0.00794267
CPP1	0.616446	6.47922	10.6831	0.00400699	0.0146478
CAALFM_C102770WA	-0.615889	2.53866	15.5274	0.00103753	0.00510233
CAALFM_C701940CA	0.615567	8.10568	10.4951	0.00427665	0.0153249
KAR9	-0.615555	3.72304	24.1186	0.000128448	0.00104824
UGA32	-0.615416	4.67504	6.18438	0.022261	0.0554596
LYS14	-0.615412	3.63023	19.1772	0.000400431	0.00245503
DDI1	0.615183	4.95382	4.0293	0.0607244	0.12163
CAALFM_CR07850WA	0.615036	4.85438	16.2282	0.000856716	0.00439941
CAALFM_CR06510WA	-0.614893	3.4499	2.36741	0.142119	0.236309
[truncated: 4,040 more rows]

## Sheet: 5-edgeR_Ca_adh1_with_PavwoPa
genes	logFC	logCPM	F	PValue	FDR
CAALFM_C402580WA	7.25836	0.383362	5.92419	0.0277491	0.080027
tK(CUU)1	7.11687	-0.280878	14.716	0.00158962	0.0109299
TPO2	6.17965	7.86869	101.409	4.30608e-09	1.47655e-06
CAALFM_C300590WA	5.58316	-0.377554	4.98702	0.0410151	0.105896
SNQ2	5.49212	12.0245	230.093	3.9196e-12	2.36704e-08
CAALFM_C205060CA	5.32712	8.48408	99.1798	1.49753e-08	3.34947e-06
CAALFM_C700500WA	-5.06479	-0.454628	2.94893	0.109346	0.213634
CAALFM_C208100WA	4.77858	9.28423	140.449	2.86959e-10	3.46589e-07
CAALFM_C406910WA	4.68992	7.57302	78.9836	3.15594e-08	5.60551e-06
CAALFM_C303460CA	4.68769	7.90522	143.921	2.33187e-10	3.46589e-07
CAALFM_C403340CA	4.68362	7.07823	42.5878	2.8654e-06	0.000145413
CAALFM_C700760CA	4.68105	3.53423	70.5936	1.72829e-07	1.89899e-05
TRR1	4.62072	10.9714	86.2323	1.58256e-08	3.41323e-06
CAALFM_C203110WA	4.5763	6.5675	61.4114	2.14137e-07	2.26872e-05
CAALFM_C109210CA	4.55076	10.6947	114.465	1.59449e-09	8.23896e-07
CAALFM_C206450CA	4.55024	4.51075	68.092	2.22223e-07	2.3138e-05
CAALFM_C304170WA	4.44433	5.83337	107.874	8.02422e-09	2.10688e-06
CAALFM_C106980CA	4.33631	8.75099	75.7006	4.38894e-08	7.36245e-06
PDR16	4.24782	8.88907	125.638	7.3437e-10	5.54358e-07
CAALFM_C700770WA	4.21674	9.22839	48.1056	1.24187e-06	8.33298e-05
CAALFM_CR03320CA	4.20658	-1.45634	2.64195	0.124668	0.233811
RTA3	3.90447	8.13171	130.941	5.18989e-10	5.02165e-07
CAALFM_C110360CA	3.87219	9.16248	68.0615	9.91073e-08	1.39966e-05
TES1	3.85254	4.91614	119.133	3.80621e-09	1.47655e-06
YMX6	3.83352	6.59963	52.0803	7.09492e-07	5.56025e-05
FLU1	3.77295	7.78932	101.744	4.19208e-09	1.47655e-06
MDR1	3.75557	7.63702	60.7005	2.33404e-07	2.34921e-05
OYE32	3.73462	9.49204	49.889	9.62096e-07	7.08549e-05
MRF1	3.6798	8.45808	140.476	2.86499e-10	3.46589e-07
CSA2	3.63456	1.79755	23.4865	0.00014733	0.00220956
MFA1	3.6263	1.35873	15.2688	0.00111478	0.00856505
CAALFM_C208200WA	3.59156	8.43302	37.645	1.05253e-05	0.000355096
CAALFM_C205960CA	3.51074	3.10843	45.2581	3.36683e-06	0.00016397
OYE22	3.51055	7.57625	106.113	2.9745e-09	1.38177e-06
CAALFM_C704090CA	3.48648	9.01561	87.2538	1.44145e-08	3.34805e-06
JEN1	-3.42257	6.15334	44.1101	3.96059e-06	0.00017697
TSA1B	3.41315	10.4452	100.467	4.64556e-09	1.47655e-06
CAALFM_C200760CA	3.41105	8.98272	100.772	4.53249e-09	1.47655e-06
TSA1	3.38184	10.4582	91.9241	9.51161e-09	2.39336e-06
CAALFM_C401800WA	3.33472	2.55609	47.1358	2.59816e-06	0.000137465
FRE9	3.28299	8.09579	73.764	5.36071e-08	8.56287e-06
CAALFM_C403370CA	3.27929	6.60683	121.098	9.98758e-10	6.70167e-07
YHB1	3.20379	11.0235	46.6808	1.53048e-06	9.52843e-05
CAALFM_C207280WA	3.16266	3.43196	58.0469	6.61651e-07	5.25752e-05
HAP3	3.13678	5.37999	118.163	4.04869e-09	1.47655e-06
tL(UAA)4	3.04496	-0.567438	15.6868	0.000992935	0.0079527
GTT1	-3.03793	1.58263	26.3858	7.99352e-05	0.00144098
FCR1	3.01938	8.59926	67.3216	1.07653e-07	1.4447e-05
CAALFM_C703780CA	3.00632	4.99451	33.8928	1.96317e-05	0.000561583
CAALFM_CR09060WA	-2.99908	-0.731808	31.3573	3.07492e-05	0.000742779
CAALFM_C205980CA	2.97355	6.69885	72.717	1.40411e-07	1.66263e-05
SFH5	2.97112	5.45265	183.507	2.87203e-11	8.67209e-08
CAALFM_C208090WA	2.93595	4.00481	109.032	7.40912e-09	2.0338e-06
ALK2	2.91396	8.34915	133.106	1.63715e-09	8.23896e-07
CAALFM_CR09100CA	2.88095	6.8118	88.3815	1.30161e-08	3.14416e-06
GST3	2.83431	5.81653	71.6211	1.56202e-07	1.81404e-05
CAALFM_C110310WA	2.82873	5.46587	25.1017	0.000104227	0.00172919
CDR4	2.82264	11.6504	36.2943	8.21292e-06	0.000291817
ARR3	2.80609	8.20722	38.5531	5.55228e-06	0.000222054
CAALFM_C202550CA	2.80326	5.03499	44.7469	3.61797e-06	0.000171508
NRG2	2.79869	0.429615	28.4747	5.28043e-05	0.00109644
CAALFM_C105890WA	-2.79235	3.87567	27.1245	6.88726e-05	0.00132039
YIM1	2.75921	8.1721	44.3713	2.16917e-06	0.000119087
CAALFM_C200770WA	2.7524	5.92961	112.963	5.682e-09	1.71568e-06
OYE23	2.72397	6.35046	15.3665	0.00108486	0.00839216
CAALFM_C306390WA	2.72247	1.68917	8.59145	0.00851614	0.035665
IFA14	2.71259	4.89212	83.2606	2.08761e-08	4.20236e-06
GTT12	2.70474	1.95486	61.946	4.26055e-07	3.65083e-05
CFL2	2.65912	7.01798	37.26	6.93341e-06	0.00025742
IFD6	2.65379	6.15348	15.6541	0.00100191	0.0079822
[truncated: 5,969 more rows]

## Sheet: 6-CLC
				PA14 on CAF2				PA14 on CAF2				PA14 on CAF2				PA14 on CAF2				PA14 on CAF2				PA14 on adh1				PA14 on adh1				PA14 on adh1				PA14 on adh1				PA14 on adh1				CAF2 on YPD				CAF2 on YPD
[truncated: 6,264 more rows]
[truncated: 18 more columns]
