# Supplementary material for: Conditional antagonism in co-cultures of Pseudomonas aeruginosa and Candida albicans: An intersection of ethanol and phosphate signaling distilled from dual-seq transcriptomics
Source: PLoS Genet. 2020 Aug 19;16(8):e1008783. doi: 10.1371/journal.pgen.1008783 (PMC7480860; doi:10.1371/journal.pgen.1008783)
Supplement: S3 Dataset — (XLSX) [file pgen.1008783.s009.xlsx]

## Sheet: legend
S3 Dataset: P.a. DEGS in co-culture with C.a.
Supplemental Dataset 3: Results from the EdgeR analyses showing fold-changes and associated statistics comparing P.a. gene expression when grown on C.a. WT vs. C.a. adh1∆/∆ (tab 1), on C.a. WT vs. YPD as a monoculture (tab 2), and on WT C.a. adh1∆/∆ vs. YPD as a monoculture (tab 3). Log fold-change magnitudes of > 1 and FDR values of > 0.05 were used for differential expression cutoffs. Positive …

## Sheet: 1-edgeR_Pa_on_CAF2vadh1
genes	logFC	logCPM	F	PValue	FDR
PA14_71110	-6.28966	0.865284	28.9407	0.000220216	0.00144476
PA14_26200	-5.60485	0.533447	38.5316	0.000384495	0.0022006
PA14_63780	5.17085	5.247	87.6452	1.15052e-07	6.52837e-06
mgtA	5.10443	8.97317	133.137	7.12785e-09	1.11757e-06
PA14_63820	4.46185	6.32166	108.011	2.91383e-08	2.75565e-06
phzC1	4.34978	6.88886	262.957	6.12924e-11	5.21685e-08
PA14_13880	-4.32568	0.0500099	12.9087	0.0247338	0.0598068
PA14_63770	4.31529	1.74919	16.7735	0.00125462	0.00550848
PA14_61330	4.25686	7.00869	86.4874	1.25404e-07	7.00422e-06
PA14_71100	-4.03115	4.60135	22.3324	0.000268433	0.00166423
fepD	-3.86862	2.07654	19.4086	0.000507628	0.00272473
PA14_55410	3.85755	10.7369	29.1822	7.26116e-05	0.00062524
PA14_09370	-3.85258	4.18075	21.4035	0.000326723	0.00193886
phzG1	3.82248	5.74337	71.0728	4.38801e-07	1.71488e-05
exbD2	3.50148	3.66253	52.7402	2.72528e-06	5.8198e-05
PA14_55300	3.45691	5.36501	34.2608	3.13582e-05	0.000328645
pchG	-3.43835	5.87013	11.9047	0.00355538	0.0126315
PA14_55620	3.4378	3.93989	18.2175	0.000669146	0.00337005
PA14_39800	-3.40024	3.66242	16.4375	0.0010321	0.00474478
phzB1	3.38509	7.05667	381.195	4.22911e-12	2.51971e-08
PA14_70870	3.38214	3.89154	12.7971	0.00273882	0.0102887
PA14_55330	3.34903	4.82319	31.9816	4.51795e-05	0.000434161
PA14_55290	3.3193	5.7622	28.9587	7.55163e-05	0.000643671
pchD	-3.28746	6.59147	230.216	1.57865e-10	8.55054e-08
PA14_63750	3.26658	5.91162	97.9183	5.57754e-08	4.21678e-06
PA14_62050	3.25855	3.88375	16.6467	0.000979506	0.00454863
PA14_08610	3.2484	4.10353	15.4609	0.00132412	0.00575428
pchC	-3.16147	4.40802	29.1733	7.27243e-05	0.00062524
PA14_54550	3.14688	3.38146	69.7562	4.93427e-07	1.81472e-05
lasI	3.12318	9.33607	310.181	1.8759e-11	4.32951e-08
PA14_09320	-3.07552	5.78511	39.2564	1.49185e-05	0.000187519
phzS	3.05763	7.42614	250.106	8.76149e-11	6.52512e-08
PA14_09300	-3.05305	5.64285	78.502	2.3376e-07	1.11419e-05
PA14_54540	3.00121	6.26394	264.017	5.95576e-11	5.21685e-08
exbB2	2.98834	5.65646	51.652	3.08433e-06	6.34503e-05
phzA1	2.98194	5.81533	177.65	9.7689e-10	2.77158e-07
PA14_09350	-2.97862	3.73224	117.188	1.68908e-08	1.9353e-06
PA14_55400	2.97317	9.8426	89.0887	1.03475e-07	6.11848e-06
fptA	-2.92944	8.32438	202.199	3.94667e-10	1.67959e-07
PA14_19650	2.92514	3.87106	168.196	1.42904e-09	3.76819e-07
PA14_63110	2.87027	5.35643	48.237	4.61145e-06	8.17708e-05
PA14_60480	-2.86317	6.7405	52.1819	2.90319e-06	6.1241e-05
PA14_55280	2.86259	5.5952	28.3314	8.43975e-05	0.00070723
PA14_19970	-2.83068	3.0459	13.4386	0.00228347	0.00890763
PA14_41340	2.79581	1.0575	7.83915	0.0134327	0.0368134
PA14_54570	2.72563	5.75816	158.415	2.16389e-09	4.60444e-07
PA14_32710	-2.69538	4.34911	16.7755	0.000948671	0.00443578
hasAp	-2.67902	6.76194	145.04	3.97128e-09	6.95908e-07
PA14_05740	2.66889	4.41445	72.9502	3.72355e-07	1.50918e-05
PA14_48540	2.66777	5.60769	137.12	5.83104e-09	9.38954e-07
PA14_48550	2.66494	4.6215	83.3628	1.59032e-07	8.31154e-06
PA14_58040	-2.65892	6.43896	72.9841	3.71264e-07	1.50918e-05
PA14_54520	2.65879	5.66162	36.026	2.39138e-05	0.000266814
gnyH	2.63535	6.61606	89.9713	9.70493e-08	5.96103e-06
pstC	-2.61934	7.95788	73.9133	3.42746e-07	1.46378e-05
phzD1	2.61321	7.25169	108.291	2.86399e-08	2.75565e-06
phzC2	2.59653	9.64432	58.9926	1.38896e-06	3.66169e-05
PA14_33870	2.5783	5.7737	43.5181	8.35155e-06	0.000123165
PA14_39810	-2.56431	3.32872	18.9802	0.00055998	0.00292756
pchE	-2.54508	7.04593	66.4771	6.66358e-07	2.32173e-05
PA14_10210	-2.54287	4.65105	46.7115	5.55905e-06	9.24011e-05
PA14_37150	2.53792	4.26433	110.012	2.57831e-08	2.56026e-06
PA14_47390	-2.52759	4.9659	90.753	9.17339e-08	5.69324e-06
PA14_55320	2.51355	6.25001	83.2373	1.60582e-07	8.31952e-06
PA14_07470	-2.47721	0.31475	4.78965	0.0448137	0.0973522
PA14_63120	2.47322	4.77546	41.9322	1.03101e-05	0.000142523
phzF1	2.43463	6.85712	101.495	4.40263e-08	3.60829e-06
dhT	2.42962	6.76904	226.64	1.76387e-10	8.75762e-08
PA14_55540	2.42808	8.41424	12.4925	0.00299075	0.0110129
gnyB	2.42652	8.37758	88.1985	1.10449e-07	6.32748e-06
phzE1	2.40115	9.46332	89.214	1.02535e-07	6.11848e-06
PA14_61340	2.4002	5.2266	53.0348	2.6364e-06	5.73272e-05
pchF	-2.39925	7.14261	56.4525	1.81325e-06	4.44581e-05
PA14_20500	2.38905	1.13004	5.35007	0.0352747	0.080247
snr1	2.38903	8.26468	69.794	4.91754e-07	1.81472e-05
gnyA	2.352	8.13841	49.8232	3.81535e-06	7.16055e-05
pchR	-2.35036	5.65982	92.0013	8.39149e-08	5.37597e-06
PA14_55260	2.34949	3.78203	49.0419	4.18612e-06	7.65058e-05
PA14_13460	-2.34251	3.52402	11.0155	0.00465686	0.0157021
PA14_55390	2.34106	4.87505	16.6224	0.000985456	0.00456914
PA14_58720	-2.33642	8.86041	74.9523	3.13755e-07	1.40553e-05
PA14_48530	2.32563	6.93732	167.198	1.48929e-09	3.76819e-07
PA14_05750	2.30806	4.32005	51.1974	3.24996e-06	6.51962e-05
phzM	2.30522	8.15835	187.034	6.81921e-10	2.13836e-07
PA14_31470	2.30465	7.42595	234.223	1.39683e-10	8.32232e-08
PA14_48560	2.30111	6.24353	114.396	1.98556e-08	2.15639e-06
PA14_64700	-2.29376	3.87811	10.9542	0.00474608	0.0159424
gnyD	2.29284	9.46153	147.796	3.48997e-09	6.30098e-07
PA14_55450	2.29052	4.302	51.3684	3.18649e-06	6.48674e-05
PA14_24780	2.29031	5.23995	195.661	4.97184e-10	1.85139e-07
PA14_10380	2.28144	7.66066	181.244	8.4953e-10	2.53075e-07
PA14_63220	2.27879	5.1342	27.2941	0.000101811	0.00080237
phzF2	2.27798	6.84621	97.2762	5.82415e-08	4.33754e-06
htpX	-2.27481	8.14182	303.768	2.18002e-11	4.32951e-08
sodM	-2.27222	6.1538	93.1552	7.73535e-08	5.07438e-06
hutH	2.26167	5.0081	45.5927	6.39505e-06	0.000101605
pvdS	-2.2579	7.51873	95.1821	6.71861e-08	4.76541e-06
PA14_47400	-2.244	4.88816	47.7809	4.87407e-06	8.49115e-05
PA14_06180	-2.2403	4.76648	45.1871	6.73261e-06	0.000105283
phzB2	2.23613	10.0874	46.1611	5.95378e-06	9.66557e-05
PA14_63740	2.23018	1.89628	9.18448	0.00840658	0.0249434
fumC	-2.21191	7.55497	267.329	5.4482e-11	5.21685e-08
PA14_31530	2.20844	7.09686	277.279	4.19511e-11	5.21685e-08
PA14_48590	2.20235	5.67004	92.7142	7.97898e-08	5.16726e-06
katB	2.19915	8.834	26.0752	0.000127715	0.000965641
PA14_55460	2.18913	1.63635	15.0098	0.00149004	0.00631616
PA14_61560	2.18307	4.4737	88.4164	1.08694e-07	6.32748e-06
phzG2	2.17011	8.12887	62.8112	9.46341e-07	2.89144e-05
phoB	-2.16675	6.85758	28.2245	8.60265e-05	0.000714848
pstA	-2.16093	7.91545	73.0257	3.69933e-07	1.50918e-05
pchB	-2.14606	4.66899	67.5497	6.03184e-07	2.12649e-05
PA14_06170	-2.14208	4.23958	61.2145	1.10839e-06	3.14465e-05
PA14_55250	2.13232	4.83241	26.2532	0.000123504	0.000937713
PA14_36560	2.1295	7.33677	104.365	3.66044e-08	3.25506e-06
fepB	-2.12504	3.91927	15.1876	0.00142195	0.00609801
PA14_55470	2.10855	2.71157	7.60243	0.0146381	0.0394453
PA14_08160	2.09395	3.81839	37.0419	2.05495e-05	0.000239597
PA14_55480	2.09321	2.66622	40.5969	1.23693e-05	0.000164319
PA14_72210	2.09313	5.86174	38.5304	1.65449e-05	0.000204088
lipC	2.09226	5.06319	41.9496	1.0286e-05	0.000142521
dctA	2.09158	9.31767	54.3942	2.26661e-06	5.11532e-05
phnD	2.09097	7.14931	27.2082	0.000103429	0.00081297
fdx2	-2.08446	6.36242	131.444	7.77614e-09	1.15826e-06
PA14_55380	2.07493	4.95664	46.3768	5.79541e-06	9.46002e-05
pchA	-2.07132	6.71186	85.634	1.33711e-07	7.37638e-06
ahpF	2.07052	8.96707	55.5804	1.99146e-06	4.74604e-05
PA14_08180	2.06986	2.56724	30.4138	5.87114e-05	0.000530702
hscA	-2.06578	8.16883	117.934	1.6185e-08	1.89079e-06
PA14_04810	2.05947	7.60398	129.361	8.66704e-09	1.22948e-06
actP	2.05884	9.39781	56.0354	1.89612e-06	4.59479e-05
PA14_68900	-2.0449	6.45021	113.045	2.14998e-08	2.2473e-06
PA14_28190	-2.04424	1.1471	4.88903	0.0590555	0.122171
PA14_67300	2.0407	5.17342	108.029	2.91057e-08	2.75565e-06
PA14_08250	2.03894	3.33035	42.457	9.60943e-06	0.000135671
mmsB	2.02792	7.03215	74.4924	3.2623e-07	1.43685e-05
plcN	2.02591	6.17914	37.1454	2.02379e-05	0.000237809
PA14_08110	2.02207	1.44884	17.0933	0.000877161	0.00416756
PA14_06800	-2.01767	2.55153	13.4552	0.00227286	0.00887979
PA14_11810	2.01551	9.4539	205.761	3.49036e-10	1.59966e-07
PA14_10500	-1.99096	7.88557	112.414	2.23195e-08	2.29275e-06
PA14_00620	1.98823	8.43821	89.0563	1.0372e-07	6.11848e-06
fahA	1.98792	7.3392	151.246	2.97804e-09	6.04622e-07
katA	1.96811	11.2781	27.2085	0.000103422	0.00081297
PA14_08260	1.96236	3.83028	50.2167	3.64278e-06	7.04998e-05
PA14_09630	1.94824	6.63197	27.0577	0.00010633	0.000833575
PA14_58010	-1.94791	5.24894	64.3594	8.14405e-07	2.60872e-05
PA14_51600	1.94777	6.62276	91.4033	8.75623e-08	5.54996e-06
PA14_13660	1.9457	3.24043	19.449	0.00050298	0.00270465
PA14_09660	1.9402	6.80628	23.8288	0.000197676	0.00133529
ilvA2	1.93322	5.00686	46.8491	5.46506e-06	9.21093e-05
PA14_18150	1.92619	7.74033	63.6418	8.7277e-07	2.7225e-05
PA14_11190	1.9218	6.26031	23.9858	0.000191568	0.00131041
PA14_45930	1.92094	6.71427	161.883	1.86299e-09	4.43113e-07
lasA	1.90436	8.83999	33.3237	3.63595e-05	0.000368418
ureE	1.90217	4.43243	93.6311	7.48181e-08	5.00861e-06
pilA	-1.90018	12.9514	45.1293	6.78238e-06	0.000105508
PA14_13340	1.89628	7.17028	30.0138	6.28647e-05	0.000559862
PA14_44590	1.89209	8.643	78.1735	2.40099e-07	1.13532e-05
PA14_37990	-1.88801	2.90588	22.0105	0.000287177	0.00174592
arcA	1.8763	9.3667	99.1603	5.13335e-08	3.97201e-06
glnA	1.85984	11.614	101.695	4.34553e-08	3.60829e-06
PA14_06620	1.85943	5.81366	196.73	4.78539e-10	1.85139e-07
PA14_51610	1.85812	2.80145	23.8265	0.000197766	0.00133529
citA	1.84695	6.77293	49.3075	4.05567e-06	7.4877e-05
gnyR	1.84647	7.03668	123.929	1.15882e-08	1.47239e-06
PA14_19730	1.83348	5.55523	90.7767	9.15781e-08	5.69324e-06
PA14_29375	-1.83276	4.81113	32.7667	3.97591e-05	0.000392843
PA14_42080	1.83155	7.52936	50.3852	3.57163e-06	7.04629e-05
PA14_07430	1.83006	8.75266	51.299	3.21206e-06	6.48727e-05
rhlB	1.8296	9.09851	49.8806	3.78961e-06	7.16055e-05
PA14_11210	1.82932	5.57136	27.4376	9.91762e-05	0.00078576
PA14_18640	1.82548	5.47517	240.789	1.14782e-10	7.59856e-08
PA14_04790	1.82536	6.08401	127.005	9.81696e-09	1.29976e-06
amaB	1.82189	6.23321	69.4108	5.09008e-07	1.84516e-05
PA14_38220	-1.82161	5.49701	101.242	4.47569e-08	3.60829e-06
PA14_19850	1.81849	4.01588	84.4133	1.46701e-07	7.80396e-06
PA14_47970	1.81737	3.90837	45.0931	6.81372e-06	0.000105718
arcB	1.81439	8.87468	51.52	3.13142e-06	6.41133e-05
PA14_31540	1.79897	6.78825	148.591	3.36378e-09	6.26294e-07
hpaC	1.79311	4.04826	39.2849	1.48586e-05	0.000187161
PA14_48570	1.78699	6.68435	81.7967	1.79659e-07	9.18322e-06
PA14_57990	-1.78554	5.98774	111.271	2.38979e-08	2.41328e-06
PA14_47070	-1.78503	0.19893	3.06328	0.100437	0.18671
PA14_52250	-1.77899	5.19449	77.98	2.43923e-07	1.14433e-05
PA14_12300	-1.77818	7.48016	16.8447	0.000932544	0.00437144
antB	1.77594	2.58325	21.4671	0.000322298	0.0019241
PA14_08270	1.77485	4.08334	50.2127	3.6445e-06	7.04998e-05
PA14_70860	-1.7713	9.36379	54.9342	2.13633e-06	4.97198e-05
PA14_08020	1.77111	3.39082	23.2072	0.000224122	0.00145937
PA14_62360	-1.76453	3.72985	27.8157	9.25922e-05	0.000748527
PA14_33160	1.76305	8.45753	80.0622	2.06126e-07	1.02342e-05
PA14_01840	-1.76	3.12538	33.6479	3.45337e-05	0.000354168
PA14_08240	1.75916	6.20846	50.2601	3.62433e-06	7.04998e-05
PA14_00970	-1.75212	4.3627	81.2619	1.87386e-07	9.46139e-06
PA14_23420	-1.74905	11.3223	32.4382	4.19318e-05	0.000410904
PA14_55440	1.747	3.85753	37.9017	1.81174e-05	0.000217628
PA14_34740	-1.74657	4.28975	17.6116	0.000773279	0.0037857
PA14_65920	1.74552	2.91602	54.5986	2.21626e-06	5.07161e-05
coxA	1.74292	8.53151	113.683	2.07054e-08	2.20291e-06
PA14_31580	1.74278	6.32423	159.748	2.04213e-09	4.5063e-07
amtB	1.74117	7.593	166.74	1.5179e-09	3.76819e-07
PA14_08280	1.73389	4.62697	27.9921	8.96912e-05	0.000733032
astD	1.7335	6.60339	64.2969	8.19307e-07	2.61039e-05
PA14_05790	1.73343	4.8716	69.7818	4.92293e-07	1.81472e-05
PA14_01310	1.72711	6.3005	150.762	3.04442e-09	6.04622e-07
PA14_10640	1.72283	3.80186	31.7426	4.69929e-05	0.000449412
PA14_18370	1.72191	3.8959	22.1738	0.000277485	0.00170812
PA14_61020	1.72123	5.18759	22.7695	0.000245158	0.00156722
PA14_67310	1.71848	4.98026	79.1218	2.22309e-07	1.09464e-05
ureF	1.71714	3.1467	58.5986	1.44671e-06	3.7476e-05
PA14_25450	-1.71673	6.99389	35.4617	2.60507e-05	0.000285838
PA14_08660	1.71284	3.25066	18.478	0.000629349	0.00320758
zwf	-1.70795	7.70794	94.5279	7.02924e-08	4.86979e-06
PA14_51940	-1.70654	7.83404	51.2991	3.21205e-06	6.48727e-05
PA14_20470	1.70407	4.28255	11.7009	0.00377883	0.0132828
PA14_03710	-1.70082	6.81751	20.6144	0.000387717	0.00221054
cysD	-1.70073	9.36531	48.6126	4.40715e-06	7.99137e-05
opmD	1.6921	6.93475	122.425	1.25836e-08	1.56194e-06
PA14_26160	-1.68981	2.51854	24.3715	0.000177452	0.00123801
PA14_55430	1.68416	3.34835	19.6558	0.00047995	0.00261146
phnL	1.68363	4.25848	51.6405	3.08838e-06	6.34503e-05
PA14_27290	1.68363	0.446523	2.88422	0.110029	0.200291
PA14_10370	1.68252	5.82883	44.0123	7.83028e-06	0.00011781
PA14_51580	1.67931	3.33798	43.6153	8.24603e-06	0.000122214
mgtE	1.67911	8.43673	101.222	4.48159e-08	3.60829e-06
PA14_61140	1.673	4.21276	81.0153	1.91074e-07	9.56655e-06
hpaA	1.6703	5.96741	58.6468	1.4395e-06	3.74521e-05
hscB	-1.66942	7.06519	105.42	3.42415e-08	3.09107e-06
PA14_55490	1.66923	2.96754	20.6338	0.000386062	0.00220533
PA14_68130	1.66818	6.53294	29.6806	6.65799e-05	0.000585942
PA14_62330	-1.6594	5.86643	78.9943	2.24611e-07	1.09691e-05
PA14_11790	1.65844	6.23251	121.149	1.35051e-08	1.64211e-06
aruG	1.65828	6.8391	86.4464	1.25789e-07	7.00422e-06
PA14_65840	1.65794	2.31826	12.037	0.00341841	0.0122324
PA14_12310	-1.65763	5.85369	22.736	0.000246858	0.00157471
PA14_52490	1.6569	3.09909	40.9692	1.17517e-05	0.000158768
PA14_33250	-1.65561	4.84647	26.2512	0.000123549	0.000937713
PA14_13360	-1.65405	6.10131	123.886	1.16151e-08	1.47239e-06
PA14_62290	-1.65307	4.32033	28.0653	8.85186e-05	0.000728445
PA14_08230	1.65227	3.6461	35.7416	2.49647e-05	0.000275443
pfeS	-1.65183	5.36453	43.6503	8.20841e-06	0.000122115
PA14_53400	1.65167	5.54013	34.5428	3.00096e-05	0.000318712
orfJ	-1.65067	8.06464	21.1513	0.000344946	0.00201885
PA14_10490	-1.6489	5.12109	50.2714	3.6195e-06	7.04998e-05
PA14_23430	-1.64728	10.319	23.8232	0.000197896	0.00133529
PA14_70910	1.64543	12.141	6.3786	0.0232567	0.0568711
tonB	-1.63545	7.64661	62.5529	9.70631e-07	2.93554e-05
aspA	-1.63438	8.36121	42.5823	9.45024e-06	0.000134058
PA14_08090	1.63231	5.03615	56.902	1.72849e-06	4.3453e-05
pbpA	-1.63227	6.62482	56.7043	1.76521e-06	4.39789e-05
PA14_57610	1.62771	8.45646	81.7489	1.80335e-07	9.18322e-06
ibpA	-1.62746	9.84661	61.0342	1.12859e-06	3.1868e-05
PA14_41650	-1.62573	5.06502	71.7469	4.13506e-07	1.65347e-05
PA14_48600	1.62459	4.98035	38.164	1.74416e-05	0.000211361
hutU	1.62244	6.35954	149.479	3.2288e-09	6.20555e-07
PA14_54210	-1.61932	8.69834	51.6757	3.07595e-06	6.34503e-05
PA14_10200	-1.61828	6.54259	62.3706	9.88204e-07	2.9642e-05
PA14_62090	1.61739	12.1344	6.16396	0.0253124	0.0609339
PA14_08030	1.61419	4.94357	64.818	7.79423e-07	2.5376e-05
fpr	-1.61349	7.9858	50.2791	3.61625e-06	7.04998e-05
PA14_66350	1.60986	5.75705	127.553	9.53507e-09	1.29976e-06
PA14_37170	1.60794	5.28698	56.692	1.76751e-06	4.39789e-05
PA14_31510	1.60783	6.15979	53.7857	2.42435e-06	5.33701e-05
PA14_72960	1.60293	6.84168	33.6473	3.4537e-05	0.000354168
PA14_21090	-1.60135	0.979042	3.64545	0.0754791	0.148515
merE	1.6008	2.44717	15.8058	0.0012114	0.0053622
PA14_22340	1.5998	8.3753	25.8002	0.000134548	0.00100204
PA14_12920	-1.59952	6.26971	22.1522	0.000278746	0.00171374
PA14_04780	1.59803	6.85795	97.8818	5.59124e-08	4.21678e-06
gnyL	1.59601	7.26864	34.5892	2.97941e-05	0.00031838
PA14_10850	1.59562	5.85545	45.3718	6.57651e-06	0.000103658
PA14_55637	1.5946	12.1346	6.00522	0.0269684	0.0641942
phoR	-1.59418	6.029	62.62	9.64252e-07	2.93113e-05
PA14_54580	1.59303	4.52426	58.4819	1.46432e-06	3.77682e-05
PA14_44580	1.59145	6.74311	78.8676	2.26925e-07	1.0992e-05
PA14_02530	-1.58958	6.66038	15.8008	0.00121295	0.00536507
PA14_13220	1.58864	5.95155	28.3073	8.47618e-05	0.000708216
PA14_51950	-1.588	6.74091	30.8465	5.45654e-05	0.000500925
hpcD	1.5879	3.33494	31.2566	5.09406e-05	0.000477208
hslV	-1.58573	7.67481	49.8088	3.82185e-06	7.16055e-05
PA14_16100	1.58488	7.24901	50.7026	3.4418e-06	6.8813e-05
PA14_08100	1.5792	4.37759	32.8306	3.93508e-05	0.000390754
PA14_11230	1.57768	3.61206	21.6203	0.000311927	0.00187345
PA14_55510	1.57413	3.44223	65.1511	7.55078e-07	2.5097e-05
hpcC	1.57369	4.94693	33.5108	3.52928e-05	0.000359444
PA14_43190	1.57033	6.00545	187.341	6.74155e-10	2.13836e-07
PA14_61820	-1.56609	8.24616	143.22	4.33037e-09	7.33028e-07
mmsA	1.5642	8.9154	51.8177	3.02634e-06	6.32664e-05
PA14_61780	-1.56377	10.5546	132.499	7.36489e-09	1.12513e-06
PA14_68260	1.56344	9.90552	45.7443	6.27388e-06	0.000100507
PA14_01060	-1.56168	2.13804	4.44191	0.0522477	0.110465
PA14_73410	-1.56031	8.85302	114.353	1.99062e-08	2.15639e-06
orfL	-1.55931	9.87115	26.292	0.000122607	0.000932938
PA14_37745	1.55887	8.23503	53.7738	2.42754e-06	5.33701e-05
PA14_40610	-1.55542	1.01279	3.71702	0.105203	0.193356
PA14_40170	-1.55513	3.83578	54.7193	2.18714e-06	5.0693e-05
PA14_34610	-1.55463	1.44028	2.98296	0.10461	0.192782
aruF	1.55293	7.27942	70.4064	4.65544e-07	1.7667e-05
PA14_08220	1.55239	4.34566	28.0057	8.94722e-05	0.000732246
grpE	-1.54806	7.81233	56.3087	1.84134e-06	4.4962e-05
PA14_22370	1.54606	7.36925	49.357	4.03189e-06	7.4835e-05
hmuV	-1.54487	3.80697	36.5782	2.20137e-05	0.000249349
thiC	1.54481	7.41918	83.8296	1.53412e-07	8.08877e-06
dxr	-1.54417	7.05039	127.288	9.67023e-09	1.29976e-06
PA14_08210	1.5427	5.28561	39.7056	1.40031e-05	0.00018077
PA14_06430	1.53543	5.03782	23.0289	0.000232435	0.00150037
PA14_20960	1.52673	4.85274	31.9163	4.56673e-05	0.000438141
tonB2	-1.52583	2.48289	7.87126	0.0132782	0.036558
acsA	1.52524	10.3692	27.471	9.85725e-05	0.000782017
PA14_08010	1.52439	4.3586	27.5505	9.71554e-05	0.000773866
aroF	1.52193	4.08806	41.6243	1.0748e-05	0.000147211
PA14_29470	1.52123	6.44748	48.3385	4.55521e-06	8.10147e-05
PA14_33110	1.52065	2.60405	29.9981	6.30351e-05	0.000560542
PA14_12450	1.5204	7.18634	193.59	5.35728e-10	1.87757e-07
pelB	-1.51751	5.86111	40.7669	1.20829e-05	0.00016214
PA14_02390	-1.51722	5.36684	30.1078	6.18603e-05	0.000553398
fdnH	1.51627	7.92723	116.474	1.75977e-08	1.97825e-06
PA14_08070	1.51287	6.29314	47.731	4.9038e-06	8.49328e-05
PA14_42090	1.51273	6.71268	36.4834	2.23272e-05	0.00025242
PA14_23400	-1.51203	9.63844	26.4964	0.000118001	0.000903661
hpcB	1.51059	4.70955	48.0129	4.73843e-06	8.3241e-05
phzA2	1.5091	9.38471	31.6056	4.80695e-05	0.000456775
hmgA	1.50655	8.34789	142.749	4.42917e-09	7.33028e-07
PA14_08040	1.50502	4.18846	46.4952	5.71056e-06	9.37287e-05
orfM	-1.50444	9.47661	25.5949	0.000139919	0.00103686
PA14_08120	1.50403	6.66133	77.2971	2.57986e-07	1.19765e-05
PA14_08140	1.50294	1.9074	17.8706	0.00072666	0.0035929
ureG	1.50119	4.65853	73.9049	3.42991e-07	1.46378e-05
PA14_58580	-1.50043	5.44334	55.5318	2.00196e-06	4.75206e-05
PA14_42540	1.49911	0.579336	2.78455	0.115846	0.208083
PA14_49890	-1.49834	5.78085	96.0599	6.32599e-08	4.54099e-06
prpL	1.49822	9.4647	21.4331	0.000324652	0.00193554
phnE	1.49335	5.22427	38.1867	1.73844e-05	0.000211361
PA14_44950	1.49006	6.77568	68.2135	5.67494e-07	2.02463e-05
mreD	-1.48716	4.42983	22.7944	0.000243902	0.00156087
PA14_08190	1.48679	2.00086	7.12116	0.0174933	0.0452563
PA14_13370	-1.48183	5.12172	49.2859	4.0661e-06	7.4877e-05
PA14_08570	1.48083	12.0285	2.25171	0.154157	0.260631
PA14_01340	1.47995	5.21499	65.8192	7.08809e-07	2.39948e-05
PA14_28740	1.47573	0.372184	2.0265	0.174981	0.287043
PA14_52890	1.47473	0.531118	3.34608	0.0872511	0.166616
PA14_01750	1.47463	6.34129	130.394	8.21132e-09	1.19325e-06
PA14_08200	1.47355	2.3202	16.8136	0.000939755	0.00439832
PA14_37250	1.47351	9.9508	76.0847	2.85276e-07	1.28763e-05
PA14_47960	1.4721	3.25205	14.9471	0.00151493	0.00638777
msbA	-1.4721	7.71945	63.1862	9.12291e-07	2.80177e-05
hisS	-1.47169	7.82959	61.9395	1.0312e-06	3.00599e-05
PA14_11240	1.47093	4.75238	32.1097	4.42404e-05	0.000427203
lasB	1.4707	13.2383	32.4691	4.17215e-05	0.000409517
PA14_28980	-1.47008	2.90212	5.62974	0.0314103	0.0729019
PA14_44350	1.46553	5.69994	25.3429	0.000146848	0.00106309
PA14_19490	-1.4627	9.66966	20.2101	0.000423907	0.00237149
PA14_37210	1.46225	8.67269	94.1736	7.20423e-08	4.87759e-06
PA14_49310	1.46208	6.54382	64.7018	7.88124e-07	2.54461e-05
PA14_37370	1.46196	0.732725	6.08815	0.0333224	0.0765361
PA14_22380	1.46055	5.35936	22.0342	0.000285749	0.00174128
PA14_33070	1.45753	4.12244	30.3921	5.89295e-05	0.000530702
PA14_53790	1.4575	5.78948	102.27	4.18669e-08	3.58681e-06
PA14_28970	-1.45616	2.58036	12.4178	0.00305654	0.0111693
feoA	1.44879	2.50301	11.5803	0.00391859	0.0136692
PA14_66420	-1.44781	6.38004	48.0654	4.7083e-06	8.29943e-05
PA14_16290	1.44537	4.42238	39.5489	1.43151e-05	0.000183504
PA14_47920	1.44209	3.27674	21.3685	0.000329181	0.00194956
PA14_08150	1.44126	4.96057	52.2374	2.88493e-06	6.11686e-05
PA14_18680	-1.43967	7.45567	30.126	6.16668e-05	0.000552497
PA14_46120	1.43913	3.92965	49.1376	4.13859e-06	7.58699e-05
PA14_48610	1.43532	3.86766	69.3676	5.10997e-07	1.84516e-05
PA14_71070	1.43384	6.40764	56.0079	1.90173e-06	4.59479e-05
PA14_32720	-1.43369	3.89327	40.494	1.25465e-05	0.000165434
era	-1.43368	7.98225	41.1196	1.15123e-05	0.000156599
PA14_46110	1.43297	4.91048	35.8496	2.45598e-05	0.000272863
holB	-1.43029	6.09244	62.3516	9.90057e-07	2.9642e-05
PA14_07990	1.42915	3.1173	18.9813	0.000559845	0.00292756
PA14_21530	1.42819	5.75841	39.0312	1.54029e-05	0.000192391
PA14_14750	-1.42731	7.67601	68.4772	5.53987e-07	1.98835e-05
PA14_28070	-1.42433	5.64919	23.6826	0.000203562	0.00136119
PA14_47610	-1.4213	5.93796	38.4029	1.68509e-05	0.000207005
folK	-1.41998	4.9851	22.9863	0.000234468	0.00151023
PA14_00590	1.41857	5.06283	56.9981	1.71097e-06	4.31948e-05
PA14_34020	1.41463	2.04448	11.49	0.00402701	0.0139332
PA14_46830	1.41411	5.29063	25.8013	0.00013452	0.00100204
PA14_42960	1.40898	0.62277	3.44843	0.118068	0.211501
PA14_61130	1.40743	5.66376	36.2182	2.32322e-05	0.000260183
PA14_49580	1.40729	5.12376	34.0315	3.25061e-05	0.000339775
hslU	-1.40616	7.83509	30.1576	6.13344e-05	0.000550347
gdhB	1.40159	10.0128	74.4294	3.27982e-07	1.43685e-05
cdsA	-1.40096	6.39916	61.4944	1.07784e-06	3.08739e-05
PA14_61980	-1.40051	3.89809	31.1359	5.19784e-05	0.000483527
pth	-1.40032	6.45559	106.132	3.27451e-08	3.04836e-06
PA14_25470	-1.39937	5.13496	64.6753	7.90118e-07	2.54461e-05
xdhB	1.39905	7.55512	118.558	1.56211e-08	1.86141e-06
PA14_38900	1.39818	1.45503	8.26619	0.0151174	0.0403537
PA14_36990	-1.39791	1.43452	3.30265	0.0891351	0.16967
PA14_30050	1.39564	9.1021	43.8747	7.97162e-06	0.000119334
PA14_64550	1.39526	1.21582	2.59967	0.127658	0.225092
waaP	-1.39514	5.94083	55.9926	1.90486e-06	4.59479e-05
PA14_49900	-1.39491	6.11285	31.0447	5.27784e-05	0.000489042
PA14_19430	1.39339	5.05864	62.0142	1.0236e-06	3.00599e-05
pra	1.39298	8.51346	18.6959	0.000598119	0.00307471
PA14_56130	-1.39284	5.19477	89.1	1.0339e-07	6.11848e-06
PA14_39870	1.39244	6.51896	26.8113	0.000111284	0.000864447
PA14_53300	1.39107	5.69741	32.0724	4.45117e-05	0.000428434
PA14_14710	-1.38827	8.44432	56.4979	1.80447e-06	4.44257e-05
PA14_62060	1.38632	12.9896	2.75956	0.117363	0.210491
PA14_20980	1.3855	5.45057	29.5912	6.76192e-05	0.000593336
orfN	-1.38403	7.75694	27.0302	0.000106871	0.000835615
pstB	-1.38307	7.10025	24.0215	0.000190209	0.0013026
PA14_43180	1.3816	4.46958	39.9791	1.34771e-05	0.00017609
PA14_62400	-1.38148	8.11949	94.2514	7.16535e-08	4.87759e-06
PA14_33910	-1.38103	4.76807	39.4839	1.44467e-05	0.000184312
PA14_69320	-1.38097	7.74278	88.2706	1.09865e-07	6.32748e-06
PA14_55500	1.37871	2.09898	10.7075	0.00512566	0.0169565
hasD	-1.37657	1.58211	10.2306	0.00596227	0.0190269
PA14_24790	1.37214	9.1017	59.4774	1.32146e-06	3.50354e-05
ahpC	1.37111	11.6275	23.4944	0.000211433	0.00140124
PA14_42630	-1.36861	0.510145	1.9366	0.18427	0.299313
soxG	1.36358	1.99128	14.4017	0.00175247	0.00712837
PA14_02560	1.36094	3.32776	15.5546	0.00129236	0.00563981
PA14_34990	-1.35888	5.258	28.0903	8.81219e-05	0.000727422
PA14_08300	1.35455	7.05829	70.5329	4.60329e-07	1.7581e-05
PA14_32700	-1.35442	3.15931	19.484	0.000499	0.0026914
PA14_47040	-1.3504	5.15546	65.0823	7.60034e-07	2.5097e-05
PA14_10650	1.35024	3.33009	13.5943	0.00218639	0.00858136
PA14_65640	-1.3487	5.01921	76.2725	2.80843e-07	1.2773e-05
PA14_31960	-1.34805	4.82501	18.8807	0.000573007	0.00298164
PA14_61950	-1.33778	5.82474	40.6186	1.23323e-05	0.000164319
PA14_11530	-1.3368	4.22034	8.7283	0.00981935	0.02829
PA14_06000	1.33494	8.60924	51.9997	2.96406e-06	6.21826e-05
PA14_35160	1.33473	4.22751	23.8403	0.00019722	0.00133529
PA14_18810	-1.33286	5.80997	60.2592	1.2203e-06	3.34917e-05
PA14_38690	1.3323	5.06816	40.2959	1.28956e-05	0.000169233
PA14_52350	-1.3287	6.29532	45.7419	6.27576e-06	0.000100507
PA14_40010	1.32841	5.48949	60.8994	1.14396e-06	3.19988e-05
mrcB	-1.32673	7.40746	66.8352	6.44466e-07	2.25866e-05
phnK	1.32603	4.3607	22.5299	0.000257618	0.00161075
PA14_06880	-1.32419	6.36357	48.5694	4.43011e-06	7.99137e-05
PA14_00600	1.32294	5.66954	53.9794	2.37282e-06	5.27186e-05
PA14_44570	1.32156	5.11398	51.2378	3.23481e-06	6.51115e-05
nirN	-1.31884	6.30206	45.2435	6.68455e-06	0.000104807
PA14_55750	1.31832	7.49834	23.8976	0.000194973	0.00132306
arcC	1.31723	8.53307	26.2152	0.00012439	0.000942893
htpG	-1.31705	9.3889	37.7404	1.85477e-05	0.000221457
PA14_21570	1.3139	8.23102	24.7039	0.00016623	0.00118045
exaB	1.31378	1.25347	6.01106	0.0269053	0.064135
PA14_13840	-1.31378	3.51469	10.1371	0.0061439	0.0194848
PA14_55530	1.31201	4.34475	16.6794	0.000971564	0.00452586
ligD	1.3114	4.51485	26.733	0.000112912	0.000874546
PA14_23090	-1.31139	5.59594	73.3955	3.58318e-07	1.50342e-05
pilC	-1.311	9.4916	58.9431	1.39606e-06	3.66421e-05
PA14_01350	1.3104	4.13981	34.3987	3.06906e-05	0.000323637
fruA	1.30816	3.62533	27.5957	9.63612e-05	0.000769598
rnhB	-1.30811	6.14053	48.5516	4.43965e-06	7.99137e-05
PA14_40800	1.30799	3.80675	29.2023	7.23569e-05	0.00062524
PA14_55730	-1.30725	4.68777	34.2551	3.13862e-05	0.000328645
PA14_14810	-1.30713	6.67946	66.2948	6.77822e-07	2.34794e-05
PA14_06450	1.30434	6.76797	19.399	0.000508737	0.00272577
PA14_38560	1.30411	4.6028	39.085	1.52856e-05	0.000191327
PA14_23950	-1.30287	6.08146	27.3192	0.000101346	0.000799762
PA14_66140	-1.30275	6.3106	27.5303	9.75145e-05	0.000775689
PA14_71760	1.30241	4.53965	27.4087	9.96997e-05	0.000788859
PA14_73110	1.29873	6.63032	37.2833	1.98312e-05	0.000234433
fepC	-1.2983	3.64293	10.7348	0.00508198	0.0168401
aprD	1.29615	6.04577	54.6506	2.20368e-06	5.0693e-05
PA14_25960	1.29359	5.76715	38.8792	1.57397e-05	0.000196186
PA14_52510	1.29284	2.61096	17.2709	0.000839875	0.00404133
PA14_11760	1.29212	5.27149	60.3645	1.20735e-06	3.33654e-05
hisQ	1.29035	2.33972	11.1969	0.0044036	0.0149851
phnJ	1.29033	4.81516	47.3306	5.15013e-06	8.84279e-05
dnaK	-1.28778	10.4997	32.9403	3.86625e-05	0.00038845
fadH1	1.2869	7.28459	47.8199	4.85094e-06	8.47563e-05
PA14_11320	1.28553	4.12353	29.9232	6.38516e-05	0.000566956
pscE	-1.28311	0.513418	1.60338	0.260049	0.38968
PA14_01010	-1.28272	6.16693	16.4144	0.0010381	0.00475768
PA14_14740	-1.28181	7.74045	105.566	3.39284e-08	3.09107e-06
PA14_38990	1.28078	2.41591	12.2503	0.00320997	0.0116639
fabH2	1.27716	5.33443	23.6353	0.000205505	0.00136804
glcE	1.27663	3.13688	9.13071	0.00856038	0.0253115
PA14_40890	1.27627	6.607	25.9356	0.000131134	0.000984909
PA14_36090	1.27456	2.58574	12.0454	0.00340992	0.0122093
maiA	1.27375	6.15966	65.0492	7.6243e-07	2.5097e-05
PA14_13330	1.27338	6.00161	38.1799	1.74015e-05	0.000211361
mdcC	1.27337	1.55343	7.65325	0.0143692	0.038879
PA14_10360	-1.27317	13.3228	28.8805	7.65635e-05	0.000650735
pfpI	1.27235	7.79129	32.3493	4.25426e-05	0.000414164
fdnI	1.27184	6.5423	100.545	4.68463e-08	3.72147e-06
PA14_42770	-1.27134	4.24942	16.3978	0.00104242	0.00476696
PA14_46080	1.26929	3.47221	24.2405	0.00018211	0.00126164
glcD	1.2683	4.99907	14.2737	0.00181421	0.00734219
PA14_46100	1.26791	4.40873	31.1373	5.19661e-05	0.000483527
PA14_56250	1.26733	6.31534	43.6405	8.21887e-06	0.000122115
PA14_41790	1.26638	7.36228	19.4546	0.00050234	0.00270365
PA14_61990	-1.26537	6.42651	84.4224	1.46599e-07	7.80396e-06
PA14_12470	1.26475	4.47773	45.2584	6.67191e-06	0.000104807
PA14_13010	-1.26425	8.11679	17.1268	0.000869982	0.00414006
waaG	-1.26323	6.78235	21.4101	0.000326262	0.00193806
metK	1.26183	9.49567	55.3063	2.05151e-06	4.81695e-05
hcpC	-1.26078	4.24573	0.770736	0.393792	0.534323
lipA	1.26037	6.57645	18.0057	0.000703621	0.00349931
tmk	-1.2601	5.41551	17.3833	0.000817215	0.00395851
PA14_27740	1.26	5.06321	38.8409	1.58258e-05	0.000196438
PA14_53410	1.25983	4.472	42.7218	9.27658e-06	0.000132225
PA14_32670	1.25702	2.11951	9.22294	0.00829853	0.0246887
PA14_54660	1.25548	5.65181	49.7659	3.84125e-06	7.17434e-05
phnM	1.25407	5.37285	39.8873	1.36512e-05	0.000177197
PA14_61380	1.25394	9.57712	29.3163	7.09293e-05	0.000615133
PA14_51830	1.25366	10.7244	40.9797	1.17348e-05	0.000158768
PA14_49620	1.25315	2.41649	9.74156	0.00698625	0.0215386
PA14_66200	-1.25254	5.75789	18.7926	0.000584826	0.00302203
ntrC	1.25249	6.53184	102.169	4.21411e-08	3.58681e-06
rpsS	-1.24868	8.7841	27.8243	9.24479e-05	0.000748527
PA14_06460	1.24768	6.55932	16.9548	0.000907534	0.00428794
PA14_21640	1.2453	5.42076	59.9598	1.25797e-06	3.38367e-05
PA14_61760	1.2449	1.3477	2.74956	0.117976	0.2114
rplW	-1.24479	8.83687	26.7277	0.000113025	0.000874546
PA14_60150	1.24407	2.86786	6.33175	0.0236885	0.0576065
uvrC	-1.24187	7.09071	27.7244	9.41348e-05	0.000756111
PA14_44360	1.24124	6.06269	41.8965	1.03598e-05	0.000142879
PA14_22100	-1.24103	3.69166	12.6564	0.00285205	0.0106137
PA14_26750	1.23971	10.9797	61.9471	1.03043e-06	3.00599e-05
cyp23	1.23514	5.96383	71.0068	4.41369e-07	1.71488e-05
PA14_18160	1.23503	4.98695	36.9741	2.07564e-05	0.000241455
hasE	-1.23472	1.9789	2.25262	0.154079	0.260575
PA14_48730	1.23431	5.25469	47.7452	4.89533e-06	8.49328e-05
PA14_01860	-1.23197	3.11612	12.646	0.00286068	0.0106392
aroP2	1.23154	6.81018	99.6887	4.95663e-08	3.88574e-06
PA14_35880	1.23007	5.27396	46.0195	6.06041e-06	9.81193e-05
fxsA	-1.22919	6.58781	23.6658	0.000204249	0.00136273
PA14_63130	1.22804	4.82644	17.2996	0.000834026	0.00401708
PA14_73160	-1.228	5.50347	42.4631	9.60171e-06	0.000135671
PA14_07970	1.22566	1.15419	5.85138	0.0435261	0.0953413
PA14_27370	-1.22439	8.1401	96.2828	6.23046e-08	4.52696e-06
phaC1	1.22428	8.27316	76.802	2.68758e-07	1.23174e-05
nosL	-1.22389	4.53078	42.2572	9.86967e-06	0.000137713
PA14_58600	-1.22323	4.96247	27.7227	9.41649e-05	0.000756111
PA14_68890	-1.22222	4.58018	63.2022	9.10872e-07	2.80177e-05
PA14_53970	1.22216	7.29864	30.5485	5.73844e-05	0.000521183
PA14_32950	1.21986	5.42806	46.6767	5.58315e-06	9.24011e-05
iscS	-1.21888	9.41028	97.0826	5.90094e-08	4.34047e-06
PA14_55520	1.218	1.67655	5.78141	0.0295211	0.0693408
pvdO	-1.21776	4.96905	32.7868	3.96299e-05	0.000392218
PA14_11140	1.21613	6.76447	21.5255	0.000318304	0.0019042
PA14_48470	-1.21462	1.13219	2.08377	0.169369	0.279761
prfH	1.21397	3.27058	28.3887	8.35392e-05	0.000701023
orfH	-1.21291	9.97685	22.5988	0.00025396	0.00159777
PA14_09380	-1.21046	5.29093	45.1456	6.76835e-06	0.000105508
prfA	-1.20729	6.04181	32.5867	4.09332e-05	0.000402442
PA14_41020	1.20687	7.51801	36.9632	2.07899e-05	0.000241455
recO	-1.20649	4.77731	35.1353	2.73849e-05	0.000297735
PA14_55230	1.20332	2.95632	20.9857	0.000357532	0.00207417
aroQ2	-1.20328	1.83665	2.60555	0.127261	0.224724
PA14_56110	-1.20132	4.58747	31.3997	4.97405e-05	0.000469658
PA14_37200	1.20032	8.76229	61.9094	1.03429e-06	3.00599e-05
topA	-1.19989	10.2681	93.1275	7.7504e-08	5.07438e-06
PA14_01870	-1.19848	3.87573	19.2439	0.000527066	0.0028038
PA14_62350	-1.19743	6.95498	73.1691	3.65378e-07	1.50918e-05
PA14_12440	1.19576	5.47362	37.1325	2.02765e-05	0.000237809
rhlA	1.19418	10.5448	20.292	0.000416278	0.002342
PA14_68530	1.19414	4.36461	23.2979	0.000220024	0.00144476
groES	-1.19357	8.50467	33.4235	3.57863e-05	0.000363228
PA14_41730	-1.19327	7.53579	50.4293	3.55326e-06	7.03333e-05
PA14_73120	1.19181	7.88641	21.569	0.000315361	0.00189026
PA14_48020	1.19069	5.07705	17.4911	0.000796117	0.00387522
PA14_54640	1.18912	6.53444	59.9378	1.26079e-06	3.38367e-05
PA14_68280	1.18825	7.28818	49.8731	3.79297e-06	7.16055e-05
PA14_68140	1.18769	6.18683	23.7852	0.000199408	0.00133943
PA14_02890	1.18597	4.32912	52.8451	2.69325e-06	5.81391e-05
PA14_47950	1.18541	2.4166	11.6603	0.00382517	0.0134219
rplB	-1.18537	10.3738	30.0602	6.23664e-05	0.000556256
PA14_18800	-1.18453	6.08368	26.1841	0.000125119	0.000947216
PA14_19530	-1.18279	5.70109	7.28669	0.0164445	0.0430098
PA14_08600	1.18199	13.7646	4.24882	0.0569969	0.118862
pvdP	-1.1801	5.87085	43.1084	8.81368e-06	0.000127707
rplD	-1.17903	10.1376	20.1602	0.000428641	0.002389
PA14_24870	-1.17772	0.217248	0.79492	0.386652	0.526825
PA14_70880	1.17713	13.7578	4.2408	0.0572049	0.119254
motB	-1.17624	7.44761	24.5377	0.000171738	0.00121128
cpbD	1.17572	9.456	50.3248	3.59694e-06	7.04998e-05
PA14_55240	1.17402	3.40999	16.3749	0.00104845	0.00478305
leuD	1.17205	6.35232	46.7649	5.52237e-06	9.24011e-05
ansB	1.171	7.68666	60.378	1.20571e-06	3.33654e-05
PA14_04940	-1.16971	5.86124	28.4276	8.29611e-05	0.000699855
PA14_16260	1.16843	8.70547	49.9217	3.77132e-06	7.16055e-05
PA14_56990	1.1672	6.21243	49.8562	3.80053e-06	7.16055e-05
pgl	-1.16693	4.73651	22.6344	0.000252096	0.0015894
pvdN	-1.16571	4.76177	17.6158	0.000772493	0.00378549
PA14_20000	-1.16337	3.5943	15.9617	0.00116406	0.00519509
PA14_22960	-1.16207	5.17481	32.9292	3.87315e-05	0.000388489
PA14_48200	1.16198	2.4439	11.4233	0.00410937	0.0141688
rpmC	-1.1619	7.50755	25.8315	0.000133748	0.000998585
PA14_54680	1.15986	2.5729	14.8641	0.00154858	0.00649751
PA14_55570	1.1598	5.88794	25.6765	0.000137754	0.00102209
PA14_33760	-1.15909	5.40542	56.6705	1.77156e-06	4.39789e-05
PA14_18360	1.15848	2.7446	21.5877	0.000314104	0.00188463
PA14_19860	1.15758	5.44495	74.213	3.34083e-07	1.45289e-05
PA14_48740	1.15734	5.11109	36.7997	2.13001e-05	0.000245466
PA14_33600	-1.15727	6.22319	58.0462	1.53229e-06	3.93509e-05
hcnC	1.15623	7.16255	49.4355	3.99447e-06	7.4372e-05
lolA	-1.1533	6.64299	43.2407	8.66145e-06	0.000126178
orfK	-1.14958	10.1649	19.0069	0.000556544	0.00291756
PA14_25440	-1.14726	6.58771	15.7754	0.00122087	0.00539612
PA14_28050	1.14705	8.05143	39.5303	1.43526e-05	0.000183504
algA	1.14639	5.51929	7.46932	0.0153703	0.0408639
PA14_00960	-1.14639	3.74618	15.592	0.00127991	0.00559892
nirE	-1.14601	5.44894	24.4413	0.000175028	0.00122685
PA14_02610	1.14466	2.79844	9.44132	0.00771428	0.0232145
PA14_24380	-1.14333	4.52187	23.8111	0.000198375	0.00133701
PA14_33460	1.14333	4.55297	9.70719	0.00706548	0.0217102
PA14_60350	-1.14321	6.06631	48.1503	4.66012e-06	8.23887e-05
PA14_08130	1.14271	5.13358	32.5997	4.08473e-05	0.000402261
PA14_52480	1.1426	3.00364	9.48615	0.00760025	0.022951
PA14_70490	-1.14163	5.66495	42.6799	9.32832e-06	0.000132645
rplL	-1.13802	10.2104	70.0859	4.79059e-07	1.80648e-05
PA14_06960	1.1368	5.71683	49.877	3.79124e-06	7.16055e-05
adhA	1.13633	8.96258	38.0805	1.76535e-05	0.000213345
PA14_10950	1.13576	2.41749	12.5496	0.00294154	0.0108653
PA14_62300	-1.13376	5.54031	48.3769	4.5341e-06	8.08807e-05
PA14_28540	1.13139	3.00721	5.6693	0.0309043	0.0720376
rpsC	-1.13086	10.1577	32.368	4.24136e-05	0.000413584
PA14_62070	1.12792	0.975756	1.9142	0.186681	0.301748
PA14_59410	1.12756	2.88627	15.0184	0.00148665	0.00630873
PA14_72370	1.12604	7.79234	4.31414	0.0553359	0.115803
PA14_61350	1.12541	3.21532	12.0038	0.00345215	0.0123087
mutL	-1.12477	7.58131	35.1073	2.75027e-05	0.000298472
rhl	-1.12431	8.26782	59.9988	1.25299e-06	3.38367e-05
wbpM	-1.12427	9.67908	47.2273	5.21595e-06	8.93006e-05
PA14_34820	1.12398	4.84579	40.1971	1.30739e-05	0.000171196
PA14_67280	1.12335	4.86718	42.0055	1.02089e-05	0.000141782
cysN	-1.12275	8.15733	20.2505	0.000420121	0.00235695
PA14_38840	1.12163	3.50761	9.76715	0.00692793	0.0213979
PA14_13450	-1.12126	3.66878	19.018	0.000555127	0.00291756
eutB	1.12108	6.36551	84.682	1.43723e-07	7.80396e-06
PA14_27140	-1.12073	4.69013	22.2383	0.000273762	0.00169199
pscL	-1.11871	2.14786	2.98102	0.104713	0.192814
rplS	-1.11708	9.49626	25.5249	0.000141805	0.00104156
PA14_07550	-1.11616	6.93381	46.8306	5.47764e-06	9.21093e-05
PA14_49570	1.11425	4.91615	10.9483	0.00475482	0.0159511
hflC	-1.11387	9.23872	46.6867	5.57624e-06	9.24011e-05
PA14_54670	1.11352	6.2832	42.8741	9.09106e-06	0.000130795
PA14_63730	1.11278	3.94532	16.5122	0.00101295	0.00466756
PA14_71150	-1.11096	0.315677	1.47741	0.242907	0.369194
PA14_06480	1.109	6.67794	12.8011	0.00273569	0.0102834
rplV	-1.10847	9.14981	31.3225	5.03836e-05	0.000474977
PA14_72930	-1.10835	7.35026	69.6292	4.99094e-07	1.8243e-05
PA14_50880	1.1081	9.44443	31.516	4.87882e-05	0.000462866
PA14_56140	-1.10673	4.42361	17.1008	0.000875543	0.00416319
PA14_33540	-1.10655	3.87715	19.1803	0.000534806	0.00282982
PA14_48750	1.10644	3.85943	28.4679	8.2368e-05	0.000696097
PA14_20480	1.10568	5.70626	6.93101	0.0187946	0.0479154
PA14_47860	1.10492	3.07607	16.8962	0.000920747	0.00433661
PA14_53690	1.10399	1.36597	4.19782	0.063154	0.128772
pilB	-1.10367	9.05497	66.0188	6.95616e-07	2.36827e-05
pvdG	-1.1023	3.77315	7.92499	0.0130241	0.0359442
pcaF	1.10155	3.40952	36.1794	2.33681e-05	0.000261214
PA14_54120	1.10103	2.16274	8.77126	0.00967529	0.0280872
PA14_01020	-1.10086	7.1978	19.7838	0.000466294	0.00255818
secF	-1.09918	7.73658	71.5335	4.2133e-07	1.67352e-05
PA14_72650	1.09906	6.00477	104.052	3.73406e-08	3.27169e-06
PA14_38000	-1.09724	2.67277	7.51472	0.0151159	0.0403537
rplJ	-1.09633	10.4091	36.5878	2.19823e-05	0.000249349
rplN	-1.09592	8.82548	40.7919	1.20414e-05	0.000161947
xcpQ	-1.09588	8.43461	11.9442	0.00351379	0.0125061
glmM	-1.09577	8.66567	25.171	0.000151797	0.00109096
ntrB	1.09457	6.84244	54.2293	2.30817e-06	5.16995e-05
PA14_18660	-1.09286	8.40568	32.3032	4.2864e-05	0.000415934
rpsQ	-1.09283	8.00085	53.2474	2.5743e-06	5.6182e-05
pscO	1.09276	1.17201	1.33857	0.265324	0.396191
pobA	1.09262	3.28041	18.7032	0.000597103	0.00307214
pilD	-1.09246	6.59793	39.5413	1.43304e-05	0.000183504
PA14_34670	1.09139	6.07718	23.4014	0.000215448	0.00142469
pqqF	1.09094	4.16299	30.8983	5.40917e-05	0.000498112
PA14_31480	1.08971	5.81767	63.5708	8.78803e-07	2.72704e-05
PA14_66400	-1.08837	7.63078	59.4654	1.32309e-06	3.50354e-05
PA14_66990	-1.08708	4.4898	11.5945	0.00390184	0.0136347
PA14_24330	-1.08613	7.92516	73.4403	3.56942e-07	1.50342e-05
PA14_66210	-1.08528	6.83952	20.7504	0.000376338	0.00216586
argD	1.08503	8.17856	47.5044	5.04153e-06	8.70651e-05
PA14_65810	1.08491	3.39046	25.986	0.000129887	0.000977774
ppc	1.08466	7.23971	161.014	1.93369e-09	4.43113e-07
PA14_15240	-1.08416	1.60208	2.39352	0.142611	0.245201
glcB	1.08232	9.10787	53.971	2.37502e-06	5.27186e-05
mtlY	-1.08228	1.90928	10.9505	0.00726727	0.0221702
PA14_41500	1.08219	7.7266	21.1378	0.000345948	0.00202185
PA14_12330	-1.08164	7.8006	15.0963	0.00145648	0.00621613
aruB	1.08089	7.69265	64.9775	7.67659e-07	2.51303e-05
icp	-1.08085	4.28831	25.5195	0.000141951	0.00104156
PA14_10080	1.08046	2.8168	9.09837	0.00865441	0.0255642
PA14_57600	1.07963	7.01219	52.3443	2.85012e-06	6.06464e-05
fdnG	1.0786	10.4659	78.6128	2.31664e-07	1.11311e-05
arcD	1.07791	9.73288	23.7992	0.00019885	0.00133719
PA14_10940	1.07689	5.41775	48.3895	4.52724e-06	8.08807e-05
PA14_62390	-1.07667	8.01798	66.1462	6.87339e-07	2.35393e-05
phhB	1.07526	8.11439	94.9092	6.84624e-08	4.79881e-06
PA14_70770	-1.07508	6.78968	20.0283	0.00044143	0.00245339
PA14_34840	1.0749	6.8666	47.4015	5.10548e-06	8.79146e-05
atoB	1.07444	7.29375	18.4278	0.000636813	0.00324008
PA14_33290	1.07442	8.1952	67.7423	5.92574e-07	2.10152e-05
PA14_46660	-1.07364	3.95089	23.9285	0.000193771	0.00131852
glpD	-1.07229	10.2779	43.1854	8.72477e-06	0.000126786
ispG	-1.06997	7.95153	53.6512	2.46086e-06	5.39038e-05
PA14_10480	-1.06878	5.49724	30.3883	5.89668e-05	0.000530702
PA14_48000	1.06846	3.1001	12.9851	0.00259544	0.00986833
PA14_54690	1.06809	4.25373	27.5112	9.78538e-05	0.000777351
glpT	-1.06773	7.27971	73.8721	3.43956e-07	1.46378e-05
rplP	-1.06694	9.27221	24.7882	0.000163515	0.00116256
PA14_47420	1.06559	4.48143	17.755	0.000747061	0.00368155
PA14_20940	1.06542	4.91718	44.7207	7.14605e-06	0.00010889
PA14_68510	1.06488	4.33675	17.1662	0.000861623	0.00411342
PA14_51590	1.06466	6.91502	43.3506	8.53716e-06	0.000124974
PA14_16820	1.06451	7.38881	36.2325	2.31822e-05	0.000260112
PA14_17170	-1.06442	8.72533	73.2424	3.63076e-07	1.50918e-05
PA14_01180	-1.06412	3.85898	13.8363	0.00204462	0.0081145
PA14_30370	-1.06214	5.1689	15.3883	0.00134935	0.00584259
PA14_16370	-1.06173	6.30084	33.706	3.42173e-05	0.000352101
PA14_01040	-1.06135	3.9502	6.27719	0.0242029	0.0586899
PA14_16300	1.06106	1.45764	1.61915	0.222522	0.345078
eno	-1.06072	9.63068	65.7043	7.16529e-07	2.41191e-05
rplA	-1.05977	10.9545	25.9824	0.000129976	0.000977774
PA14_67270	1.05798	5.02889	57.9674	1.54497e-06	3.95061e-05
PA14_22740	1.05765	4.81717	20.9652	0.000359133	0.00207941
PA14_13350	-1.0576	6.88869	20.625	0.000386812	0.0022075
PA14_00940	-1.05752	4.44878	10.6865	0.00515958	0.017017
PA14_45910	1.05745	3.54584	26.7091	0.000113416	0.000876433
PA14_13600	1.05742	5.43514	10.923	0.00479232	0.0160408
PA14_19020	-1.05711	4.64783	19.9341	0.000450831	0.0024917
PA14_33900	1.05697	6.45305	57.3984	1.64007e-06	4.17587e-05
lpxD	-1.05523	8.32989	45.4232	6.53378e-06	0.000103258
mucC	-1.05474	6.97929	10.8393	0.00491873	0.0163924
napB	1.05386	4.28052	24.1159	0.000186669	0.00128131
PA14_31950	-1.0535	4.60199	72.5551	3.85333e-07	1.55123e-05
PA14_71170	1.05177	3.55424	20.8165	0.000370943	0.00214363
PA14_39990	1.05121	6.16563	28.1802	8.67118e-05	0.000719539
PA14_19010	-1.05039	3.70533	20.4179	0.000404852	0.00229506
PA14_07410	-1.04826	1.91396	3.10789	0.0982063	0.183191
PA14_04850	-1.04681	2.56278	10.2075	0.00600658	0.0191376
PA14_30040	1.04543	6.24386	17.0813	0.000879748	0.00417639
PA14_29320	-1.0448	4.23154	7.94275	0.0129414	0.0357961
PA14_39020	1.04372	3.1867	16.8475	0.000931901	0.00437144
dadA	1.04332	7.91721	38.255	1.72138e-05	0.000210595
cysH	-1.04284	6.07191	15.8453	0.00119921	0.00531615
pelA	-1.04097	6.84184	47.9924	4.75024e-06	8.3241e-05
PA14_35150	1.04077	4.7883	18.0891	0.000689812	0.0034479
PA14_21970	-1.04009	4.63212	19.364	0.000512806	0.00274264
nth	-1.04002	4.99016	51.3588	3.19002e-06	6.48674e-05
mdcD	1.03995	3.88328	10.7701	0.00502615	0.0167108
groEL	-1.03979	11.4351	16.2329	0.00108663	0.00490465
cyoC	1.03952	4.47945	17.1896	0.000856704	0.00410169
PA14_14280	1.03893	6.01786	52.8805	2.68254e-06	5.81184e-05
PA14_72360	1.03843	7.72685	2.98221	0.10465	0.192796
PA14_44340	1.03749	7.3609	23.6573	0.0002046	0.00136354
PA14_57060	-1.03739	7.44944	41.4908	1.09444e-05	0.000149557
PA14_40230	-1.0373	6.75329	66.1444	6.87452e-07	2.35393e-05
PA14_40240	-1.03686	6.78796	74.8461	3.16586e-07	1.40763e-05
argG	-1.03669	8.48575	43.0935	8.83105e-06	0.000127707
catR	1.03654	2.9889	15.7204	0.00123825	0.00546078
PA14_67260	1.03621	4.94479	22.1865	0.000276751	0.00170692
PA14_01120	-1.03484	2.97422	3.21255	0.093201	0.175781
PA14_08000	1.03407	5.18964	14.4036	0.00175158	0.00712837
PA14_43140	-1.03341	2.86388	2.82911	0.113201	0.204813
PA14_44800	1.032	5.52586	52.1646	2.9089e-06	6.1241e-05
coxB	1.03119	10.1859	35.5813	2.55801e-05	0.000281193
PA14_09610	1.03105	4.85382	11.4199	0.00411372	0.0141756
tgt	-1.02974	6.25196	30.3975	5.88746e-05	0.000530702
rplK	-1.02944	10.566	60.9533	1.13779e-06	3.19761e-05
PA14_47930	1.02914	3.27586	18.6728	0.000601353	0.00308601
PA14_34680	1.02842	6.78412	20.4973	0.000397826	0.00226169
orfE	-1.02599	8.72874	8.73848	0.00978499	0.028273
murI	-1.02491	5.34428	11.0914	0.00454885	0.0154076
PA14_65570	-1.02457	7.73621	33.4922	3.53972e-05	0.000359892
PA14_35770	-1.02424	8.70127	15.3692	0.00135606	0.00585466
PA14_33750	-1.02423	4.34356	12.1018	0.00335348	0.0120725
PA14_52465	1.0238	2.59958	5.39098	0.0346765	0.0790066
PA14_61680	-1.02368	5.0649	10.162	0.00609501	0.0193675
capB	-1.02338	11.5557	7.93771	0.0129648	0.0358442
mdoH	-1.02329	8.75294	29.8432	6.47367e-05	0.000573107
lepB	-1.02236	8.57828	49.9889	3.74157e-06	7.16055e-05
PA14_23490	1.02229	1.73435	1.66107	0.271932	0.403329
bioA	1.02144	6.47099	35.755	2.49143e-05	0.000275397
PA14_33080	1.02047	2.87275	12.2134	0.00324503	0.011746
rho	-1.01993	11.0312	27.361	0.000100573	0.000794712
PA14_37100	1.01962	2.87649	11.9693	0.00397495	0.0138092
PA14_33240	-1.01919	4.5133	25.7692	0.000135344	0.00100672
rpmG	-1.01905	9.3163	19.1575	0.0005376	0.00284061
parE	-1.01712	7.20517	33.8544	3.34245e-05	0.000345136
fadD2	1.01696	8.00603	42.7778	9.2078e-06	0.000131875
PA14_31500	1.01665	7.87982	36.2417	2.31502e-05	0.000260112
PA14_40200	1.01615	7.44667	30.6731	5.61858e-05	0.000512303
wbpY	-1.01573	6.35195	29.1848	7.2578e-05	0.00062524
PA14_51620	1.01528	5.05195	34.301	3.11619e-05	0.000327447
PA14_40660	-1.01489	3.35992	4.43622	0.052381	0.110669
PA14_46890	1.01399	6.71957	19.2881	0.000521769	0.00278059
exsB	1.01392	3.92158	21.2258	0.000339446	0.00199273
PA14_24820	1.01307	3.32017	24.4212	0.000175721	0.00122918
PA14_18820	-1.01263	3.15223	19.6832	0.00118367	0.00525676
ispD	-1.0119	5.60424	12.8994	0.00265974	0.0100806
rbsA	1.0117	7.54077	84.6459	1.44119e-07	7.80396e-06
PA14_10740	1.01044	6.19603	41.1028	1.15387e-05	0.0001566
PA14_46920	1.00967	5.96903	33.0328	3.80918e-05	0.000383363
PA14_32280	1.0093	6.03517	23.2494	0.000222201	0.00145162
PA14_62180	-1.00887	5.34858	26.6368	0.000114951	0.000882573
PA14_19990	-1.00849	3.25622	4.44987	0.0520622	0.110112
PA14_13500	1.00718	4.51685	40.4194	1.26767e-05	0.000166728
rodA	-1.00652	6.26392	71.266	4.31376e-07	1.70208e-05
PA14_25430	-1.00604	7.68203	14.4011	0.00175278	0.00712837
PA14_37260	1.0058	8.40126	36.6112	2.19055e-05	0.000249349
PA14_28080	1.00516	1.21822	1.27988	0.275631	0.407395
surA	-1.00471	8.45546	36.5804	2.20063e-05	0.000249349
PA14_61960	-1.00451	4.59671	37.8004	1.83862e-05	0.00021997
PA14_23690	-1.00411	4.56012	9.85406	0.00673394	0.0209143
PA14_06420	1.00373	5.75911	18.3722	0.000645178	0.00326868
PA14_05040	-1.00266	4.09976	25.8839	0.000132425	0.000991192
PA14_21540	1.0022	8.32988	55.2071	2.07375e-06	4.84526e-05
pmrA	1.00174	4.92258	42.3568	9.73892e-06	0.000136795
PA14_26720	1.00153	10.1003	19.9182	0.000452432	0.00249823
PA14_37830	-1.00084	6.35194	14.7395	0.00160074	0.00666005
PA14_36900	1.00077	0.74724	1.47125	0.243848	0.370246
PA14_62670	-1.00014	5.54638	10.0765	0.00626513	0.0197292
PA14_25940	1.00006	7.20863	61.7049	1.05549e-06	3.05273e-05
cpo	0.999516	6.45326	25.2039	0.000150834	0.00108535
anmK	-0.999259	7.14829	44.2969	7.54681e-06	0.000114122
PA14_72660	0.998698	6.32893	34.4931	3.02423e-05	0.000320611
PA14_07980	0.998669	4.10157	9.01787	0.0088937	0.0261285
PA14_24830	0.997681	3.09104	28.1115	8.77872e-05	0.000726439
PA14_11490	-0.996956	5.13777	25.4831	0.000142946	0.00104628
PA14_22220	-0.996204	3.23307	7.968	0.0128248	0.0355561
rpmF	-0.995756	9.85346	25.9191	0.000131544	0.000985835
PA14_33730	-0.99463	5.54719	19.1947	0.000533044	0.00282661
nosF	-0.994553	4.58206	11.5702	0.00393051	0.0137013
PA14_63330	0.993823	4.7331	28.6517	7.97219e-05	0.000675652
thiI	-0.99228	6.97071	43.9393	7.90492e-06	0.000118634
rpoS	0.9915	10.7546	21.2253	0.000339479	0.00199273
PA14_48330	0.989354	2.18364	8.53629	0.010494	0.029887
PA14_66120	-0.988028	6.83892	18.9624	0.000562289	0.00293393
PA14_57950	0.986155	11.0947	24.5145	0.000172522	0.001215
PA14_35030	-0.984847	1.24007	1.99915	0.221665	0.344347
PA14_62270	-0.983952	5.33647	42.3374	9.76426e-06	0.000136795
PA14_31080	0.9839	0.737097	1.76033	0.204367	0.323233
PA14_29230	0.983774	5.39514	36.8653	2.10937e-05	0.000244031
PA14_18900	-0.982975	3.08943	6.015	0.0268628	0.0641221
prpC	0.982319	7.78996	23.4238	0.000214475	0.00141983
fdhE	0.982264	5.28076	24.5037	0.000172891	0.00121615
PA14_43730	-0.980898	4.36073	10.0898	0.00623827	0.0196955
PA14_39820	-0.98059	3.72917	26.9532	0.000108401	0.000846466
PA14_67340	0.980477	4.59486	17.4176	0.000810431	0.00393204
PA14_38930	0.980346	4.09363	22.5662	0.000255687	0.00160356
PA14_16730	-0.979621	6.19959	14.1832	0.00185935	0.00748009
PA14_39860	0.977523	6.00679	15.162	0.00143153	0.00613161
typA	-0.976996	8.55352	32.3918	4.22492e-05	0.000412657
PA14_12050	-0.975442	5.40175	35.6341	2.53756e-05	0.00027946
purD	-0.97535	6.1543	39.3396	1.4744e-05	0.000186699
PA14_48860	-0.975037	5.71239	16.1264	0.00111631	0.00501581
PA14_73140	0.974988	8.51558	54.6804	2.19649e-06	5.0693e-05
PA14_53820	0.973465	5.34844	34.6612	2.94632e-05	0.000315722
PA14_07660	0.973288	9.72296	65.2235	7.49903e-07	2.5097e-05
PA14_00925	-0.972812	3.55644	7.37155	0.015935	0.0420835
PA14_40900	0.972248	3.33481	15.44	0.00133133	0.00577328
PA14_30360	-0.971458	6.94515	29.0388	7.446e-05	0.000637403
betB	0.971056	6.61868	32.8347	3.9325e-05	0.000390754
secY	-0.97066	11.3499	34.561	2.99249e-05	0.00031838
PA14_48640	0.968448	3.18913	19.0051	0.000556775	0.00291756
hcnB	0.967314	7.17812	27.1445	0.000104646	0.000821447
PA14_39500	-0.966395	3.21755	9.7383	0.00699371	0.0215452
rpmD	-0.965803	8.47635	22.6798	0.00024974	0.00158327
PA14_63860	0.965678	2.15992	8.11041	0.0121893	0.0339998
fabD	0.963677	8.47813	16.0734	0.00113143	0.00507612
PA14_01330	0.963523	5.65622	43.4012	8.48064e-06	0.000124452
PA14_60780	-0.962781	3.7909	20.7068	0.000379944	0.00218083
wbpX	-0.960689	7.30414	37.9104	1.80945e-05	0.000217628
PA14_09820	0.960412	7.2843	55.3958	2.03168e-06	4.80348e-05
rpmJ_1	-0.959233	6.74348	46.9895	5.37105e-06	9.11701e-05
queA	-0.958465	5.57093	41.7158	1.06157e-05	0.000145734
PA14_55080	0.958283	9.056	35.1631	2.72683e-05	0.00029701
PA14_08690	0.957004	0.661384	1.10793	0.309144	0.445544
PA14_31370	0.956103	6.17633	21.0722	0.000350891	0.00204361
PA14_12960	0.955862	1.73072	4.99932	0.0409297	0.0907215
msrA	0.955624	6.88978	55.2971	2.05355e-06	4.81695e-05
algF	0.955549	3.00649	12.8469	0.00270003	0.0102009
sahH	0.954741	8.97537	30.9892	5.32722e-05	0.000492851
PA14_72060	0.954712	6.69732	14.8065	0.00157244	0.00655604
gabT	0.953375	8.66823	21.6861	0.00030759	0.00185161
PA14_47850	0.953331	2.97472	6.64534	0.0209652	0.0522201
PA14_41200	0.952426	3.8875	3.08609	0.099289	0.184958
phhC	0.952237	8.82092	51.7813	3.03896e-06	6.33082e-05
lspA	-0.952032	5.94936	16.3965	0.00104277	0.00476696
PA14_14270	0.951339	7.36491	26.0414	0.000128533	0.000970596
PA14_33370	0.949927	2.07469	5.25503	0.0367119	0.0829996
pvcD	-0.949438	1.68325	1.98017	0.179693	0.293157
PA14_31430	-0.948951	6.20569	44.036	7.8062e-06	0.000117745
PA14_19720	-0.948769	4.05238	7.15537	0.0172704	0.0448092
prs	-0.948011	9.63986	37.0637	2.04834e-05	0.000239597
aprE	0.9479	6.16337	22.4123	0.000263995	0.00164025
dacC	-0.94783	7.98145	28.0182	8.92713e-05	0.000731607
PA14_13910	0.947708	1.36844	2.49474	0.135015	0.235763
PA14_29240	0.947428	5.17302	25.444	0.00014402	0.0010522
PA14_26730	0.947304	9.72159	25.4281	0.000144462	0.0010522
PA14_33570	-0.946658	3.64613	5.56468	0.0322635	0.0745639
PA14_02680	0.946384	2.38453	6.41957	0.0228866	0.0561146
PA14_63440	-0.946231	2.89447	2.24095	0.155079	0.261894
xerC	-0.946108	4.19097	8.59726	0.0102742	0.0293451
PA14_15530	0.945957	2.06358	6.81015	0.0196797	0.0497039
PA14_36920	0.945219	3.28115	3.44633	0.0830807	0.159676
rnpA	-0.945047	9.40895	70.9586	4.43256e-07	1.71488e-05
PA14_49040	-0.94382	5.07193	16.938	0.000911294	0.00430229
kdpC	0.943787	0.276538	0.917595	0.353247	0.492429
PA14_51910	-0.943102	6.8945	22.2459	0.00027333	0.00169107
motD	-0.94221	7.25564	26.6672	0.000114302	0.000880996
PA14_38210	-0.94185	3.60967	9.63643	0.00723184	0.0220847
pqqB	0.941295	5.57546	33.7445	3.40096e-05	0.00035057
murB	-0.941233	5.79029	33.0702	3.78641e-05	0.000381716
hcpA	0.940697	4.66652	1.02255	0.327901	0.464709
PA14_50310	-0.938612	5.4443	12.8071	0.00273095	0.0102721
PA14_40020	0.937729	5.48975	36.7263	2.15335e-05	0.0002472
hisC2	-0.937711	6.4381	14.5072	0.00170339	0.00697034
PA14_00360	0.937549	2.37981	8.89958	0.00925921	0.0270026
fabF2	0.937315	4.79813	32.881	3.9033e-05	0.000389074
PA14_47110	0.937158	5.20221	47.0635	5.32221e-06	9.05993e-05
PA14_43170	-0.936655	5.72053	31.0653	5.25961e-05	0.000488112
PA14_43550	0.93655	5.76466	37.6012	1.89282e-05	0.000225548
PA14_14910	-0.936317	7.94011	27.7301	9.40383e-05	0.000756111
rne	-0.936306	9.81028	34.4814	3.02976e-05	0.000320627
PA14_28600	0.935989	6.55661	6.32857	0.023718	0.0576549
tatC	-0.934523	5.49611	7.33527	0.0161506	0.0424835
PA14_48760	0.933713	6.88035	16.2275	0.00108812	0.00490768
PA14_21580	0.933217	9.05508	11.9543	0.00350328	0.0124836
PA14_05300	-0.933087	5.02147	16.8752	0.000925545	0.00435233
PA14_49070	0.932719	4.90862	10.9701	0.00472276	0.0158883
PA14_43440	-0.93202	2.14669	2.31598	0.148786	0.253689
glmS	-0.931124	8.09718	23.1666	0.000225984	0.00146828
rpoA	-0.930986	10.8124	18.0447	0.000697121	0.00347569
folP	-0.930645	7.26832	11.6028	0.00389205	0.0136085
PA14_28220	-0.928715	4.78764	26.9049	0.000109371	0.000852925
PA14_49530	-0.928304	3.00828	15.7765	0.00252619	0.0096543
PA14_65630	-0.92816	4.71377	16.0499	0.00113821	0.00509882
spoT	-0.928129	8.78826	25.7095	0.00013689	0.00101695
PA14_26580	0.927648	2.69595	12.3352	0.00313114	0.0113961
PA14_30900	0.927574	1.33963	1.8035	0.199198	0.316908
PA14_09730	0.927148	1.83485	2.56691	0.141006	0.243228
PA14_37640	0.926615	3.96697	14.4298	0.00173924	0.00709752
dtd	-0.926052	8.26227	30.9556	5.3574e-05	0.000494108
PA14_46850	0.92577	4.32865	21.6676	0.000308802	0.00185655
PA14_53600	-0.925753	6.45022	10.311	0.0058109	0.0186638
PA14_18350	0.925177	4.25226	7.45103	0.0154741	0.0411034
PA14_66020	0.924711	5.49151	18.7274	0.00059375	0.00306018
PA14_20570	0.924642	5.68098	38.2214	1.72975e-05	0.000211186
nosD	-0.922721	6.04049	18.2834	0.000658825	0.00332933
PA14_03490	0.922705	5.16505	11.7361	0.00373905	0.0131584
nusG	-0.922621	10.3401	70.8678	4.46838e-07	1.71759e-05
PA14_34730	-0.92261	5.57396	7.82812	0.0134863	0.0369262
PA14_05970	-0.921808	6.1895	14.7232	0.00160769	0.00667499
PA14_36520	0.920856	8.55935	10.7218	0.00510279	0.0168903
PA14_28960	0.920491	5.58486	17.144	0.000866318	0.00412974
PA14_49710	0.920111	5.11408	24.0353	0.000189687	0.00130052
PA14_27880	-0.920017	2.90325	5.32029	0.0357179	0.0811622
PA14_66190	-0.919492	6.6664	28.0445	8.88501e-05	0.000729254
rpsE	-0.919436	10.3782	22.6736	0.000250059	0.00158327
PA14_31360	0.918993	5.57072	12.0678	0.00338735	0.0121589
PA14_49150	-0.918684	4.84036	60.1574	1.23296e-06	3.35432e-05
norC	-0.917016	9.37539	33.861	3.33901e-05	0.000345136
PA14_64520	0.916803	9.01507	9.44556	0.00770341	0.0232037
PA14_60090	-0.915344	7.89099	12.4119	0.00306179	0.0111693
PA14_47090	0.915293	7.39987	21.4156	0.000325876	0.00193806
PA14_64740	0.915209	4.75261	32.279	4.30333e-05	0.000416792
PA14_67790	-0.915142	7.08161	58.8563	1.40863e-06	3.68098e-05
PA14_52370	-0.915121	6.82964	55.8129	1.94207e-06	4.65213e-05
gatB	-0.91478	7.40807	39.3173	1.47905e-05	0.000186699
PA14_46750	0.914778	4.91352	42.97	8.97641e-06	0.000129495
mtgA	-0.914629	4.85721	17.8002	0.000739009	0.0036479
PA14_03760	-0.914541	3.45276	16.235	0.00108604	0.00490465
PA14_21175	0.91352	6.56568	38.3811	1.69039e-05	0.000207229
PA14_21010	0.912731	5.73428	22.0993	0.000281861	0.00172117
trxB2	0.912363	8.28735	18.2966	0.000656775	0.00332179
PA14_06200	0.912203	0.977277	1.14844	0.300764	0.436211
PA14_57900	-0.911151	6.95962	43.4243	8.45497e-06	0.000124382
PA14_20240	-0.911141	2.51845	2.4578	0.137729	0.239168
mexG	0.910117	6.05921	14.3432	0.00178041	0.00722595
cyaY	-0.909903	6.13289	28.9751	7.52976e-05	0.000642727
ftsX	-0.909447	6.73043	64.0138	8.41941e-07	2.66824e-05
PA14_07680	0.909085	12.2802	23.2277	0.000223185	0.00145485
PA14_02070	0.908327	3.10402	6.93592	0.0187597	0.0478792
PA14_37350	0.907889	3.78366	12.4177	0.00305654	0.0111693
lldP	0.907878	8.41801	15.1857	0.00142266	0.00609801
waaA	-0.907746	4.63535	30.9788	5.33648e-05	0.000492942
amiE	0.907542	8.36426	46.815	5.48822e-06	9.21093e-05
PA14_32190	0.907485	5.76778	17.3577	0.000822303	0.00396963
PA14_38500	0.907337	5.82374	29.7405	6.58943e-05	0.000581627
PA14_02420	0.906172	1.80812	4.62845	0.0943238	0.177393
infB	-0.905434	11.6183	27.9657	9.01183e-05	0.000734435
PA14_26190	0.905339	5.62637	24.6471	0.000168091	0.00119082
PA14_48460	0.904241	2.63526	5.02298	0.0405165	0.0899729
PA14_43910	-0.9032	6.78299	24.4197	0.000175775	0.00122918
PA14_51120	0.90318	1.6755	5.01489	0.0540975	0.113411
cysK	0.902743	7.39371	62.2704	9.98017e-07	2.97309e-05
PA14_29250	0.902681	1.81646	1.80545	0.198968	0.316627
rpsK	-0.902609	9.11552	21.2976	0.000334236	0.00197558
PA14_12910	-0.902437	2.54482	5.52253	0.0328307	0.07564
PA14_23650	0.902425	4.6296	17.355	0.000822843	0.00396963
plsX	-0.90202	7.1703	48.5569	4.43681e-06	7.99137e-05
PA14_39260	0.901261	1.21263	4.51822	0.0712419	0.141817
qor	0.901028	5.81414	17.6153	0.000772601	0.00378549
PA14_32520	0.900559	5.01002	34.5786	2.98431e-05	0.00031838
PA14_71160	0.898264	2.25661	6.91491	0.0189099	0.0480858
trmB	-0.898117	5.68818	23.8295	0.000197647	0.00133529
PA14_10540	-0.897924	7.22187	44.4025	7.44462e-06	0.000112863
PA14_15580	-0.897838	9.04357	40.5227	1.24968e-05	0.000165434
PA14_14900	-0.897656	7.1278	46.7331	5.5442e-06	9.24011e-05
PA14_39830	-0.897209	2.67277	5.23064	0.0370917	0.083706
PA14_57930	-0.896307	8.2151	42.3457	9.75346e-06	0.000136795
PA14_49610	0.895501	3.78837	13.2986	0.00237497	0.00915269
PA14_36550	0.895426	4.84763	8.41067	0.0109642	0.0310775
PA14_26700	0.895333	10.0841	10.1006	0.00621669	0.0196494
kdsA	-0.894867	8.34138	37.0507	2.05227e-05	0.000239597
PA14_72900	-0.894617	7.45648	28.8867	7.64796e-05	0.000650735
PA14_47840	0.89444	3.48646	7.32551	0.0162091	0.0425811
PA14_21000	0.89407	5.73668	22.1182	0.000280743	0.00171908
PA14_13380	-0.893721	5.65008	26.6881	0.000113858	0.000878713
PA14_31110	0.893509	2.60123	7.56399	0.0148453	0.0398956
PA14_28350	0.89298	6.56822	15.6834	0.00125012	0.00549277
PA14_26690	0.892592	7.6685	6.47498	0.0223968	0.0551634
PA14_62190	-0.892036	6.20537	42.858	9.1104e-06	0.000130795
PA14_67710	-0.891724	4.62014	38.0203	1.78081e-05	0.000214778
cobH	0.890946	2.3219	5.10411	0.0423579	0.0932281
ampC	-0.890552	6.09515	14.8681	0.00154694	0.00649519
argF	-0.890089	6.29863	35.7802	2.4819e-05	0.000274854
PA14_37610	0.889988	4.58178	21.3066	0.000333587	0.00197369
PA14_53770	0.889878	4.15302	20.0229	0.00044196	0.00245405
PA14_34750	-0.889383	2.81382	9.1511	0.00850169	0.025163
arnT	0.889141	2.67859	6.09134	0.0260549	0.0624187
PA14_40650	-0.889124	3.80194	6.51998	0.022008	0.0543405
wspD	-0.888031	4.5407	29.3207	7.08759e-05	0.000615133
PA14_47820	-0.887412	6.14425	44.9646	6.92642e-06	0.000106086
PA14_19740	0.887283	5.86757	35.0423	2.7779e-05	0.000300376
rpsD	-0.886573	9.83384	18.1752	0.000675875	0.00340107
PA14_08050	0.885607	7.64285	29.8862	6.42592e-05	0.000569727
PA14_27720	0.884979	4.8336	29.4448	6.93594e-05	0.000605041
sseA	0.884943	5.99635	49.274	4.07186e-06	7.4877e-05
PA14_47870	0.884648	1.72569	5.63273	0.0437104	0.0956044
PA14_69340	-0.884301	7.05565	43.2404	8.6618e-06	0.000126178
PA14_56730	0.884123	5.61599	44.5459	7.30841e-06	0.00011108
nosY	-0.883503	3.93513	8.34263	0.0112289	0.0317221
PA14_20460	0.883443	4.14471	4.57135	0.0493233	0.105216
PA14_13580	0.883369	6.21706	7.86034	0.0133305	0.0366343
PA14_25040	0.883261	6.97126	19.0531	0.000550659	0.00289826
PA14_46000	-0.883164	2.0196	2.48799	0.135506	0.236411
rplX	-0.883139	8.72839	20.7427	0.000376972	0.00216586
PA14_02770	0.883019	2.55997	6.58479	0.0214616	0.0531469
PA14_12030	-0.882772	6.56354	36.939	2.08646e-05	0.000241851
PA14_36890	0.882589	1.47937	1.77632	0.202433	0.321117
cobN_1	0.882574	5.71534	33.9286	3.30363e-05	0.000342313
PA14_05130	-0.882451	5.30973	31.2575	5.09325e-05	0.000477208
PA14_21180	0.882153	4.96678	45.0728	6.83139e-06	0.000105718
PA14_46910	0.881754	9.43561	46.4227	5.76236e-06	9.43191e-05
nirD	0.880631	0.918218	1.45588	0.291127	0.424753
PA14_54240	0.880507	6.48265	17.3634	0.000821164	0.00396963
rpsU	-0.880412	9.34717	29.2336	7.19621e-05	0.000623183
PA14_12820	-0.880076	4.55078	22.8878	0.000239257	0.00153775
PA14_17690	0.879387	6.84835	63.9484	8.47271e-07	2.67092e-05
PA14_67820	-0.879281	4.28293	12.7277	0.00279405	0.0104632
PA14_01430	0.878831	3.47591	11.5572	0.00394602	0.0137407
aspC	0.878703	4.44111	17.1877	0.0008571	0.00410169
PA14_32420	0.878584	7.04135	54.5415	2.23022e-06	5.07161e-05
PA14_38610	0.877604	5.5881	13.889	0.00201519	0.00800969
rbsB	0.877477	9.38501	46.9513	5.39644e-06	9.13409e-05
PA14_53150	-0.876589	7.21344	42.3246	9.78094e-06	0.000136795
PA14_10600	0.875874	4.25414	12.5789	0.0029167	0.010807
PA14_22440	-0.875221	6.77293	33.9536	3.29066e-05	0.00034216
PA14_46860	0.875207	3.16425	8.31085	0.0113551	0.0320026
PA14_16380	-0.875201	4.95544	32.3383	4.26194e-05	0.000414236
accB	0.875154	8.1622	15.5846	0.00128238	0.00560326
rimI	-0.874718	4.83803	8.80826	0.00955314	0.0277782
rplO	-0.87443	9.90209	15.2642	0.00139375	0.00599564
norB	-0.873763	9.37833	19.8531	0.000459091	0.00252797
PA14_46250	-0.872643	3.7223	12.6807	0.00283217	0.0105595
PA14_66100	-0.872512	6.64537	45.0449	6.85577e-06	0.00010581
gbuA	0.872097	5.02983	12.9974	0.00258641	0.00985184
PA14_33430	0.871687	3.40516	19.1891	0.000533725	0.00282661
PA14_44760	0.87168	5.73621	57.2954	1.65799e-06	4.20354e-05
PA14_30320	-0.870306	7.05969	22.1394	0.000279497	0.00171488
PA14_73090	0.870173	5.71333	15.02	0.00148604	0.00630873
gltS	0.869992	3.05613	16.9659	0.000905047	0.00427958
PA14_68290	0.868539	7.74124	23.6668	0.000204206	0.00136273
PA14_24810	0.868531	3.71857	16.3521	0.00105448	0.00480318
PA14_25730	-0.868267	6.41824	48.3795	4.53269e-06	8.08807e-05
arsB	-0.868125	3.7103	9.98774	0.00644757	0.0201757
PA14_24710	-0.867601	4.16841	14.6192	0.001653	0.00680708
PA14_00520	-0.867252	3.3969	1.97527	0.1802	0.293824
braD	0.866297	5.88316	54.2546	2.30175e-06	5.16995e-05
PA14_69330	-0.865918	6.27676	37.8394	1.82821e-05	0.000219164
metZ	-0.865848	6.96863	38.4404	1.67603e-05	0.000206317
rbsC	0.865733	6.25835	23.3574	0.00021738	0.00143269
PA14_11830	0.865443	6.4694	50.6002	3.48311e-06	6.91747e-05
soxB	0.865024	2.93484	6.71901	0.0203789	0.0510587
rpmB	-0.864849	9.48545	15.0282	0.00148282	0.00630596
recR	-0.864444	5.09764	13.4219	0.00229413	0.00893944
PA14_72690	0.864095	6.84663	24.2126	0.00018312	0.00126569
PA14_12540	-0.863048	4.34822	14.5256	0.001695	0.00694077
dnaG	-0.862921	7.30662	61.365	1.09185e-06	3.11255e-05
PA14_71700	-0.862774	3.86087	14.6765	0.00162788	0.00674472
PA14_09920	-0.862706	2.37127	4.58017	0.0491311	0.104881
PA14_45340	-0.862425	2.50427	1.90143	0.188073	0.303422
PA14_01470	0.86145	4.32258	12.6997	0.00281667	0.0105149
PA14_46760	0.860568	2.84095	8.40255	0.0109954	0.0311511
PA14_37550	0.859746	1.12527	1.3414	0.26484	0.395666
PA14_62890	-0.859572	6.94277	21.2599	0.000336956	0.00198574
PA14_50300	-0.858247	7.78195	26.7776	0.000111981	0.000868728
PA14_34850	0.858238	4.01431	22.7115	0.000248107	0.00158008
nirQ	-0.858175	7.69741	33.9348	3.30038e-05	0.000342313
PA14_63100	0.857898	6.78049	9.15555	0.00848894	0.0251377
PA14_64270	0.857611	4.7567	21.3875	0.000327842	0.00194356
motC	-0.857582	6.7566	21.2295	0.000339171	0.00199273
braC	0.857443	9.27392	21.6972	0.000306867	0.00185052
acnA	0.857345	9.66633	37.5137	1.91719e-05	0.000227996
PA14_29420	0.856991	6.11182	25.3575	0.000146436	0.0010614
rmf	0.85699	10.1219	12.7012	0.00281541	0.0105149
rplC	-0.855905	10.6922	24.6861	0.000166812	0.00118317
PA14_26350	0.855407	5.29652	15.9063	0.00118064	0.00524945
PA14_53590	-0.854351	8.4278	14.6709	0.0016303	0.00675007
mltD	-0.854234	7.64868	29.3477	7.05429e-05	0.000614466
PA14_30460	-0.854142	3.40871	5.3762	0.0348912	0.0794585
PA14_68120	0.854117	6.45255	10.7015	0.0051353	0.0169783
fusA1	-0.854039	12.0524	9.69109	0.00710293	0.0217916
rplQ	-0.853629	9.83047	34.9932	2.79898e-05	0.000302107
sltB1	-0.853199	7.28335	54.3984	2.26556e-06	5.11532e-05
phnI	0.852635	4.23139	16.6073	0.000989169	0.00458279
PA14_15930	-0.852395	4.65459	40.4917	1.25506e-05	0.000165434
PA14_16470	-0.852315	6.05277	18.3146	0.000653988	0.0033105
rpsA	-0.852008	12.0302	24.8174	0.000162584	0.00115732
PA14_29150	0.851964	5.49635	38.1592	1.74537e-05	0.000211361
PA14_17150	-0.851763	9.94533	54.5655	2.22435e-06	5.07161e-05
PA14_46820	0.851246	5.46493	25.1327	0.000152925	0.00109703
PA14_31700	0.850908	5.94635	28.3937	8.34641e-05	0.000701023
phnC	0.85082	5.53971	9.2411	0.00824804	0.0245586
hpd	0.850636	9.93394	43.648	8.21084e-06	0.000122115
PA14_49080	0.850528	4.87535	14.3227	0.00179028	0.00725119
rplE	-0.850014	10.2099	21.2717	0.000336105	0.00198269
ggt	0.849122	6.92789	33.5771	3.49234e-05	0.000356902
PA14_30350	-0.849115	6.05122	48.5545	4.43807e-06	7.99137e-05
PA14_08590	-0.848985	0.649867	0.918119	0.353113	0.492429
recG	-0.848139	6.39295	77.2351	2.59309e-07	1.19765e-05
rpmA	-0.847857	10.3401	21.2052	0.000340952	0.00199743
PA14_35780	-0.847459	9.57245	23.5364	0.000209646	0.00139405
PA14_26830	0.847402	4.05581	14.4024	0.00175216	0.00712837
PA14_15350	-0.847375	6.64054	36.011	2.39681e-05	0.00026692
PA14_73100	0.846556	3.22274	7.09035	0.017697	0.045684
PA14_34770	0.846363	2.63006	7.54137	0.0149689	0.0401035
PA14_35080	-0.84625	4.43068	19.8191	0.000462612	0.00254501
trpA	0.845452	5.20678	21.1353	0.000346138	0.00202185
PA14_45470	-0.844604	4.524	18.6271	0.000607793	0.0031137
PA14_36060	0.844521	2.13352	5.6134	0.0316221	0.0733091
PA14_01780	0.844293	6.23252	38.8484	1.5809e-05	0.000196438
PA14_57920	-0.842868	8.03559	40.8775	1.19006e-05	0.000160416
PA14_35890	0.842773	4.65453	28.4697	8.23422e-05	0.000696097
sndH	0.84222	7.01345	20.2992	0.000415612	0.00234047
PA14_34960	0.842212	6.53834	41.8196	1.04679e-05	0.000144037
PA14_26260	0.841933	1.6578	4.40021	0.0608396	0.125167
thiL	-0.841881	5.13111	17.5375	0.000787234	0.00384139
PA14_12170	-0.841254	2.43236	6.37802	0.023262	0.0568711
PA14_15260	0.840792	1.31354	2.0251	0.343506	0.482507
PA14_49320	-0.840562	6.84819	36.8488	2.11452e-05	0.000244154
PA14_58560	-0.84038	5.23631	27.9739	8.99857e-05	0.000734431
PA14_26850	0.839542	2.62665	6.33541	0.0236543	0.0575705
PA14_14290	0.839457	4.38818	10.0017	0.00641858	0.0201273
PA14_36880	0.838931	2.81937	7.36147	0.0159945	0.0421931
PA14_57890	-0.838358	7.92441	25.4925	0.000142688	0.00104568
coIII	0.837972	8.10697	56.5001	1.80405e-06	4.44257e-05
PA14_57970	-0.837525	8.27426	14.9921	0.00149699	0.00633164
ptxR	-0.836951	3.97955	14.9549	0.00151181	0.00637959
phnH	0.836515	3.27918	4.28579	0.0560496	0.117132
soxA	0.836071	4.22087	23.313	0.000219351	0.00144408
PA14_13950	-0.83553	6.49068	11.3045	0.00426088	0.0145898
cspD	0.835493	9.7707	22.7092	0.000248229	0.00158008
PA14_07300	-0.8354	5.59662	45.0195	6.87797e-06	0.00010581
narJ	-0.834378	2.86527	1.8823	0.190183	0.306164
PA14_38010	-0.834057	4.8783	36.6973	2.16266e-05	0.000247791
PA14_40880	0.833938	6.21476	33.2621	3.67188e-05	0.000371427
PA14_33770	-0.833902	5.22035	13.2996	0.0023743	0.00915269
PA14_58210	-0.833571	3.61794	16.3038	0.00106738	0.00483608
ileS	-0.833556	8.73372	25.5467	0.000141214	0.00104079
PA14_33560	-0.833373	4.35449	14.8431	0.00155724	0.00651088
PA14_61370	0.833147	4.25944	24.1749	0.000184493	0.00127076
PA14_37670	0.832757	5.59191	22.8084	0.000243198	0.00155972
PA14_35330	0.832371	3.82557	21.4119	0.000326131	0.00193806
PA14_48140	0.831866	8.11673	13.3021	0.0023726	0.00915269
PA14_71080	0.831596	3.26338	10.1852	0.00604974	0.0192545
PA14_18890	-0.831125	3.59909	10.9544	0.00474581	0.0159424
PA14_34790	0.829597	2.54696	6.78144	0.0198969	0.0501039
PA14_66160	-0.829341	7.00438	29.0659	7.41064e-05	0.000635289
mltB1	-0.829185	6.65547	21.8322	0.000298199	0.00180739
PA14_29800	0.829082	8.4309	12.0072	0.00344864	0.0123036
PA14_35760	-0.828284	8.30902	9.86624	0.00670725	0.020846
phoU	-0.827488	7.35535	17.0776	0.000880548	0.00417639
PA14_67940	0.827413	1.62611	1.42767	0.250639	0.378531
PA14_01810	0.825602	4.41413	19.3214	0.000517814	0.00276198
PA14_31220	0.825478	3.18347	8.8947	0.00927465	0.0270344
PA14_15120	0.824925	5.94705	53.9513	2.38021e-06	5.27186e-05
PA14_21160	0.824636	4.45092	20.3285	0.00041293	0.00232977
PA14_12110	-0.824381	6.05279	19.8821	0.000456114	0.00251623
PA14_54840	0.823977	3.72205	4.20034	0.0582681	0.120962
PA14_62650	-0.82386	9.30639	39.361	1.46994e-05	0.000186699
PA14_25500	-0.823263	5.35209	24.4527	0.000174635	0.00122553
PA14_35990	-0.822702	2.04397	4.41544	0.0528704	0.111466
PA14_16660	0.822536	8.18507	12.2339	0.00322554	0.0116968
PA14_65420	-0.822532	7.08912	50.1498	3.67151e-06	7.07923e-05
PA14_39560	0.82249	8.99054	14.6469	0.00164081	0.00677474
PA14_29190	-0.822296	3.45539	1.61835	0.222632	0.345158
PA14_39000	0.821486	2.41477	6.90661	0.0189696	0.0481759
PA14_36540	0.821293	2.89205	4.80361	0.0445421	0.0970318
PA14_46030	0.820665	7.86543	21.4301	0.000324864	0.00193554
PA14_09990	-0.820375	2.11218	2.32384	0.209474	0.328952
PA14_22160	-0.819502	3.47868	4.75956	0.0454058	0.0983738
PA14_55740	0.818205	5.21588	8.67537	0.0100002	0.0287139
tal	0.817842	9.1634	60.346	1.20962e-06	3.33654e-05
PA14_00310	0.817587	6.95761	37.2848	1.98268e-05	0.000234433
PA14_61150	0.817127	7.73641	19.6875	0.000476532	0.0025976
PA14_05910	-0.815959	4.87922	10.7642	0.00503548	0.0167232
PA14_18920	-0.815481	5.30927	17.6416	0.000767711	0.00376773
PA14_69110	0.815386	5.83956	25.2235	0.000150265	0.00108256
PA14_34370	0.815321	3.15983	15.0879	0.00145967	0.00622529
PA14_48210	0.815135	2.11637	4.59044	0.0489085	0.104668
truB	-0.814988	8.57966	45.9972	6.07734e-06	9.81269e-05
PA14_06790	-0.814978	4.22624	11.2871	0.00428363	0.0146509
PA14_71120	0.814633	0.84279	0.855065	0.369716	0.508958
benD	0.814515	2.00951	3.88014	0.096037	0.179933
pcnB	-0.813561	7.95817	16.3167	0.0010639	0.00483207
lpxB	-0.813334	6.80957	26.3815	0.000120564	0.000921015
nirJ	-0.813228	6.30127	26.8963	0.000109546	0.000853172
PA14_11520	-0.813226	4.76703	8.2787	0.0114844	0.0323364
rhlC	0.812832	5.5775	31.131	5.2021e-05	0.000483527
rbfA	-0.812238	6.72283	45.0052	6.89062e-06	0.00010581
PA14_03720	-0.811702	5.84842	17.917	0.000718658	0.00355628
PA14_09810	0.81096	3.47467	18.0977	0.000688408	0.00344667
PA14_65190	-0.810518	6.71044	10.9822	0.0047051	0.0158468
PA14_65580	-0.81044	4.45036	10.0888	0.00624031	0.0196955
PA14_25130	-0.810039	7.35289	46.5539	5.66898e-06	9.33033e-05
PA14_46930	0.808948	6.06455	35.3407	2.65364e-05	0.000290099
PA14_28910	-0.808774	3.22689	12.4221	0.00305267	0.0111693
fabG_1	0.808538	2.38029	3.45219	0.0888981	0.169432
nosZ	-0.808327	8.1712	18.9789	0.000560157	0.00292756
waaC	-0.808255	7.04788	17.4756	0.000799111	0.00388662
PA14_29130	0.8079	7.87077	39.9548	1.35229e-05	0.000176172
PA14_60770	-0.8075	4.31029	16.3907	0.00104428	0.00476769
PA14_40060	-0.807263	3.17099	13.7569	0.00208996	0.00825728
PA14_18080	-0.807224	6.43333	43.5343	8.33395e-06	0.000123165
PA14_55770	-0.806639	7.2983	51.6569	3.08259e-06	6.34503e-05
PA14_34140	-0.806634	3.70597	8.99932	0.00894993	0.0262808
PA14_38660	-0.806529	7.41291	13.1849	0.00245237	0.00941444
rbsR	0.805877	6.67908	29.7153	6.61812e-05	0.000583295
PA14_25600	-0.80587	6.93916	20.6623	0.000383665	0.00219796
PA14_34330	0.805691	6.09732	14.6949	0.00161987	0.0067209
PA14_53330	-0.805133	6.16376	19.9765	0.000446573	0.00247505
argB	-0.804844	7.83647	24.225	0.000182671	0.00126406
PA14_49650	0.804199	6.87336	24.1556	0.000185202	0.00127417
PA14_64170	-0.80363	6.53618	33.2252	3.69363e-05	0.000372994
PA14_58375	-0.803462	7.79392	28.3026	8.48318e-05	0.000708216
pilS	-0.803136	5.42996	38.6036	1.63722e-05	0.000202377
PA14_03110	0.802903	1.10647	1.03497	0.568993	0.703126
PA14_01030	-0.802856	5.897	25.5547	0.000140999	0.00104079
PA14_58090	-0.801547	7.7476	50.627	3.47222e-06	6.91747e-05
PA14_71140	-0.801276	0.54752	0.784165	0.389803	0.530118
PA14_40180	0.799838	5.4814	13.2352	0.00241776	0.00929955
PA14_31170	0.798931	1.16448	0.559284	0.466077	0.604821
PA14_36820	-0.798851	11.6631	2.10935	0.166935	0.277355
rplR	-0.798835	9.60428	16.8524	0.000930757	0.00437144
PA14_26280	0.798231	7.77118	10.9513	0.0047503	0.0159449
PA14_36200	-0.797793	7.1955	5.46747	0.0335889	0.0770296
tolR	-0.797653	7.26866	32.8954	3.89428e-05	0.000389074
PA14_61120	0.797561	6.73971	26.5351	0.000117151	0.00089831
PA14_29040	0.797152	1.84198	1.59777	0.225451	0.347951
PA14_48010	0.79701	3.97085	9.46988	0.00764142	0.0230519
PA14_62020	-0.796969	7.80891	17.9401	0.000714699	0.00354387
PA14_46950	0.796309	7.23746	20.6408	0.000385471	0.00220406
pheA	-0.795431	7.70218	32.8934	3.89551e-05	0.000389074
chiC	0.795285	8.77166	17.4498	0.000804118	0.00390459
merA	0.795169	6.4199	60.2177	1.22544e-06	3.34917e-05
PA14_64620	-0.794585	2.66801	1.78808	0.201025	0.319473
fdxA	-0.794192	7.98507	29.1772	7.26744e-05	0.00062524
pslM	0.794116	2.43377	7.19322	0.0170276	0.0442628
lldD	0.794068	6.50095	11.7957	0.00367288	0.0129485
mdcA	0.793799	6.88036	14.464	0.00172332	0.00704222
PA14_62470	-0.792858	4.61337	18.0456	0.000696974	0.00347569
PA14_28140	0.792824	6.00783	9.56881	0.00739502	0.0224306
PA14_20550	-0.792764	2.72595	4.54798	0.0511485	0.108565
leuA	0.791536	9.06866	7.14417	0.0173431	0.0449286
PA14_68360	0.791301	9.57074	30.5768	5.71099e-05	0.000519482
clpB	-0.790619	9.47084	27.5574	9.70349e-05	0.000773866
PA14_13860	-0.790244	2.23273	2.06203	0.171473	0.28261
PA14_14490	0.789932	3.44116	16.0749	0.00113099	0.00507612
PA14_45210	0.787425	3.07434	11.8519	0.00361181	0.0127862
PA14_16930	-0.786994	5.25301	25.9307	0.000131255	0.000984909
PA14_41710	-0.786542	7.85934	22.693	0.000249059	0.00158197
PA14_21800	0.786313	2.43667	3.5101	0.0805511	0.155921
gltK	-0.786013	7.70293	4.18755	0.0586089	0.1215
PA14_29530	0.785983	1.45538	1.12702	0.305156	0.441191
PA14_01360	0.785732	3.89473	7.55851	0.0148752	0.0399577
cynS	0.784932	2.62139	12.3141	0.010727	0.0304922
PA14_31260	0.783879	1.05059	2.19563	0.240749	0.36685
PA14_72030	-0.783632	4.86049	11.116	0.00451456	0.0153089
PA14_55860	-0.783418	4.84061	16.1691	0.0011043	0.00497309
PA14_50930	0.783347	5.5405	11.3371	0.00421867	0.0144786
PA14_05120	-0.782976	2.80957	10.8526	0.0140073	0.0380729
PA14_67180	-0.782874	5.97751	12.1974	0.00326026	0.011794
nosR	-0.782643	9.00765	9.2071	0.00834284	0.0247913
pnp	-0.782352	10.4787	16.8901	0.000922128	0.00433968
PA14_69040	-0.781805	6.36655	38.6598	1.62408e-05	0.00020117
PA14_28490	0.781647	8.23409	15.6363	0.00126538	0.00554757
PA14_08060	0.78148	5.96944	34.007	3.26312e-05	0.000340195
PA14_32660	0.781237	2.44781	6.01961	0.0268133	0.0640294
PA14_29160	0.781089	7.13199	42.0795	1.01077e-05	0.000140705
PA14_61590	0.780806	6.59136	15.3811	0.00135189	0.0058451
rplF	-0.780665	10.3645	25.0314	0.000155956	0.0011158
tufA	-0.780477	12.2857	8.20881	0.0117713	0.0330188
PA14_59680	0.780252	1.46072	2.68394	0.122101	0.217612
cvpA	-0.780238	5.55902	28.4094	8.32305e-05	0.000700406
PA14_04350	-0.780203	3.78997	7.26699	0.0165654	0.0432654
trmA	-0.779154	6.56352	30.8068	5.49322e-05	0.000502743
PA14_47000	-0.778847	3.22738	7.01835	0.0181836	0.0466091
antC	0.778083	2.43888	1.21965	0.286778	0.420325
PA14_01440	0.778002	3.2882	9.07087	0.00873534	0.0257616
serC	-0.777526	7.79481	18.6785	0.000600554	0.00308457
PA14_04000	-0.777503	5.99682	19.5707	0.000489281	0.0026598
PA14_23000	-0.777197	6.88426	7.25541	0.0166371	0.0434181
PA14_40130	0.776264	3.59808	9.04293	0.00881841	0.0259457
efp	-0.776063	9.91564	25.2821	0.000148575	0.00107168
pgpA	-0.776017	4.56989	10.2172	0.00598794	0.0190884
PA14_10840	0.775833	4.53379	15.1486	0.00143658	0.00614881
PA14_64900	0.775714	7.59327	18.8055	0.000583081	0.0030169
PA14_02990	0.775528	3.03986	12.225	0.00721308	0.02205
PA14_70740	0.775322	7.79393	19.5602	0.000490447	0.0026637
livM	0.775079	5.99839	36.4378	2.248e-05	0.000253666
PA14_35240	0.774864	2.36308	6.66777	0.0360405	0.0817706
PA14_34150	-0.774818	5.25817	7.74787	0.0138835	0.0378571
PA14_29100	0.774222	4.16642	14.9439	0.0015162	0.00638863
PA14_28340	0.774033	6.32352	45.9616	6.10464e-06	9.83012e-05
mntH2	0.77363	4.41866	18.0283	0.000699856	0.00348349
PA14_56570	0.773375	6.81006	25.5272	0.000141741	0.00104156
ubiB	-0.773357	6.18525	26.6543	0.000114577	0.000881978
PA14_47600	-0.772885	5.00579	19.527	0.000494149	0.00267883
PA14_31900	-0.772688	6.2931	27.649	9.54323e-05	0.000763202
PA14_18250	0.772523	4.54376	12.5428	0.00294735	0.01088
PA14_10340	-0.771982	4.88794	10.5481	0.0053894	0.0175657
PA14_09910	0.771932	6.04216	21.9123	0.000293191	0.00177885
PA14_57870	-0.771925	6.38945	55.8026	1.94424e-06	4.65213e-05
PA14_68070	0.771919	8.54616	22.0999	0.000281828	0.00172117
PA14_32780	0.771918	3.99357	7.56407	0.0148449	0.0398956
PA14_34390	0.77183	2.83009	7.67594	0.014251	0.0386293
PA14_54630	0.771769	6.51747	17.183	0.000858082	0.00410309
phnN	0.771692	5.22011	34.0013	3.26606e-05	0.000340195
secB	-0.771501	8.1247	44.8205	7.05525e-06	0.000107783
PA14_12210	-0.771372	6.86337	59.5783	1.30788e-06	3.49433e-05
PA14_64880	0.770822	3.85917	20.0895	0.000435439	0.00242462
PA14_30540	-0.77066	4.3066	6.24756	0.0244877	0.0592638
PA14_50320	-0.769839	5.87785	15.5266	0.00130176	0.00566951
catB	-0.76971	2.79885	2.07582	0.170134	0.280714
PA14_42200	0.76942	9.54908	19.3401	0.000515615	0.00275299
PA14_17280	0.769077	6.97037	28.1207	8.76413e-05	0.00072624
PA14_71720	0.768448	9.43706	29.5797	6.77541e-05	0.000593645
PA14_59510	-0.76775	2.16391	1.40331	0.254545	0.383749
PA14_37760	0.767691	6.03557	22.1348	0.000279769	0.00171488
PA14_35070	-0.767532	5.38903	24.8707	0.000160904	0.0011481
tnpS	-0.766497	8.34419	47.1325	5.27715e-06	9.00896e-05
PA14_23670	0.765885	4.5074	10.8288	0.00493487	0.0164348
PA14_12360	-0.764784	5.29098	19.4999	0.000497201	0.00268569
xdhA	0.76424	6.69301	36.7564	2.14373e-05	0.00024657
PA14_69620	-0.763929	5.89726	13.3992	0.00230876	0.00898994
PA14_27780	-0.761854	5.82126	23.3812	0.000216332	0.00142894
PA14_15130	0.760734	5.95604	34.8091	2.8796e-05	0.000309129
aruE	0.760589	7.12088	39.6957	1.40227e-05	0.00018077
PA14_00690	0.760534	3.39915	9.31569	0.0080444	0.0240003
clpA	0.76035	11.2897	27.739	9.38871e-05	0.000756111
PA14_03510	0.759978	4.42997	11.6197	0.00387225	0.0135472
PA14_52640	0.759506	5.62341	19.2456	0.000526857	0.0028038
PA14_41420	-0.759192	5.56686	10.7595	0.00504284	0.0167383
PA14_56100	-0.758796	4.46952	17.8555	0.0007293	0.00360296
PA14_39690	0.758419	4.78189	22.6366	0.000251984	0.0015894
PA14_45460	-0.758077	4.30161	24.2764	0.000180819	0.00125415
hisP	-0.758022	1.7947	1.03051	0.326085	0.463126
rpsM	-0.758008	9.12551	28.0885	8.81501e-05	0.000727422
PA14_65795	0.757594	3.56561	11.8015	0.00366653	0.0129338
mexH	0.757534	6.25682	20.2781	0.000417567	0.00234483
PA14_29120	0.757051	5.65835	14.0184	0.00194486	0.00778729
PA14_44680	-0.757012	8.7133	20.3696	0.000409193	0.00231307
PA14_28470	0.756418	5.15528	14.9153	0.0015277	0.00642799
PA14_59020	-0.756403	2.59074	7.57096	0.0217035	0.0536109
PA14_18090	0.755754	6.17648	23.6849	0.000203466	0.00136119
PA14_63700	0.754663	1.79715	1.14401	0.301665	0.437198
PA14_72520	0.754272	6.7286	40.6323	1.2309e-05	0.000164319
PA14_44860	0.753977	5.52429	17.2438	0.000845445	0.00405895
PA14_69140	-0.753929	5.6402	14.6012	0.00166098	0.00683432
PA14_07370	0.753658	6.38827	10.3539	0.00573196	0.0184301
PA14_71380	0.753436	3.6177	7.31022	0.0163014	0.0427105
cyoB	0.752915	6.78663	25.431	0.000144381	0.0010522
pdxA_1	-0.752644	6.12332	17.2106	0.000852323	0.00408539
rpsJ	-0.752562	10.1815	23.2394	0.000222656	0.001453
PA14_60650	-0.752148	4.74237	18.8887	0.00057195	0.00297874
PA14_72420	-0.751872	7.47106	17.6959	0.00075775	0.00372498
PA14_55220	0.751732	4.19602	11.8054	0.00366232	0.0129266
PA14_72110	-0.751082	6.36942	19.4013	0.000508463	0.00272577
rplU	-0.750691	9.52911	37.3965	1.95042e-05	0.000231486
PA14_15600	-0.750266	7.13049	21.1081	0.000348176	0.00202978
gcvP1	0.750244	7.81629	40.6363	1.23022e-05	0.000164319
PA14_01560	-0.750177	6.36029	30.4888	5.79684e-05	0.000525686
PA14_14860	-0.749986	7.47061	63.7422	8.64329e-07	2.71035e-05
PA14_22550	-0.749496	4.259	11.8639	0.00359885	0.0127479
PA14_43780	-0.748887	3.42011	5.9969	0.0270586	0.0643574
PA14_02380	0.748755	3.41109	8.74673	0.00975724	0.028273
PA14_62660	-0.747729	6.11026	13.0762	0.00252908	0.00965783
PA14_36500	0.74761	7.78688	8.74468	0.00976413	0.028273
PA14_62690	0.747297	11.4516	9.91827	0.00659461	0.0205495
PA14_15270	0.747287	1.66642	1.09083	0.312777	0.448826
acsB	0.746462	7.86201	62.0609	1.01889e-06	3.00599e-05
phzH	0.745943	7.36475	10.1974	0.00602594	0.019189
trmD	-0.745321	8.92684	18.5405	0.000620208	0.00316913
PA14_65540	-0.744766	8.28168	30.4772	5.80824e-05	0.00052592
PA14_50870	0.744611	4.57911	12.4349	0.00304127	0.0111507
PA14_51250	-0.744502	6.43631	69.9001	4.87096e-07	1.81472e-05
PA14_23590	0.743979	3.46517	6.3855	0.0231939	0.0567513
fliI	-0.743925	6.87046	8.69634	0.00992811	0.0285619
PA14_15200	0.742864	4.92069	31.6635	4.76112e-05	0.000453143
wzz	-0.74281	10.0755	12.1271	0.00332856	0.0120119
PA14_01250	0.742493	6.60527	5.7985	0.0293166	0.068957
PA14_72540	0.742393	8.86066	32.7359	3.99568e-05	0.000394143
cysI	-0.742374	8.12775	14.8316	0.00156198	0.00652613
wspC	-0.742278	5.65074	52.7479	2.7229e-06	5.8198e-05
PA14_14390	0.74169	7.71047	12.8796	0.00267481	0.0101245
PA14_33520	-0.740035	5.69337	11.6755	0.00380775	0.0133686
PA14_36410	0.739512	5.21386	15.0214	0.00148549	0.00630873
PA14_66150	-0.738779	6.29898	10.9883	0.00469611	0.0158254
oprD	0.738553	11.1116	11.952	0.00350562	0.0124845
secA	-0.738464	10.1432	28.3	8.48718e-05	0.000708216
dxs	-0.738004	7.12738	16.4687	0.00102403	0.00471135
PA14_61910	0.737673	3.51044	9.77679	0.00690608	0.0213415
tolA	-0.736687	9.37608	32.2706	4.30923e-05	0.000416792
pcaK	0.736257	2.57584	3.66333	0.074838	0.147791
PA14_36150	0.735959	1.69593	2.98867	0.104306	0.192431
nirG	-0.735947	4.34015	10.4732	0.00551871	0.0178504
PA14_70010	0.735851	6.81972	13.8231	0.00205209	0.00813463
PA14_40430	0.735071	6.98736	13.8345	0.00204565	0.0081145
PA14_64310	0.734836	2.10106	1.26052	0.279148	0.411674
PA14_38020	0.734284	3.14679	10.3322	0.00577167	0.0185478
PA14_22770	-0.733906	4.49092	6.75945	0.0200652	0.0504423
PA14_22980	-0.733852	10.2879	7.6369	0.014455	0.0390581
lecB	0.733501	10.0845	41.2296	1.13406e-05	0.000154616
oprL	-0.732927	10.5059	23.9262	0.000193861	0.00131852
cobA	-0.732826	6.94844	4.69396	0.0467285	0.100763
PA14_10330	-0.731402	3.72076	6.63717	0.0210314	0.0523421
PA14_35040	0.73137	2.51165	3.89361	0.0671288	0.135074
hflK	-0.731145	9.17263	15.3283	0.00137059	0.00590456
PA14_72550	0.731094	4.44913	6.47661	0.0223827	0.0551513
PA14_09780	0.731054	4.61827	24.9953	0.000157054	0.00112197
cyoA	0.730787	6.08261	11.6581	0.00382778	0.0134231
PA14_54870	-0.730735	7.33408	16.9093	0.000917774	0.00432603
holA	-0.73036	5.46229	9.60472	0.00730784	0.0222484
PA14_15770	-0.729755	6.30542	28.6598	7.9608e-05	0.000675647
PA14_52540	-0.728742	0.901104	0.860238	0.368311	0.507542
PA14_38090	-0.728648	4.09478	10.6149	0.00527695	0.0172614
PA14_53780	0.728393	4.71146	23.1455	0.000226957	0.00147139
PA14_30940	0.728371	1.12197	1.72493	0.459416	0.598556
PA14_18100	0.728133	5.34296	11.0711	0.00457747	0.015487
ptpA	-0.727918	4.67456	16.6483	0.000979132	0.00454863
PA14_14160	-0.72773	5.68294	32.4202	4.20547e-05	0.000411432
icd	0.727644	11.3945	23.5052	0.00021097	0.00139973
aroP1	-0.727084	7.3938	52.8075	2.70468e-06	5.8175e-05
PA14_48660	0.726807	4.02404	11.5686	0.00393239	0.0137013
PA14_37130	0.726791	3.90539	8.21547	0.0117436	0.0329728
PA14_33150	0.726484	5.53784	6.51544	0.0220469	0.054414
dbpA	-0.726457	6.36732	26.3316	0.000121697	0.000927199
PA14_38170	-0.725609	3.67691	7.03835	0.0180469	0.0463662
PA14_01270	0.725584	6.34197	12.479	0.00300251	0.0110358
PA14_62680	0.725314	11.4012	10.0877	0.0062426	0.0196955
PA14_28620	0.725192	6.34858	14.8511	0.00155391	0.00650611
PA14_14360	-0.724803	6.30169	8.46148	0.0107712	0.0306031
PA14_05070	-0.724762	4.35672	14.3399	0.00178196	0.00722732
PA14_00180	-0.723556	5.54198	16.6984	0.000967005	0.00451168
PA14_42950	0.72285	3.52642	2.423	0.140346	0.242511
PA14_15290	0.722669	4.07329	12.6046	0.00289511	0.0107404
PA14_13610	0.722504	5.00695	8.11622	0.0121641	0.0339615
alc	0.72216	6.04509	39.9445	1.35426e-05	0.000176172
PA14_68500	0.722056	5.57174	18.5947	0.000612401	0.00313192
PA14_66340	0.721884	6.63302	31.2992	5.05797e-05	0.000476073
PA14_49690	-0.721648	5.99316	7.07548	0.0177963	0.0459005
PA14_20920	0.721085	5.27423	10.5759	0.00534229	0.0174408
PA14_47080	0.720891	4.61952	14.2146	0.00184356	0.00742657
PA14_25590	-0.720363	5.47304	15.5834	0.00128279	0.00560326
pcaB	0.720264	4.25831	19.0137	0.000555683	0.00291756
PA14_45450	-0.719758	2.42206	3.52593	0.0799377	0.154934
PA14_37840	0.719754	3.24032	9.16007	0.008476	0.0251119
PA14_31300	-0.71945	6.351	22.1733	0.00027752	0.00170812
bfrB	-0.718877	11.7381	23.0672	0.000230617	0.00149187
PA14_39570	0.718795	3.15751	3.92727	0.0660826	0.13351
PA14_15140	0.718392	4.77802	18.9259	0.000567056	0.00295584
PA14_41290	-0.718228	2.45605	1.2886	0.274065	0.405849
PA14_56540	-0.717848	8.0528	14.2532	0.00182432	0.00736902
PA14_66110	-0.717791	7.6966	25.4294	0.000144426	0.0010522
PA14_12530	-0.71735	5.1578	23.3063	0.000219646	0.00144443
PA14_37220	0.7173	5.08469	17.719	0.000753545	0.00371043
PA14_51110	0.71697	1.14124	0.909101	0.35542	0.494534
ada	0.716853	5.35789	10.1366	0.00614501	0.0194848
PA14_40830	0.716769	7.64555	61.5886	1.06778e-06	3.07335e-05
rpsR	-0.71662	8.59662	10.8952	0.00483388	0.0161436
PA14_53810	0.716585	5.78979	27.9587	9.02327e-05	0.000734435
PA14_53700	0.715763	2.65397	4.8488	0.10525	0.193356
PA14_07110	0.7151	8.70303	16.2875	0.00107175	0.00485221
PA14_46780	0.714677	5.08495	4.63846	0.0478828	0.10288
fruK	0.714134	2.78446	7.71503	0.0214367	0.0531469
PA14_21870	-0.713999	6.39666	18.8037	0.000583328	0.0030169
mexI	0.713883	7.13491	22.4226	0.000263431	0.00164004
PA14_13110	-0.713608	8.83047	16.2769	0.00107463	0.00486153
PA14_16990	0.713077	5.78004	12.9851	0.00259545	0.00986833
PA14_00700	0.712651	2.54991	3.70285	0.0734431	0.145422
metX	-0.7124	5.31775	14.9802	0.00150171	0.00634551
PA14_46270	-0.712292	3.48996	4.63031	0.0480549	0.103212
feoB	0.712121	5.88261	13.9358	0.00198943	0.00791784
ftsK	-0.712034	8.63161	31.7238	4.71391e-05	0.000450087
PA14_08540	-0.711921	8.96112	40.5888	1.23832e-05	0.000164319
PA14_64290	0.711339	2.22935	4.9593	0.0441201	0.0962884
codA	-0.710361	5.81494	19.786	0.000466064	0.00255818
PA14_38970	0.710191	2.96381	7.51405	0.0297709	0.0697778
PA14_60960	0.709982	10.224	10.2524	0.00592071	0.0189552
PA14_61550	0.709157	4.23398	8.04339	0.0124837	0.0347237
PA14_61850	-0.708388	6.56418	39.3959	1.46271e-05	0.000186214
PA14_56560	0.708015	5.7494	5.76138	0.0297629	0.0697778
PA14_54730	0.707904	3.50923	5.43124	0.034099	0.0778697
mreC	-0.707726	6.52543	29.825	6.49403e-05	0.000574057
qacH	0.707386	1.80721	1.31649	0.269141	0.400384
PA14_68720	-0.707152	3.43366	7.8988	0.0131472	0.0362309
moaB1	0.706659	4.39074	1.85176	0.193614	0.310178
PA14_49870	0.706572	6.04516	26.0325	0.00012875	0.000971004
PA14_18690	0.706523	9.06463	15.895	0.00118405	0.00525676
PA14_55820	-0.706442	7.57411	33.5885	3.48605e-05	0.00035687
tolB	-0.706033	8.81551	31.8828	4.59194e-05	0.000439851
PA14_47450	-0.705802	3.63267	12.4171	0.00305713	0.0111693
PA14_72790	-0.705752	4.40868	9.18735	0.00839846	0.0249319
PA14_52240	-0.705703	5.28358	20.75	0.000376371	0.00216586
PA14_37400	0.70557	2.98086	6.12411	0.0337554	0.0772923
rpsP	-0.705371	7.20869	21.4864	0.000320972	0.0019181
PA14_42670	-0.705236	7.75941	18.0894	0.000689758	0.0034479
PA14_09850	0.705209	4.64509	24.1194	0.00018654	0.00128131
PA14_68110	0.704067	6.0919	15.0387	0.00147872	0.00629538
xylY	0.703761	0.751506	0.514157	0.484328	0.622573
PA14_59610	-0.703243	7.95636	16.3161	0.00106406	0.00483207
glpQ	0.70272	4.71417	13.0629	0.00253863	0.00968321
PA14_52500	0.70258	1.06946	1.33704	0.265587	0.396483
PA14_49790	0.702223	3.72308	14.0535	0.0019263	0.00772855
rnr	-0.701855	9.4278	11.4741	0.00404655	0.0139846
PA14_02630	0.701672	3.50287	7.09842	0.0176434	0.0456049
PA14_67410	0.701671	4.40952	14.2432	0.00182927	0.00737902
carB	-0.701567	10.4301	17.0044	0.000896511	0.00424258
PA14_36080	0.700913	2.16639	2.59479	0.12799	0.225411
PA14_58270	-0.700536	5.83931	22.3823	0.00026565	0.00164869
PA14_30380	-0.700462	4.31356	5.65067	0.0311415	0.0724487
mexA	0.700399	8.59055	20.7457	0.00037672	0.00216586
PA14_51920	-0.700057	4.2806	8.67108	0.0100151	0.0287289
PA14_04660	-0.69959	5.05243	9.52762	0.00749649	0.0226721
PA14_48340	0.699382	3.01563	7.4102	0.0157089	0.0416047
purF	-0.69937	7.70579	28.2529	8.55897e-05	0.000713208
PA14_64890	0.699132	4.46712	19.5122	0.000495806	0.00268303
PA14_29300	-0.698845	4.78242	25.3897	0.000145532	0.00105612
PA14_34260	0.698817	2.56754	5.35259	0.0711629	0.141707
rnc	-0.698681	7.82711	39.683	1.40477e-05	0.00018077
fhp	0.698664	4.95416	11.398	0.0041412	0.0142538
popB	0.698537	4.50372	18.1457	0.000680612	0.00341897
PA14_61610	0.698135	5.9962	3.019	0.102712	0.190168
PA14_02050	0.697872	4.72965	10.2739	0.0058802	0.0188458
rpsN	-0.697788	9.07565	22.1478	0.000279008	0.00171374
PA14_51630	0.697452	5.01162	5.73254	0.030115	0.0704458
PA14_62880	-0.697334	7.52705	12.225	0.00323389	0.0117199
PA14_53730	0.696255	6.2822	32.8781	3.90511e-05	0.000389074
PA14_40250	-0.695454	7.33364	39.328	1.47681e-05	0.000186699
PA14_72740	-0.694766	5.04358	10.4918	0.00548613	0.017774
PA14_05860	0.694544	6.96004	22.412	0.000264014	0.00164025
PA14_16740	0.694205	4.80456	9.99979	0.00642246	0.0201289
metN	-0.693884	5.71773	10.4964	0.00547818	0.0177676
cobM	0.693815	3.55332	14.5869	0.00166737	0.00685117
tolQ	-0.693431	7.653	25.564	0.000140747	0.00104041
PA14_25800	-0.692505	7.88926	15.1375	0.00144077	0.00615791
PA14_66800	-0.692505	4.93907	14.3805	0.00176254	0.00716319
PA14_03730	-0.692217	9.31343	45.7211	6.29222e-06	0.000100507
PA14_36650	0.691718	7.3173	9.90187	0.00662989	0.0206379
PA14_07480	-0.691312	8.98021	17.5223	0.000790129	0.00384921
PA14_56220	0.691067	6.86864	13.943	0.00198553	0.00791288
PA14_48850	-0.690967	4.33622	14.4337	0.00173743	0.00709501
PA14_72890	-0.690901	7.17477	35.0669	2.76742e-05	0.000299788
PA14_24400	-0.690713	4.25727	3.11321	0.0979439	0.182874
PA14_16200	-0.690533	3.40211	5.11586	0.0389411	0.0871567
PA14_72180	0.690088	3.89549	10.0592	0.00630015	0.0198185
PA14_14990	0.689092	8.16763	19.7578	0.000469032	0.00256847
PA14_69890	-0.689013	5.03899	14.3767	0.00176435	0.00716563
PA14_40750	0.688708	5.89841	10.2376	0.00594889	0.0190147
PA14_12770	-0.688378	5.35814	19.7458	0.000470307	0.00257072
PA14_12760	-0.687563	5.54467	12.7105	0.00280792	0.0105019
pscH	-0.687503	1.58776	0.732598	0.405467	0.545877
PA14_59390	0.687487	6.62484	11.0523	0.00460414	0.015557
PA14_40560	0.687405	10.1575	8.74221	0.00977243	0.028273
PA14_14975	0.68719	5.35708	7.52684	0.0150488	0.0402247
PA14_27980	-0.68707	5.13155	21.7999	0.000300246	0.00181796
PA14_24440	-0.686735	5.21533	24.8442	0.000161737	0.00115267
PA14_44960	0.686707	2.947	4.50005	0.0509098	0.108174
fabG_4	0.686586	6.33647	21.2115	0.000340494	0.00199672
ssuB	-0.686183	2.44382	3.5744	0.0780928	0.152101
cysG	-0.686134	6.31856	14.2462	0.00182781	0.0073781
PA14_71800	0.686044	5.98148	29.1263	7.33258e-05	0.000629503
PA14_22330	0.685416	5.06903	14.7356	0.00160241	0.00666237
PA14_57740	-0.68506	6.24949	22.2635	0.000272324	0.0016866
PA14_60520	0.684776	6.34014	8.20142	0.0118021	0.0330436
dapB	-0.684707	6.82927	16.4202	0.00103658	0.00475768
gdhA	-0.684653	6.69815	25.3006	0.000148049	0.00106918
PA14_06840	-0.684587	8.35193	19.6561	0.000479924	0.00261146
PA14_60490	-0.684416	7.51502	34.5707	2.988e-05	0.00031838
PA14_35860	0.684094	5.9061	21.6849	0.00030767	0.00185161
PA14_18300	0.683913	3.86192	4.04724	0.0625061	0.127889
metE	-0.683463	6.25877	3.7291	0.0725341	0.143813
PA14_69550	0.682834	3.38522	1.84113	0.194827	0.311535
PA14_01680	0.68278	2.11519	1.10528	0.309703	0.445838
antA	0.682035	4.63995	3.6278	0.0761186	0.149281
PA14_33360	0.681772	7.53776	14.9923	0.00149692	0.00633164
pcrR	-0.681692	2.53894	5.62122	0.0622668	0.127618
PA14_64560	0.681411	2.666	2.66442	0.123361	0.219268
PA14_34830	0.681267	4.18665	6.50404	0.0221449	0.0546106
PA14_55790	-0.681181	6.44471	23.0718	0.000230399	0.00149187
rluD	-0.680282	6.65967	45.6277	6.36686e-06	0.000101427
PA14_44880	0.680124	6.59689	34.3585	3.08833e-05	0.000325093
PA14_05660	-0.679928	7.50504	14.4064	0.00175025	0.00712837
PA14_03090	0.679907	7.19301	18.1192	0.000684904	0.00343201
PA14_10660	0.679852	3.71303	8.65004	0.0100882	0.0288907
hutI	0.679351	4.7512	13.9438	0.00198506	0.00791288
PA14_12160	-0.678994	6.96322	42.7391	9.25525e-06	0.000132225
PA14_58850	-0.678985	5.28385	5.73947	0.03003	0.0703026
PA14_70140	0.678981	8.55335	18.0449	0.000697086	0.00347569
PA14_70160	0.678916	7.15769	18.2452	0.000664786	0.00335143
PA14_67230	-0.678778	5.65488	8.31439	0.0113409	0.0319779
PA14_24310	-0.678471	6.95293	24.3371	0.000178664	0.00124355
PA14_13150	-0.677807	7.19917	24.5841	0.000170181	0.00120278
PA14_47640	-0.67778	3.01158	6.96024	0.0560453	0.117132
PA14_65880	0.677401	4.46343	14.6213	0.00165204	0.00680708
phnX	0.677329	3.20066	4.39232	0.0534216	0.11227
PA14_63450	-0.677305	4.56492	8.92768	0.00917083	0.0267711
PA14_72700	0.677287	6.39215	20.4123	0.000405346	0.00229568
PA14_37630	0.67724	4.62697	17.9386	0.000714961	0.00354387
oprO	0.677005	6.7158	15.6101	0.00127396	0.00558105
PA14_66450	0.676906	5.14553	4.77807	0.0450404	0.0976974
PA14_22320	-0.676659	2.6165	1.37357	0.259423	0.389036
PA14_06530	0.676653	4.97292	15.7033	0.0012437	0.0054767
exsC	0.676608	5.67864	18.9619	0.000562361	0.00293393
PA14_03166	-0.676304	7.75384	30.735	5.56019e-05	0.000508092
rluC	-0.67627	6.67365	13.6185	0.00217172	0.00855194
PA14_33530	-0.675757	5.29409	12.6931	0.00282202	0.0105283
PA14_17720	-0.675613	5.86649	13.7164	0.0021135	0.00833924
PA14_06875	-0.675483	10.3683	3.2946	0.0894896	0.170182
PA14_39090	0.675402	4.67351	12.6381	0.00286721	0.0106502
rfaE	-0.675365	7.01279	37.1515	2.02197e-05	0.000237809
PA14_54620	0.6749	7.75106	14.6513	0.00163885	0.00677474
lepA	-0.673908	9.38965	39.817	1.37863e-05	0.000178562
PA14_46990	-0.673593	4.42446	2.70271	0.120903	0.215865
rpmE	-0.673312	9.32794	8.86494	0.00936948	0.0272841
PA14_06710	-0.673291	5.26429	13.6435	0.00215666	0.00849826
algP	0.672972	10.1381	31.4707	4.91566e-05	0.00046562
PA14_16610	-0.67236	4.35938	9.80569	0.00684112	0.0211517
PA14_42820	0.672113	6.3174	45.4248	6.53244e-06	0.000103258
PA14_49480	-0.671962	9.74429	9.81995	0.00680933	0.0210972
PA14_01380	0.671904	4.69667	13.437	0.00228447	0.00890763
phnP	0.671603	4.56933	4.93076	0.0421548	0.0929528
PA14_14520	-0.671499	4.61688	14.266	0.00181802	0.00734854
PA14_22990	-0.671436	6.99287	3.58458	0.077712	0.151468
PA14_70480	-0.671307	6.56815	9.81229	0.00682639	0.0211391
PA14_61010	0.671242	8.98945	8.75106	0.00974274	0.0282468
PA14_10570	0.670964	4.74197	12.4124	0.00306135	0.0111693
rplI	-0.670925	9.46405	17.1711	0.000860593	0.0041118
gltB	-0.670547	8.78998	34.883	2.84692e-05	0.000306726
PA14_51810	-0.669929	8.0841	31.1913	5.14986e-05	0.000480922
PA14_54700	-0.669853	4.72094	4.79757	0.0446593	0.0971797
PA14_55200	0.669837	6.26169	16.2179	0.00109076	0.00491584
PA14_30880	0.669757	2.4965	4.58665	0.0489903	0.104759
PA14_18200	0.669665	3.14444	6.50211	0.0373626	0.0841156
aprI	0.669566	6.93945	19.2347	0.000528173	0.00280468
secD	-0.66929	8.29759	30.3294	5.95613e-05	0.000535243
PA14_23720	0.668097	5.67036	12.0685	0.00338662	0.0121589
PA14_15590	-0.668034	8.77111	35.8405	2.45934e-05	0.000272863
PA14_42140	0.667697	5.71194	9.5708	0.00739016	0.0224306
gltA	0.667572	9.9498	12.811	0.00272792	0.0102708
fecA	-0.667464	6.03542	26.3747	0.000120719	0.000921015
PA14_18760	-0.666983	3.13938	7.75632	0.0526991	0.111144
pilF	-0.666273	7.71102	50.1192	3.68473e-06	7.08181e-05
PA14_30410	-0.666217	9.1314	17.4027	0.000813368	0.00394308
PA14_41330	0.666164	2.29905	2.44408	0.152798	0.25893
PA14_21550	0.664879	6.69212	21.1203	0.000347259	0.00202641
PA14_24610	0.664601	5.24096	22.9357	0.000236916	0.00152435
PA14_00680	0.664019	2.40274	5.5576	0.0619398	0.127079
amiB	-0.663845	8.03794	29.0162	7.47567e-05	0.000639025
PA14_36460	0.66334	4.4487	7.02918	0.0181094	0.0464596
PA14_06360	-0.662513	3.54765	2.30932	0.149332	0.254205
PA14_26970	-0.662029	6.61277	36.6118	2.19035e-05	0.000249349
mutY	-0.661956	5.5586	23.2675	0.000221386	0.00144788
PA14_12090	-0.661606	7.67007	46.5851	5.64703e-06	9.31995e-05
PA14_16680	0.661575	7.79728	21.5251	0.000318325	0.0019042
PA14_48810	0.661467	5.63167	22.5219	0.000258046	0.00161157
PA14_03330	-0.661398	4.45439	4.11805	0.0605024	0.124602
rpoD	-0.660959	11.2364	20.6944	0.000380976	0.00218465
PA14_42150	0.660812	6.25045	18.2576	0.000662847	0.00334682
metY	-0.660745	5.85711	19.5053	0.000496593	0.00268485
PA14_44830	0.660603	6.17499	24.2897	0.000180344	0.00125232
PA14_08640	-0.659143	6.4139	16.5597	0.001001	0.0046268
PA14_16440	-0.658888	4.48425	19.7617	0.000468626	0.00256847
PA14_31840	0.658629	5.04387	19.8038	0.000464209	0.00255144
PA14_37290	0.658175	6.7194	12.3561	0.00311203	0.0113334
PA14_43760	0.656873	5.82354	9.62965	0.007248	0.0221227
PA14_24120	-0.656583	2.31929	0.540276	0.47362	0.611481
rrmJ	-0.65613	7.71731	46.2956	5.85443e-06	9.53025e-05
moeB	-0.656052	5.12522	16.6737	0.000972947	0.00452865
PA14_52300	0.655796	4.61248	6.09295	0.0260382	0.0624038
acoB	0.655464	6.96551	1.36992	0.260029	0.38968
PA14_10070	0.655321	1.7603	3.12044	0.14137	0.243716
algK	-0.655137	2.06461	0.686321	0.420366	0.560425
PA14_37080	0.654145	2.9946	5.10705	0.0390873	0.0873527
PA14_43540	0.654059	4.74017	15.9806	0.00115845	0.00517395
PA14_34130	-0.653843	5.17264	10.1822	0.00605543	0.0192623
parB	-0.653804	7.78329	39.1353	1.51767e-05	0.000190364
PA14_59380	0.653798	5.83058	30.8466	5.45645e-05	0.000500925
PA14_07650	0.652995	9.94491	28.0678	8.84787e-05	0.000728445
PA14_13670	0.652207	1.72069	1.18243	0.293975	0.427909
glpF	-0.652181	9.04681	16.601	0.000990721	0.00458641
PA14_23170	0.652179	3.94839	12.1651	0.00329144	0.0118995
gcvH1	0.651783	7.67586	12.2163	0.00324224	0.011743
narK1	0.651732	4.34504	4.65087	0.0476216	0.10243
prfC	-0.651518	6.91187	25.3981	0.000145297	0.00105571
PA14_37910	-0.651367	2.24103	3.34617	0.0872475	0.166616
PA14_16180	-0.651244	7.18282	22.6254	0.000252569	0.0015907
PA14_70550	0.650514	5.03232	21.0581	0.000351967	0.00204787
PA14_63210	0.650398	7.18764	18.6516	0.000604329	0.00309862
PA14_36230	-0.650277	3.37649	10.533	0.00541519	0.0176112
PA14_10040	0.648296	5.25676	19.0609	0.000549675	0.00289563
PA14_64690	-0.648012	3.31419	3.60669	0.0768918	0.150253
flhB	-0.64797	5.43101	12.1233	0.00333221	0.0120177
PA14_72630	-0.647962	4.84148	15.9528	0.00116671	0.00519914
PA14_46330	0.647921	3.67715	10.4976	0.00547619	0.0177676
PA14_50970	0.647516	6.04231	20.1833	0.000426447	0.00238123
PA14_38910	0.647508	1.2604	0.889364	0.360546	0.49887
ostA	-0.64727	10.9622	32.0787	4.44658e-05	0.000428434
PA14_22870	-0.647233	5.37712	12.2496	0.00321061	0.0116639
PA14_04020	-0.647056	3.71325	9.85302	0.00673623	0.0209143
PA14_63940	0.646764	3.66296	5.73945	0.0300302	0.0703026
hcnA	0.646388	5.96801	13.6127	0.00217521	0.00855438
PA14_30760	-0.646367	4.35518	7.06966	0.0178353	0.0459613
PA14_53390	0.646228	4.96433	16.5407	0.00100576	0.00463801
PA14_07330	-0.64612	7.73538	8.73071	0.00981119	0.02829
PA14_67030	-0.645751	5.79501	18.1503	0.000679878	0.00341832
PA14_50860	0.645356	5.88741	19.5293	0.000493895	0.00267883
PA14_05510	-0.644705	9.21338	34.8368	2.86732e-05	0.000308367
PA14_48320	0.644627	4.33207	10.1662	0.00608663	0.0193512
PA14_11180	0.644374	2.86589	3.60526	0.0769447	0.150307
PA14_31850	0.644337	6.00044	30.668	5.62347e-05	0.000512303
aprA	0.643349	11.6986	8.73872	0.0097842	0.028273
PA14_07870	0.643256	9.67584	6.89885	0.0190255	0.0482975
PA14_18070	-0.643206	4.02047	3.09206	0.0989912	0.184482
PA14_28180	0.642903	7.07822	6.82106	0.0195979	0.0495393
glnK	0.642609	9.19692	19.3396	0.000515665	0.00275299
merT	0.642452	4.79184	16.6914	0.000968672	0.00451592
PA14_69060	-0.641251	6.66296	30.8165	5.48428e-05	0.000502697
PA14_26000	0.641208	3.10613	7.35733	0.0160191	0.0422308
PA14_61170	-0.640474	3.4234	2.48358	0.135828	0.236835
PA14_31890	-0.640028	6.24838	12.8941	0.00266375	0.0100894
pilI	-0.639447	5.67567	12.8165	0.00272361	0.0102646
PA14_21520	0.639054	5.09089	12.8419	0.00270384	0.0102088
ispB	-0.638891	7.43712	21.9771	0.00028921	0.00175648
PA14_44190	0.638523	3.14964	10.9157	0.00805098	0.0240079
sbp	-0.638383	7.98982	2.42925	0.139871	0.241973
PA14_04190	0.638377	4.74869	7.29162	0.0164144	0.04295
PA14_57540	-0.637907	9.1098	25.5785	0.000140357	0.00103881
pdxB	-0.637871	6.47741	22.5827	0.000254812	0.00159976
PA14_53750	0.636756	4.16266	18.1742	0.00105258	0.00479822
ligT	0.636698	2.17667	3.15958	0.0956953	0.179519
PA14_28810	-0.636527	9.45801	26.8475	0.00011054	0.000859786
nirH	-0.63645	4.81945	6.92327	0.0188499	0.0479948
rep	-0.636406	6.81512	37.233	1.99784e-05	0.000235706
cysA	-0.636193	6.23964	7.42542	0.0156209	0.0414195
PA14_51640	0.636166	2.87787	3.24017	0.0919316	0.173827
fdhA	0.636163	3.96203	11.1084	0.00452512	0.015336
PA14_22660	-0.635864	5.72624	7.41132	0.0157024	0.0416047
PA14_23770	0.635787	3.82847	7.37835	0.0158949	0.0420325
PA14_21810	-0.63556	2.25022	0.658311	0.429805	0.570202
cobD	-0.635465	2.1953	2.85485	0.111705	0.202473
ndk	-0.635407	9.16914	27.8193	9.25315e-05	0.000748527
PA14_39220	0.635196	1.07561	2.02916	0.249589	0.377232
PA14_44170	0.635067	6.65315	16.1574	0.00110758	0.00498412
yciI	-0.635025	5.8664	6.23995	0.0245615	0.0594142
PA14_27450	0.634995	2.71143	4.41039	0.0529902	0.1116
rpsO	-0.634773	11.0131	13.7275	0.00210703	0.00831921
PA14_02700	0.634607	2.21269	1.01763	0.32903	0.465976
PA14_18600	-0.634537	6.18188	9.31744	0.00803969	0.0239982
PA14_34920	0.634397	1.20888	0.643221	0.435031	0.574704
dnaB	-0.634391	7.6869	25.8328	0.000133716	0.000998585
PA14_71250	-0.634317	2.02671	1.25095	0.363523	0.502406
PA14_38360	0.634314	4.58043	5.03516	0.0403058	0.0895717
PA14_66170	-0.633636	8.90518	28.2363	8.58444e-05	0.000714331
PA14_49010	0.633629	1.8225	2.21497	0.179327	0.2928
metR	0.633609	5.23481	23.0399	0.000231909	0.00149861
fliC	0.632815	13.2262	8.96808	0.00904548	0.0264961
PA14_48280	0.631407	2.07565	2.52262	0.2254	0.347951
nuoI	0.631295	5.76627	22.678	0.000249831	0.00158327
PA14_47750	-0.631126	2.56844	4.00791	0.105813	0.194159
prtR	-0.630977	5.65484	17.0717	0.000881823	0.00417639
PA14_00990	-0.630945	6.87189	20.1738	0.00042734	0.00238398
iciA	0.630527	4.48304	7.39029	0.0158249	0.0418671
PA14_28400	-0.630305	9.33987	16.5443	0.00100487	0.00463801
PA14_62110	-0.629577	7.25687	23.5179	0.000210432	0.00139772
PA14_12860	-0.629155	5.49781	10.3549	0.00572998	0.0184301
PA14_22650	-0.629029	4.52183	5.8473	0.0287415	0.0678454
kynB	0.629021	4.66647	17.5247	0.000789676	0.00384921
PA14_48630	0.628973	3.33789	9.56754	0.00739812	0.0224306
PA14_16920	-0.62897	3.89103	9.68135	0.0071257	0.0218443
PA14_15940	-0.628893	5.19908	8.36967	0.0111229	0.0314523
rpsF	-0.628518	9.88328	10.0528	0.00631333	0.0198347
PA14_14430	-0.627339	4.17383	3.96248	0.0650083	0.131744
PA14_06920	-0.627323	3.4275	1.02265	0.327877	0.464709
PA14_72020	-0.627306	6.04557	8.95404	0.00908882	0.0265838
PA14_60660	-0.626966	4.47841	6.78001	0.0199078	0.0501102
PA14_29440	0.626781	3.16848	6.01063	0.02691	0.064135
PA14_40940	-0.626728	4.58787	8.87949	0.00932295	0.0271619
PA14_05960	-0.626454	12.1369	6.56889	0.0215941	0.0534293
prpD	0.626325	6.06413	20.0482	0.000439472	0.00244479
recC	-0.626292	6.36653	29.6302	6.71634e-05	0.000590205
cysW	-0.625941	4.90023	4.58645	0.0489948	0.104759
PA14_42750	-0.625761	4.18563	9.33543	0.00799149	0.0239239
PA14_10400	0.625194	0.732696	0.449947	0.643984	0.769371
PA14_48960	0.624856	0.632066	0.530808	0.643984	0.769371
fusA2	0.624845	9.60571	21.0291	0.000354184	0.00205675
PA14_16800	0.624672	5.90027	10.0144	0.00639205	0.0200547
PA14_01170	-0.624573	3.38238	2.13785	0.164274	0.273775
PA14_37270	0.624388	7.58165	16.2586	0.00107959	0.00488028
PA14_48410	-0.624178	3.36245	3.43362	0.103687	0.191551
retS	-0.623909	7.14382	23.9601	0.000192551	0.00131411
PA14_36790	-0.623847	3.70206	4.80645	0.0444871	0.0969474
yqgF	-0.623817	4.05094	2.19686	0.158931	0.267338
PA14_58350	0.62373	9.08336	23.7012	0.0002028	0.00135915
PA14_22140	-0.623501	4.84732	13.3336	0.00235168	0.00911599
PA14_11260	-0.623471	6.00577	16.7367	0.000957826	0.00447236
PA14_53270	0.6234	4.41104	11.1431	0.00447709	0.0151991
PA14_38570	0.623095	5.43122	16.9183	0.000915736	0.00431984
creB	-0.622938	5.71284	9.90662	0.00661965	0.0206168
cpxR	-0.622884	4.54524	12.4676	0.00301252	0.0110589
nusA	-0.622749	10.9846	13.5962	0.00218521	0.00858136
PA14_55090	0.622701	7.02361	31.2638	5.08793e-05	0.000477208
PA14_11370	0.622118	3.72336	7.95407	0.012889	0.0356677
phoP	0.62184	5.94667	31.2138	5.13057e-05	0.000479873
PA14_60760	-0.62152	5.11353	13.1801	0.00245568	0.0094198
infA	-0.62133	7.66568	14.8726	0.0015451	0.00649204
PA14_04210	0.621246	4.42654	12.5008	0.00298351	0.0110067
PA14_56970	0.621017	3.74731	7.92894	0.013288	0.0365682
aotJ	0.620999	9.11482	7.20168	0.0169739	0.0441424
PA14_06300	0.620903	6.18085	13.5616	0.00220633	0.00864824
PA14_69030	-0.620855	6.94272	31.7078	4.72634e-05	0.000450553
PA14_28390	-0.620766	3.69584	5.78136	0.0613117	0.125877
PA14_36960	0.620641	5.27594	9.35341	0.00794362	0.0237949
PA14_41990	0.620618	2.18249	3.65413	0.163724	0.273154
PA14_01480	0.620354	3.59059	7.31599	0.0162665	0.0426566
PA14_29390	-0.620188	6.62594	9.9974	0.00642743	0.0201339
PA14_28250	0.620187	7.67451	29.3307	7.07524e-05	0.000615133
PA14_26090	-0.620121	3.96093	4.59817	0.0487416	0.104386
glyA1	0.61972	3.56793	9.61263	0.00728879	0.0222245
putA	-0.619408	8.9529	10.6963	0.00514364	0.0169783
rpsT	-0.619251	9.68878	9.32725	0.00801336	0.023964
PA14_61830	0.619038	0.464238	0.443735	0.538711	0.67503
PA14_41780	0.618982	6.27925	17.7031	0.000756445	0.00372163
PA14_71390	0.618847	5.47672	18.5046	0.000625444	0.00319314
PA14_13690	0.618776	4.4666	9.44822	0.0076966	0.0231949
PA14_20600	0.618367	7.8217	24.4662	0.00017417	0.00122371
gnd	0.617882	6.18742	32.8108	3.94771e-05	0.000391355
PA14_12140	0.617746	4.89012	20.4424	0.000402668	0.00228703
PA14_64940	0.617609	5.58923	10.6481	0.00522213	0.0171424
PA14_47430	0.617461	4.99019	6.77279	0.0199629	0.0502275
PA14_04370	-0.616578	4.98997	5.72565	0.0301999	0.0706166
PA14_34900	0.616476	4.59595	5.77494	0.0295989	0.0694566
PA14_00900	0.616056	2.63008	4.85682	0.0435244	0.0953413
phhA	0.615859	10.0777	23.7169	0.00020216	0.00135638
PA14_33590	-0.615678	4.37292	8.50461	0.0106104	0.0301894
PA14_46650	-0.615677	3.76173	8.36287	0.0111494	0.0315125
PA14_51840	-0.615606	6.04459	6.79301	0.019809	0.0499459
PA14_54230	-0.615104	2.70493	3.62786	0.0761166	0.149281
ung	0.615032	6.16391	9.65388	0.00719039	0.0220033
PA14_68060	0.614634	7.49507	18.8221	0.000580846	0.0030119
PA14_12350	-0.614138	7.33056	34.4387	3.04999e-05	0.000322196
phoA	0.614112	4.8415	3.24227	0.0918359	0.173701
PA14_64780	-0.614005	2.46506	2.45046	0.138276	0.239906
PA14_11340	-0.613317	7.04791	16.3397	0.00105777	0.00481083
PA14_30860	0.613079	1.53141	0.911975	0.354683	0.493853
xylS	0.612863	3.99247	7.85688	0.0133471	0.0366583
PA14_01140	-0.612832	4.32745	4.18544	0.0586651	0.121575
PA14_27930	0.612636	6.06498	13.3698	0.00232791	0.00904743
gapA	-0.612508	7.43728	27.8229	9.24724e-05	0.000748527
pgsA	-0.612392	6.35959	12.3998	0.00307256	0.0111965
PA14_41030	0.612266	5.63877	27.7026	9.45074e-05	0.00075784
PA14_70890	-0.612034	0.575196	0.372627	0.550685	0.685681
PA14_53420	0.611952	8.49695	19.9634	0.000447881	0.00247818
PA14_11620	-0.611656	2.96508	4.26525	0.0662037	0.133643
PA14_55930	0.610616	7.58874	9.09355	0.00866855	0.0255933
PA14_34930	-0.610527	1.12976	0.501665	0.489597	0.627856
htrB	-0.610445	5.21237	11.0491	0.00460861	0.015557
PA14_44770	0.609913	6.31874	13.1375	0.00248546	0.00951696
PA14_68080	0.609854	5.49677	22.6383	0.000251891	0.0015894
dsbC	-0.609795	7.57166	15.685	0.00124958	0.00549277
PA14_28930	0.609774	2.66622	4.9074	0.0425821	0.0936105
PA14_49720	-0.609045	2.65588	4.97573	0.0436592	0.0955275
PA14_46900	-0.608806	1.15105	1.03802	0.377153	0.517283
PA14_72170	0.608767	4.67665	11.4309	0.00409999	0.0141446
PA14_26300	0.608573	3.97405	5.87382	0.0284345	0.067254
PA14_39610	-0.608346	6.00935	23.9271	0.000193826	0.00131852
gidB	-0.608174	6.80287	18.033	0.000699066	0.00348247
PA14_57690	0.608066	8.13994	20.3889	0.000407444	0.00230537
PA14_15490	0.608	3.55763	4.13236	0.0994399	0.185145
PA14_21070	-0.607815	4.35373	4.88378	0.0430191	0.094439
PA14_56590	0.607811	9.34569	5.41955	0.0342654	0.0781598
lpdG	0.607477	9.72999	23.2826	0.000220709	0.00144504
PA14_67440	0.607471	6.60849	10.227	0.00596912	0.0190386
parC	-0.607416	7.24217	27.0453	0.000106574	0.000834389
PA14_50010	-0.607272	6.20644	16.1426	0.00111173	0.00499901
PA14_51260	-0.60709	7.4216	27.6787	9.49188e-05	0.000760116
PA14_18340	0.60703	1.91359	1.146	0.429167	0.569737
PA14_13210	-0.607015	4.30326	8.17421	0.0119164	0.0333479
PA14_46840	0.606552	5.4304	11.7935	0.00367534	0.0129495
PA14_50680	-0.606087	4.14671	8.24582	0.0116183	0.0326519
PA14_07930	-0.605815	5.02611	14.5818	0.00166961	0.00685565
metH	0.605632	8.27306	24.6271	0.000168752	0.00119409
PA14_47380	-0.605564	5.02637	13.9669	0.0019725	0.00788205
PA14_64840	0.605514	5.03278	14.0962	0.00190398	0.00764414
PA14_66460	0.605394	7.9913	11.1966	0.00440397	0.0149851
prtN	0.605103	5.10179	21.0492	0.000352643	0.0020498
PA14_47550	0.604822	7.22268	19.1559	0.0005378	0.00284061
PA14_38180	-0.604819	5.94386	7.4861	0.0152757	0.0406852
PA14_50590	-0.60468	6.40399	18.1424	0.000681155	0.00341897
PA14_61080	-0.604658	3.96754	4.15854	0.0593905	0.122736
xcpW	-0.604405	5.28389	26.3742	0.000120731	0.000921015
PA14_51050	0.604304	4.9743	4.01976	0.0633046	0.128903
dinG	-0.604297	6.16014	27.7546	9.36221e-05	0.000755827
fpvA	-0.60428	8.24033	10.0538	0.00631116	0.0198347
PA14_26570	0.604075	5.37967	31.4052	4.96951e-05	0.000469658
PA14_48710	0.603869	5.28125	11.8248	0.00364113	0.0128823
ddlA	0.603695	6.55909	35.276	2.68002e-05	0.000292446
PA14_20750	0.603646	10.8921	14.2119	0.00184489	0.00742692
PA14_24665	-0.603638	5.57669	13.1783	0.00245693	0.0094198
PA14_31190	0.603096	2.37651	3.55136	0.0789634	0.153396
dut	-0.60293	5.09316	11.6479	0.00383945	0.0134482
rpsG	-0.60289	10.3207	13.9943	0.00195775	0.00783361
PA14_45090	-0.602016	3.47703	7.74444	0.0139008	0.0378869
potB	0.600847	3.60891	5.35161	0.0720647	0.143073
PA14_56450	0.600799	4.35339	12.2691	0.0031923	0.0116116
PA14_60930	0.600642	6.2423	25.3235	0.000147395	0.00106575
PA14_11150	0.600487	2.06539	3.8285	0.229715	0.352743
PA14_53860	0.60025	4.25937	10.6193	0.00526972	0.0172511
wzt	-0.600124	7.46737	10.4894	0.00549039	0.0177781
ponA	-0.600039	9.0274	29.5204	6.84549e-05	0.000598905
PA14_17580	0.599702	7.66937	11.7052	0.00377393	0.0132734
PA14_00860	-0.59958	1.23068	0.368526	0.55286	0.68767
PA14_37650	0.598348	4.48605	13.4953	0.00224753	0.00878661
PA14_17370	-0.598149	5.50935	14.4922	0.0017103	0.00699378
PA14_48870	-0.597534	7.19526	19.427	0.000505501	0.00271576
PA14_47530	0.597233	5.38584	10.24	0.00594421	0.01901
PA14_24340	-0.596972	5.28369	22.0133	0.000287011	0.00174592
PA14_71410	0.596867	4.2355	11.1497	0.00446797	0.0151768
leuS	-0.59662	8.96944	20.2212	0.000422862	0.0023701
PA14_10240	0.596546	7.04056	0.921142	0.352345	0.491517
PA14_62030	-0.596369	5.81103	19.0105	0.000556088	0.00291756
fliQ	-0.595331	4.16149	3.96321	0.0649865	0.131744
accA	0.595222	10.0784	12.8098	0.00272888	0.0102708
PA14_22880	-0.595013	3.6827	6.62291	0.0211475	0.0525643
PA14_01130	-0.594883	3.97781	8.04879	0.0124597	0.0346892
PA14_38140	0.594485	7.57515	7.21697	0.0168772	0.0439102
PA14_60180	0.594298	1.64511	0.375841	0.548993	0.684448
PA14_10900	0.593803	1.40872	1.87159	0.228993	0.351906
PA14_02740	0.593573	3.69529	11.9297	0.0042512	0.0145651
PA14_59950	-0.593394	2.11167	3.29332	0.259218	0.388826
PA14_49780	0.592836	3.23368	3.74818	0.0718814	0.142834
kdpA	0.592392	2.66607	3.96776	0.144697	0.247803
pilH	-0.592087	7.54751	20.5159	0.000396197	0.00225458
PA14_65060	-0.592037	5.14956	25.4146	0.000144836	0.00105364
PA14_65080	-0.591959	7.65868	11.6962	0.00378409	0.0132934
rpsH	-0.591182	10.5748	18.4202	0.000637938	0.00324127
PA14_28150	0.591037	5.27618	14.8456	0.0015562	0.00651088
PA14_60630	-0.590637	5.01662	6.69857	0.0205396	0.0513861
PA14_21260	0.590304	6.66255	4.79293	0.0447497	0.0972706
PA14_38310	0.590106	3.12478	2.39134	0.14278	0.245366
PA14_18910	-0.589413	3.29758	2.47146	0.136717	0.237629
pssA	-0.588893	7.85006	22.5845	0.000254716	0.00159976
PA14_14310	0.588383	5.96105	8.14751	0.0120297	0.0336177
PA14_13170	-0.588355	6.21697	21.7057	0.00030631	0.00185052
PA14_08460	0.588339	6.107	17.3161	0.000830664	0.00400412
PA14_16670	0.587618	6.44736	19.5232	0.000494581	0.00267883
PA14_41640	0.587046	8.28542	10.0518	0.00631528	0.0198347
PA14_47560	0.586815	2.65809	5.25441	0.0367216	0.0829996
PA14_23570	0.586615	2.6933	1.55251	0.231818	0.355239
PA14_00530	-0.586495	4.98442	7.25332	0.01665	0.0434328
PA14_35300	0.586351	5.16908	16.4832	0.00102034	0.00469799
PA14_49960	-0.585607	5.14052	8.68821	0.00995602	0.0286145
PA14_37870	0.585559	1.82146	2.80761	0.114468	0.206541
PA14_35930	-0.585466	0.405851	0.283199	0.798984	0.891474
ccmH	-0.584332	4.5896	19.7503	0.000469831	0.00257048
sdaA	0.58343	6.65177	20.3197	0.000413733	0.00233209
PA14_43650	-0.583372	5.84905	20.556	0.00039272	0.00223693
ppk	-0.58291	8.20273	15.9578	0.00116521	0.00519636
PA14_06980	-0.582769	7.07408	13.3972	0.0023101	0.00898994
PA14_04530	0.582628	4.59486	13.5532	0.00221153	0.00866292
valS	-0.582269	8.51936	22.7544	0.000245923	0.00157043
PA14_06580	0.581934	6.95539	12.9508	0.00262093	0.00995252
[truncated: 3,959 more rows]

## Sheet: 2-edgeR_Pa_on_CAF2vypd
genes	logFC	logCPM	F	PValue	FDR
PA14_63770	7.80971	1.74919	27.2605	0.000162981	0.000616533
PA14_26690	7.73115	7.6685	169.748	1.34075e-09	1.02412e-07
PA14_26730	7.68893	9.72159	588.283	1.77802e-13	5.29672e-10
PA14_26720	7.46464	10.1003	397.514	3.11946e-12	3.47478e-09
PA14_26750	7.32053	10.9797	794.569	1.93985e-14	1.15576e-10
PA14_26670	6.93198	8.62557	210.49	2.97396e-10	4.5433e-08
PA14_55290	6.766	5.7622	54.3362	2.28114e-06	1.89026e-05
PA14_55300	6.69763	5.36501	59.1895	1.36108e-06	1.28312e-05
PA14_63780	6.62749	5.247	78.4045	2.35621e-07	3.44075e-06
PA14_10280	6.61244	7.12776	44.3725	7.47354e-06	4.69203e-05
PA14_55540	6.44696	8.41424	38.0195	1.78102e-05	9.65543e-05
PA14_26700	6.36699	10.0841	203.286	3.80066e-10	5.15862e-08
PA14_10270	6.36071	5.84891	48.1482	4.66128e-06	3.21806e-05
PA14_10240	6.3499	7.04056	41.2877	1.1251e-05	6.59779e-05
PA14_55330	6.28574	4.82319	53.5281	2.49482e-06	2.01959e-05
PA14_55410	6.14005	10.7369	37.2759	1.98528e-05	0.000104954
phzC1	6.05823	6.88886	271.719	4.84941e-11	1.44464e-08
PA14_26650	5.97708	7.40993	283.564	3.57287e-11	1.20304e-08
mgtA	5.87292	8.97317	102.856	4.03124e-08	9.49332e-07
PA14_55280	5.76105	5.5952	55.0872	2.10098e-06	1.77643e-05
phzD1	5.49681	7.25169	231.448	1.52004e-10	3.23442e-08
PA14_44590	5.40933	8.643	295.389	2.66529e-11	9.92487e-09
PA14_63820	5.39152	6.32166	91.0282	8.99414e-08	1.75121e-06
PA14_11190	5.2455	6.26031	84.2918	1.4807e-07	2.48507e-06
phzG1	5.20798	5.74337	73.1134	3.6714e-07	4.75867e-06
PA14_37290	5.16679	6.7194	341.22	9.43115e-12	5.61908e-09
PA14_26200	-5.14061	0.533447	30.1818	0.00429192	0.0102862
PA14_71110	-5.07903	0.865284	17.8004	0.00579729	0.0133052
PA14_00620	5.04331	8.43821	277.295	4.1934e-11	1.31496e-08
phnD	5.03349	7.14931	76.9373	2.65764e-07	3.73678e-06
PA14_37270	4.97781	7.58165	472	8.92617e-13	1.77274e-09
exbD2	4.96894	3.66253	58.7355	1.42634e-06	1.33829e-05
PA14_13880	-4.95526	0.0500099	15.3893	0.00784498	0.0172793
fepD	-4.91419	2.07654	27.0086	0.000107298	0.000433412
PA14_37310	4.90298	6.71902	258.757	6.87569e-11	1.86206e-08
phzE1	4.85614	9.46332	185.683	7.17391e-10	6.89389e-08
PA14_37260	4.84611	8.40126	398.508	3.06341e-12	3.47478e-09
phzC2	4.71692	9.64432	102.144	4.22087e-08	9.63359e-07
PA14_48550	4.68617	4.6215	136.654	5.96805e-09	2.5581e-07
dctA	4.65923	9.31767	137.195	5.8092e-09	2.54494e-07
actP	4.61324	9.39781	143.397	4.29373e-09	2.06307e-07
PA14_61330	4.57151	7.00869	61.7131	1.05463e-06	1.08746e-05
acoR	4.53473	9.83684	70.3498	4.67896e-07	5.70087e-06
phzF2	4.48269	6.84621	197.939	4.58389e-10	5.15862e-08
PA14_37150	4.47232	4.26433	183.594	7.7642e-10	7.34271e-08
PA14_60480	-4.42075	6.7405	98.6279	5.31864e-08	1.13173e-06
phzF1	4.41742	6.85712	178.957	9.28238e-10	8.11966e-08
PA14_28190	-4.36607	1.1471	18.1953	0.000672664	0.00205525
PA14_17910	4.34925	7.63304	352.093	7.51772e-12	5.39435e-09
exbB2	4.34829	5.65646	61.7867	1.04695e-06	1.08746e-05
adh	4.32784	7.25122	27.2414	0.000102801	0.000418651
phzG2	4.27707	8.12887	130.124	8.32788e-09	3.30783e-07
PA14_58040	-4.21277	6.43896	145.066	3.96647e-09	1.93707e-07
PA14_55260	4.20725	3.78203	85.8458	1.31592e-07	2.31276e-06
PA14_54550	4.1918	3.38146	72.1997	3.97443e-07	5.0816e-06
katB	4.19161	8.834	51.1129	3.28185e-06	2.51005e-05
PA14_37250	4.14198	9.9508	311.437	1.82211e-11	8.35089e-09
phnK	4.13968	4.3607	113.217	2.12819e-08	6.22704e-07
phnL	4.09401	4.25848	161.325	1.90804e-09	1.2348e-07
acoB	4.08123	6.96551	26.8195	0.000111115	0.00044491
PA14_00600	4.0677	5.66954	264.779	5.83441e-11	1.65531e-08
PA14_18800	-4.0653	6.08368	224.412	1.89167e-10	3.75685e-08
PA14_55250	4.05175	4.83241	51.7853	3.03757e-06	2.35957e-05
ahpF	4.02853	8.96707	114.575	1.96486e-08	5.94245e-07
fepB	-4.00684	3.91927	42.0028	1.02125e-05	6.0846e-05
hpaC	3.96159	4.04826	103.529	3.86092e-08	9.20134e-07
PA14_18150	3.89248	7.74033	142.323	4.52057e-09	2.13758e-07
PA14_37210	3.86828	8.67269	351.925	7.54374e-12	5.39435e-09
PA14_18680	-3.85549	7.45567	161.089	1.92743e-09	1.2348e-07
phzS	3.85027	7.42614	238.282	1.23643e-10	2.83333e-08
ampC	-3.84154	6.09515	201.845	3.9957e-10	5.15862e-08
PA14_63750	3.82608	5.91162	82.4318	1.7095e-07	2.7576e-06
PA14_10360	-3.79941	13.3228	190.587	5.97762e-10	6.03639e-08
phnE	3.77694	5.22427	132.143	7.50059e-09	3.08197e-07
PA14_37200	3.76117	8.76229	324.326	1.36057e-11	6.75524e-09
PA14_55110	-3.75683	3.52591	148.01	3.45558e-09	1.79029e-07
PA14_07870	3.74804	9.67584	122.699	1.23954e-08	4.18165e-07
PA14_55470	3.72002	2.71157	13.4572	0.00227161	0.0059179
mmsB	3.7073	7.03215	140.195	5.01149e-09	2.31461e-07
PA14_24790	3.70612	9.1017	234.879	1.36936e-10	3.02171e-08
PA14_55400	3.68195	9.8426	83.0579	1.62828e-07	2.65788e-06
PA14_55390	3.66756	4.87505	23.6291	0.000205763	0.000751648
PA14_19970	-3.62536	3.0459	18.544	0.000619703	0.00192743
PA14_39800	-3.61248	3.66242	16.2881	0.00107159	0.00308431
PA14_11230	3.56721	3.61206	61.6405	1.06227e-06	1.08746e-05
PA14_54540	3.55547	6.26394	229.089	1.63456e-10	3.35818e-08
PA14_48540	3.51557	5.60769	143.837	4.20455e-09	2.03664e-07
PA14_06450	3.49528	6.76797	77.0029	2.64326e-07	3.73188e-06
PA14_49620	3.48899	2.41649	42.0584	1.01365e-05	6.05238e-05
PA14_32710	-3.48337	4.34911	23.3665	0.000216979	0.000786831
PA14_54570	3.44854	5.75816	155.079	2.50642e-09	1.47854e-07
PA14_06460	3.44384	6.55932	71.6351	4.17585e-07	5.23783e-06
PA14_07890	3.44276	7.87932	146.686	3.67543e-09	1.85578e-07
lldD	3.42681	6.50095	119.928	1.44592e-08	4.75956e-07
zwf	-3.42592	7.70794	295.492	2.65862e-11	9.92487e-09
PA14_22340	3.42386	8.3753	66.875	6.42085e-07	7.37098e-06
PA14_44580	3.38543	6.74311	202.803	3.8648e-10	5.15862e-08
PA14_55750	3.36324	7.49834	87.3141	1.1791e-07	2.14179e-06
PA14_48590	3.34492	5.67004	127.082	9.77668e-09	3.76729e-07
PA14_06480	3.33909	6.67794	64.7261	7.86293e-07	8.7729e-06
PA14_58410	3.3331	9.68703	218.175	2.30898e-10	4.04077e-08
tonB	-3.32493	7.64661	201.172	4.09064e-10	5.15862e-08
pvdS	-3.31345	7.51873	166.335	1.54374e-09	1.08207e-07
PA14_57610	3.3045	8.45646	193.579	5.3594e-10	5.60199e-08
phnH	3.294	3.27918	37.101	2.03709e-05	0.00010684
fadH1	3.28386	7.28459	176.127	1.03729e-09	8.5836e-08
hcnB	3.28364	7.17812	174.538	1.10486e-09	9.01748e-08
PA14_34610	-3.27357	1.44028	10.7462	0.00506396	0.0118498
PA14_55100	-3.27035	5.08814	106.269	3.24664e-08	8.23126e-07
lasI	3.26682	9.33607	219.09	2.24163e-10	4.04077e-08
PA14_49570	3.2578	4.91615	52.7638	2.71803e-06	2.15763e-05
PA14_19680	-3.25156	3.30463	42.4911	9.56581e-06	5.76853e-05
PA14_00590	3.21634	5.06283	168.263	1.42512e-09	1.03715e-07
PA14_49690	-3.21003	5.99316	105.424	3.42341e-08	8.54307e-07
fabH2	3.20713	5.33443	85.054	1.39713e-07	2.39199e-06
PA14_55320	3.20707	6.25001	83.7217	1.54691e-07	2.55304e-06
phoB	-3.20001	6.85758	49.9434	3.76167e-06	2.7601e-05
PA14_48610	3.19536	3.86766	198.389	4.51123e-10	5.15862e-08
PA14_39870	3.19369	6.51896	81.0313	1.90834e-07	2.9609e-06
pa1L	-3.17937	8.77391	154.548	2.56641e-09	1.49908e-07
PA14_10200	-3.17752	6.54259	188.527	6.4503e-10	6.30014e-08
PA14_20980	3.17529	5.45057	89.4864	1.00522e-07	1.91346e-06
PA14_36500	3.175	7.78688	88.446	1.08459e-07	2.0257e-06
gnyA	3.17124	8.13841	55.4832	2.01251e-06	1.71538e-05
PA14_11210	3.16572	5.57136	48.5759	4.42665e-06	3.09212e-05
algA	3.15452	5.51929	32.2741	4.30679e-05	0.000203488
PA14_48560	3.15113	6.24353	131.229	7.86296e-09	3.18691e-07
PA14_37170	3.14068	5.28698	126.56	1.0053e-08	3.76746e-07
PA14_13460	-3.13501	3.52402	16.3667	0.00105061	0.00302953
PA14_21010	3.12346	5.73428	146.851	3.64713e-09	1.85578e-07
PA14_07900	3.11974	7.01257	116.453	1.76193e-08	5.41111e-07
PA14_64620	-3.10456	2.66801	21.0278	0.000354282	0.00118742
mmsA	3.10029	8.9154	119.255	1.50174e-08	4.86269e-07
PA14_37320	3.09047	4.80415	211.327	2.89193e-10	4.53424e-08
PA14_47390	-3.08093	4.9659	113.226	2.12711e-08	6.22704e-07
PA14_10850	3.07665	5.85545	99.3106	5.08234e-08	1.09316e-06
PA14_13340	3.0707	7.17028	47.2156	5.22342e-06	3.52049e-05
gnyH	3.07006	6.61606	77.3615	2.56622e-07	3.65118e-06
PA14_47400	-3.06697	4.88816	73.4252	3.57403e-07	4.69033e-06
katA	3.06664	11.2781	39.8322	1.3757e-05	7.79126e-05
phnI	3.0586	4.23139	122.15	1.27764e-08	4.25262e-07
pscE	-3.01361	0.513418	7.35621	0.0160257	0.031987
PA14_13950	-3.01293	6.49068	112.162	2.26569e-08	6.45885e-07
acsA	3.01189	10.3692	63.2459	9.06999e-07	9.80744e-06
PA14_37745	3.01178	8.23503	118.744	1.5457e-08	4.96528e-07
PA14_55631	-3.0064	12.2601	10.2936	0.00584331	0.0133827
fptA	-2.98772	8.32438	183.103	7.911e-10	7.36464e-08
PA14_60810	-2.97368	4.52028	149.533	3.22074e-09	1.76341e-07
PA14_53380	2.97331	5.47209	330.841	1.17875e-11	6.38456e-09
phzB1	2.95482	7.05667	198.829	4.44168e-10	5.15862e-08
PA14_21810	-2.95074	2.25022	10.9906	0.00469281	0.0111261
lldP	2.94694	8.41801	92.5311	8.08269e-08	1.60522e-06
PA14_06430	2.93306	5.03782	50.1439	3.67404e-06	2.71538e-05
PA14_09370	-2.92171	4.18075	11.6231	0.00386828	0.00941505
PA14_63100	2.91421	6.78049	61.236	1.10601e-06	1.11499e-05
leuC	2.91163	8.53006	57.1826	1.67787e-06	1.50143e-05
PA14_36520	2.90881	8.55935	62.1666	1.00829e-06	1.0595e-05
PA14_61200	2.89903	12.185	179.606	9.05086e-10	8.11966e-08
algF	2.89616	3.00649	69.1874	5.19383e-07	6.17662e-06
phnM	2.89152	5.37285	125.279	1.07697e-08	3.88884e-07
PA14_54520	2.8908	5.66162	27.5918	9.64284e-05	0.000396494
PA14_06180	-2.88712	4.76648	62.2584	9.99195e-07	1.05706e-05
PA14_22370	2.88187	7.36925	102.886	4.0236e-08	9.49332e-07
PA14_10260	2.88148	7.47918	24.0463	0.00018927	0.000699113
pchE	-2.87699	7.04593	72.0381	4.03095e-07	5.13171e-06
PA14_47610	-2.87689	5.93796	123.901	1.16055e-08	4.06738e-07
PA14_68260	2.87588	9.90552	92.9957	7.82246e-08	1.56397e-06
pvdJ	2.87439	9.29828	56.1755	1.8678e-06	1.61749e-05
PA14_42090	2.87144	6.71268	78.8174	2.2785e-07	3.38735e-06
PA14_21000	2.86924	5.73668	132.935	7.20208e-09	2.97986e-07
phzB2	2.86399	10.0874	47.6063	4.9791e-06	3.37945e-05
PA14_55460	2.86065	1.63635	16.1899	0.0010985	0.00313901
PA14_65160	2.8358	9.12799	102.104	4.23196e-08	9.63359e-07
PA14_22380	2.83314	5.35936	49.818	3.81768e-06	2.78747e-05
PA14_58580	-2.82823	5.44334	156.46	2.35762e-09	1.45816e-07
dppD	2.82668	6.77816	161.801	1.86953e-09	1.2348e-07
PA14_42080	2.82082	7.52936	73.4377	3.57019e-07	4.69033e-06
PA14_49580	2.81222	5.12376	81.6328	1.81988e-07	2.86091e-06
PA14_61020	2.81216	5.18759	37.1532	2.02146e-05	0.000106395
plcN	2.8025	6.17914	44.3404	7.50452e-06	4.70652e-05
hpaA	2.79471	5.96741	100.209	4.78926e-08	1.04522e-06
PA14_43610	2.79121	8.75159	282.887	3.63457e-11	1.20304e-08
snr1	2.78978	8.26468	61.0326	1.12878e-06	1.13029e-05
PA14_55520	2.78684	1.67655	18.3309	0.000651478	0.00200906
PA14_68280	2.77143	7.28818	161.856	1.86515e-09	1.2348e-07
PA14_05750	2.77035	4.32005	47.1362	5.27474e-06	3.54305e-05
PA14_53970	2.76867	7.29864	93.7025	7.44461e-08	1.50309e-06
lasB	2.76463	13.2383	69.445	5.07441e-07	6.05879e-06
PA14_63740	2.7634	1.89628	8.98391	0.0089969	0.0194851
PA14_55380	2.75717	4.95664	51.5488	3.12106e-06	2.40622e-05
PA14_52250	-2.74101	5.19449	149.754	3.18818e-09	1.76341e-07
PA14_30050	2.73983	9.1021	102.229	4.19773e-08	9.63359e-07
phzA1	2.73163	5.81533	100.992	4.54948e-08	1.00392e-06
PA14_50770	2.72888	7.49259	111.388	2.37301e-08	6.66907e-07
PA14_46460	-2.72145	9.1019	138.191	5.52953e-09	2.47706e-07
PA14_58420	2.71937	9.60904	139.86	5.09403e-09	2.32159e-07
PA14_34020	2.71895	2.04448	25.9345	0.00013116	0.000511457
hcnC	2.71895	7.16255	163.817	1.71593e-09	1.18878e-07
PA14_18810	-2.71863	5.80997	197.908	4.5889e-10	5.15862e-08
atoB	2.71625	7.29375	70.3509	4.67851e-07	5.70087e-06
PA14_20960	2.71527	4.85274	61.6866	1.05742e-06	1.08746e-05
PA14_10640	2.71027	3.80186	48.6246	4.40079e-06	3.08469e-05
PA14_21530	2.69377	5.75841	84.5678	1.4498e-07	2.46798e-06
PA14_49610	2.69215	3.78837	71.7263	4.14254e-07	5.21802e-06
PA14_58720	-2.68334	8.86041	83.1845	1.6124e-07	2.64646e-06
PA14_55740	2.68136	5.21588	55.4128	2.02793e-06	1.7236e-05
pilA	-2.67533	12.9514	73.0015	3.70706e-07	4.79103e-06
hpcB	2.67381	4.70955	92.2795	8.22775e-08	1.62321e-06
PA14_71900	-2.67038	10.5581	108.292	2.86394e-08	7.51691e-07
PA14_04180	-2.66598	6.09968	78.5506	2.32837e-07	3.41542e-06
PA14_61340	2.66021	5.2266	42.4314	9.64243e-06	5.80886e-05
PA14_64700	-2.66001	3.87811	12.405	0.00306793	0.00768015
PA14_34640	-2.65275	5.65008	201.598	4.03028e-10	5.15862e-08
PA14_05740	2.64879	4.41445	47.8583	4.82835e-06	3.30094e-05
PA14_29375	-2.64868	4.81113	55.7983	1.94514e-06	1.67716e-05
hcpC	-2.64238	4.24573	2.68307	0.122157	0.182501
pstC	-2.63292	7.95788	64.3689	8.13661e-07	8.97739e-06
PA14_55450	2.62228	4.302	43.6983	8.15709e-06	5.04651e-05
ibpA	-2.61439	9.84661	126.691	9.98298e-09	3.76746e-07
citA	2.60761	6.77293	61.9218	1.03302e-06	1.07788e-05
pelC	2.58648	2.75333	13.9802	0.00196532	0.00522741
PA14_68900	-2.58523	6.45021	149.497	3.22611e-09	1.76341e-07
nirN	-2.58202	6.30206	137.478	5.72809e-09	2.53635e-07
cyp23	2.58185	5.96383	189.515	6.21845e-10	6.17493e-08
PA14_36650	2.58095	7.3173	82.5241	1.69723e-07	2.74786e-06
PA14_55730	-2.58008	4.68777	105.893	3.32398e-08	8.39163e-07
dppC	2.57996	6.52223	89.5687	9.99231e-08	1.90815e-06
glcF	-2.57832	3.16146	29.1756	7.26953e-05	0.000314538
PA14_06800	-2.57412	2.55153	18.216	0.000669382	0.00204837
PA14_36630	2.55532	8.93549	70.7951	4.49727e-07	5.56461e-06
PA14_61950	-2.55285	5.82474	117.513	1.65794e-08	5.17173e-07
PA14_24870	-2.55212	0.217248	3.11122	0.0980418	0.151173
pchR	-2.55154	5.65982	91.8348	8.49127e-08	1.66967e-06
PA14_48570	2.55118	6.68435	105.29	3.45231e-08	8.57035e-07
PA14_60090	-2.54309	7.89099	74.7381	3.19496e-07	4.31646e-06
PA14_13960	-2.54023	3.38191	27.2201	0.000103203	0.000419819
PA14_48600	2.53907	4.98035	58.4227	1.47335e-06	1.3716e-05
PA14_10210	-2.53784	4.65105	40.0216	1.33974e-05	7.63845e-05
metK	2.53768	9.49567	137.412	5.74702e-09	2.53635e-07
pqqF	2.53692	4.16299	102.088	4.23632e-08	9.63359e-07
phnF	2.53146	3.13128	30.3935	5.8915e-05	0.000263525
PA14_36530	2.52823	8.21067	50.055	3.71259e-06	2.73419e-05
ahpC	2.52649	11.6275	49.3262	4.0467e-06	2.91186e-05
fahA	2.51895	7.3392	155.931	2.41342e-09	1.45816e-07
PA14_68130	2.51324	6.53294	42.4215	9.65507e-06	5.81059e-05
glcB	2.51174	9.10787	177.655	9.76719e-10	8.19618e-08
lipC	2.50518	5.06319	38.9649	1.55488e-05	8.60164e-05
PA14_19930	-2.50347	4.37717	106.415	3.21714e-08	8.19133e-07
fadA	2.48901	9.98304	74.0633	3.38378e-07	4.50012e-06
PA14_39860	2.48801	6.00679	59.9745	1.25609e-06	1.2149e-05
pilC	-2.48535	9.4916	168.335	1.42087e-09	1.03715e-07
PA14_29470	2.47912	6.44748	80.4605	1.99679e-07	3.05349e-06
norC	-2.47552	9.37539	192.922	5.48861e-10	5.63813e-08
gnyB	2.4754	8.37758	61.1365	1.11708e-06	1.12425e-05
PA14_54580	2.46494	4.52426	88.3378	1.09324e-07	2.02913e-06
PA14_72900	-2.45873	7.45648	170.606	1.29458e-09	1.01438e-07
PA14_48140	2.4568	8.11673	70.6975	4.53641e-07	5.59584e-06
PA14_13210	-2.45086	4.30326	103.627	3.83671e-08	9.18037e-07
tonB2	-2.43071	2.48289	16.2329	0.00108664	0.00311778
PA14_44570	2.41573	5.11398	107.003	3.10146e-08	8.03412e-07
fepC	-2.41325	3.64293	29.6545	6.68815e-05	0.000292355
PA14_33110	2.40992	2.60405	47.8107	4.85638e-06	3.31056e-05
dhT	2.40488	6.76904	149.094	3.28648e-09	1.76404e-07
PA14_05890	-2.40388	4.64415	59.382	1.33445e-06	1.27007e-05
PA14_12450	2.40356	7.18634	305.708	2.08251e-11	8.86257e-09
phnJ	2.40116	4.81516	102.467	4.13373e-08	9.62061e-07
PA14_50760	2.39651	6.78093	44.5886	7.26835e-06	4.6069e-05
PA14_01750	2.39279	6.34129	216.687	2.42331e-10	4.04077e-08
PA14_25960	2.39135	5.76715	83.1188	1.62061e-07	2.65264e-06
PA14_44950	2.38056	6.77568	110.112	2.56273e-08	6.94034e-07
gabT	2.38053	8.66823	83.4256	1.58262e-07	2.60477e-06
PA14_09990	-2.37918	2.11218	15.4812	0.00131716	0.0036826
PA14_59610	-2.37916	7.95636	145.52	3.88233e-09	1.91165e-07
PA14_26140	-2.37423	5.2625	93.6268	7.48409e-08	1.50309e-06
PA14_14710	-2.3713	8.44432	132.009	7.55281e-09	3.08217e-07
PA14_55790	-2.36643	6.44471	217.022	2.39699e-10	4.04077e-08
PA14_10650	2.3624	3.33009	26.2588	0.000123374	0.000485831
tnpS	-2.35723	8.34419	348.192	8.14857e-12	5.39435e-09
fadB	2.35133	11.1094	49.2844	4.06687e-06	2.92285e-05
PA14_00520	-2.35028	3.3969	11.4467	0.00408027	0.00985017
PA14_48750	2.34744	3.85943	80.0228	2.06778e-07	3.13314e-06
PA14_01340	2.34238	5.21499	104.712	3.58089e-08	8.8161e-07
rhlB	2.33925	9.09851	52.8453	2.69318e-06	2.14518e-05
PA14_11120	-2.33852	6.69906	177.685	9.7554e-10	8.19618e-08
PA14_69750	-2.33312	6.37996	391.275	3.49928e-12	3.47478e-09
phzM	2.33031	8.15835	128.162	9.2321e-09	3.61874e-07
PA14_13940	-2.32767	7.99299	122.19	1.2748e-08	4.25262e-07
PA14_67180	-2.32717	5.97751	84.3866	1.47e-07	2.48507e-06
pfeS	-2.32549	5.36453	70.4643	4.63148e-07	5.6978e-06
PA14_01350	2.32538	4.13981	68.3891	5.58459e-07	6.56272e-06
astD	2.3172	6.60339	74.2002	3.34448e-07	4.47784e-06
dppF	2.31244	7.12868	150.239	3.11817e-09	1.7577e-07
PA14_05600	2.31083	5.77026	105.407	3.42698e-08	8.54307e-07
nirE	-2.3094	5.44894	78.8102	2.27984e-07	3.38735e-06
lipA	2.30035	6.57645	37.8265	1.83164e-05	9.87072e-05
PA14_20530	-2.29917	7.13249	76.783	2.6918e-07	3.75591e-06
aroQ2	-2.29865	1.83665	7.68936	0.0141815	0.0288571
pchD	-2.29827	6.59147	103.784	3.79839e-08	9.14695e-07
PA14_64610	-2.29704	3.18031	34.6992	2.92902e-05	0.000145547
PA14_19920	-2.2926	6.13298	59.9222	1.26279e-06	1.21941e-05
PA14_45930	2.29114	6.71427	150.948	3.0187e-09	1.74615e-07
PA14_68120	2.28756	6.45255	47.7058	4.91892e-06	3.34554e-05
rcsB	-2.28194	5.89689	122.857	1.22883e-08	4.18165e-07
PA14_68290	2.2758	7.74124	101.123	4.5106e-08	1.00277e-06
prpC	2.27543	7.78996	78.5353	2.33127e-07	3.41542e-06
PA14_13090	2.27252	6.53834	69.009	5.27836e-07	6.25218e-06
glpM	2.26971	6.07532	113.186	2.13212e-08	6.22704e-07
pscN	-2.26525	2.35906	6.73441	0.0202588	0.0389612
cyaY	-2.25952	6.13289	140.715	4.8862e-09	2.27437e-07
htpX	-2.25599	8.14182	253.956	7.85797e-11	2.03556e-08
PA14_20480	-2.2548	5.70626	22.8695	0.000240158	0.000857832
PA14_31300	-2.25345	6.351	170.298	1.31097e-09	1.01438e-07
pvdL	2.24769	8.59506	27.6024	9.62435e-05	0.000396008
PA14_29100	2.23882	4.16642	78.02	2.43128e-07	3.52446e-06
PA14_26830	2.23722	4.05581	62.8354	9.44102e-07	1.01243e-05
PA14_11810	2.23175	9.4539	167.473	1.47242e-09	1.04437e-07
PA14_10950	2.23162	2.41749	30.7879	5.51077e-05	0.000249492
PA14_40010	2.23121	5.48949	109.562	2.64986e-08	7.08408e-07
PA14_72690	2.22401	6.84663	100.38	4.73574e-08	1.04116e-06
PA14_33070	2.22378	4.12244	45.5046	6.46677e-06	4.20622e-05
PA14_03610	2.22251	6.90569	102.557	4.10976e-08	9.60234e-07
PA14_08160	2.22083	3.81839	27.883	9.14724e-05	0.000379436
PA14_55240	2.21993	3.40999	37.2209	2.00141e-05	0.000105432
PA14_33610	2.21853	9.38477	28.3864	8.35724e-05	0.000352887
pra	2.21625	8.51346	30.3101	5.97581e-05	0.000266297
ilvA2	2.2133	5.00686	40.6374	1.23003e-05	7.12201e-05
PA14_08590	-2.21327	0.649867	5.09212	0.0393369	0.0694427
PA14_47430	2.20913	4.99019	54.0238	2.3612e-06	1.93996e-05
nirJ	-2.20636	6.30127	155.615	2.44739e-09	1.45816e-07
pilB	-2.20185	9.05497	208.663	3.16248e-10	4.71052e-08
phoA	2.19683	4.8415	25.8819	0.000132475	0.000515537
PA14_36490	2.19092	5.53997	53.9119	2.39064e-06	1.95383e-05
PA14_46780	2.18834	5.08495	27.2188	0.000103228	0.000419819
PA14_39570	2.18606	3.15751	22.8346	0.000241891	0.000862468
PA14_18160	2.18566	4.98695	73.906	3.42959e-07	4.54078e-06
PA14_06710	-2.18564	5.26429	112.697	2.19483e-08	6.31728e-07
PA14_03410	-2.18507	1.38608	5.51104	0.0329872	0.0596474
sahH	2.18404	8.97537	102.225	4.1987e-08	9.63359e-07
PA14_62360	-2.18199	3.72985	35.0809	2.76147e-05	0.000138259
PA14_55800	-2.18062	5.21482	64.4087	8.10556e-07	8.95973e-06
PA14_58440	2.17899	8.19736	77.0039	2.64305e-07	3.73188e-06
pelD	2.17568	3.35554	37.0182	2.06217e-05	0.000107775
aprD	2.17278	6.04577	98.3841	5.40601e-08	1.14623e-06
ada	2.17237	5.35789	58.371	1.48129e-06	1.37408e-05
PA14_49650	2.17161	6.87336	110.648	2.48111e-08	6.8122e-07
PA14_24120	-2.17157	2.31929	4.67223	0.0471764	0.0810254
aroF	2.16992	4.08806	54.9261	2.13823e-06	1.79178e-05
PA14_10370	2.16953	5.82883	47.8928	4.80808e-06	3.30029e-05
pqqB	2.16846	5.57546	113.102	2.14278e-08	6.22765e-07
PA14_65920	2.16439	2.91602	55.3089	2.05092e-06	1.73818e-05
PA14_34170	-2.16397	4.20898	80.1111	2.05322e-07	3.12867e-06
PA14_15770	-2.1616	6.30542	197.381	4.67561e-10	5.15876e-08
PA14_36620	2.15384	5.44062	46.8784	5.44529e-06	3.64119e-05
sucC	2.15188	9.76852	130.369	8.22224e-09	3.28779e-07
PA14_33460	2.14764	4.55297	21.8647	0.000296155	0.0010223
PA14_47420	2.14601	4.48143	45.8465	6.19359e-06	4.06403e-05
PA14_66510	-2.14496	4.01924	69.2312	5.17329e-07	6.16449e-06
ohr	-2.14091	5.15812	122.972	1.22108e-08	4.18165e-07
PA14_53790	2.1392	5.78948	142.815	4.41503e-09	2.10438e-07
PA14_36375	2.13266	5.5265	57.868	1.56112e-06	1.41786e-05
PA14_44520	-2.13188	3.16156	9.31798	0.00803824	0.0176592
PA14_51950	-2.12974	6.74091	45.2262	6.69928e-06	4.3104e-05
PA14_58390	2.12877	11.747	90.2219	9.53084e-08	1.83177e-06
PA14_31960	-2.12781	4.82501	37.9032	1.81133e-05	9.793e-05
aguB	-2.12532	4.39465	46.3031	5.84898e-06	3.87633e-05
PA14_36660	2.12532	7.00473	62.8278	9.448e-07	1.01243e-05
PA14_09350	-2.12457	3.73224	53.6313	2.46631e-06	2.00195e-05
PA14_11730	-2.12215	3.93302	58.2399	1.50165e-06	1.37576e-05
grpE	-2.11416	7.81233	85.4364	1.35722e-07	2.35572e-06
sndH	2.11135	7.01345	80.7498	1.95139e-07	3.00423e-06
phnG	2.1077	2.88287	27.865	9.17707e-05	0.000379497
PA14_72210	2.10714	5.86174	26.4168	0.000119771	0.000474046
PA14_28350	2.10679	6.56822	55.3831	2.03447e-06	1.72669e-05
fdnH	2.10484	7.92723	146.454	3.71555e-09	1.86027e-07
PA14_38310	2.10278	3.12478	19.1946	0.000533054	0.00169293
PA14_57600	2.09923	7.01219	126.53	1.00692e-08	3.76746e-07
PA14_12300	-2.09284	7.48016	19.2537	0.000525881	0.00167104
PA14_19730	2.092	5.55523	78.7137	2.29774e-07	3.39003e-06
PA14_40610	-2.09022	1.01279	5.55892	0.0323404	0.0585666
PA14_03620	2.08536	3.57807	28.5227	8.15682e-05	0.000346403
PA14_55510	2.08532	3.44223	75.1502	3.08553e-07	4.22612e-06
nirQ	-2.08429	7.69741	157.978	2.20565e-09	1.398e-07
PA14_07860	2.08247	8.62393	67.7106	5.94305e-07	6.88885e-06
antB	2.0819	2.58325	19.6437	0.00048127	0.00154327
lpdG	2.08166	9.72999	172.415	1.20309e-09	9.55731e-08
PA14_36605	2.07924	7.97073	51.0528	3.30472e-06	2.52107e-05
PA14_27620	-2.07676	3.43365	18.7578	0.000589569	0.00184779
PA14_10220	2.0746	5.32608	27.3632	0.000100532	0.000411099
PA14_03310	-2.07073	7.2188	178.624	9.40343e-10	8.11966e-08
PA14_34670	2.0699	6.07718	54.0254	2.36078e-06	1.93996e-05
PA14_59230	-2.06782	5.42094	38.987	1.54998e-05	8.5905e-05
PA14_19710	2.06744	5.75665	40.8391	1.19635e-05	6.96081e-05
PA14_24710	-2.06713	4.16841	65.7177	7.15625e-07	8.10189e-06
PA14_39260	2.06642	1.21263	15.4482	0.00132849	0.00370732
PA14_59220	-2.06198	7.2673	155.693	2.43894e-09	1.45816e-07
nrdA	2.06193	9.41854	124.816	1.10425e-08	3.96333e-07
pchC	-2.06131	4.40802	11.3578	0.00419212	0.0100753
PA14_55810	-2.05537	9.86085	245.059	1.01297e-10	2.5147e-08
hcpB	-2.05498	5.46484	31.4403	4.94059e-05	0.000227305
fdhE	2.05481	5.28076	68.6699	5.44343e-07	6.41102e-06
PA14_59590	-2.0535	6.75765	124.234	1.13969e-08	4.04184e-07
PA14_03166	-2.0528	7.75384	222.411	2.01542e-10	3.8735e-08
PA14_36590	2.04516	7.34239	39.1503	1.51445e-05	8.42492e-05
PA14_54080	-2.0412	7.48653	215.508	2.51855e-10	4.05555e-08
PA14_55490	2.03937	2.96754	20.4651	0.000400655	0.00132249
PA14_33150	2.03715	5.53784	32.5967	4.08667e-05	0.000194011
exsA	-2.0365	5.75072	124.431	1.12755e-08	4.02273e-07
PA14_36390	2.03623	4.51697	50.187	3.65549e-06	2.70552e-05
PA14_19910	-2.03476	6.39596	66.6286	6.56995e-07	7.4988e-06
thiC	2.03176	7.41918	95.5132	6.56737e-08	1.35862e-06
amaB	2.03041	6.23321	57.7444	1.58147e-06	1.42897e-05
PA14_71100	-2.01919	4.60135	5.53725	0.0326312	0.0590395
PA14_51940	-2.0184	7.83404	59.0387	1.38238e-06	1.29909e-05
gnyL	2.01617	7.26864	36.5258	2.21863e-05	0.000115044
PA14_47640	-2.01269	3.01158	48.517	4.45817e-06	3.11028e-05
orfL	-2.01221	9.87115	35.7139	2.507e-05	0.000127773
PA14_37220	2.00741	5.08469	88.5726	1.07456e-07	2.01963e-06
pvdD	2.00392	9.27943	48.5782	4.42541e-06	3.09212e-05
sucD	2.00248	9.81612	126.74	9.957e-09	3.76746e-07
PA14_43550	2.00238	5.76466	110.467	2.50829e-08	6.85522e-07
PA14_06390	-2.00138	5.93218	147.237	3.58203e-09	1.83981e-07
glgB	1.99892	7.69492	45.645	6.35295e-06	4.15487e-05
PA14_41790	1.99485	7.36228	31.4661	4.91944e-05	0.000226682
PA14_55570	1.98913	5.88794	49.0374	4.1884e-06	2.98142e-05
PA14_03420	-1.9869	6.84746	39.8243	1.37721e-05	7.7924e-05
uvrC	-1.98638	7.09071	56.9667	1.71667e-06	1.51975e-05
dtd	-1.98638	8.26227	112.886	2.17032e-08	6.27707e-07
PA14_59620	-1.98424	8.66189	129.295	8.69693e-09	3.43154e-07
PA14_55530	1.97723	4.34475	24.8298	0.000162191	0.000614718
cyoC	1.96924	4.47945	39.9825	1.34709e-05	7.652e-05
PA14_22080	-1.96924	7.37684	111.632	2.33856e-08	6.63482e-07
pcrG	-1.96901	1.19482	3.10055	0.0985694	0.15179
PA14_64560	1.96862	2.666	14.2969	0.00180283	0.00483842
PA14_24570	-1.96749	2.07692	5.97479	0.0273	0.0503883
fumC	-1.96205	7.55497	179.189	9.19889e-10	8.11966e-08
pcrV	-1.95672	3.86717	35.253	2.68947e-05	0.000135337
PA14_09630	1.95582	6.63197	18.563	0.000616951	0.00192048
PA14_34680	1.95207	6.78412	47.8642	4.82489e-06	3.30094e-05
PA14_19690	-1.95072	3.417	18.1085	0.000686637	0.00209257
PA14_26160	-1.94969	2.51854	26.8568	0.000110349	0.000442735
PA14_27600	-1.94959	0.971268	2.98386	0.104562	0.159861
nrdB	1.94868	8.67906	116.695	1.73758e-08	5.364e-07
PA14_59170	-1.94653	6.56199	149.153	3.27763e-09	1.76404e-07
aroP2	1.9371	6.81018	161.499	1.89387e-09	1.2348e-07
PA14_36960	1.93577	5.27594	58.3604	1.48293e-06	1.37408e-05
PA14_31250	-1.93513	1.18488	3.26291	0.0909019	0.141704
PA14_06170	-1.9348	4.23958	42.3781	9.71128e-06	5.83264e-05
PA14_72890	-1.93417	7.17477	216.457	2.44156e-10	4.04077e-08
PA14_53300	1.93042	5.69741	40.7978	1.20317e-05	6.9868e-05
PA14_22100	-1.92959	3.69166	24.6716	0.000167285	0.000628428
hcnA	1.92899	5.96801	77.8229	2.4708e-07	3.56441e-06
nosR	-1.92881	9.00765	44.155	7.68673e-06	4.79054e-05
PA14_13970	-1.92681	4.61259	24.2652	0.000181221	0.000673559
PA14_06640	1.92644	7.10492	57.7501	1.58053e-06	1.42897e-05
mdcE	1.92599	3.69602	15.8401	0.00120079	0.00340033
rbsA	1.92584	7.54077	199.195	4.38458e-10	5.15862e-08
PA14_32670	1.92435	2.11951	14.3148	0.00179412	0.00482154
PA14_48730	1.92364	5.25469	76.0858	2.85251e-07	3.9616e-06
PA14_53870	1.923	1.50677	13.3393	0.00390979	0.00949633
PA14_13330	1.92164	6.00161	57.1471	1.68418e-06	1.5044e-05
cobN_1	1.9212	5.71534	104.021	3.74145e-08	9.0986e-07
oprM	1.91939	8.45214	162.234	1.83524e-09	1.2348e-07
PA14_14080	1.91888	5.06436	96.2187	6.25774e-08	1.30362e-06
orfM	-1.91712	9.47661	33.8588	3.34014e-05	0.000163387
algJ	1.91623	2.15636	10.6109	0.00528368	0.0123066
PA14_44510	-1.91617	5.4434	43.3576	8.52925e-06	5.2335e-05
PA14_52960	-1.91504	4.91416	48.8598	4.2783e-06	3.02374e-05
fimU	-1.91455	5.75388	87.3391	1.17691e-07	2.14179e-06
PA14_55440	1.91128	3.85753	30.655	5.63585e-05	0.000253613
etfA	1.9108	9.41412	123.918	1.15952e-08	4.06738e-07
PA14_02380	1.9	3.41109	36.4724	2.23639e-05	0.000115764
pilG	-1.89906	8.90316	136.791	5.92741e-09	2.5581e-07
PA14_00970	-1.89106	4.3627	78.369	2.36303e-07	3.44225e-06
nirF	-1.89083	6.72219	43.3051	8.58833e-06	5.24569e-05
PA14_66100	-1.89075	6.64537	167.667	1.46065e-09	1.04437e-07
PA14_64550	1.88896	1.21582	3.18362	0.0945536	0.146553
metE	1.88828	6.25877	18.3753	0.000644704	0.0019892
PA14_37760	1.88787	6.03557	86.584	1.24501e-07	2.22756e-06
PA14_46770	1.8871	5.55218	31.2635	5.08817e-05	0.000233195
PA14_16740	1.88646	4.80456	47.7072	4.91806e-06	3.34554e-05
PA14_03170	-1.88457	5.68661	101.291	4.46135e-08	1.00258e-06
PA14_19990	-1.88422	3.25622	12.4252	0.00304988	0.00763816
PA14_41340	1.88211	1.0575	2.58271	0.128814	0.191104
PA14_48470	-1.8811	1.13219	4.07421	0.0617339	0.101774
PA14_34820	1.8784	4.84579	73.6679	3.50028e-07	4.62409e-06
PA14_68150	-1.878	2.31387	9.48728	0.00759741	0.0168085
aqpZ	1.87652	4.49521	32.8793	3.90437e-05	0.000186546
PA14_63120	1.87456	4.77546	17.1811	0.000858483	0.00254977
antC	1.87368	2.43888	4.61519	0.0483765	0.0828001
PA14_39810	-1.87366	3.32872	8.86799	0.0093597	0.0201463
PA14_15570	-1.87273	5.79318	86.147	1.28645e-07	2.28797e-06
PA14_01250	1.8714	6.60527	23.8437	0.000197085	0.00072305
PA14_51660	-1.87083	2.72763	9.42248	0.00776279	0.0171299
opmD	1.86971	6.93475	101.014	4.54298e-08	1.00392e-06
PA14_54110	-1.86854	1.10399	4.40444	0.0531318	0.08955
PA14_69510	-1.8663	7.80311	207.081	3.33667e-10	4.84876e-08
pchG	-1.86611	5.87013	3.30822	0.0888911	0.139043
PA14_19650	1.86316	3.87106	50.5275	3.51277e-06	2.64256e-05
PA14_36580	1.86085	7.38974	61.8138	1.04414e-06	1.08746e-05
PA14_30410	-1.85928	9.1314	106.784	3.14398e-08	8.10901e-07
PA14_61500	-1.85813	7.28038	41.4031	1.10757e-05	6.51422e-05
cpo	1.85698	6.45326	56.8905	1.73061e-06	1.52755e-05
PA14_18820	-1.85665	3.15223	52.9907	2.64948e-06	2.12458e-05
hslV	-1.8527	7.67481	55.7027	1.96531e-06	1.68966e-05
PA14_55820	-1.8482	7.57411	181.377	8.45172e-10	7.74698e-08
PA14_21480	-1.8482	3.83826	38.3702	1.69305e-05	9.26279e-05
pscB	-1.84815	1.41338	7.34232	0.0161084	0.0321304
PA14_69770	-1.8442	9.25671	64.0157	8.41789e-07	9.21945e-06
rbsC	1.84174	6.25835	68.9152	5.32349e-07	6.29312e-06
PA14_55480	1.83946	2.66622	21.8407	0.000297665	0.00102395
PA14_25470	-1.83362	5.13496	90.1569	9.57568e-08	1.83447e-06
ribB	1.83116	6.70424	90.3163	9.46615e-08	1.82522e-06
PA14_47920	1.82812	3.27674	23.0227	0.00023273	0.000836815
PA14_00130	-1.82804	5.39917	66.1431	6.87536e-07	7.83239e-06
PA14_25450	-1.82522	6.99389	33.11	3.76235e-05	0.000180629
PA14_05910	-1.82367	4.87922	42.6328	9.38704e-06	5.68374e-05
PA14_28850	-1.82327	5.99628	194.843	5.1201e-10	5.44742e-08
cobH	1.82302	2.3219	14.0877	0.00190838	0.00509187
PA14_11240	1.82104	4.75238	33.0277	3.81231e-05	0.000182586
sucB	1.8196	8.87294	172.599	1.19417e-09	9.55731e-08
PA14_08180	1.81943	2.56724	16.3946	0.00104327	0.00301008
PA14_34330	1.81922	6.09732	48.8607	4.27783e-06	3.02374e-05
PA14_08110	1.81817	1.44884	9.65451	0.0071889	0.0160177
PA14_31840	1.81787	5.04387	98.0596	5.52487e-08	1.16728e-06
PA14_02610	1.81655	2.79844	15.7876	0.00121707	0.00343826
PA14_19900	-1.81553	6.23765	46.4149	5.76794e-06	3.83542e-05
PA14_34830	1.81467	4.18665	30.0518	6.24562e-05	0.000276254
rhlC	1.81392	5.5775	101.215	4.48353e-08	1.00258e-06
PA14_40170	-1.81248	3.83578	60.9333	1.14007e-06	1.13398e-05
PA14_04790	1.81181	6.08401	85.7797	1.32249e-07	2.31747e-06
glcC	-1.81155	6.40205	93.8822	7.35182e-08	1.48987e-06
PA14_53980	1.80763	4.93906	44.2796	7.56375e-06	4.73868e-05
PA14_49890	-1.80458	5.78085	113.722	2.06578e-08	6.15395e-07
PA14_60020	-1.80315	9.11397	51.5465	3.12187e-06	2.40622e-05
PA14_66460	1.80297	7.9913	64.496	8.03799e-07	8.90385e-06
PA14_38740	1.80176	5.25151	67.9888	5.79301e-07	6.75435e-06
PA14_13650	1.80071	3.18854	49.9575	3.75542e-06	2.7601e-05
PA14_48640	1.80065	3.18913	43.3142	8.57805e-06	5.24569e-05
PA14_04350	-1.79876	3.78997	30.6554	5.63545e-05	0.000253613
PA14_09930	1.79769	5.73331	70.3816	4.66573e-07	5.70087e-06
metH	1.79727	8.27306	140.936	4.83405e-09	2.26782e-07
PA14_62690	-1.79663	11.4516	45.3003	6.63646e-06	4.28386e-05
PA14_66020	1.79623	5.49151	46.3861	5.78869e-06	3.84493e-05
PA14_05660	-1.79545	7.50504	79.254	2.19948e-07	3.30921e-06
PA14_59600	-1.79468	5.33551	72.1995	3.97453e-07	5.0816e-06
orfK	-1.79416	10.1649	37.1268	2.02934e-05	0.000106621
PA14_12470	1.79364	4.47773	60.6522	1.17278e-06	1.15495e-05
ccpR	-1.79272	7.04719	89.2732	1.02093e-07	1.93102e-06
livM	1.79023	5.99839	127.049	9.79387e-09	3.76729e-07
PA14_13500	1.78993	4.51685	84.1792	1.49352e-07	2.49955e-06
PA14_61220	1.78278	4.02876	24.7971	0.000163229	0.00061669
PA14_67190	-1.78105	5.48247	40.1138	1.32264e-05	7.55538e-05
orfJ	-1.78034	8.06464	20.2521	0.000419978	0.00137636
PA14_04780	1.77916	6.85795	82.3112	1.72566e-07	2.76906e-06
PA14_16800	1.77905	5.90027	52.9333	2.66665e-06	2.1326e-05
PA14_15580	-1.77622	9.04357	125.969	1.03767e-08	3.81631e-07
cysN	-1.77603	8.15733	40.6013	1.23618e-05	7.15065e-05
PA14_39850	1.77433	2.03879	9.06601	0.00874971	0.0189981
pchB	-1.76753	4.66899	38.9685	1.55409e-05	8.60164e-05
PA14_07110	1.7665	8.70303	64.9741	7.67907e-07	8.59998e-06
pscO	-1.76535	1.17201	2.77946	0.116153	0.17491
hpcD	1.76502	3.33494	26.2632	0.000123271	0.000485747
PA14_25430	-1.76492	7.68203	35.3532	2.64856e-05	0.00013373
orfH	-1.76478	9.97685	38.4876	1.6647e-05	9.12448e-05
PA14_23420	-1.7645	11.3223	27.3365	0.000101026	0.000412268
PA14_27740	1.76443	5.06321	50.8671	3.37663e-06	2.56934e-05
rpoC	1.76425	12.2085	48.6357	4.39493e-06	3.08469e-05
PA14_34840	1.76382	6.8666	84.5168	1.45546e-07	2.47054e-06
katE	1.76244	9.22733	59.3029	1.34533e-06	1.27838e-05
PA14_49900	-1.76226	6.11285	40.235	1.30052e-05	7.4456e-05
soxG	1.76159	1.99128	16.2274	0.00108815	0.00311778
pchF	-1.76054	7.14261	26.334	0.000121643	0.000480285
PA14_69030	-1.75523	6.94272	199.741	4.30116e-10	5.15862e-08
PA14_53600	-1.75307	6.45022	29.418	6.96839e-05	0.000302827
PA14_21470	-1.75242	3.32582	27.183	0.000103908	0.000422005
PA14_49800	-1.7515	4.90617	47.9048	4.80107e-06	3.29928e-05
PA14_11760	1.74979	5.27149	74.1539	3.3577e-07	4.48547e-06
PA14_04810	1.74883	7.60398	65.3664	7.39801e-07	8.31648e-06
PA14_70650	-1.74873	2.60317	33.77	3.3873e-05	0.000165481
PA14_36730	1.74866	8.30224	46.2429	5.89316e-06	3.89694e-05
PA14_37460	1.74855	1.18651	5.15441	0.0383082	0.0679084
morB	-1.74174	4.01875	39.115	1.52206e-05	8.45148e-05
PA14_68530	1.74127	4.36461	33.085	3.77745e-05	0.000181062
PA14_07440	-1.74109	3.69263	42.8338	9.13974e-06	5.54299e-05
PA14_21160	1.74044	4.45092	59.6321	1.30071e-06	1.24393e-05
hpcC	1.73982	4.94693	27.8727	9.16428e-05	0.000379436
PA14_53590	-1.73476	8.4278	47.9962	4.74804e-06	3.27038e-05
PA14_55500	1.73432	2.09898	11.4809	0.00403819	0.00977234
PA14_18640	1.73413	5.47517	150.176	3.12716e-09	1.7577e-07
nirS	-1.73344	10.4114	108.595	2.81101e-08	7.44356e-07
PA14_23090	-1.73343	5.59594	103.747	3.80739e-08	9.14695e-07
cupB2	-1.73315	2.73431	22.7036	0.000248514	0.000880288
PA14_32310	-1.73111	5.64263	54.4205	2.26007e-06	1.87803e-05
PA14_03320	-1.73099	7.01848	110.722	2.47009e-08	6.8122e-07
PA14_06620	1.72846	5.81366	117.803	1.63065e-08	5.14042e-07
leuA	1.72759	9.06866	22.3857	0.000265461	0.000931457
PA14_63110	1.7264	5.35643	13.0502	0.00254783	0.00655723
PA14_19490	-1.72534	9.66966	22.9124	0.000238053	0.00085189
PA14_36740	1.72463	7.78588	62.6632	9.60172e-07	1.02338e-05
PA14_43540	1.72335	4.74017	72.832	3.76183e-07	4.8513e-06
PA14_08510	-1.72005	7.44274	117.898	1.62184e-08	5.13986e-07
PA14_04050	-1.71909	6.52775	148.132	3.43594e-09	1.79029e-07
phnN	1.71704	5.22011	110.883	2.44611e-08	6.8122e-07
PA14_51600	1.71694	6.62276	49.5581	3.93681e-06	2.85347e-05
PA14_18080	-1.71584	6.43333	155.913	2.41534e-09	1.45816e-07
PA14_38880	1.71564	0.219737	1.99225	0.178449	0.251347
PA14_23430	-1.71518	10.319	21.2663	0.000336492	0.00113845
PA14_50810	1.71477	8.86849	113.249	2.12422e-08	6.22704e-07
PA14_46920	1.71355	5.96903	63.1814	9.12716e-07	9.85138e-06
PA14_46830	1.71296	5.29063	25.6068	0.000139601	0.000539743
PA14_43040	-1.71265	6.75249	52.7584	2.71968e-06	2.15763e-05
PA14_21870	-1.71262	6.39666	85.5262	1.34804e-07	2.35531e-06
PA14_62670	-1.71147	5.54638	23.5616	0.00020858	0.00075961
pdxA_2	1.71101	2.7265	19.7045	0.000474707	0.00152716
bioB	1.70961	8.23276	90.7532	9.17325e-08	1.78027e-06
PA14_72660	1.70825	6.32893	67.0126	6.33924e-07	7.29135e-06
PA14_50870	1.70759	4.57911	43.1022	8.82101e-06	5.35735e-05
PA14_16820	1.70703	7.38881	62.0261	1.0224e-06	1.07006e-05
prpL	1.70618	9.4647	18.8902	0.000571752	0.00179857
PA14_59190	-1.70556	8.42888	107.037	3.09479e-08	8.03412e-07
PA14_39480	-1.70133	9.32303	89.3234	1.01721e-07	1.9301e-06
PA14_51490	-1.70054	6.1096	58.2151	1.50554e-06	1.37576e-05
PA14_03160	-1.70031	8.33472	61.2626	1.10308e-06	1.11392e-05
PA14_40200	1.70006	7.44667	57.086	1.69511e-06	1.50532e-05
PA14_37370	1.6986	0.732725	5.66466	0.0309633	0.0563984
pscF	-1.69845	1.5936	4.47074	0.0515791	0.0873531
PA14_21450	-1.69461	5.45473	56.381	1.82715e-06	1.59621e-05
PA14_40040	1.69302	5.77005	61.4439	1.08328e-06	1.10101e-05
PA14_18070	-1.69241	4.02047	16.9217	0.00091497	0.00269737
mvaT	-1.68928	11.2971	88.8396	1.05375e-07	1.98679e-06
ribC	1.68925	6.32849	60.0293	1.2491e-06	1.21059e-05
phzA2	1.68679	9.38471	26.9044	0.000109383	0.000439748
PA14_59890	-1.68575	3.60025	52.9617	2.65814e-06	2.12865e-05
wbpZ	-1.68385	8.56583	156.665	2.33641e-09	1.45816e-07
rmlD	1.68338	6.9609	119.365	1.49244e-08	4.85901e-07
phoR	-1.68329	6.029	57.3451	1.64933e-06	1.48216e-05
fdnI	1.68312	6.5423	118.6	1.55837e-08	4.96528e-07
PA14_03340	-1.68261	5.97085	195.706	4.96385e-10	5.37721e-08
PA14_16630	1.67975	11.0748	32.7226	4.00431e-05	0.000190556
exbB1	-1.67965	4.2951	38.0911	1.76265e-05	9.57328e-05
PA14_71760	1.67879	4.53965	30.75	5.54606e-05	0.000250511
PA14_58600	-1.67849	4.96247	42.0934	1.00889e-05	6.03809e-05
sseA	1.67838	5.99635	117.581	1.65144e-08	5.17173e-07
pilD	-1.67821	6.59793	74.76	3.18904e-07	4.31646e-06
PA14_32480	-1.67772	5.70487	49.5697	3.93139e-06	2.85347e-05
infA	-1.67682	7.66568	85.4257	1.35832e-07	2.35572e-06
PA14_47660	1.67617	1.9729	15.6945	0.00124655	0.00351822
spuA	-1.67543	7.86757	43.3008	8.59314e-06	5.24569e-05
PA14_49040	-1.67508	5.07193	42.5356	9.50931e-06	5.74609e-05
PA14_43190	1.67394	6.00545	145.769	3.83705e-09	1.90509e-07
PA14_06420	1.67301	5.75911	34.0312	3.25076e-05	0.000159802
PA14_37340	1.67209	5.12471	51.1575	3.26498e-06	2.50035e-05
PA14_52080	-1.67194	4.26409	59.7536	1.28467e-06	1.23305e-05
ureJ	1.66833	2.64156	18.6815	0.000600124	0.00187495
PA14_18630	1.66795	7.45747	114	2.03228e-08	6.11531e-07
adhA	1.66723	8.96258	54.9519	2.13222e-06	1.79178e-05
PA14_38180	-1.66594	5.94386	44.8001	7.07374e-06	4.50818e-05
ansB	1.66412	7.68666	81.8954	1.78273e-07	2.83998e-06
hutH	1.66367	5.0081	17.6931	0.000758261	0.00227478
PA14_54870	-1.66151	7.33408	69.1532	5.20989e-07	6.18337e-06
PA14_42530	-1.6614	0.778276	2.44857	0.138417	0.203025
PA14_49070	1.65947	4.90862	23.1305	0.000227655	0.000821046
PA14_45180	1.6587	3.48687	44.7989	7.07477e-06	4.50818e-05
PA14_43140	-1.65825	2.86388	5.84644	0.0287516	0.0528221
PA14_36060	1.658	2.13352	14.4612	0.00172459	0.00466627
PA14_05790	1.65766	4.8716	44.2027	7.63939e-06	4.76602e-05
pcrH	-1.65728	2.52106	5.25805	0.0366652	0.0654634
fdx1	-1.65616	5.7594	49.4611	3.98235e-06	2.88297e-05
PA14_23400	-1.65448	9.63844	25.9341	0.000131169	0.000511457
PA14_71890	1.65378	7.49272	30.2063	6.08266e-05	0.000270048
PA14_01560	-1.65305	6.36029	117.211	1.68685e-08	5.23452e-07
rmf	-1.6511	10.1219	37.434	1.9397e-05	0.000103001
PA14_34790	1.65093	2.54696	17.9424	0.000714318	0.00216586
PA14_35810	-1.64937	8.66072	168.224	1.42743e-09	1.03715e-07
PA14_11620	-1.64784	2.96508	24.5344	0.000171851	0.000643548
gdhB	1.64647	10.0128	69.8669	4.8855e-07	5.86851e-06
orfN	-1.64491	7.75694	31.0073	5.31108e-05	0.000241427
PA14_22140	-1.64437	4.84732	73.2387	3.63193e-07	4.75584e-06
PA14_13200	-1.6436	5.81786	87.095	1.19845e-07	2.16931e-06
PA14_06880	-1.64256	6.36357	60.5192	1.18862e-06	1.16669e-05
PA14_73110	1.64253	6.63032	40.3806	1.27451e-05	7.33675e-05
nirG	-1.64107	4.34015	41.272	1.12751e-05	6.59964e-05
phnC	1.64082	5.53971	22.8631	0.000240475	0.000858447
rbsR	1.6395	6.67908	81.6898	1.81174e-07	2.86091e-06
PA14_09610	1.63793	4.85382	19.3168	0.000518356	0.00164977
PA14_56110	-1.6336	4.58747	46.8079	5.49303e-06	3.669e-05
PA14_42140	1.6328	5.71194	37.9058	1.81065e-05	9.793e-05
PA14_30680	-1.63248	3.5858	15.158	0.00143306	0.00395652
PA14_12440	1.63183	5.47362	46.6653	5.59108e-06	3.72197e-05
PA14_26580	1.63127	2.69595	25.5899	0.000140051	0.000541131
PA14_36920	-1.63089	3.28115	8.19113	0.0118451	0.0246594
PA14_63730	1.63072	3.94532	23.8711	0.000196008	0.000719543
PA14_06000	1.63036	8.60924	52.67	2.74696e-06	2.17349e-05
PA14_34370	1.63006	3.15983	40.2539	1.29712e-05	7.4456e-05
ggt	1.62909	6.92789	82.287	1.72892e-07	2.76906e-06
maiA	1.62875	6.15966	72.0442	4.02879e-07	5.13171e-06
cyoD	1.62858	3.37464	14.0268	0.00194044	0.00516583
narK2	-1.62761	3.25935	37.2609	1.98964e-05	0.000105091
PA14_50280	1.62503	8.90302	64.7929	7.81289e-07	8.73343e-06
PA14_14550	-1.62352	7.81593	118.6	1.55842e-08	4.96528e-07
PA14_11630	-1.62223	6.04247	134.598	6.61774e-09	2.79635e-07
amiR	-1.6221	4.56204	81.4738	1.8428e-07	2.88174e-06
PA14_39500	-1.62194	3.21755	21.9512	0.00029079	0.00100728
PA14_24950	1.62136	3.92523	36.124	2.35634e-05	0.000121131
PA14_29690	1.62078	4.65935	52.1777	2.90459e-06	2.28004e-05
PA14_67230	-1.61972	5.65488	37.4249	1.94229e-05	0.000103047
PA14_38020	1.61889	3.14679	33.4797	3.54677e-05	0.000172082
PA14_38610	1.61832	5.5881	31.5183	4.87701e-05	0.00022525
PA14_36880	1.61574	2.81937	18.2893	0.000657909	0.00202366
PA14_36550	1.6152	4.84763	18.2954	0.000656958	0.00202178
PA14_50860	1.61294	5.88741	80.8924	1.92944e-07	2.98588e-06
PA14_56250	1.61152	6.31534	47.862	4.82614e-06	3.30094e-05
pldA	-1.61019	6.72696	105.617	3.38207e-08	8.50226e-07
PA14_32340	-1.60933	1.22638	6.85713	0.01933	0.0374045
PA14_62680	-1.60912	11.4012	39.2719	1.48858e-05	8.30425e-05
PA14_39700	-1.60701	2.3232	5.61286	0.0316291	0.0574181
PA14_33170	-1.60683	3.46001	19.4538	0.000502427	0.00160421
cobO	1.60622	4.49694	40.8905	1.18793e-05	6.91858e-05
PA14_63440	-1.60573	2.89447	5.16713	0.0381019	0.0676031
PA14_55430	1.6033	3.34835	12.3812	0.0030893	0.00772389
PA14_24130	-1.60266	2.34934	2.48209	0.135937	0.200077
PA14_35030	-1.60207	1.24007	4.27775	0.056254	0.0940408
PA14_14420	1.60197	4.61966	20.5352	0.000394516	0.0013073
PA14_19860	1.5994	5.44495	95.7608	6.45678e-08	1.3404e-06
PA14_49750	1.5984	6.87127	148.788	3.33325e-09	1.77317e-07
PA14_60010	-1.59837	3.78132	25.479	0.000143057	0.000550249
PA14_28930	1.59709	2.66622	22.4546	0.000261679	0.000919815
PA14_19430	1.59664	5.05864	55.6791	1.97032e-06	1.69152e-05
nirL	-1.59543	5.06583	50.2685	3.62075e-06	2.69655e-05
PA14_67460	-1.59534	7.2089	73.2066	3.64198e-07	4.75853e-06
PA14_40690	1.59447	5.40257	57.1156	1.6898e-06	1.50532e-05
PA14_43780	-1.59074	3.42011	21.4829	0.000321215	0.0010936
PA14_34990	-1.58879	5.258	31.1783	5.16106e-05	0.000235629
rimJ	1.58837	2.91084	8.36178	0.0111537	0.0233804
bioF	1.58821	5.54329	62.7392	9.53043e-07	1.0176e-05
PA14_40890	1.58767	6.607	27.2998	0.000101706	0.000414759
fpr	-1.58645	7.9858	39.9816	1.34726e-05	7.652e-05
PA14_20940	1.58339	4.91718	66.6335	6.56692e-07	7.4988e-06
bkdA1	-1.58228	8.07757	51.8509	3.01486e-06	2.34498e-05
PA14_54660	1.58193	5.65181	53.7315	2.43897e-06	1.98566e-05
PA14_62330	-1.5804	5.86643	59.1146	1.37162e-06	1.29101e-05
PA14_37350	1.57999	3.78366	25.2572	0.000149291	0.00057052
PA14_08670	-1.57996	1.54627	2.91907	0.108078	0.164268
PA14_61190	1.57968	9.36339	60.6819	1.16928e-06	1.15492e-05
PA14_29320	-1.57925	4.23154	14.5405	0.00168821	0.00458449
PA14_49960	-1.57786	5.14052	49.7668	3.84083e-06	2.80094e-05
nirH	-1.57646	4.81945	33.5655	3.49875e-05	0.000170307
PA14_36670	1.5751	5.61023	21.6887	0.000307422	0.00105326
PA14_08250	1.57473	3.33035	18.0492	0.000696377	0.002119
PA14_00310	1.57441	6.95761	92.4614	8.12262e-08	1.60779e-06
edd	-1.57183	7.69312	111.389	2.37287e-08	6.66907e-07
PA14_06190	1.57163	4.95029	64.6209	7.9424e-07	8.82851e-06
PA14_33160	1.57113	8.45753	44.4868	7.36422e-06	4.64296e-05
nirM	-1.57082	6.91041	61.0022	1.13221e-06	1.13183e-05
PA14_49320	-1.57053	6.84819	102.161	4.21615e-08	9.63359e-07
norB	-1.56897	9.37833	50.8801	3.37156e-06	2.56876e-05
PA14_64500	-1.56896	6.27583	110.744	2.4667e-08	6.8122e-07
PA14_62390	-1.56849	8.01798	112.44	2.22859e-08	6.38363e-07
PA14_14060	1.56737	6.11048	108.374	2.84955e-08	7.51223e-07
PA14_14540	-1.56554	4.85148	30.1735	6.1168e-05	0.00027116
PA14_67300	1.56532	5.17342	45.3218	6.61836e-06	4.28146e-05
motB	-1.5642	7.44761	34.9085	2.83574e-05	0.000141384
PA14_72360	-1.56374	7.72685	5.40832	0.0344263	0.0619673
PA14_03710	-1.55898	6.81751	14.3229	0.00179018	0.00481312
PA14_21020	1.55833	9.64223	50.0673	3.70723e-06	2.73363e-05
thiG	1.55466	6.2533	76.3693	2.78589e-07	3.87812e-06
ureE	1.55445	4.43243	44.2281	7.61431e-06	4.75535e-05
PA14_06875	-1.553	10.3683	13.7594	0.00208848	0.00551315
PA14_18100	1.5512	5.34296	33.6074	3.47561e-05	0.000169319
PA14_11490	-1.54789	5.13777	49.087	4.16365e-06	2.96735e-05
PA14_19740	1.54771	5.86757	71.6735	4.1618e-07	5.23123e-06
PA14_19450	1.54752	5.12114	60.229	1.22404e-06	1.19359e-05
PA14_26020	1.54746	10.6237	20.2048	0.000424414	0.00139014
PA14_52560	-1.54524	4.36825	25.3823	0.000145737	0.000559472
PA14_55780	-1.54477	6.68543	125.419	1.06884e-08	3.88303e-07
PA14_44340	1.54418	7.3609	35.4267	2.61899e-05	0.000132912
PA14_58375	1.54383	7.79392	70.0647	4.79968e-07	5.78876e-06
cyaA	-1.54307	7.39413	162.261	1.83312e-09	1.2348e-07
PA14_11180	1.54274	2.86589	13.853	0.00203523	0.00539169
PA14_02420	1.54232	1.80812	9.1232	0.00858209	0.018675
nqrC	1.54129	5.72786	71.8317	4.10443e-07	5.18335e-06
aruG	1.54117	6.8391	52.0718	2.9398e-06	2.30465e-05
PA14_63650	1.54037	3.38946	17.8368	0.000732565	0.00220896
PA14_30420	-1.53954	1.40854	4.53118	0.0502098	0.0854959
PA14_21490	-1.53867	8.08772	148.316	3.40678e-09	1.79029e-07
mrcB	-1.53611	7.40746	72.5889	3.84203e-07	4.94402e-06
PA14_15680	-1.53542	5.39038	62.4001	9.85331e-07	1.04459e-05
PA14_27550	-1.53351	6.82764	133.364	7.04568e-09	2.93554e-07
cysD	-1.52951	9.36531	32.5114	4.14362e-05	0.000196401
PA14_51110	1.52937	1.14124	2.80691	0.11451	0.173028
PA14_10500	-1.52693	7.88557	55.7031	1.96523e-06	1.68966e-05
PA14_26000	1.52643	3.10613	27.9881	8.97558e-05	0.000373961
PA14_48330	1.52641	2.18364	13.8232	0.00205203	0.00543135
PA14_24310	1.52593	6.95293	82.4092	1.71251e-07	2.7576e-06
PA14_36480	1.52588	4.95669	35.3093	2.66639e-05	0.000134516
PA14_69980	-1.52558	8.23491	102.726	4.06511e-08	9.53541e-07
PA14_03163	-1.5242	10.1851	101.183	4.49295e-08	1.00258e-06
PA14_15400	-1.52363	5.22867	45.2474	6.68125e-06	4.30345e-05
popN	-1.52354	1.69201	3.95021	0.0653802	0.107037
rplO	1.52351	9.90209	31.1954	5.14633e-05	0.000235498
PA14_08260	1.52195	3.83028	21.5287	0.000318082	0.00108417
PA14_25940	1.52189	7.20863	96.6739	6.0668e-08	1.26828e-06
PA14_21550	1.52144	6.69212	74.028	3.394e-07	4.50366e-06
PA14_51120	1.52105	1.6755	9.68859	0.00710877	0.0158748
fliS	-1.51872	9.92465	77.4869	2.53988e-07	3.62892e-06
PA14_38840	1.51698	3.50761	12.1749	0.00328198	0.00814072
PA14_08420	-1.5156	6.5717	92.7143	7.97894e-08	1.58992e-06
PA14_18960	-1.51408	4.642	51.717	3.06142e-06	2.36882e-05
PA14_62060	-1.51381	12.9896	2.67343	0.122778	0.18329
PA14_55620	1.51308	3.93989	2.82888	0.113214	0.171287
PA14_12780	-1.51269	7.13541	135.929	6.18854e-09	2.63366e-07
PA14_35800	-1.51231	8.59207	136.714	5.95004e-09	2.5581e-07
PA14_01270	1.51112	6.34197	36.3277	2.28537e-05	0.000117835
PA14_39180	1.51052	2.86883	20.796	0.000372608	0.001243
PA14_61560	1.50952	4.4737	30.619	5.67023e-05	0.000254968
PA14_46860	1.50856	3.16425	16.7071	0.000964913	0.00281398
PA14_25840	1.50607	9.86849	37.1176	2.03212e-05	0.000106673
PA14_42630	-1.5056	0.510145	1.94079	0.183824	0.257518
PA14_52070	-1.50344	6.244	87.0605	1.20153e-07	2.16931e-06
pilQ	-1.50158	9.5356	150.462	3.08644e-09	1.7577e-07
PA14_35700	-1.50135	8.00647	60.6688	1.17082e-06	1.15492e-05
PA14_08640	-1.50073	6.4139	67.8283	5.87905e-07	6.84128e-06
PA14_05820	1.50041	7.26	51.9222	2.99038e-06	2.3337e-05
pilE	-1.50015	7.38216	59.2558	1.35185e-06	1.27846e-05
pilY1	-1.49893	10.1599	126.325	1.01806e-08	3.76746e-07
PA14_20520	-1.49733	7.36589	126.366	1.01582e-08	3.76746e-07
PA14_13900	-1.49667	5.75558	88.4917	1.08095e-07	2.02525e-06
PA14_01130	-1.49352	3.97781	40.1055	1.32416e-05	7.55685e-05
PA14_48840	-1.49259	4.43439	10.0732	0.00627187	0.0142408
PA14_03180	-1.49251	5.90593	99.6997	4.95301e-08	1.07309e-06
moeA2	1.49234	5.9205	71.5419	4.21021e-07	5.25879e-06
PA14_66120	-1.49168	6.83892	34.5117	3.01553e-05	0.000149596
pilP	-1.49143	6.23689	34.8903	2.84374e-05	0.000141664
fadD2	1.49059	8.00603	62.4005	9.85295e-07	1.04459e-05
PA14_38950	1.4899	2.21021	3.44538	0.0831192	0.13104
PA14_33240	-1.4894	4.5133	44.0402	7.80197e-06	4.85441e-05
PA14_34810	1.4888	7.41588	94.771	6.91196e-08	1.41517e-06
ureF	1.48831	3.1467	31.0006	5.31704e-05	0.000241455
PA14_11320	1.48788	4.12353	27.5808	9.66221e-05	0.000397017
PA14_38170	-1.48644	3.67691	23.4413	0.000213716	0.000776413
PA14_33060	1.48624	5.52985	28.7692	7.80813e-05	0.000335165
PA14_54030	1.48534	3.02024	17.0199	0.000893116	0.00264079
PA14_34600	-1.48401	5.80321	61.3439	1.09414e-06	1.10866e-05
PA14_13140	1.48393	9.97088	51.0866	3.29185e-06	2.51447e-05
pvdH	1.48362	5.47947	37.4628	1.93153e-05	0.000102751
PA14_06860	-1.48179	6.23824	50.6574	3.45998e-06	2.61064e-05
sucA	1.48174	10.452	63.6841	8.69204e-07	9.46749e-06
PA14_32540	1.48077	4.67105	38.1027	1.75969e-05	9.57328e-05
PA14_59160	-1.4807	5.4477	77.3544	2.56772e-07	3.65118e-06
PA14_29575	-1.48013	5.56158	73.426	3.5738e-07	4.69033e-06
PA14_03285	-1.48011	5.55247	100.279	4.76714e-08	1.04421e-06
PA14_59550	-1.48007	9.36991	123.503	1.18609e-08	4.13259e-07
pyoS3I	-1.47972	8.46749	68.0335	5.76928e-07	6.75312e-06
PA14_59200	-1.47665	6.80095	101.451	4.4151e-08	9.96408e-07
PA14_58500	1.47608	4.81047	24.7199	0.000165711	0.0006233
PA14_13360	-1.47368	6.10131	81.117	1.89543e-07	2.94856e-06
PA14_19850	1.47362	4.01588	39.3248	1.47749e-05	8.2656e-05
rbsK	1.47273	6.3683	58.0841	1.52625e-06	1.39256e-05
PA14_64180	1.4694	8.20051	53.0753	2.62443e-06	2.10733e-05
lolA	-1.46631	6.64299	56.1886	1.86518e-06	1.61749e-05
PA14_69320	-1.46585	7.74278	80.7984	1.94388e-07	3.00042e-06
PA14_27610	-1.46449	3.66681	7.05757	0.0179166	0.0350796
PA14_28960	1.46445	5.58486	29.4456	6.93495e-05	0.000301815
rnhB	-1.46431	6.14053	49.2629	4.07727e-06	2.92679e-05
PA14_47820	-1.46408	6.14425	97.3836	5.78206e-08	1.21301e-06
PA14_70870	1.46377	3.89154	1.92093	0.185953	0.260316
PA14_49630	1.46366	4.04242	63.5791	8.781e-07	9.54693e-06
PA14_07040	1.46243	5.40457	39.7844	1.38492e-05	7.81532e-05
PA14_36540	1.46241	2.89205	10.3592	0.00572217	0.0131581
PA14_27870	-1.46175	7.47121	70.9691	4.42844e-07	5.50827e-06
PA14_01120	-1.46111	2.97422	5.13893	0.0385609	0.0682548
glgP	1.46051	7.92601	52.8954	2.67802e-06	2.13883e-05
holC	1.45852	5.2295	110.864	2.44901e-08	6.8122e-07
PA14_21520	1.45813	5.09089	45.0313	6.8677e-06	4.40449e-05
PA14_48000	1.4574	3.1001	16.5393	0.00100611	0.00291274
PA14_30830	-1.45567	8.41516	239.312	1.19911e-10	2.83333e-08
selB	1.45484	5.69107	30.1927	6.09679e-05	0.000270474
PA14_50240	-1.45446	9.82132	113.855	2.04966e-08	6.13662e-07
PA14_59580	-1.45316	7.84969	109.354	2.68358e-08	7.13785e-07
PA14_40230	-1.45312	6.75329	103.836	3.78587e-08	9.14695e-07
PA14_28260	-1.45026	5.31335	45.6747	6.32916e-06	4.14386e-05
wbpM	-1.44949	9.67908	63.0065	9.28431e-07	1.00029e-05
PA14_20240	-1.44933	2.51845	4.97617	0.0413388	0.0725041
lasA	1.44859	8.83999	13.7792	0.0020771	0.00548797
PA14_53400	1.44661	5.54013	18.6498	0.000604574	0.00188688
PA14_72700	1.44599	6.39215	62.7689	9.50272e-07	1.01647e-05
PA14_51480	-1.44568	5.09908	23.5621	0.000208562	0.00075961
PA14_32840	-1.44538	5.29941	94.4589	7.06292e-08	1.44113e-06
PA14_20510	-1.4442	7.19612	101.672	4.3522e-08	9.85948e-07
PA14_48830	1.44386	5.0826	41.5587	1.0844e-05	6.40258e-05
PA14_38970	1.44284	2.96381	21.0463	0.00035287	0.00118524
PA14_30160	1.44281	4.38705	45.477	6.48937e-06	4.21632e-05
PA14_54090	-1.44266	4.71023	20.3412	0.000411771	0.00135543
PA14_59980	-1.44254	2.37579	13.1746	0.00245953	0.00635193
PA14_13010	-1.44231	8.11679	18.0051	0.000703729	0.0021381
PA14_11790	1.44187	6.23251	64.4933	8.04006e-07	8.90385e-06
PA14_43050	-1.44125	8.79936	68.1826	5.69101e-07	6.67461e-06
pvrR	-1.44034	8.13387	70.3721	4.6697e-07	5.70087e-06
atpA	1.43908	10.4444	26.2853	0.000122759	0.00048405
PA14_72500	-1.43842	6.95694	52.5458	2.78579e-06	2.20129e-05
PA14_23580	-1.43823	0.938513	3.32355	0.0882225	0.138251
PA14_34490	1.43709	5.16943	36.4095	2.25753e-05	0.000116655
PA14_21590	1.43689	5.26515	27.0237	0.000106998	0.000432746
rimM	1.43688	9.19793	49.5658	3.93322e-06	2.85347e-05
pepA	1.4361	7.89667	44.2582	7.58472e-06	4.74683e-05
PA14_08610	1.4352	4.10353	2.39865	0.142213	0.20752
PA14_64930	-1.43493	6.68634	109.552	2.65148e-08	7.08408e-07
PA14_38640	1.43401	6.80555	19.1136	0.000543046	0.00172191
PA14_28540	1.43389	3.00721	6.26271	0.0243417	0.0456492
PA14_37410	1.43283	4.26582	7.15327	0.017284	0.0340649
rhlA	1.43241	10.5448	20.084	0.000435979	0.00142032
glgA	1.43129	8.0235	47.2658	5.19132e-06	3.50282e-05
PA14_06530	1.43104	4.97292	47.4861	5.05283e-06	3.421e-05
PA14_49080	1.43083	4.87535	27.5409	9.73256e-05	0.000399632
PA14_00900	1.42858	2.63008	17.7283	0.000751878	0.00225791
PA14_43580	1.42407	4.41328	35.9211	2.42957e-05	0.000124359
PA14_61150	1.42391	7.73641	40.5722	1.24116e-05	7.17248e-05
PA14_40630	-1.42384	8.71104	200.115	4.24496e-10	5.15862e-08
PA14_35150	1.42371	4.7883	23.173	0.000225688	0.0008147
PA14_00470	-1.42282	8.98989	48.3781	4.53348e-06	3.14807e-05
fdx2	-1.42264	6.36242	51.916	2.99252e-06	2.3337e-05
PA14_28340	1.42126	6.32352	105.076	3.49927e-08	8.65089e-07
PA14_61140	1.42043	4.21276	41.2713	1.12763e-05	6.59964e-05
PA14_03010	-1.42009	5.85038	98.6615	5.30671e-08	1.13173e-06
PA14_63330	1.41985	4.7331	39.9835	1.34689e-05	7.652e-05
PA14_70890	-1.4198	0.575196	1.62294	0.222009	0.302269
PA14_48320	1.41979	4.33207	33.3676	3.61059e-05	0.000174576
PA14_71820	1.41809	5.78858	31.1495	5.18598e-05	0.000236586
PA14_29300	-1.41687	4.78242	82.6115	1.68573e-07	2.73667e-06
PA14_73100	1.4167	3.22274	13.5315	0.00222494	0.00580902
PA14_21540	1.41582	8.32988	75.3161	3.04269e-07	4.17705e-06
PA14_46750	1.41504	4.91352	70.122	4.77514e-07	5.77085e-06
rpoB	1.41502	12.275	37.7801	1.84405e-05	9.92488e-05
PA14_10540	-1.41488	7.22187	87.7226	1.14395e-07	2.0907e-06
PA14_17590	-1.41482	5.04149	33.9009	3.31806e-05	0.000162441
PA14_08190	1.41469	2.00086	4.53187	0.0501945	0.0854942
PA14_67210	-1.41303	6.90552	86.2557	1.276e-07	2.27616e-06
PA14_52090	-1.41255	5.53173	87.9327	1.12634e-07	2.07168e-06
PA14_40160	-1.41214	2.35377	4.09203	0.0612298	0.101139
PA14_30690	-1.4111	7.69785	77.7011	2.49559e-07	3.59149e-06
cupD5	-1.41017	5.37498	50.1349	3.67793e-06	2.71538e-05
htpG	-1.41005	9.3889	35.0255	2.78508e-05	0.000139324
PA14_28950	1.4088	4.12121	60.0254	1.2496e-06	1.21059e-05
arsR	-1.4086	3.5207	29.795	6.52775e-05	0.000286605
PA14_32590	1.40759	5.28835	74.8103	3.17548e-07	4.31646e-06
PA14_73090	1.40653	5.71333	26.7331	0.00011291	0.000450581
PA14_47930	1.40632	3.27586	23.9468	0.000193065	0.00071005
PA14_37400	1.40632	2.98086	16.562	0.00100043	0.00290052
PA14_46270	-1.40482	3.48996	14.2888	0.00180682	0.00484693
pscL	-1.40456	2.14786	3.80315	0.0700395	0.113795
PA14_69600	-1.40327	7.38718	71.8265	4.10631e-07	5.18335e-06
PA14_58740	-1.40314	0.87823	2.79806	0.115036	0.173559
PA14_07410	-1.40276	1.91396	4.48445	0.0512647	0.086969
PA14_69020	-1.40254	5.57775	58.3938	1.47779e-06	1.37359e-05
glyS	1.40239	6.84565	62.8946	9.38643e-07	1.00946e-05
arcD	1.40223	9.73288	27.6483	9.54434e-05	0.000393531
PA14_01200	-1.40132	5.08939	54.9009	2.14413e-06	1.79421e-05
PA14_33080	1.40091	2.87275	15.8262	0.00120508	0.00340924
PA14_47970	1.39908	3.90837	19.0884	0.000546205	0.00172916
PA14_58840	-1.39759	6.63077	125.747	1.05011e-08	3.83839e-07
PA14_40030	1.3973	5.7711	44.4564	7.3931e-06	4.65624e-05
PA14_61000	-1.39505	5.10211	49.9095	3.77672e-06	2.76774e-05
PA14_59700	-1.39491	4.2104	3.06244	0.10048	0.154413
PA14_44920	-1.39481	7.97288	106.703	3.15991e-08	8.11498e-07
PA14_12810	-1.3948	5.22734	47.2985	5.17047e-06	3.4927e-05
PA14_44930	-1.39421	3.99464	32.1294	4.40981e-05	0.000207533
PA14_60730	1.39404	6.7656	21.717	0.000305579	0.00104755
PA14_08270	1.39404	4.08334	22.0836	0.000282791	0.000983003
nuoG	1.39361	8.22057	104.628	3.60002e-08	8.82672e-07
PA14_03250	-1.39339	6.33303	127.036	9.80078e-09	3.76729e-07
PA14_62250	-1.39212	6.89999	61.6566	1.06057e-06	1.08746e-05
PA14_23770	1.39206	3.82847	24.008	0.00019072	0.000703598
PA14_52350	-1.39195	6.29532	40.6803	1.22278e-05	7.0869e-05
PA14_15590	-1.39043	8.77111	122.659	1.24228e-08	4.18165e-07
PA14_66110	-1.3899	7.6966	75.4318	3.0132e-07	4.1557e-06
pqsD	1.3893	7.631	22.8259	0.000242325	0.000862877
PA14_13190	-1.38927	8.32446	115.249	1.8892e-08	5.74277e-07
PA14_72710	1.38902	6.96232	88.3651	1.09104e-07	2.02913e-06
PA14_48880	-1.38859	5.37796	43.7542	8.09779e-06	5.01524e-05
cyoA	1.38788	6.08261	28.5731	8.08424e-05	0.000344149
prfH	1.38781	3.27058	25.7096	0.000136889	0.000530289
PA14_69330	-1.38767	6.27676	77.2466	2.59063e-07	3.675e-06
PA14_56130	-1.38718	5.19477	71.8735	4.08943e-07	5.18335e-06
PA14_13060	-1.38637	4.12269	51.8613	3.01129e-06	2.34498e-05
PA14_10350	-1.38603	5.93725	19.4072	0.000507788	0.00161959
PA14_04270	-1.38548	5.44871	78.7085	2.29871e-07	3.39003e-06
PA14_34580	-1.38498	2.02938	3.95082	0.0653619	0.107037
PA14_34250	1.38416	3.57627	35.377	2.63894e-05	0.000133357
PA14_12820	-1.38376	4.55078	45.0389	6.86099e-06	4.40449e-05
PA14_37640	1.38295	3.96697	22.0157	0.000286865	0.000996002
PA14_69520	-1.3816	7.89464	139.818	5.10453e-09	2.32159e-07
PA14_31850	1.38005	6.00044	95.4465	6.59752e-08	1.36014e-06
cyoE	1.37955	5.21039	23.08	0.000230017	0.000828061
acnB	1.37755	9.65277	60.3743	1.20616e-06	1.17808e-05
PA14_10830	-1.37725	5.15202	58.4573	1.46807e-06	1.37097e-05
PA14_64540	1.3772	2.6274	9.96844	0.00648806	0.0146535
PA14_68030	-1.37648	2.45264	4.68541	0.046904	0.0806738
def	-1.37539	7.91217	130.695	8.08398e-09	3.25435e-07
PA14_42990	-1.37526	5.0657	23.9501	0.000192936	0.000710013
PA14_05560	1.37204	8.80125	65.7984	7.10201e-07	8.05977e-06
bkdB	-1.37187	7.01827	70.1671	4.75591e-07	5.7593e-06
PA14_41330	-1.37125	2.29905	8.18812	0.0118578	0.0246678
PA14_10340	-1.3711	4.88794	26.3939	0.000120286	0.000475555
PA14_46550	-1.36922	8.36027	59.2167	1.35728e-06	1.28156e-05
PA14_55000	-1.36917	3.6735	24.4631	0.000174278	0.000651412
PA14_67220	-1.36879	5.47002	44.5045	7.34741e-06	4.63727e-05
PA14_31800	1.3682	6.69463	74.9432	3.13996e-07	4.2908e-06
nqrB	1.36779	6.34444	31.2873	5.06803e-05	0.00023263
PA14_28970	-1.36733	2.58036	8.96588	0.00905226	0.0195836
PA14_15260	1.36681	1.31354	3.7196	0.0731265	0.117913
rbsB	1.36627	9.38501	77.8278	2.46981e-07	3.56441e-06
PA14_00690	1.36501	3.39915	20.5074	0.000396937	0.00131313
PA14_67380	-1.36494	3.84333	41.8569	1.04153e-05	6.18073e-05
PA14_06540	1.36486	4.1084	56.3147	1.84017e-06	1.60207e-05
cupC2	-1.36483	3.29519	21.2667	0.000336465	0.00113845
cysK	1.36478	7.39371	97.421	5.76748e-08	1.21301e-06
pdxH	1.3642	6.43232	73.175	3.65192e-07	4.75867e-06
PA14_59560	-1.36362	3.55063	33.4693	3.55265e-05	0.000172227
nuoF	1.36352	7.45254	76.8546	2.67589e-07	3.75044e-06
PA14_48620	1.3632	3.18478	5.82284	0.0290281	0.0532972
PA14_41780	1.36227	6.27925	58.2318	1.50291e-06	1.37576e-05
PA14_39990	1.3616	6.16563	32.5578	4.11257e-05	0.000195085
PA14_27250	1.36158	2.47344	10.9135	0.0048064	0.0113457
PA14_15360	-1.36015	7.74647	64.2228	8.25167e-07	9.05405e-06
PA14_29030	1.36005	4.72866	36.4998	2.22729e-05	0.000115393
napc	-1.35981	5.88827	62.6199	9.64268e-07	1.02591e-05
wzz	-1.3598	10.0755	32.1658	4.38364e-05	0.000206464
PA14_53610	-1.35949	5.31332	12.433	0.00304297	0.00762726
cupB3	-1.35874	5.76856	56.8023	1.7469e-06	1.53965e-05
PA14_26970	-1.35815	6.61277	121.719	1.30845e-08	4.33097e-07
PA14_63450	-1.35802	4.56492	28.3943	8.34544e-05	0.000352639
PA14_54860	-1.35765	5.62232	55.4463	2.02058e-06	1.7198e-05
PA14_56200	-1.35722	6.99866	24.0521	0.000189053	0.000698746
gnuT	-1.35694	5.4996	41.2293	1.1341e-05	6.63097e-05
glcE	-1.35683	3.13688	8.33076	0.0112758	0.023589
PA14_33250	-1.35591	4.84647	14.5252	0.00169519	0.00459584
PA14_27190	-1.35586	5.57392	10.8172	0.00495272	0.0116358
pilS2	-1.35522	3.16655	13.918	0.00199917	0.0053056
PA14_66000	1.35497	5.08759	44.506	7.34603e-06	4.63727e-05
PA14_14810	-1.35491	6.67946	57.6464	1.59783e-06	1.44023e-05
qor	1.35427	5.81414	27.2719	0.000102226	0.000416596
PA14_52020	1.35419	6.4703	123.085	1.21351e-08	4.18165e-07
PA14_44400	1.35418	8.13211	50.2908	3.61131e-06	2.69289e-05
pcaK	1.35275	2.57584	8.47561	0.0107182	0.022605
PA14_07140	1.35272	5.57913	42.5181	9.53142e-06	5.75362e-05
PA14_46220	1.35227	4.36635	14.1377	0.00188251	0.00503184
PA14_10380	1.35166	7.66066	47.1225	5.28366e-06	3.54505e-05
glpQ	1.35152	4.71417	32.9469	3.86212e-05	0.000184675
PA14_07470	-1.35094	0.31475	1.23094	0.331896	0.42271
PA14_41020	1.35036	7.51801	32.1079	4.42537e-05	0.000207936
PA14_21175	1.35024	6.56568	57.5032	1.62206e-06	1.45986e-05
PA14_49530	-1.34902	3.00828	26.6401	0.00011488	0.000456915
PA14_58010	-1.34801	5.24894	25.8891	0.000132295	0.000515171
catR	1.34788	2.9889	18.3767	0.000644501	0.0019892
PA14_26780	-1.34557	6.91462	27.8781	9.15534e-05	0.000379436
PA14_26400	1.34546	1.53029	5.6245	0.0314781	0.0571614
PA14_10040	1.34543	5.25676	55.9114	1.92157e-06	1.66164e-05
PA14_37610	1.3444	4.58178	33.3638	3.61283e-05	0.000174576
PA14_23570	-1.3439	2.6933	6.43735	0.0227281	0.0429477
PA14_40270	-1.34382	4.29287	31.4438	4.9377e-05	0.000227305
PA14_33290	1.34334	8.1952	73.1051	3.67403e-07	4.75867e-06
PA14_62350	-1.34305	6.95498	74.1064	3.37136e-07	4.49364e-06
guaA	1.34061	8.25587	58.2273	1.50362e-06	1.37576e-05
PA14_01780	1.34052	6.23252	67.0733	6.30367e-07	7.26446e-06
PA14_55230	1.34024	2.95632	18.1308	0.000683027	0.00208477
PA14_08010	1.34002	4.3586	15.0368	0.00147946	0.00406767
PA14_42770	-1.33922	4.24942	14.721	0.00160864	0.00438238
PA14_32490	-1.3388	5.83966	25.57	0.000140587	0.000542496
pqsC	1.3382	7.71523	22.4918	0.000259667	0.00091328
PA14_03590	1.33797	7.32797	51.404	3.17346e-06	2.44283e-05
PA14_28870	-1.33563	5.00021	37.982	1.79073e-05	9.69925e-05
PA14_29230	1.33516	5.39514	46.7693	5.51937e-06	3.68246e-05
PA14_32470	-1.33505	3.92915	2.85409	0.11175	0.169373
PA14_51610	1.33433	2.80145	8.86337	0.00937451	0.0201709
ppc	1.33402	7.23971	168.372	1.41873e-09	1.03715e-07
PA14_59020	-1.33242	2.59074	18.7189	0.000594927	0.00186263
PA14_22550	-1.33202	4.259	29.7063	6.62844e-05	0.000290384
mtlZ	1.33185	4.45678	34.9132	2.83368e-05	0.000141384
PA14_54720	-1.33171	3.49319	14.0683	0.00191853	0.00511665
PA14_72230	-1.3303	7.22686	52.528	2.79139e-06	2.20279e-05
amiE	-1.33008	8.36426	79.9977	2.07193e-07	3.13314e-06
icd	1.32936	11.3945	53.5773	2.48119e-06	2.01128e-05
atpD	1.32911	10.0912	26.8337	0.000110822	0.000444333
PA14_56990	1.32886	6.21243	44.8588	7.02075e-06	4.49298e-05
PA14_62050	1.32772	3.88375	2.21997	0.156898	0.225361
PA14_28620	1.32759	6.34858	34.0058	3.26376e-05	0.000160177
PA14_60110	-1.32731	8.65647	138.294	5.50143e-09	2.47706e-07
PA14_11330	1.32719	3.37782	12.2392	0.0032205	0.00800489
tktA	1.32613	8.48097	61.4455	1.08311e-06	1.10101e-05
pelG	-1.32608	4.96118	30.3825	5.90258e-05	0.000263823
PA14_69050	-1.32602	6.18679	99.9152	4.88298e-08	1.06178e-06
rluC	-1.32553	6.67365	41.3405	1.11704e-05	6.56341e-05
PA14_35760	-1.32502	8.30902	20.0345	0.000440815	0.00143283
pilM	-1.32372	8.89353	109.878	2.59945e-08	7.00793e-07
fadH2	1.32249	2.91592	11.8215	0.00364467	0.00894356
rpmE2	-1.32221	6.24338	29.8627	6.452e-05	0.000283697
PA14_13450	-1.32181	3.66878	21.2579	0.000337102	0.00113987
PA14_23490	-1.32169	1.73435	2.23125	0.155917	0.22433
aceF	1.31915	8.28211	91.5266	8.6796e-08	1.70109e-06
PA14_22160	-1.31903	3.47868	9.81624	0.00681758	0.0152876
PA14_71590	-1.3188	9.58528	50.7205	3.43464e-06	2.6002e-05
PA14_36700	1.31857	5.94762	14.1175	0.00189295	0.00505521
PA14_36050	1.31782	2.79763	11.4686	0.00405323	0.00980078
PA14_57130	-1.31697	7.79323	107.074	3.08785e-08	8.03412e-07
PA14_53660	-1.31615	6.98892	67.0899	6.29394e-07	7.26446e-06
PA14_37770	1.31519	5.9125	48.9719	4.22128e-06	2.99325e-05
PA14_59820	-1.31498	4.89913	16.2294	0.00108759	0.00311778
PA14_46890	1.31457	6.71957	22.3894	0.000265258	0.000931294
PA14_52320	-1.31303	3.9576	5.31134	0.0358524	0.064166
aprI	1.31239	6.93945	50.4795	3.53247e-06	2.65403e-05
PA14_36850	1.31231	6.31874	17.7371	0.000750278	0.00225424
PA14_22220	-1.31212	3.23307	11.0737	0.00457386	0.0108669
prtR	-1.31192	5.65484	58.2595	1.49859e-06	1.37576e-05
PA14_26485	1.31187	4.16045	14.1317	0.00188561	0.00503787
PA14_48630	1.31143	3.33789	28.472	8.23081e-05	0.000348537
pilV2	-1.31085	5.96144	81.436	1.8483e-07	2.88277e-06
nuoI	1.30989	5.76627	66.6697	6.54484e-07	7.4988e-06
PA14_22710	1.30912	4.85508	25.3181	0.00014755	0.000564978
PA14_62650	-1.3084	9.30639	78.7495	2.29107e-07	3.39003e-06
gloA1	-1.30836	7.04513	90.6866	9.21724e-08	1.783e-06
PA14_30720	-1.30775	4.44274	6.59276	0.0213955	0.0408048
PA14_39470	-1.3076	8.97419	37.3612	1.96054e-05	0.000103738
PA14_49030	-1.30719	9.43377	35.47	2.60175e-05	0.00013215
hitA	-1.30636	6.52018	122.819	1.23141e-08	4.18165e-07
era	-1.30595	7.98225	27.7785	9.32176e-05	0.000385153
pstA	-1.30518	7.91545	22.6985	0.000248775	0.00088069
phaC1	1.30457	8.27316	60.8179	1.15337e-06	1.14339e-05
PA14_11370	1.30454	3.72336	23.9324	0.000193618	0.000711646
PA14_03330	-1.30427	4.45439	12.6613	0.00284803	0.00722263
PA14_66520	-1.30385	2.96167	14.3362	0.00178378	0.00480458
PA14_18250	-1.3034	4.54376	28.2814	8.51545e-05	0.000358263
PA14_48780	1.30339	4.6851	50.6534	3.46157e-06	2.61064e-05
PA14_38990	1.30248	2.41591	8.8944	0.00927559	0.019987
pilO	-1.30238	6.8099	84.3207	1.47742e-07	2.48507e-06
PA14_01220	-1.30135	4.58547	52.0116	2.96003e-06	2.31442e-05
PA14_65420	-1.30126	7.08912	99.5724	4.9949e-08	1.07825e-06
oprO	1.301	6.7158	39.4311	1.45546e-05	8.15772e-05
PA14_36790	1.30044	3.70206	14.3333	0.00178517	0.00480618
PA14_17280	1.29974	6.97037	55.0827	2.10202e-06	1.77643e-05
PA14_06040	-1.29918	8.41879	50.3834	3.57236e-06	2.67725e-05
PA14_59845	-1.29793	6.09631	37.8239	1.83233e-05	9.87072e-05
PA14_46330	1.2978	3.67715	28.8599	7.68419e-05	0.00033032
PA14_12900	-1.29752	9.77332	60.9421	1.13907e-06	1.13398e-05
PA14_35240	1.29621	2.36308	12.8911	0.00266601	0.00682307
PA14_50310	-1.2954	5.4443	19.4397	0.000504039	0.0016085
etfB	1.29444	9.24784	41.5125	1.09122e-05	6.42441e-05
PA14_52340	-1.29442	3.55832	19.0133	0.000555733	0.00175653
PA14_00530	-1.29438	4.98442	27.8641	9.17851e-05	0.000379497
braC	1.29431	9.27392	34.0125	3.26029e-05	0.000160138
PA14_22960	-1.29427	5.17481	32.8451	3.92594e-05	0.000187426
pgl	-1.29322	4.73651	22.3653	0.000266596	0.000934342
PA14_46740	1.29071	4.81533	39.3096	1.48067e-05	8.27562e-05
PA14_10530	-1.29066	6.63442	85.3821	1.36281e-07	2.35572e-06
PA14_61130	1.28969	5.66376	21.4368	0.000324398	0.00110254
PA14_49940	-1.28846	7.32358	47.844	4.83673e-06	3.30094e-05
PA14_21890	1.28818	6.40781	116.193	1.78853e-08	5.46464e-07
PA14_18870	-1.28666	6.08026	9.79597	0.00686289	0.0153834
PA14_38930	1.28646	4.09363	26.9072	0.000109325	0.000439748
PA14_61370	1.28641	4.25944	39.7089	1.39967e-05	7.8834e-05
PA14_59030	-1.28591	0.99172	1.85601	0.193132	0.268411
fdnG	1.28569	10.4659	77.5405	2.52871e-07	3.62165e-06
pagL	-1.28522	10.3349	41.9913	1.02284e-05	6.08799e-05
PA14_70550	1.285	5.03232	56.2899	1.84505e-06	1.60245e-05
amiC	-1.28494	5.17647	26.564	0.000116522	0.000462516
clpS	-1.28448	9.73529	46.1827	5.9377e-06	3.92204e-05
merE	1.28361	2.44717	7.25877	0.0166162	0.0329998
PA14_28980	-1.28313	2.90212	3.51059	0.080532	0.127813
PA14_07260	1.28246	4.44268	37.2489	1.99317e-05	0.000105184
argC	1.28195	6.39324	47.6046	4.98012e-06	3.37945e-05
cobT	1.28163	3.10705	14.5266	0.00169456	0.00459584
PA14_07300	-1.28108	5.59662	84.0441	1.50906e-07	2.51849e-06
PA14_16960	1.27917	4.62845	70.1917	4.74548e-07	5.75837e-06
pdxB	-1.27829	6.47741	71.564	4.20202e-07	5.25879e-06
PA14_12330	-1.27786	7.8006	16.8707	0.000926567	0.00272098
selA	1.27783	5.63192	53.3043	2.55796e-06	2.06509e-05
PA14_09820	1.27721	7.2843	67.7609	5.91558e-07	6.87037e-06
PA14_14530	-1.27659	7.30762	80.0548	2.06248e-07	3.13314e-06
PA14_53630	-1.27607	3.09171	20.5179	0.000396026	0.00131157
PA14_38690	1.27507	5.06816	25.9569	0.000130606	0.000510596
hprA	1.27448	4.63703	40.18	1.3105e-05	7.49325e-05
PA14_60060	-1.27369	3.9379	21.9658	0.000289899	0.00100478
PA14_53570	-1.27303	5.66626	49.8639	3.79708e-06	2.77924e-05
wspA	-1.27299	7.78866	64.2296	8.24624e-07	9.05405e-06
PA14_62170	-1.27238	5.29458	28.6624	7.95713e-05	0.000340309
purD	1.27191	6.1543	46.3546	5.81149e-06	3.85578e-05
PA14_34070	1.27089	5.96918	15.9056	0.00118085	0.00335025
PA14_59120	-1.27001	3.41754	16.7731	0.000949218	0.002775
PA14_13220	1.26917	5.95155	12.8842	0.00267132	0.00683373
PA14_28600	-1.26668	6.55661	9.22726	0.00828647	0.0181244
PA14_27560	1.26605	5.07932	44.8224	7.05355e-06	4.50818e-05
PA14_23240	1.26502	6.0737	54.9714	2.12768e-06	1.7905e-05
mtlD	1.26492	2.44928	11.947	0.00351085	0.00864722
PA14_27720	1.26434	4.8336	41.5396	1.08722e-05	6.40715e-05
PA14_48030	1.26296	6.13145	54.7949	2.1691e-06	1.81002e-05
PA14_13370	-1.26284	5.12172	29.2256	7.20621e-05	0.000312025
PA14_19700	1.26267	7.00519	20.3113	0.000414499	0.00136291
PA14_19940	-1.26235	5.47028	48.2387	4.61051e-06	3.19041e-05
PA14_67200	-1.26208	6.60876	48.6532	4.38568e-06	3.08469e-05
exaB	1.26163	1.25347	3.93542	0.0658321	0.107607
PA14_70930	-1.26127	7.36965	54.238	2.30597e-06	1.90819e-05
PA14_14390	1.26125	7.71047	25.6129	0.000139437	0.000539458
PA14_26150	-1.25989	4.05144	18.5431	0.000619832	0.00192743
prpB	1.25983	6.53734	10.5931	0.00531345	0.0123711
PA14_64420	1.25982	2.37071	10.7872	0.00499943	0.011727
PA14_08690	1.2598	0.661384	1.34752	0.263798	0.349269
PA14_67260	1.25856	4.94479	22.7572	0.000245782	0.000872687
hexR	-1.25746	5.9881	67.1244	6.27382e-07	7.25814e-06
rpsR	1.25726	8.59662	23.0549	0.000231198	0.00083181
PA14_52850	1.2569	1.16323	5.74938	0.038514	0.0682326
PA14_40900	1.25669	3.33481	17.9372	0.000715196	0.00216742
PA14_44960	1.25566	2.947	10.392	0.0056627	0.0130516
PA14_59950	-1.25542	2.11167	11.7019	0.00473819	0.0112069
PA14_36370	1.25529	5.3679	17.7524	0.000747532	0.00224826
PA14_12270	1.25521	5.21266	70.2849	4.70614e-07	5.72228e-06
PA14_35770	-1.25464	8.70127	18.4175	0.00063835	0.00197779
PA14_71250	-1.25442	2.02671	3.88722	0.0673298	0.109844
PA14_20470	-1.25292	4.28255	5.22406	0.0371948	0.0662897
PA14_53580	-1.25231	6.14788	45.5225	6.45212e-06	4.20588e-05
braD	1.25207	5.88316	78.3391	2.36878e-07	3.44225e-06
hepA	1.25141	7.35403	85.9502	1.30562e-07	2.31207e-06
rimI	-1.25093	4.83803	14.3245	0.00178944	0.00481312
PA14_52530	-1.25075	4.97657	38.1514	1.74735e-05	9.51616e-05
pgk	1.25038	7.24135	106.496	3.20098e-08	8.18517e-07
PA14_16730	-1.24887	6.19959	18.3842	0.000643359	0.00198917
aspC	1.24851	4.44111	24.0185	0.000190321	0.00070256
PA14_63860	1.24841	2.15992	9.45649	0.00767547	0.0169498
PA14_64430	1.24841	5.48938	63.3046	9.01832e-07	9.7693e-06
pcrD	-1.24758	4.59472	24.8071	0.000162913	0.000616533
PA14_65810	1.24717	3.39046	23.9846	0.000191612	0.000706016
PA14_26350	1.24704	5.29652	23.3726	0.000216711	0.000786336
PA14_57890	-1.24688	7.92441	44.7348	7.13318e-06	4.54054e-05
PA14_53670	-1.24663	7.52933	76.8289	2.68158e-07	3.75044e-06
PA14_60760	-1.24659	5.11353	41.8357	1.04452e-05	6.19227e-05
PA14_08100	1.24623	4.37759	14.614	0.00165529	0.00450328
xcpQ	-1.24617	8.43461	12.3697	0.00309968	0.00774417
hmgA	1.24601	8.34789	69.4563	5.06922e-07	6.05879e-06
PA14_40380	-1.24503	4.63447	18.6151	0.000609498	0.00189926
rpmD	1.24497	8.47635	26.1505	0.000125913	0.000494082
PA14_20550	-1.24485	2.72595	8.91981	0.00919547	0.019843
PA14_32530	1.24401	4.7113	53.9132	2.39028e-06	1.95383e-05
PA14_30740	-1.24342	3.40408	18.8504	0.000577038	0.00181233
PA14_05290	-1.24327	5.50609	30.0814	6.21403e-05	0.000275265
PA14_15840	-1.24304	7.45339	94.1862	7.19793e-08	1.46366e-06
dkgB	-1.24236	2.51691	9.5645	0.00740557	0.0164024
PA14_15100	-1.24099	6.65537	35.4854	2.59565e-05	0.000131953
PA14_32770	1.24051	5.75985	61.6437	1.06193e-06	1.08746e-05
PA14_54010	1.24034	4.2645	25.3276	0.00014728	0.000564666
PA14_22480	-1.23816	6.67188	57.0736	1.69733e-06	1.50532e-05
PA14_23650	1.23763	4.6296	22.6341	0.00025211	0.000889852
purH	1.23604	7.19416	70.7839	4.50175e-07	5.56461e-06
PA14_60080	-1.2359	8.41765	103.149	3.9562e-08	9.39085e-07
PA14_48740	1.23579	5.11109	29.3775	7.01773e-05	0.000304528
PA14_27230	-1.23559	4.85729	77.5418	2.52845e-07	3.62165e-06
lrp	-1.23506	6.04925	48.4824	4.47681e-06	3.11864e-05
pauA	1.23495	4.01794	18.9725	0.000560986	0.00176938
PA14_08310	-1.23488	7.22191	60.9661	1.13633e-06	1.13398e-05
tal	1.23419	9.1634	94.9617	6.82147e-08	1.40146e-06
PA14_43000	-1.23395	5.70592	23.9728	0.000192064	0.000707242
PA14_28840	-1.23388	8.63353	48.6268	4.39962e-06	3.08469e-05
PA14_46950	1.23349	7.23746	34.2066	3.16256e-05	0.000155852
PA14_01360	1.23323	3.89473	12.8754	0.00267805	0.006848
fabG_4	1.23291	6.33647	47.1027	5.29659e-06	3.54973e-05
PA14_10940	1.23254	5.41775	44.2441	7.59852e-06	4.75047e-05
PA14_52510	1.23247	2.61096	11.096	0.00454244	0.0108082
PA14_38570	1.23222	5.43122	45.5069	6.46482e-06	4.20622e-05
rsmA	-1.23215	10.2652	45.2588	6.67152e-06	4.30183e-05
PA14_15500	-1.23162	4.09166	14.1756	0.00186322	0.00498476
PA14_68510	1.23158	4.33675	16.0316	0.00114353	0.0032552
PA14_59800	-1.22854	7.16669	70.0022	4.82661e-07	5.80948e-06
PA14_37660	1.22834	6.15958	43.3059	8.5874e-06	5.24569e-05
PA14_32190	1.22753	5.76778	22.0347	0.000285718	0.000992599
PA14_11010	-1.2274	4.43482	19.8687	0.000457482	0.00147974
PA14_16710	1.22577	5.17953	60.8742	1.14687e-06	1.13884e-05
ampR	-1.22562	5.21171	51.3831	3.18108e-06	2.44554e-05
PA14_03470	1.2256	5.23444	29.0545	7.42556e-05	0.000320127
PA14_67310	1.22538	4.98026	29.0336	7.45285e-05	0.000321071
PA14_12860	-1.22504	5.49781	30.9695	5.34489e-05	0.000242535
PA14_35750	-1.22474	7.14351	28.5786	8.07627e-05	0.000344149
mutL	-1.22435	7.58131	33.3527	3.61917e-05	0.0001746
moaA2	1.22427	7.99411	54.0134	2.3639e-06	1.93996e-05
metF	1.22382	6.45421	54.3824	2.26958e-06	1.88331e-05
PA14_10300	1.22236	3.7374	9.2931	0.00810547	0.0177807
rplD	1.22203	10.1376	15.1904	0.00142091	0.00392661
PA14_53260	1.22174	5.54567	38.6419	1.62827e-05	8.94948e-05
PA14_06840	-1.22169	8.35193	49.4193	4.00214e-06	2.88647e-05
coxA	1.22103	8.53151	40.3313	1.28324e-05	7.37987e-05
PA14_62040	-1.22057	6.91542	86.743	1.23031e-07	2.20788e-06
PA14_59100	-1.21891	5.71853	61.0412	1.12779e-06	1.13029e-05
PA14_26850	1.21859	2.62665	9.28334	0.00813202	0.0178258
aprE	1.21848	6.16337	25.7495	0.000135852	0.000527644
PA14_48790	1.21824	6.0386	50.2388	3.63337e-06	2.69729e-05
PA14_37440	1.21659	2.03627	10.3579	0.00640042	0.0144775
PA14_53270	1.21644	4.41104	29.2441	7.183e-05	0.000311246
gacA	-1.21638	8.04035	119.657	1.46806e-08	4.80588e-07
PA14_32950	1.21629	5.42806	32.6374	4.05986e-05	0.000192892
PA14_32970	1.2153	3.75573	20.9887	0.000357305	0.00119664
exsC	-1.21523	5.67864	48.2829	4.58589e-06	3.17706e-05
pslM	1.21469	2.43377	11.7103	0.00376817	0.00919737
pilW	-1.2142	7.65421	98.6568	5.3084e-08	1.13173e-06
PA14_68080	1.21361	5.49677	61.749	1.05088e-06	1.08746e-05
cysH	-1.21276	6.07191	17.1268	0.000869986	0.00257879
PA14_58850	-1.21214	5.28385	14.4502	0.00172973	0.00467591
PA14_23110	1.21201	7.62513	16.1923	0.00109783	0.00313862
PA14_57190	1.21195	6.90971	104.186	3.70253e-08	9.04084e-07
PA14_55980	1.21022	6.91716	49.429	3.99753e-06	2.88647e-05
PA14_07330	-1.2098	7.73538	24.1383	0.000185838	0.000688801
PA14_15650	-1.20977	5.18658	47.4333	5.08564e-06	3.4393e-05
PA14_35210	1.20926	3.88749	20.7281	0.000378174	0.00125945
PA14_47960	1.20878	3.25205	7.18738	0.0170648	0.0337444
aceK	-1.20872	7.85159	110.37	2.52312e-08	6.86427e-07
PA14_50790	1.2087	5.10592	29.4768	6.8975e-05	0.000300404
PA14_44840	1.20842	4.762	30.2895	5.9968e-05	0.000266895
rhl	-1.2083	8.26782	55.546	1.99889e-06	1.71073e-05
kdsB	1.20807	5.92742	28.9248	7.59676e-05	0.000326798
PA14_60040	-1.20667	5.80917	69.5203	5.04008e-07	6.04201e-06
PA14_61540	-1.20518	4.63655	34.9247	2.82868e-05	0.000141268
aspA	-1.2048	8.36121	19.0331	0.000553203	0.00174946
PA14_62030	-1.20465	5.81103	61.1193	1.119e-06	1.12428e-05
PA14_25140	-1.20435	6.32705	60.7178	1.16505e-06	1.15305e-05
PA14_40220	-1.2043	5.9108	25.7454	0.000135958	0.00052771
PA14_46540	-1.2041	9.47111	72.3742	3.91445e-07	5.02635e-06
arnT	1.20395	2.67859	7.80001	0.0136239	0.0278365
PA14_07970	1.20258	1.15419	4.02498	0.0966938	0.149404
PA14_31530	1.20258	7.09686	61.4303	1.08475e-06	1.10101e-05
PA14_29410	1.20239	5.23942	53.2514	2.57314e-06	2.07367e-05
PA14_13660	1.20183	3.24043	5.44865	0.0338527	0.0609902
lexA	-1.20144	6.91866	62.013	1.02372e-06	1.07006e-05
PA14_24960	1.20123	4.46807	36.5629	2.20639e-05	0.00011451
PA14_43910	-1.20068	6.78299	34.2995	3.11691e-05	0.000154113
PA14_43520	1.20023	5.59577	33.9757	3.27921e-05	0.000160803
nuoN	1.20007	6.36643	82.8681	1.65243e-07	2.68993e-06
PA14_30700	-1.1999	7.64721	70.448	4.63819e-07	5.6978e-06
ansA	1.19953	3.45558	16.4327	0.00103333	0.00298574
PA14_24630	-1.19936	3.78465	18.7828	0.000586157	0.00184
PA14_42780	-1.19902	8.26161	49.2008	4.10751e-06	2.94141e-05
PA14_02200	-1.19771	4.09111	12.7676	0.00276217	0.0070329
PA14_54900	-1.19663	5.99458	37.0532	2.05152e-05	0.000107346
PA14_58360	1.19601	7.54134	78.5255	2.33312e-07	3.41542e-06
PA14_09300	-1.19521	5.64285	10.9839	0.00470255	0.0111447
PA14_44270	-1.1944	5.07222	52.6954	2.73908e-06	2.17014e-05
PA14_46020	1.19345	3.77356	16.2477	0.00108259	0.00310846
PA14_68140	1.19231	6.18683	16.8708	0.000926555	0.00272098
PA14_10490	-1.19194	5.12109	21.6338	0.000311031	0.00106379
PA14_67790	-1.19058	7.08161	79.1948	2.21002e-07	3.31245e-06
PA14_08030	1.1892	4.94357	25.3208	0.000147472	0.000564978
PA14_29420	1.18879	6.11182	33.9129	3.31181e-05	0.000162268
PA14_55560	1.18866	3.6539	2.38896	0.142965	0.208413
hisQ	1.18866	2.33972	6.74466	0.0201793	0.0388208
PA14_05300	-1.18786	5.02147	21.7747	0.000301856	0.00103717
alkB1	-1.18779	5.96413	36.202	2.32887e-05	0.000119822
PA14_59660	-1.18742	4.13469	33.6524	3.45091e-05	0.000168253
flhB	-1.18694	5.43101	32.0948	4.43486e-05	0.000208218
mdcC	1.1868	1.55343	4.72931	0.0460101	0.0792966
PA14_02560	1.18677	3.32776	8.41239	0.0109576	0.0230202
PA14_07450	-1.18615	5.71031	68.6673	5.44474e-07	6.41102e-06
PA14_49020	-1.1858	6.50354	52.7991	2.70725e-06	2.15351e-05
guaB	1.18547	8.599	58.256	1.49913e-06	1.37576e-05
PA14_34420	1.18518	3.96765	27.4586	9.8797e-05	0.000405394
PA14_34300	1.18469	2.10514	2.41039	0.141309	0.206555
PA14_33050	1.18453	5.47158	42.3806	9.70804e-06	5.83264e-05
pilH	-1.18441	7.54751	64.6412	7.92699e-07	8.82785e-06
proB	1.18425	7.45126	44.6101	7.24834e-06	4.59911e-05
PA14_01470	1.1841	4.32258	16.7015	0.000966245	0.00281648
PA14_37690	-1.18366	7.7774	74.2561	3.32859e-07	4.46661e-06
spuB	-1.1836	7.7538	12.5027	0.00298191	0.00749315
PA14_58690	-1.18315	9.67911	47.159	5.25997e-06	3.53712e-05
PA14_56730	1.18277	5.61599	55.4984	2.0092e-06	1.71501e-05
crc	-1.18227	8.43038	133.393	7.03559e-09	2.93554e-07
narG	-1.18198	6.05793	36.2137	2.32477e-05	0.000119715
PA14_43100	-1.18168	8.55063	81.6611	1.81584e-07	2.86091e-06
PA14_51560	-1.18168	6.30099	82.236	1.73582e-07	2.77266e-06
PA14_22720	1.18161	3.85666	29.1369	7.31903e-05	0.00031645
PA14_23210	1.18145	5.2969	56.5713	1.79039e-06	1.56869e-05
lepB	-1.18101	8.57828	53.231	2.57904e-06	2.07367e-05
PA14_03220	-1.18096	6.68868	51.7526	3.04898e-06	2.36534e-05
PA14_44430	-1.18001	6.15004	23.6039	0.000206812	0.000755018
glpD	-1.17948	10.2779	41.7743	1.05321e-05	6.2314e-05
PA14_21440	-1.17909	6.70996	45.9959	6.0784e-06	3.99725e-05
PA14_48310	1.17891	3.45068	23.4968	0.000211328	0.000768675
thrS	1.17889	9.67596	52.3052	2.86279e-06	2.25317e-05
PA14_38920	-1.17881	0.272096	1.23749	0.283413	0.370871
PA14_12310	-1.1786	5.85369	9.46759	0.00764723	0.0168999
PA14_12730	1.17837	3.06773	12.5357	0.00295347	0.00744365
PA14_20920	1.17815	5.27423	19.5651	0.000489905	0.00156843
PA14_72650	1.17759	6.00477	83.8647	1.53e-07	2.54629e-06
PA14_32780	1.17753	3.99357	12.2336	0.00322575	0.00801461
PA14_07780	-1.1775	6.61672	76.0347	2.86471e-07	3.96929e-06
rrmA	1.1769	4.00423	32.6565	4.04735e-05	0.000192451
modA	-1.17678	6.08351	65.3235	7.42818e-07	8.33467e-06
PA14_71320	-1.17661	4.10502	27.876	9.15897e-05	0.000379436
xylS	1.17545	3.99247	20.0085	0.000443382	0.00143882
PA14_56560	-1.1754	5.7494	12.537	0.00295234	0.00744365
PA14_54040	1.17495	6.87173	50.3276	3.5958e-06	2.68776e-05
rplW	1.17492	8.83687	16.8258	0.000936919	0.00274443
phhC	1.17465	8.82092	55.0014	2.12072e-06	1.78782e-05
PA14_19065	1.17412	6.63308	53.9713	2.37495e-06	1.94635e-05
PA14_35470	-1.17363	4.94573	29.9159	6.39316e-05	0.000281526
PA14_32460	-1.17313	4.03147	8.0413	0.012493	0.025845
PA14_58970	-1.1728	3.11558	10.1261	0.00616572	0.014038
kdgA	1.17206	4.98378	53.7293	2.43958e-06	1.98566e-05
PA14_04300	-1.17205	10.0439	33.0137	3.82088e-05	0.00018285
gcd	1.17181	7.1464	93.6102	7.49273e-08	1.50309e-06
PA14_68400	-1.17167	11.1619	33.5033	3.53352e-05	0.000171719
mexB	1.17166	9.9099	41.8108	1.04803e-05	6.20689e-05
PA14_06790	-1.17074	4.22624	18.4802	0.000629028	0.00195399
PA14_08130	1.17043	5.13358	24.0798	0.000188015	0.000695773
PA14_29440	1.17	3.16848	14.5286	0.00169363	0.00459584
PA14_35740	-1.16993	8.39165	87.9296	1.12659e-07	2.07168e-06
PA14_64920	-1.16966	8.67883	79.1795	2.21275e-07	3.31245e-06
PA14_04970	1.16917	3.61172	18.4594	0.00063211	0.00196151
PA14_70880	-1.16864	13.7578	3.35622	0.0868182	0.136301
PA14_14330	-1.16814	1.6994	3.10488	0.098355	0.151592
PA14_59490	-1.16806	3.9938	29.3598	7.03936e-05	0.000305244
PA14_47070	-1.16744	0.19893	1.10861	0.331896	0.42271
PA14_24440	-1.16588	5.21533	56.5439	1.79564e-06	1.57099e-05
PA14_53620	-1.16548	5.34667	35.8856	2.44263e-05	0.00012492
prpD	1.16512	6.06413	48.0063	4.74221e-06	3.27015e-05
PA14_36980	1.16437	7.31789	22.0926	0.000282262	0.000981904
PA14_04370	-1.16425	4.98997	16.0955	0.00112509	0.00320886
rimK	-1.16387	6.06099	80.4481	1.99876e-07	3.05349e-06
purL	1.16337	8.53398	87.7713	1.13984e-07	2.0896e-06
livG	1.16278	5.81442	36.5704	2.20392e-05	0.000114481
PA14_30070	-1.1624	6.47267	60.6142	1.17728e-06	1.15746e-05
PA14_60030	-1.16201	8.5546	36.9951	2.06921e-05	0.000108049
PA14_59090	-1.16167	5.73613	63.8892	8.52133e-07	9.29855e-06
PA14_71740	1.16097	8.31505	59.5074	1.31741e-06	1.25613e-05
PA14_25440	-1.15954	6.58771	12.9259	0.00263967	0.00677018
aphA	1.15798	4.54088	17.0803	0.000879959	0.00260706
glyA	1.15787	7.31602	65.8617	7.05977e-07	8.02712e-06
PA14_03210	-1.15782	4.41565	18.9589	0.000562739	0.00177397
PA14_32570	1.15748	4.05731	17.1489	0.000865287	0.00256742
PA14_47230	-1.15747	4.43434	37.624	1.88651e-05	0.000100806
pheT	1.15732	8.10712	61.5999	1.06658e-06	1.09e-05
PA14_37360	1.15577	2.6039	6.93231	0.0187854	0.0365285
PA14_43840	1.15516	6.31869	29.7449	6.58436e-05	0.000288878
potD	-1.15505	4.14151	28.5979	8.04866e-05	0.000343509
PA14_08460	1.15452	6.107	46.1425	5.96763e-06	3.93745e-05
purM	1.1545	7.16588	45.0927	6.81411e-06	4.37955e-05
nosD	-1.15425	6.04049	22.7471	0.000246293	0.00087398
PA14_24830	1.15413	3.09104	26.43	0.000119475	0.000473295
PA14_61180	-1.15383	3.90659	14.4369	0.00173595	0.0046821
PA14_00510	-1.15373	6.8117	55.5348	2.00131e-06	1.71073e-05
cysI	-1.1532	8.12775	28.278	8.52061e-05	0.000358263
PA14_08600	-1.15277	13.7646	3.24508	0.0917082	0.1427
PA14_69760	-1.15191	4.49628	39.8117	1.37965e-05	7.79881e-05
PA14_30350	-1.15132	6.05122	70.7915	4.49872e-07	5.56461e-06
PA14_20250	-1.15104	1.92297	8.19842	0.0118146	0.024621
PA14_44160	1.15018	6.42504	59.7469	1.28556e-06	1.23305e-05
PA14_22580	1.14989	4.26306	24.9572	0.000158218	0.000601189
orfE	-1.1496	8.72874	8.75237	0.00973832	0.0208334
pilZ	-1.14909	6.5313	48.7508	4.33459e-06	3.05266e-05
PA14_13690	1.14872	4.4666	22.5799	0.00025496	0.000898314
PA14_33780	-1.14837	7.00013	79.4855	2.15886e-07	3.25632e-06
PA14_09320	-1.14824	5.78511	5.00377	0.0408516	0.0718188
PA14_38770	1.14763	4.86166	28.094	8.8063e-05	0.000368196
gcvP2	1.14726	7.35748	31.9365	4.55157e-05	0.000212859
PA14_16830	1.1472	5.72624	39.5242	1.43649e-05	8.05897e-05
PA14_02390	-1.14674	5.36684	14.0507	0.00192777	0.00513671
PA14_59510	-1.14557	2.16391	2.49081	0.135301	0.199289
PA14_17880	1.14498	1.93878	7.06418	0.0178721	0.0350154
oprN	1.14452	3.19901	3.76123	0.0714389	0.115756
PA14_26640	1.14352	7.53175	23.9969	0.000191144	0.000704724
PA14_24780	1.14317	5.23995	36.8398	2.11736e-05	0.000110177
eco	-1.14201	8.07351	57.8046	1.57153e-06	1.42514e-05
PA14_27570	1.14112	4.84478	34.7627	2.90036e-05	0.000144364
gltA	1.14094	9.9498	25.9672	0.00013035	0.000509932
PA14_57920	-1.14001	8.03559	59.2598	1.35128e-06	1.27846e-05
pchA	-1.13959	6.71186	21.9109	0.000293276	0.00101472
PA14_36080	1.13954	2.16639	4.80676	0.0444812	0.0769956
PA14_01150	-1.13886	4.31362	12.1877	0.00326963	0.00811347
PA14_31510	1.13816	6.15979	19.4771	0.000499776	0.0015966
PA14_44380	1.13717	7.25075	17.2766	0.000838712	0.00249727
PA14_36400	1.137	3.77151	10.5575	0.00537347	0.0124888
secY	1.13663	11.3499	33.2167	3.69861e-05	0.000177856
PA14_38220	-1.13643	5.49701	32.7648	3.97707e-05	0.000189485
PA14_58990	-1.13529	3.97894	24.6886	0.000166729	0.000626733
PA14_71170	1.13487	3.55424	17.0745	0.000881218	0.0026082
znuC	-1.13451	4.87138	11.4077	0.00412893	0.00993945
fabD	1.13384	8.47813	15.5966	0.0012784	0.00359227
PA14_16990	1.13354	5.78004	22.8265	0.000242293	0.000862877
PA14_19950	-1.13298	5.86942	37.3846	1.95383e-05	0.000103475
rplR	1.13295	9.60428	23.6291	0.000205763	0.000751648
PA14_48850	-1.13107	4.33622	30.5509	5.73611e-05	0.000257541
PA14_53390	1.13055	4.96433	35.1788	2.72026e-05	0.000136511
PA14_45210	1.13012	3.07434	17.0745	0.000881201	0.0026082
PA14_52110	-1.12872	5.65199	24.8365	0.00016198	0.000614307
pscI	-1.12844	2.00897	2.58665	0.128544	0.190799
PA14_40780	-1.12768	5.71826	20.6062	0.000388414	0.00128995
PA14_37650	1.12768	4.48605	33.2931	3.65375e-05	0.000176125
PA14_44690	-1.12733	6.55419	37.0783	2.04391e-05	0.000107103
pilX	-1.12626	6.91237	91.2235	8.86936e-08	1.73258e-06
PA14_54340	-1.12552	7.82718	83.7632	1.54198e-07	2.55198e-06
PA14_54510	1.12501	4.15876	27.7277	9.40785e-05	0.000388171
PA14_14280	1.125	6.01786	43.6351	8.22468e-06	5.07274e-05
PA14_47040	-1.12317	5.15546	36.4554	2.2421e-05	0.000115959
PA14_00700	1.12244	2.54991	6.42203	0.0228646	0.0431373
PA14_66880	-1.12233	8.58743	50.7543	3.42118e-06	2.59661e-05
pvcC	1.12228	3.1533	17.8694	0.000726881	0.00219612
rubA1	-1.12212	6.03715	20.9654	0.000359111	0.00120201
PA14_34850	1.12202	4.01431	27.178	0.000104003	0.000422105
rplI	1.12152	9.46405	33.3584	3.61589e-05	0.000174582
PA14_32420	1.12141	7.04135	62.173	1.00766e-06	1.0595e-05
PA14_27520	-1.12119	6.86411	12.0052	0.00345072	0.00852734
PA14_56620	-1.12105	4.00527	24.5774	0.000170404	0.000638533
argD	1.12089	8.17856	35.7475	2.49425e-05	0.000127341
groES	-1.12083	8.50467	23.671	0.000204036	0.000746711
glpF	-1.12072	9.04681	38.6201	1.63334e-05	8.96909e-05
rfaD	1.12071	7.35129	31.6279	4.7892e-05	0.000221882
PA14_59070	-1.12063	6.46929	76.9299	2.65927e-07	3.73678e-06
PA14_01870	-1.12046	3.87573	13.535	0.00222278	0.00580847
PA14_13580	1.11988	6.21706	8.84415	0.00943639	0.0202821
PA14_59920	-1.11959	4.62598	57.7355	1.58295e-06	1.42897e-05
PA14_57970	-1.1192	8.27426	21.2062	0.000340879	0.00115068
trmD	1.11874	8.92684	29.1106	7.35278e-05	0.000317448
PA14_12370	-1.11843	7.52429	83.7655	1.54171e-07	2.55198e-06
PA14_39520	1.11784	7.52493	24.6269	0.000168757	0.00063276
PA14_31820	1.11773	4.28989	7.4816	0.015301	0.0307676
PA14_17600	-1.11769	5.07485	8.38293	0.0110712	0.0232262
tpm	1.11503	4.8891	28.2481	8.56627e-05	0.000359928
PA14_47530	1.11457	5.38584	24.7805	0.000163761	0.000617978
PA14_21180	1.11345	4.96678	50.3178	3.59992e-06	2.68776e-05
PA14_59430	-1.11335	2.22644	6.89899	0.0190246	0.0369093
modB	-1.11214	4.98268	37.5143	1.91703e-05	0.000102253
purK	1.112	6.39822	50.3494	3.58663e-06	2.68456e-05
pbpA	-1.11194	6.62482	21.6207	0.000311905	0.00106617
pcaD	1.11163	3.67704	13.1405	0.00248337	0.00640517
PA14_04660	-1.11111	5.05243	18.9743	0.000560746	0.00176938
PA14_26560	1.11109	6.06618	60.0544	1.24592e-06	1.21059e-05
PA14_33980	-1.11027	3.8998	20.9427	0.000360893	0.00120662
PA14_43600	1.10992	6.14507	68.0076	5.78302e-07	6.75435e-06
PA14_57900	-1.1099	6.95962	51.1659	3.26181e-06	2.50035e-05
PA14_58060	-1.10983	7.28979	86.918	1.21436e-07	2.18584e-06
PA14_26940	1.10974	4.97771	19.6959	0.000475624	0.00152929
PA14_45910	1.10938	3.54584	20.7632	0.000375282	0.00125122
PA14_34050	1.10925	6.01308	8.08094	0.0123178	0.0255001
PA14_31430	-1.1092	6.20569	47.8466	4.83523e-06	3.30094e-05
fusA1	1.10907	12.0524	11.4368	0.00409259	0.00987193
PA14_71120	1.10853	0.84279	1.12861	0.304827	0.393789
PA14_11590	-1.10797	4.21289	38.5751	1.64391e-05	9.01882e-05
metR	1.10736	5.23481	48.9816	4.21643e-06	2.99325e-05
PA14_44880	1.10644	6.59689	63.3375	8.98947e-07	9.75578e-06
PA14_22980	-1.10537	10.2879	13.6769	0.00213676	0.0056157
PA14_50950	-1.10492	5.63806	24.3933	0.000176691	0.000658778
PA14_29040	1.10435	1.84198	2.15989	0.162253	0.231935
PA14_03200	-1.10422	6.86681	85.869	1.31363e-07	2.31276e-06
PA14_40020	1.10354	5.48975	35.7329	2.49977e-05	0.000127514
trxB2	1.10342	8.28735	18.7765	0.000587022	0.00184175
rpsE	1.10342	10.3782	22.9158	0.000237885	0.00085189
bioD	1.10319	3.85609	28.5596	8.10353e-05	0.000344617
PA14_48810	1.10292	5.63167	43.6177	8.24349e-06	5.07908e-05
PA14_18370	1.10278	3.8959	6.64244	0.0209886	0.0401573
pssA	-1.10234	7.85006	62.2361	1.0014e-06	1.05706e-05
nusB	1.10139	6.5534	32.2052	4.35546e-05	0.000205462
PA14_46110	1.10085	4.91048	15.1998	0.00141741	0.00391876
PA14_58960	-1.10084	3.5841	20.1573	0.000428917	0.00140411
PA14_18650	-1.10073	9.52946	52.0352	2.95209e-06	2.31125e-05
sodM	-1.1004	6.1538	18.7247	0.000594133	0.00186112
pilM2	-1.1003	4.66341	21.2154	0.000340207	0.00114907
PA14_43620	1.09952	4.73667	21.0697	0.00035108	0.0011811
PA14_35060	-1.09919	2.37106	2.63022	0.125609	0.187001
PA14_19190	1.09861	7.05851	84.3595	1.47305e-07	2.48507e-06
PA14_13170	-1.09839	6.21697	59.5053	1.3177e-06	1.25613e-05
PA14_59210	-1.09757	5.36212	39.9863	1.34636e-05	7.652e-05
PA14_16260	1.09756	8.70547	31.2364	5.11127e-05	0.000234073
dsdA	1.09711	4.96352	33.2271	3.69246e-05	0.000177703
PA14_16770	1.09694	4.80001	22.1112	0.00028116	0.000979048
PA14_23670	1.0965	4.5074	15.523	0.00130298	0.00365152
PA14_08040	1.09596	4.18846	17.7945	0.000740028	0.00222906
PA14_37550	1.09548	1.12527	1.54463	0.23295	0.314506
PA14_45190	1.09533	4.21146	16.1461	0.00111076	0.00317103
PA14_27450	1.09532	2.71143	9.18344	0.00840953	0.0183464
PA14_35780	-1.09529	9.57245	31.1382	5.19584e-05	0.000236854
aruF	1.09461	7.27942	25.2973	0.000148143	0.000566882
PA14_63420	1.09341	0.717273	0.889087	0.360619	0.452616
PA14_39750	-1.09334	3.96589	20.8136	0.000371179	0.00123893
PA14_46250	-1.09334	3.7223	15.8169	0.00120796	0.00341414
PA14_55220	1.09319	4.19602	17.4706	0.000800084	0.00239062
PA14_44800	1.09307	5.52586	41.2966	1.12374e-05	6.59627e-05
PA14_49780	1.09267	3.23368	8.88393	0.00930882	0.0200513
PA14_02130	1.09229	2.21754	2.17534	0.160854	0.230338
PA14_33900	1.09159	6.45305	43.2395	8.6628e-06	5.2828e-05
mgtE	1.09061	8.43673	31.1191	5.21248e-05	0.000237431
PA14_20760	1.09044	8.33838	54.9981	2.12149e-06	1.78782e-05
PA14_00630	-1.08961	6.21349	40.4056	1.2701e-05	7.31841e-05
PA14_43240	1.08948	4.5743	30.3246	5.96102e-05	0.000265867
PA14_56300	1.08915	7.09382	71.8727	4.0897e-07	5.18335e-06
PA14_49700	-1.08905	4.49431	16.6167	0.000986865	0.00286398
amiB	-1.08896	8.03794	61.5042	1.07679e-06	1.09855e-05
PA14_32720	-1.08874	3.89327	18.9933	0.000558296	0.00176276
rcsC	-1.08868	8.46836	73.1296	3.66627e-07	4.75867e-06
glpT	-1.0886	7.27971	61.3156	1.09724e-06	1.10991e-05
atpH	1.0886	8.30277	11.6995	0.00378042	0.00922349
PA14_14010	1.08834	3.46016	11.5174	0.00399372	0.00968441
nqrE	1.08815	5.45363	42.3618	9.73243e-06	5.83946e-05
PA14_13870	-1.08796	3.9837	15.6048	0.00127569	0.00358686
PA14_40800	1.08746	3.80675	14.4375	0.00173564	0.0046821
PA14_33550	1.08706	3.94625	14.9372	0.00151889	0.00416454
PA14_09700	1.08677	6.26224	74.7578	3.18965e-07	4.31646e-06
lipH	1.08573	3.739	13.3748	0.00232465	0.00603761
PA14_13070	1.08509	4.02246	24.1936	0.000183811	0.00068191
PA14_42380	-1.0849	5.06409	56.3232	1.83848e-06	1.60207e-05
PA14_02090	-1.08473	6.16937	53.4176	2.52578e-06	2.04187e-05
PA14_46120	1.08424	3.92965	20.0811	0.000436252	0.00142032
PA14_48890	-1.08423	4.92311	31.9078	4.57311e-05	0.000213531
PA14_14975	1.08297	5.35708	13.0545	0.00254472	0.00655205
PA14_59130	-1.08272	4.4956	22.8463	0.000241312	0.000860919
PA14_08150	1.08272	4.96057	21.2213	0.000339771	0.00114824
PA14_65840	1.08256	2.31826	3.74795	0.0718892	0.11639
dapE	1.08252	5.36681	32.0259	4.48521e-05	0.000210251
PA14_31480	1.08251	5.81767	44.4109	7.43655e-06	4.67741e-05
PA14_17520	1.08144	4.77549	54.8071	2.16622e-06	1.81002e-05
PA14_13860	-1.0813	2.23273	3.06782	0.100208	0.154034
eutB	1.08108	6.36551	55.8198	1.94062e-06	1.67569e-05
PA14_22660	-1.08087	5.72624	16.8636	0.000928192	0.00272422
PA14_52370	-1.08026	6.82964	61.7408	1.05174e-06	1.08746e-05
PA14_32600	1.08022	3.96868	19.7624	0.000468555	0.00150929
cobM	1.07995	3.55332	24.7392	0.000165088	0.00062174
algD	1.07988	5.96157	8.99092	0.0089755	0.0194529
infB	1.07973	11.6183	27.9526	9.03321e-05	0.000375837
PA14_28780	-1.07932	5.39121	38.8826	1.57321e-05	8.69496e-05
PA14_08570	-1.07893	12.0285	0.973074	0.339512	0.430454
PA14_23610	1.07851	3.68662	6.33423	0.0236653	0.044521
nadE	1.07843	5.4316	31.5708	4.83475e-05	0.000223471
PA14_41030	1.07693	5.63877	59.7734	1.28208e-06	1.23305e-05
PA14_19210	1.07599	4.094	27.0978	0.000105548	0.000427791
pilN	-1.07594	6.38774	36.948	2.08367e-05	0.000108614
PA14_31450	-1.07577	5.48004	37.8936	1.81387e-05	9.79788e-05
PA14_19960	-1.07574	2.88875	9.99498	0.00643247	0.0145389
PA14_34030	1.07511	3.78653	5.46395	0.0336381	0.0606953
cycB	-1.07496	8.66069	80.4853	1.99284e-07	3.05349e-06
fxsA	-1.07494	6.58781	14.5524	0.00168284	0.00457199
PA14_38260	-1.07487	3.42767	16.2614	0.00107885	0.00310372
PA14_01060	-1.07463	2.13804	1.72651	0.208538	0.28668
PA14_46570	-1.07417	5.82348	49.8477	3.80434e-06	2.78113e-05
PA14_32330	-1.0732	6.35947	39.0157	1.54367e-05	8.56347e-05
PA14_38560	1.07285	4.6028	18.9308	0.000566414	0.00178461
alc	1.07262	6.04509	61.6476	1.06152e-06	1.08746e-05
PA14_52330	-1.07166	5.78007	25.4332	0.000144319	0.000554743
pilT2	-1.07162	4.43933	48.5754	4.42695e-06	3.09212e-05
PA14_46340	1.0716	4.25196	22.1344	0.000279794	0.000974861
aroK	-1.07152	7.73954	81.7806	1.79886e-07	2.85803e-06
PA14_54690	1.07128	4.25373	19.6114	0.000484788	0.00155372
PA14_51190	1.07125	4.6111	33.3694	3.6096e-05	0.000174576
PA14_03190	-1.07121	7.39154	74.3638	3.29818e-07	4.43579e-06
PA14_58350	1.07114	9.08336	48.7597	4.32998e-06	3.05266e-05
PA14_69010	1.07098	5.6687	39.1686	1.51052e-05	8.41092e-05
PA14_60050	-1.07091	6.35202	81.7272	1.80642e-07	2.86091e-06
PA14_40210	-1.07086	4.43887	23.6404	0.000205296	0.000750863
PA14_28810	-1.0705	9.45801	59.7528	1.28478e-06	1.23305e-05
PA14_30860	1.06941	1.53141	1.95509	0.18231	0.255698
PA14_16300	1.0693	1.45764	1.17501	0.295438	0.383741
PA14_44440	-1.06905	5.32041	10.9009	0.00482535	0.0113859
PA14_22110	-1.06799	4.94447	13.449	0.00227681	0.00592627
PA14_50940	-1.0673	6.33131	29.1257	7.33336e-05	0.000316839
cysW	-1.06699	4.90023	10.4929	0.00548423	0.0127151
oprJ	-1.06681	3.51887	7.01345	0.0182173	0.0356097
PA14_22120	-1.06568	6.01824	35.2986	2.67078e-05	0.000134624
nuoD	1.06526	8.03544	27.9768	8.99383e-05	0.00037446
PA14_72810	-1.06512	5.98706	49.1342	4.14025e-06	2.95421e-05
pqsB	1.06505	8.21298	16.7787	0.000947918	0.00277376
accB	1.06413	8.1622	16.2025	0.001095	0.00313204
PA14_09940	1.06334	7.13217	24.6296	0.000168666	0.00063276
PA14_03730	-1.06322	9.31343	84.9908	1.40385e-07	2.3966e-06
PA14_44680	-1.06314	8.7133	31.7149	4.72079e-05	0.000219395
PA14_41430	1.06297	4.79744	31.9122	4.56982e-05	0.000213531
PA14_03390	-1.06291	4.87103	24.4224	0.000175682	0.000655424
PA14_25990	1.06185	4.94122	20.2631	0.000418949	0.0013745
fdxA	-1.06182	7.98507	41.2188	1.13573e-05	6.634e-05
PA14_57840	-1.0617	7.47025	51.3049	3.2099e-06	2.46451e-05
gapA	-1.06139	7.43728	65.7028	7.16632e-07	8.10189e-06
PA14_03265	-1.06132	5.58211	45.5324	6.444e-06	4.20519e-05
PA14_31740	1.06073	2.08138	7.25882	0.0166159	0.0329998
yqgF	-1.05996	4.05094	5.0003	0.0409125	0.0719046
PA14_46900	-1.05937	1.15105	2.5097	0.133936	0.197669
PA14_31470	1.05892	7.42595	37.6983	1.86616e-05	0.000100077
PA14_23810	1.05872	5.60795	19.6674	0.000478696	0.00153585
PA14_28820	-1.05808	8.876	37.4072	1.94735e-05	0.000103223
PA14_26450	1.05685	2.56104	8.6883	0.00995569	0.0212222
PA14_10970	-1.05671	2.33117	2.56457	0.130063	0.192717
PA14_61530	-1.05476	4.61505	17.8185	0.000735784	0.0022174
napD	-1.05464	4.60863	19.8837	0.000455949	0.00147558
xdhB	1.05424	7.55512	48.4584	4.48975e-06	3.12134e-05
PA14_20460	-1.05389	4.14471	5.15976	0.0382212	0.0677946
ureD	1.05382	2.24232	1.46483	0.244833	0.328627
PA14_35890	1.05368	4.65453	31.3151	5.04457e-05	0.000231731
PA14_31080	1.05348	0.737097	1.45223	0.246781	0.330633
benD	1.05321	2.00951	4.59477	0.0488149	0.0834737
PA14_47120	1.05317	9.71133	13.5961	0.00218527	0.00573308
PA14_61270	-1.05242	4.48973	22.4464	0.00026213	0.000920856
PA14_38110	1.05226	6.77329	28.6588	7.96226e-05	0.000340309
PA14_53650	-1.0522	5.22615	30.5323	5.75421e-05	0.000258159
PA14_61010	-1.05116	8.98945	16.8964	0.000920697	0.00271278
PA14_71190	1.05011	1.16343	1.04164	0.32357	0.413809
PA14_46510	-1.04933	7.98345	71.0346	4.40286e-07	5.48792e-06
leuD	1.04922	6.35232	26.6997	0.000113613	0.00045278
PA14_03380	-1.04872	7.74513	85.0554	1.39698e-07	2.39199e-06
PA14_28830	-1.04857	7.8796	30.7457	5.5501e-05	0.000250511
PA14_04860	1.04772	5.40501	34.6089	2.97032e-05	0.000147476
PA14_14570	-1.04768	1.89008	5.59578	0.0318523	0.0577705
PA14_62660	-1.04741	6.11026	20.2526	0.000419929	0.00137636
PA14_58950	-1.0461	2.72277	2.67868	0.122439	0.18283
PA14_72990	-1.04606	5.19472	20.0936	0.000435045	0.00142032
PA14_07630	-1.04597	4.00733	15.7585	0.00122619	0.0034624
PA14_30360	-1.04579	6.94515	26.7544	0.000112466	0.000449109
PA14_47360	1.04574	5.53868	42.8292	9.14529e-06	5.54299e-05
PA14_24880	-1.04537	10.6795	31.5788	4.82829e-05	0.000223346
PA14_02690	-1.04532	3.43031	12.9992	0.00258503	0.00664436
PA14_26870	-1.04483	3.85682	15.823	0.00120608	0.00341046
PA14_37530	1.04441	1.78999	3.583	0.0777707	0.124003
PA14_44120	1.04405	6.30846	58.2854	1.49454e-06	1.37576e-05
adk	1.04404	8.87287	60.3806	1.20539e-06	1.17808e-05
PA14_07500	-1.04401	7.83876	47.9189	4.79286e-06	3.29744e-05
nqrA	1.04331	7.35911	63.9316	8.48651e-07	9.27755e-06
np20	-1.04289	5.26457	29.4328	6.95041e-05	0.000302267
PA14_44100	1.04237	4.534	20.5694	0.000391566	0.00129897
PA14_08240	1.04159	6.20846	12.961	0.00261338	0.00670855
PA14_70330	-1.04136	4.28325	15.6592	0.00125792	0.0035436
PA14_43730	-1.04059	4.36073	9.04096	0.00882431	0.0191461
pslI	1.04041	3.14852	10.6175	0.00527264	0.0122905
braZ	1.03883	4.31601	30.0279	6.27134e-05	0.00027698
dapD	1.03882	5.81425	29.5496	6.81082e-05	0.000296938
PA14_38395	1.03868	2.67072	12.277	0.00318492	0.00792638
PA14_12030	-1.03788	6.56354	40.4616	1.26028e-05	7.27594e-05
PA14_08330	-1.03786	5.35845	54.0385	2.35734e-06	1.93996e-05
cupB6	-1.03743	4.22324	23.2475	0.000222289	0.000804126
PA14_01520	-1.03613	4.24076	6.29054	0.0240758	0.0452361
PA14_12420	-1.03585	8.10262	62.0962	1.01533e-06	1.06502e-05
PA14_02260	-1.0358	7.86051	88.1093	1.11177e-07	2.05712e-06
ppk	-1.03528	8.20273	39.5379	1.43372e-05	8.05101e-05
proA	1.03521	6.42985	30.4742	5.81117e-05	0.000260519
PA14_65950	-1.03458	3.9385	18.9976	0.000557747	0.00176196
PA14_03270	-1.03361	7.49321	58.3194	1.48927e-06	1.37576e-05
PA14_59110	-1.03358	3.6194	26.1776	0.000125273	0.000492333
PA14_16620	1.03305	5.72144	10.1875	0.00604519	0.0137997
PA14_01310	1.03275	6.3005	39.6037	1.42052e-05	7.98441e-05
PA14_15610	-1.03255	8.22063	85.3405	1.36711e-07	2.35572e-06
PA14_02530	-1.03191	6.66038	5.45045	0.0338274	0.060963
PA14_31920	1.03181	5.26122	23.6725	0.000203973	0.000746711
PA14_15160	1.03171	2.7915	4.81739	0.0442759	0.0766847
PA14_48980	1.03133	2.24469	8.8023	0.00957272	0.0205603
PA14_54830	-1.0313	7.4239	28.1132	8.77599e-05	0.000367187
PA14_67940	1.03127	1.62611	1.57501	0.228623	0.309999
PA14_40860	1.03108	10.6502	22.6735	0.000250064	0.000884201
PA14_26980	-1.03091	6.3351	38.096	1.76139e-05	9.57328e-05
moaB1	-1.03045	4.39074	3.10469	0.0983645	0.151592
PA14_26330	-1.03039	3.8036	13.7748	0.00207962	0.00549219
PA14_29180	1.0302	4.35742	20.4653	0.000400633	0.00132249
PA14_06600	1.02918	10.4151	17.4368	0.00080667	0.0024069
folA	1.02781	3.86196	28.5185	8.16298e-05	0.000346403
PA14_57200	1.02755	6.08053	54.0642	2.35065e-06	1.93996e-05
PA14_36090	1.0275	2.58574	5.62857	0.0314255	0.0570834
cupA2	1.02742	1.33536	3.6265	0.0966938	0.149404
PA14_33300	-1.02725	5.43452	31.0515	5.27185e-05	0.000239952
PA14_18340	1.02652	1.91359	2.32313	0.148203	0.214801
PA14_60180	-1.02606	1.64511	0.889299	0.360563	0.452616
mltB1	-1.02559	6.65547	26.4144	0.000119824	0.000474046
glcD	-1.02517	4.99907	7.50313	0.0151804	0.030566
gltS	1.02491	3.05613	16.665	0.00097506	0.00283801
PA14_65090	1.0247	6.95631	10.0429	0.0063335	0.0143588
PA14_66140	-1.02456	6.3106	13.7284	0.00210647	0.00555079
PA14_11860	-1.02428	5.87087	46.2707	5.87271e-06	3.88773e-05
cupA5	1.02411	0.771559	1.27326	0.404502	0.495991
PA14_59390	-1.02401	6.62484	19.3063	0.000519597	0.00165283
msbA	-1.02398	7.71945	24.8563	0.000161358	0.000612339
PA14_65470	1.02342	7.01621	56.3057	1.84193e-06	1.60207e-05
PA14_13680	1.02324	3.84033	12.9131	0.00264933	0.00679191
secB	-1.02324	8.1247	62.2258	1.00242e-06	1.05706e-05
PA14_69040	-1.02307	6.36655	52.2797	2.87109e-06	2.25672e-05
PA14_00150	-1.0222	3.76339	12.5267	0.00296118	0.00745678
spcU	-1.02219	6.9283	75.6921	2.94804e-07	4.07527e-06
cynS	1.02204	2.62139	14.7591	0.00210915	0.0055516
tolA	-1.02075	9.37608	48.8429	4.28699e-06	3.02629e-05
PA14_68570	-1.02067	6.12136	21.6147	0.000312303	0.00106692
PA14_38340	-1.02043	6.43258	38.0783	1.76592e-05	9.58226e-05
PA14_33890	-1.01832	5.28417	14.8181	0.00156759	0.00428623
PA14_15600	-1.01811	7.13049	30.659	5.63198e-05	0.000253613
PA14_53450	-1.01773	4.16879	23.8969	0.000194997	0.000716273
oprH	-1.01705	5.14718	28.777	7.79739e-05	0.000334945
PA14_40960	1.01691	7.30688	78.9062	2.26218e-07	3.37796e-06
PA14_04690	-1.01685	6.71765	75.3453	3.0352e-07	4.17638e-06
PA14_24245	-1.01663	5.07826	11.45	0.00407628	0.00984454
PA14_61610	-1.01647	5.9962	5.04044	0.0402148	0.0707909
PA14_67710	-1.01645	4.62014	39.182	1.50766e-05	8.40282e-05
PA14_54620	1.01534	7.75106	23.2797	0.000220838	0.000799362
pqsE	1.01532	7.43668	9.31019	0.00805922	0.0176923
PA14_05060	-1.0149	6.616	45.4537	6.50858e-06	4.2242e-05
cobU	1.01457	1.96844	3.3044	0.0890583	0.139268
PA14_43180	1.01438	4.46958	15.5622	0.00128983	0.00361978
PA14_60540	-1.01359	5.97418	38.8156	1.58832e-05	8.76752e-05
nosZ	-1.01353	8.1712	23.5721	0.000208142	0.00075894
PA14_65570	-1.01336	7.73621	26.0825	0.000127538	0.000499915
PA14_47440	1.01322	6.47389	30.3239	5.96171e-05	0.000265867
PA14_24970	1.01285	6.74637	39.9667	1.35005e-05	7.66055e-05
rplB	1.01269	10.3738	15.6882	0.00124856	0.00352222
cobB	1.01258	3.75345	18.2683	0.000661169	0.00202949
PA14_29330	-1.01217	6.5912	52.8734	2.68467e-06	2.14127e-05
hemE	1.01213	5.17253	35.3777	2.63867e-05	0.000133357
PA14_44450	-1.01201	3.886	16.6344	0.000982517	0.00285692
hflC	-1.01187	9.23872	30.7791	5.51897e-05	0.000249673
PA14_64840	1.01182	5.03278	27.6118	9.6079e-05	0.000395604
pqqE	1.0116	5.57954	30.7615	5.53533e-05	0.000250224
PA14_21860	-1.01139	4.40102	25.7997	0.000134559	0.000523305
PA14_45020	1.01112	3.0154	8.99516	0.00896258	0.019432
PA14_13420	-1.01097	6.29349	56.7025	1.76554e-06	1.55378e-05
PA14_08220	1.00996	4.34566	8.64354	0.0101108	0.0214991
PA14_69340	-1.00948	7.05565	44.6289	7.23083e-06	4.59289e-05
ftsK	-1.00926	8.63161	50.2028	3.64875e-06	2.70389e-05
PA14_12180	-1.00916	4.79319	7.00741	0.0182588	0.0356675
PA14_58880	-1.00873	5.79496	59.2723	1.34955e-06	1.27846e-05
PA14_50320	-1.00836	5.87785	21.0269	0.000354353	0.00118742
PA14_38420	-1.00785	4.86445	38.6839	1.6185e-05	8.91006e-05
PA14_69060	-1.00681	6.66296	59.7338	1.28728e-06	1.23305e-05
nqrF	1.00663	6.61224	49.2153	4.10044e-06	2.93988e-05
PA14_72260	1.00652	9.48717	28.937	7.58047e-05	0.000326333
PA14_13890	-1.00647	4.57902	10.8984	0.004829	0.01139
rplV	1.0064	9.14981	18.4121	0.000639164	0.00197928
PA14_46290	1.00635	4.07659	16.4636	0.00102535	0.00296556
fabA	-1.0059	9.3193	25.6675	0.00013799	0.000534207
fruK	-1.00532	2.78446	12.0568	0.00339834	0.00841184
PA14_49360	-1.00463	5.6163	36.3363	2.28242e-05	0.000117835
nuh	1.00435	7.08943	64.253	8.22769e-07	9.05405e-06
PA14_35040	1.0041	2.51165	5.19211	0.0377008	0.0670512
PA14_70860	-1.00295	9.36379	14.5634	0.00167788	0.00456058
PA14_46930	1.00275	6.06455	38.3233	1.70452e-05	9.30847e-05
rplP	0.999636	9.27221	15.4993	0.00131101	0.00366886
PA14_72090	-0.99945	4.98226	24.0904	0.000187619	0.000694737
PA14_28150	0.997465	5.27618	29.6867	6.65095e-05	0.000291156
PA14_07010	-0.997399	2.90793	2.18073	0.160369	0.229793
phnA	0.996778	6.95452	10.1621	0.00609482	0.0139023
PA14_43230	0.994972	3.82949	17.4677	0.000800652	0.00239112
PA14_62790	-0.994792	4.00947	1.26162	0.278946	0.365995
PA14_30140	0.99457	4.75263	26.587	0.000116022	0.000461146
PA14_64790	-0.99423	1.3723	1.39012	0.256693	0.341456
PA14_54890	-0.993737	6.38635	21.4706	0.00032206	0.00109522
PA14_26190	0.993646	5.62637	21.0372	0.000353565	0.00118671
putP	0.993102	6.92221	28.3313	8.43989e-05	0.000355873
ppiA	-0.992519	6.72779	45.3989	6.55389e-06	4.24436e-05
repA	-0.991903	3.79785	5.13781	0.0385793	0.0682671
PA14_05200	-0.991894	5.96001	49.4286	3.99774e-06	2.88647e-05
PA14_23640	0.991083	5.81356	19.3242	0.000517488	0.00164789
PA14_15270	0.989891	1.66642	1.36545	0.260776	0.345882
sdhA	0.989317	9.30882	32.1086	4.42485e-05	0.000207936
PA14_15930	-0.98914	4.65459	43.1635	8.74993e-06	5.3229e-05
PA14_53550	0.988957	2.64034	5.73311	0.030108	0.0549919
PA14_34390	0.988506	2.83009	8.92148	0.00919026	0.019839
PA14_48450	0.988428	3.93073	13.3654	0.00233079	0.00605091
pctC	-0.988118	6.88363	24.7478	0.000164811	0.000621483
PA14_67100	0.988093	4.53996	6.22096	0.0247467	0.046284
PA14_08120	0.98608	6.66133	24.1974	0.000183671	0.000681814
PA14_71340	-0.985878	3.16044	6.74652	0.0201649	0.0388057
PA14_71720	0.985748	9.43706	34.3467	3.09404e-05	0.000153109
PA14_12850	-0.985373	5.10396	37.4691	1.92977e-05	0.000102749
PA14_15370	-0.98532	3.68465	8.90249	0.00925	0.0199463
PA14_12360	-0.985032	5.29098	25.5236	0.00014184	0.000546623
PA14_30260	-0.985011	7.38625	54.0231	2.36137e-06	1.93996e-05
PA14_00340	-0.984754	3.80525	4.54197	0.0499699	0.0851848
PA14_57850	-0.984408	6.61256	49.6864	3.8775e-06	2.82422e-05
PA14_29150	0.984221	5.49635	36.0546	2.38111e-05	0.000121984
PA14_00960	-0.983954	3.74618	9.20339	0.00835326	0.0182504
PA14_67400	-0.983029	7.62814	43.5143	8.35576e-06	5.13397e-05
PA14_36690	0.982922	6.11448	7.53642	0.0149961	0.0302255
PA14_05400	-0.982546	4.95379	29.9497	6.35614e-05	0.00028031
pilS	-0.981684	5.42996	45.5565	6.4244e-06	4.197e-05
PA14_21970	-0.981627	4.63212	13.7448	0.00209694	0.00553303
PA14_72960	-0.981516	6.84168	10.3214	0.00579167	0.0133025
purE	0.981462	6.49661	50.8249	3.39322e-06	2.57868e-05
ddlA	0.980545	6.55909	65.4278	7.3551e-07	8.28387e-06
PA14_28080	0.979992	1.21822	0.874465	0.364488	0.456318
PA14_66890	-0.97999	4.92275	12.6452	0.00286133	0.00724514
PA14_10470	0.979967	3.29901	12.299	0.00316447	0.00788206
PA14_17150	-0.979739	9.94533	57.0717	1.69766e-06	1.50532e-05
PA14_44910	-0.97906	7.62093	51.7285	3.05739e-06	2.36878e-05
PA14_07650	-0.979016	9.94491	49.5838	3.92485e-06	2.85347e-05
accC	0.979008	9.89913	22.8946	0.000238927	0.000854457
PA14_59010	-0.978889	2.33868	2.14352	0.163751	0.233584
PA14_48530	0.978788	6.93732	22.775	0.000244877	0.000870512
PA14_21290	-0.978178	4.29217	15.4511	0.0013275	0.0037063
PA14_15630	-0.977243	4.92435	13.5766	0.00219715	0.00576171
PA14_67280	0.976844	4.86718	22.7359	0.000246864	0.000874964
PA14_24330	0.97538	7.92516	42.3173	9.79058e-06	5.86844e-05
PA14_46820	0.974898	5.46493	23.355	0.000217487	0.000788193
PA14_16410	0.974756	6.03996	37.2353	1.99718e-05	0.000105302
PA14_47800	0.974078	5.18175	24.78	0.000163778	0.000617978
PA14_57740	-0.973623	6.24949	35.3806	2.6375e-05	0.000133357
nadD	0.973267	6.49232	47.5927	4.98738e-06	3.38052e-05
PA14_72540	0.973167	8.86066	39.7077	1.39991e-05	7.8834e-05
mdcD	0.972764	3.88328	6.73286	0.0202708	0.0389718
PA14_21640	0.971947	5.42076	26.2928	0.000122587	0.000483691
PA14_03290	-0.971806	6.42324	20.4654	0.000400631	0.00132249
PA14_65210	-0.97044	7.18509	9.15326	0.00849547	0.0185203
rpmJ_2	-0.970134	5.60999	13.2535	0.00240532	0.00622591
pqsH	0.969999	7.62267	38.3253	1.70403e-05	9.30847e-05
PA14_31760	0.969835	4.64553	17.538	0.000787135	0.00235547
PA14_49590	0.96968	5.18709	21.7287	0.000304819	0.00104615
ptsN	-0.969365	9.54486	58.6983	1.43184e-06	1.34134e-05
PA14_71400	-0.969365	0.944995	0.952591	0.344492	0.435217
fabF2	0.969096	4.79813	24.9992	0.000156934	0.000597071
phaJ3	0.968365	4.14721	10.9377	0.00477049	0.0112743
PA14_54130	-0.968266	4.37604	20.0231	0.000441939	0.00143492
PA14_01400	0.968044	4.881	31.6403	4.77939e-05	0.0002216
pvcB	0.96757	2.69087	6.6917	0.020594	0.0395167
motA	-0.966403	8.16897	85.9284	1.30777e-07	2.31207e-06
PA14_31540	0.965851	6.78825	31.7941	4.65955e-05	0.000216887
PA14_47330	-0.965548	6.00222	26.9958	0.000107551	0.000433846
PA14_56720	0.964667	4.41378	25.5061	0.000142318	0.000548112
PA14_70110	-0.964538	5.88503	43.1588	8.75536e-06	5.3229e-05
PA14_46000	-0.96408	2.0196	2.35979	0.145257	0.211187
PA14_41980	-0.963881	6.70883	33.4942	3.53859e-05	0.000171825
PA14_32830	-0.963668	6.76598	31.8093	4.64788e-05	0.000216683
PA14_28740	-0.963663	0.372184	0.681221	0.42206	0.514555
PA14_08020	0.963308	3.39082	5.09013	0.0393703	0.069481
gnyD	0.962976	9.46153	20.028	0.000441459	0.00143414
argG	-0.962844	8.48575	29.5763	6.77935e-05	0.000296124
PA14_15810	0.96268	3.06462	3.85877	0.0682329	0.111255
PA14_47110	0.961962	5.20221	35.2815	2.67776e-05	0.000134861
PA14_73120	0.96193	7.88641	10.0952	0.00622737	0.0141505
PA14_54630	0.961619	6.51747	18.871	0.000574303	0.00180565
mscL	-0.960857	10.1142	40.8099	1.20116e-05	6.98199e-05
mobA	0.960533	4.3057	24.3652	0.000177673	0.000662023
hemC	-0.959993	7.01818	60.0577	1.24551e-06	1.21059e-05
PA14_69110	0.959106	5.83956	24.7282	0.000165443	0.000622686
PA14_55050	-0.958903	7.83309	81.4807	1.8418e-07	2.88174e-06
fleQ	-0.958818	8.62017	85.3315	1.36804e-07	2.35572e-06
PA14_46560	-0.958265	3.65736	10.0253	0.00636962	0.0144297
PA14_40930	0.957959	3.49991	14.2384	0.00183168	0.00490921
cobJ	0.957625	3.40886	3.94219	0.0656247	0.107356
PA14_58910	-0.957121	4.8947	18.2973	0.000656669	0.00202178
PA14_54970	-0.956915	5.18062	49.017	4.1986e-06	2.98511e-05
cobN_2	0.956393	3.1671	6.44892	0.0226257	0.0427677
PA14_50650	0.956097	4.36534	21.1156	0.000347614	0.00117077
mucC	-0.955985	6.97929	7.09032	0.0176972	0.0347184
PA14_22440	-0.955673	6.77293	32.0206	4.48913e-05	0.000210269
PA14_15720	-0.955284	6.52568	42.0572	1.01381e-05	6.05238e-05
PA14_45450	-0.954652	2.42206	4.9082	0.0425673	0.0742871
PA14_07150	0.954302	4.38759	14.7948	0.00157733	0.00430892
PA14_57480	0.953964	7.21029	57.1799	1.67834e-06	1.50143e-05
uppS	0.953336	8.03505	28.6096	8.03192e-05	0.000343041
PA14_28770	-0.953137	8.37312	35.0095	2.79196e-05	0.000139551
PA14_41880	-0.952946	7.57329	36.1026	2.36396e-05	0.000121418
rpsS	0.952296	8.7841	11.6681	0.00381623	0.00930322
PA14_19230	0.951613	4.5813	19.366	0.000512568	0.00163309
PA14_11530	-0.951543	4.22034	3.57102	0.0782199	0.124641
PA14_55760	-0.950421	6.9968	35.136	2.73817e-05	0.000137208
PA14_46440	0.95004	4.93549	18.2218	0.000668476	0.0020477
xthA	0.949984	6.07821	44.8099	7.06484e-06	4.50818e-05
popD	-0.949932	3.64205	15.0787	0.00146322	0.00402859
PA14_36280	0.949402	1.56647	2.69203	0.121583	0.181734
nasS	0.949175	4.21404	18.307	0.000655162	0.00201938
PA14_36890	0.948998	1.47937	1.47409	0.243414	0.327176
exoU	-0.948935	8.43258	56.6218	1.78079e-06	1.56258e-05
PA14_34960	0.948749	6.53834	37.6654	1.87515e-05	0.000100469
PA14_48930	-0.948677	4.04101	9.10969	0.00862136	0.0187331
PA14_33600	-0.948579	6.22319	31.1839	5.15625e-05	0.00023559
PA14_36780	0.947591	5.54943	15.0868	0.00146011	0.00402238
PA14_32250	-0.947294	2.68903	6.67298	0.0207429	0.039764
PA14_20880	-0.947263	4.45845	21.6843	0.000307704	0.00105362
kdpA	-0.946834	2.66607	7.96533	0.0128371	0.0264739
PA14_24940	0.946684	4.7067	15.1423	0.00143898	0.00396919
PA14_25600	-0.946655	6.93916	22.4971	0.000259379	0.000912806
PA14_30370	-0.946573	5.1689	9.73915	0.00699177	0.0156487
rsaL	-0.945533	9.65224	23.1715	0.000225759	0.0008147
hutI	0.945438	4.7512	19.0941	0.000545493	0.00172842
PA14_28300	0.94496	1.82345	3.12065	0.0975791	0.150616
PA14_25930	0.944308	2.46914	6.1433	0.0255212	0.0475172
dsbA	-0.943831	9.3558	50.2342	3.63532e-06	2.69729e-05
nosL	-0.942774	4.53078	20.1262	0.000431898	0.0014131
PA14_73150	-0.94192	6.52383	50.7287	3.43138e-06	2.6002e-05
PA14_66420	-0.941232	6.38004	16.4705	0.00102359	0.00296191
PA14_33970	-0.940913	4.36689	17.8695	0.000726857	0.00219612
PA14_69540	-0.940863	3.16234	18.9258	0.000611366	0.00190409
PA14_47950	0.940772	2.4166	5.30215	0.035991	0.064356
atpG	0.940752	9.30108	19.8368	0.000460772	0.00148796
PA14_51830	0.940033	10.7244	16.6321	0.000983078	0.00285716
rpsD	0.939738	9.83384	14.5228	0.00169625	0.00459584
PA14_47410	0.939289	4.60154	31.1887	5.15215e-05	0.000235584
recG	-0.939098	6.39295	74.8078	3.17615e-07	4.31646e-06
PA14_42130	0.938871	6.29819	52.4777	2.80734e-06	2.21245e-05
PA14_28560	0.938814	4.04078	4.85787	0.0435045	0.0756125
PA14_07400	-0.938584	3.29703	13.8948	0.00201197	0.00533719
PA14_66490	-0.93847	3.81226	6.95217	0.0186444	0.0363137
PA14_35360	-0.938374	1.86409	1.72901	0.208225	0.286316
PA14_71200	-0.938307	1.2409	1.1777	0.294906	0.383217
PA14_40830	0.938264	7.64555	74.6745	3.21225e-07	4.32999e-06
PA14_22230	-0.938043	3.44546	9.47265	0.00763439	0.0168778
PA14_46630	0.938012	3.18317	9.9686	0.0064877	0.0146535
PA14_18985	-0.937974	5.50988	50.7093	3.43911e-06	2.60028e-05
nth	-0.937661	4.99016	33.231	3.69019e-05	0.000177703
treA	0.937287	6.37338	37.4461	1.93629e-05	0.000102912
PA14_59900	-0.937261	4.19737	11.4883	0.0040291	0.00975431
PA14_65030	-0.937211	5.79241	34.2339	3.14905e-05	0.000155315
PA14_34290	0.935619	1.80899	2.61716	0.178899	0.251862
PA14_68440	0.935491	7.48776	18.6296	0.000607429	0.0018948
PA14_14170	0.934583	6.09957	32.4362	4.19453e-05	0.000198499
PA14_40850	0.934072	7.19289	25.725	0.000136487	0.00052942
engB	-0.932424	7.65797	21.5656	0.000315586	0.00107751
PA14_61840	-0.932079	7.03186	16.3651	0.00105103	0.00302953
PA14_10660	0.931297	3.71303	11.5016	0.00401293	0.00971912
PA14_62290	-0.931033	4.32033	7.30474	0.0163346	0.0325055
PA14_53150	-0.93072	7.21344	37.719	1.86056e-05	9.99569e-05
[truncated: 3,959 more rows]

## Sheet: 3-edgeR_Pa_on_adh1vypd
genes	logFC	logCPM	F	PValue	FDR
PA14_26720	7.09549	10.1032	380.717	5.42e-14	1.61e-10
PA14_10270	7.08637	6.00376	65.2022	3.32e-07	1.72e-05
PA14_26730	6.75148	9.72608	87.4601	1.59e-08	3.02e-06
PA14_10280	6.51085	7.23712	33.2956	1.49e-05	0.00027508
PA14_11190	6.50733	6.29954	84.4313	5.48e-08	5e-06
PA14_26700	5.90314	10.0996	110.243	2.49e-09	8.68e-07
PA14_26670	5.85257	8.68706	196.513	1.91e-11	2.5e-08
PA14_26690	5.83894	7.63934	70.6136	8.27e-08	6.72e-06
PA14_26750	5.76384	10.9755	502.793	4.33e-15	2.56e-11
PA14_63310	5.28527	4.30208	66.4944	3.79e-06	9.43e-05
PA14_26650	5.16712	7.49853	52.1027	7.64e-07	3.16e-05
PA14_37310	5.11217	6.7772	34.8291	1.13e-05	0.00021863
PA14_37270	4.91076	7.65702	49.179	1.14e-06	3.94e-05
PA14_69550	-4.82879	3.83417	14.0352	0.00196117	0.0121527
pscN	-4.79911	3.34278	14.7693	0.00161007	0.0104424
PA14_10240	4.72529	7.07973	13.7671	0.00149255	0.00994588
adh	4.68563	7.32607	18.1151	0.00043038	0.00386129
mtlY	4.55141	3.66846	21.4615	0.00037286	0.00345132
PA14_55540	4.52846	8.46904	20.0045	0.00026326	0.00265227
pelC	4.49461	3.8821	14.465	0.00143073	0.00964237
PA14_52910	4.4864	3.63325	9.95549	0.00580295	0.0285047
acoR	4.33199	9.85978	75.7105	4.86e-08	4.74e-06
PA14_44590	4.23708	8.70231	88.838	1.4e-08	3.02e-06
PA14_49090	4.19236	3.60661	12.2097	0.00279443	0.016108
PA14_48550	4.1695	4.98021	44.5798	0.00205738	0.0126825
PA14_25930	4.0749	3.65412	12.3121	0.00317137	0.0177071
acoB	4.07478	7.0878	17.7327	0.00047697	0.00417362
PA14_55300	3.97853	5.26434	13.1539	0.00317137	0.0177071
phzD1	3.97535	7.30232	19.2788	0.00031698	0.00307831
PA14_00600	3.97463	5.74945	25.6813	6.92e-05	0.00088336
PA14_49570	3.95238	5.36738	23.7974	0.00010556	0.00125567
PA14_52320	3.92849	3.44741	6.33514	0.0222157	0.080493
pscE	-3.90947	3.13515	9.32911	0.00807063	0.037005
PA14_55330	3.90841	4.96171	24.0332	0.00490351	0.0248915
PA14_37260	3.89426	8.41663	243.955	2.89e-12	5.7e-09
PA14_64420	3.89337	3.44649	8.59156	0.00935922	0.041253
PA14_67960	3.88991	3.53099	10.5577	0.00490351	0.0248915
PA14_37290	3.86916	6.85547	29.2652	3.25e-05	0.00049064
cobT	3.79948	3.74175	13.2166	0.0076092	0.0352163
PA14_49620	3.78838	3.68071	12.8766	0.0076092	0.0352163
PA14_28930	3.75973	3.5312	13.9789	0.0076092	0.0352163
PA14_13910	-3.70335	3.15572	7.51344	0.0152112	0.0602347
PA14_24130	-3.67132	3.48901	8.06442	0.0105023	0.0451165
hcpC	-3.6232	4.99875	19.158	0.00032705	0.00314008
PA14_27660	3.61961	3.26152	5.28789	0.0344812	0.112668
PA14_53870	3.61132	3.33793	6.49022	0.0208633	0.0771018
PA14_35970	3.59748	3.35148	6.34549	0.0221224	0.080204
PA14_27420	-3.55725	3.14298	7.07206	0.0179149	0.0686468
PA14_20470	-3.54636	4.86919	17.0077	0.00058148	0.00487222
phnI	3.53144	4.693	19.6872	0.00028539	0.00284518
PA14_65160	3.49759	9.1263	134.622	4.79e-10	3.55e-07
benD	3.4937	3.38905	5.58549	0.0303443	0.10231
PA14_36990	3.47088	3.22854	5.4002	0.0328483	0.108529
hasAp	3.46653	6.79547	113.403	1.98e-09	7.81e-07
PA14_27830	3.43596	3.34522	5.91655	0.0263953	0.0915229
cobH	3.4349	3.48503	11.9607	0.0185836	0.0706153
PA14_60180	-3.43283	3.22793	6.29726	0.0241223	0.0858397
PA14_58410	3.40327	9.69349	194.272	2.11e-11	2.5e-08
PA14_00620	3.3815	8.41591	59.3217	3.01e-07	1.64e-05
PA14_36110	-3.29336	3.14981	6.94262	0.0188101	0.0712932
PA14_46000	3.286	3.23466	4.73688	0.0439783	0.1363
PA14_32650	3.25873	3.27177	4.75245	0.0436716	0.135806
PA14_34770	3.2562	3.67195	9.98149	0.0293185	0.0992474
PA14_37320	3.24883	4.88644	14.2739	0.00127941	0.00882328
PA14_59430	-3.24224	3.13217	6.90114	0.0191078	0.0721905
PA14_07900	3.22649	7.12732	51.565	8.21e-07	3.18e-05
PA14_02420	3.22079	3.29901	4.02257	0.0611557	0.171375
phnW	3.2155	3.55134	8.21354	0.0293185	0.0992474
PA14_38000	3.21491	4.02194	10.1659	0.00485663	0.0248308
PA14_55631	-3.1986	12.2098	15.8789	0.00079861	0.00618423
PA14_17910	3.18033	7.62538	122.727	1.03e-09	5.1e-07
phnD	3.10777	7.31284	31.7683	1.99e-05	0.0003465
PA14_37990	3.0969	3.89659	5.81627	0.0262055	0.0911042
PA14_18250	-3.04951	4.76362	39.8764	4.72e-06	0.00010881
PA14_55520	3.04525	3.29546	4.25648	0.054791	0.158797
PA14_46900	3.04084	3.11445	3.59469	0.075173	0.198137
fadA	3.03992	9.96434	117.697	1.46e-09	6.17e-07
PA14_11330	3.03942	4.279	10.0067	0.00513659	0.0258093
PA14_07440	-3.03208	3.79157	11.5917	0.00298644	0.0170276
PA14_52540	3.02748	3.26129	4.71471	0.0466673	0.141846
cynT	3.02604	3.41893	5.02963	0.0466673	0.141846
PA14_62060	-3.02331	12.9706	11.3656	0.00322002	0.0178776
PA14_28110	3.01556	3.32784	4.83919	0.0466673	0.141846
PA14_20480	-3.0046	5.71775	48.8268	1.2e-06	4.03e-05
PA14_55280	3.00336	5.70686	7.6181	0.0124909	0.0516731
glcF	-3.00186	4.12693	10.94	0.00371723	0.0202398
PA14_21090	3.00052	3.05169	3.31523	0.0918669	0.229338
popN	-3.00022	3.28342	5.28251	0.0331124	0.109219
PA14_36560	-2.97896	7.30322	95.9315	7.64e-09	1.92e-06
leuC	2.95848	8.56278	54.13	5.82e-07	2.63e-05
PA14_05890	-2.91028	4.85369	14.9489	0.00104622	0.00763278
PA14_66520	-2.90136	3.62931	6.59333	0.0188745	0.0714914
PA14_14080	2.89311	5.31646	10.7054	0.00402744	0.0215136
PA14_07870	2.87984	9.7219	79.9615	3.19e-08	3.94e-06
PA14_04180	-2.87699	6.40364	65.5499	1.44e-07	1.06e-05
PA14_49610	2.86941	4.42063	10.3875	0.00449493	0.0235437
dppC	2.86861	6.73676	40.3373	4.38e-06	0.00010457
pvdJ	2.85376	9.32122	57.6427	3.71e-07	1.84e-05
PA14_42960	-2.83886	2.99893	4.66885	0.0473896	0.14316
PA14_64620	-2.8325	3.86711	6.30655	0.0212701	0.0779659
pvcA	2.83126	3.95713	8.65501	0.00839476	0.0381317
PA14_53380	2.7934	5.71524	8.38792	0.00928273	0.041038
PA14_50770	2.79168	7.6092	87.4393	1.59e-08	3.02e-06
PA14_31740	2.77416	3.2166	3.28369	0.0877537	0.222159
PA14_33370	2.77414	3.54848	4.10062	0.0751922	0.198137
PA14_33200	-2.77302	3.04963	4.29096	0.0560692	0.161553
PA14_20980	2.75522	5.79967	16.4275	0.00068353	0.00550913
PA14_71190	2.75158	3.11979	3.30156	0.0869668	0.220639
PA14_08200	2.74983	3.48055	5.65877	0.0751922	0.198137
PA14_58420	2.74004	9.61187	148.088	2.15e-10	2.13e-07
PA14_56750	2.73593	3.37574	4.39466	0.0751922	0.198137
PA14_36630	2.73486	8.98644	85.0934	1.97e-08	3.35e-06
PA14_18340	2.73417	3.22505	3.5424	0.0771318	0.202002
PA14_10890	2.73239	3.36044	3.30981	0.0866065	0.22007
PA14_07890	2.72305	7.97064	60.7128	2.54e-07	1.48e-05
PA14_10400	2.71482	3.06682	3.09034	0.0968304	0.237427
PA14_08590	2.71481	3.05704	3.14365	0.0942209	0.232665
pa1L	-2.71366	8.76013	112.437	2.12e-09	7.85e-07
PA14_18800	-2.71007	6.16031	61.5965	2.29e-07	1.41e-05
PA14_40610	2.69713	3.0049	2.81533	0.117373	0.271502
PA14_24310	2.67193	7.05574	136.644	4.23e-10	3.55e-07
actP	2.66639	9.43034	50.5298	9.47e-07	3.46e-05
rplW	2.66236	8.85928	58.7257	3.24e-07	1.72e-05
PA14_31170	-2.65624	3.04851	4.07519	0.0618607	0.172778
PA14_54110	-2.65623	3.02859	4.1485	0.0598174	0.169225
PA14_45180	2.65347	4.16752	7.99101	0.0108034	0.0459767
ampC	-2.64182	6.32813	60.0248	2.76e-07	1.56e-05
PA14_43610	2.6388	8.79423	123.688	9.69e-10	5.1e-07
thiG	2.63761	6.38607	35.4462	1.01e-05	0.00019899
PA14_37250	2.62996	9.99638	126.567	8.01e-10	5.1e-07
PA14_20460	-2.61958	4.52788	7.03367	0.0157652	0.061973
PA14_64610	-2.60892	3.78456	5.20889	0.0342185	0.112367
PA14_52340	-2.60857	4.14561	8.49029	0.00893052	0.0399608
phzG2	2.6079	8.28638	10.7172	0.00401117	0.0214654
PA14_66510	-2.60496	4.43559	10.0207	0.00511132	0.025759
PA14_27890	2.58767	3.73453	3.14434	0.0922876	0.230018
glcD	-2.57982	5.35523	21.9962	0.00016109	0.00176072
PA14_58375	2.57848	7.85499	77.5019	4.07e-08	4.38e-06
PA14_54270	2.56235	5.13071	35.5079	9.97e-06	0.00019747
PA14_21010	2.55897	6.00904	32.1969	1.83e-05	0.00032697
aguB	-2.558	4.6888	7.39702	0.0136301	0.0555233
PA14_20960	2.55241	5.21828	27.0485	5.15e-05	0.0007114
PA14_08670	-2.54981	3.28771	3.50564	0.0766977	0.201221
PA14_72360	-2.54789	7.8643	10.7589	0.00395422	0.0212059
glgB	2.54535	7.74211	45.9313	1.83e-06	5.48e-05
gnyR	-2.54423	7.17875	80.279	3.1e-08	3.91e-06
PA14_36390	2.53518	4.82325	10.0762	0.00501225	0.0253566
dctA	2.53478	9.3002	46.5705	1.67e-06	5.13e-05
PA14_55100	-2.53234	5.35155	46.091	1.79e-06	5.39e-05
PA14_58440	2.52841	8.20859	67.5632	1.15e-07	8.87e-06
PA14_61200	2.52517	12.1859	120.005	1.24e-09	5.67e-07
PA14_36530	2.51154	8.24748	57.4067	3.82e-07	1.87e-05
PA14_23490	-2.51081	3.19618	3.19521	0.0898824	0.226099
PA14_55110	-2.5033	4.10362	5.79053	0.0264985	0.0915853
PA14_33610	2.50046	9.39928	36.063	9.03e-06	0.00018327
PA14_10360	-2.49911	13.3094	75.2368	5.1e-08	4.74e-06
PA14_36050	2.49062	3.87356	4.55591	0.046107	0.140938
PA14_70910	-2.48258	12.1435	12.6165	0.00213945	0.0131066
PA14_08570	-2.48034	11.9596	11.0215	0.00361569	0.0197596
PA14_71900	-2.47999	10.5645	81.8269	2.67e-08	3.78e-06
PA14_09990	-2.47976	3.70013	4.55313	0.0461669	0.140975
PA14_55740	2.47883	5.27623	13.131	0.00181804	0.0114332
dppD	2.47301	6.95673	78.0848	3.84e-08	4.21e-06
PA14_62090	-2.47269	12.1592	12.2071	0.00244067	0.0145166
glcE	-2.47068	3.82854	6.96904	0.0161832	0.0632382
PA14_55637	-2.46471	12.1488	12.4355	0.00226724	0.0136773
PA14_62690	-2.4613	11.4527	76.7744	4.37e-08	4.61e-06
PA14_32970	2.45566	4.40364	11.7704	0.00281513	0.0161285
PA14_18680	-2.45071	7.40809	48.8878	1.19e-06	4.02e-05
PA14_36500	2.44615	7.78886	50.8441	9.07e-07	3.44e-05
lldP	2.44082	8.45766	56.9731	4.04e-07	1.96e-05
PA14_22720	2.44019	4.34356	8.97709	0.00744798	0.0346597
PA14_10220	2.43466	5.56303	27.6472	4.54e-05	0.00063893
holC	2.43304	5.47779	32.1637	1.84e-05	0.00032707
pslI	2.43228	3.68491	4.15323	0.055782	0.160961
PA14_48780	2.4321	5.09861	31.3055	2.17e-05	0.0003659
PA14_19650	-2.42403	4.46101	6.94166	0.016364	0.0638185
rmf	-2.42145	10.0936	87.3564	1.6e-08	3.02e-06
purD	2.41107	6.28314	51.7258	8.04e-07	3.17e-05
PA14_03110	2.40998	3.13323	3.04144	0.123339	0.280789
PA14_28330	2.40987	3.0691	2.29007	0.148656	0.319535
rplD	2.40606	10.1558	64.9851	1.54e-07	1.09e-05
phnM	2.40539	5.67624	13.2591	0.0017466	0.0110899
PA14_33980	-2.39688	4.33544	6.79064	0.0174031	0.0672072
PA14_03420	-2.39292	6.83777	41.1515	3.84e-06	9.47e-05
PA14_19680	-2.3929	3.86608	4.51724	0.0469474	0.142405
PA14_14400	2.39123	3.10985	2.74023	0.123339	0.280789
PA14_52870	2.39111	3.29057	3.169	0.123339	0.280789
PA14_37520	2.38909	3.20909	3.12256	0.123339	0.280789
PA14_63710	2.38909	3.13053	2.69852	0.123339	0.280789
cupB4	2.38909	3.12101	2.71587	0.123339	0.280789
PA14_35050	2.37008	3.10922	3.04431	0.123339	0.280789
PA14_37370	2.36793	3.1279	2.99812	0.123339	0.280789
PA14_13950	-2.36373	6.65623	41.0545	3.9e-06	9.58e-05
PA14_36150	-2.36313	3.17733	3.19054	0.0901001	0.226358
PA14_04850	2.36274	3.56946	4.00368	0.0599552	0.169453
PA14_24790	2.36075	9.07534	65.1647	1.51e-07	1.08e-05
PA14_52000	2.35794	3.90187	2.70206	0.116731	0.270816
PA14_06480	2.34076	6.76194	38.6201	5.82e-06	0.00013153
rpmC	2.33966	7.5013	58.1207	3.49e-07	1.77e-05
PA14_37200	2.33948	8.78478	81.5525	2.74e-08	3.78e-06
PA14_14060	2.3263	6.35121	49.0707	1.16e-06	3.96e-05
rplO	2.31946	9.93029	89.6624	1.31e-08	2.98e-06
PA14_38310	2.31936	3.82651	5.01394	0.037356	0.119685
fabH2	2.31409	5.45538	6.766	0.0175796	0.0675366
PA14_36920	-2.30025	4.06784	3.9833	0.0605513	0.170083
pcrH	-2.2991	3.67559	4.58257	0.0455377	0.139775
PA14_55250	2.2986	5.05156	10.1604	0.00486598	0.0248308
hasE	2.2927	3.52926	2.58805	0.12423	0.282011
PA14_11920	2.29253	4.30699	5.40345	0.0313826	0.104856
pvdD	2.29103	9.32593	60.6186	2.57e-07	1.48e-05
PA14_70880	-2.2869	13.761	14.9688	0.00104008	0.00759734
oprN	2.28384	3.881	2.92614	0.103501	0.248537
PA14_19900	-2.27957	6.22333	25.2346	7.63e-05	0.00094421
PA14_62680	-2.27934	11.3719	76.4545	4.51e-08	4.61e-06
pcrV	-2.27471	4.53292	13.5541	0.00159368	0.0103861
PA14_08600	-2.26762	13.7612	14.5513	0.00117722	0.00833193
dppF	2.26747	7.13115	71.2147	7.75e-08	6.47e-06
PA14_55510	-2.2653	4.22751	8.19945	0.00997265	0.0432831
phzE1	2.26249	9.51557	43.5391	2.63e-06	7.08e-05
rplV	2.25135	9.18761	81.7825	2.68e-08	3.78e-06
algK	2.25019	3.56657	3.00309	0.0993724	0.241758
PA14_14420	2.24996	5.04679	5.57797	0.0290642	0.0986685
katB	2.23768	8.87107	20.1965	0.00025079	0.00255271
PA14_24570	-2.23742	3.51233	2.81303	0.109943	0.260336
PA14_34640	-2.23376	5.94169	59.6745	2.88e-07	1.6e-05
PA14_46460	-2.22941	9.06419	88.5726	1.44e-08	3.02e-06
PA14_72960	-2.22824	6.96898	36.9748	7.7e-06	0.00016125
fadB	2.22122	11.1134	45.5302	1.95e-06	5.71e-05
PA14_58390	2.21507	11.751	79.1329	3.46e-08	4.07e-06
secY	2.21242	11.3556	99.0528	5.91e-09	1.59e-06
pvdL	2.20786	8.63201	27.2032	4.99e-05	0.00069492
PA14_34370	2.19628	3.72877	4.39286	0.0497721	0.148091
metE	2.19439	6.47164	20.9656	0.00020703	0.00216682
rplB	2.19249	10.3622	57.7471	3.66e-07	1.84e-05
PA14_47430	2.18968	5.10286	9.36781	0.00645609	0.0310942
PA14_00960	2.18797	4.17515	6.25978	0.0216925	0.0789837
PA14_19910	-2.18565	6.55612	50.7944	9.13e-07	3.45e-05
PA14_52490	2.18103	3.88649	4.93226	0.038767	0.12314
sucD	2.17934	9.81924	123.79	9.62e-10	5.1e-07
PA14_27610	-2.17802	4.15139	5.45855	0.0306287	0.103093
PA14_21810	-2.17772	3.40679	2.33861	0.142747	0.310667
phzC2	2.17719	9.66698	36.4436	8.45e-06	0.00017361
pelE	2.1753	3.56104	2.84886	0.107853	0.256675
PA14_49580	2.16596	5.44977	22.1101	0.00020359	0.00213461
PA14_27880	2.16567	3.89633	3.11704	0.0936093	0.231832
PA14_63100	2.16322	6.84763	19.0294	0.00033815	0.003231
PA14_28100	2.15408	3.96581	6.0109	0.0241058	0.0858397
PA14_49690	-2.14633	6.04954	23.5572	0.00011156	0.00130863
PA14_10260	2.14071	7.53534	15.0556	0.00101387	0.00744257
PA14_36480	2.13614	5.2377	25.4206	7.33e-05	0.00092353
algA	2.13312	5.73383	16.6624	0.00064	0.00523667
PA14_40380	-2.11653	5.02931	16.6215	0.00064735	0.00527494
rpmD	2.11319	8.46057	79.013	3.5e-08	4.07e-06
PA14_28600	-2.1068	6.51273	16.3018	0.00070817	0.00563874
PA14_24330	2.10661	7.86508	79.0667	3.49e-08	4.07e-06
PA14_14010	2.10585	4.21395	4.97104	0.0380897	0.121389
amiR	-2.10048	5.0081	9.8933	0.00534694	0.0266627
fusA1	2.09994	12.0676	37.6674	6.84e-06	0.00014675
phnH	2.09788	4.27268	7.39995	0.0136142	0.0555233
sucC	2.09711	9.7424	101.946	4.69e-09	1.39e-06
rcsB	-2.09606	6.07305	29.7544	2.95e-05	0.00045932
PA14_61260	2.09101	4.65006	4.45507	0.0483357	0.145277
PA14_36790	2.08207	4.29333	5.34751	0.0321696	0.106704
PA14_71100	2.0756	4.96111	2.5612	0.126079	0.284747
PA14_61610	-2.07378	6.06768	18.5808	0.00038033	0.00350401
PA14_36605	2.07287	8.06914	47.0877	1.55e-06	4.92e-05
PA14_59030	-2.06738	3.04482	1.89552	0.188886	0.373734
exbB2	2.06517	5.81105	8.33806	0.00945988	0.0415421
PA14_00580	2.06421	3.46389	2.06881	0.166674	0.345719
PA14_59110	-2.05817	4.16772	5.05677	0.0366395	0.118156
PA14_06450	2.05801	6.82528	24.0155	0.00010042	0.00120421
PA14_03310	-2.05411	7.19609	95.6897	7.79e-09	1.92e-06
PA14_14320	2.04346	3.51867	2.47319	0.132374	0.294695
PA14_53880	2.04329	4.48027	7.61336	0.0125142	0.0517334
PA14_06640	2.03906	7.11356	30.4149	2.59e-05	0.0004165
PA14_36090	-2.03874	3.61208	3.11748	0.0935879	0.231832
lldD	2.03796	6.57213	25.3491	7.44e-05	0.00093425
feoA	-2.03563	3.43189	2.60576	0.123028	0.280789
PA14_34030	2.03513	4.34779	7.45327	0.0133295	0.0544956
rpsC	2.03486	10.1776	62.029	2.17e-07	1.38e-05
rplA	2.03117	10.9925	61.4239	2.33e-07	1.41e-05
PA14_10850	2.02861	6.09818	6.99409	0.0160198	0.0626824
PA14_12960	-2.02781	3.40053	3.06622	0.0961296	0.2361
PA14_29250	-2.0272	3.35414	2.98351	0.100404	0.243668
ligD	-2.02615	4.78291	14.8415	0.00107993	0.00783049
PA14_36700	2.02431	6.0877	24.5086	8.98e-05	0.0010834
ada	2.02416	5.52645	17.3412	0.00053054	0.0045157
rpsS	2.02299	8.81191	51.7849	7.97e-07	3.17e-05
PA14_10070	-2.0215	3.14209	2.27105	0.148324	0.318936
rplP	2.02069	9.26352	44.6695	2.21e-06	6.22e-05
PA14_03610	2.01993	6.9806	26.1985	6.18e-05	0.00080744
PA14_56550	-2.01764	4.67036	7.14989	0.0150439	0.0598121
hcpB	-2.01386	5.70157	7.30299	0.0141496	0.0572025
trmD	2.0135	8.9405	85.5525	1.89e-08	3.35e-06
mtlZ	2.01348	4.69045	6.92137	0.0164995	0.0641807
PA14_13140	2.0115	9.96969	63.413	1.85e-07	1.24e-05
rpsR	2.00936	8.61693	53.5076	6.32e-07	2.78e-05
exsB	-2.00921	4.53472	12.3818	0.00230677	0.0138875
rpsE	2.00836	10.3682	69.3858	9.44e-08	7.55e-06
PA14_48840	-2.00724	4.90869	8.29193	0.00962718	0.0421207
PA14_07340	2.00458	3.91576	3.44333	0.0791525	0.205621
cobS	-2.00386	3.50299	3.05939	0.0964742	0.236749
PA14_21480	-2.00223	4.52478	12.1263	0.00250554	0.0148428
PA14_69750	-2.00221	6.37808	62.3651	2.09e-07	1.34e-05
PA14_24120	-2.00072	3.2807	1.63462	0.216524	0.407981
arcB	-2.00039	8.90137	53.9063	6e-07	2.67e-05
PA14_01060	1.99985	3.39972	2.06454	0.16709	0.346079
PA14_55750	1.99859	7.49944	29.4819	3.12e-05	0.00047551
atoB	1.99837	7.41926	25.7683	6.79e-05	0.00086856
PA14_55410	1.99671	10.7671	7.01001	0.0159168	0.0624031
PA14_70650	-1.99626	3.53905	2.45767	0.133523	0.296696
PA14_55380	1.99616	5.23775	8.37729	0.00932018	0.0411728
PA14_55240	1.99052	3.95025	4.46774	0.048049	0.144562
hcnC	1.98848	7.288	38.3023	6.14e-06	0.00013377
PA14_48500	1.98746	4.06908	2.88902	0.105565	0.252164
PA14_55560	1.98699	4.01759	3.73341	0.0684462	0.186254
mvaT	-1.98606	11.2679	106.136	3.39e-09	1.12e-06
PA14_36860	-1.9836	4.60171	13.4948	0.0016232	0.0105091
fadH1	1.98252	7.2643	52.0159	7.73e-07	3.16e-05
PA14_38290	1.98143	3.73183	3.59813	0.0732148	0.195263
PA14_37210	1.98052	8.69021	90.327	1.23e-08	2.92e-06
PA14_18870	-1.98042	6.26535	18.2362	0.0004167	0.00375156
PA14_33870	-1.97656	5.977	19.0164	0.0003393	0.00323673
ribB	1.97588	6.68679	39.9715	4.65e-06	0.00010881
popB	-1.97519	4.88306	18.7347	0.00036524	0.00340374
etfA	1.97248	9.41793	81.0466	2.88e-08	3.87e-06
PA14_52880	-1.97032	3.0471	2.98493	0.134766	0.298005
PA14_40040	1.96958	5.87368	26.5373	5.75e-05	0.00075982
amiE	-1.9674	8.31682	84.6034	2.06e-08	3.35e-06
PA14_03410	-1.96679	3.08928	1.86928	0.187581	0.372103
PA14_43620	1.96591	5.14783	6.65922	0.0183681	0.0700211
PA14_11120	-1.96115	6.66614	32.5122	1.73e-05	0.00031083
PA14_07970	1.96084	3.15761	1.89525	0.208338	0.397132
hcpD	-1.95697	5.2691	4.02151	0.0594392	0.168477
PA14_07430	-1.95409	8.79433	51.6528	8.12e-07	3.17e-05
PA14_11730	-1.95157	4.44135	5.42554	0.0310778	0.104309
infB	1.95089	11.6259	75.6309	4.9e-08	4.74e-06
rimM	1.94724	9.19213	65.1276	1.52e-07	1.08e-05
PA14_01350	1.94716	4.67829	17.0083	0.00468317	0.0241875
PA14_19920	-1.94628	6.16121	26.7488	5.49e-05	0.00073269
PA14_13210	-1.94222	4.70045	14.0994	0.0013487	0.00920475
nirM	-1.94177	7.03801	43.5463	2.63e-06	7.08e-05
PA14_21140	1.94062	3.53216	2.29758	0.146103	0.315997
PA14_08690	1.94013	3.0786	2.11835	0.208338	0.397132
PA14_61500	-1.93989	7.35398	32.5646	1.71e-05	0.0003087
PA14_34930	1.93746	3.04367	1.72934	0.208338	0.397132
PA14_47940	1.93746	3.07058	2.12653	0.208338	0.397132
PA14_34000	1.93744	3.02171	1.75847	0.208338	0.397132
PA14_62890	1.93648	7.06715	40.1388	4.52e-06	0.00010715
PA14_54550	1.93477	4.01143	5.33199	0.208338	0.397132
PA14_71140	1.93477	2.97306	1.83365	0.208338	0.397132
kdpC	1.93435	3.02363	1.75245	0.208338	0.397132
rpoC	1.92951	12.2261	50.7037	9.25e-07	3.46e-05
rpoB	1.9276	12.279	59.5582	2.93e-07	1.6e-05
PA14_09930	1.92727	5.83419	22.3933	0.00014651	0.00163145
PA14_56160	1.92671	4.97556	5.47309	0.0304332	0.102494
rplR	1.92458	9.65157	54.4698	5.57e-07	2.54e-05
PA14_39570	1.92251	3.962	2.73704	0.114539	0.267031
amiC	-1.92201	5.41067	21.4138	0.00018547	0.00198688
PA14_36590	1.92175	7.43904	42.7612	2.97e-06	7.79e-05
cheB	-1.91695	3.97676	4.0563	0.058447	0.166302
PA14_22380	1.91681	5.5111	6.65083	0.0184318	0.0701734
PA14_33520	1.91252	5.89485	15.3451	0.00093159	0.00698574
pelD	1.91131	3.96901	3.33724	0.0835461	0.213969
exsA	-1.91023	5.9988	49.587	1.08e-06	3.76e-05
PA14_53690	1.9081	3.1487	1.85825	0.208338	0.397132
PA14_39850	1.90809	3.06965	1.89009	0.208338	0.397132
phzF1	1.90801	6.96954	41.8711	4.05e-06	9.84e-05
PA14_33550	1.90605	4.45685	9.68805	0.00575263	0.028281
rpsK	1.90488	9.16345	59.7418	2.86e-07	1.6e-05
PA14_32310	-1.90332	5.88192	23.5002	0.00011303	0.00132074
PA14_04230	-1.90224	4.13438	5.79272	0.0264733	0.0915853
kdpA	-1.90147	3.61235	2.53424	0.127968	0.287638
glpM	1.89975	6.13474	37.5462	6.98e-06	0.00014929
PA14_55290	1.8978	5.96943	4.83106	0.0406005	0.127799
PA14_22080	-1.89684	7.39931	73.747	5.95e-08	5.26e-06
PA14_07150	1.89308	4.80115	11.8988	0.00269874	0.0157519
PA14_40650	1.89176	4.266	3.17154	0.0909924	0.228116
PA14_36520	1.89078	8.59839	25.2777	7.56e-05	0.00093844
PA14_30940	-1.88376	3.11456	2.56413	0.134766	0.298005
atpH	1.88375	8.26757	30.934	2.34e-05	0.00038887
PA14_44580	1.87923	6.92346	23.3226	0.00011778	0.00136544
PA14_72500	-1.87239	7.01343	46.5593	1.67e-06	5.13e-05
PA14_39870	1.86939	6.62363	25.3528	7.44e-05	0.00093425
PA14_57830	1.86743	5.33422	29.6108	3.04e-05	0.00046658
PA14_07860	1.86737	8.65751	45.3278	2.01e-06	5.83e-05
PA14_05560	1.86403	8.8388	84.4334	2.09e-08	3.35e-06
narK1	-1.86209	4.65407	4.63048	0.0445347	0.13748
PA14_34250	1.85718	4.19491	4.63952	0.0443481	0.13719
PA14_42090	1.8564	6.72818	31.5329	2.08e-05	0.00035625
fepB	-1.85131	4.34842	3.57707	0.0739915	0.196471
phnJ	1.84369	5.23304	11.7765	0.00280945	0.0161285
PA14_33570	1.84356	4.25207	4.56777	0.0458528	0.140378
PA14_33060	1.84147	5.76652	18.2186	0.00041866	0.00376345
PA14_18960	-1.83935	5.22038	17.8617	0.00046065	0.00406087
PA14_48240	-1.83827	4.66571	14.5058	0.00119335	0.00841597
PA14_24820	-1.83517	3.8829	3.47865	0.0777499	0.203081
exsC	-1.82999	5.91931	30.2205	2.69e-05	0.00043164
proB	1.82897	7.57294	60.5491	2.59e-07	1.48e-05
PA14_67180	-1.82644	6.33052	31.5117	2.09e-05	0.00035668
PA14_26140	-1.82569	5.43392	19.5377	0.00029653	0.00294243
PA14_08060	-1.82538	6.11225	29.7122	2.98e-05	0.00046136
PA14_61760	-1.82479	3.31773	1.83227	0.191808	0.377124
PA14_18070	-1.82366	4.45307	5.95489	0.0246899	0.0871451
atpD	1.82219	10.1072	43.5198	2.64e-06	7.08e-05
PA14_09320	1.81754	5.97931	8.63359	0.00846233	0.0383263
atpA	1.81716	10.4421	44.758	2.19e-06	6.19e-05
PA14_00520	-1.81542	4.24954	4.66927	0.043741	0.135951
PA14_33540	1.81522	4.31585	7.77519	0.0117464	0.0491077
PA14_20250	-1.81494	3.45479	1.89924	0.184243	0.36861
hepA	1.81377	7.42217	70.5933	8.28e-08	6.72e-06
purH	1.81252	7.22684	80.3277	3.08e-08	3.91e-06
PA14_58510	1.81165	4.12413	5.03488	0.0370037	0.119007
nrdB	1.80902	8.70525	75.2699	5.09e-08	4.74e-06
PA14_61510	-1.80665	5.36234	25.8255	6.7e-05	0.0008615
aroQ2	-1.80333	3.39308	1.59181	0.222399	0.415305
PA14_35990	-1.8018	3.31463	2.33727	0.142855	0.310787
hutU	-1.79987	6.47924	56.8386	4.11e-07	1.98e-05
ahpF	1.79972	9.0475	25.5135	7.18e-05	0.0009126
PA14_08610	-1.79892	4.51429	2.75291	0.113561	0.265902
nirS	-1.79657	10.4483	101.211	4.97e-09	1.4e-06
PA14_72370	-1.79023	7.79737	12.1419	0.00249291	0.0147976
nrdA	1.78975	9.43492	78.4098	3.72e-08	4.21e-06
PA14_57950	-1.78466	11.1053	61.2123	2.39e-07	1.43e-05
PA14_47270	1.78356	3.61239	1.35057	0.259627	0.4641
PA14_06460	1.77531	6.80369	17.5253	0.00050456	0.00435442
PA14_57610	1.77106	8.48062	57.6059	3.73e-07	1.84e-05
merT	-1.7683	5.06566	13.5744	0.00158373	0.0103554
glcB	1.76638	9.08783	82.3612	2.54e-08	3.76e-06
guaA	1.76637	8.35213	51.4407	8.36e-07	3.21e-05
PA14_59220	-1.7655	7.36521	78.1933	3.8e-08	4.21e-06
PA14_69010	1.76297	5.88349	26.2492	6.11e-05	0.00080239
rdgC	1.76194	5.10615	12.6491	0.00211735	0.0129981
PA14_18150	1.76074	7.769	21.0445	0.00020304	0.00213263
pcaK	1.75957	3.58331	2.31254	0.144868	0.314129
hcnB	1.75893	7.27762	35.1845	1.06e-05	0.00020717
PA14_38640	1.75892	6.79753	21.0615	0.00020219	0.00212749
PA14_31220	-1.75748	4.17341	3.72312	0.068796	0.186948
PA14_48640	1.75499	3.87663	2.14453	0.159495	0.335156
PA14_38770	1.75332	5.02331	14.612	0.0011561	0.00825147
hisP	1.7513	3.38007	1.40848	0.249996	0.452068
PA14_34830	1.75054	4.62884	4.85387	0.0401787	0.126606
modA	-1.74478	6.24346	50.036	1.01e-06	3.64e-05
PA14_59620	-1.74412	8.63971	62.6894	2.01e-07	1.31e-05
PA14_27620	-1.74285	4.203	4.37716	0.0501421	0.148893
rpsD	1.74108	9.83346	49.3155	1.12e-06	3.89e-05
PA14_16770	1.73916	5.18459	11.2514	0.00334573	0.0184889
pelB	1.7375	6.02908	15.1425	0.00098837	0.00733723
PA14_04860	1.73706	5.73699	10.017	0.00511788	0.025759
purK	1.73593	6.55709	37.0513	7.6e-06	0.00016026
PA14_27370	1.73104	8.11831	75.215	5.12e-08	4.74e-06
rplI	1.73094	9.45184	53.9166	5.99e-07	2.67e-05
rpsF	1.73008	9.91789	48.0485	1.34e-06	4.38e-05
cobB	1.72848	4.42072	9.398	0.00638583	0.0308795
PA14_64360	1.72534	3.51752	1.33469	0.262352	0.46714
PA14_03400	-1.72439	4.67528	14.1635	0.00132277	0.00904862
zwf	-1.72371	7.72462	63.8364	1.76e-07	1.2e-05
PA14_26780	-1.72333	6.85816	52.9793	6.79e-07	2.87e-05
PA14_48750	1.72324	4.32567	5.52041	0.0323662	0.107176
PA14_48140	1.72295	8.14641	25.7688	6.79e-05	0.00086856
PA14_72900	-1.72264	7.40685	51.633	8.14e-07	3.17e-05
pelG	-1.72247	5.14161	8.75537	0.008086	0.0370468
ntrB	-1.72025	6.95162	46.9549	1.58e-06	4.99e-05
PA14_55570	1.71808	6.12355	21.7398	0.00017136	0.00185919
PA14_26560	1.71772	6.22074	28.9624	3.46e-05	0.00051775
PA14_63650	1.71763	3.97394	2.48748	0.131327	0.293024
hasD	1.71493	3.21134	1.29256	0.273505	0.479852
PA14_63110	-1.71377	5.4913	9.38836	0.00640816	0.0309136
pilS2	-1.71157	4.01221	4.37574	0.0501759	0.148919
PA14_37870	1.71088	3.46326	1.40669	0.250286	0.452454
PA14_59600	-1.71001	5.45225	23.5598	0.00011149	0.00130863
PA14_53570	-1.70942	5.80355	26.0167	6.43e-05	0.00083539
PA14_54080	-1.70889	7.54485	80.3074	3.09e-08	3.91e-06
PA14_37350	1.70642	4.32427	3.277	0.0861678	0.219363
PA14_59610	-1.70571	7.98902	66.0697	1.36e-07	1.01e-05
PA14_10200	-1.70284	6.6649	34.7145	1.15e-05	0.00022247
pnp	1.70131	10.5059	58.1013	3.5e-07	1.77e-05
PA14_16150	1.70104	7.02983	12.5209	0.00220589	0.0134394
PA14_50760	1.69944	6.8743	22.9764	0.00012768	0.00145459
PA14_59090	-1.69735	5.97491	40.4908	4.27e-06	0.00010281
PA14_08510	-1.69497	7.50032	62.8078	1.98e-07	1.3e-05
PA14_49800	-1.69395	5.33666	24.4219	9.16e-05	0.00110254
PA14_20570	-1.69195	5.94407	33.4315	1.45e-05	0.00026991
PA14_59560	-1.69068	4.22467	4.42574	0.0490068	0.146403
PA14_29180	1.69038	4.71714	5.02299	0.0372033	0.119519
phzF2	1.6893	6.93208	18.0989	0.00043225	0.00386803
PA14_08420	-1.68896	6.53856	45.6575	1.91e-06	5.64e-05
PA14_46840	-1.68848	5.63334	21.1035	0.00020011	0.00210937
PA14_11310	1.68769	4.32347	7.34606	0.0139089	0.0563972
PA14_59820	-1.68755	5.16578	2.99698	0.099693	0.24224
moaB1	-1.68439	4.83351	4.56869	0.0458331	0.140378
PA14_31230	-1.68376	3.47221	2.00829	0.172697	0.353387
PA14_61190	1.68248	9.37185	60.5686	2.59e-07	1.48e-05
PA14_64520	-1.68194	8.99702	27.6026	4.58e-05	0.0006434
spuA	-1.68185	7.86913	34.0659	1.29e-05	0.00024631
pgk	1.68162	7.28166	54.4998	5.55e-07	2.54e-05
PA14_59860	1.68155	3.40418	1.58419	0.223467	0.416819
rpoA	1.6815	10.8206	45.3178	2.01e-06	5.83e-05
PA14_38260	-1.68099	4.18974	8.087	0.0104116	0.0447917
PA14_01020	1.68098	7.193	20.5498	0.00022953	0.00237299
PA14_50810	1.6788	8.83952	83.4079	2.3e-08	3.59e-06
PA14_19530	1.67556	5.9729	9.84305	0.00544322	0.0270517
PA14_21590	1.67406	5.48763	12.9292	0.00193721	0.012042
PA14_59390	-1.67203	6.71822	16.6038	0.00065057	0.00529389
PA14_42510	-1.67092	3.04606	1.21063	0.285008	0.492816
PA14_36650	1.66914	7.35896	20.03	0.00026156	0.00264416
PA14_34230	1.66404	4.47741	2.96496	0.101394	0.245065
PA14_27230	-1.66362	5.18502	11.7135	0.00286847	0.0163707
PA14_46650	1.66239	4.29247	6.75307	0.017673	0.0678516
PA14_19700	1.66131	7.0741	24.1928	9.64e-05	0.00115893
fliS	-1.6598	9.91335	74.3744	5.57e-08	5e-06
putP	1.65943	6.97971	35.5845	9.83e-06	0.00019545
PA14_65970	-1.65909	3.67246	1.86549	0.188008	0.37262
PA14_37140	-1.65683	3.49843	1.97639	0.175979	0.358179
PA14_03160	-1.65644	8.27188	49.0933	1.16e-06	3.96e-05
PA14_36375	1.65591	5.89012	15.3749	0.00092354	0.0069695
PA14_31630	-1.65565	3.58279	1.67262	0.211475	0.401138
PA14_06710	-1.65451	5.65741	14.5195	0.00118847	0.00839152
PA14_60090	-1.65338	7.88181	28.6759	3.67e-05	0.0005341
PA14_65210	-1.65216	7.24421	26.9906	5.22e-05	0.00071547
PA14_29100	1.65211	4.53687	9.65116	0.0219966	0.0799436
PA14_33460	1.65006	4.84118	4.97864	0.0379585	0.121274
PA14_44400	1.64929	8.13205	67.1444	1.21e-07	9.17e-06
PA14_34020	1.64501	3.54055	1.58612	0.223196	0.416547
PA14_52080	-1.64313	4.71245	10.0404	0.00507588	0.0256129
PA14_51230	-1.64312	4.99587	6.87787	0.0167942	0.0651529
PA14_36660	1.64243	7.06313	43.2087	2.77e-06	7.4e-05
PA14_47750	1.64207	3.67718	1.93572	0.180277	0.363375
pchC	1.64195	4.8848	5.43773	0.0309111	0.103926
PA14_64290	1.64194	3.50495	1.93223	0.180651	0.363635
PA14_07650	-1.6411	9.93586	103.297	4.22e-09	1.32e-06
napc	-1.64025	5.96194	38.4624	5.97e-06	0.00013304
PA14_37220	1.63991	5.40633	21.4952	0.00061866	0.00509023
pqsD	1.63787	7.64245	33.4493	1.45e-05	0.00026986
PA14_41330	-1.6378	3.40259	1.59431	0.22205	0.41483
pqsC	1.6368	7.74067	34.5338	1.19e-05	0.00022691
pilE	-1.63674	7.51285	51.0244	8.85e-07	3.38e-05
PA14_09380	1.63666	5.42748	18.0856	0.00043378	0.00387592
PA14_44200	1.63644	3.38016	1.17175	0.292644	0.500903
PA14_65950	-1.63576	4.35985	6.61226	0.0187274	0.0711162
PA14_00230	-1.6355	3.59588	1.92408	0.18153	0.365032
PA14_58500	1.63446	5.21543	13.7482	0.00150121	0.00998112
PA14_15490	-1.6325	4.23707	4.18165	0.0550273	0.159248
PA14_06200	-1.63135	3.10481	1.18489	0.290033	0.498015
PA14_33170	-1.63106	4.37491	6.93589	0.0164024	0.0639263
PA14_28870	-1.62758	5.37551	15.937	0.00078546	0.00610641
nirJ	-1.62694	6.3817	33.5585	1.42e-05	0.00026619
PA14_44920	-1.62618	8.0481	59.253	3.04e-07	1.64e-05
PA14_54970	-1.62615	5.30774	16.057	0.00075906	0.00594009
PA14_59020	-1.62422	3.7063	2.39499	0.138286	0.303523
PA14_20530	-1.62194	7.2143	44.2067	2.38e-06	6.58e-05
ccpR	-1.62183	7.06409	39.9045	4.7e-06	0.00010881
PA14_33530	1.62017	5.53894	15.9906	0.00077355	0.00602895
rplC	1.61741	10.6926	55.0665	5.15e-07	2.44e-05
PA14_36730	1.61672	8.25318	31.3687	2.15e-05	0.00036378
fepC	-1.61448	4.24733	2.51578	0.129281	0.289661
phnF	1.61408	3.95734	2.2808	0.147503	0.317979
PA14_35700	-1.61376	8.028	45.1175	2.07e-06	5.97e-05
PA14_56200	-1.61344	7.02528	26.8495	5.37e-05	0.00072361
tnpS	-1.61337	8.38562	67.7931	1.12e-07	8.76e-06
PA14_05600	1.61282	5.95584	25.3093	7.51e-05	0.00093505
PA14_59170	-1.61116	6.57675	47.7208	1.41e-06	4.56e-05
PA14_50600	-1.60961	4.09844	3.27005	0.0864761	0.219959
prpB	1.60959	6.60551	13.5893	0.00157648	0.0103194
clpS	-1.60697	9.7832	53.2789	6.52e-07	2.8e-05
PA14_54830	-1.60239	7.4981	30.9007	2.35e-05	0.00038954
PA14_68280	1.60131	7.32625	37.9648	6.5e-06	0.00014051
PA14_59190	-1.60107	8.44542	76.5327	4.48e-08	4.61e-06
PA14_37410	1.6002	4.77467	7.66222	0.0122766	0.0508933
PA14_36740	1.59802	7.8248	30.8301	2.38e-05	0.00039134
PA14_61010	-1.59464	9.01796	30.4401	2.57e-05	0.00041557
PA14_28850	-1.59418	6.13047	29.4667	3.13e-05	0.00047551
PA14_38560	1.59263	4.94033	12.8691	0.00549333	0.0271867
PA14_37340	1.59087	5.45436	18.4307	0.00039572	0.00359793
PA14_34600	-1.59028	5.94718	34.6582	1.16e-05	0.00022329
PA14_56560	-1.58777	5.86643	6.80861	0.0172756	0.0668021
phzC1	1.58716	6.84734	2.00915	0.172609	0.353387
pcaG	1.58686	4.28448	5.24198	0.0337162	0.110902
PA14_23570	-1.58607	3.96582	3.39121	0.0812763	0.210254
PA14_14550	-1.58255	7.77557	64.1552	1.69e-07	1.17e-05
PA14_51310	1.58166	4.36709	2.42643	0.135872	0.299613
PA14_62250	-1.58127	6.91813	38.5844	5.85e-06	0.00013182
PA14_37170	1.58124	5.50769	8.17575	0.0100634	0.0435317
PA14_62790	-1.58084	4.84604	7.97326	0.0108777	0.0462263
PA14_38210	1.57948	4.23937	6.311	0.0212304	0.0779238
PA14_29190	1.57941	4.10366	1.84186	0.190702	0.375572
PA14_61380	-1.57907	9.5643	39.0792	5.39e-06	0.00012262
pilP2	-1.57893	3.35275	1.35697	0.258538	0.462993
nirF	-1.5784	6.75429	29.6874	2.99e-05	0.00046204
PA14_13090	1.5779	6.59209	26.6621	5.59e-05	0.00074307
pvdQ	1.57786	6.22336	21.1765	0.00019655	0.00208672
ohr	-1.57348	5.49851	13.1166	0.00182625	0.0114484
PA14_18660	1.57247	8.43547	40.9249	3.98e-06	9.7e-05
katE	1.57197	9.22	44.6324	2.23e-06	6.22e-05
glmS	1.57097	8.134	37.0781	7.57e-06	0.00016009
PA14_48810	1.56849	5.78878	18.0274	0.0004406	0.00391906
PA14_50650	1.56822	4.7979	8.27741	0.00968054	0.0423104
PA14_54040	1.56813	6.84631	49.8565	1.04e-06	3.68e-05
PA14_21470	-1.56795	3.99498	3.74536	0.0680425	0.185497
proA	1.56794	6.52258	30.149	2.73e-05	0.00043662
PA14_69770	-1.56387	9.26713	42.5658	3.06e-06	7.93e-05
cupA1	1.56325	4.21305	2.94191	0.102639	0.247167
PA14_65920	1.5627	3.88233	2.25119	0.186042	0.37021
PA14_60020	-1.56079	9.108	35.9022	9.29e-06	0.00018662
phnE	1.55719	5.62752	11.5371	0.00304108	0.0172231
tonB	-1.55609	7.75523	10.6474	0.00410851	0.0219071
pauA	1.55602	4.44984	7.38907	0.0145957	0.0585015
PA14_52560	-1.55586	4.7695	8.00248	0.0107558	0.0458517
PA14_21570	-1.55385	8.25299	27.0619	5.14e-05	0.00071103
PA14_58580	-1.55198	5.64003	18.6028	0.00037813	0.00348915
PA14_15770	-1.55067	6.36904	41.7987	3.46e-06	8.85e-05
greA	1.54873	8.12525	58.5819	3.3e-07	1.72e-05
PA14_55260	1.54844	4.26979	2.49235	0.186042	0.37021
PA14_54030	1.54793	3.90687	2.27897	0.147656	0.318181
PA14_67340	-1.54759	4.96417	10.3991	0.00447695	0.0235422
PA14_28070	1.5475	5.75297	10.3814	0.0045045	0.0235478
PA14_69600	-1.54695	7.54682	61.4562	2.33e-07	1.41e-05
PA14_64180	1.54565	8.22391	66.0903	1.36e-07	1.01e-05
pvdH	1.54521	5.63078	13.9491	0.00141175	0.00956891
PA14_31300	-1.54511	6.53999	34.5545	1.18e-05	0.00022679
pslK	1.54509	3.75819	2.11397	0.162346	0.339345
PA14_01270	1.54245	6.43865	16.3702	0.00069464	0.00555247
PA14_56520	-1.54228	3.73073	3.18386	0.0904126	0.226855
PA14_24710	-1.54198	4.48891	7.37484	0.0137506	0.0558702
PA14_53390	1.54162	5.17113	11.9009	0.00316927	0.0177071
fepD	-1.54009	3.39192	1.49731	0.240056	0.439189
PA14_69980	-1.53795	8.236	73.5649	6.06e-08	5.28e-06
PA14_22340	1.53689	8.42698	17.327	0.0005326	0.00452672
PA14_18810	-1.53641	5.91813	19.1661	0.00032636	0.00313854
PA14_13940	-1.53504	8.02615	40.1021	4.55e-06	0.00010736
PA14_39650	1.53461	3.49329	1.43066	0.24643	0.447808
PA14_01340	1.53319	5.48927	14.0595	0.00141496	0.00957971
PA14_39180	1.53304	3.89436	3.25054	0.0873492	0.221325
PA14_60150	-1.53303	3.74516	1.7718	0.198976	0.385837
PA14_47610	-1.5329	5.96328	12.815	0.00200848	0.0124198
PA14_16660	-1.53247	8.21341	38.5405	5.9e-06	0.0001323
gidB	1.53242	6.97106	43.1766	2.79e-06	7.4e-05
PA14_27870	-1.53212	7.49536	58.7025	3.25e-07	1.72e-05
PA14_55790	-1.53032	6.66453	28.3297	3.94e-05	0.00056652
ldh	-1.52779	8.27234	49.6945	1.06e-06	3.73e-05
PA14_68720	1.5275	4.19081	5.01905	0.0372697	0.119527
PA14_27190	-1.52459	5.67655	10.359	0.00453971	0.023632
PA14_32670	1.52405	3.60532	1.17532	0.291932	0.500003
PA14_19020	1.52336	5.10651	11.1577	0.00345295	0.0190459
PA14_60480	-1.52094	6.855	11.3724	0.00321276	0.0178666
PA14_34420	1.52037	4.31027	3.52773	0.0758486	0.199435
PA14_65820	1.51956	3.74168	1.67947	0.21058	0.400217
nqrC	1.51825	5.75575	17.5319	0.00050365	0.00435442
PA14_31380	-1.51676	6.56527	32.4529	1.75e-05	0.00031243
glyA	1.51585	7.34131	39.9255	4.68e-06	0.00010881
PA14_40660	1.51452	4.02474	2.06401	0.167142	0.346079
pscO	-1.51417	3.03439	1.11481	0.304335	0.514023
PA14_13190	-1.51335	8.36383	72.3734	6.86e-08	5.89e-06
glcC	-1.51223	6.52025	31.5348	2.08e-05	0.00035625
PA14_60810	-1.51186	4.75285	13.4853	0.00162796	0.0105169
PA14_51480	-1.51062	5.36528	4.40858	0.0494045	0.147145
hpaA	1.50938	6.06446	16.1083	0.00074805	0.00586947
PA14_30680	-1.50735	4.10714	1.9643	0.177243	0.359788
PA14_49010	-1.507	3.1738	1.13841	0.299413	0.508958
uppS	1.50697	8.02321	28.814	3.57e-05	0.00052432
PA14_28350	1.50601	6.71686	22.9646	0.00012803	0.00145581
hitA	-1.50576	6.71775	43.9732	2.46e-06	6.76e-05
PA14_64930	-1.5051	6.70653	41.7025	3.51e-06	8.93e-05
rplF	1.50496	10.3555	50.5885	9.4e-07	3.46e-05
PA14_55810	-1.5047	9.84467	82.6869	2.46e-08	3.74e-06
mmsA	1.50115	8.98848	28.0837	4.15e-05	0.00059036
PA14_22220	-1.50032	3.83543	2.78149	0.111823	0.263397
PA14_31470	-1.49891	7.47054	38.3334	6.11e-06	0.00013377
PA14_30740	-1.49658	3.98697	3.35549	0.0827704	0.212725
PA14_28560	1.49622	4.67761	3.51828	0.0762103	0.20012
pilY1	-1.49552	10.1303	87.1799	1.63e-08	3.02e-06
PA14_03590	1.49512	7.43745	51.7274	8.03e-07	3.17e-05
PA14_30050	1.49259	9.13283	38.298	6.14e-06	0.00013377
PA14_67380	-1.49228	4.27243	7.75688	0.0118305	0.0494246
PA14_16880	-1.49104	3.89954	2.36001	0.141034	0.308595
modB	-1.48882	5.26685	10.8314	0.00385735	0.0208114
PA14_27930	-1.48863	6.11821	26.9888	5.22e-05	0.00071547
PA14_38395	1.48781	3.52692	1.94357	0.186042	0.37021
PA14_46100	-1.48613	4.78448	8.22787	0.00986502	0.0429565
PA14_48600	1.48594	5.31573	13.9488	0.0062964	0.0305236
PA14_53550	1.48591	3.84154	2.59103	0.124027	0.281961
PA14_63960	-1.4853	5.38439	10.9033	0.00376388	0.0204
algL	1.48367	4.06178	2.96714	0.101277	0.244883
PA14_42000	-1.48266	3.49613	1.54956	0.228397	0.423631
rplN	1.48257	8.7961	30.6713	2.46e-05	0.00040038
PA14_50660	1.48247	5.48074	23.5582	0.00012352	0.00141259
PA14_29410	1.48064	5.51288	10.233	0.00474382	0.0243945
ccmA	1.47995	5.39721	18.7064	0.00036796	0.00342198
prtN	-1.47746	5.47246	14.5013	0.00119493	0.00841711
lppL	-1.47651	4.41103	3.54469	0.0752042	0.198137
PA14_49650	1.4763	6.9953	42.9452	2.89e-06	7.6e-05
PA14_58710	1.47629	3.39658	1.29817	0.268766	0.474136
PA14_54010	1.47624	4.787	4.63382	0.0444656	0.13741
PA14_39520	1.47545	7.59387	33.5575	1.42e-05	0.00026619
PA14_58515	1.47378	4.2247	5.41372	0.0312404	0.104586
truB	1.47317	8.58002	75.8361	4.8e-08	4.74e-06
PA14_59510	1.47275	3.31722	1.00331	0.329148	0.540579
PA14_17650	1.47228	4.4718	6.54317	0.0192706	0.0726202
rmlD	1.47223	6.99752	46.4154	1.71e-06	5.18e-05
PA14_59230	-1.47071	5.64506	19.9656	0.00026586	0.00266494
PA14_49080	1.46978	5.24623	10.7122	0.00401801	0.0214826
PA14_68260	1.46541	9.96575	23.7767	0.00010606	0.0012574
PA14_21000	1.46526	6.0355	13.6279	0.00155782	0.0102312
PA14_16160	1.46427	5.04013	11.4328	0.00314857	0.0176296
pscQ	1.46339	3.42867	1.49733	0.236102	0.43383
PA14_68150	-1.46194	3.70994	1.69486	0.208587	0.39745
PA14_29030	1.45993	4.90595	12.0109	0.00412569	0.021979
PA14_04220	-1.45708	4.46345	3.26152	0.0868569	0.220454
pth	1.45584	6.62584	25.5015	7.2e-05	0.00091304
PA14_00590	1.45548	5.38318	12.0246	0.00349409	0.0192549
PA14_72690	1.45544	6.95464	29.4457	3.14e-05	0.00047551
rpsA	1.45517	12.038	39.7348	4.83e-06	0.00011095
rpmJ_1	1.45415	6.79037	20.3592	0.00024074	0.00245885
PA14_39210	1.45372	3.70324	1.8051	0.194988	0.38022
lpdG	1.45343	9.7245	54.8577	5.3e-07	2.47e-05
PA14_37150	1.4528	4.72869	2.75344	0.114731	0.267269
groEL	1.45267	11.4444	23.7739	0.00010613	0.0012574
PA14_09300	1.44885	5.94205	10.1712	0.00484768	0.0248208
PA14_35150	1.44811	5.16399	8.41821	0.0126348	0.0520141
PA14_63700	-1.44733	3.22929	0.843738	0.369891	0.580921
nirQ	-1.44652	7.71244	58.4692	3.35e-07	1.72e-05
PA14_04050	-1.44635	6.52982	41.7851	3.47e-06	8.85e-05
PA14_15570	-1.4452	5.91998	16.6929	0.00063457	0.00519944
PA14_43600	1.44497	6.31679	25.0122	8.02e-05	0.00098997
PA14_08040	-1.44462	4.7344	10.007	0.00513596	0.0258093
PA14_39020	-1.44372	3.74849	2.21708	0.152969	0.325968
pheT	1.4436	8.11312	53.2297	6.56e-07	2.8e-05
PA14_63220	-1.44341	5.51285	6.33329	0.0210328	0.0773904
PA14_32490	-1.44112	6.00849	16.0507	0.00076041	0.00594284
PA14_73140	-1.44052	8.53512	60.532	2.6e-07	1.48e-05
PA14_37560	-1.44021	3.54809	1.22842	0.281604	0.488718
atpG	1.43994	9.29246	32.6826	1.67e-05	0.00030377
PA14_68120	1.43983	6.48275	13.0549	0.00186195	0.0116237
PA14_40330	-1.4398	3.03032	1.02251	0.324679	0.535392
PA14_42120	1.43907	5.51171	11.0421	0.00359064	0.0196621
PA14_02380	1.43828	4.10236	3.42781	0.114731	0.267269
PA14_72230	-1.43786	7.21056	27.2527	4.93e-05	0.0006893
PA14_37840	-1.43785	3.86338	2.53654	0.127806	0.287551
PA14_36400	1.43759	4.5126	2.34314	0.142383	0.310202
PA14_59920	-1.43692	5.11603	15.5294	0.00088309	0.00675891
PA14_19710	1.43538	5.9194	13.6814	0.00153236	0.0100976
acsA	1.43344	10.3713	17.0861	0.00056903	0.00479503
PA14_65190	1.43246	6.76254	22.5282	0.0001419	0.00158304
kdsB	1.43198	5.91934	12.249	0.00240778	0.0143642
PA14_33300	-1.43128	5.61704	13.7285	0.00151035	0.0100194
sucA	1.43121	10.4771	51.7169	8.05e-07	3.17e-05
PA14_06090	-1.43024	3.18531	1.02408	0.324318	0.535319
PA14_03010	-1.42924	6.03507	16.4957	0.00067055	0.0054267
PA14_46770	1.42645	5.77324	11.4013	0.00318186	0.0177489
PA14_33150	1.42627	5.60247	8.06181	0.0105129	0.0451291
PA14_58040	-1.42571	6.56585	11.8525	0.00274012	0.0159454
PA14_69520	-1.42542	7.99453	62.8452	1.97e-07	1.3e-05
PA14_28490	-1.42527	8.29959	46.0808	1.79e-06	5.39e-05
PA14_28180	-1.42415	7.0667	14.4825	0.00120168	0.00844876
PA14_48000	1.42166	3.99008	2.7262	0.115213	0.268076
PA14_31920	1.4209	5.76406	17.8059	0.00046763	0.0041041
PA14_15160	1.42089	3.77469	1.85297	0.189429	0.374188
hisC2	1.42079	6.70156	11.0019	0.00363985	0.0198549
PA14_27520	-1.42018	6.9539	12.2367	0.00241737	0.0144069
PA14_03490	-1.41964	5.36316	6.77301	0.0175292	0.067451
pqqF	1.41952	4.64476	6.53415	0.0257067	0.0897917
PA14_11630	-1.41936	6.14551	29.8602	2.89e-05	0.00045504
atpC	1.41883	7.83177	39.0619	5.4e-06	0.00012262
PA14_03200	-1.41767	6.97646	42.2732	3.21e-06	8.26e-05
PA14_21890	1.4175	6.5681	16.85	0.00060742	0.00501167
PA14_53660	-1.41694	7.06896	36.4661	8.42e-06	0.00017361
PA14_62050	-1.41652	4.72466	0.921504	0.349187	0.559032
PA14_46270	-1.41598	4.20747	4.41013	0.0493684	0.147112
PA14_51490	-1.41551	6.32533	20.6745	0.00022251	0.00230943
PA14_38110	1.41421	6.89146	36.598	8.22e-06	0.00017095
PA14_34550	-1.41406	3.73027	1.15303	0.296418	0.504454
PA14_59200	-1.4131	6.76161	25.3361	7.47e-05	0.00093495
PA14_36580	1.41292	7.37083	32.9992	1.58e-05	0.00028942
PA14_59845	-1.41288	6.06456	20.0964	0.00025721	0.00260462
PA14_08310	-1.41177	7.29444	41.3975	3.69e-06	9.26e-05
PA14_67190	-1.41145	5.82415	9.96924	0.00520503	0.0261089
PA14_55620	-1.41112	4.29415	1.42686	0.247036	0.448373
PA14_43840	1.41106	6.40208	19.682	0.00028577	0.00284518
PA14_44520	-1.41039	3.80683	1.82165	0.193044	0.378538
PA14_12920	1.40963	6.28664	8.65258	0.00840239	0.0381317
pqsE	1.40915	7.38831	18.4223	0.0003966	0.00359793
PA14_15270	-1.40878	3.2442	0.981394	0.334354	0.545044
PA14_46080	-1.408	4.22618	2.86332	0.107022	0.255232
PA14_67440	-1.40718	6.7673	32.9897	1.58e-05	0.00028942
pstB	1.4071	7.0388	11.8168	0.00277246	0.0160235
pabC	1.4063	7.07267	16.9874	0.00058474	0.00488579
PA14_39750	-1.40504	4.58387	4.12157	0.0566369	0.162635
PA14_60540	-1.40209	5.95843	17.0726	0.00057115	0.00479928
PA14_70430	1.40206	5.96836	13.4574	0.00164214	0.010551
PA14_64560	1.40188	3.73568	1.3796	0.25474	0.458687
PA14_40740	-1.40161	7.10147	32.1796	1.84e-05	0.00032707
PA14_19690	-1.40115	4.02845	2.09296	0.164342	0.342601
PA14_00130	-1.39896	5.73713	6.47137	0.0198541	0.074393
rpsM	1.39886	9.15134	44.6387	2.23e-06	6.22e-05
PA14_16740	1.39722	5.18278	9.61777	0.00895111	0.0399907
PA14_48560	1.39719	6.355	15.3019	0.00094339	0.0070475
nqrE	1.39679	5.50691	15.358	0.00092811	0.00698574
purL	1.39575	8.43903	46.7414	1.63e-06	5.1e-05
rplX	1.39507	8.76713	29.7475	2.95e-05	0.00045932
nqrB	1.3947	6.544	22.1434	0.00015551	0.00171872
glyS	1.39432	6.8867	21.6408	0.00017552	0.00189889
cyaY	-1.3938	6.12805	18.3504	0.00040423	0.00366159
rpsQ	1.39306	7.97498	32.723	1.66e-05	0.0003024
aphA	1.39125	4.77701	3.568	0.0743289	0.19719
PA14_05060	-1.38887	6.59615	37.0016	7.67e-06	0.00016107
PA14_69510	-1.38846	7.82063	41.6371	3.55e-06	8.99e-05
PA14_66890	-1.38818	5.19754	6.29913	0.0213365	0.0780422
PA14_08140	-1.388	3.28404	1.02646	0.323772	0.534567
PA14_34170	-1.38757	4.60519	8.57668	0.00864489	0.0389772
nusB	1.38545	6.60581	13.8163	0.0014702	0.00983011
PA14_33050	1.38522	5.52817	12.6291	0.0021309	0.0130677
glgP	1.38509	7.89931	26.9222	5.29e-05	0.00072068
PA14_56640	1.38423	3.99252	1.36646	0.256937	0.461102
PA14_52090	-1.38395	5.76839	19.112	0.00033097	0.00317261
PA14_38420	-1.38383	5.09247	9.21908	0.00681511	0.032324
PA14_33760	1.3823	5.64337	13.6308	0.00155644	0.0102312
PA14_13340	1.38198	7.26303	12.4744	0.00223905	0.0135701
PA14_04690	-1.38119	6.86855	46.8818	1.59e-06	5.02e-05
pscP	-1.38082	3.17546	0.986779	0.333065	0.543414
PA14_71110	1.37894	3.14283	0.824716	0.378238	0.587796
PA14_70160	-1.37838	7.27001	28.5209	3.79e-05	0.00054732
exbD2	1.37754	4.30216	2.18711	0.264719	0.470083
PA14_49020	-1.37709	6.45065	23.6381	0.0001095	0.00128956
fdx1	-1.37615	5.84285	9.91811	0.00530011	0.0265409
rplJ	1.376	10.4053	46.4391	1.7e-06	5.18e-05
PA14_32720	1.37582	4.45759	5.0526	0.0367087	0.11825
PA14_48890	-1.37442	5.1559	8.17771	0.0100559	0.0435317
PA14_50620	-1.37396	5.20035	6.44701	0.0200565	0.0748674
PA14_03166	-1.37205	7.85824	54.7299	5.38e-07	2.49e-05
PA14_27440	-1.37142	4.56123	3.33647	0.0835792	0.213969
argF	1.37103	6.36217	23.535	0.00011213	0.00131276
PA14_58840	-1.37072	6.64546	40.9512	3.96e-06	9.7e-05
PA14_18930	1.37003	4.38978	3.0515	0.0968747	0.237437
PA14_59070	-1.36968	6.61431	38.0402	6.42e-06	0.00013923
PA14_38840	-1.3694	3.80913	0.799629	0.382437	0.591413
PA14_39560	-1.36933	9.02876	27.751	4.44e-05	0.00062668
hscA	1.36863	8.19916	23.336	0.00011742	0.00136538
PA14_51070	1.36862	3.54057	1.10857	0.305653	0.514986
PA14_55450	1.36751	4.61309	2.37005	0.140239	0.307353
PA14_72060	-1.36738	6.78398	28.2008	4.05e-05	0.000579
PA14_01520	-1.36651	4.32131	2.93916	0.102788	0.247226
ampR	-1.3662	5.3899	9.10197	0.00711353	0.0334449
PA14_59550	-1.36509	9.36148	84.4211	2.1e-08	3.35e-06
PA14_03320	-1.3649	7.13107	27.8569	4.35e-05	0.00061445
mdcC	1.36448	3.32714	0.844819	0.369591	0.580757
norC	-1.36424	9.3616	50.6365	9.33e-07	3.46e-05
PA14_19205	1.36373	4.20498	4.64034	0.0445811	0.13748
PA14_12180	-1.3626	4.81525	3.99229	0.0602874	0.169664
secF	1.36043	7.72167	48.872	1.2e-06	4.02e-05
PA14_64940	-1.35988	5.84573	22.0468	0.00015915	0.00174269
PA14_67460	-1.3592	7.24252	36.0279	9.09e-06	0.00018345
PA14_67210	-1.35658	6.92893	27.9231	4.29e-05	0.00060748
PA14_37660	1.35605	6.35336	16.4166	0.00068564	0.00551114
PA14_32700	1.35535	4.084	2.36269	0.140822	0.308389
PA14_52330	-1.35483	5.99416	13.5487	0.00159634	0.010392
nuoF	1.35407	7.54793	39.4868	5.03e-06	0.00011514
PA14_46550	-1.35375	8.45502	43.6213	2.6e-06	7.07e-05
alg44	1.35346	3.72683	0.8649	0.364084	0.575003
PA14_59850	-1.35237	4.09019	4.53779	0.0464988	0.141697
PA14_30690	-1.35232	7.74213	36.5029	8.36e-06	0.00017321
PA14_11370	1.35141	4.10505	3.10053	0.0944193	0.233058
pelA	1.35116	6.94437	18.8228	0.0003569	0.00337201
PA14_70490	1.35104	5.97938	17.0446	0.00057558	0.00482969
PA14_59470	-1.35086	4.31971	6.33968	0.0209765	0.0772589
edd	-1.35059	7.81528	53.8558	6.04e-07	2.67e-05
PA14_36490	1.35001	5.74527	13.1347	0.00181592	0.0114332
PA14_36290	1.34914	4.97828	3.06014	0.0964363	0.236749
phaJ3	1.34784	4.51757	1.89971	0.18419	0.36861
PA14_64780	-1.34733	3.5713	1.32179	0.264594	0.470083
PA14_22460	-1.34682	5.37147	15.0628	0.00101172	0.00743605
PA14_01430	-1.34677	3.95794	1.43158	0.246284	0.447679
PA14_54120	1.34619	3.38817	0.839693	0.371016	0.582379
tktA	1.34547	8.52117	42.5597	3.07e-06	7.93e-05
PA14_03180	-1.34437	6.00267	18.5095	0.00038756	0.00354852
PA14_46760	1.3439	3.72854	2.07759	0.165821	0.344434
PA14_39710	1.34387	3.39175	0.927864	0.347568	0.557488
PA14_32480	-1.3428	5.80939	16.3867	0.00069143	0.00554266
PA14_36850	1.34247	6.3502	11.7321	0.00285092	0.0162863
PA14_34290	-1.34209	3.35699	1.31893	0.265096	0.470406
PA14_52960	-1.34133	5.15566	11.5509	0.00302718	0.0171937
phnN	1.34014	5.39903	14.1286	0.00159323	0.0103861
thiI	1.33972	7.08046	33.4509	1.45e-05	0.00026986
PA14_40560	-1.33959	10.1814	28.5629	3.76e-05	0.00054527
PA14_50240	-1.33843	9.83317	61.8083	2.23e-07	1.41e-05
aqpZ	1.33821	4.89753	6.16111	0.022615	0.0815903
PA14_71590	-1.33757	9.59807	53.3949	6.42e-07	2.78e-05
PA14_31840	1.33711	5.3323	12.6125	0.00375526	0.020372
PA14_51690	1.33679	9.30369	56.1397	4.49e-07	2.14e-05
PA14_44110	1.33509	4.47251	2.11696	0.162064	0.339127
PA14_37745	1.33427	8.24557	21.6374	0.00017566	0.00189889
PA14_62260	-1.33381	6.74755	31.7253	2.01e-05	0.00034733
hpd	-1.333	9.95118	67.9849	1.1e-07	8.69e-06
lasB	1.33275	13.2514	17.2325	0.00054658	0.0046315
PA14_36470	-1.33245	7.24488	52.7916	6.96e-07	2.92e-05
PA14_55780	-1.33205	6.73842	29.6788	2.99e-05	0.00046204
waaF	1.33173	7.43763	39.8997	4.7e-06	0.00010881
gatB	1.33089	7.41147	31.7299	2e-05	0.00034733
secD	1.33082	8.28288	51.6801	8.09e-07	3.17e-05
gabT	1.33019	8.6772	19.2517	0.0003192	0.00308977
PA14_00550	-1.32999	4.60759	5.62191	0.0285115	0.0972378
PA14_29690	1.32962	5.07889	7.8346	0.0114779	0.0482235
glnK	-1.32894	9.19178	50.085	1.01e-06	3.64e-05
PA14_21490	-1.3286	8.1505	53.383	6.43e-07	2.78e-05
PA14_67230	-1.32752	5.9352	10.392	0.00448803	0.0235437
PA14_61680	1.32722	5.29448	5.52793	0.0297084	0.100452
PA14_18820	-1.32689	3.98116	2.78521	0.1116	0.263289
fabA	-1.32652	9.37064	44.4747	2.28e-06	6.34e-05
PA14_68290	1.32458	7.72683	29.8974	2.87e-05	0.00045291
hisA	1.32446	6.11735	17.5087	0.00050684	0.00436414
PA14_44510	-1.32311	5.79557	14.7385	0.00111341	0.00797561
PA14_28460	-1.32243	6.3479	26.4252	5.89e-05	0.00077663
PA14_59800	-1.32144	7.24497	24.9063	8.21e-05	0.00101151
dxr	1.31941	6.97882	28.7461	3.62e-05	0.00052777
PA14_00470	-1.31809	9.03952	41.3054	3.74e-06	9.36e-05
PA14_45030	-1.31709	3.88562	2.5176	0.129152	0.289589
PA14_71200	-1.31585	3.21118	0.963298	0.33874	0.548428
dnaJ	1.31474	7.32808	18.064	0.0004363	0.00388672
sndH	1.31402	7.02682	17.449	0.00051515	0.00441004
PA14_59990	1.31337	3.96394	1.42732	0.246962	0.448373
putA	1.31312	9.03776	29.8465	2.9e-05	0.00045504
PA14_08050	-1.31291	7.65555	28.8433	3.55e-05	0.00052386
icp	1.31069	4.54723	2.92294	0.103677	0.248715
PA14_32440	-1.31049	4.318	2.89516	0.10522	0.251543
PA14_08660	-1.3103	3.37115	0.800227	0.382263	0.591413
pchG	1.30972	6.00094	1.47425	0.239613	0.438514
PA14_23240	1.30882	6.30685	24.573	8.85e-05	0.0010726
PA14_72890	-1.30817	7.28668	42.6503	3.02e-06	7.89e-05
PA14_15680	-1.30814	5.60418	17.8517	0.00046189	0.00406577
PA14_66100	-1.30813	6.73648	36.4299	8.47e-06	0.00017361
PA14_42970	-1.30809	4.58337	5.68129	0.0277835	0.0952486
lpd3	1.30781	6.19863	7.97548	0.0108684	0.0462199
phhA	-1.30766	10.0759	71.7783	7.3e-08	6.18e-06
pvdN	1.30725	5.12611	6.45367	0.0200009	0.0747555
PA14_34390	1.3065	3.96036	1.62151	0.218302	0.409766
PA14_58860	-1.30615	5.01521	7.67652	0.012208	0.0506799
bioD	1.30577	4.39127	2.6774	0.118306	0.273341
PA14_04000	1.30573	6.07263	22.6364	0.00013831	0.00154596
arcC	-1.3051	8.61952	17.7025	0.00048087	0.00419097
PA14_05420	-1.30382	4.33884	2.60969	0.122763	0.280789
PA14_48590	1.30374	5.81667	3.94796	0.0616011	0.172216
nirG	-1.3037	4.96257	8.02305	0.0106709	0.0455762
PA14_34610	-1.3037	3.16785	1.00218	0.33274	0.543414
PA14_37510	-1.30368	3.37331	1.17612	0.291773	0.499999
PA14_07980	-1.3035	4.43285	4.3266	0.0513561	0.151285
PA14_06580	-1.30237	7.02563	21.5672	0.00017867	0.001921
xylX	-1.30137	4.00894	2.48647	0.131401	0.293051
PA14_38320	1.30136	6.35758	14.0437	0.00137169	0.0093401
hemE	1.30091	5.53094	7.01527	0.015883	0.0623119
PA14_29260	-1.30041	5.34818	15.1324	0.00099128	0.0073404
PA14_24350	1.30035	4.30455	2.23697	0.151237	0.323323
hisQ	-1.29947	3.55367	1.20848	0.285423	0.493245
PA14_01680	-1.29938	3.30386	1.15733	0.295547	0.504268
PA14_12270	1.29859	5.43336	13.5779	0.00167304	0.0107122
cupD5	-1.29772	5.46046	11.9444	0.00265878	0.0155638
PA14_10920	-1.29722	3.26273	0.923226	0.348748	0.558675
PA14_44430	-1.29696	6.21451	18.9005	0.00034972	0.00332542
arcA	-1.29656	9.38633	36.1821	8.85e-06	0.00018008
PA14_22510	-1.29656	3.9036	1.75406	0.201142	0.388765
rpsG	1.29652	10.3253	35.5984	9.81e-06	0.00019545
PA14_42670	1.29616	7.87022	48.5923	1.24e-06	4.13e-05
PA14_37760	1.29461	6.17635	19.6877	0.00028535	0.00284518
PA14_51860	-1.29426	7.90582	30.0963	2.76e-05	0.00044002
rplK	1.2941	10.5604	48.5242	1.26e-06	4.13e-05
hcnA	1.29391	6.19125	14.5853	0.00116533	0.00830737
bkdB	-1.29294	7.07503	34.6673	1.16e-05	0.00022329
PA14_60040	-1.29276	6.23797	23.1452	0.00012274	0.00140916
PA14_71820	1.29187	5.89939	13.8431	0.00145823	0.00977213
PA14_19800	-1.29184	4.81757	7.2649	0.0143664	0.0577995
PA14_36690	1.29137	6.23976	8.27624	0.00968483	0.0423104
nirE	-1.29074	5.60736	8.35276	0.00940727	0.0414032
PA14_56620	-1.29066	4.53882	4.92846	0.0388343	0.123287
PA14_56870	1.28937	5.05021	11.2239	0.00395696	0.0212059
PA14_44950	1.28872	6.77302	23.8408	0.00010451	0.00124824
pilP	-1.28861	6.48388	21.6167	0.00017654	0.00190499
pilT2	-1.28807	4.66801	2.65718	0.119617	0.275081
PA14_07660	-1.28779	9.73831	64.3826	1.65e-07	1.15e-05
PA14_13200	-1.28692	5.97308	15.088	0.00100427	0.00739044
PA14_59590	-1.28424	6.81418	38.5161	5.92e-06	0.00013234
tufA	1.28234	12.2894	15.7157	0.00083687	0.00644686
catC	1.28196	3.44161	0.746987	0.398256	0.605555
PA14_47420	1.28158	4.81566	7.06733	0.0472442	0.143012
rplE	1.28118	10.1637	30.8537	2.37e-05	0.00039134
guaB	1.28089	8.6246	42.969	2.88e-06	7.6e-05
PA14_21020	1.28021	9.6534	31.936	1.93e-05	0.00033955
PA14_38090	1.27915	4.84478	5.89424	0.0253405	0.088919
PA14_10910	1.27888	3.71407	1.14675	0.2977	0.506484
PA14_24245	-1.27812	5.31154	11.8374	0.00275375	0.0159792
PA14_34580	-1.2771	3.22624	0.858297	0.365882	0.57738
PA14_02110	1.27657	3.90877	2.40149	0.137783	0.302755
PA14_26020	1.27641	10.6379	15.9868	0.00077438	0.00602895
PA14_53970	1.27559	7.37865	14.2573	0.00128583	0.00884697
PA14_25960	1.27479	6.05191	12.7753	0.00203398	0.0125513
PA14_29470	1.27438	6.56487	14.4489	0.00121385	0.00848635
rne	1.27417	9.81574	50.5637	9.43e-07	3.46e-05
PA14_47370	1.274	3.83292	1.48869	0.237409	0.435691
PA14_52510	1.27277	3.4707	0.992312	0.331747	0.542955
cupB2	-1.27209	3.87299	1.34826	0.260021	0.464526
PA14_48530	-1.27203	6.96676	15.1162	0.000996	0.00736617
PA14_35230	-1.27198	3.50012	1.07685	0.312483	0.522629
PA14_65840	1.27186	3.41117	2.00572	0.373657	0.583769
PA14_28540	-1.27182	4.01917	1.29146	0.269967	0.475977
PA14_59160	-1.27152	5.67083	17.4584	0.00051383	0.00440514
PA14_54130	-1.27124	4.76496	7.79373	0.0116619	0.0488578
PA14_13900	-1.26926	5.91559	15.6437	0.0008544	0.00656241
lspA	1.26923	6.11058	13.7057	0.00152096	0.0100448
PA14_47860	-1.26893	3.82848	1.69668	0.208354	0.397132
PA14_49860	-1.26892	3.88932	2.36843	0.140367	0.307519
cysG	1.26855	6.47981	11.8342	0.00275659	0.0159792
pilG	-1.2685	8.89504	49.8311	1.04e-06	3.68e-05
PA14_66530	1.2685	3.92759	2.06335	0.167206	0.346079
PA14_45480	1.26838	6.60267	24.7508	8.5e-05	0.00103868
PA14_63740	1.26829	3.33973	1.58823	0.373657	0.583769
etfB	1.26792	9.23707	37.5032	7.03e-06	0.00014985
PA14_11210	1.26773	5.75966	6.17753	0.0224585	0.0811245
nqrD	1.26732	5.73226	17.3584	0.00052804	0.00450091
mtlD	1.26588	3.63926	1.19617	0.287817	0.495936
PA14_48310	1.26585	4.0946	2.07074	0.166486	0.34545
trpI	1.2644	4.03463	3.03036	0.0979562	0.239197
PA14_28210	1.26425	4.64358	8.65584	0.00948256	0.0416109
pvdA	1.26425	6.56192	5.42904	0.0310298	0.104207
PA14_59700	-1.26352	4.92813	1.12463	0.302273	0.512205
PA14_43200	1.26296	5.46664	9.11019	0.00709212	0.0333707
PA14_01840	1.26292	3.89697	1.30917	0.266813	0.472243
PA14_27690	-1.26279	3.72597	1.0781	0.31221	0.522407
PA14_30720	-1.26243	4.66807	3.92664	0.0622448	0.173524
fimU	-1.25909	5.65285	16.4389	0.00068135	0.00549903
pldA	-1.25903	6.75656	25.2718	7.57e-05	0.00093844
pheA	1.25879	7.74764	28.3112	3.96e-05	0.00056731
pyoS3I	-1.25722	8.4902	40.6777	4.14e-06	0.00010015
PA14_16630	1.25711	11.0669	18.6437	0.00037408	0.00345718
PA14_49310	-1.2556	6.79376	14.6855	0.00113107	0.00809232
metK	1.25476	9.49849	28.7735	3.6e-05	0.00052612
oprM	1.25337	8.50731	49.9812	1.02e-06	3.65e-05
PA14_66050	1.2533	5.16767	9.80197	0.00552338	0.0273126
PA14_03285	-1.25273	5.86482	16.0874	0.00075251	0.00589663
folA	1.25267	4.33844	2.50251	0.130236	0.291007
PA14_07550	1.25244	7.05548	25.9037	6.59e-05	0.0008506
PA14_58360	1.25167	7.587	31.2882	2.18e-05	0.00036609
PA14_12450	1.25143	7.2904	26.2432	6.12e-05	0.00080239
PA14_02870	1.25101	4.44942	2.55729	0.12635	0.285143
metH	1.25051	8.31301	45.6392	1.91e-06	5.64e-05
PA14_66460	1.24962	8.04758	17.2894	0.00053811	0.00456703
PA14_01250	1.24959	6.7031	8.96736	0.00747476	0.034757
PA14_62240	-1.24934	6.31505	16.7039	0.00063263	0.00519742
PA14_33970	-1.24925	4.7931	5.19453	0.034439	0.112613
PA14_59100	-1.24912	5.70862	16.2844	0.00071167	0.00565895
PA14_53810	-1.2485	6.07165	16.9354	0.00059322	0.00494263
PA14_08250	-1.24817	3.92997	2.25783	0.184551	0.368969
PA14_42680	1.24805	6.46912	22.8921	0.00013023	0.00147229
PA14_64280	-1.24803	3.41584	1.08818	0.31002	0.520123
PA14_56960	-1.24457	5.70755	11.803	0.00278503	0.0160804
ureB	1.24412	3.40783	0.755485	0.395637	0.603438
argB	1.24411	7.8913	25.9429	6.53e-05	0.00084522
PA14_51920	1.24307	4.73944	2.55837	0.126275	0.285082
PA14_36550	1.24281	5.09973	5.39299	0.031528	0.105144
PA14_32840	-1.24272	5.63983	9.90963	0.00531607	0.0265821
gnyD	-1.24226	9.46771	30.0065	2.81e-05	0.00044554
PA14_64500	-1.24136	6.47526	26.6634	5.59e-05	0.00074307
PA14_09960	1.24034	4.24002	2.2222	0.152521	0.325246
PA14_24920	1.23814	5.50736	10.2672	0.00468744	0.0241885
PA14_39860	1.2375	6.0486	11.8311	0.00275941	0.0159792
PA14_46540	-1.23746	9.48007	54.9322	5.24e-07	2.47e-05
PA14_21440	-1.23721	6.84105	24.5158	8.96e-05	0.0010834
PA14_03550	-1.23703	3.37225	0.71438	0.408554	0.615532
carB	1.23568	10.4392	29.4527	3.13e-05	0.00047551
PA14_14540	-1.23542	5.14692	7.85497	0.0113875	0.0479224
PA14_59880	-1.2347	3.95698	3.27724	0.0861571	0.219363
PA14_56360	1.23377	4.55532	4.95026	0.038451	0.122333
PA14_05880	-1.23321	6.25212	15.8947	0.00079502	0.00616451
PA14_26390	-1.23315	3.5358	1.7592	0.200512	0.387927
gnuT	-1.2327	5.74906	15.4977	0.00089122	0.00679485
PA14_52840	-1.23248	4.62874	5.42021	0.031151	0.104436
PA14_11010	-1.23161	4.85129	5.14176	0.0352637	0.114844
PA14_56720	1.23075	4.93128	4.33138	0.0512399	0.151211
PA14_44120	1.23033	6.30654	23.6412	0.00010942	0.00128956
PA14_60630	1.22982	5.23194	6.55343	0.0191889	0.0723584
PA14_30260	-1.22981	7.45227	43.7885	2.53e-06	6.92e-05
rbsK	1.22943	6.45315	15.362	0.00092701	0.00698574
PA14_14910	1.22942	8.00203	16.8656	0.0006048	0.00499694
PA14_06390	-1.22761	5.92449	15.7665	0.00082476	0.00636182
phnL	1.2272	4.68683	1.45723	0.242245	0.442373
fruA	-1.22647	4.20396	2.09238	0.164397	0.342601
PA14_19720	1.22565	4.50805	3.06748	0.0960663	0.236042
PA14_68030	-1.22465	3.57034	1.20014	0.287042	0.495032
PA14_59930	-1.22441	3.79158	1.92553	0.181374	0.364842
PA14_65080	1.22404	7.6609	25.4508	7.28e-05	0.00092134
PA14_70530	1.22336	4.1076	2.18354	0.155945	0.329909
PA14_40750	-1.22316	6.11166	8.67868	0.00832075	0.0378879
PA14_15530	-1.2229	3.53755	1.20086	0.286901	0.494934
wbpZ	-1.2225	8.62821	47.3365	1.49e-06	4.78e-05
PA14_31620	-1.22242	4.04767	2.03466	0.170039	0.349823
PA14_38340	-1.22172	6.56112	29.9278	2.85e-05	0.00045137
PA14_00660	1.2216	5.00812	6.37048	0.0207078	0.0767664
def	-1.22096	8.04951	48.2583	1.3e-06	4.27e-05
PA14_15500	-1.22064	4.57899	4.73662	0.0424011	0.132691
PA14_19450	1.22041	5.29809	9.60522	0.00592597	0.0290368
PA14_07140	1.22011	5.81677	15.3392	0.00093318	0.00698883
bkdR	-1.21974	5.16981	10.2894	0.0046512	0.0240854
PA14_61410	-1.21961	6.3536	20.0201	0.00026222	0.00264631
sodM	1.2193	6.35676	8.62388	0.00849319	0.0384367
PA14_44930	-1.21778	4.67504	4.87037	0.0398768	0.125989
toxA	1.21718	4.91847	4.92593	0.038879	0.123363
PA14_03380	-1.21694	7.85458	46.6263	1.65e-06	5.13e-05
PA14_29340	-1.21568	3.25235	0.738297	0.400961	0.607648
PA14_39830	1.21532	3.75771	0.856427	0.366393	0.577503
cdsA	1.21399	6.50615	22.6464	0.00013798	0.00154521
pilW	-1.21324	7.64343	50.158	9.97e-07	3.62e-05
PA14_48650	1.21228	4.14644	1.88854	0.185426	0.369605
PA14_04240	-1.21199	5.05513	8.55713	0.00870862	0.0391722
PA14_13960	-1.21175	3.96436	1.51112	0.234035	0.431505
PA14_20510	-1.21148	7.18725	40.4098	4.33e-06	0.00010375
PA14_43580	1.21121	4.83753	5.29634	0.0329091	0.108609
PA14_19930	-1.21002	4.83761	4.67624	0.0436002	0.135655
PA14_56590	-1.20972	9.3824	16.1818	0.00073262	0.00578672
PA14_71420	-1.2096	4.65695	5.54744	0.0294553	0.0996535
rrmA	1.20914	4.50189	3.84998	0.0646242	0.178727
PA14_71350	-1.20902	4.09693	2.16327	0.157778	0.332271
PA14_58690	-1.20875	9.71395	44.812	2.17e-06	6.17e-05
PA14_70300	-1.20863	4.62086	3.99735	0.0601396	0.169576
PA14_60410	1.20862	6.36352	29.604	3.04e-05	0.00046658
rimJ	1.20836	4.01114	1.89401	0.184819	0.369172
PA14_63680	1.20812	3.15677	0.55257	0.468812	0.670346
ribC	1.208	6.39437	17.9819	0.00044601	0.00394941
PA14_12810	-1.20791	5.44195	10.3794	0.00450764	0.0235478
exbB1	-1.20658	4.57633	5.3374	0.0323142	0.107063
PA14_40010	1.20582	5.58021	7.86637	0.0113372	0.0478017
bkdA1	-1.20576	8.07292	20.807	0.00021531	0.00224554
PA14_39480	-1.2056	9.32188	30.031	2.79e-05	0.00044457
PA14_22740	-1.20509	5.26792	13.3945	0.00167446	0.0107122
PA14_02260	-1.20417	7.92563	31.4705	2.11e-05	0.00035849
pslH	1.20406	4.02868	1.98331	0.175261	0.357267
PA14_24630	-1.20401	4.37424	3.9963	0.0601701	0.169576
PA14_37400	1.20354	3.86921	1.89941	0.184224	0.36861
potA	1.20337	3.8363	1.03815	0.321102	0.531492
selB	1.20305	5.99483	16.2287	0.00077448	0.00602895
PA14_03170	-1.20303	5.76321	13.7227	0.00151303	0.010026
PA14_68970	1.20298	4.42297	2.08214	0.165381	0.343761
pilQ	-1.20279	9.55025	61.404	2.34e-07	1.41e-05
PA14_01200	-1.20238	5.22966	11.5655	0.00301253	0.0171434
PA14_72710	1.20105	7.00088	31.8067	1.97e-05	0.000346
PA14_47520	-1.19961	5.68016	6.99541	0.0160112	0.0626824
PA14_07260	1.19929	4.85686	5.29695	0.0329002	0.108609
PA14_45150	1.19872	4.95295	4.83386	0.0405484	0.127703
PA14_56370	-1.19844	5.85089	14.3851	0.0012373	0.00861313
PA14_54750	-1.19752	5.96164	15.7066	0.00083908	0.00645546
ltaA	1.19715	6.24728	14.5676	0.0011715	0.00832131
PA14_04020	1.19578	4.1384	1.82905	0.192183	0.377734
PA14_02100	-1.19447	4.25082	1.91311	0.182722	0.366557
PA14_29270	1.19331	5.28204	10.3307	0.00458479	0.0238248
PA14_03163	-1.193	10.1936	47.3223	1.49e-06	4.78e-05
sdaB	-1.19209	4.46467	3.70918	0.0692732	0.187728
PA14_15810	1.19177	3.86143	1.32269	0.264437	0.470004
PA14_72170	-1.19168	4.78843	6.40952	0.0203725	0.0758481
PA14_59870	-1.19165	3.47224	0.782679	0.387427	0.59665
PA14_53670	-1.19158	7.54253	31.365	2.15e-05	0.00036378
PA14_51080	1.19125	3.59723	1.15565	0.295886	0.504454
PA14_24780	-1.19024	5.518	5.36868	0.0318692	0.105936
pilN	-1.18972	6.59287	26.9646	5.24e-05	0.00071616
PA14_21980	1.18929	5.29583	7.83669	0.0114686	0.0482187
gatA	1.18909	7.13479	28.1178	4.12e-05	0.00058763
PA14_10040	1.187	5.59111	9.72528	0.00567656	0.0279766
PA14_46700	1.18654	4.61662	1.97127	0.176513	0.358842
pagL	-1.1865	10.371	31.2642	2.19e-05	0.00036675
PA14_15400	-1.18631	5.38219	6.88795	0.0167253	0.0649286
PA14_66020	1.18621	5.75321	6.11866	0.0230255	0.0826183
pilC	-1.1858	9.48385	29.1719	3.32e-05	0.00049872
alr	1.18561	5.46059	8.81032	0.00792237	0.0364556
PA14_49630	1.18514	4.47641	4.54465	0.0463499	0.141462
PA14_43050	-1.18492	8.8289	30.5385	2.53e-05	0.00040871
PA14_36780	1.18397	5.73604	9.41473	0.00634725	0.030745
PA14_06860	-1.18378	6.32211	13.9058	0.00143053	0.00964237
PA14_31160	-1.1837	3.86542	0.834665	0.372422	0.582886
PA14_46480	-1.1833	3.59575	1.36908	0.256496	0.460529
PA14_31030	-1.18322	5.27616	12.4397	0.00226414	0.0136726
nirL	-1.1826	5.4297	8.15966	0.0101256	0.0437519
cyoD	-1.18122	3.90082	0.81992	0.376589	0.5857
PA14_07355	-1.18115	5.92986	9.75464	0.00561735	0.0277079
PA14_14690	1.17932	6.50012	17.701	0.00048107	0.00419097
PA14_29575	-1.17725	5.66795	19.971	0.0002655	0.00266494
ppiB	-1.17707	7.6998	52.0444	7.7e-07	3.16e-05
PA14_27680	1.17675	3.33477	0.808254	0.379935	0.589328
sahH	1.17585	8.99631	28.8782	3.52e-05	0.00052314
PA14_57130	-1.17466	7.8505	45.8092	1.87e-06	5.56e-05
PA14_46780	1.17456	5.49967	2.41326	0.136877	0.301323
gltD	1.17415	6.98098	17.1459	0.00055974	0.00472349
PA14_08020	-1.17375	4.26515	3.28931	0.0856243	0.218449
PA14_64060	1.17336	4.47759	3.1383	0.0925782	0.230434
PA14_17760	1.17184	4.81838	6.08459	0.023361	0.0836196
PA14_26070	1.17155	3.19221	0.554986	0.46544	0.667706
PA14_47890	1.17151	4.21784	1.84112	0.190787	0.375614
PA14_33750	1.16992	4.61079	1.46693	0.240741	0.440169
PA14_38180	-1.16912	6.22363	16.6992	0.00063345	0.00519742
PA14_37360	1.16899	3.59941	1.06961	0.314071	0.524103
pdxH	1.16754	6.56343	14.5805	0.00116699	0.00830919
PA14_13470	1.16697	4.94573	6.76638	0.0175769	0.0675366
PA14_60050	-1.1666	6.41962	23.293	0.00011859	0.00137216
PA14_02680	1.16624	3.3396	0.611448	0.443918	0.650426
PA14_59410	-1.16587	3.90849	1.65354	0.213991	0.404365
PA14_35810	-1.16504	8.73231	52.571	7.17e-07	2.99e-05
PA14_29330	-1.16489	6.69073	27.1059	5.09e-05	0.00070774
PA14_31240	-1.16442	6.40387	14.3864	0.00123682	0.00861313
holA	1.16425	5.70605	10.7553	0.00395911	0.0212059
PA14_31200	-1.16375	3.68316	1.10149	0.30716	0.51723
pqsB	1.16372	8.18819	23.2206	0.0001206	0.00139001
sucB	1.16294	8.97594	34.9462	1.1e-05	0.00021477
PA14_54700	1.16211	5.01343	4.43261	0.0488487	0.146083
PA14_48800	1.162	7.34243	16.3879	0.00069119	0.00554266
PA14_32570	1.16004	4.5952	3.72155	0.0688496	0.187008
PA14_47260	1.15998	3.19551	0.581651	0.455069	0.65961
rpsJ	1.15926	10.1554	27.5299	4.65e-05	0.00065174
PA14_39470	-1.15908	8.94772	22.8267	0.00013224	0.00148656
PA14_55000	-1.15908	4.43994	1.9855	0.175034	0.356936
typA	1.15831	8.56043	25.3071	7.51e-05	0.00093505
PA14_33590	1.15772	4.89014	6.41792	0.0203013	0.0756382
PA14_56470	-1.15716	3.5663	1.23609	0.280152	0.487962
PA14_53650	-1.15575	5.43116	10.2788	0.00466853	0.024133
PA14_24770	-1.15567	9.57127	40.0207	4.61e-06	0.00010837
PA14_30410	-1.15376	9.15939	29.8254	2.91e-05	0.00045504
PA14_42780	-1.15352	8.2904	41.1571	3.83e-06	9.47e-05
metF	1.15268	6.54456	17.4642	0.00051303	0.00440458
mmsB	1.15267	7.06557	12.0586	0.00256144	0.0150985
PA14_35240	1.15178	3.45821	0.816698	0.377509	0.586972
PA14_42080	1.15126	7.63445	10.018	0.00511617	0.025759
PA14_03370	-1.15113	5.67175	10.5451	0.00425598	0.022491
PA14_43240	1.15098	4.84514	5.79682	0.0264266	0.0915229
PA14_14210	1.15093	5.73527	13.4635	0.001639	0.0105423
PA14_39610	1.14946	6.15173	13.0796	0.00184756	0.0115697
PA14_10470	1.14907	4.18179	2.78994	0.111317	0.262829
PA14_49850	-1.14827	4.8035	6.21555	0.0221006	0.080204
cobC	-1.14749	3.45438	0.860733	0.365217	0.576484
PA14_15100	-1.14703	6.68647	21.5725	0.00017845	0.001921
purA	1.14678	9.84096	33.5583	1.42e-05	0.00026619
bioB	1.14594	8.35114	30.8964	2.35e-05	0.00038954
metN	1.14576	5.89755	9.56487	0.00601253	0.029388
PA14_53680	-1.1457	3.44379	1.00274	0.329282	0.54065
metZ	1.14306	7.07568	18.7568	0.00036313	0.00339301
PA14_44960	-1.14287	3.98842	1.80747	0.194708	0.379925
pyrH	1.14282	8.33648	26.7499	5.49e-05	0.00073269
PA14_35070	1.14276	5.64341	13.2263	0.0017646	0.0111921
popD	-1.14265	4.07539	3.11848	0.0935391	0.231832
PA14_69580	-1.14244	5.65575	19.066	0.00033495	0.00320556
PA14_02560	-1.1414	3.94944	1.80003	0.195589	0.380891
PA14_33890	-1.1399	5.59257	10.1195	0.00493646	0.0250159
exoT	-1.13867	5.63161	12.6985	0.00208424	0.0128214
PA14_17600	-1.13835	5.42468	3.36708	0.0822821	0.211765
PA14_03330	-1.13829	4.76625	2.8244	0.109275	0.259144
pilO	-1.13813	6.8507	25.9893	6.47e-05	0.00083855
PA14_73150	-1.13763	6.60701	16.8928	0.00060025	0.00496632
PA14_33410	1.13662	4.09829	1.84267	0.190609	0.375512
PA14_05820	1.13657	7.20032	23.8078	0.0001053	0.00125518
eno	1.13649	9.60402	46.7023	1.64e-06	5.1e-05
PA14_52020	1.13619	6.52522	23.1604	0.00012231	0.00140693
PA14_22120	-1.13532	6.15029	9.1833	0.00690476	0.0326447
PA14_56810	-1.13518	5.86022	16.1323	0.00074299	0.00583749
PA14_29590	-1.13492	8.64823	44.1518	2.4e-06	6.6e-05
PA14_34850	1.13459	4.67487	4.63499	0.0484726	0.14554
PA14_25500	1.13231	5.59262	12.0905	0.00253496	0.0149722
trmB	1.13212	5.83502	11.8312	0.00275932	0.0159792
PA14_69030	-1.13184	6.96643	23.263	0.00011942	0.00137907
truD	1.13161	6.01806	18.2637	0.00041365	0.00372982
PA14_23650	1.13104	5.02248	1.97222	0.176414	0.358808
PA14_58210	1.13104	4.23471	3.52229	0.0760567	0.199805
PA14_11150	1.13024	3.34039	0.767484	0.391982	0.600769
nqrA	1.1292	7.43892	22.8754	0.00013074	0.00147526
PA14_44180	1.12908	4.56002	2.144	0.159544	0.335156
nuoN	1.12886	6.4577	18.8639	0.00035308	0.00334666
arnT	1.12868	3.45344	0.959618	0.374907	0.584307
gcvH2	-1.12797	5.77781	16.5789	0.0006551	0.00531616
PA14_68710	1.12784	6.55495	17.6177	0.00049205	0.00426783
PA14_21450	-1.12765	5.7844	5.2044	0.0342873	0.112416
PA14_28080	1.12723	3.1899	0.554185	0.465758	0.667914
pvdS	-1.1266	7.55705	16.1501	0.00073923	0.00582343
rpsH	1.12593	10.5639	36.0186	9.1e-06	0.00018345
PA14_59150	-1.12544	6.28074	13.8164	0.00147016	0.00983011
PA14_53620	-1.12543	5.44592	8.4747	0.00898317	0.0400725
PA14_60350	1.12509	6.19912	21.138	0.00019842	0.00209728
PA14_03340	-1.12508	6.05775	15.4348	0.00090762	0.00686687
aguR	1.12495	4.42166	3.49668	0.077045	0.20194
PA14_26330	-1.12434	4.25123	2.05192	0.168328	0.347862
PA14_56840	1.12232	4.6612	3.34997	0.0830043	0.212957
PA14_04870	1.12094	6.76016	19.3833	0.00030853	0.00303111
lysS	1.12077	7.63005	19.3348	0.00031242	0.00305158
alkB1	-1.12072	6.07314	18.0194	0.00044154	0.00392158
PA14_30030	-1.11987	4.12771	1.83629	0.191344	0.376586
gltS	1.11945	3.84081	1.28503	0.271124	0.4769
wrbA	1.11906	5.75495	13.7708	0.00149088	0.00994588
PA14_11740	-1.11903	6.09603	18.8756	0.000352	0.00334177
irlR	-1.11874	4.27337	3.7648	0.0673919	0.184146
PA14_31800	1.11871	6.8209	17.4647	0.00051295	0.00440458
PA14_18160	1.11863	5.09813	7.87663	0.0386518	0.122906
PA14_08240	-1.11834	6.2991	13.8956	0.00143502	0.00966029
PA14_34670	1.11653	6.20252	5.92275	0.0250323	0.0882162
PA14_26150	-1.11605	4.52251	5.99996	0.0242187	0.0860657
PA14_43820	1.11568	4.2619	2.16854	0.157299	0.331615
pilB	-1.11527	9.12881	28.8289	3.56e-05	0.00052409
PA14_34280	1.11518	3.38388	0.669283	0.423484	0.629857
PA14_13970	-1.11486	4.70109	3.59452	0.0733475	0.195461
PA14_31730	1.11394	4.05043	1.74069	0.202793	0.390809
nadD	1.11339	6.53199	16.9373	0.0005929	0.00494263
PA14_06980	1.11304	7.2395	18.7737	0.00036152	0.00339301
PA14_37670	-1.11279	5.75691	16.1531	0.00073861	0.00582343
PA14_01330	-1.11241	5.75666	14.9965	0.00103165	0.00755436
rbsC	1.11227	6.42696	13.9084	0.00142939	0.00964237
PA14_49060	1.11201	4.62738	2.3621	0.140868	0.308389
PA14_68010	1.1114	5.14438	5.88605	0.0254298	0.0890872
PA14_33920	1.11129	4.11176	2.63732	0.126803	0.285802
PA14_55080	-1.11105	9.10051	26.7513	5.49e-05	0.00073269
arsC	1.11077	3.73155	1.12095	0.303043	0.513053
PA14_55090	-1.11004	7.10569	32.0899	1.87e-05	0.00033071
PA14_16180	1.10963	7.16702	17.9981	0.00044407	0.00393813
fabG_3	1.10873	8.26518	36.2521	8.74e-06	0.00017849
PA14_47250	-1.10774	4.13719	3.39258	0.0812197	0.210199
PA14_71890	1.10721	7.54502	7.27035	0.0143351	0.0577303
nirN	-1.10697	6.37188	12.981	0.00190579	0.0118716
PA14_20000	1.10647	4.10423	1.2374	0.279905	0.487962
rnpA	1.10644	9.42373	48.5255	1.26e-06	4.13e-05
PA14_22590	-1.10631	4.10831	1.87111	0.187374	0.372022
PA14_71330	-1.10609	3.89211	2.78817	0.111423	0.262975
hpaC	1.10589	4.5844	2.41035	0.162936	0.34023
PA14_18630	1.10541	7.50304	33.3615	1.47e-05	0.00027258
PA14_00510	-1.10402	6.8433	26.3769	5.95e-05	0.00078301
prpC	1.10395	7.89115	21.5207	0.00018071	0.00193932
PA14_00760	1.10312	4.68005	3.8544	0.0644841	0.178507
PA14_32905	1.10201	3.92171	0.635177	0.435349	0.640748
PA14_00810	-1.10173	4.3461	1.31562	0.265675	0.470841
PA14_67650	1.1017	4.87738	4.4012	0.0495767	0.147584
bioF	1.10109	5.69001	8.41915	0.00917364	0.0407076
PA14_35080	1.10102	4.92725	4.3867	0.0499169	0.148373
ggt	1.10087	7.02811	21.259	0.00019262	0.0020523
PA14_01030	1.10074	6.0241	9.50359	0.00614671	0.029945
PA14_18890	1.10024	4.24817	3.35083	0.0829676	0.212957
PA14_43040	-1.10023	6.7105	12.2969	0.00237078	0.014188
PA14_62040	-1.09932	7.07067	20.6728	0.0002226	0.00230943
PA14_20520	-1.09864	7.37352	23.1317	0.00012313	0.00141087
PA14_05400	-1.09741	5.20398	10.3246	0.00459446	0.0238541
PA14_37570	-1.09725	5.22959	8.04409	0.0105847	0.0454048
PA14_63820	1.09701	6.48634	2.03913	0.169595	0.34909
PA14_68400	-1.09683	11.1592	26.8503	5.37e-05	0.00072361
PA14_12780	-1.09664	7.26917	41.474	3.64e-06	9.18e-05
PA14_36260	1.0962	4.78147	4.74493	0.0422391	0.132254
nasA	-1.09582	3.67137	0.765773	0.3925	0.600769
PA14_02610	1.0954	3.7809	0.909064	0.374907	0.584307
sspA	1.09535	5.772	11.9651	0.00264081	0.0154893
PA14_32600	1.0949	4.64921	3.6045	0.0729817	0.194771
PA14_02190	-1.09451	3.77351	0.900171	0.354697	0.564251
PA14_28370	-1.09447	5.22144	6.78048	0.0174756	0.0673119
PA14_49730	-1.09423	3.97861	1.30859	0.266915	0.472283
rsmA	-1.09317	10.2622	30.7743	2.41e-05	0.00039454
PA14_57240	1.09191	6.28457	13.4699	0.00163576	0.0105423
PA14_34740	1.09153	4.62687	3.75265	0.0677977	0.184999
mexC	1.09135	3.59036	0.799726	0.382409	0.591413
PA14_61980	1.08987	4.37681	1.81945	0.193301	0.378538
PA14_08210	-1.08965	5.49897	7.7137	0.0120317	0.0500884
ahpC	1.08961	11.6261	10.8649	0.00381355	0.0206126
PA14_14940	1.08946	6.39974	20.5133	0.00023163	0.0023864
murB	1.08914	5.98572	12.3662	0.00231837	0.0139432
PA14_35300	-1.0891	5.34282	13.0511	0.00186421	0.0116248
PA14_02630	-1.08523	4.3119	1.67834	0.210727	0.40024
PA14_04300	-1.08435	10.0123	24.8799	8.26e-05	0.00101538
PA14_07480	1.08433	8.95978	21.2496	0.00019307	0.00205336
oprL	1.08396	10.5238	28.4898	3.81e-05	0.00054948
PA14_28150	1.08218	5.41028	6.36835	0.0207262	0.0767868
PA14_69820	-1.08101	4.35785	3.48924	0.0773348	0.202355
PA14_32770	1.08066	5.9924	9.21506	0.00682512	0.0323451
pslO	1.08021	3.81131	1.23106	0.281103	0.488688
flgM	-1.07967	9.64022	26.9625	5.25e-05	0.00071616
PA14_69050	-1.07768	6.30106	20.2356	0.00024833	0.00253207
glyQ	1.07755	6.12149	7.17346	0.0149022	0.0594481
PA14_28260	-1.07525	5.65569	8.57013	0.0086662	0.0390407
PA14_44990	1.07484	3.4604	0.988353	0.332689	0.543414
PA14_03190	-1.07449	7.41841	29.0103	3.43e-05	0.00051404
feoB	-1.07446	6.0702	12.3956	0.00229651	0.0138398
rbfA	1.07257	6.73547	17.5223	0.00050498	0.00435442
PA14_68430	1.07251	5.45408	6.34092	0.0209656	0.0772589
PA14_55720	1.07197	3.45963	0.681729	0.419281	0.626278
PA14_30830	-1.07136	8.48457	45.0048	2.11e-06	6.02e-05
PA14_42910	-1.07133	4.68724	3.86127	0.064267	0.178155
PA14_15360	-1.07058	7.80116	18.8314	0.0003561	0.00336985
pykF	1.07015	3.7557	1.02343	0.324468	0.535326
PA14_30430	1.07008	5.63019	9.62962	0.00587431	0.0288313
PA14_34150	1.06891	5.49636	6.35724	0.0208228	0.0770801
PA14_53600	-1.06865	6.61238	10.5721	0.00421653	0.0223623
PA14_04140	1.0685	7.31832	19.2137	0.00032236	0.0031102
PA14_57200	1.06848	6.31595	17.9619	0.00044841	0.00396472
PA14_66190	1.06723	6.78361	12.6074	0.00214569	0.0131192
PA14_44360	-1.06718	6.25731	17.2278	0.00054727	0.0046315
PA14_67410	-1.06627	4.70038	2.20239	0.154264	0.327783
PA14_55800	-1.06601	5.3757	7.65789	0.0122974	0.0509439
PA14_28895	1.06588	5.86625	14.4743	0.00120464	0.00844876
PA14_55390	1.06427	5.17598	1.30119	0.268229	0.473605
fdx2	1.06412	6.4059	12.0344	0.00258175	0.015188
hprA	1.06396	4.85696	4.30862	0.0517958	0.152202
PA14_36620	1.06381	5.56684	7.94239	0.0110082	0.0466806
PA14_01750	1.0637	6.47008	12.9953	0.00224117	0.0135701
PA14_20080	1.06339	4.97807	6.38642	0.0205702	0.0763999
PA14_71260	-1.06321	4.78415	6.37512	0.0206676	0.0766655
rfaD	1.06319	7.4106	22.7939	0.00013327	0.00149524
PA14_61220	1.06305	4.6163	1.66447	0.212545	0.402274
PA14_31930	1.06276	3.86479	1.98219	0.175377	0.357267
ihfA	-1.06272	9.80165	38.3797	6.06e-06	0.00013377
PA14_13870	-1.06229	4.62003	3.77229	0.0671429	0.183798
PA14_71430	1.06223	5.72288	13.2073	0.00182343	0.0114428
PA14_23110	1.06218	7.73212	12.1279	0.00250428	0.0148428
glnA	-1.06154	11.6235	23.8636	0.00010397	0.00124426
PA14_53410	-1.06102	4.78232	5.90472	0.0252267	0.0886902
PA14_11750	-1.06035	6.65624	11.7743	0.00281151	0.0161285
PA14_30970	-1.06019	6.48046	22.0884	0.00015757	0.00173178
PA14_27910	-1.05967	4.76049	4.71152	0.0428948	0.133953
PA14_58570	-1.0591	6.26329	18.5241	0.00038607	0.00354583
thiL	1.05879	5.2424	7.71834	0.0120099	0.0500328
PA14_63780	1.05861	5.6352	1.15527	0.374907	0.584307
cyp23	1.0585	6.21252	12.5188	0.00220739	0.0134394
PA14_22480	-1.05774	6.77712	14.8595	0.0010742	0.00781761
PA14_44910	-1.05756	7.57866	30.6525	2.47e-05	0.00040076
PA14_37690	-1.05753	7.87901	26.0947	6.32e-05	0.00082316
PA14_03250	-1.05726	6.42329	19.4832	0.00030071	0.00296897
PA14_26850	1.0568	3.82866	1.05498	0.317313	0.527876
PA14_46680	1.05657	5.44668	4.68567	0.0434104	0.135207
PA14_14300	-1.05594	4.1534	2.32851	0.143565	0.311987
PA14_42140	1.05563	5.92268	9.8273	0.0054738	0.0271809
PA14_52250	-1.05558	5.43278	4.88433	0.0396234	0.125322
PA14_60080	-1.05474	8.43363	36.7576	8e-06	0.00016685
PA14_43550	1.05434	5.90323	8.80902	0.00792619	0.0364556
PA14_43520	1.0543	5.70119	8.22682	0.00986898	0.0429565
PA14_28510	1.05392	3.52886	0.995781	0.330924	0.542444
PA14_13450	-1.05391	4.38168	3.14267	0.092368	0.230018
spuB	-1.05359	7.90376	8.03669	0.0106149	0.0454685
PA14_01180	1.05344	4.22667	1.6618	0.212898	0.402684
PA14_50280	1.05155	8.95211	14.8222	0.00108611	0.00784648
PA14_31950	1.05053	4.88709	4.98609	0.0378304	0.120943
phzH	-1.05036	7.50434	11.5177	0.00306071	0.0173115
PA14_09850	1.05019	5.10335	5.71992	0.0273212	0.0940434
PA14_37580	-1.05013	5.39429	8.4901	0.00893114	0.0399608
PA14_05850	-1.0497	4.49683	3.16466	0.091318	0.228499
PA14_03270	-1.04903	7.5609	31.6081	2.05e-05	0.00035317
PA14_71030	-1.04855	7.048	22.1265	0.00015614	0.00172245
PA14_23310	1.0485	7.97762	26.8549	5.37e-05	0.00072361
PA14_00910	1.04837	5.30398	2.72644	0.115198	0.268076
xcpZ	1.04765	5.07238	3.98394	0.0605325	0.170083
serC	1.04765	7.83873	18.1111	0.00043084	0.00386129
PA14_48400	1.04677	3.10514	0.41971	0.526924	0.720902
ribF	1.04659	6.39978	11.5401	0.00303803	0.0172223
PA14_27270	-1.04596	3.37774	0.559444	0.463679	0.666546
nosR	-1.04592	8.96307	11.9743	0.0026329	0.0154582
PA14_46600	-1.04478	5.56641	12.3518	0.00232918	0.013994
cyoE	1.04438	5.36612	9.71995	0.0125806	0.0518407
PA14_16710	1.04428	5.41213	10.0298	0.00655603	0.0314439
PA14_07630	-1.04424	4.39942	2.94279	0.102591	0.247167
tsf	1.04363	10.2649	15.1116	0.00099734	0.00736689
antA	1.04333	5.08285	2.34191	0.142481	0.310202
PA14_55060	-1.04314	5.94412	9.90897	0.00531732	0.0265821
PA14_11760	1.0431	5.57898	7.31964	0.0155363	0.0612357
PA14_44230	1.0427	4.08957	1.36258	0.257591	0.461854
PA14_34490	1.04258	5.50336	4.56927	0.0458207	0.140378
PA14_60200	1.0422	5.20335	4.37173	0.050271	0.149127
PA14_65220	-1.04201	7.09122	7.37065	0.0137736	0.0559251
PA14_58950	-1.04198	3.64855	0.731723	0.403027	0.60953
ssuB	1.0417	3.66618	0.952793	0.341324	0.550955
PA14_56770	-1.04161	3.82124	0.862975	0.364607	0.575675
phnA	1.04146	6.96525	7.85438	0.0113901	0.0479224
PA14_65810	1.04097	4.04923	1.07067	0.313838	0.524103
PA14_66490	-1.04068	4.3592	3.38763	0.0814245	0.210545
PA14_63390	1.04029	4.01286	1.52333	0.232225	0.428835
PA14_08260	-1.04025	4.32527	1.74227	0.215568	0.406567
PA14_15820	1.0394	4.14368	0.970008	0.337105	0.547354
PA14_37610	1.03901	4.93189	4.47948	0.0614871	0.171978
PA14_59380	-1.03836	5.92827	14.2641	0.00128319	0.00883906
mutS	1.03688	6.77513	18.7576	0.00036305	0.00339301
gnd	-1.03666	6.28956	17.9167	0.00045389	0.00400718
PA14_36680	1.03649	4.91151	5.15018	0.0351305	0.114474
PA14_65640	1.03649	5.17896	7.88265	0.0112658	0.0475685
PA14_41500	-1.03617	7.77491	13.3094	0.00171941	0.0109643
PA14_64450	1.03523	6.02483	12.9018	0.00195408	0.0121215
PA14_58880	-1.03474	5.9573	14.1947	0.00131036	0.00898446
PA14_43440	-1.03464	3.4588	0.705489	0.411433	0.618611
PA14_00150	-1.03416	4.33706	1.70615	0.207142	0.396481
PA14_07680	-1.03359	12.2917	20.6889	0.00022171	0.00230828
glyA1	-1.03219	4.31641	1.42642	0.247106	0.448373
betB	-1.03204	6.729	13.714	0.00151706	0.0100414
PA14_16960	1.03195	4.84662	2.39426	0.138343	0.303536
PA14_19950	-1.03171	5.98009	11.1026	0.00351788	0.0193679
PA14_00770	1.0312	4.54731	4.42196	0.0776424	0.20298
obgE	1.03116	8.21534	35.1188	1.07e-05	0.0002089
aceF	1.0309	8.31911	31.8232	1.97e-05	0.00034593
aroQ1	-1.03006	7.5923	23.1013	0.00012401	0.00141545
PA14_73410	1.02939	8.85955	28.5368	3.78e-05	0.00054686
PA14_21870	-1.02929	6.53765	14.5587	0.00117461	0.00832343
PA14_38970	1.02902	3.95751	1.50341	0.235189	0.432688
PA14_26640	1.02826	7.59772	16.5866	0.00065369	0.00531204
PA14_48190	1.02819	4.61093	4.82962	0.04869	0.145898
PA14_24360	1.02786	5.39356	5.33025	0.0324169	0.107284
PA14_11230	1.02769	4.18403	0.826883	0.374613	0.584307
PA14_15910	1.02764	4.58431	2.97733	0.100732	0.244065
PA14_08280	-1.02758	4.85766	2.76445	0.112856	0.265074
cheW	-1.02751	5.64657	7.4692	0.0132458	0.0542528
PA14_35720	-1.02746	7.0633	13.1626	0.00180008	0.0113685
PA14_42050	-1.02746	3.68691	0.668238	0.42384	0.630057
PA14_36540	1.02664	3.99241	1.56651	0.280306	0.487962
PA14_44480	-1.02646	8.16948	20.4387	0.00023599	0.00242293
PA14_40860	1.02551	10.6611	20.5311	0.0002306	0.00237993
treA	1.02531	6.44022	12.1937	0.00245135	0.0145655
PA14_55820	-1.02515	7.61803	23.3691	0.00011652	0.00135876
pyrQ	1.02428	5.16074	6.81169	0.0172539	0.0667617
PA14_35850	-1.02401	9.11321	30.837	2.38e-05	0.00039134
PA14_01220	-1.02334	5.09229	6.14709	0.0227497	0.0819135
PA14_49940	-1.02179	7.33746	12.4955	0.00222393	0.0135124
PA14_61950	-1.02171	5.97468	9.58785	0.00596307	0.0291703
PA14_09920	1.02136	3.83519	0.950444	0.341906	0.551442
napB	-1.02047	4.83296	2.1659	0.157539	0.332002
PA14_73020	-1.02043	3.49651	0.968711	0.33742	0.547354
fis	1.02024	6.05787	4.70681	0.0429882	0.134174
PA14_28420	1.01965	4.30494	2.75983	0.113137	0.265435
selA	1.01947	5.85092	9.1676	0.00694453	0.0328065
PA14_64430	1.01929	5.67155	10.5893	0.00624673	0.0303463
PA14_71210	-1.01791	3.73964	0.586253	0.453317	0.658092
rpsN	1.0176	9.11084	25.8698	6.64e-05	0.00085506
PA14_55220	1.01748	4.73177	3.31495	0.084505	0.216058
PA14_55590	1.01737	3.54769	0.746671	0.398354	0.605555
PA14_03210	-1.0168	4.54582	2.78018	0.111903	0.263478
PA14_68130	1.01656	6.68456	7.43796	0.0134106	0.0547891
PA14_55117	-1.0165	5.39637	10.0594	0.00504207	0.025464
PA14_17790	-1.01631	4.73357	5.39022	0.0315667	0.105175
PA14_70170	-1.0163	6.08405	8.41301	0.00919498	0.0407412
PA14_25840	1.01626	9.92881	19.4058	0.00030675	0.00302363
PA14_16620	1.01619	5.87785	4.66402	0.0438475	0.136181
PA14_56170	1.01495	5.84559	8.36284	0.00937138	0.0412759
morA	1.01487	7.21752	9.39186	0.00640005	0.0308997
rfaE	1.01454	7.14454	19.3625	0.00031019	0.00304175
xylS	1.01425	4.34556	2.53393	0.12799	0.287638
PA14_38900	1.01361	3.34692	0.483306	0.495378	0.692944
PA14_12840	-1.01345	7.54723	22.928	0.00012914	0.00146555
PA14_48030	1.01239	6.27552	9.05107	0.00724779	0.0339146
msuD	1.01207	3.23864	0.438024	0.516057	0.710959
PA14_35800	-1.01207	8.52084	37.2401	7.36e-06	0.00015623
PA14_22630	-1.01205	5.43599	9.05979	0.00722458	0.0338328
tyrZ	-1.01195	9.45522	29.4046	3.16e-05	0.00047824
PA14_62290	1.01185	4.74998	1.50904	0.234345	0.431808
PA14_52610	1.01148	6.00024	11.4605	0.0031196	0.0175307
rplT	1.01146	11.9252	19.2825	0.00031667	0.00307831
coxB	-1.01051	10.1917	25.318	7.5e-05	0.00093505
thrS	1.00963	9.67559	28.8468	3.54e-05	0.00052386
PA14_36960	1.0093	5.6527	8.56557	0.00868106	0.039078
PA14_04560	-1.00895	4.36642	2.82874	0.109021	0.258646
PA14_01960	1.00796	5.77747	10.3662	0.00452843	0.023594
pheS	1.00794	7.69059	33.6068	1.41e-05	0.00026619
cyoC	1.00775	4.89311	3.06887	0.0959963	0.236042
moeA1	-1.00734	5.10869	4.81509	0.0408987	0.128669
PA14_27950	-1.00726	8.46966	40.2205	4.46e-06	0.00010615
PA14_17730	-1.00699	5.48135	5.57567	0.0290935	0.0987086
PA14_49750	1.00629	6.94015	19.9539	0.00026665	0.00266834
PA14_19160	1.00436	4.23152	1.56563	0.226092	0.420524
cupC2	-1.00394	3.9581	1.31151	0.266401	0.471796
PA14_60110	-1.00329	8.67273	45.1	2.08e-06	5.97e-05
PA14_17370	1.0032	5.69113	10.4074	0.00446399	0.0235064
sdhB	1.00246	8.87301	26.8922	5.33e-05	0.00072199
PA14_01380	-1.00242	5.12274	4.79508	0.041276	0.129787
PA14_14380	1.00206	5.32536	7.2166	0.0148956	0.0594481
PA14_26010	1.0017	6.26371	7.14463	0.0150757	0.0598181
oprJ	-1.00163	4.16411	1.38485	0.253868	0.457395
PA14_47410	1.00158	4.9749	5.48028	0.030337	0.10231
PA14_30600	-1.00132	5.72166	11.024	0.00361262	0.0197596
PA14_34810	1.00108	7.34614	13.322	0.00171266	0.010933
cupD4	-1.00064	5.22911	7.16941	0.0149264	0.0595048
PA14_32930	0.999572	4.94879	1.80226	0.195325	0.380501
PA14_54050	0.998861	5.44339	9.23696	0.00677078	0.0321911
braZ	0.998544	4.64487	2.9225	0.103701	0.248715
PA14_27410	-0.997922	3.30556	0.572337	0.458648	0.662249
PA14_16380	0.997585	5.24587	4.42148	0.0491052	0.146623
PA14_46390	-0.996749	3.5357	0.721201	0.406366	0.613016
PA14_01460	-0.996625	5.2583	7.53728	0.0128944	0.0529359
PA14_02130	0.995394	3.43051	0.470424	0.50111	0.697647
PA14_59490	-0.995083	4.66006	3.14415	0.0922968	0.230018
PA14_40690	0.994777	5.52563	4.97163	0.0380794	0.121389
PA14_46150	-0.994517	8.03324	22.3717	0.00014726	0.00163677
cupB3	-0.994326	5.76167	10.6058	0.00416786	0.0221439
PA14_23640	0.994002	6.0396	9.53785	0.0060713	0.0296508
PA14_61300	-0.99382	9.32475	31.7708	1.99e-05	0.0003465
PA14_11610	-0.993699	3.93752	2.25827	0.149408	0.320453
PA14_61600	-0.992323	7.64169	32.89	1.61e-05	0.00029397
PA14_60240	-0.992246	4.32995	1.44264	0.244531	0.445039
phoU	0.992209	7.43578	16.4209	0.00068481	0.00551114
PA14_40050	0.991704	4.76687	3.31597	0.0844609	0.216039
PA14_57990	0.991597	6.17988	12.5233	0.00220423	0.0134394
cupB6	-0.991546	4.93625	4.49965	0.0473356	0.143069
rpsP	0.991458	7.20902	14.8115	0.00108957	0.00785234
PA14_04270	-0.991139	5.72775	8.25473	0.00976453	0.0425958
katA	0.991018	11.3302	6.69201	0.0181218	0.0692158
pobA	-0.99093	4.01615	2.33527	0.181019	0.364252
PA14_42130	0.990857	6.51012	15.1013	0.00100036	0.00738001
pcaF	0.990764	4.09026	0.827196	0.374524	0.584307
PA14_52940	-0.99055	5.80416	11.0847	0.00353922	0.0194493
pyoS3A	-0.990292	8.34237	20.6187	0.00022562	0.00233669
PA14_32780	-0.989915	4.20154	0.671523	0.422723	0.629357
PA14_53980	0.989555	5.34125	3.64673	0.0714587	0.191765
PA14_53590	-0.989459	8.44584	11.4553	0.00312499	0.0175307
PA14_54980	-0.989369	5.13633	3.3802	0.0817334	0.211067
trmA	0.989264	6.7174	11.2647	0.00333085	0.0184239
PA14_54680	-0.98885	3.6786	0.642132	0.432887	0.638076
PA14_51260	0.988738	7.53158	26.8937	5.32e-05	0.00072199
PA14_63070	0.988331	6.1338	10.7635	0.00394803	0.0212059
PA14_09660	-0.987602	6.94439	5.06227	0.0365487	0.117945
PA14_19940	-0.987566	5.80976	7.09685	0.0153684	0.0607759
PA14_53450	-0.987257	4.78259	5.12149	0.0355864	0.115451
PA14_31580	-0.987224	6.29814	8.08754	0.0104094	0.0447917
leuA	0.986665	9.08192	8.74773	0.00810905	0.037095
PA14_41930	-0.986305	8.36589	24.5712	8.85e-05	0.0010726
PA14_64530	0.986127	3.95119	0.674669	0.421657	0.628579
PA14_61270	-0.985951	4.84206	3.77144	0.0671712	0.183798
PA14_51640	-0.98554	4.15609	1.02232	0.324723	0.535392
tpm	0.985093	5.31743	5.70518	0.0274966	0.0944287
PA14_65580	0.984768	4.77931	3.14324	0.0923404	0.230018
PA14_50950	-0.984503	5.88072	8.70194	0.00824876	0.0376469
PA14_35750	-0.98422	7.15108	14.1004	0.00134829	0.00920475
PA14_10830	-0.984165	5.49609	8.60579	0.00855096	0.0386686
pdxA_2	0.984031	3.94189	1.9891	0.212136	0.401885
PA14_54870	-0.983399	7.41935	15.488	0.00089373	0.00680519
PA14_06800	-0.983361	3.46956	0.708706	0.410388	0.617667
PA14_09810	0.983326	3.87151	1.68905	0.212136	0.401885
PA14_24940	0.983259	5.0461	4.4347	0.0488007	0.146083
PA14_11600	-0.982734	6.11224	14.533	0.00118367	0.00836758
PA14_03520	-0.982722	4.50786	4.4191	0.0491603	0.146713
PA14_26610	0.982494	5.51995	6.39627	0.0204857	0.0761337
PA14_29560	-0.981596	4.24954	2.89894	0.105009	0.25124
PA14_59900	-0.981334	4.60281	1.49786	0.236022	0.433818
PA14_72810	-0.981225	6.16384	11.9766	0.00263091	0.0154582
PA14_64900	-0.980734	7.61976	23.7593	0.00010649	0.00125912
PA14_68510	0.980614	4.73457	2.53091	0.128204	0.288009
braB	0.980525	7.76919	27.0717	5.13e-05	0.00071103
cysW	-0.980223	5.25749	1.77065	0.199115	0.385855
PA14_18010	0.980011	6.61971	13.5425	0.00159941	0.0103955
flgL	-0.979887	7.96896	29.5148	3.1e-05	0.00047379
PA14_14830	0.979256	9.24787	17.2024	0.00055111	0.00465731
PA14_19770	0.979029	4.21219	2.16903	0.157254	0.331615
PA14_23950	0.977934	6.04739	5.16179	0.0349481	0.114005
PA14_59640	-0.977463	4.60663	1.51236	0.233852	0.431435
rsaL	-0.977192	9.61952	26.5566	5.72e-05	0.00075837
PA14_61820	0.976887	8.2673	19.1984	0.00032364	0.00311746
PA14_01860	0.97649	3.98141	0.821638	0.3761	0.585396
napE	-0.976415	6.11369	10.1549	0.00487549	0.0248344
cobK	0.976248	3.84655	1.13628	0.299852	0.509414
narK2	-0.976043	3.86768	1.72905	0.204245	0.393096
pilV2	-0.976006	6.01865	10.4766	0.00435813	0.0229694
PA14_26980	-0.975722	6.39162	13.2714	0.00173992	0.0110593
PA14_39000	-0.975629	3.45065	0.747738	0.398023	0.605363
PA14_06190	0.975582	5.31233	5.19953	0.0343621	0.112465
PA14_53540	0.975564	4.34873	2.44505	0.134466	0.297785
PA14_39080	0.975345	3.69211	0.872388	0.362062	0.573219
PA14_57480	0.975288	7.25859	16.8284	0.00061107	0.00503477
aroK	-0.975002	7.85817	28.0344	4.19e-05	0.000595
PA14_21460	-0.974671	4.12883	1.05176	0.318036	0.528678
PA14_68640	-0.974254	5.07886	5.65951	0.028048	0.0958779
hisF1	0.973888	6.12861	13.4276	0.00165734	0.0106258
PA14_48300	-0.973816	3.50461	0.72783	0.404258	0.611236
potD	-0.97378	4.47819	2.97894	0.100647	0.243958
algG	-0.973159	5.8906	13.1635	0.00179962	0.0113685
PA14_11620	-0.973052	3.75135	0.693596	0.415332	0.62182
PA14_18650	-0.972785	9.46102	33.9092	1.33e-05	0.00025268
PA14_01540	0.972707	4.98196	2.74375	0.114124	0.266825
PA14_67200	-0.971816	6.63984	10.1577	0.0048706	0.0248308
PA14_42900	-0.971363	5.79166	8.34682	0.0094285	0.041435
PA14_12610	0.970748	4.54433	2.96939	0.101156	0.244692
PA14_43100	-0.97032	8.52849	32.4558	1.74e-05	0.00031243
PA14_02140	-0.969876	3.3022	0.480043	0.496819	0.694546
bkdA2	-0.969503	7.10781	16.897	0.00059955	0.00496632
fahA	0.968915	7.33567	13.1454	0.00180983	0.0114179
uvrA	0.968113	7.67151	17.0809	0.00056985	0.00479513
PA14_30130	-0.967475	5.29995	9.82367	0.00548087	0.0271867
PA14_30160	0.966767	4.51815	3.23719	0.0975733	0.238557
PA14_21530	0.966567	5.99197	7.96111	0.0121805	0.050601
PA14_70310	0.965785	3.59467	0.782539	0.387468	0.59665
upp	-0.96541	6.51065	7.77749	0.0117359	0.0490984
PA14_27250	0.965383	3.5588	0.643335	0.432464	0.63761
pepA	0.965308	7.8914	14.9119	0.00105769	0.00770692
PA14_12740	0.964263	6.39539	9.06757	0.00720396	0.0337943
PA14_55980	0.96412	7.0607	12.4889	0.00222865	0.0135272
PA14_44380	0.964059	7.40855	11.8671	0.00272704	0.0158849
PA14_54090	-0.963302	5.02523	3.12631	0.0931579	0.2311
PA14_32710	-0.963301	4.80336	1.39909	0.251525	0.454417
ptsN	-0.963266	9.54672	37.7378	6.76e-06	0.00014552
PA14_30460	-0.963032	3.99019	1.12915	0.301331	0.511047
PA14_02270	-0.962941	7.5681	16.2379	0.00072107	0.0057184
PA14_28970	0.96282	3.58385	0.694473	0.415043	0.62182
wbpW	0.962638	8.18733	38.3551	6.08e-06	0.00013377
gltB	0.962608	8.80147	32.5713	1.71e-05	0.0003087
PA14_29710	-0.962524	6.91354	19.31	0.00031443	0.00306359
traJ	-0.9625	4.99524	4.24097	0.0534896	0.155635
PA14_03100	0.962382	4.08805	1.9483	0.178933	0.361405
frr	0.961942	8.65781	14.4692	0.00120649	0.00844876
PA14_31850	0.961484	6.14674	13.0548	0.00186206	0.0116237
tpiA	0.960828	9.37022	21.1391	0.00019837	0.00209728
PA14_31500	-0.960769	7.82567	18.4241	0.00039641	0.00359793
acnB	0.960731	9.67941	21.9528	0.00016278	0.0017723
PA14_68140	0.960322	6.26671	9.39591	0.00639065	0.0308795
PA14_14680	0.959433	7.94251	25.4337	7.31e-05	0.00092284
gltR	0.959226	5.55833	5.15283	0.0350888	0.114401
infA	-0.958971	7.6693	18.4717	0.00039145	0.00357307
phzA1	-0.958559	6.16194	4.39637	0.0518986	0.152352
PA14_70330	-0.958452	4.71869	2.45156	0.133978	0.29715
PA14_32470	-0.958252	4.62738	1.84581	0.190248	0.375308
argJ	0.958227	7.61813	22.152	0.00015519	0.00171839
exoU	-0.958039	8.48078	35.6468	9.72e-06	0.0001946
ptpA	0.95712	5.19281	6.49857	0.0196307	0.0736571
PA14_71800	-0.957078	6.07088	10.3814	0.00450451	0.0235478
PA14_64300	-0.956561	3.37874	0.697132	0.414167	0.621145
PA14_71880	-0.956479	4.803	1.94057	0.179758	0.362452
PA14_18790	-0.956422	3.45368	0.603681	0.446782	0.652387
znuB	-0.956339	4.6778	2.98216	0.100476	0.243743
PA14_38020	0.955595	3.92637	0.999177	0.330122	0.541729
PA14_14900	0.955553	7.18396	20.9103	0.00020988	0.00219278
PA14_27070	-0.953711	7.83315	15.3305	0.00093556	0.00699779
PA14_39150	0.953627	4.12187	1.85823	0.18883	0.373734
mreD	0.952004	5.06097	2.46077	0.133293	0.296518
PA14_28050	-0.951933	8.09791	18.7328	0.00036543	0.00340374
PA14_16820	0.951447	7.45921	10.5555	0.00424079	0.0224459
PA14_35740	-0.950753	8.45017	38.3164	6.12e-06	0.00013377
pqqB	0.950607	5.79279	8.83504	0.0144802	0.0581169
PA14_13560	-0.950193	4.18711	2.1778	0.156461	0.330555
mexB	0.950055	9.93399	18.5003	0.0003885	0.00355169
PA14_45410	-0.94954	4.72225	2.40014	0.137887	0.302759
PA14_46620	-0.949302	6.28785	10.3954	0.00448271	0.0235422
PA14_68440	0.949279	7.48454	10.1851	0.00482415	0.024743
PA14_31780	0.947921	3.97912	0.902683	0.354041	0.564033
PA14_39360	0.947745	6.70886	21.9459	0.00016305	0.0017723
PA14_22540	-0.947546	5.008	5.9932	0.0242886	0.0862108
PA14_00680	-0.94705	3.50451	0.512477	0.48281	0.683596
PA14_54810	-0.946694	6.7799	13.8834	0.00144035	0.00967418
PA14_48620	0.946437	4.04603	0.845285	0.369462	0.580757
PA14_42380	-0.946358	5.2257	5.97452	0.0244833	0.0866423
cupC1	-0.945592	5.12779	4.61416	0.0448734	0.138093
PA14_13460	-0.944934	4.14556	0.790946	0.384981	0.594475
PA14_21800	-0.944415	3.36191	0.581696	0.455051	0.65961
PA14_53630	-0.9443	3.83573	0.659061	0.426987	0.632209
PA14_14520	0.94417	5.01944	4.50522	0.0472123	0.143012
PA14_32640	-0.943865	4.03688	1.31823	0.265219	0.470406
PA14_33730	0.943296	5.62429	5.13649	0.0353473	0.11495
selD	0.943109	6.47511	11.9068	0.00269176	0.0157413
cysS	0.942475	7.82899	28.8024	3.58e-05	0.00052432
PA14_02290	-0.942178	4.59309	3.08019	0.095429	0.235256
PA14_17820	0.940083	3.45928	0.526232	0.477072	0.678553
PA14_46510	-0.939902	7.98652	22.0493	0.00015905	0.00174269
PA14_13650	0.939639	3.79709	0.819909	0.376592	0.5857
PA14_20070	-0.938807	4.72693	4.07099	0.058034	0.165477
nqrF	0.938068	6.70906	11.3228	0.00326658	0.0181022
PA14_54930	-0.937751	6.62558	13.5581	0.00159175	0.0103861
PA14_64920	-0.937076	8.64532	29.8206	2.91e-05	0.00045504
PA14_48210	-0.937013	3.63296	0.829834	0.373779	0.583769
PA14_62300	0.936439	5.79407	5.65066	0.0281564	0.0961374
PA14_35200	-0.936104	3.73923	0.684334	0.418409	0.625449
PA14_51190	0.936009	5.02453	5.86145	0.0472117	0.143012
valS	0.934786	8.58703	24.6794	8.64e-05	0.00105326
PA14_71740	0.934667	8.3522	24.8598	8.3e-05	0.00101784
ileS	0.933836	8.72544	15.8459	0.0008062	0.00623487
rubA1	-0.933813	6.19473	5.9845	0.0243791	0.0863767
PA14_72630	0.933579	5.10071	5.16186	0.034947	0.114005
kdgA	0.932997	5.34645	1.77873	0.198138	0.38459
PA14_13060	-0.932117	4.49658	2.50276	0.130217	0.291007
PA14_03390	-0.932015	4.99398	3.16298	0.0913976	0.228552
tig	0.931446	10.135	24.6663	8.67e-05	0.0010542
PA14_51570	-0.931323	5.73703	7.99675	0.0107795	0.045908
PA14_44980	0.93107	5.21593	5.02783	0.037122	0.119322
phzS	0.930863	7.47049	7.13136	0.0151564	0.0600578
cobU	-0.930715	3.2762	0.467645	0.502362	0.698848
PA14_69100	-0.930711	6.56827	9.53395	0.00607983	0.029668
PA14_41650	0.930658	5.38393	6.79504	0.0173718	0.0671301
PA14_10080	-0.930425	3.80407	0.567313	0.460598	0.664545
PA14_55040	-0.930296	5.33768	6.93025	0.01644	0.0640306
tauD	0.929682	3.41893	0.407113	0.531085	0.723585
glgA	0.929556	8.07781	19.3841	0.00030847	0.00303111
PA14_25990	0.928512	5.35417	5.45075	0.0307341	0.103389
PA14_23190	0.928255	4.11386	2.07365	0.166203	0.345105
PA14_54210	0.928227	8.73312	11.7637	0.00282132	0.0161483
PA14_21990	0.928025	6.6317	10.3193	0.00460292	0.0238771
PA14_61990	0.927878	6.72762	9.62276	0.00588878	0.0288784
PA14_31450	-0.927783	5.74924	8.02718	0.0106539	0.0455364
PA14_37470	-0.927588	3.17265	0.490101	0.4924	0.690271
PA14_72700	0.927037	6.46773	10.5421	0.00426042	0.0224944
nasS	0.926832	4.60242	2.52507	0.128619	0.288722
PA14_50030	0.92666	4.86698	3.37273	0.0820452	0.211429
mtnA	0.925301	5.73935	5.01977	0.0372576	0.119527
PA14_59440	-0.92509	4.51813	2.2638	0.148937	0.320024
PA14_62470	0.924734	4.80309	3.40873	0.0805553	0.208662
pilO2	-0.924398	4.85505	4.89767	0.0393828	0.124695
PA14_10300	0.92419	4.19075	2.37316	0.139993	0.306928
PA14_68955	0.923446	6.00958	8.6589	0.00838253	0.0381106
PA14_32790	-0.923198	8.40189	27.0339	5.17e-05	0.00071194
psd	0.922576	5.88142	11.3703	0.00321503	0.0178666
PA14_52380	-0.92193	6.27249	15.4597	0.00090108	0.00684361
PA14_54480	0.921871	6.035	10.7569	0.00395697	0.0212059
PA14_08160	-0.921815	4.27115	1.11685	0.303905	0.513647
rcsC	-0.921386	8.50335	28.8745	3.52e-05	0.00052314
PA14_24675	0.921308	5.93582	3.67028	0.0706251	0.190347
purE	0.921299	6.48469	11.331	0.00325761	0.0180694
trpF	0.920897	7.47141	22.1883	0.00015385	0.00170673
ribH	0.920716	6.74488	19.3316	0.00031268	0.00305158
PA14_26940	0.920368	5.35068	4.17814	0.0551199	0.159439
endA	-0.920131	4.10445	2.03437	0.170069	0.349823
PA14_24210	-0.919078	5.33556	5.58752	0.0289431	0.0983135
PA14_45100	0.918888	6.374	7.13417	0.0151393	0.0600301
PA14_42150	0.91883	6.28942	6.87461	0.0168165	0.0651969
PA14_45710	0.918388	5.23204	5.41538	0.0312175	0.104586
PA14_52930	-0.918379	4.94632	3.80941	0.0659257	0.181395
PA14_14310	-0.918204	6.1781	8.74855	0.00810659	0.037095
PA14_50790	0.917225	5.45622	10.1613	0.0111983	0.0473172
PA14_60730	0.916686	6.92694	8.45847	0.00903837	0.0402581
PA14_34450	0.916641	4.61111	3.03633	0.0976494	0.238584
PA14_61890	0.916632	5.39153	2.8364	0.108574	0.258076
crc	-0.915509	8.42129	30.6879	2.45e-05	0.00040017
sdhA	0.915457	9.34617	19.219	0.00032192	0.0031102
pilM2	-0.914847	5.03385	5.19412	0.0344453	0.112613
PA14_38660	0.914036	7.52975	9.06719	0.00720496	0.0337943
pilM	-0.914034	8.92616	31.3395	2.16e-05	0.00036454
PA14_26550	0.913935	5.98286	9.21292	0.00683046	0.0323451
PA14_21550	0.913761	6.67277	8.78584	0.00799479	0.0367141
PA14_48880	-0.913623	5.52725	7.05974	0.0156001	0.0614054
PA14_68080	0.913559	5.75417	9.86194	0.0111983	0.0473172
PA14_16800	0.912601	6.05018	8.96369	0.00748489	0.0347768
gcd	0.912253	7.20648	17.3962	0.00052262	0.00446755
PA14_21160	0.91202	4.73218	3.30965	0.0975733	0.238557
PA14_22210	-0.91193	4.41904	2.70278	0.116685	0.270816
PA14_31350	-0.911665	7.86306	19.3569	0.00031064	0.00304175
pchA	0.911048	6.8371	3.65935	0.0710107	0.190952
atpF	0.910913	9.20849	13.4775	0.0016319	0.0105309
PA14_48390	-0.910678	3.68958	0.678997	0.420198	0.627174
modC	-0.910639	5.74093	10.9284	0.0037319	0.0202986
PA14_11130	-0.910636	5.54409	10.1428	0.00489621	0.0248915
PA14_34200	0.910546	3.34929	0.451289	0.509843	0.705569
PA14_02360	-0.910409	3.65035	0.741366	0.400003	0.606505
PA14_46030	-0.909376	7.85287	17.709	0.00048003	0.00419097
lrp	-0.90917	6.30619	11.3918	0.00319198	0.0177719
pvdO	0.908661	5.43308	3.8115	0.0658579	0.181305
PA14_21030	-0.908393	10.5844	21.3995	0.00018612	0.00199023
PA14_17740	-0.908384	5.28506	5.00377	0.0375284	0.120042
spcU	-0.908018	7.00645	18.4261	0.0003962	0.00359793
PA14_70510	0.907319	3.73464	0.644285	0.43213	0.637435
exoY	-0.906543	6.23655	10.8522	0.00383015	0.0206835
PA14_10050	-0.904491	3.17272	0.396087	0.536642	0.727618
PA14_32590	0.904358	5.56365	5.06378	0.0365238	0.117945
livM	0.903961	6.24296	9.02452	0.00731892	0.0342204
PA14_18100	0.903677	5.57399	5.62313	0.0284964	0.0972378
PA14_16030	0.903531	6.45978	7.29333	0.0142042	0.0573592
PA14_55320	0.903452	6.50903	8.77087	0.0213024	0.0779947
PA14_56300	0.903064	7.04722	14.8169	0.00108782	0.00784929
ibpA	-0.902331	9.85926	13.131	0.00181802	0.0114332
PA14_14710	-0.901725	8.40591	15.3864	0.00092046	0.00695514
PA14_03470	0.901402	5.57436	3.90023	0.0630529	0.175521
PA14_33130	0.901099	6.06217	9.3363	0.00653034	0.0313499
PA14_07110	0.900608	8.76061	14.3419	0.00125347	0.00869505
PA14_48340	0.900491	3.82439	0.767543	0.391964	0.600769
PA14_16270	0.899743	6.14721	7.14575	0.015069	0.0598181
PA14_47640	-0.899406	4.08334	1.1766	0.291677	0.499999
PA14_31110	0.899057	3.76452	0.718993	0.407073	0.613925
PA14_03620	0.898863	4.09507	1.09388	0.308791	0.518503
PA14_53100	-0.898722	3.08485	0.380459	0.544708	0.734227
PA14_37460	-0.8987	3.27068	0.429125	0.520303	0.71499
mexR	-0.898571	7.50654	20.1762	0.00025208	0.0025614
hisM	-0.898244	4.08666	1.66847	0.212019	0.401885
PA14_34730	0.898133	5.69166	2.654	0.119824	0.275238
rbsA	0.898125	7.63287	14.2162	0.00130186	0.0089469
PA14_57190	0.897936	6.90559	18.6677	0.00037173	0.0034462
PA14_29540	-0.897821	3.40206	0.438677	0.515748	0.710698
PA14_56940	-0.897524	5.58372	6.46065	0.0199428	0.0746784
PA14_60030	-0.897488	8.57565	19.268	0.00031786	0.00308183
PA14_19960	-0.897469	3.86967	0.6629	0.425666	0.63133
PA14_01810	-0.897321	4.70818	3.02068	0.0984559	0.239944
PA14_05650	0.896947	3.46825	0.857614	0.371946	0.582604
PA14_64540	0.896915	3.67057	0.851739	0.36768	0.57883
PA14_51510	-0.895026	6.84213	10.923	0.00373881	0.0203013
PA14_58920	-0.894241	4.53911	2.99821	0.0996284	0.242182
PA14_09350	0.894087	4.33962	0.971603	0.336718	0.547354
PA14_05660	-0.893886	7.50947	14.7514	0.00110914	0.00795466
PA14_18080	-0.893316	6.60539	15.4649	0.00089973	0.00684209
lipA	0.893035	6.65284	4.24267	0.0534462	0.155585
ubiH	0.892833	6.68655	16.1995	0.00072896	0.00576553
PA14_40100	-0.892555	6.08387	5.89384	0.0253448	0.088919
bdhA	0.89206	4.69036	3.03659	0.117364	0.271502
PA14_46810	0.891821	4.72072	3.67887	0.0874981	0.221607
PA14_44450	-0.891341	4.33788	2.51106	0.12962	0.290091
PA14_51550	-0.891081	6.47146	11.8256	0.00276448	0.0159929
bglX	0.890905	6.61119	13.2832	0.00173353	0.0110387
PA14_54900	-0.890892	6.11484	7.28224	0.0142673	0.0575353
PA14_39790	-0.890816	4.38476	2.09104	0.164525	0.342647
PA14_72050	0.890709	5.21394	3.55867	0.0746779	0.197792
PA14_43300	0.890617	5.88094	5.24278	0.0337042	0.110902
PA14_58010	0.890051	5.49998	6.27453	0.0215583	0.0786886
PA14_18985	-0.889581	5.73065	4.52069	0.0468717	0.142321
PA14_66160	0.888888	7.13836	11.7541	0.00283032	0.0161842
PA14_48410	0.888865	4.10871	1.81911	0.193341	0.378538
PA14_12900	-0.888157	9.75564	31.6714	2.03e-05	0.00034992
PA14_54940	-0.887887	6.64292	18.0756	0.00043495	0.00388052
PA14_28880	-0.886756	4.20914	1.90935	0.18484	0.369172
plcN	0.886518	6.29483	4.32972	0.0512801	0.151211
PA14_18720	-0.886252	8.00946	17.6836	0.00048335	0.00419844
PA14_33840	0.886048	4.8212	2.41152	0.137011	0.301506
PA14_13300	-0.885587	5.21276	3.80845	0.0659566	0.181396
PA14_16970	-0.884389	5.76722	7.66347	0.0122706	0.0508933
PA14_14750	0.884338	7.64218	10.1166	0.00494146	0.0250198
PA14_36980	0.88418	7.41914	10.5535	0.00424366	0.0224459
PA14_19030	0.883966	6.05697	8.71878	0.00819708	0.0374688
PA14_15620	-0.883939	4.0455	0.999362	0.330078	0.541729
PA14_69300	-0.883254	6.21218	8.14919	0.0101662	0.0438635
PA14_03150	0.883254	5.58848	6.40827	0.0203832	0.0758481
PA14_59530	-0.882779	3.88666	0.761488	0.393802	0.601817
nuoG	0.882768	8.27234	16.991	0.00058415	0.00488579
PA14_42950	-0.882727	4.20787	1.19303	0.288431	0.496344
PA14_44420	-0.882684	7.96966	15.2083	0.00096951	0.00722434
lpxD	0.882646	8.38845	16.9256	0.00059483	0.00494913
PA14_12420	-0.88225	8.20182	17.3813	0.00052476	0.00447939
pslE	-0.882174	5.26575	3.43142	0.0796322	0.206542
PA14_24380	0.881966	4.87331	3.23079	0.088244	0.222924
PA14_06875	-0.881563	10.3574	4.66197	0.043889	0.136196
hrpA	0.881452	7.18469	18.2898	0.00041079	0.00371532
PA14_35340	0.881245	3.64123	0.660407	0.426523	0.631839
PA14_53900	0.881013	5.43456	5.41313	0.0312485	0.104586
PA14_62410	0.880164	6.03091	8.48412	0.00895132	0.0399907
PA14_19510	-0.880122	3.29514	0.516809	0.48099	0.682317
PA14_17000	-0.879871	3.34925	0.445857	0.512371	0.707358
gnyH	0.879811	6.7015	5.93557	0.0267899	0.0924307
PA14_59580	-0.879802	7.85557	26.8059	5.42e-05	0.00072873
PA14_52465	0.879255	3.75226	0.553629	0.465979	0.667951
moaC	-0.879197	5.56423	5.59812	0.0288093	0.0980055
PA14_47360	0.878664	5.73384	5.60275	0.028751	0.0978857
PA14_36080	-0.878001	3.1393	0.375214	0.547467	0.735851
PA14_31000	-0.877861	5.27953	4.50465	0.0472249	0.143012
merR	-0.876916	6.83681	10.3027	0.00462968	0.023995
PA14_69020	-0.87688	5.7901	8.76901	0.00804503	0.0369162
PA14_38370	-0.876648	4.41261	3.48604	0.082358	0.211785
PA14_40850	0.876602	7.28592	14.5604	0.00117403	0.00832343
hpcB	0.876438	5.10029	1.53756	0.230138	0.425777
PA14_59060	-0.876096	4.40718	1.13188	0.300762	0.510228
cycB	-0.875947	8.67705	28.8852	3.52e-05	0.00052314
PA14_70930	-0.875807	7.48403	15.6231	0.00085949	0.00658686
PA14_28730	-0.875741	9.20911	31.0629	2.28e-05	0.00038029
recR	0.875496	5.42256	3.15689	0.0916872	0.228986
PA14_55440	0.875319	4.47	1.22542	0.282174	0.4892
pgl	0.875227	4.99465	3.95502	0.0613898	0.171868
PA14_09910	-0.874714	6.23983	8.80422	0.00794035	0.0364924
gcvP2	0.874522	7.39091	13.7419	0.00150412	0.00998927
mscL	-0.874465	10.1524	24.7932	8.42e-05	0.00103098
PA14_25130	0.874401	7.32555	11.7796	0.00280664	0.0161285
rbsR	0.87436	6.85027	8.92275	0.00759897	0.0352163
pmtA	0.87422	6.03441	8.07171	0.0104729	0.0450229
gbt	0.873779	6.17078	14.8444	0.001079	0.00783049
PA14_04080	0.873525	6.01882	6.37722	0.0206494	0.0766461
PA14_43170	0.873093	5.90056	5.36759	0.0318845	0.105936
xcpW	0.873005	5.53924	7.71981	0.012003	0.0500328
gntR	-0.872721	6.17025	11.4851	0.00309412	0.0174678
PA14_28380	0.87262	4.81959	1.37222	0.255971	0.460343
PA14_02090	-0.871677	6.33641	9.40829	0.00636208	0.0307916
PA14_24110	-0.871645	3.92105	0.750743	0.397095	0.604728
PA14_27500	0.871638	7.04902	20.4026	0.00023813	0.00244067
PA14_30140	0.871064	5.02194	2.56258	0.125983	0.284638
PA14_49110	0.8708	4.66844	2.42661	0.135859	0.299613
PA14_40550	0.869196	5.23513	3.59744	0.0732401	0.195263
PA14_61530	-0.86855	4.9592	1.55437	0.227704	0.422727
PA14_11290	0.868185	5.02421	3.40015	0.0809074	0.209482
osmE	-0.86813	10.5724	14.3754	0.0012409	0.00862807
PA14_36820	0.867195	11.6843	2.13864	0.16004	0.336079
PA14_58600	-0.866641	5.25185	3.67688	0.0703938	0.19007
PA14_47060	0.86644	3.85491	0.752315	0.396611	0.604456
nuoI	0.865934	6.05379	8.85101	0.00840647	0.0381317
PA14_01660	-0.865728	5.9782	10.2445	0.00472481	0.0243601
PA14_49700	-0.865017	4.96216	2.49952	0.130452	0.291291
PA14_44390	0.86481	5.76936	8.53381	0.00878532	0.0394655
PA14_00320	0.864614	4.30836	1.70388	0.207431	0.396905
PA14_28840	-0.864049	8.66508	15.6405	0.0008552	0.00656241
PA14_46160	-0.864014	9.15041	14.4463	0.00121479	0.00848635
vanA	-0.863495	3.70823	0.893668	0.356401	0.566189
gnyA	0.862514	8.18995	3.57809	0.0739535	0.196458
PA14_51060	0.862437	5.0041	5.00549	0.0374992	0.120014
PA14_28780	-0.862301	5.55991	8.22322	0.00988253	0.0429839
PA14_66760	0.861972	6.07095	7.35427	0.0138636	0.056252
PA14_73060	-0.861758	3.97362	0.971088	0.336843	0.547354
PA14_15780	0.861681	4.95688	4.1302	0.0564024	0.162054
PA14_20240	-0.861523	3.85313	0.590401	0.451748	0.656886
PA14_33560	0.860819	4.71463	2.3019	0.145745	0.315568
pcaT	-0.860736	5.38903	5.80617	0.0263201	0.0913417
cobA	0.860325	6.93856	4.36822	0.0503544	0.149299
ribD	0.860271	5.85836	5.76931	0.0267427	0.0923217
PA14_27560	0.860069	5.17266	4.08051	0.057768	0.165146
PA14_40630	-0.85935	8.73472	35.1835	1.06e-05	0.00020717
PA14_22230	-0.859104	4.08915	2.09072	0.164556	0.342647
citA	0.858746	6.86754	6.95815	0.0162549	0.0634765
fdhA	-0.858595	4.60241	3.60577	0.0729355	0.194771
PA14_54890	-0.857934	6.56842	11.1794	0.00342783	0.018925
PA14_03760	-0.857855	4.17632	1.15417	0.296188	0.504454
PA14_52500	-0.857418	3.20392	0.3229	0.576552	0.758661
PA14_15580	-0.85739	9.02744	22.0979	0.00015721	0.00173109
PA14_48730	0.856885	5.49994	4.78479	0.0750862	0.198137
plsX	0.856402	7.23878	16.6293	0.00064593	0.00527111
folD	0.855008	6.06813	7.39571	0.0136371	0.0555233
mdoH	0.854957	8.76874	13.8908	0.0014371	0.00966332
PA14_37090	-0.854908	3.74954	0.953333	0.34119	0.550889
PA14_61150	0.854356	7.84333	14.0193	0.00138191	0.00939887
PA14_04940	0.853851	5.92562	4.59966	0.045177	0.138883
algF	0.853815	3.64775	0.44562	0.527826	0.721467
cca	-0.85354	5.94924	9.8183	0.00549135	0.0271867
PA14_64270	-0.853362	5.04175	4.68961	0.0433314	0.135103
PA14_21860	-0.852962	4.87626	4.54332	0.0463789	0.141477
[truncated: 3,925 more rows]

## Sheet: 4-CLC
				PA14 on CAF2				PA14 on CAF2				PA14 on CAF2				PA14 on CAF2				PA14 on CAF2				PA14 on adh1				PA14 on adh1				PA14 on adh1				PA14 on adh1				PA14 on adh1				Pa on YPD				Pa on YPD
Name	Chromosome	Region	Identifier	GD1_S1_R1_001 RNA-Seq un-mapped reads [GD1_S1_R1_001] (single) sampled (GE) - Total counts	GD1_S1_R1_001 RNA-Seq un-mapped reads [GD1_S1_R1_001] (single) sampled (GE) - RPKM	GD1_S1_R1_001 RNA-Seq un-mapped reads [GD1_S1_R1_001] (single) sampled (GE) - TPM	GD1_S1_R1_001 RNA-Seq un-mapped reads [GD1_S1_R1_001] (single) sampled (GE) - CPM	GD2_S2_R1_001 RNA-Seq un-mapped reads [GD2_S2_R1_001] (single) sampled (GE) - Total counts	GD2_S2_R1_001 RNA-Seq un-mapped reads [GD2_S2_R1_001] (single) sampled (GE) - RPKM	GD2_S2_R1_001 RNA-Seq un-mapped reads [GD2_S2_R1_001] (single) sampled (GE) - TPM	GD2_S2_R1_001 RNA-Seq un-mapped reads [GD2_S2_R1_001] (single) sampled (GE) - CPM	GD3_S3_R1_001 RNA-Seq un-mapped reads [GD3_S3_R1_001] (single) sampled (GE) - Total counts	GD3_S3_R1_001 RNA-Seq un-mapped reads [GD3_S3_R1_001] (single) sampled (GE) - RPKM	GD3_S3_R1_001 RNA-Seq un-mapped reads [GD3_S3_R1_001] (single) sampled (GE) - TPM	GD3_S3_R1_001 RNA-Seq un-mapped reads [GD3_S3_R1_001] (single) sampled (GE) - CPM	GD4_S4_R1_001 RNA-Seq un-mapped reads [GD4_S4_R1_001] (single) sampled (GE) - Total counts	GD4_S4_R1_001 RNA-Seq un-mapped reads [GD4_S4_R1_001] (single) sampled (GE) - RPKM	GD4_S4_R1_001 RNA-Seq un-mapped reads [GD4_S4_R1_001] (single) sampled (GE) - TPM	GD4_S4_R1_001 RNA-Seq un-mapped reads [GD4_S4_R1_001] (single) sampled (GE) - CPM	GD5_S5_R1_001 RNA-Seq un-mapped reads [GD5_S5_R1_001] (single) sampled (GE) - Total counts	GD5_S5_R1_001 RNA-Seq un-mapped reads [GD5_S5_R1_001] (single) sampled (GE) - RPKM	GD5_S5_R1_001 RNA-Seq un-mapped reads [GD5_S5_R1_001] (single) sampled (GE) - TPM	GD5_S5_R1_001 RNA-Seq un-mapped reads [GD5_S5_R1_001] (single) sampled (GE) - CPM	GD6_S6_R1_001 RNA-Seq un-mapped reads [GD6_S6_R1_001] (single) sampled (GE) - Total counts	GD6_S6_R1_001 RNA-Seq un-mapped reads [GD6_S6_R1_001] (single) sampled (GE) - RPKM	GD6_S6_R1_001 RNA-Seq un-mapped reads [GD6_S6_R1_001] (single) sampled (GE) - TPM	GD6_S6_R1_001 RNA-Seq un-mapped reads [GD6_S6_R1_001] (single) sampled (GE) - CPM	GD7_S7_R1_001 RNA-Seq un-mapped reads [GD7_S7_R1_001] (single) sampled (GE) - Total counts	GD7_S7_R1_001 RNA-Seq un-mapped reads [GD7_S7_R1_001] (single) sampled (GE) - RPKM	GD7_S7_R1_001 RNA-Seq un-mapped reads [GD7_S7_R1_001] (single) sampled (GE) - TPM	GD7_S7_R1_001 RNA-Seq un-mapped reads [GD7_S7_R1_001] (single) sampled (GE) - CPM	GD8_S8_R1_001 RNA-Seq un-mapped reads [GD8_S8_R1_001] (single) sampled (GE) - Total counts	GD8_S8_R1_001 RNA-Seq un-mapped reads [GD8_S8_R1_001] (single) sampled (GE) - RPKM	GD8_S8_R1_001 RNA-Seq un-mapped reads [GD8_S8_R1_001] (single) sampled (GE) - TPM	GD8_S8_R1_001 RNA-Seq un-mapped reads [GD8_S8_R1_001] (single) sampled (GE) - CPM	GD9_S9_R1_001 RNA-Seq un-mapped reads [GD9_S9_R1_001] (single) sampled (GE) - Total counts	GD9_S9_R1_001 RNA-Seq un-mapped reads [GD9_S9_R1_001] (single) sampled (GE) - RPKM	GD9_S9_R1_001 RNA-Seq un-mapped reads [GD9_S9_R1_001] (single) sampled (GE) - TPM	GD9_S9_R1_001 RNA-Seq un-mapped reads [GD9_S9_R1_001] (single) sampled (GE) - CPM	GD10_S10_R1_001 RNA-Seq un-mapped reads [GD10_S10_R1_001] (single) sampled (GE) - Total counts	GD10_S10_R1_001 RNA-Seq un-mapped reads [GD10_S10_R1_001] (single) sampled (GE) - RPKM	GD10_S10_R1_001 RNA-Seq un-mapped reads [GD10_S10_R1_001] (single) sampled (GE) - TPM	GD10_S10_R1_001 RNA-Seq un-mapped reads [GD10_S10_R1_001] (single) sampled (GE) - CPM	GD11_S11_R1_001 RNA-Seq un-mapped reads [GD11_S11_R1_001] (single) sampled (GE) - Total counts	GD11_S11_R1_001 RNA-Seq un-mapped reads [GD11_S11_R1_001] (single) sampled (GE) - RPKM	GD11_S11_R1_001 RNA-Seq un-mapped reads [GD11_S11_R1_001] (single) sampled (GE) - TPM	GD11_S11_R1_001 RNA-Seq un-mapped reads [GD11_S11_R1_001] (single) sampled (GE) - CPM	GD12_S12_R1_001 RNA-Seq un-mapped reads [GD12_S12_R1_001] (single) sampled (GE) - Total counts	GD12_S12_R1_001 RNA-Seq un-mapped reads [GD12_S12_R1_001] (single) sampled (GE) - RPKM
dnaA	PA14 ref	483..2027	https://www.ncbi.nlm.nih.gov/entrez/query.fcgi?db=gene&cmd=Retrieve&dopt=full_report&list_uids=4384099	100	198.596	228.98	447.555	107	204.019	232.904	461.014	139	219.294	243.43	482.342	107	173.318	190.491	390.509	115	185.048	205.653	419.117	183	258.165	279.515	614.526	178	244.876	265.959	514.525	129	175.04	192.225	401.931	147	199.938	218.771	460.898	168	233.974	255.712	530.628	146	196.352	218.905	497.906	70	96.0259
dnaN	PA14 ref	2056..3159	https://www.ncbi.nlm.nih.gov/entrez/query.fcgi?db=gene&cmd=Retrieve&dopt=full_report&list_uids=4384100	69	191.769	221.109	308.813	82	218.806	249.785	353.3	102	225.201	249.988	353.949	82	185.88	204.298	299.268	95	213.929	237.75	346.227	93	183.607	198.791	312.3	131	252.207	273.921	378.667	104	197.488	216.877	324.038	113	215.088	235.348	354.296	123	239.73	262.003	388.495	94	176.917	197.238	320.57	63	120.946
recF	PA14 ref	3169..4278	https://www.ncbi.nlm.nih.gov/entrez/query.fcgi?db=gene&cmd=Retrieve&dopt=full_report&list_uids=4384101	46	127.155	146.609	205.875	30	79.6184	90.8908	129.256	57	125.168	138.944	197.795	47	105.965	116.464	171.532	53	118.705	131.922	193.158	70	137.452	148.819	235.065	86	164.676	178.854	248.591	68	128.429	141.038	211.871	79	149.558	163.646	247.693	80	155.079	169.488	252.68	79	147.882	164.867	269.415	56	106.926
gyrB	PA14 ref	4275..6695	https://www.ncbi.nlm.nih.gov/entrez/query.fcgi?db=gene&cmd=Retrieve&dopt=full_report&list_uids=4384102	142	179.967	207.501	635.528	125	152.1	173.635	538.568	166	167.129	185.524	576.034	148	152.987	168.146	540.143	145	148.898	165.478	528.452	238	214.268	231.988	799.22	273	239.675	260.31	789.131	199	172.32	189.238	620.034	191	165.785	181.401	598.853	231	205.307	224.382	729.613	236	202.548	225.812	804.834	107	93.6716
PA14_00060	PA14 ref	complement(7018..7791)	https://www.ncbi.nlm.nih.gov/entrez/query.fcgi?db=gene&cmd=Retrieve&dopt=full_report&list_uids=4385186	37	146.676	169.117	165.595	10	38.0605	43.4491	43.0854	14	44.0887	48.9412	48.5812	32	103.466	113.718	116.788	35	112.42	124.938	127.557	29	81.6642	88.4178	97.384	34	93.3667	101.405	98.28	28	75.8393	83.285	87.2409	37	100.454	109.916	116.008	42	116.76	127.608	132.657	30	80.5361	89.7865	102.309	33	90.3633
PA14_00070	PA14 ref	complement(7803..8339)	https://www.ncbi.nlm.nih.gov/entrez/query.fcgi?db=gene&cmd=Retrieve&dopt=full_report&list_uids=4385187	12	68.5654	79.0556	53.7066	11	60.3439	68.8875	47.394	10	45.3906	50.3864	34.7009	3	13.9809	15.3662	10.9488	12	55.555	61.7409	43.7339	9	36.5294	39.5504	30.2226	20	79.1608	85.9762	57.8118	11	42.9433	47.1594	34.2732	11	43.0452	47.0999	34.4889	12	48.0833	52.5506	37.902	10	38.6933	43.1376	34.1032	12	47.3616
PA14_00080	PA14 ref	8671..10377	https://www.ncbi.nlm.nih.gov/entrez/query.fcgi?db=gene&cmd=Retrieve&dopt=full_report&list_uids=4385188	42	75.4943	87.0445	187.973	43	74.2079	84.7143	185.267	54	77.1081	85.5949	187.385	39	57.1766	62.8419	142.335	60	87.3843	97.1144	218.67	70	89.3798	96.7714	235.065	74	92.1409	100.074	213.904	85	104.391	114.64	264.838	60	73.8625	80.8201	188.122	71	89.4977	97.8128	224.253	85	103.466	115.35	289.877	52	64.5638
glyS	PA14 ref	complement(10434..12488)	https://www.ncbi.nlm.nih.gov/entrez/query.fcgi?db=gene&cmd=Retrieve&dopt=full_report&list_uids=4385189	18	26.8757	30.9875	80.5599	27	38.705	44.1849	116.331	40	47.4447	52.6667	138.803	22	26.7916	29.4462	80.2915	36	43.5518	48.4013	131.202	31	32.8795	35.5986	104.1	62	64.126	69.647	179.216	28	28.5643	31.3686	87.2409	55	56.2415	61.5393	172.445	60	62.8241	68.661	189.51	21	21.2333	23.6722	71.6166	10	10.3135
glyQ	PA14 ref	complement(12488..13435)	https://www.ncbi.nlm.nih.gov/entrez/query.fcgi?db=gene&cmd=Retrieve&dopt=full_report&list_uids=4385190	12	38.8393	44.7815	53.7066	13	40.3971	46.1165	56.011	22	56.5658	62.7917	76.3419	20	52.797	58.0283	72.9923	22	57.6939	64.118	80.1789	21	48.282	52.2749	70.5194	22	49.3252	53.5719	63.5929	26	57.4966	63.1415	81.0094	22	48.7664	53.36	68.9779	27	61.2834	66.9771	85.2794	14	30.6853	34.2098	47.7444	11	24.5925
tag	PA14 ref	13540..14091	https://www.ncbi.nlm.nih.gov/entrez/query.fcgi?db=gene&cmd=Retrieve&dopt=full_report&list_uids=4385191	6	33.3511	38.4537	26.8533	9	48.0307	54.8309	38.7769	8	35.3257	39.2138	27.7607	10	45.3366	49.8287	36.4961	14	63.0529	70.0737	51.0229	15	59.228	64.1261	50.371	20	77.0096	83.6399	57.8118	12	45.5742	50.0486	37.389	13	49.4892	54.1509	40.7597	10	38.9806	42.6022	31.585	14	52.6986	58.7516	47.7444	4	15.3582
PA14_00120	PA14 ref	14236..15123	https://www.ncbi.nlm.nih.gov/entrez/query.fcgi?db=gene&cmd=Retrieve&dopt=full_report&list_uids=4385192	34	117.48	135.454	152.169	18	59.7138	68.1681	77.5537	31	85.092	94.4575	107.573	21	59.1826	65.0466	76.6419	29	81.1897	90.23	105.69	56	137.452	148.819	188.052	47	112.497	122.182	135.858	41	96.7939	106.297	127.746	35	82.825	90.6268	109.738	42	101.771	111.226	132.657	52	121.675	135.65	177.336	41	97.8566
PA14_00130	PA14 ref	15208..15474	https://www.ncbi.nlm.nih.gov/entrez/query.fcgi?db=gene&cmd=Retrieve&dopt=full_report&list_uids=4385193	13	149.393	172.249	58.1821	7	77.2328	88.1675	30.1598	2	18.2582	20.2678	6.94017	8	74.9836	82.4133	29.1969	2	18.6224	20.6959	7.28899	11	89.7958	97.2219	36.9387	12	95.5266	103.751	34.6871	15	117.776	129.339	46.7362	17	133.796	146.399	53.3011	3	24.1767	26.4229	9.47549	28	217.9	242.928	95.4888	20	158.759
PA14_00140	PA14 ref	15621..16274	https://www.ncbi.nlm.nih.gov/entrez/query.fcgi?db=gene&cmd=Retrieve&dopt=full_report&list_uids=4385194	5	23.458	27.0469	22.3777	9	40.5396	46.2793	38.7769	3	11.1811	12.4117	10.4103	9	34.4391	37.8515	32.8465	6	22.8081	25.3478	21.867	11	36.6598	39.6915	36.9387	16	51.9992	56.4761	46.2494	6	19.2332	21.1214	18.6945	11	35.3444	38.6738	34.4889	13	42.7713	46.7451	41.0605	13	41.3025	46.0465	44.3341	13	42.1293
PA14_00150	PA14 ref	complement(16336..16608)	https://www.ncbi.nlm.nih.gov/entrez/query.fcgi?db=gene&cmd=Retrieve&dopt=full_report&list_uids=4385195	5	56.196	64.7937	22.3777	1	10.7908	12.3185	4.30854	4	35.7139	39.6447	13.8803	0	0	0	0	3	27.3196	30.3616	10.9335	2	15.9677	17.2882	6.71614	3	23.3568	25.3677	8.67176	7	53.7542	59.0317	21.8102	3	23.0922	25.2674	9.40608	2	15.7636	17.2281	6.317	6	45.6666	50.9119	20.4619	6	46.5809
PA14_00160	PA14 ref	complement(16923..17240)	https://www.ncbi.nlm.nih.gov/entrez/query.fcgi?db=gene&cmd=Retrieve&dopt=full_report&list_uids=4385196	5	48.2438	55.6248	22.3777	3	27.7913	31.726	12.9256	12	91.9801	102.104	41.641	7	55.0882	60.5465	25.5473	10	78.1787	86.8838	36.4449	7	47.9784	51.9462	23.5065	10	66.8386	72.5931	28.9059	11	72.5175	79.637	34.2732	12	79.2977	86.7672	37.6243	17	115.029	125.717	53.6945	8	52.2725	58.2765	27.2825	10	66.6487
trkA	PA14 ref	complement(17389..18762)	https://www.ncbi.nlm.nih.gov/entrez/query.fcgi?db=gene&cmd=Retrieve&dopt=full_report&list_uids=4385197	22	49.1286	56.645	98.4621	27	57.8885	66.0844	116.331	32	56.7679	63.016	111.043	24	43.7131	48.0444	87.5907	31	56.0907	62.3363	112.979	56	88.8333	96.1798	188.052	56	86.6274	94.0858	161.873	41	62.5568	68.6984	127.746	42	64.2346	70.2852	131.685	43	67.3393	73.5957	135.815	51	77.1247	85.9833	173.926	28	43.1907
PA14_00180	PA14 ref	complement(18789..20093)	https://www.ncbi.nlm.nih.gov/entrez/query.fcgi?db=gene&cmd=Retrieve&dopt=full_report&list_uids=4385198	13	30.5655	35.2418	58.1821	10	22.5738	25.7698	43.0854	10	18.678	20.7337	34.7009	7	13.4238	14.7539	25.5473	6	11.4303	12.703	21.867	22	36.744	39.7827	73.8775	28	45.6039	49.5302	80.9365	7	11.2451	12.3492	21.8102	15	24.1539	26.4291	47.0304	9	14.8395	16.2182	28.4265	12	19.1065	21.3011	40.9238	11	17.8649
fmt	PA14 ref	complement(20090..21034)	https://www.ncbi.nlm.nih.gov/entrez/query.fcgi?db=gene&cmd=Retrieve&dopt=full_report&list_uids=4385199	12	38.9626	44.9237	53.7066	7	21.8213	24.9108	30.1598	10	25.7934	28.6323	34.7009	5	13.2412	14.5531	18.2481	4	10.5231	11.6948	14.578	13	29.9838	32.4634	43.6549	22	49.4818	53.742	63.5929	16	35.4948	38.9796	49.8519	10	22.2369	24.3315	31.3536	10	22.7696	24.8851	31.585	15	32.9815	36.7697	51.1547	6	13.4567
def	PA14 ref	complement(21088..21594)	https://www.ncbi.nlm.nih.gov/entrez/query.fcgi?db=gene&cmd=Retrieve&dopt=full_report&list_uids=4385200	36	217.868	251.2	161.12	39	226.606	258.689	168.033	49	235.574	261.502	170.034	54	266.547	292.957	197.079	44	215.755	239.779	160.358	74	318.125	344.434	248.497	71	297.649	323.276	205.232	76	314.255	345.108	236.797	57	236.251	258.505	178.715	54	229.178	250.47	170.559	143	586.055	653.369	487.675	90	376.23
PA14_00210	PA14 ref	21733..22758	https://www.ncbi.nlm.nih.gov/entrez/query.fcgi?db=gene&cmd=Retrieve&dopt=full_report&list_uids=4385201	29	86.7259	99.9945	129.791	29	83.2656	95.0544	124.948	28	66.5197	73.8411	97.1624	42	102.445	112.595	153.284	27	65.4233	72.708	98.4014	33	70.1038	75.9013	110.816	41	84.9358	92.2485	118.514	49	100.121	109.951	152.672	43	88.0699	96.3657	134.82	51	106.957	116.894	161.083	54	109.36	121.921	184.157	36	74.366
PA14_00230	PA14 ref	22893..23981	https://www.ncbi.nlm.nih.gov/entrez/query.fcgi?db=gene&cmd=Retrieve&dopt=full_report&list_uids=4385202	0	0	0	0	1	2.70513	3.08812	4.30854	1	2.23827	2.48462	3.47009	1	2.29805	2.52575	3.64961	2	4.56581	5.07421	7.28899	0	0	0	0	2	3.90352	4.2396	5.78118	0	0	0	0	3	5.78895	6.33425	9.40608	0	0	0	0	3	5.72405	6.38152	10.2309	3	5.83865
PA14_00240	PA14 ref	24022..24579	https://www.ncbi.nlm.nih.gov/entrez/query.fcgi?db=gene&cmd=Retrieve&dopt=full_report&list_uids=4385203	6	32.9925	38.0402	26.8533	13	68.6316	78.3485	56.011	20	87.3646	96.9803	69.4017	19	85.2132	93.6565	69.3427	31	138.116	153.495	112.979	18	70.3093	76.1239	60.4452	18	68.5634	74.4665	52.0306	20	75.1403	82.5174	62.3149	20	75.3186	82.4133	62.7072	26	100.26	109.575	82.1209	8	29.7897	33.2113	27.2825	10	37.9826
qor	PA14 ref	complement(24589..25566)	https://www.ncbi.nlm.nih.gov/entrez/query.fcgi?db=gene&cmd=Retrieve&dopt=full_report&list_uids=4385204	14	43.9225	50.6425	62.6577	15	45.1822	51.5791	64.6281	27	67.2922	74.6986	93.6923	28	71.6484	78.7476	102.189	26	66.0922	73.4515	94.7569	12	26.7434	28.9551	40.2968	12	26.0793	28.3247	34.6871	15	32.1536	35.3103	46.7362	16	34.3785	37.6169	50.1657	17	37.4022	40.8772	53.6945	14	29.744	33.1604	47.7444	4	8.66842
hemF	PA14 ref	25757..26674	https://www.ncbi.nlm.nih.gov/entrez/query.fcgi?db=gene&cmd=Retrieve&dopt=full_report&list_uids=4384742	16	53.4781	61.6599	71.6088	17	54.5534	62.277	73.2452	21	55.7592	61.8962	72.8718	17	46.344	50.936	62.0434	14	37.9141	42.1358	51.0229	22	52.2342	56.5539	73.8775	23	53.2524	57.8373	66.4835	24	54.8082	60.1891	74.7779	30	68.6728	75.1416	94.0608	29	67.9739	74.2893	91.5964	28	63.3761	70.6555	95.4888	14	32.3225
aroE	PA14 ref	26732..27556	https://www.ncbi.nlm.nih.gov/entrez/query.fcgi?db=gene&cmd=Retrieve&dopt=full_report&list_uids=4384743	4	14.8766	17.1527	17.9022	11	39.2784	44.8395	47.394	10	29.5451	32.797	34.7009	4	12.1337	13.336	14.5985	11	33.1478	36.8387	40.0894	7	18.4935	20.0229	23.5065	17	43.7975	47.5683	49.14	12	30.4933	33.4871	37.389	10	25.4714	27.8707	31.3536	10	26.0815	28.5047	31.585	11	27.7044	30.8866	37.5135	2	5.13801
plcB	PA14 ref	27667..28653	https://www.ncbi.nlm.nih.gov/entrez/query.fcgi?db=gene&cmd=Retrieve&dopt=full_report&list_uids=4384744	41	127.457	146.958	183.498	59	176.096	201.028	254.204	85	209.914	233.018	294.957	68	172.417	189.5	248.174	76	191.431	212.746	276.982	49	108.207	117.155	164.545	60	129.208	140.332	173.435	49	104.077	114.295	152.672	80	170.325	186.369	250.829	75	163.505	178.696	236.887	41	86.3132	96.2271	139.823	37	79.4518
PA14_00310	PA14 ref	28634..29920	https://www.ncbi.nlm.nih.gov/entrez/query.fcgi?db=gene&cmd=Retrieve&dopt=full_report&list_uids=4384745	36	85.8267	98.9577	161.12	51	116.737	133.264	219.736	75	142.044	157.678	260.256	48	93.3362	102.584	175.181	42	81.131	90.1647	153.069	31	52.4998	56.8415	104.1	33	54.4991	59.1913	95.3894	29	47.2385	51.8763	90.3566	42	68.5768	75.0365	131.685	21	35.1098	38.3717	66.3284	16	25.8316	28.7987	54.565	13	21.4084
PA14_00320	PA14 ref	29917..30519	https://www.ncbi.nlm.nih.gov/entrez/query.fcgi?db=gene&cmd=Retrieve&dopt=full_report&list_uids=4384746	1	5.0884	5.8669	4.47555	2	9.77075	11.1541	8.61708	2	8.08449	8.97429	6.94017	7	29.0515	31.93	25.5473	7	28.86	32.0735	25.5115	5	18.0729	19.5675	16.7903	8	28.1986	30.6264	23.1247	3	10.4299	11.4539	9.34724	3	10.4547	11.4395	9.40608	4	14.2735	15.5996	12.634	2	6.89165	7.68322	6.82063	1	3.51481
PA14_00340	PA14 ref	complement(30523..32076)	https://www.ncbi.nlm.nih.gov/entrez/query.fcgi?db=gene&cmd=Retrieve&dopt=full_report&list_uids=4384747	2	3.94891	4.55307	8.9511	1	1.89568	2.16407	4.30854	2	3.13703	3.4823	6.94017	1	1.61041	1.76998	3.64961	9	14.3982	16.0014	32.8005	4	5.61027	6.07423	13.4323	4	5.47096	5.94199	11.5624	3	4.04713	4.44447	9.34724	7	9.46571	10.3573	21.9475	1	1.38464	1.51328	3.1585	5	6.68543	7.45332	17.0516	6	8.18313
PA14_00360	PA14 ref	complement(32081..33004)	https://www.ncbi.nlm.nih.gov/entrez/query.fcgi?db=gene&cmd=Retrieve&dopt=full_report&list_uids=4384748	1	3.32067	3.82872	4.47555	2	6.37637	7.27913	8.61708	2	5.27592	5.8566	6.94017	2	5.41683	5.95356	7.29923	1	2.69057	2.99016	3.64449	1	2.35886	2.55394	3.35807	2	4.60058	4.99667	5.78118	3	6.80654	7.47479	9.34724	0	0	0	0	0	0	0	0	3	6.74621	7.52108	10.2309	0	0
betC	PA14 ref	complement(33021..34532)	https://www.ncbi.nlm.nih.gov/entrez/query.fcgi?db=gene&cmd=Retrieve&dopt=full_report&list_uids=4384749	3	6.0879	7.01932	13.4266	2	3.89667	4.44836	8.61708	4	6.44834	7.15807	13.8803	3	4.96543	5.45743	10.9488	4	6.57694	7.30927	14.578	4	5.76611	6.24296	13.4323	3	4.21719	4.58028	8.67176	3	4.15955	4.56793	9.34724	5	6.94903	7.60361	15.6768	5	7.1155	7.77659	15.7925	5	6.87114	7.66036	17.0516	2	2.80348
PA14_00400	PA14 ref	34645..35559	https://www.ncbi.nlm.nih.gov/entrez/query.fcgi?db=gene&cmd=Retrieve&dopt=full_report&list_uids=4384750	4	13.4133	15.4655	17.9022	8	25.7563	29.4029	34.4683	9	23.9751	26.6139	31.2308	7	19.1454	21.0424	25.5473	3	8.1511	9.0587	10.9335	3	7.14619	7.73718	10.0742	7	16.2604	17.6604	20.2341	1	2.29116	2.5161	3.11575	2	4.5932	5.02586	6.27072	4	9.40646	10.2804	12.634	4	9.08342	10.1267	13.6413	1	2.31632
PA14_00410	PA14 ref	35570..35947	https://www.ncbi.nlm.nih.gov/entrez/query.fcgi?db=gene&cmd=Retrieve&dopt=full_report&list_uids=4384751	7	56.8204	65.5137	31.3288	4	31.1733	35.5869	17.2342	4	25.7934	28.6323	13.8803	5	33.1029	36.3828	18.2481	5	32.8847	36.5464	18.2225	6	34.5967	37.4578	20.1484	5	28.1146	30.5352	14.4529	7	38.8225	42.634	21.8102	6	33.3554	36.4973	18.8122	8	45.5392	49.7701	25.268	3	16.4907	18.3849	10.2309	5	28.0348
PA14_00420	PA14 ref	complement(35926..36291)	https://www.ncbi.nlm.nih.gov/entrez/query.fcgi?db=gene&cmd=Retrieve&dopt=full_report&list_uids=4384752	1	8.38334	9.66595	4.47555	3	24.1466	27.5652	12.9256	4	26.639	29.571	13.8803	1	6.83764	7.51514	3.64961	0	0	0	0	5	29.7758	32.2383	16.7903	2	11.6146	12.6145	5.78118	1	5.72791	6.29026	3.11575	0	0	0	0	1	5.87904	6.42524	3.1585	0	0	0	0	1	5.79079
PA14_00430	PA14 ref	complement(36299..36922)	https://www.ncbi.nlm.nih.gov/entrez/query.fcgi?db=gene&cmd=Retrieve&dopt=full_report&list_uids=4384753	2	9.83431	11.3389	8.9511	0	0	0	0	0	0	0	0	4	16.0422	17.6317	14.5985	0	0	0	0	4	13.9717	15.1272	13.4323	3	10.2186	11.0984	8.67176	2	6.71928	7.37896	6.23149	3	10.1028	11.0545	9.40608	4	13.7931	15.0746	12.634	4	13.3194	14.8493	13.6413	1	3.39652
trpA	PA14 ref	complement(37108..37914)	https://www.ncbi.nlm.nih.gov/entrez/query.fcgi?db=gene&cmd=Retrieve&dopt=full_report&list_uids=4384754	6	22.8127	26.3029	26.8533	15	54.7562	62.5086	64.6281	12	36.2449	40.2342	41.641	20	62.0218	68.1671	72.9923	13	40.0484	44.5078	47.3784	10	27.0085	29.2421	33.5807	4	10.5351	11.4422	11.5624	8	20.7823	22.8226	24.926	4	10.4158	11.3969	12.5414	11	29.3296	32.0546	34.7435	7	18.0233	20.0935	23.8722	7	18.3842
trpB	PA14 ref	complement(37911..39119)	https://www.ncbi.nlm.nih.gov/entrez/query.fcgi?db=gene&cmd=Retrieve&dopt=full_report&list_uids=4384755	17	43.1441	49.7449	76.0843	29	70.6622	80.6665	124.948	89	179.433	199.183	308.838	64	132.477	145.604	233.575	45	92.5341	102.838	164.002	76	137.013	148.344	255.213	60	105.482	114.564	173.435	60	104.04	114.255	186.945	48	83.4298	91.2886	150.497	62	110.345	120.597	195.827	47	80.7759	90.0538	160.285	74	129.725
trpI	PA14 ref	39223..40110	https://www.ncbi.nlm.nih.gov/entrez/query.fcgi?db=gene&cmd=Retrieve&dopt=full_report&list_uids=4384756	1	3.4553	3.98394	4.47555	4	13.2697	15.1485	17.2342	1	2.7449	3.04702	3.47009	3	8.45465	9.29237	10.9488	1	2.79964	3.11138	3.64449	3	7.36348	7.97243	10.0742	4	9.57417	10.3985	11.5624	7	16.5258	18.1482	21.8102	4	9.46571	10.3573	12.5414	3	7.26935	7.94473	9.47549	1	2.3399	2.60866	3.41032	1	2.38675
PA14_00470	PA14 ref	40211..40426	https://www.ncbi.nlm.nih.gov/entrez/query.fcgi?db=gene&cmd=Retrieve&dopt=full_report&list_uids=4384757	112	1590.97	1834.38	501.262	103	1404.75	1603.63	443.78	79	891.483	989.603	274.137	104	1204.94	1324.34	379.56	95	1093.42	1215.17	346.227	156	1574.15	1704.33	523.859	120	1180.81	1282.48	346.871	129	1252.03	1374.95	401.931	109	1060.42	1160.31	341.754	98	976.246	1066.95	309.533	247	2376.04	2648.95	842.348	256	2511.92
PA14_00480	PA14 ref	40610..40837	https://www.ncbi.nlm.nih.gov/entrez/query.fcgi?db=gene&cmd=Retrieve&dopt=full_report&list_uids=4384758	494	6647.99	7665.1	2210.92	679	8773.04	10015.1	2925.5	681	7280.35	8081.65	2363.13	666	7310.16	8034.48	2430.64	624	6804.02	7561.63	2274.16	779	7446.93	8062.79	2615.93	704	6562.84	7127.88	2034.97	944	8679.89	9532.06	2941.26	720	6635.96	7261.05	2257.46	620	5851.19	6394.81	1958.27	746	6798.52	7579.4	2544.1	858	7975.75
PA14_00490	PA14 ref	41133..42821	https://www.ncbi.nlm.nih.gov/entrez/query.fcgi?db=gene&cmd=Retrieve&dopt=full_report&list_uids=4384759	6	10.8998	12.5675	26.8533	2	3.48831	3.98219	8.61708	5	7.21573	8.00992	17.3504	2	2.96338	3.25701	7.29923	9	13.2473	14.7224	32.8005	6	7.74277	8.38309	20.1484	3	3.77525	4.10029	8.67176	6	7.4473	8.17845	18.6945	8	9.95329	10.8909	25.0829	9	11.4657	12.5309	28.4265	6	7.38128	8.2291	20.4619	0	0
PA14_00510	PA14 ref	42934..53265	https://www.ncbi.nlm.nih.gov/entrez/query.fcgi?db=gene&cmd=Retrieve&dopt=full_report&list_uids=4384760	20	5.93942	6.84812	89.511	17	4.84708	5.53333	73.2452	27	6.3697	7.07077	93.6923	31	7.5087	8.25269	113.138	22	5.29364	5.88307	80.1789	33	6.96152	7.53724	110.816	26	5.34864	5.80914	75.1553	29	5.88424	6.46194	90.3566	24	4.88127	5.34107	75.2486	20	4.16517	4.55215	63.17	48	9.65311	10.7619	163.695	43	8.8207
PA14_00520	PA14 ref	54577..54699	https://www.ncbi.nlm.nih.gov/entrez/query.fcgi?db=gene&cmd=Retrieve&dopt=full_report&list_uids=4384761	5	124.728	143.81	22.3777	0	0	0	0	1	19.8169	21.998	3.47009	2	40.6923	44.7243	7.29923	1	20.2121	22.4626	3.64449	1	17.7202	19.1857	3.35807	3	51.8406	56.3039	8.67176	5	85.2201	93.5868	15.5787	1	17.0845	18.6938	3.13536	2	34.9874	38.238	6.317	9	152.036	169.499	30.6928	8	137.849
PA14_00530	PA14 ref	54909..55304	https://www.ncbi.nlm.nih.gov/entrez/query.fcgi?db=gene&cmd=Retrieve&dopt=full_report&list_uids=4381736	6	46.4894	53.6021	26.8533	3	22.3173	25.477	12.9256	1	6.15523	6.8327	3.47009	4	25.2786	27.7833	14.5985	11	69.0579	76.7474	40.0894	9	49.5361	53.6327	30.2226	13	69.7754	75.7828	37.5776	7	37.0578	40.6961	21.8102	5	26.5327	29.032	15.6768	14	76.0712	83.1388	44.219	13	68.2116	76.0464	44.3341	12	64.2251
PA14_00550	PA14 ref	complement(55575..56984)	https://www.ncbi.nlm.nih.gov/entrez/query.fcgi?db=gene&cmd=Retrieve&dopt=full_report&list_uids=4381737	6	13.0566	15.0542	26.8533	3	6.26783	7.15523	12.9256	7	12.1009	13.4328	24.2906	6	10.6493	11.7044	21.8977	6	10.5791	11.757	21.867	2	3.09162	3.34729	6.71614	6	9.04454	9.82324	17.3435	5	7.43409	8.16395	15.5787	1	1.49035	1.63073	3.13536	1	1.52605	1.66783	3.1585	6	8.84184	9.85741	20.4619	8	12.0251
exoT	PA14 ref	57148..58476	https://www.ncbi.nlm.nih.gov/entrez/query.fcgi?db=gene&cmd=Retrieve&dopt=full_report&list_uids=4381738	9	20.7786	23.9576	40.2799	12	26.5994	30.3653	51.7025	8	14.6725	16.2874	27.7607	9	16.9475	18.6267	32.8465	13	24.3184	27.0262	47.3784	12	19.6803	21.3078	40.2968	8	12.7944	13.8959	23.1247	8	12.6195	13.8584	24.926	9	14.2306	15.5711	28.2182	11	17.8096	19.4643	34.7435	23	35.9595	40.0898	78.4373	19	30.3004
PA14_00570	PA14 ref	59018..59704	https://www.ncbi.nlm.nih.gov/entrez/query.fcgi?db=gene&cmd=Retrieve&dopt=full_report&list_uids=4381739	0	0	0	0	1	4.28804	4.89514	4.30854	6	21.288	23.631	20.8205	3	10.9283	12.0111	10.9488	1	3.61875	4.0217	3.64449	3	9.51786	10.305	10.0742	5	15.4692	16.801	14.4529	10	30.5155	33.5114	31.1575	3	9.17637	10.0407	9.40608	2	6.26412	6.84611	6.317	8	24.196	26.9752	27.2825	3	9.25515
PA14_00580	PA14 ref	59735..60088	https://www.ncbi.nlm.nih.gov/entrez/query.fcgi?db=gene&cmd=Retrieve&dopt=full_report&list_uids=4381740	0	0	0	0	2	16.6434	18.9998	8.61708	1	6.88552	7.64336	3.47009	1	7.06943	7.7699	3.64961	0	0	0	0	3	18.4711	19.9986	10.0742	0	0	0	0	1	5.92207	6.50349	3.11575	5	29.6806	32.4764	15.6768	1	6.07832	6.64305	3.1585	1	5.86958	6.54376	3.41032	0	0
PA14_00590	PA14 ref	60241..60750	https://www.ncbi.nlm.nih.gov/entrez/query.fcgi?db=gene&cmd=Retrieve&dopt=full_report&list_uids=4381741	8	48.1303	55.4939	35.8044	17	98.196	112.099	73.2452	18	86.0284	95.497	62.4615	15	73.6052	80.8983	54.7442	15	73.1201	81.2619	54.6674	10	42.737	46.2714	33.5807	14	58.3461	63.3695	40.4682	6	24.6637	27.0851	18.6945	5	20.6018	22.5425	15.6768	10	42.1907	46.1106	31.585	4	16.2967	18.1686	13.6413	1	4.15574
PA14_00600	PA14 ref	complement(60765..61148)	https://www.ncbi.nlm.nih.gov/entrez/query.fcgi?db=gene&cmd=Retrieve&dopt=full_report&list_uids=4381742	11	87.8941	101.341	49.231	19	145.76	166.396	81.8623	40	253.903	281.849	138.803	27	175.962	193.398	98.5396	25	161.854	179.877	91.1124	7	39.7321	43.0179	23.5065	10	55.3507	60.1162	28.9059	6	32.7565	35.9724	18.6945	8	43.7789	47.9027	25.0829	15	84.0518	91.8609	47.3775	0	0	0	0	1	5.51935
PA14_00620	PA14 ref	complement(61430..63091)	https://www.ncbi.nlm.nih.gov/entrez/query.fcgi?db=gene&cmd=Retrieve&dopt=full_report&list_uids=4381743	78	144	166.031	349.093	152	269.419	307.563	654.898	248	363.714	403.746	860.581	203	305.67	335.957	740.872	226	338.06	375.702	823.656	43	56.3913	61.0548	144.397	65	83.1259	90.2828	187.888	56	70.6373	77.5723	174.482	64	80.9199	88.5422	200.663	52	67.3224	73.5772	164.242	8	10.0016	11.1504	27.2825	4	5.10091
PA14_00630	PA14 ref	63701..63841	https://www.ncbi.nlm.nih.gov/entrez/query.fcgi?db=gene&cmd=Retrieve&dopt=full_report&list_uids=4381744	12	261.132	301.084	53.7066	8	167.142	190.806	34.4683	17	293.88	326.225	58.9915	15	266.232	292.611	54.7442	14	246.845	274.331	51.0229	22	340.078	368.202	73.8775	27	407.004	442.046	78.0459	16	237.891	261.246	49.8519	30	447.104	489.219	94.0608	16	244.168	266.853	50.536	27	397.883	443.583	92.0785	26	390.817
phzH	PA14 ref	64665..66497	https://www.ncbi.nlm.nih.gov/entrez/query.fcgi?db=gene&cmd=Retrieve&dopt=full_report&list_uids=4381745	21	35.1524	40.5305	93.9865	42	67.4997	77.0564	180.959	66	87.765	97.4247	229.026	65	88.7439	97.537	237.225	89	120.71	134.151	324.36	21	24.9707	27.0358	70.5194	47	54.4991	59.1913	135.858	23	26.3053	28.8878	71.6622	47	53.8817	58.9572	147.362	35	41.0859	44.9031	110.547	68	77.0827	85.9364	231.901	58	67.0632
PA14_00650	PA14 ref	complement(66550..66978)	https://www.ncbi.nlm.nih.gov/entrez/query.fcgi?db=gene&cmd=Retrieve&dopt=full_report&list_uids=4381746	21	150.197	173.176	93.9865	23	157.938	180.299	99.0964	40	227.27	252.284	138.803	45	262.508	288.518	164.233	28	162.262	180.329	102.046	16	81.29	88.0127	53.7291	18	89.1804	96.8585	52.0306	28	136.829	150.262	87.2409	32	156.747	171.512	100.331	25	125.392	137.042	78.9624	33	159.833	178.192	112.54	31	153.152
PA14_00660	PA14 ref	complement(67187..67735)	https://www.ncbi.nlm.nih.gov/entrez/query.fcgi?db=gene&cmd=Retrieve&dopt=full_report&list_uids=4381747	8	44.7112	51.5517	35.8044	6	32.1954	36.7537	25.8512	6	26.639	29.571	20.8205	11	50.1427	55.1111	40.1458	14	63.3974	70.4566	51.0229	6	23.8206	25.7906	20.1484	7	27.1007	29.4339	20.2341	6	22.9116	25.161	18.6945	8	30.6213	33.5057	25.0829	12	47.0323	51.402	37.902	2	7.56951	8.43895	6.82063	1	3.86053
PA14_00670	PA14 ref	complement(67774..68280)	https://www.ncbi.nlm.nih.gov/entrez/query.fcgi?db=gene&cmd=Retrieve&dopt=full_report&list_uids=4381748	12	72.6226	83.7334	53.7066	20	116.208	132.661	86.1708	24	115.383	128.083	83.282	28	138.209	151.904	102.189	17	83.3598	92.6418	61.9564	13	55.8869	60.5087	43.6549	18	75.4603	81.9572	52.0306	24	99.2385	108.982	74.7779	20	82.895	90.7034	62.7072	15	63.6606	69.5751	47.3775	16	65.5726	73.1043	54.565	14	58.5247
PA14_00680	PA14 ref	complement(68346..69266)	https://www.ncbi.nlm.nih.gov/entrez/query.fcgi?db=gene&cmd=Retrieve&dopt=full_report&list_uids=4381749	2	6.66298	7.68238	8.9511	1	3.19857	3.65142	4.30854	2	5.2931	5.87568	6.94017	0	0	0	0	0	0	0	0	3	7.09964	7.68678	10.0742	2	4.61556	5.01295	5.78118	0	0	0	0	0	0	0	0	0	0	0	0	2	4.51212	5.03038	6.82063	2	4.60245
PA14_00690	PA14 ref	69374..70261	https://www.ncbi.nlm.nih.gov/entrez/query.fcgi?db=gene&cmd=Retrieve&dopt=full_report&list_uids=4381750	4	13.8212	15.9358	17.9022	2	6.63487	7.57423	8.61708	4	10.9796	12.1881	13.8803	2	5.63644	6.19492	7.29923	8	22.3972	24.891	29.156	3	7.36348	7.97243	10.0742	4	9.57417	10.3985	11.5624	1	2.36083	2.59261	3.11575	2	4.73286	5.17867	6.27072	2	4.84623	5.29649	6.317	2	4.6798	5.21732	6.82063	1	2.38675
PA14_00700	PA14 ref	70324..71028	https://www.ncbi.nlm.nih.gov/entrez/query.fcgi?db=gene&cmd=Retrieve&dopt=full_report&list_uids=4381751	3	13.0566	15.0542	13.4266	1	4.17855	4.77016	4.30854	2	6.91482	7.67588	6.94017	4	14.199	15.6059	14.5985	1	3.52636	3.91901	3.64449	0	0	0	0	2	6.02969	6.54883	5.78118	0	0	0	0	3	8.94208	9.78439	9.40608	5	15.2605	16.6783	15.7925	2	5.89456	6.57161	6.82063	3	9.01885
osmC	PA14 ref	71112..71567	https://www.ncbi.nlm.nih.gov/entrez/query.fcgi?db=gene&cmd=Retrieve&dopt=full_report&list_uids=4381752	176	1184.26	1365.44	787.697	268	1731.35	1976.48	1154.69	248	1325.64	1471.55	860.581	224	1229.34	1351.14	817.513	170	926.83	1030.03	619.564	152	726.53	786.613	510.426	203	946.205	1027.67	586.789	217	997.636	1095.58	676.117	184	847.928	927.8	576.906	135	637.024	696.209	426.397	145	660.714	736.604	494.496	131	608.871
PA14_00720	PA14 ref	71678..71911	https://www.ncbi.nlm.nih.gov/entrez/query.fcgi?db=gene&cmd=Retrieve&dopt=full_report&list_uids=4381753	43	563.834	650.097	192.449	43	541.337	617.98	185.267	32	333.33	370.017	111.043	22	235.285	258.598	80.2915	22	233.734	259.76	80.1789	36	335.321	363.052	120.89	47	426.91	463.665	135.858	33	295.648	324.674	102.82	36	323.29	353.743	112.873	33	303.449	331.641	104.23	50	443.981	494.977	170.516	37	335.124
PA14_00730	PA14 ref	complement(71923..72360)	https://www.ncbi.nlm.nih.gov/entrez/query.fcgi?db=gene&cmd=Retrieve&dopt=full_report&list_uids=4381754	28	196.147	226.157	125.315	21	141.241	161.238	90.4794	35	194.775	216.213	121.453	29	165.696	182.114	105.839	27	153.252	170.316	98.4014	32	159.239	172.408	107.458	34	164.991	179.196	98.28	25	119.658	131.406	77.8937	19	91.1561	99.7427	59.5718	20	98.2524	107.381	63.17	37	175.525	195.685	126.182	32	154.844
PA14_00740	PA14 ref	complement(72417..72833)	https://www.ncbi.nlm.nih.gov/entrez/query.fcgi?db=gene&cmd=Retrieve&dopt=full_report&list_uids=4380409	4	29.4322	33.9351	17.9022	5	35.3223	40.3233	21.5427	5	29.2263	32.443	17.3504	11	66.0152	72.5563	40.1458	14	83.4657	92.7594	51.0229	9	47.0415	50.9318	30.2226	15	76.4556	83.0382	43.3588	13	65.3558	71.7723	40.5047	22	110.865	121.308	68.9779	20	103.2	112.788	63.17	15	74.7421	83.327	51.1547	8	40.6605
PA14_00750	PA14 ref	72925..74052	https://www.ncbi.nlm.nih.gov/entrez/query.fcgi?db=gene&cmd=Retrieve&dopt=full_report&list_uids=4380410	8	21.761	25.0903	35.8044	7	18.2812	20.8694	30.1598	3	6.48264	7.19614	10.4103	8	17.7488	19.5074	29.1969	5	11.0199	12.2469	18.2225	8	15.4581	16.7365	26.8645	12	22.6113	24.5581	34.6871	10	18.5852	20.4099	31.1575	14	26.0811	28.5378	43.895	12	22.8907	25.0174	37.902	11	20.2625	22.5899	37.5135	13	24.4261
PA14_00760	PA14 ref	complement(74060..75043)	https://www.ncbi.nlm.nih.gov/entrez/query.fcgi?db=gene&cmd=Retrieve&dopt=full_report&list_uids=4380411	1	3.11819	3.59526	4.47555	6	17.9627	20.5059	25.8512	4	9.90843	10.999	13.8803	10	25.4327	27.9527	36.4961	4	10.106	11.2313	14.578	6	13.2902	14.3893	20.1484	12	25.9203	28.152	34.6871	6	12.783	14.038	18.6945	8	17.0845	18.6938	25.0829	5	10.9336	11.9494	15.7925	3	6.33485	7.06247	10.2309	3	6.46168
PA14_00770	PA14 ref	complement(75076..75741)	https://www.ncbi.nlm.nih.gov/entrez/query.fcgi?db=gene&cmd=Retrieve&dopt=full_report&list_uids=4380412	3	13.8212	15.9358	13.4266	5	22.1162	25.2474	21.5427	9	32.9388	36.5642	31.2308	7	26.3034	28.9096	25.5473	4	14.9314	16.594	14.578	8	26.1813	28.3464	26.8645	5	15.957	17.3308	14.4529	5	15.7388	17.284	15.5787	4	12.6209	13.8098	12.5414	4	12.9233	14.124	12.634	2	6.23973	6.95643	6.82063	2	6.36465
PA14_00780	PA14 ref	complement(75734..76276)	https://www.ncbi.nlm.nih.gov/entrez/query.fcgi?db=gene&cmd=Retrieve&dopt=full_report&list_uids=4380413	4	22.6026	26.0607	17.9022	4	21.7008	24.7732	17.2342	8	35.9112	39.8637	27.7607	3	13.8264	15.1964	10.9488	10	45.7842	50.8822	36.4449	5	20.0699	21.7297	16.7903	2	7.82861	8.50262	5.78118	5	19.304	21.1992	15.5787	10	38.6996	42.345	31.3536	3	11.888	12.9925	9.47549	6	22.9595	25.5966	20.4619	3	11.7096
prlC	PA14 ref	76354..78399	https://www.ncbi.nlm.nih.gov/entrez/query.fcgi?db=gene&cmd=Retrieve&dopt=full_report&list_uids=4380414	39	58.4867	67.4349	174.546	40	57.593	65.747	172.342	51	60.7581	67.4454	176.974	39	47.7031	52.4297	142.335	29	35.2378	39.1614	105.69	36	38.3505	41.5221	120.89	59	61.2915	66.5685	170.545	37	37.9117	41.6338	115.283	50	51.3536	56.1909	156.768	51	53.6354	58.6186	161.083	36	36.5601	40.7594	122.771	24	24.8613
PA14_00800	PA14 ref	78396..78671	https://www.ncbi.nlm.nih.gov/entrez/query.fcgi?db=gene&cmd=Retrieve&dopt=full_report&list_uids=4380415	6	66.7023	76.9073	26.8533	6	64.0409	73.1078	25.8512	8	70.6514	78.4275	27.7607	8	72.5385	79.7259	29.1969	6	54.0453	60.0632	21.867	8	63.1765	68.4012	26.8645	6	46.2058	50.1839	17.3435	6	45.5742	50.0486	18.6945	7	53.2961	58.3164	21.9475	9	70.165	76.6839	28.4265	3	22.5851	25.1793	10.2309	6	46.0746
PA14_00810	PA14 ref	78760..79818	https://www.ncbi.nlm.nih.gov/entrez/query.fcgi?db=gene&cmd=Retrieve&dopt=full_report&list_uids=4380416	5	14.4868	16.7032	22.3777	8	22.2541	25.4048	34.4683	0	0	0	0	3	7.08946	7.79191	10.9488	3	7.04273	7.82693	10.9335	4	8.23263	8.91347	13.4323	5	10.0353	10.8993	14.4529	2	3.95923	4.34794	6.23149	0	0	0	0	2	4.0637	4.44125	6.317	5	9.81035	10.9372	17.0516	3	6.00405
PA14_00820	PA14 ref	complement(80049..80963)	https://www.ncbi.nlm.nih.gov/entrez/query.fcgi?db=gene&cmd=Retrieve&dopt=full_report&list_uids=4380417	15	50.3001	57.9957	67.1332	27	86.9276	99.2349	116.331	27	71.9254	79.8418	93.6923	45	123.078	135.273	164.233	37	100.53	111.724	134.846	25	59.5516	64.4765	83.9517	53	123.114	133.714	153.201	40	91.6465	100.644	124.63	18	41.3388	45.2328	56.4365	32	75.2517	82.2431	101.072	22	49.9588	55.6971	75.0269	13	30.1121
PA14_00830	PA14 ref	complement(81025..82737)	https://www.ncbi.nlm.nih.gov/entrez/query.fcgi?db=gene&cmd=Retrieve&dopt=full_report&list_uids=4380418	54	96.7241	111.522	241.68	62	106.623	121.718	267.13	51	72.5692	80.5565	176.974	78	113.953	125.244	284.67	78	113.202	125.807	284.271	85	108.152	117.097	285.436	69	85.6142	92.9853	199.451	90	110.144	120.958	280.417	65	79.7374	87.2484	203.798	64	80.3914	87.8604	202.144	89	107.955	120.355	303.518	98	121.252
PA14_00850	PA14 ref	complement(82730..83929)	https://www.ncbi.nlm.nih.gov/entrez/query.fcgi?db=gene&cmd=Retrieve&dopt=full_report&list_uids=4380419	2	5.11384	5.89623	8.9511	0	0	0	0	1	2.03123	2.25479	3.47009	0	0	0	0	0	0	0	0	2	3.63265	3.93307	6.71614	0	0	0	0	2	3.49402	3.83706	6.23149	1	1.75116	1.91611	3.13536	1	1.79311	1.9597	3.1585	1	1.73153	1.93041	3.41032	1	1.76619
PA14_00860	PA14 ref	complement(83929..84648)	https://www.ncbi.nlm.nih.gov/entrez/query.fcgi?db=gene&cmd=Retrieve&dopt=full_report&list_uids=4380420	0	0	0	0	0	0	0	0	0	0	0	0	0	0	0	0	0	0	0	0	1	3.02721	3.27756	3.35807	0	0	0	0	0	0	0	0	0	0	0	0	0	0	0	0	0	0	0	0	0	0
ppkA	PA14 ref	complement(84645..87743)	https://www.ncbi.nlm.nih.gov/entrez/query.fcgi?db=gene&cmd=Retrieve&dopt=full_report&list_uids=4384034	5	4.95047	5.70787	22.3777	4	3.80236	4.3407	17.2342	4	3.14614	3.49242	13.8803	2	1.61509	1.77512	7.29923	2	1.60444	1.78309	7.28899	6	4.21992	4.56891	20.1484	6	4.11513	4.46943	17.3435	4	2.70592	2.97158	12.463	1	0.678086	0.741959	3.13536	6	4.16598	4.55303	18.951	7	4.69339	5.23248	23.8722	4	2.73563
PA14_00890	PA14 ref	complement(87751..88479)	https://www.ncbi.nlm.nih.gov/entrez/query.fcgi?db=gene&cmd=Retrieve&dopt=full_report&list_uids=4380421	2	8.41784	9.70573	8.9511	1	4.04099	4.61311	4.30854	0	0	0	0	2	6.86578	7.54607	7.29923	1	3.41027	3.78999	3.64449	0	0	0	0	1	2.91559	3.16661	2.89059	1	2.87574	3.15807	3.11575	1	2.88256	3.15409	3.13536	1	2.95161	3.22584	3.1585	0	0	0	0	1	2.90731
PA14_00900	PA14 ref	complement(88489..89169)	https://www.ncbi.nlm.nih.gov/entrez/query.fcgi?db=gene&cmd=Retrieve&dopt=full_report&list_uids=4380422	3	13.5168	15.5847	13.4266	0	0	0	0	1	3.57926	3.9732	3.47009	0	0	0	0	0	0	0	0	1	3.20057	3.46526	3.35807	3	9.36329	10.1694	8.67176	0	0	0	0	2	6.17148	6.75281	6.27072	2	6.31932	6.90643	6.317	2	6.10229	6.80321	6.82063	1	3.11223
PA14_00910	PA14 ref	complement(89166..92474)	https://www.ncbi.nlm.nih.gov/entrez/query.fcgi?db=gene&cmd=Retrieve&dopt=full_report&list_uids=4380423	14	12.9816	14.9678	62.6577	6	5.34158	6.09784	25.8512	12	8.83943	9.81233	41.641	10	7.56294	8.31231	36.4961	1	0.75131	0.834967	3.64449	7	4.6108	4.99211	23.5065	15	9.63493	10.4645	43.3588	17	10.7703	11.8277	52.9677	15	9.52578	10.4231	47.0304	9	5.85238	6.39612	28.4265	6	3.7676	4.20035	20.4619	1	0.640505
PA14_00925	PA14 ref	complement(92696..94045)	https://www.ncbi.nlm.nih.gov/entrez/query.fcgi?db=gene&cmd=Retrieve&dopt=full_report&list_uids=4384005	3	6.81845	7.86164	13.4266	1	2.18213	2.49108	4.30854	1	1.80554	2.00426	3.47009	2	3.70752	4.07488	7.29923	1	1.84154	2.0466	3.64449	8	12.9161	13.9842	26.8645	5	7.8721	8.54986	14.4529	6	9.3174	10.2322	18.6945	3	4.66975	5.10963	9.40608	2	3.18774	3.48391	6.317	5	7.69567	8.5796	17.0516	0	0
PA14_00940	PA14 ref	complement(94052..95386)	https://www.ncbi.nlm.nih.gov/entrez/query.fcgi?db=gene&cmd=Retrieve&dopt=full_report&list_uids=4380424	1	2.29835	2.64999	4.47555	1	2.20665	2.51907	4.30854	12	21.9099	24.3213	41.641	3	5.62377	6.181	10.9488	3	5.58671	6.20878	10.9335	8	13.0612	14.1414	26.8645	10	15.9211	17.2918	28.9059	6	9.42209	10.3471	18.6945	6	9.44444	10.3341	18.8122	6	9.67068	10.5692	18.951	7	10.895	12.1464	23.8722	1	1.58759
PA14_00960	PA14 ref	complement(95402..95866)	https://www.ncbi.nlm.nih.gov/entrez/query.fcgi?db=gene&cmd=Retrieve&dopt=full_report&list_uids=4380425	1	6.5985	7.60804	4.47555	1	6.33523	7.23217	4.30854	1	5.24188	5.81882	3.47009	1	5.38189	5.91515	3.64961	4	21.3857	23.7669	14.578	6	28.1237	30.4496	20.1484	8	36.5672	39.7155	23.1247	10	45.0842	49.5104	31.1575	3	13.5573	14.8344	9.40608	5	23.1368	25.2864	15.7925	0	0	0	0	1	4.55791
PA14_00970	PA14 ref	complement(95911..96453)	https://www.ncbi.nlm.nih.gov/entrez/query.fcgi?db=gene&cmd=Retrieve&dopt=full_report&list_uids=4380426	1	5.65065	6.51517	4.47555	1	5.4252	6.1933	4.30854	5	22.4445	24.9148	17.3504	0	0	0	0	2	9.15685	10.1764	7.28899	7	28.0978	30.4215	23.5065	13	50.8859	55.267	37.5776	6	23.1648	25.4391	18.6945	16	61.9193	67.7519	50.1657	9	35.664	38.9774	28.4265	7	26.786	29.8627	23.8722	3	11.7096
PA14_00980	PA14 ref	complement(96450..97409)	https://www.ncbi.nlm.nih.gov/entrez/query.fcgi?db=gene&cmd=Retrieve&dopt=full_report&list_uids=4380427	30	95.8845	110.554	134.266	28	85.9215	98.0863	120.639	32	81.2491	90.1916	111.043	38	99.0604	108.876	138.685	26	67.3314	74.8287	94.7569	29	65.8418	71.2868	97.384	50	110.701	120.232	144.529	57	124.475	136.695	177.598	51	111.636	122.152	159.903	37	82.9311	90.6361	116.864	48	103.892	115.825	163.695	45	99.3483
PA14_00990	PA14 ref	97777..98811	https://www.ncbi.nlm.nih.gov/entrez/query.fcgi?db=gene&cmd=Retrieve&dopt=full_report&list_uids=4380428	18	53.3618	61.5259	80.5599	25	71.1566	81.2309	107.714	31	73.0064	81.0418	107.573	35	84.6282	93.0135	127.736	31	74.4624	82.7537	112.979	53	111.612	120.842	177.978	58	119.108	129.363	167.654	64	129.633	142.36	199.408	42	85.2737	93.3062	131.685	40	83.1585	90.8846	126.34	28	56.2119	62.6684	95.4888	22	45.0507
PA14_01010	PA14 ref	98900..99418	https://www.ncbi.nlm.nih.gov/entrez/query.fcgi?db=gene&cmd=Retrieve&dopt=full_report&list_uids=4383501	6	35.4717	40.8987	26.8533	10	56.7607	64.7969	43.0854	15	70.4472	78.2008	52.0513	12	57.8631	63.5964	43.7954	21	100.593	111.794	76.5344	23	96.5907	104.579	77.2356	52	212.956	231.291	150.311	42	169.652	186.308	130.861	26	105.272	115.188	81.5193	36	149.253	163.12	113.706	44	176.155	196.388	150.054	7	28.5858
PA14_01020	PA14 ref	99431..100927	https://www.ncbi.nlm.nih.gov/entrez/query.fcgi?db=gene&cmd=Retrieve&dopt=full_report&list_uids=4383502	18	36.8934	42.5379	80.5599	16	31.4857	35.9435	68.9367	36	58.6166	65.0681	124.923	42	70.2126	77.1695	153.284	26	43.1785	47.9863	94.7569	57	82.9904	89.8536	191.41	115	163.279	177.337	332.418	65	91.0267	99.9634	202.524	53	74.3978	81.4059	166.174	61	87.6789	95.825	192.668	31	43.0279	47.9701	105.72	6	8.49471
PA14_01030	PA14 ref	101003..101491	https://www.ncbi.nlm.nih.gov/entrez/query.fcgi?db=gene&cmd=Retrieve&dopt=full_report&list_uids=4383503	11	69.0211	79.581	49.231	9	54.2187	61.895	38.7769	18	89.7229	99.5981	62.4615	15	76.7662	84.3725	54.7442	17	86.4283	96.0519	61.9564	22	98.0592	106.169	73.8775	27	117.357	127.461	78.0459	27	115.753	127.117	84.1252	24	103.136	112.851	75.2486	22	96.8057	105.8	69.4869	18	76.4846	85.2696	61.3857	3	13.0026
PA14_01040	PA14 ref	101659..102504	https://www.ncbi.nlm.nih.gov/entrez/query.fcgi?db=gene&cmd=Retrieve&dopt=full_report&list_uids=4383504	1	3.62684	4.18172	4.47555	1	3.48213	3.97513	4.30854	3	8.64352	9.59486	10.4103	2	5.91626	6.50247	7.29923	6	17.6318	19.5951	21.867	5	12.8817	13.947	16.7903	6	15.0742	16.3721	17.3435	14	34.6924	38.0984	43.6205	3	7.45173	8.15366	9.40608	6	15.2605	16.6783	18.951	4	9.82426	10.9527	13.6413	6	15.0314
PA14_01060	PA14 ref	102506..103015	https://www.ncbi.nlm.nih.gov/entrez/query.fcgi?db=gene&cmd=Retrieve&dopt=full_report&list_uids=4383505	0	0	0	0	0	0	0	0	0	0	0	0	2	9.81403	10.7864	7.29923	1	4.87467	5.41746	3.64449	1	4.2737	4.62714	3.35807	5	20.8379	22.632	14.4529	1	4.11062	4.51419	3.11575	1	4.12037	4.50849	3.13536	2	8.43814	9.22212	6.317	1	4.07418	4.54214	3.41032	0	0
PA14_01070	PA14 ref	103012..104871	https://www.ncbi.nlm.nih.gov/entrez/query.fcgi?db=gene&cmd=Retrieve&dopt=full_report&list_uids=4383506	6	9.89775	11.4121	26.8533	5	7.91904	9.04022	21.5427	3	3.93141	4.36411	10.4103	5	6.72736	7.39393	18.2481	5	6.68302	7.42716	18.2225	4	4.68729	5.07493	13.4323	8	9.14179	9.92887	23.1247	10	11.271	12.3776	31.1575	4	4.51911	4.9448	12.5414	5	5.78421	6.32161	15.7925	4	4.46845	4.9817	13.6413	2	2.27896
PA14_01080	PA14 ref	104835..105881	https://www.ncbi.nlm.nih.gov/entrez/query.fcgi?db=gene&cmd=Retrieve&dopt=full_report&list_uids=4383507	3	8.7917	10.1368	13.4266	6	16.8818	19.272	25.8512	1	2.32805	2.58429	3.47009	2	4.78047	5.25414	7.29923	1	2.37448	2.63888	3.64449	3	6.24524	6.76172	10.0742	2	4.06011	4.40967	5.78118	4	8.00922	8.79555	12.463	2	4.01411	4.39223	6.27072	1	2.05514	2.24607	3.1585	3	5.95367	6.63751	10.2309	1	2.02429
PA14_01100	PA14 ref	105874..108582	https://www.ncbi.nlm.nih.gov/entrez/query.fcgi?db=gene&cmd=Retrieve&dopt=full_report&list_uids=4383508	6	6.7958	7.83552	26.8533	10	10.8744	12.414	43.0854	13	11.697	12.9844	45.1111	8	7.39041	8.12268	29.1969	8	7.3417	8.15919	29.156	12	9.65488	10.4533	40.2968	18	14.1227	15.3386	52.0306	17	13.1558	14.4474	52.9677	5	3.87853	4.24387	15.6768	8	6.35431	6.94467	25.268	9	6.90309	7.69599	30.6928	6	4.6942
PA14_01110	PA14 ref	108629..110560	https://www.ncbi.nlm.nih.gov/entrez/query.fcgi?db=gene&cmd=Retrieve&dopt=full_report&list_uids=4383509	11	17.4696	20.1424	49.231	5	7.62392	8.70331	21.5427	10	12.6163	14.0049	34.7009	6	7.77198	8.54206	21.8977	8	10.2943	11.4406	29.156	10	11.2815	12.2145	33.5807	14	15.4019	16.728	40.4682	14	15.1914	16.6829	43.6205	7	7.61372	8.33091	21.9475	11	12.251	13.3893	34.7435	9	9.67934	10.7911	30.6928	6	6.58208
PA14_01120	PA14 ref	complement(110675..110959)	https://www.ncbi.nlm.nih.gov/entrez/query.fcgi?db=gene&cmd=Retrieve&dopt=full_report&list_uids=4383510	0	0	0	0	0	0	0	0	2	17.1051	18.9877	6.94017	3	26.3429	28.9531	10.9488	1	8.7231	9.6944	3.64449	2	15.2954	16.5603	6.71614	5	37.2889	40.4993	14.4529	4	29.4234	32.3121	12.463	1	7.37329	8.06783	3.13536	2	15.0998	16.5027	6.317	3	21.8719	24.3841	10.2309	4	29.7464
PA14_01130	PA14 ref	complement(110972..111205)	https://www.ncbi.nlm.nih.gov/entrez/query.fcgi?db=gene&cmd=Retrieve&dopt=full_report&list_uids=4383511	1	13.1124	15.1185	4.47555	4	50.3569	57.4865	17.2342	3	31.2497	34.6891	10.4103	1	10.6948	11.7545	3.64961	4	42.4972	47.2291	14.578	2	18.629	20.1696	6.71614	4	36.3328	39.4609	11.5624	7	62.7132	68.8703	21.8102	7	62.862	68.7834	21.9475	7	64.3679	70.3482	22.1095	9	79.9166	89.0958	30.6928	3	27.1722
PA14_01140	PA14 ref	complement(111195..112514)	https://www.ncbi.nlm.nih.gov/entrez/query.fcgi?db=gene&cmd=Retrieve&dopt=full_report&list_uids=4383512	2	4.64894	5.36021	8.9511	5	11.1586	12.7385	21.5427	5	9.23285	10.2491	17.3504	6	11.3754	12.5025	21.8977	7	13.1838	14.6518	25.5115	5	8.25602	8.93879	16.7903	8	12.8816	13.9907	23.1247	5	7.94096	8.72059	15.5787	7	11.1437	12.1934	21.9475	7	11.4107	12.4708	22.1095	6	9.44469	10.5295	20.4619	3	4.81689
PA14_01150	PA14 ref	complement(112593..113027)	https://www.ncbi.nlm.nih.gov/entrez/query.fcgi?db=gene&cmd=Retrieve&dopt=full_report&list_uids=4383513	0	0	0	0	0	0	0	0	3	16.8102	18.6603	10.4103	5	28.7653	31.6154	18.2481	3	17.1454	19.0545	10.9335	3	15.0317	16.2748	10.0742	6	29.3168	31.8408	17.3435	6	28.9161	31.755	18.6945	3	14.4923	15.8575	9.40608	4	19.786	21.6243	12.634	7	33.4364	37.2769	23.8722	7	34.1058
PA14_01160	PA14 ref	113281..115506	https://www.ncbi.nlm.nih.gov/entrez/query.fcgi?db=gene&cmd=Retrieve&dopt=full_report&list_uids=4383514	54	74.4332	85.8211	241.68	56	74.1102	84.6028	241.278	83	90.8851	100.888	288.017	87	97.8096	107.501	317.516	83	92.6977	103.019	302.493	84	82.2487	89.0506	282.078	86	82.1159	89.1858	248.591	131	123.374	135.486	408.163	83	78.3536	85.7343	260.235	78	75.3974	82.4025	246.363	90	84.0094	93.6587	306.928	76	72.3615
PA14_01170	PA14 ref	115534..115983	https://www.ncbi.nlm.nih.gov/entrez/query.fcgi?db=gene&cmd=Retrieve&dopt=full_report&list_uids=4383515	1	6.81845	7.86164	4.47555	1	6.5464	7.47324	4.30854	4	21.6664	24.0511	13.8803	5	27.8064	30.5616	18.2481	1	5.52463	6.13979	3.64449	4	19.3741	20.9764	13.4323	6	28.3396	30.7795	17.3435	4	18.6348	20.4643	12.463	1	4.66975	5.10963	3.13536	2	9.56323	10.4517	6.317	6	27.7044	30.8866	20.4619	4	18.8394
PA14_01180	PA14 ref	115913..117112	https://www.ncbi.nlm.nih.gov/entrez/query.fcgi?db=gene&cmd=Retrieve&dopt=full_report&list_uids=4383516	2	5.11384	5.89623	8.9511	0	0	0	0	4	8.12491	9.01916	13.8803	4	8.34193	9.16848	14.5985	3	6.21521	6.90726	10.9335	2	3.63265	3.93307	6.71614	7	12.3986	13.466	20.2341	9	15.7231	17.2668	28.0417	4	7.00463	7.66444	12.5414	4	7.17242	7.8388	12.634	3	5.19458	5.79123	10.2309	1	1.76619
PA14_01190	PA14 ref	117109..118146	https://www.ncbi.nlm.nih.gov/entrez/query.fcgi?db=gene&cmd=Retrieve&dopt=full_report&list_uids=4383517	3	8.86793	10.2247	13.4266	2	5.67607	6.47969	8.61708	2	4.69648	5.21339	6.94017	2	4.82192	5.2997	7.29923	2	4.79014	5.32352	7.28899	2	4.19959	4.5469	6.71614	5	10.2383	11.1198	14.4529	5	10.0983	11.0898	15.5787	1	2.02446	2.21516	3.13536	6	12.4377	13.5933	18.951	5	10.0088	11.1584	17.0516	3	6.12552
PA14_01200	PA14 ref	118146..119237	https://www.ncbi.nlm.nih.gov/entrez/query.fcgi?db=gene&cmd=Retrieve&dopt=full_report&list_uids=4383518	8	22.4784	25.9175	35.8044	4	10.7908	12.3185	17.2342	7	15.6248	17.3445	24.2906	7	16.0422	17.6317	25.5473	4	9.10654	10.1205	14.578	9	17.9636	19.4492	30.2226	7	13.6248	14.7978	20.2341	9	17.2781	18.9745	28.0417	6	11.5461	12.6337	18.8122	6	11.8227	12.9211	18.951	18	34.25	38.1839	61.3857	14	27.1722
PA14_01220	PA14 ref	119248..120168	https://www.ncbi.nlm.nih.gov/entrez/query.fcgi?db=gene&cmd=Retrieve&dopt=full_report&list_uids=4383519	3	9.99447	11.5236	13.4266	4	12.7943	14.6057	17.2342	10	26.4655	29.3784	34.7009	3	8.15172	8.95942	10.9488	4	10.7973	11.9996	14.578	10	23.6655	25.6226	33.5807	6	13.8467	15.0388	17.3435	7	15.9337	17.498	21.8102	7	15.9715	17.4759	21.9475	7	16.3541	17.8735	22.1095	16	36.097	40.2431	54.565	14	32.2172
PA14_01230	PA14 ref	120178..121410	https://www.ncbi.nlm.nih.gov/entrez/query.fcgi?db=gene&cmd=Retrieve&dopt=full_report&list_uids=4383520	1	2.48849	2.86921	4.47555	1	2.3892	2.72746	4.30854	1	1.97686	2.19444	3.47009	2	4.05933	4.46155	7.29923	0	0	0	0	2	3.53542	3.8278	6.71614	3	5.17145	5.61669	8.67176	4	6.80102	7.46873	12.463	2	3.40858	3.72965	6.27072	4	6.98046	7.629	12.634	3	5.05555	5.63623	10.2309	4	6.87568
PA14_01240	PA14 ref	121786..122514	https://www.ncbi.nlm.nih.gov/entrez/query.fcgi?db=gene&cmd=Retrieve&dopt=full_report&list_uids=4383521	44	185.193	213.526	196.924	36	145.476	166.072	155.107	52	173.866	193.003	180.444	64	219.705	241.474	233.575	60	204.616	227.4	218.67	55	164.441	178.04	184.694	51	148.695	161.497	147.42	36	103.527	113.691	112.167	72	207.544	227.094	225.746	62	183	200.002	195.827	105	299.276	333.651	358.083	47	136.644
PA14_01250	PA14 ref	122725..124296	https://www.ncbi.nlm.nih.gov/entrez/query.fcgi?db=gene&cmd=Retrieve&dopt=full_report&list_uids=4383522	9	17.5666	20.2542	40.2799	26	48.7232	55.6215	112.022	37	57.3705	63.6849	128.393	50	79.5985	87.4855	182.481	73	115.448	128.303	266.048	18	24.9571	27.0211	60.4452	31	41.9144	45.5231	89.6082	20	26.6719	29.2905	62.3149	26	34.7558	38.0297	81.5193	42	57.4889	62.8301	132.657	12	15.8613	17.6831	40.9238	7	9.43766
PA14_01270	PA14 ref	124433..125029	https://www.ncbi.nlm.nih.gov/entrez/query.fcgi?db=gene&cmd=Retrieve&dopt=full_report&list_uids=4383523	16	82.2326	94.8137	71.6088	23	113.493	129.561	99.0964	37	151.066	167.693	128.393	37	155.101	170.469	135.036	40	166.572	185.119	145.78	17	62.0654	67.1981	57.0871	19	67.6447	73.4686	54.9212	19	66.72	73.2705	59.1992	39	137.277	150.208	122.279	27	97.3143	106.356	85.2794	13	45.2459	50.4429	44.3341	3	10.6504
coxB	PA14 ref	125293..126417	https://www.ncbi.nlm.nih.gov/entrez/query.fcgi?db=gene&cmd=Retrieve&dopt=full_report&list_uids=4383524	199	542.749	625.787	890.634	340	890.311	1016.36	1464.9	440	953.323	1058.25	1526.84	476	1058.87	1163.79	1737.22	492	1087.25	1208.31	1793.09	215	416.544	450.992	721.985	200	377.861	410.393	578.118	235	437.918	480.911	732.2	207	386.655	423.077	649.019	255	487.725	533.038	805.417	374	690.764	770.105	1275.46	359	676.334
coxA	PA14 ref	126427..128019	https://www.ncbi.nlm.nih.gov/entrez/query.fcgi?db=gene&cmd=Retrieve&dopt=full_report&list_uids=4383525	84	161.794	186.547	375.946	154	284.787	325.107	663.515	219	335.095	371.977	759.949	169	265.496	291.803	616.785	181	282.474	313.927	659.654	48	65.675	71.1063	161.187	55	73.384	79.7021	158.982	55	72.3809	79.4871	171.366	78	102.893	112.585	244.558	76	102.656	112.194	240.046	69	90.0002	100.338	235.312	58	77.1669
PA14_01310	PA14 ref	128030..128584	https://www.ncbi.nlm.nih.gov/entrez/query.fcgi?db=gene&cmd=Retrieve&dopt=full_report&list_uids=4383526	25	138.212	159.358	111.889	40	212.316	242.376	172.342	31	136.147	151.132	107.573	26	117.238	128.854	94.89	33	147.821	164.281	120.268	12	47.1263	51.0236	40.2968	22	84.2527	91.5066	63.5929	8	30.2186	33.1854	24.926	17	64.3668	70.43	53.3011	7	27.1389	29.6603	22.1095	22	82.3645	91.8249	75.0269	13	49.6443
coIII	PA14 ref	128595..129482	https://www.ncbi.nlm.nih.gov/entrez/query.fcgi?db=gene&cmd=Retrieve&dopt=full_report&list_uids=4383527	57	196.952	227.085	255.106	77	255.442	291.608	331.758	79	216.847	240.714	274.137	103	290.276	319.038	375.91	100	279.964	311.138	364.449	69	169.36	183.366	231.707	62	148.4	161.176	179.216	57	134.567	147.779	177.598	53	125.421	137.235	166.174	56	135.694	148.302	176.876	77	180.172	200.867	262.594	75	179.006
PA14_01330	PA14 ref	complement(129498..129707)	https://www.ncbi.nlm.nih.gov/entrez/query.fcgi?db=gene&cmd=Retrieve&dopt=full_report&list_uids=4383528	9	131.499	151.617	40.2799	15	210.42	240.211	64.6281	18	208.926	231.921	62.4615	20	238.341	261.956	72.9923	13	153.9	171.037	47.3784	7	72.653	78.6613	23.5065	10	101.213	109.927	28.9059	13	129.778	142.519	40.5047	7	70.0463	76.6444	21.9475	8	81.9705	89.5863	25.268	19	187.994	209.587	64.796	11	111.018
PA14_01340	PA14 ref	129723..130517	https://www.ncbi.nlm.nih.gov/entrez/query.fcgi?db=gene&cmd=Retrieve&dopt=full_report&list_uids=4383529	16	61.752	71.1998	71.6088	16	59.2882	67.6822	68.9367	20	61.3201	68.0692	69.4017	17	53.5142	58.8166	62.0434	14	43.7801	48.6549	51.0229	9	24.6746	26.7152	30.2226	9	24.0619	26.1335	26.0153	12	31.644	34.7507	37.389	9	23.7893	26.0302	28.2182	6	16.2394	17.7482	18.951	2	5.22725	5.82765	6.82063	4	10.6638
PA14_01350	PA14 ref	130492..131070	https://www.ncbi.nlm.nih.gov/entrez/query.fcgi?db=gene&cmd=Retrieve&dopt=full_report&list_uids=4383530	5	26.4966	30.5504	22.3777	5	25.4394	29.0411	21.5427	12	50.5176	56.0777	41.641	7	30.2557	33.2535	25.5473	10	42.9375	47.7186	36.4449	5	18.822	20.3786	16.7903	5	18.3546	19.9349	14.4529	3	10.8622	11.9287	9.34724	7	25.4054	27.7985	21.9475	6	22.2977	24.3693	18.951	1	3.58866	4.00085	3.41032	1	3.6605
PA14_01360	PA14 ref	131135..132208	https://www.ncbi.nlm.nih.gov/entrez/query.fcgi?db=gene&cmd=Retrieve&dopt=full_report&list_uids=4383531	1	2.85689	3.29398	4.47555	5	13.7145	15.6562	21.5427	7	15.8867	17.6352	24.2906	3	6.99044	7.68308	10.9488	7	16.2035	18.0078	25.5115	2	4.05883	4.39449	6.71614	4	7.91608	8.59762	11.5624	7	13.6638	15.0053	21.8102	4	7.8264	8.56362	12.5414	6	12.0208	13.1377	18.951	2	3.86933	4.31376	6.82063	1	1.9734
PA14_01380	PA14 ref	132234..133148	https://www.ncbi.nlm.nih.gov/entrez/query.fcgi?db=gene&cmd=Retrieve&dopt=full_report&list_uids=4383532	5	16.7667	19.3319	22.3777	4	12.8782	14.7015	17.2342	16	42.6225	47.3137	55.5214	7	19.1454	21.0424	25.5473	10	27.1703	30.1957	36.4449	7	16.6745	18.0534	23.5065	2	4.64583	5.04582	5.78118	7	16.0381	17.6127	21.8102	6	13.7796	15.0776	18.8122	7	16.4613	17.9907	22.1095	7	15.896	17.7218	23.8722	12	27.7958
PA14_01390	PA14 ref	133174..133809	https://www.ncbi.nlm.nih.gov/entrez/query.fcgi?db=gene&cmd=Retrieve&dopt=full_report&list_uids=4383533	16	77.19	88.9997	71.6088	10	46.3189	52.8767	43.0854	17	65.1526	72.3235	58.9915	12	47.2184	51.897	43.7954	10	39.0894	43.4419	36.4449	14	47.9784	51.9462	47.0129	10	33.4193	36.2966	28.9059	13	42.8512	47.0583	40.5047	12	39.6488	43.3836	37.6243	13	43.9818	48.0681	41.0605	12	39.2044	43.7074	40.9238	13	43.3217
PA14_01400	PA14 ref	complement(133849..134301)	https://www.ncbi.nlm.nih.gov/entrez/query.fcgi?db=gene&cmd=Retrieve&dopt=full_report&list_uids=4383534	8	54.1864	62.4766	35.8044	6	39.0183	44.5425	25.8512	10	53.8073	59.7296	34.7009	6	33.1467	36.431	21.8977	10	54.8804	60.9913	36.4449	12	57.7375	62.5123	40.2968	7	32.8438	35.6716	20.2341	8	37.0228	40.6576	24.926	17	78.86	86.2884	53.3011	9	42.7495	46.7213	28.4265	5	22.9341	25.5683	17.0516	6	28.0719
PA14_01410	PA14 ref	134433..134906	https://www.ncbi.nlm.nih.gov/entrez/query.fcgi?db=gene&cmd=Retrieve&dopt=full_report&list_uids=4383535	5	32.3661	37.3179	22.3777	8	49.7195	56.7588	34.4683	11	56.5658	62.7917	38.1709	16	84.4752	92.8453	58.3938	16	83.9185	93.2626	58.3119	8	36.7863	39.8285	26.8645	6	26.9046	29.221	17.3435	14	61.9194	67.9985	43.6205	7	31.0332	33.9564	21.9475	8	36.3161	39.6901	25.268	6	26.3017	29.3227	20.4619	9	40.2423
PA14_01430	PA14 ref	135162..135890	https://www.ncbi.nlm.nih.gov/entrez/query.fcgi?db=gene&cmd=Retrieve&dopt=full_report&list_uids=4383536	4	16.8357	19.4115	17.9022	1	4.04099	4.61311	4.30854	6	20.0615	22.2695	20.8205	1	3.43289	3.77304	3.64961	2	6.82053	7.57999	7.28899	0	0	0	0	2	5.83118	6.33323	5.78118	4	11.503	12.6323	12.463	0	0	0	0	1	2.95161	3.22584	3.1585	5	14.2512	15.8881	17.0516	4	11.6292
PA14_01440	PA14 ref	135915..136502	https://www.ncbi.nlm.nih.gov/entrez/query.fcgi?db=gene&cmd=Retrieve&dopt=full_report&list_uids=4383537	4	20.8728	24.0662	17.9022	1	5.01	5.71932	4.30854	4	16.5814	18.4065	13.8803	2	8.51217	9.35559	7.29923	5	21.1402	23.4941	18.2225	5	18.5339	20.0667	16.7903	2	7.22948	7.85191	5.78118	0	0	0	0	3	10.7214	11.7313	9.40608	1	3.6594	3.99939	3.1585	2	7.06745	7.87922	6.82063	0	0
PA14_01460	PA14 ref	136732..138081	https://www.ncbi.nlm.nih.gov/entrez/query.fcgi?db=gene&cmd=Retrieve&dopt=full_report&list_uids=4383538	3	6.81845	7.86164	13.4266	8	17.4571	19.9287	34.4683	13	23.472	26.0554	45.1111	7	12.9763	14.2621	25.5473	7	12.8908	14.3262	25.5115	7	11.3016	12.2362	23.5065	9	14.1698	15.3897	26.0153	10	15.529	17.0536	31.1575	6	9.3395	10.2193	18.8122	6	9.56323	10.4517	18.951	15	23.087	25.7388	51.1547	12	18.8394
PA14_01470	PA14 ref	138130..138816	https://www.ncbi.nlm.nih.gov/entrez/query.fcgi?db=gene&cmd=Retrieve&dopt=full_report&list_uids=4383539	5	22.3312	25.7477	22.3777	8	34.3043	39.1611	34.4683	4	14.192	15.754	13.8803	8	29.1421	32.0296	29.1969	7	25.3313	28.1519	25.5115	2	6.34524	6.86999	6.71614	6	18.563	20.1612	17.3435	5	15.2577	16.7557	15.5787	5	15.2939	16.7346	15.6768	6	18.7924	20.5383	18.951	4	12.098	13.4876	13.6413	2	6.1701
PA14_01480	PA14 ref	138917..139651	https://www.ncbi.nlm.nih.gov/entrez/query.fcgi?db=gene&cmd=Retrieve&dopt=full_report&list_uids=4384238	0	0	0	0	3	12.024	13.7264	12.9256	5	16.5814	18.4065	17.3504	7	23.8341	26.1956	25.5473	3	10.1473	11.2772	10.9335	6	17.7926	19.264	20.1484	4	11.5672	12.5631	11.5624	3	8.55679	9.39688	9.34724	5	14.2952	15.6417	15.6768	2	5.85504	6.39902	6.317	5	14.1349	15.7584	17.0516	4	11.5343
PA14_01490	PA14 ref	139831..140241	https://www.ncbi.nlm.nih.gov/entrez/query.fcgi?db=gene&cmd=Retrieve&dopt=full_report&list_uids=4384239	634	4733.1	5457.24	2837.5	593	4250.38	4852.15	2554.96	704	4175.14	4634.67	2442.94	726	4420.61	4858.62	2649.62	738	4464.06	4961.13	2689.64	832	4412.21	4777.1	2793.91	538	2782.24	3021.78	1555.14	504	2570.79	2823.18	1570.34	408	2086.05	2282.55	1279.23	429	2245.96	2454.63	1355	708	3579.33	3990.45	2414.5	488	2516.5
PA14_01500	PA14 ref	complement(140273..141181)	https://www.ncbi.nlm.nih.gov/entrez/query.fcgi?db=gene&cmd=Retrieve&dopt=full_report&list_uids=4384240	31	104.64	120.649	138.742	44	142.595	162.784	189.576	62	166.252	184.551	215.145	43	118.384	130.114	156.933	60	164.098	182.37	218.67	63	151.061	163.553	211.558	72	168.354	182.848	208.122	34	78.4137	86.1122	105.935	29	67.041	73.356	90.9254	59	139.661	152.637	186.351	30	68.5753	76.4519	102.309	25	58.2902
PA14_01510	PA14 ref	complement(141481..141762)	https://www.ncbi.nlm.nih.gov/entrez/query.fcgi?db=gene&cmd=Retrieve&dopt=full_report&list_uids=4384241	4	43.522	50.1807	17.9022	9	94.0175	107.329	38.7769	3	25.9306	28.7846	10.4103	1	8.87439	9.7537	3.64961	5	44.0795	48.9877	18.2225	7	54.1033	58.5776	23.5065	4	30.1485	32.7441	11.5624	7	52.0386	57.1477	21.8102	5	37.2586	40.7683	15.6768	9	68.6721	75.0523	28.4265	6	44.2092	49.2871	20.4619	7	52.61
PA14_01520	PA14 ref	complement(141759..141986)	https://www.ncbi.nlm.nih.gov/entrez/query.fcgi?db=gene&cmd=Retrieve&dopt=full_report&list_uids=4384242	7	94.2023	108.615	31.3288	2	25.8411	29.4997	8.61708	2	21.3813	23.7346	6.94017	7	76.8335	84.4465	25.5473	2	21.8078	24.236	7.28899	1	9.5596	10.3502	3.35807	3	27.9667	30.3745	8.67176	4	36.7792	40.3901	12.463	3	27.6498	30.2544	9.40608	0	0	0	0	4	36.4532	40.6402	13.6413	4	37.183
PA14_01540	PA14 ref	complement(142162..142785)	https://www.ncbi.nlm.nih.gov/entrez/query.fcgi?db=gene&cmd=Retrieve&dopt=full_report&list_uids=4384243	5	24.5858	28.3473	22.3777	1	4.72096	5.38936	4.30854	6	23.4372	26.0168	20.8205	17	68.1792	74.9347	62.0434	3	11.9523	13.2832	10.9335	7	24.4505	26.4726	23.5065	13	44.2805	48.0929	37.5776	7	23.5175	25.8264	21.8102	9	30.3085	33.1634	28.2182	13	44.8276	48.9925	41.0605	5	16.6493	18.5616	17.0516	3	10.1896
PA14_01550	PA14 ref	142886..143386	https://www.ncbi.nlm.nih.gov/entrez/query.fcgi?db=gene&cmd=Retrieve&dopt=full_report&list_uids=4384244	4	24.4974	28.2454	17.9022	3	17.64	20.1375	12.9256	1	4.86522	5.4007	3.47009	3	14.9855	16.4703	10.9488	2	9.92449	11.0296	7.28899	2	8.70096	9.42052	6.71614	1	4.24245	4.60771	2.89059	7	29.2912	32.167	21.8102	4	16.7775	18.3579	12.5414	2	8.58973	9.38778	6.317	5	20.7368	23.1187	17.0516	4	16.9216
PA14_01560	PA14 ref	143458..143799	https://www.ncbi.nlm.nih.gov/entrez/query.fcgi?db=gene&cmd=Retrieve&dopt=full_report&list_uids=4384245	14	125.603	144.82	62.6577	6	51.6821	58.9993	25.8512	12	85.5254	94.9386	41.641	16	117.08	128.68	58.3938	8	58.154	64.6294	29.156	30	191.192	207.004	100.742	22	136.726	148.498	63.5929	25	153.247	168.292	77.8937	21	129.033	141.187	65.8425	27	169.873	185.656	85.2794	34	206.568	230.294	115.951	32	198.309
gabP	PA14 ref	complement(143881..145308)	https://www.ncbi.nlm.nih.gov/entrez/query.fcgi?db=gene&cmd=Retrieve&dopt=full_report&list_uids=4384246	29	62.3115	71.8448	129.791	25	51.5736	58.8754	107.714	22	37.5521	41.6852	76.3419	12	21.0301	23.1138	43.7954	20	34.8191	38.6961	72.8899	12	18.3159	19.8306	40.2968	17	25.3032	27.4817	49.14	14	20.5531	22.5709	43.6205	32	47.0899	51.5256	100.331	18	27.1226	29.6425	56.853	20	29.1013	32.4439	68.2063	14	20.7787
PA14_01600	PA14 ref	complement(145477..146970)	https://www.ncbi.nlm.nih.gov/entrez/query.fcgi?db=gene&cmd=Retrieve&dopt=full_report&list_uids=4384247	73	149.924	172.861	326.715	68	134.083	153.066	292.981	92	150.099	166.619	319.248	73	122.281	134.397	266.422	75	124.803	138.7	273.337	100	145.89	157.955	335.807	114	162.184	176.148	329.527	86	120.677	132.525	267.954	84	118.15	129.28	263.37	65	93.616	102.314	205.302	89	123.78	137.997	303.518	65	92.2108
PA14_01610	PA14 ref	complement(147054..147341)	https://www.ncbi.nlm.nih.gov/entrez/query.fcgi?db=gene&cmd=Retrieve&dopt=full_report&list_uids=4384248	5	53.2692	61.4191	22.3777	4	40.915	46.7078	17.2342	2	16.9269	18.7899	6.94017	6	52.137	57.303	21.8977	5	43.1612	47.9671	18.2225	5	37.8401	40.9694	16.7903	13	95.9412	104.201	37.5776	1	7.27922	7.99387	3.11575	4	29.1859	31.9352	12.5414	2	14.9425	16.3308	6.317	1	7.21469	8.04337	3.41032	3	22.0774
aptA	PA14 ref	complement(147341..148687)	https://www.ncbi.nlm.nih.gov/entrez/query.fcgi?db=gene&cmd=Retrieve&dopt=full_report&list_uids=4384249	24	54.6691	63.0332	107.413	19	41.5529	47.436	81.8623	17	30.7625	34.1483	58.9915	31	57.5946	63.3013	113.138	30	55.3694	61.5346	109.335	49	79.2872	85.8442	164.545	31	48.9157	53.1272	89.6082	18	28.0144	30.7648	56.0834	19	29.641	32.433	59.5718	19	30.351	33.1709	60.0115	17	26.2236	29.2356	57.9754	12	18.8813
PA14_01640	PA14 ref	148823..149740	https://www.ncbi.nlm.nih.gov/entrez/query.fcgi?db=gene&cmd=Retrieve&dopt=full_report&list_uids=4384250	2	6.68476	7.70749	8.9511	3	9.62706	10.9901	12.9256	5	13.276	14.7372	17.3504	3	8.17836	8.9887	10.9488	5	13.5408	15.0485	18.2225	4	9.49712	10.2825	13.4323	7	16.2073	17.6026	20.2341	7	15.9857	17.5552	21.8102	6	13.7346	15.0283	18.8122	16	37.5029	40.9872	50.536	11	24.8978	27.7575	37.5135	1	2.30875
PA14_01660	PA14 ref	complement(149853..151223)	https://www.ncbi.nlm.nih.gov/entrez/query.fcgi?db=gene&cmd=Retrieve&dopt=full_report&list_uids=4384251	11	24.618	28.3845	49.231	14	30.0819	34.341	60.3196	14	24.8903	27.6298	48.5812	9	16.4283	18.0561	32.8465	14	25.3867	28.2135	51.0229	15	23.8467	25.8188	50.371	17	26.3552	28.6242	49.14	9	13.762	15.1131	28.0417	14	21.4584	23.4797	43.895	19	29.8197	32.5902	60.0115	25	37.889	42.2409	85.2579	18	27.8262
PA14_01670	PA14 ref	152381..153952	https://www.ncbi.nlm.nih.gov/entrez/query.fcgi?db=gene&cmd=Retrieve&dopt=full_report&list_uids=4384252	2	3.90369	4.50094	8.9511	2	3.74794	4.27858	8.61708	4	6.20222	6.88486	13.8803	0	0	0	0	1	1.58148	1.75757	3.64449	1	1.38651	1.50117	3.35807	1	1.35208	1.46849	2.89059	5	6.66798	7.32263	15.5787	1	1.33676	1.46268	3.13536	2	2.73757	2.99191	6.317	3	3.96533	4.42079	10.2309	2	2.69648
PA14_01680	PA14 ref	153952..155049	https://www.ncbi.nlm.nih.gov/entrez/query.fcgi?db=gene&cmd=Retrieve&dopt=full_report&list_uids=4384253	1	2.79445	3.22198	4.47555	0	0	0	0	1	2.21992	2.46425	3.47009	0	0	0	0	1	2.26419	2.51631	3.64449	0	0	0	0	1	1.93576	2.10242	2.89059	0	0	0	0	1	1.91383	2.09411	3.13536	1	1.95968	2.14175	3.1585	1	1.89238	2.10974	3.41032	1	1.93026
[truncated: 5,838 more rows]
[truncated: 6 more columns]
